# Supplementary material for: Comprehensive Computational Analysis of Honokiol Targets for Cell Cycle Inhibition and Immunotherapy in Metastatic Breast Cancer Stem Cells
Source: Hindawi journal article supplement (doi:10.1155/2022/4172531), 2022-07-08

Supplementary Table 1. Differentially expresses genes (DEGs) in metastatic breast cancer stem cells (mBCSCs) from the GSE 151191 dataset.

| ID        | adj.P.Val | P.Value   | logFC | GENE_SYMB        | GENE_NAME                                                           | Remarks     |
|-----------|-----------|-----------|-------|------------------|---------------------------------------------------------------------|-------------|
| A_33_P324 | 0.000483  | 1.16E-06  | 8.5   | TAF5L            | TAF5-like RNA polymerase II, p300/CBP-associated factor (PCAF)-asso | Upregulated |
| A_33_P324 | 0.000483  | 1.12E-06  | 8.08  | BEX2             | brain expressed X-linked 2                                          | Upregulated |
| A_33_P347 | 0.000483  | 4.55E-07  | 7.9   | ZBTB8A           | zinc finger and BTB domain containing 8A                            | Upregulated |
| A_33_P367 | 0.000483  | 9.26E-07  | 7.62  | LOC283887        | uncharacterized LOC283887                                           | Upregulated |
| A_21_P000 | 0.000483  | 4.25E-07  | 7.35  | SNORD12          | small nucleolar RNA, C/D box 12                                     | Upregulated |
| A_33_P320 | 0.000483  | 3.31E-07  | 7.24  | ZNF623           | zinc finger protein 623                                             | Upregulated |
| A_23_P413 | 0.000888  | 0.00006   | 7.23  | ZNF330           | zinc finger protein 330                                             | Upregulated |
| A_23_P422 | 0.000483  | 1.83E-06  | 7.07  | IER3             | immediate early response 3                                          | Upregulated |
| A_33_P323 | 0.000707  | 0.0000344 | 6.92  | MT1G             | metallothionein 1G                                                  | Upregulated |
| A_24_P254 | 0.000483  | 1.42E-06  | 6.87  | ARHGEF9          | Cdc42 guanine nucleotide exchange factor (GEF) 9                    | Upregulated |
| A_23_P303 | 0.000483  | 1.73E-06  | 6.85  | P4HA2            | prolyl 4-hydroxylase, alpha polypeptide II                          | Upregulated |
| A_21_P001 | 0.000483  | 1.51E-06  | 6.8   | STK32C           | serine/threonine kinase 32C                                         | Upregulated |
| A_23_P126 | 0.000483  | 4.73E-07  | 6.79  | CTH              | cystathionine gamma-lyase                                           | Upregulated |
| A_22_P000 | 0.000483  | 2.12E-06  | 6.76  | lnc-RP11-116     | lnc-RP11-116D17.1.1-10:1                                            | Upregulated |
| A_24_P360 | 0.000483  | 6.44E-07  | 6.74  | PDE7A            | phosphodiesterase 7A                                                | Upregulated |
| A_23_P273 | 0.000483  | 2.23E-06  | 6.67  | KDSR             | 3-ketodihydrosphingosine reductase                                  | Upregulated |
| A_23_P117 | 0.000483  | 1.11E-06  | 6.65  | LYSMD4           | LysM, putative peptidoglycan-binding, domain containing 4           | Upregulated |
| A_22_P000 | 0.001049  | 0.0000884 | 6.61  | lnc-MTMR9-1      | lnc-MTMR9-1:1                                                       | Upregulated |
| A_23_P424 | 0.000483  | 4.87E-07  | 6.57  | ERCC6L2          | excision repair cross-complementation group 6-like 2                | Upregulated |
| A_23_P894 | 0.000483  | 1.24E-06  | 6.54  | CCL2             | chemokine (C-C motif) ligand 2                                      | Upregulated |
| A_24_P701 | 0.000483  | 4.43E-07  | 6.52  | DTWD1            | DTW domain containing 1                                             | Upregulated |
| A_22_P000 | 0.000483  | 5.57E-07  | 6.52  | LOC1005075       | uncharacterized LOC100507564                                        | Upregulated |
| A_23_P991 | 0.000483  | 2.47E-06  | 6.48  | DRAM1            | DNA-damage regulated autophagy modulator 1                          | Upregulated |
| A_33_P340 | 0.000483  | 2.54E-06  | 6.47  | PNKP             | polynucleotide kinase 3'-phosphatase                                | Upregulated |
| A_33_P335 | 0.000614  | 0.0000235 | 6.47  | TRIM31           | tripartite motif containing 31                                      | Upregulated |
| A_22_P000 | 0.000483  | 3.03E-06  | 6.45  | PIGL             | phosphatidylinositol glycan anchor biosynthesis, class L            | Upregulated |
| A_24_P778 | 0.000483  | 4.76E-07  | 6.4   | RSL1D1           | ribosomal L1 domain containing 1                                    | Upregulated |
| A_24_P252 | 0.000483  | 1.28E-06  | 6.39  | CXCR5            | chemokine (C-X-C motif) receptor 5                                  | Upregulated |
| A_23_P212 | 0.000534  | 0.0000136 | 6.38  | HTT              | huntingtin                                                          | Upregulated |
| A_33_P323 | 0.000837  | 0.0000526 | 6.38  | ZNF100           | zinc finger protein 100                                             | Upregulated |
| A_21_P001 | 0.001353  | 0.000149  | 6.32  | lnc-MAPK8IP2-1:5 | lnc-MAPK8IP2-1:5                                                    | Upregulated |
| A_23_P128 | 0.000483  | 3.82E-06  | 6.27  | KDEL1            | KDEL (Lys-Asp-Glu-Leu) containing 1                                 | Upregulated |
| A_24_P944 | 0.000483  | 2.91E-06  | 6.25  | MAPKBP1          | mitogen-activated protein kinase binding protein 1                  | Upregulated |

|           |          |           |      |              |                                                                    |             |
|-----------|----------|-----------|------|--------------|--------------------------------------------------------------------|-------------|
| A_23_P368 | 0.000483 | 2.66E-06  | 6.22 | LRRC75A      | leucine rich repeat containing 75A                                 | Upregulated |
| A_33_P341 | 0.000483 | 2.88E-06  | 6.22 | RHEB         | Ras homolog enriched in brain                                      | Upregulated |
| A_23_P368 | 0.000483 | 3.01E-06  | 6.18 | GPRC5A       | G protein-coupled receptor, class C, group 5, member A             | Upregulated |
| A_24_P770 | 0.000483 | 3.29E-06  | 6.18 | KMO          | kynurenine 3-monooxygenase (kynurenine 3-hydroxylase)              | Upregulated |
| A_23_P577 | 0.000483 | 1.54E-06  | 6.14 | PXYLP1       | 2-phosphoxylose phosphatase 1                                      | Upregulated |
| A_22_P000 | 0.000483 | 3.07E-06  | 6.1  | LOC1005074   | uncharacterized LOC100507487                                       | Upregulated |
| A_22_P000 | 0.000483 | 3.25E-06  | 6.08 | KMT2E-AS1    | KMT2E antisense RNA 1 (head to head)                               | Upregulated |
| A_24_P334 | 0.000578 | 0.0000192 | 6.07 | GPR141       | G protein-coupled receptor 141                                     | Upregulated |
| A_23_P948 | 0.000483 | 1.04E-06  | 6.04 | F2           | coagulation factor II (thrombin)                                   | Upregulated |
| A_23_P297 | 0.000483 | 7.24E-07  | 6.03 | SGOL1        | shugoshin-like 1 (S. pombe)                                        | Upregulated |
| A_22_P000 | 0.000483 | 2.45E-06  | 5.98 | lnc-HNRNPA3  | lnc-HNRNPA3-1:1                                                    | Upregulated |
| A_33_P335 | 0.000483 | 6.5E-07   | 5.94 | LCTL         | lactase-like                                                       | Upregulated |
| A_22_P000 | 0.001006 | 0.0000809 | 5.9  | LOC1019293   | uncharacterized LOC101929340                                       | Upregulated |
| A_23_P124 | 0.000483 | 8.23E-07  | 5.86 | COQ2         | coenzyme Q2 4-hydroxybenzoate polyprenyltransferase                | Upregulated |
| A_22_P000 | 0.000483 | 8.88E-07  | 5.86 | lnc-ARNTL-1  | lnc-ARNTL-1:1                                                      | Upregulated |
| A_24_P682 | 0.000483 | 3.29E-06  | 5.86 | TRIM4        | tripartite motif containing 4                                      | Upregulated |
| A_32_P360 | 0.000483 | 0.0000036 | 5.82 | DNHD1        | dynein heavy chain domain 1                                        | Upregulated |
| A_23_P130 | 0.000483 | 9.53E-07  | 5.79 | KCTD1        | potassium channel tetramerization domain containing 1              | Upregulated |
| A_24_P213 | 0.000483 | 4.42E-06  | 5.76 | SEMA6A       | sema domain, transmembrane domain (TM), and cytoplasmic domain, (s | Upregulated |
| A_33_P337 | 0.000483 | 6.96E-07  | 5.75 | GREB1        | growth regulation by estrogen in breast cancer 1                   | Upregulated |
| A_33_P341 | 0.000526 | 0.0000123 | 5.75 | BNIP3        | BCL2/adenovirus E1B 19kDa interacting protein 3                    | Upregulated |
| A_23_P126 | 0.000978 | 0.0000754 | 5.74 | NOL9         | nucleolar protein 9                                                | Upregulated |
| A_23_P127 | 0.000483 | 9.36E-07  | 5.73 | IL2RA        | interleukin 2 receptor, alpha                                      | Upregulated |
| A_22_P000 | 0.0017   | 0.000226  | 5.73 | lnc-ZBTB10-3 | lnc-ZBTB10-3:1                                                     | Upregulated |
| A_33_P326 | 0.000489 | 0.0000074 | 5.72 | SH3GLB1      | SH3-domain GRB2-like endophilin B1                                 | Upregulated |
| A_23_P385 | 0.001299 | 0.000139  | 5.72 | PLCD4        | phospholipase C, delta 4                                           | Upregulated |
| A_22_P000 | 0.000526 | 0.000012  | 5.71 | CDK3         | cyclin-dependent kinase 3                                          | Upregulated |
| A_22_P000 | 0.000565 | 0.0000169 | 5.71 | lnc-TCEANC2  | lnc-TCEANC2-1:1                                                    | Upregulated |
| A_23_P716 | 0.000848 | 0.0000541 | 5.7  | FANCG        | Fanconi anemia, complementation group G                            | Upregulated |
| A_23_P204 | 0.000483 | 4.95E-06  | 5.69 | FARP1        | FERM, RhoGEF (ARHGEF) and pleckstrin domain protein 1 (chondrocyt  | Upregulated |
| A_33_P329 | 0.000486 | 6.64E-06  | 5.69 | CEP55        | centrosomal protein 55kDa                                          | Upregulated |
| A_22_P000 | 0.000486 | 7.14E-06  | 5.66 | lnc-PALLD-2  | lnc-PALLD-2:1                                                      | Upregulated |
| A_24_P941 | 0.000483 | 7.51E-07  | 5.65 | ZNF425       | zinc finger protein 425                                            | Upregulated |
| A_33_P334 | 0.000691 | 0.0000307 | 5.65 | WDR60        | WD repeat domain 60                                                | Upregulated |
| A_24_P226 | 0.000483 | 4.22E-06  | 5.64 | KIAA0368     | KIAA0368                                                           | Upregulated |
| A_23_P335 | 0.000728 | 0.000038  | 5.64 | ZNF721       | zinc finger protein 721                                            | Upregulated |
| A_22_P000 | 0.000483 | 4.72E-06  | 5.63 | LRIG2        | leucine-rich repeats and immunoglobulin-like domains 2             | Upregulated |

|           |          |           |      |              |                                                                           |             |
|-----------|----------|-----------|------|--------------|---------------------------------------------------------------------------|-------------|
| A_23_P533 | 0.000483 | 5.56E-06  | 5.63 | TMEM177      | transmembrane protein 177                                                 | Upregulated |
| A_23_P357 | 0.000483 | 7.86E-07  | 5.59 | PNKD         | paroxysmal nonkinesigenic dyskinesia                                      | Upregulated |
| A_21_P000 | 0.000483 | 4.42E-06  | 5.59 | EFTUD1       | elongation factor Tu GTP binding domain containing 1                      | Upregulated |
| A_23_P341 | 0.000483 | 3.05E-06  | 5.58 | WBP5         | WW domain binding protein 5                                               | Upregulated |
| A_23_P164 | 0.000483 | 1.81E-06  | 5.57 | LIN7B        | lin-7 homolog B (C. elegans)                                              | Upregulated |
| A_21_P000 | 0.000611 | 0.0000232 | 5.57 | PAXBP1-AS1   | PAXBP1 antisense RNA 1                                                    | Upregulated |
| A_23_P449 | 0.000483 | 3.15E-06  | 5.53 | DSC2         | desmocollin 2                                                             | Upregulated |
| A_33_P323 | 0.000483 | 5.41E-06  | 5.53 | HDGF         | hepatoma-derived growth factor                                            | Upregulated |
| A_21_P001 | 0.001372 | 0.000152  | 5.53 | TMEM165      | transmembrane protein 165                                                 | Upregulated |
| A_33_P681 | 0.000604 | 0.0000226 | 5.52 | lnc-GTF2F2-2 | lnc-GTF2F2-2:22                                                           | Upregulated |
| A_23_P109 | 0.000483 | 8.75E-07  | 5.49 | SDC4         | syndecan 4                                                                | Upregulated |
| A_24_P242 | 0.000483 | 6.07E-06  | 5.49 | HS2ST1       | heparan sulfate 2-O-sulfotransferase 1                                    | Upregulated |
| A_22_P000 | 0.000484 | 6.45E-06  | 5.48 | lnc-HIST2H2A | lnc-HIST2H2AA3-1:1                                                        | Upregulated |
| A_33_P322 | 0.000762 | 0.0000419 | 5.47 | COQ3         | coenzyme Q3 methyltransferase                                             | Upregulated |
| A_23_P386 | 0.001051 | 0.0000887 | 5.47 | DOLPP1       | dolichyldiphosphatase 1                                                   | Upregulated |
| A_21_P000 | 0.000483 | 5.29E-06  | 5.44 | ZNF587B      | zinc finger protein 587B                                                  | Upregulated |
| A_23_P715 | 0.00124  | 0.000126  | 5.4  | CSPP1        | centrosome and spindle pole associated protein 1                          | Upregulated |
| A_24_P943 | 0.00056  | 0.0000161 | 5.38 | SCUBE3       | signal peptide, CUB domain, EGF-like 3                                    | Upregulated |
| A_21_P000 | 0.000961 | 0.000072  | 5.37 | lnc-MBOAT4-1 | lnc-MBOAT4-2:1                                                            | Upregulated |
| A_33_P328 | 0.000483 | 1.95E-06  | 5.35 | SLC16A1      | solute carrier family 16 (monocarboxylate transporter), member 1          | Upregulated |
| A_23_P363 | 0.000788 | 0.0000458 | 5.35 | HSPA4L       | heat shock 70kDa protein 4-like                                           | Upregulated |
| A_23_P980 | 0.000483 | 9.13E-07  | 5.34 | SIRT1        | sirtuin 1                                                                 | Upregulated |
| A_33_P331 | 0.000483 | 2.19E-06  | 5.34 | STAG3        | stromal antigen 3                                                         | Upregulated |
| A_24_P370 | 0.000483 | 5.77E-06  | 5.34 | ATG10        | autophagy related 10                                                      | Upregulated |
| A_24_P812 | 0.000483 | 2.45E-06  | 5.33 | PPP6C        | protein phosphatase 6, catalytic subunit                                  | Upregulated |
| A_33_P371 | 0.00056  | 0.0000164 | 5.31 | MEGF8        | multiple EGF-like-domains 8                                               | Upregulated |
| A_21_P001 | 0.000705 | 0.0000333 | 5.31 | LOC1019299   | uncharacterized LOC101929947                                              | Upregulated |
| A_24_P984 | 0.000483 | 1.02E-06  | 5.3  | HSPA5        | heat shock 70kDa protein 5 (glucose-regulated protein, 78kDa)             | Upregulated |
| A_23_P470 | 0.000483 | 3.89E-06  | 5.3  | DHX32        | DEAH (Asp-Glu-Ala-His) box polypeptide 32                                 | Upregulated |
| A_21_P001 | 0.000483 | 9.93E-07  | 5.29 | USP32P2      | ubiquitin specific peptidase 32 pseudogene 2                              | Upregulated |
| A_24_P116 | 0.000483 | 1.33E-06  | 5.27 | STAT3        | signal transducer and activator of transcription 3 (acute-phase response) | Upregulated |
| A_23_P420 | 0.000483 | 1.03E-06  | 5.26 | PGBD4        | piggyBac transposable element derived 4                                   | Upregulated |
| A_22_P000 | 0.000483 | 5.51E-06  | 5.26 | ADAT1        | adenosine deaminase, tRNA-specific 1                                      | Upregulated |
| A_23_P940 | 0.000483 | 1.17E-06  | 5.25 | ANKRD46      | ankyrin repeat domain 46                                                  | Upregulated |
| A_23_P134 | 0.000483 | 5.57E-06  | 5.23 | CNKSR3       | CNKSR family member 3                                                     | Upregulated |
| A_23_P357 | 0.000483 | 3.93E-06  | 5.22 | GFOD2        | glucose-fructose oxidoreductase domain containing 2                       | Upregulated |
| A_23_P365 | 0.001023 | 0.000084  | 5.21 | FAM161B      | family with sequence similarity 161, member B                             | Upregulated |

|           |          |           |      |              |                                                                         |             |
|-----------|----------|-----------|------|--------------|-------------------------------------------------------------------------|-------------|
| A_24_P194 | 0.000483 | 0.000001  | 5.2  | ZNF275       | zinc finger protein 275                                                 | Upregulated |
| A_33_P337 | 0.000603 | 0.000022  | 5.2  | TMEM106A     | transmembrane protein 106A                                              | Upregulated |
| A_33_P334 | 0.000483 | 3.94E-06  | 5.19 | ZNF276       | zinc finger protein 276                                                 | Upregulated |
| A_22_P000 | 0.000483 | 5.98E-06  | 5.19 | lnc-KATNA1-2 | lnc-KATNA1-2:1                                                          | Upregulated |
| A_23_P167 | 0.000483 | 2.21E-06  | 5.17 | CYFIP2       | cytoplasmic FMR1 interacting protein 2                                  | Upregulated |
| A_32_P176 | 0.000521 | 0.0000106 | 5.17 | LINC00239    | long intergenic non-protein coding RNA 239                              | Upregulated |
| A_21_P000 | 0.001263 | 0.000132  | 5.17 | lnc-SDPR-1   | lnc-SDPR-1:1                                                            | Upregulated |
| A_33_P328 | 0.000483 | 5.66E-06  | 5.15 | FUT4         | fucosyltransferase 4 (alpha (1,3) fucosyltransferase, myeloid-specific) | Upregulated |
| A_33_P342 | 0.000506 | 8.67E-06  | 5.14 | LOC1001320   | uncharacterized LOC100132071                                            | Upregulated |
| A_33_P681 | 0.000575 | 0.0000175 | 5.12 | lnc-GTF2F2-2 | lnc-GTF2F2-2:19                                                         | Upregulated |
| A_33_P328 | 0.001043 | 0.0000873 | 5.1  | GZF1         | GDNF-inducible zinc finger protein 1                                    | Upregulated |
| A_23_P256 | 0.000483 | 6.38E-06  | 5.09 | HPSE         | heparanase                                                              | Upregulated |
| A_23_P134 | 0.000483 | 1.09E-06  | 5.08 | PHF14        | PHD finger protein 14                                                   | Upregulated |
| A_19_P003 | 0.001525 | 0.000186  | 5.08 | SMIM13       | small integral membrane protein 13                                      | Upregulated |
| A_23_P762 | 0.000483 | 4.36E-06  | 5.07 | PRR4         | proline rich 4 (lacrimal)                                               | Upregulated |
| A_22_P000 | 0.000483 | 4.55E-06  | 5.06 | SLC37A4      | solute carrier family 37 (glucose-6-phosphate transporter), member 4    | Upregulated |
| A_33_P370 | 0.001226 | 0.000124  | 5.05 | LINC00662    | long intergenic non-protein coding RNA 662                              | Upregulated |
| A_21_P001 | 0.000515 | 9.41E-06  | 5.04 | LINC01353    | long intergenic non-protein coding RNA 1353                             | Upregulated |
| A_33_P326 | 0.000483 | 1.68E-06  | 5.02 | RUFY2        | RUN and FYVE domain containing 2                                        | Upregulated |
| A_23_P429 | 0.000589 | 0.0000206 | 5.02 | KCNQ1        | potassium channel, voltage gated KQT-like subfamily Q, member 1         | Upregulated |
| A_32_P593 | 0.001067 | 0.0000927 | 5.02 | HIVEP3       | human immunodeficiency virus type I enhancer binding protein 3          | Upregulated |
| A_33_P336 | 0.000487 | 7.24E-06  | 5.01 | BCAR1        | breast cancer anti-estrogen resistance 1                                | Upregulated |
| A_23_P114 | 0.001022 | 0.0000837 | 5.01 | SEMA4C       | sema domain, immunoglobulin domain (Ig), transmembrane domain (TM)      | Upregulated |
| A_24_P849 | 0.000483 | 0.0000013 | 5    | RPL22        | ribosomal protein L22                                                   | Upregulated |
| A_33_P348 | 0.000483 | 0.0000014 | 5    | ANKRD26P3    | ankyrin repeat domain 26 pseudogene 3                                   | Upregulated |
| A_33_P341 | 0.000483 | 1.18E-06  | 4.99 | HSPA1B       | heat shock 70kDa protein 1B                                             | Upregulated |
| A_23_P111 | 0.000483 | 3.89E-06  | 4.99 | GNG11        | guanine nucleotide binding protein (G protein), gamma 11                | Upregulated |
| A_33_P382 | 0.000483 | 4.97E-06  | 4.99 | RABL6        | RAB, member RAS oncogene family-like 6                                  | Upregulated |
| A_24_P129 | 0.000513 | 8.98E-06  | 4.99 | KCNIP2       | Kv channel interacting protein 2                                        | Upregulated |
| A_33_P342 | 0.00096  | 0.0000717 | 4.97 | CNST         | consortin, connexin sorting protein                                     | Upregulated |
| A_22_P000 | 0.001032 | 0.0000854 | 4.96 | KCNIP2-AS1   | KCNIP2 antisense RNA 1                                                  | Upregulated |
| A_32_P177 | 0.000483 | 2.72E-06  | 4.95 | STX17-AS1    | STX17 antisense RNA 1                                                   | Upregulated |
| A_33_P322 | 0.000521 | 0.0000106 | 4.95 | JAM2         | junctional adhesion molecule 2                                          | Upregulated |
| A_24_P701 | 0.000537 | 0.0000141 | 4.95 | MYH11        | myosin, heavy chain 11, smooth muscle                                   | Upregulated |
| A_22_P000 | 0.000486 | 6.96E-06  | 4.94 | lnc-TCF19-1  | lnc-TCF19-1:4                                                           | Upregulated |
| A_22_P000 | 0.000483 | 1.79E-06  | 4.93 | lnc-NUDT13-1 | lnc-NUDT13-1:1                                                          | Upregulated |
| A_33_P330 | 0.000483 | 4.69E-06  | 4.93 | DCUN1D2      | DCN1, defective in cullin neddylation 1, domain containing 2            | Upregulated |

|           |          |           |      |                |                                                                             |             |
|-----------|----------|-----------|------|----------------|-----------------------------------------------------------------------------|-------------|
| A_21_P001 | 0.000526 | 0.0000128 | 4.93 | DDX11L16       | DEAD/H (Asp-Glu-Ala-Asp/His) box helicase 11 like 16                        | Upregulated |
| A_23_P170 | 0.000532 | 0.0000134 | 4.93 | IL36G          | interleukin 36, gamma                                                       | Upregulated |
| A_24_P927 | 0.000483 | 0.0000061 | 4.92 | C2CD3          | C2 calcium-dependent domain containing 3                                    | Upregulated |
| A_32_P137 | 0.000483 | 0.0000052 | 4.91 | EFCAB7         | EF-hand calcium binding domain 7                                            | Upregulated |
| A_21_P000 | 0.000483 | 4.55E-06  | 4.9  | LOC440896      | uncharacterized LOC440896                                                   | Upregulated |
| A_23_P217 | 0.001341 | 0.000146  | 4.9  | CTPS1          | CTP synthase 1                                                              | Upregulated |
| A_21_P001 | 0.000483 | 1.51E-06  | 4.87 | XLOC_I2_002311 |                                                                             | Upregulated |
| A_22_P000 | 0.000483 | 5.06E-06  | 4.87 | LOC1019270     | uncharacterized LOC101927018                                                | Upregulated |
| A_33_P321 | 0.000488 | 7.28E-06  | 4.87 | LOC1001293     | chromosome X open reading frame 69-like                                     | Upregulated |
| A_23_P344 | 0.000502 | 8.31E-06  | 4.87 | SLC35A3        | solute carrier family 35 (UDP-N-acetylglucosamine (UDP-GlcNAc) transp       | Upregulated |
| A_23_P996 | 0.000486 | 7.14E-06  | 4.86 | SLC7A7         | solute carrier family 7 (amino acid transporter light chain, y+L system), m | Upregulated |
| A_24_P267 | 0.000483 | 1.49E-06  | 4.85 | ZNF585A        | zinc finger protein 585A                                                    | Upregulated |
| A_24_P483 | 0.000828 | 0.0000517 | 4.85 | CWC25          | CWC25 spliceosome-associated protein homolog (S. cerevisiae)                | Upregulated |
| A_23_P388 | 0.000502 | 0.0000084 | 4.83 | ZNF552         | zinc finger protein 552                                                     | Upregulated |
| A_24_P339 | 0.000483 | 1.42E-06  | 4.82 | ARSG           | arylsulfatase G                                                             | Upregulated |
| A_22_P000 | 0.000701 | 0.0000329 | 4.81 | lnc-CEP41-1    | lnc-CEP41-1:1                                                               | Upregulated |
| A_23_P273 | 0.002688 | 0.00048   | 4.81 | EMILIN2        | elastin microfibril interfacier 2                                           | Upregulated |
| A_33_P329 | 0.000483 | 5.41E-06  | 4.78 | GRASP          | GRP1 (general receptor for phosphoinositides 1)-associated scaffold pr      | Upregulated |
| A_33_P325 | 0.000739 | 0.000039  | 4.77 | LOC1001306     | uncharacterized LOC100130642                                                | Upregulated |
| A_33_P323 | 0.000546 | 0.0000148 | 4.75 | MAP3K14-AS     | MAP3K14 antisense RNA 1                                                     | Upregulated |
| A_24_P822 | 0.000706 | 0.0000334 | 4.75 | HS6ST1         | heparan sulfate 6-O-sulfotransferase 1                                      | Upregulated |
| A_23_P823 | 0.000743 | 0.0000397 | 4.75 | BBS9           | Bardet-Biedl syndrome 9                                                     | Upregulated |
| A_33_P337 | 0.000483 | 4.56E-06  | 4.74 | WAC            | WW domain containing adaptor with coiled-coil                               | Upregulated |
| A_33_P327 | 0.000483 | 1.81E-06  | 4.73 | TRMT10A        | tRNA methyltransferase 10 homolog A (S. cerevisiae)                         | Upregulated |
| A_23_P512 | 0.000483 | 5.71E-06  | 4.73 | ZNF436         | zinc finger protein 436                                                     | Upregulated |
| A_23_P138 | 0.000954 | 0.0000705 | 4.73 | STYK1          | serine/threonine/tyrosine kinase 1                                          | Upregulated |
| A_22_P000 | 0.001178 | 0.000114  | 4.72 | LOC643339      | uncharacterized LOC643339                                                   | Upregulated |
| A_23_P662 | 0.000483 | 1.78E-06  | 4.7  | MT1M           | metallothionein 1M                                                          | Upregulated |
| A_22_P000 | 0.000525 | 0.000011  | 4.7  | lnc-SGSM2-1    | lnc-SGSM2-1:1                                                               | Upregulated |
| A_23_P904 | 0.000588 | 0.0000204 | 4.7  | PBX4           | pre-B-cell leukemia homeobox 4                                              | Upregulated |
| A_24_P341 | 0.000765 | 0.0000425 | 4.7  | GBA2           | glucosidase, beta (bile acid) 2                                             | Upregulated |
| A_33_P339 | 0.000483 | 3.25E-06  | 4.69 | C17orf96       | chromosome 17 open reading frame 96                                         | Upregulated |
| A_21_P000 | 0.000526 | 0.0000127 | 4.69 | lnc-C1orf21-3  | lnc-C1orf21-3:1                                                             | Upregulated |
| A_33_P326 | 0.000483 | 2.26E-06  | 4.68 | SNX1           | sorting nexin 1                                                             | Upregulated |
| A_23_P459 | 0.000483 | 4.42E-06  | 4.68 | TFB2M          | transcription factor B2, mitochondrial                                      | Upregulated |
| A_22_P000 | 0.000497 | 0.0000076 | 4.68 | lnc-C10orf103  | lnc-C10orf103-1:1                                                           | Upregulated |
| A_24_P113 | 0.000483 | 1.95E-06  | 4.67 | ATAD5          | ATPase family, AAA domain containing 5                                      | Upregulated |

|           |          |           |      |                |                                                                            |             |
|-----------|----------|-----------|------|----------------|----------------------------------------------------------------------------|-------------|
| A_33_P337 | 0.000483 | 1.95E-06  | 4.67 | ENSA           | endosulfine alpha                                                          | Upregulated |
| A_23_P991 | 0.00076  | 0.0000416 | 4.67 | CCDC77         | coiled-coil domain containing 77                                           | Upregulated |
| A_23_P161 | 0.001092 | 0.0000975 | 4.67 | FOSL1          | FOS-like antigen 1                                                         | Upregulated |
| A_23_P111 | 0.000483 | 1.81E-06  | 4.64 | HSPA1A         | heat shock 70kDa protein 1A                                                | Upregulated |
| A_33_P323 | 0.000525 | 0.0000115 | 4.64 | STK3           | serine/threonine kinase 3                                                  | Upregulated |
| A_32_P904 | 0.000483 | 4.86E-06  | 4.63 | STXBP4         | syntaxin binding protein 4                                                 | Upregulated |
| A_23_P200 | 0.000537 | 0.0000138 | 4.63 | HILPDA         | hypoxia inducible lipid droplet-associated                                 | Upregulated |
| A_23_P120 | 0.000483 | 2.96E-06  | 4.62 | ACSS1          | acyl-CoA synthetase short-chain family member 1                            | Upregulated |
| A_23_P353 | 0.000483 | 3.23E-06  | 4.61 | C2CD2L         | C2CD2-like                                                                 | Upregulated |
| A_23_P145 | 0.000526 | 0.0000124 | 4.61 | STAG3          | stromal antigen 3                                                          | Upregulated |
| A_23_P163 | 0.001088 | 0.0000968 | 4.61 | POLE2          | polymerase (DNA directed), epsilon 2, accessory subunit                    | Upregulated |
| A_23_P152 | 0.000483 | 2.56E-06  | 4.6  | PLEKHM1        | pleckstrin homology domain containing, family M (with RUN domain) member 1 | Upregulated |
| A_23_P151 | 0.000695 | 0.0000313 | 4.6  | C12orf43       | chromosome 12 open reading frame 43                                        | Upregulated |
| A_23_P665 | 0.002044 | 0.000313  | 4.6  | SMG8           | SMG8 nonsense mediated mRNA decay factor                                   | Upregulated |
| A_22_P000 | 0.001108 | 0.000101  | 4.59 | lnc-ERH-1      | lnc-ERH-1:1                                                                | Upregulated |
| A_23_P421 | 0.000483 | 2.49E-06  | 4.58 | FAM83H         | family with sequence similarity 83, member H                               | Upregulated |
| A_33_P335 | 0.000662 | 0.0000279 | 4.58 | TXNRD1         | thioredoxin reductase 1                                                    | Upregulated |
| A_33_P330 | 0.000483 | 1.75E-06  | 4.57 | DOPEY1         | dopey family member 1                                                      | Upregulated |
| A_33_P331 | 0.000483 | 0.0000064 | 4.56 | IMMT           | inner membrane protein, mitochondrial                                      | Upregulated |
| A_23_P145 | 0.000486 | 7.16E-06  | 4.56 | PPP1R17        | protein phosphatase 1, regulatory subunit 17                               | Upregulated |
| A_24_P873 | 0.000515 | 9.22E-06  | 4.56 | BCR            | breakpoint cluster region                                                  | Upregulated |
| A_21_P001 | 0.000625 | 0.0000246 | 4.56 | lnc-MAPK8IP2   | lnc-MAPK8IP2-1:12                                                          | Upregulated |
| A_33_P335 | 0.001957 | 0.000289  | 4.56 | SARS           | seryl-tRNA synthetase                                                      | Upregulated |
| A_21_P000 | 0.000483 | 2.31E-06  | 4.55 | MT1E           | metallothionein 1E                                                         | Upregulated |
| A_23_P202 | 0.000515 | 0.0000094 | 4.54 | KBTBD4         | kelch repeat and BTB (POZ) domain containing 4                             | Upregulated |
| A_23_P349 | 0.000527 | 0.0000129 | 4.53 | FCHO2          | FCH domain only 2                                                          | Upregulated |
| A_23_P340 | 0.000538 | 0.0000143 | 4.53 | THAP3          | THAP domain containing, apoptosis associated protein 3                     | Upregulated |
| A_23_P144 | 0.000741 | 0.0000394 | 4.53 | PDLIM7         | PDZ and LIM domain 7 (enigma)                                              | Upregulated |
| A_33_P324 | 0.00219  | 0.000352  | 4.53 | CCNE2          | cyclin E2                                                                  | Upregulated |
| A_24_P816 | 0.003373 | 0.00068   | 4.53 | UBE2Q2P1       | ubiquitin-conjugating enzyme E2Q family member 2 pseudogene 1              | Upregulated |
| A_22_P000 | 0.000483 | 2.55E-06  | 4.52 | lnc-SPAG1-3    | lnc-SPAG1-3:4                                                              | Upregulated |
| A_32_P602 | 0.000483 | 1.96E-06  | 4.51 | ING5           | inhibitor of growth family, member 5                                       | Upregulated |
| A_23_P131 | 0.000483 | 3.79E-06  | 4.51 | CD302          | CD302 molecule                                                             | Upregulated |
| A_33_P342 | 0.000483 | 0.0000046 | 4.51 | XLOC_l2_000407 |                                                                            | Upregulated |
| A_22_P000 | 0.000526 | 0.0000126 | 4.51 | lnc-RSPRY1-1   | lnc-RSPRY1-1:1                                                             | Upregulated |
| A_21_P000 | 0.000765 | 0.0000423 | 4.51 | lnc-AL035696   | lnc-AL035696.1-5:1                                                         | Upregulated |
| A_33_P333 | 0.000483 | 2.02E-06  | 4.5  | NRARP          | NOTCH-regulated ankyrin repeat protein                                     | Upregulated |

|           |          |           |      |               |                                                                       |             |
|-----------|----------|-----------|------|---------------|-----------------------------------------------------------------------|-------------|
| A_23_P698 | 0.000483 | 2.22E-06  | 4.5  | ZNF717        | zinc finger protein 717                                               | Upregulated |
| A_21_P000 | 0.000486 | 7.17E-06  | 4.5  | lnc-HERPUD2   | lnc-HERPUD2-4:1                                                       | Upregulated |
| A_33_P332 | 0.000485 | 0.0000065 | 4.49 | TOMM34        | translocase of outer mitochondrial membrane 34                        | Upregulated |
| A_33_P333 | 0.000515 | 9.49E-06  | 4.48 | MOSPD1        | motile sperm domain containing 1                                      | Upregulated |
| A_33_P332 | 0.000687 | 0.0000302 | 4.48 | PLAGL2        | pleiomorphic adenoma gene-like 2                                      | Upregulated |
| A_32_P197 | 0.002351 | 0.000391  | 4.47 | EIF2A         | eukaryotic translation initiation factor 2A, 65kDa                    | Upregulated |
| A_23_P151 | 0.00321  | 0.000633  | 4.47 | TMEM132C      | transmembrane protein 132C                                            | Upregulated |
| A_24_P898 | 0.000485 | 6.51E-06  | 4.46 | TRAF1         | TNF receptor-associated factor 1                                      | Upregulated |
| A_33_P329 | 0.000483 | 3.67E-06  | 4.45 | LOC1005055    | uncharacterized LOC100505530                                          | Upregulated |
| A_33_P325 | 0.000525 | 0.0000115 | 4.45 | DOCK9         | dedicator of cytokinesis 9                                            | Upregulated |
| A_32_P538 | 0.000625 | 0.0000246 | 4.45 | PAQR7         | progesterone and adiponectin receptor family member VII               | Upregulated |
| A_23_P162 | 0.000925 | 0.0000652 | 4.44 | KLK1          | kallikrein 1                                                          | Upregulated |
| A_21_P001 | 0.000526 | 0.0000117 | 4.43 | lnc-KIF3A-1   | lnc-KIF3A-1:4                                                         | Upregulated |
| A_33_P337 | 0.000498 | 7.73E-06  | 4.42 | SESTD1        | SEC14 and spectrin domains 1                                          | Upregulated |
| A_24_P231 | 0.000515 | 9.86E-06  | 4.42 | GIGYF1        | GRB10 interacting GYF protein 1                                       | Upregulated |
| A_33_P321 | 0.000483 | 2.16E-06  | 4.41 | CAB39L        | calcium binding protein 39-like                                       | Upregulated |
| A_24_P253 | 0.000483 | 3.13E-06  | 4.41 | PIGL          | phosphatidylinositol glycan anchor biosynthesis, class L              | Upregulated |
| A_33_P333 | 0.000646 | 0.0000265 | 4.41 | LCORL         | ligand dependent nuclear receptor corepressor-like                    | Upregulated |
| A_22_P000 | 0.000483 | 5.63E-06  | 4.39 | STX18-AS1     | STX18 antisense RNA 1 (head to head)                                  | Upregulated |
| A_22_P000 | 0.000522 | 0.0000108 | 4.39 | LOC1027237    | uncharacterized LOC102723766                                          | Upregulated |
| A_22_P000 | 0.000486 | 6.67E-06  | 4.38 | SLCO5A1       | solute carrier organic anion transporter family, member 5A1           | Upregulated |
| A_23_P973 | 0.000483 | 3.36E-06  | 4.37 | CASP9         | caspase 9, apoptosis-related cysteine peptidase                       | Upregulated |
| A_23_P630 | 0.000806 | 0.0000485 | 4.37 | MSTO1         | misato 1, mitochondrial distribution and morphology regulator         | Upregulated |
| A_24_P261 | 0.001596 | 0.0002    | 4.37 | MTMR9         | myotubularin related protein 9                                        | Upregulated |
| A_22_P000 | 0.000483 | 0.0000019 | 4.36 | lnc-MBOAT1-1  | lnc-MBOAT1-5:1                                                        | Upregulated |
| A_23_P503 | 0.000521 | 0.0000104 | 4.36 | LGALS13       | lectin, galactoside-binding, soluble, 13                              | Upregulated |
| A_24_P944 | 0.000487 | 7.23E-06  | 4.33 | KLHL6         | kelch-like family member 6                                            | Upregulated |
| A_33_P340 | 0.000577 | 0.000018  | 4.33 | ST8SIA6       | ST8 alpha-N-acetyl-neuraminidase alpha-2,8-sialyltransferase 6        | Upregulated |
| A_24_P941 | 0.000483 | 1.96E-06  | 4.32 | HAUS6         | HAUS augmin-like complex, subunit 6                                   | Upregulated |
| A_33_P340 | 0.000515 | 9.49E-06  | 4.32 | PPM1F         | protein phosphatase, Mg <sup>2+</sup> /Mn <sup>2+</sup> dependent, 1F | Upregulated |
| A_22_P000 | 0.000979 | 0.0000755 | 4.32 | lnc-TP53I11-1 | lnc-TP53I11-5:1                                                       | Upregulated |
| A_23_P268 | 0.000513 | 0.0000089 | 4.31 | SOX9          | SRY (sex determining region Y)-box 9                                  | Upregulated |
| A_23_P135 | 0.000525 | 0.0000111 | 4.31 | ZNF627        | zinc finger protein 627                                               | Upregulated |
| A_21_P000 | 0.000483 | 2.45E-06  | 4.3  | LOC1019295    | uncharacterized LOC101929506                                          | Upregulated |
| A_24_P415 | 0.000483 | 3.52E-06  | 4.3  | SEC61A2       | Sec61 alpha 2 subunit ( <i>S. cerevisiae</i> )                        | Upregulated |
| A_33_P326 | 0.0011   | 0.0000993 | 4.3  | MTMR7         | myotubularin related protein 7                                        | Upregulated |
| A_23_P151 | 0.000525 | 0.0000115 | 4.29 | CSRNP2        | cysteine-serine-rich nuclear protein 2                                | Upregulated |

|           |          |           |      |              |                                                         |             |
|-----------|----------|-----------|------|--------------|---------------------------------------------------------|-------------|
| A_23_P102 | 0.000559 | 0.0000155 | 4.29 | NUP35        | nucleoporin 35kDa                                       | Upregulated |
| A_24_P148 | 0.001105 | 0.0001    | 4.29 | SH3BP5       | SH3-domain binding protein 5 (BTK-associated)           | Upregulated |
| A_22_P000 | 0.00308  | 0.000591  | 4.29 | lnc-STAT3-1  | lnc-STAT3-1:1                                           | Upregulated |
| A_32_P250 | 0.000483 | 3.44E-06  | 4.28 | RDH10        | retinol dehydrogenase 10 (all-trans)                    | Upregulated |
| A_23_P453 | 0.000498 | 7.84E-06  | 4.28 | XK           | X-linked Kx blood group                                 | Upregulated |
| A_33_P331 | 0.001121 | 0.000104  | 4.28 | MIR17HG      | miR-17-92 cluster host gene (non-protein coding)        | Upregulated |
| A_24_P358 | 0.001035 | 0.0000858 | 4.27 | GPATCH11     | G patch domain containing 11                            | Upregulated |
| A_23_P635 | 0.003109 | 0.000602  | 4.27 | PMF1         | polyamine-modulated factor 1                            | Upregulated |
| A_23_P132 | 0.000483 | 5.72E-06  | 4.26 | FAM114A1     | family with sequence similarity 114, member A1          | Upregulated |
| A_32_P151 | 0.000526 | 0.0000118 | 4.26 | ZNF398       | zinc finger protein 398                                 | Upregulated |
| A_19_P003 | 0.000483 | 2.14E-06  | 4.25 | PTPN14       | protein tyrosine phosphatase, non-receptor type 14      | Upregulated |
| A_21_P000 | 0.001004 | 0.0000805 | 4.25 | lnc-UBLCP1-8 | lnc-UBLCP1-8:1                                          | Upregulated |
| A_33_P327 | 0.002535 | 0.000439  | 4.25 | DIS3L2       | DIS3 like 3'-5' exoribonuclease 2                       | Upregulated |
| A_33_P323 | 0.000521 | 0.0000106 | 4.24 | MINOS1-NBL   | MINOS1-NBL1 readthrough                                 | Upregulated |
| A_24_P630 | 0.000565 | 0.0000169 | 4.24 | IL1R2        | interleukin 1 receptor, type II                         | Upregulated |
| A_24_P294 | 0.00071  | 0.0000353 | 4.24 | SYNJ2        | synaptojanin 2                                          | Upregulated |
| A_22_P000 | 0.000483 | 5.12E-06  | 4.23 | lnc-NGDN-1   | lnc-NGDN-1:1                                            | Upregulated |
| A_33_P320 | 0.000855 | 0.0000554 | 4.23 | ZNF345       | zinc finger protein 345                                 | Upregulated |
| A_33_P373 | 0.001103 | 0.0000998 | 4.23 | LOC1005062   | uncharacterized LOC100506282                            | Upregulated |
| A_22_P000 | 0.001346 | 0.000147  | 4.23 | lnc-RIC8A-1  | lnc-RIC8A-1:1                                           | Upregulated |
| A_23_P277 | 0.001394 | 0.000157  | 4.23 | SPINT2       | serine peptidase inhibitor, Kunitz type, 2              | Upregulated |
| A_24_P194 | 0.000483 | 2.23E-06  | 4.22 | CCDC134      | coiled-coil domain containing 134                       | Upregulated |
| A_24_P944 | 0.000752 | 0.0000408 | 4.22 | TMTC3        | transmembrane and tetratricopeptide repeat containing 3 | Upregulated |
| A_33_P328 | 0.001687 | 0.000221  | 4.22 | RNPC3        | RNA-binding region (RNP1, RRM) containing 3             | Upregulated |
| A_23_P709 | 0.000483 | 2.75E-06  | 4.21 | AGA          | aspartylglucosaminidase                                 | Upregulated |
| A_24_P376 | 0.000483 | 2.97E-06  | 4.21 | CCNL2        | cyclin L2                                               | Upregulated |
| A_23_P157 | 0.000515 | 9.87E-06  | 4.21 | AP4M1        | adaptor-related protein complex 4, mu 1 subunit         | Upregulated |
| A_33_P326 | 0.00064  | 0.0000259 | 4.21 | FZR1         | fizzy/cell division cycle 20 related 1 (Drosophila)     | Upregulated |
| A_23_P447 | 0.000483 | 2.71E-06  | 4.2  | CSRP2        | cysteine and glycine-rich protein 2                     | Upregulated |
| A_24_P528 | 0.000483 | 2.92E-06  | 4.2  | ENDOU        | endonuclease, polyU-specific                            | Upregulated |
| A_33_P331 | 0.000483 | 3.22E-06  | 4.2  | MTERF4       | mitochondrial transcription termination factor 4        | Upregulated |
| A_22_P000 | 0.000945 | 0.0000691 | 4.2  | LOC1019272   | uncharacterized LOC101927257                            | Upregulated |
| A_24_P106 | 0.000995 | 0.000079  | 4.2  | WDR36        | WD repeat domain 36                                     | Upregulated |
| A_23_P377 | 0.000883 | 0.0000591 | 4.19 | CIRBP        | cold inducible RNA binding protein                      | Upregulated |
| A_33_P339 | 0.001459 | 0.000172  | 4.19 | IL4          | interleukin 4                                           | Upregulated |
| A_22_P000 | 0.000483 | 3.79E-06  | 4.17 | lnc-VPRBP-1  | lnc-VPRBP-1:1                                           | Upregulated |
| A_19_P008 | 0.000526 | 0.0000126 | 4.17 | OTUD6B-AS1   | OTUD6B antisense RNA 1 (head to head)                   | Upregulated |



|           |          |           |      |             |                                                                                    |             |
|-----------|----------|-----------|------|-------------|------------------------------------------------------------------------------------|-------------|
| A_23_P301 | 0.00056  | 0.0000165 | 4.17 | MED27       | mediator complex subunit 27                                                        | Upregulated |
| A_23_P193 | 0.000575 | 0.0000177 | 4.17 | LRRC16A     | leucine rich repeat containing 16A                                                 | Upregulated |
| A_21_P000 | 0.000752 | 0.0000408 | 4.17 | SNORA29     | small nucleolar RNA, H/ACA box 29                                                  | Upregulated |
| A_22_P000 | 0.001955 | 0.000288  | 4.17 | LLPH-AS1    | LLPH antisense RNA 1 (head to head)                                                | Upregulated |
| A_21_P000 | 0.000695 | 0.0000315 | 4.16 | lnc-ASMT-5  | lnc-ASMT-5:1                                                                       | Upregulated |
| A_33_P325 | 0.000908 | 0.0000628 | 4.16 | NSG1        | neuron specific gene family member 1                                               | Upregulated |
| A_21_P000 | 0.000908 | 0.0000628 | 4.16 | SNORA21     | small nucleolar RNA, H/ACA box 21                                                  | Upregulated |
| A_33_P329 | 0.000598 | 0.0000214 | 4.15 | MYO1E       | myosin IE                                                                          | Upregulated |
| A_24_P374 | 0.000925 | 0.0000653 | 4.15 | PDK1        | pyruvate dehydrogenase kinase, isozyme 1                                           | Upregulated |
| A_33_P329 | 0.000483 | 2.61E-06  | 4.14 | MRPL37      | mitochondrial ribosomal protein L37                                                | Upregulated |
| A_23_P255 | 0.000483 | 6.29E-06  | 4.14 | PAFAH1B2    | platelet-activating factor acetylhydrolase 1b, catalytic subunit 2 (30kDa)         | Upregulated |
| A_24_P314 | 0.000483 | 2.41E-06  | 4.12 | TUBB2B      | tubulin, beta 2B class IIb                                                         | Upregulated |
| A_33_P336 | 0.000516 | 0.00001   | 4.12 | SCARNA10    | small Cajal body-specific RNA 10                                                   | Upregulated |
| A_23_P895 | 0.000516 | 0.0000101 | 4.12 | KIAA0753    | KIAA0753                                                                           | Upregulated |
| A_24_P393 | 0.001142 | 0.000108  | 4.12 | DNAJB4      | DnaJ (Hsp40) homolog, subfamily B, member 4                                        | Upregulated |
| A_21_P000 | 0.000498 | 7.88E-06  | 4.11 | lnc-TMEM116 | lnc-TMEM116-1:1                                                                    | Upregulated |
| A_33_P322 | 0.000532 | 0.0000133 | 4.11 | ID4         | inhibitor of DNA binding 4, dominant negative helix-loop-helix protein             | Upregulated |
| A_24_P933 | 0.001346 | 0.000147  | 4.11 | ABI2        | abl-interactor 2                                                                   | Upregulated |
| A_23_P650 | 0.000709 | 0.0000349 | 4.1  | EID3        | EP300 interacting inhibitor of differentiation 3                                   | Upregulated |
| A_24_P940 | 0.000909 | 0.000063  | 4.1  | CNOT6       | CCR4-NOT transcription complex, subunit 6                                          | Upregulated |
| A_23_P139 | 0.003147 | 0.000612  | 4.1  | SLC11A2     | solute carrier family 11 (proton-coupled divalent metal ion transporter), member 2 | Upregulated |
| A_33_P322 | 0.00058  | 0.0000196 | 4.09 | ARHGAP26    | Rho GTPase activating protein 26                                                   | Upregulated |
| A_24_P212 | 0.00069  | 0.0000304 | 4.09 | C9orf156    | chromosome 9 open reading frame 156                                                | Upregulated |
| A_23_P131 | 0.001385 | 0.000154  | 4.09 | UBXN2A      | UBX domain protein 2A                                                              | Upregulated |
| A_22_P000 | 0.003481 | 0.000712  | 4.09 | lnc-SDF2-1  | lnc-SDF2-1:1                                                                       | Upregulated |
| A_23_P217 | 0.000486 | 6.81E-06  | 4.08 | DCAF10      | DDB1 and CUL4 associated factor 10                                                 | Upregulated |
| A_33_P328 | 0.000504 | 8.58E-06  | 4.08 | SLTM        | SAFB-like, transcription modulator                                                 | Upregulated |
| A_23_P698 | 0.000525 | 0.0000114 | 4.07 | AGPAT9      | 1-acylglycerol-3-phosphate O-acyltransferase 9                                     | Upregulated |
| A_22_P000 | 0.000534 | 0.0000135 | 4.07 | TAPT1-AS1   | TAPT1 antisense RNA 1 (head to head)                                               | Upregulated |
| A_21_P000 | 0.000592 | 0.0000208 | 4.07 | LINC00278   | long intergenic non-protein coding RNA 278                                         | Upregulated |
| A_23_P795 | 0.0027   | 0.000483  | 4.07 | IL1B        | interleukin 1, beta                                                                | Upregulated |
| A_21_P001 | 0.000483 | 2.66E-06  | 4.06 | CLCN3       | chloride channel, voltage-sensitive 3                                              | Upregulated |
| A_22_P000 | 0.000526 | 0.0000118 | 4.06 | lnc-CCDC7-2 | lnc-CCDC7-2:1                                                                      | Upregulated |
| A_23_P375 | 0.00056  | 0.0000163 | 4.06 | NPTN        | neuroplastin                                                                       | Upregulated |
| A_33_P323 | 0.000674 | 0.0000291 | 4.06 | MBTD1       | mbt domain containing 1                                                            | Upregulated |
| A_24_P402 | 0.000483 | 6.08E-06  | 4.05 | CRNKL1      | crooked neck pre-mRNA splicing factor 1                                            | Upregulated |
| A_23_P124 | 0.001092 | 0.0000974 | 4.05 | ISY1        | ISY1 splicing factor homolog (S. cerevisiae)                                       | Upregulated |

|           |          |           |      |             |                                                                   |             |
|-----------|----------|-----------|------|-------------|-------------------------------------------------------------------|-------------|
| A_19_P003 | 0.000483 | 3.08E-06  | 4.04 | LOC1019297  | uncharacterized LOC101929709                                      | Upregulated |
| A_23_P123 | 0.000515 | 9.96E-06  | 4.04 | GSTM3       | glutathione S-transferase mu 3 (brain)                            | Upregulated |
| A_33_P321 | 0.000525 | 0.0000113 | 4.04 | AEN         | apoptosis enhancing nuclease                                      | Upregulated |
| A_24_P318 | 0.000537 | 0.0000139 | 4.04 | ZNF337      | zinc finger protein 337                                           | Upregulated |
| A_23_P423 | 0.000702 | 0.000033  | 4.04 | FAM171B     | family with sequence similarity 171, member B                     | Upregulated |
| A_23_P842 | 0.001959 | 0.00029   | 4.04 | OTP         | orthopedia homeobox                                               | Upregulated |
| A_33_P325 | 0.000498 | 7.76E-06  | 4.03 | CNTRL       | centriolin                                                        | Upregulated |
| A_23_P118 | 0.000741 | 0.0000396 | 4.03 | PLK1        | polo-like kinase 1                                                | Upregulated |
| A_33_P323 | 0.001314 | 0.000141  | 4.03 | CCNG1       | cyclin G1                                                         | Upregulated |
| A_33_P341 | 0.003584 | 0.000745  | 4.03 | SLC35F1     | solute carrier family 35, member F1                               | Upregulated |
| A_33_P323 | 0.000483 | 0.0000026 | 4.02 | MT1X        | metallothionein 1X                                                | Upregulated |
| A_23_P111 | 0.000521 | 0.0000102 | 4.01 | SRRT        | serrate, RNA effector molecule                                    | Upregulated |
| A_22_P000 | 0.000746 | 0.0000402 | 4.01 | lnc-CUBN-1  | lnc-CUBN-1:1                                                      | Upregulated |
| A_23_P104 | 0.000701 | 0.0000328 | 4    | SPA17       | sperm autoantigenic protein 17                                    | Upregulated |
| A_22_P000 | 0.000483 | 5.82E-06  | 3.99 | lnc-SPATA17 | lnc-SPATA17-2:1                                                   | Upregulated |
| A_24_P365 | 0.000705 | 0.0000332 | 3.99 | TCF3        | transcription factor 3                                            | Upregulated |
| A_33_P326 | 0.001081 | 0.0000952 | 3.99 | BAD         | BCL2-associated agonist of cell death                             | Upregulated |
| A_33_P326 | 0.002309 | 0.00038   | 3.99 | C5orf49     | chromosome 5 open reading frame 49                                | Upregulated |
| A_33_P337 | 0.000513 | 9.02E-06  | 3.98 | FOXO3       | forkhead box O3                                                   | Upregulated |
| A_22_P000 | 0.000526 | 0.0000122 | 3.98 | SLC38A6     | solute carrier family 38, member 6                                | Upregulated |
| A_23_P347 | 0.000575 | 0.0000177 | 3.98 | COA7        | cytochrome c oxidase assembly factor 7 (putative)                 | Upregulated |
| A_19_P003 | 0.000584 | 0.00002   | 3.98 | lnc-LRIG2-4 | lnc-LRIG2-4:3                                                     | Upregulated |
| A_22_P000 | 0.000604 | 0.0000225 | 3.98 | lnc-RTN2-1  | lnc-RTN2-1:1                                                      | Upregulated |
| A_23_P355 | 0.001341 | 0.000146  | 3.98 | USP54       | ubiquitin specific peptidase 54                                   | Upregulated |
| A_23_P109 | 0.00053  | 0.0000131 | 3.97 | HPS4        | Hermansky-Pudlak syndrome 4                                       | Upregulated |
| A_33_P331 | 0.000542 | 0.0000145 | 3.97 | CA5B        | carbonic anhydrase VB, mitochondrial                              | Upregulated |
| A_33_P327 | 0.000866 | 0.0000572 | 3.97 | THAP9       | THAP domain containing 9                                          | Upregulated |
| A_23_P149 | 0.000629 | 0.0000249 | 3.96 | THEM4       | thioesterase superfamily member 4                                 | Upregulated |
| A_22_P000 | 0.001752 | 0.000237  | 3.96 | CLUAP1      | clusterin associated protein 1                                    | Upregulated |
| A_21_P001 | 0.001162 | 0.000111  | 3.95 | lnc-WDR34-1 | lnc-WDR34-1:1                                                     | Upregulated |
| A_23_P488 | 0.00062  | 0.0000241 | 3.94 | TMOD2       | tropomodulin 2 (neuronal)                                         | Upregulated |
| A_21_P001 | 0.001029 | 0.0000848 | 3.94 | LRRC37BP1   | leucine rich repeat containing 37B pseudogene 1                   | Upregulated |
| A_23_P120 | 0.000515 | 9.44E-06  | 3.93 | HMOX1       | heme oxygenase (decycling) 1                                      | Upregulated |
| A_23_P212 | 0.00056  | 0.0000157 | 3.93 | LARS2       | leucyl-tRNA synthetase 2, mitochondrial                           | Upregulated |
| A_21_P000 | 0.000639 | 0.0000257 | 3.93 | lnc-NLGN4Y- | lnc-NLGN4Y-1:1                                                    | Upregulated |
| A_23_P989 | 0.000483 | 3.84E-06  | 3.92 | CCNT1       | cyclin T1                                                         | Upregulated |
| A_23_P393 | 0.000483 | 4.04E-06  | 3.92 | PDXDC2P     | pyridoxal-dependent decarboxylase domain containing 2, pseudogene | Upregulated |

|           |          |           |      |             |                                                                                     |             |
|-----------|----------|-----------|------|-------------|-------------------------------------------------------------------------------------|-------------|
| A_33_P334 | 0.000701 | 0.0000328 | 3.92 | PLCE1       | phospholipase C, epsilon 1                                                          | Upregulated |
| A_24_P338 | 0.001101 | 0.0000995 | 3.92 | ARL1        | ADP-ribosylation factor-like 1                                                      | Upregulated |
| A_23_P106 | 0.001116 | 0.000102  | 3.92 | SEMA7A      | semaphorin 7A, GPI membrane anchor (John Milton Hagen blood group)                  | Upregulated |
| A_22_P000 | 0.001477 | 0.000175  | 3.92 | lnc-ACOT1-3 | lnc-ACOT1-3:2                                                                       | Upregulated |
| A_24_P349 | 0.000483 | 3.31E-06  | 3.91 | PCDHGA12    | protocadherin gamma subfamily A, 12                                                 | Upregulated |
| A_24_P270 | 0.001925 | 0.00028   | 3.91 | CRK         | v-crk avian sarcoma virus CT10 oncogene homolog                                     | Upregulated |
| A_24_P291 | 0.000603 | 0.0000221 | 3.9  | SYTL3       | synaptotagmin-like 3                                                                | Upregulated |
| A_32_P482 | 0.000707 | 0.0000346 | 3.9  | ZNF100      | zinc finger protein 100                                                             | Upregulated |
| A_24_P185 | 0.000711 | 0.0000356 | 3.9  | UPRT        | uracil phosphoribosyltransferase (FUR1) homolog (S. cerevisiae)                     | Upregulated |
| A_32_P181 | 0.000515 | 9.93E-06  | 3.89 | ST7-AS1     | ST7 antisense RNA 1                                                                 | Upregulated |
| A_23_P128 | 0.000522 | 0.0000108 | 3.89 | BATF        | basic leucine zipper transcription factor, ATF-like                                 | Upregulated |
| A_21_P001 | 0.000526 | 0.0000122 | 3.89 | LOC1019286  | uncharacterized LOC101928658                                                        | Upregulated |
| A_23_P821 | 0.000786 | 0.0000454 | 3.89 | SMPD2       | sphingomyelin phosphodiesterase 2, neutral membrane (neutral sphingomyelinase 2)    | Upregulated |
| A_24_P363 | 0.000577 | 0.0000179 | 3.88 | MAK         | male germ cell-associated kinase                                                    | Upregulated |
| A_33_P342 | 0.000642 | 0.0000262 | 3.88 | ZC3H3       | zinc finger CCCH-type containing 3                                                  | Upregulated |
| A_24_P186 | 0.001328 | 0.000144  | 3.88 | MTERF4      | mitochondrial transcription termination factor 4                                    | Upregulated |
| A_33_P329 | 0.000489 | 7.35E-06  | 3.87 | C17orf53    | chromosome 17 open reading frame 53                                                 | Upregulated |
| A_21_P000 | 0.000527 | 0.000013  | 3.87 | TFAP2A-AS1  | TFAP2A antisense RNA 1                                                              | Upregulated |
| A_33_P322 | 0.000515 | 9.94E-06  | 3.86 | CAAP1       | caspase activity and apoptosis inhibitor 1                                          | Upregulated |
| A_23_P205 | 0.000662 | 0.0000278 | 3.86 | EXD2        | exonuclease 3'-5' domain containing 2                                               | Upregulated |
| A_23_P346 | 0.002226 | 0.000361  | 3.86 | PIK3CB      | phosphatidylinositol-4,5-bisphosphate 3-kinase, catalytic subunit beta              | Upregulated |
| A_24_P232 | 0.000537 | 0.000014  | 3.85 | APBB1IP     | amyloid beta (A4) precursor protein-binding, family B, member 1 interacting protein | Upregulated |
| A_23_P312 | 0.000855 | 0.0000553 | 3.85 | PILRA       | paired immunoglobulin-like type 2 receptor alpha                                    | Upregulated |
| A_23_P504 | 0.000995 | 0.0000786 | 3.85 | KANK2       | KN motif and ankyrin repeat domains 2                                               | Upregulated |
| A_23_P202 | 0.001243 | 0.000128  | 3.85 | CCND1       | cyclin D1                                                                           | Upregulated |
| A_22_P000 | 0.000483 | 3.56E-06  | 3.84 | lnc-ALDH7A1 | lnc-ALDH7A1-1:1                                                                     | Upregulated |
| A_33_P331 | 0.000741 | 0.0000396 | 3.84 | C16orf62    | chromosome 16 open reading frame 62                                                 | Upregulated |
| A_33_P330 | 0.001153 | 0.000109  | 3.84 | LRP6        | low density lipoprotein receptor-related protein 6                                  | Upregulated |
| A_23_P367 | 0.001067 | 0.0000927 | 3.83 | FBXL14      | F-box and leucine-rich repeat protein 14                                            | Upregulated |
| A_23_P397 | 0.000483 | 4.46E-06  | 3.82 | GSTM2       | glutathione S-transferase mu 2 (muscle)                                             | Upregulated |
| A_33_P336 | 0.000771 | 0.0000432 | 3.82 | DNAJB5      | DnaJ (Hsp40) homolog, subfamily B, member 5                                         | Upregulated |
| A_33_P331 | 0.000855 | 0.0000552 | 3.82 | ZNF789      | zinc finger protein 789                                                             | Upregulated |
| A_24_P364 | 0.001163 | 0.000112  | 3.82 | SERGEF      | secretion regulating guanine nucleotide exchange factor                             | Upregulated |
| A_23_P333 | 0.002006 | 0.000302  | 3.82 | TLL1        | tubulin tyrosine ligase-like family member 11                                       | Upregulated |
| A_24_P341 | 0.000483 | 5.09E-06  | 3.81 | SMIM20      | small integral membrane protein 20                                                  | Upregulated |
| A_33_P338 | 0.000486 | 0.0000071 | 3.81 | KIF26B      | kinesin family member 26B                                                           | Upregulated |
| A_23_P140 | 0.000709 | 0.0000349 | 3.81 | ZNF263      | zinc finger protein 263                                                             | Upregulated |

|           |          |           |      |                                                                         |             |
|-----------|----------|-----------|------|-------------------------------------------------------------------------|-------------|
| A_22_P000 | 0.001181 | 0.000115  | 3.81 | lnc-C6orf228- lnc-C6orf228-3:1                                          | Upregulated |
| A_33_P338 | 0.000846 | 0.0000539 | 3.8  | ELK1 ELK1, member of ETS oncogene family                                | Upregulated |
| A_24_P405 | 0.00056  | 0.0000157 | 3.79 | TRIP6 thyroid hormone receptor interactor 6                             | Upregulated |
| A_23_P433 | 0.000697 | 0.0000319 | 3.79 | OR7E91P olfactory receptor, family 7, subfamily E, member 91 pseudogene | Upregulated |
| A_24_P101 | 0.000537 | 0.000014  | 3.78 | EXOC5 exocyst complex component 5                                       | Upregulated |
| A_33_P336 | 0.000577 | 0.0000182 | 3.78 | lnc-COPZ2-1 lnc-COPZ2-1:1                                               | Upregulated |
| A_33_P339 | 0.000483 | 3.53E-06  | 3.77 | PLSCR3 phospholipid scramblase 3                                        | Upregulated |
| A_33_P321 | 0.000513 | 0.0000089 | 3.77 | LNP1 leukemia NUP98 fusion partner 1                                    | Upregulated |
| A_33_P337 | 0.001085 | 0.0000958 | 3.77 | LOC1001332 GAL11870                                                     | Upregulated |
| A_23_P339 | 0.002128 | 0.000337  | 3.77 | LIN52 lin-52 DREAM MuvB core complex component                          | Upregulated |
| A_23_P122 | 0.000483 | 3.27E-06  | 3.76 | MCOLN3 mucolipin 3                                                      | Upregulated |
| A_23_P364 | 0.000575 | 0.0000178 | 3.76 | VPS33A vacuolar protein sorting 33 homolog A (S. cerevisiae)            | Upregulated |
| A_33_P344 | 0.000577 | 0.0000182 | 3.76 | lnc-WDR1-1 lnc-WDR1-1:2                                                 | Upregulated |
| A_23_P218 | 0.000483 | 0.0000038 | 3.75 | CPT1B carnitine palmitoyltransferase 1B (muscle)                        | Upregulated |
| A_23_P159 | 0.000515 | 9.79E-06  | 3.75 | BEX1 brain expressed, X-linked 1                                        | Upregulated |
| A_33_P340 | 0.001094 | 0.0000977 | 3.75 | CTNNA1 catenin (cadherin-associated protein), alpha 1, 102kDa           | Upregulated |
| A_23_P642 | 0.001542 | 0.000189  | 3.75 | ZW10 zw10 kinetochore protein                                           | Upregulated |
| A_22_P000 | 0.000483 | 0.0000064 | 3.74 | lnc-RBMS1-2 lnc-RBMS1-2:1                                               | Upregulated |
| A_33_P333 | 0.000512 | 8.82E-06  | 3.74 | TTL5 tubulin tyrosine ligase-like family member 5                       | Upregulated |
| A_33_P325 | 0.000675 | 0.0000293 | 3.74 | ZNF286B zinc finger protein 286B                                        | Upregulated |
| A_23_P218 | 0.003175 | 0.000622  | 3.74 | ZNF343 zinc finger protein 343                                          | Upregulated |
| A_33_P340 | 0.00096  | 0.0000715 | 3.73 | NAV1 neuron navigator 1                                                 | Upregulated |
| A_24_P164 | 0.001798 | 0.000248  | 3.73 | DSCR3 Down syndrome critical region 3                                   | Upregulated |
| A_23_P116 | 0.00058  | 0.0000196 | 3.71 | USP1 ubiquitin specific peptidase 1                                     | Upregulated |
| A_23_P837 | 0.003258 | 0.000646  | 3.71 | ING2 inhibitor of growth family, member 2                               | Upregulated |
| A_24_P479 | 0.003295 | 0.000658  | 3.71 | UBE2QL1 ubiquitin-conjugating enzyme E2Q family-like 1                  | Upregulated |
| A_21_P001 | 0.000483 | 4.06E-06  | 3.7  | XLOC_I2_013457                                                          | Upregulated |
| A_23_P129 | 0.000483 | 4.24E-06  | 3.7  | CALML4 calmodulin-like 4                                                | Upregulated |
| A_33_P322 | 0.000525 | 0.0000115 | 3.7  | LINC01347 long intergenic non-protein coding RNA 1347                   | Upregulated |
| A_21_P001 | 0.002907 | 0.00054   | 3.7  | SMAD1-AS2 SMAD1 antisense RNA 2                                         | Upregulated |
| A_33_P325 | 0.000809 | 0.000049  | 3.69 | ATG2A autophagy related 2A                                              | Upregulated |
| A_22_P000 | 0.001084 | 0.0000955 | 3.69 | lnc-DPY19L2- lnc-DPY19L2-1:1                                            | Upregulated |
| A_24_P101 | 0.001496 | 0.00018   | 3.69 | THADA thyroid adenoma associated                                        | Upregulated |
| A_33_P329 | 0.000483 | 4.32E-06  | 3.68 | PPIH peptidylprolyl isomerase H (cyclophilin H)                         | Upregulated |
| A_22_P000 | 0.000502 | 8.46E-06  | 3.68 | PDK3 pyruvate dehydrogenase kinase, isozyme 3                           | Upregulated |
| A_22_P000 | 0.00093  | 0.000066  | 3.68 | GNG12-AS1 GNG12 antisense RNA 1                                         | Upregulated |
| A_33_P327 | 0.002221 | 0.000359  | 3.68 | AKAP14 A kinase (PRKA) anchor protein 14                                | Upregulated |

|           |          |           |      |                |                                                                           |             |
|-----------|----------|-----------|------|----------------|---------------------------------------------------------------------------|-------------|
| A_22_P000 | 0.007055 | 0.00199   | 3.68 | FSIP1          | fibrous sheath interacting protein 1                                      | Upregulated |
| A_23_P338 | 0.000483 | 4.91E-06  | 3.67 | MAGED2         | melanoma antigen family D, 2                                              | Upregulated |
| A_23_P142 | 0.000483 | 5.93E-06  | 3.67 | ZFYVE21        | zinc finger, FYVE domain containing 21                                    | Upregulated |
| A_23_P102 | 0.000973 | 0.0000746 | 3.67 | WNT10A         | wingless-type MMTV integration site family, member 10A                    | Upregulated |
| A_24_P177 | 0.001605 | 0.000203  | 3.67 | PCDHGB8P       | protocadherin gamma subfamily B, 8 pseudogene                             | Upregulated |
| A_33_P326 | 0.002945 | 0.000551  | 3.67 | DDRGK1         | DDRGK domain containing 1                                                 | Upregulated |
| A_23_P169 | 0.000537 | 0.0000142 | 3.66 | TRUB2          | TruB pseudouridine (psi) synthase family member 2                         | Upregulated |
| A_24_P241 | 0.002508 | 0.000432  | 3.66 | ZNF160         | zinc finger protein 160                                                   | Upregulated |
| A_21_P001 | 0.002788 | 0.000507  | 3.66 | FBXO25         | F-box protein 25                                                          | Upregulated |
| A_22_P000 | 0.000483 | 0.0000056 | 3.65 | lnc-HIST4H4-   | lnc-HIST4H4-1:1                                                           | Upregulated |
| A_32_P192 | 0.000483 | 0.0000058 | 3.65 | GLT1D1         | glycosyltransferase 1 domain containing 1                                 | Upregulated |
| A_23_P591 | 0.000887 | 0.0000598 | 3.65 | RXRβ           | retinoid X receptor, beta                                                 | Upregulated |
| A_23_P680 | 0.001002 | 0.0000803 | 3.65 | PCGF1          | polycomb group ring finger 1                                              | Upregulated |
| A_21_P000 | 0.00213  | 0.000337  | 3.64 | LOC1019272     | uncharacterized LOC101927252                                              | Upregulated |
| A_23_P705 | 0.000483 | 4.55E-06  | 3.63 | VPS52          | vacuolar protein sorting 52 homolog (S. cerevisiae)                       | Upregulated |
| A_23_P167 | 0.000589 | 0.0000204 | 3.63 | PAQR3          | progesterone and adiponectin receptor family member III                   | Upregulated |
| A_23_P184 | 0.000701 | 0.0000326 | 3.63 | CXCL9          | chemokine (C-X-C motif) ligand 9                                          | Upregulated |
| A_23_P144 | 0.000848 | 0.0000542 | 3.63 | GNPDA1         | glucosamine-6-phosphate deaminase 1                                       | Upregulated |
| A_33_P340 | 0.001637 | 0.000211  | 3.63 | SERINC4        | serine incorporator 4                                                     | Upregulated |
| A_23_P668 | 0.005125 | 0.00126   | 3.63 | SIRT7          | sirtuin 7                                                                 | Upregulated |
| A_23_P894 | 0.000483 | 3.86E-06  | 3.62 | SLC35B1        | solute carrier family 35, member B1                                       | Upregulated |
| A_23_P112 | 0.001517 | 0.000184  | 3.62 | TRIM32         | tripartite motif containing 32                                            | Upregulated |
| A_32_P717 | 0.000483 | 5.44E-06  | 3.61 | FKBP4          | FK506 binding protein 4, 59kDa                                            | Upregulated |
| A_33_P329 | 0.000521 | 0.0000106 | 3.61 | ST8SIA4        | ST8 alpha-N-acetylneuraminidase alpha-2,8-sialyltransferase 4             | Upregulated |
| A_21_P001 | 0.000578 | 0.0000191 | 3.61 | XLOC_I2_015213 |                                                                           | Upregulated |
| A_21_P001 | 0.000096 | 0.0000717 | 3.61 | MTHFD1L        | methylenetetrahydrofolate dehydrogenase (NADP+ dependent) 1-like          | Upregulated |
| A_23_P771 | 0.001297 | 0.000138  | 3.61 | SORD           | sorbitol dehydrogenase                                                    | Upregulated |
| A_22_P000 | 0.001453 | 0.000171  | 3.61 | lnc-HMHB1-3    | lnc-HMHB1-3:1                                                             | Upregulated |
| A_33_P334 | 0.000945 | 0.0000689 | 3.6  | TBL1X          | transducin (beta)-like 1X-linked                                          | Upregulated |
| A_32_P118 | 0.001323 | 0.000143  | 3.6  | C12orf65       | chromosome 12 open reading frame 65                                       | Upregulated |
| A_33_P335 | 0.001943 | 0.000284  | 3.6  | SMARCAD1       | SWI/SNF-related, matrix-associated actin-dependent regulator of chromatin | Upregulated |
| A_23_P206 | 0.000483 | 4.05E-06  | 3.59 | MT1E           | metallothionein 1E                                                        | Upregulated |
| A_19_P008 | 0.000848 | 0.0000544 | 3.59 | XLOC_I2_014579 |                                                                           | Upregulated |
| A_22_P000 | 0.000483 | 4.11E-06  | 3.58 | PPP3CB-AS1     | PPP3CB antisense RNA 1 (head to head)                                     | Upregulated |
| A_22_P000 | 0.000515 | 9.54E-06  | 3.58 | lnc-PPP4R1-5   | lnc-PPP4R1-5:1                                                            | Upregulated |
| A_22_P000 | 0.001262 | 0.000132  | 3.58 | lnc-OIT3-1     | lnc-OIT3-1:1                                                              | Upregulated |
| A_24_P468 | 0.001475 | 0.000175  | 3.58 | RBBP4          | retinoblastoma binding protein 4                                          | Upregulated |

|           |          |           |      |             |                                                               |             |
|-----------|----------|-----------|------|-------------|---------------------------------------------------------------|-------------|
| A_23_P109 | 0.00062  | 0.0000241 | 3.57 | THOC5       | THO complex 5                                                 | Upregulated |
| A_33_P331 | 0.000945 | 0.0000691 | 3.57 | MYB         | v-myb avian myeloblastosis viral oncogene homolog             | Upregulated |
| A_23_P358 | 0.001046 | 0.0000878 | 3.57 | POU5F2      | POU domain class 5, transcription factor 2                    | Upregulated |
| A_33_P332 | 0.002989 | 0.000564  | 3.57 | RNF216      | ring finger protein 216                                       | Upregulated |
| A_33_P329 | 0.000483 | 4.23E-06  | 3.56 | KCTD9       | potassium channel tetramerization domain containing 9         | Upregulated |
| A_23_P778 | 0.000601 | 0.0000218 | 3.56 | TMEM88      | transmembrane protein 88                                      | Upregulated |
| A_23_P112 | 0.001386 | 0.000155  | 3.56 | GNG10       | guanine nucleotide binding protein (G protein), gamma 10      | Upregulated |
| A_23_P746 | 0.002464 | 0.000419  | 3.56 | G0S2        | G0/G1 switch 2                                                | Upregulated |
| A_23_P152 | 0.000483 | 4.95E-06  | 3.55 | SNRNP25     | small nuclear ribonucleoprotein 25kDa (U11/U12)               | Upregulated |
| A_33_P333 | 0.000483 | 5.49E-06  | 3.55 | MTMR10      | myotubularin related protein 10                               | Upregulated |
| A_23_P203 | 0.00056  | 0.0000161 | 3.55 | ACER3       | alkaline ceramidase 3                                         | Upregulated |
| A_23_P654 | 0.000707 | 0.0000343 | 3.55 | HAUS4       | HAUS augmin-like complex, subunit 4                           | Upregulated |
| A_23_P210 | 0.00226  | 0.00037   | 3.55 | EPAS1       | endothelial PAS domain protein 1                              | Upregulated |
| A_23_P161 | 0.000483 | 4.01E-06  | 3.54 | ASAH2       | N-acylsphingosine amidohydrolase (non-lysosomal ceramidase) 2 | Upregulated |
| A_23_P204 | 0.000483 | 4.08E-06  | 3.54 | NOP2        | NOP2 nucleolar protein                                        | Upregulated |
| A_23_P337 | 0.000526 | 0.0000116 | 3.54 | PPFIBP1     | PTPRF interacting protein, binding protein 1 (liprin beta 1)  | Upregulated |
| A_33_P321 | 0.000957 | 0.0000709 | 3.54 | PDCD4       | programmed cell death 4 (neoplastic transformation inhibitor) | Upregulated |
| A_22_P000 | 0.00104  | 0.0000867 | 3.54 | lnc-WIBG-1  | lnc-WIBG-1:1                                                  | Upregulated |
| A_33_P321 | 0.001133 | 0.000105  | 3.54 | MID1IP1     | MID1 interacting protein 1                                    | Upregulated |
| A_22_P000 | 0.0005   | 8.04E-06  | 3.53 | lnc-LRMP-3  | lnc-LRMP-3:1                                                  | Upregulated |
| A_24_P162 | 0.001244 | 0.000128  | 3.53 | LINC00665   | long intergenic non-protein coding RNA 665                    | Upregulated |
| A_23_P213 | 0.00126  | 0.000131  | 3.53 | FGF1        | fibroblast growth factor 1 (acidic)                           | Upregulated |
| A_22_P000 | 0.004269 | 0.000963  | 3.53 | lnc-NDST1-1 | lnc-NDST1-1:1                                                 | Upregulated |
| A_33_P328 | 0.000498 | 7.84E-06  | 3.51 | LENG8       | leukocyte receptor cluster (LRC) member 8                     | Upregulated |
| A_23_P108 | 0.000584 | 0.0000199 | 3.51 | ANKLE2      | ankyrin repeat and LEM domain containing 2                    | Upregulated |
| A_24_P135 | 0.000605 | 0.0000227 | 3.51 | KCTD9       | potassium channel tetramerization domain containing 9         | Upregulated |
| A_24_P295 | 0.000788 | 0.0000457 | 3.51 | HBS1L       | HBS1-like translational GTPase                                | Upregulated |
| A_33_P331 | 0.000846 | 0.0000538 | 3.51 | CCDC34      | coiled-coil domain containing 34                              | Upregulated |
| A_23_P257 | 0.000994 | 0.0000775 | 3.51 | PEX13       | peroxisomal biogenesis factor 13                              | Upregulated |
| A_21_P000 | 0.001068 | 0.0000932 | 3.51 | lnc-RNF144A | lnc-RNF144A-3:1                                               | Upregulated |
| A_23_P167 | 0.000486 | 7.07E-06  | 3.5  | TMA16       | translation machinery associated 16 homolog (S. cerevisiae)   | Upregulated |
| A_23_P156 | 0.000515 | 9.26E-06  | 3.5  | ZNF622      | zinc finger protein 622                                       | Upregulated |
| A_21_P000 | 0.000515 | 9.81E-06  | 3.5  | lnc-ARRDC3- | lnc-ARRDC3-1:1                                                | Upregulated |
| A_24_P415 | 0.000707 | 0.0000345 | 3.5  | HPS1        | Hermansky-Pudlak syndrome 1                                   | Upregulated |
| A_33_P338 | 0.003543 | 0.000732  | 3.5  | CYB5D1      | cytochrome b5 domain containing 1                             | Upregulated |
| A_23_P930 | 0.000525 | 0.0000112 | 3.49 | APH1A       | APH1A gamma secretase subunit                                 | Upregulated |
| A_33_P341 | 0.000575 | 0.0000178 | 3.49 | GK          | glycerol kinase                                               | Upregulated |

|           |          |           |      |              |                                                         |             |
|-----------|----------|-----------|------|--------------|---------------------------------------------------------|-------------|
| A_24_P354 | 0.000577 | 0.0000184 | 3.49 | TAGAP        | T-cell activation RhoGTPase activating protein          | Upregulated |
| A_33_P335 | 0.000695 | 0.0000315 | 3.49 | SMC2         | structural maintenance of chromosomes 2                 | Upregulated |
| A_21_P001 | 0.001295 | 0.000138  | 3.49 | TBC1D3P1-D   | TBC1D3P1-DHX40P1 readthrough transcribed pseudogene     | Upregulated |
| A_23_P941 | 0.000726 | 0.0000378 | 3.48 | NEIL2        | nei endonuclease VIII-like 2 (E. coli)                  | Upregulated |
| A_24_P135 | 0.001021 | 0.0000832 | 3.48 | UEVLD        | UEV and lactate/malate dehydrogenase domains            | Upregulated |
| A_21_P001 | 0.003094 | 0.000595  | 3.48 | LINC01237    | long intergenic non-protein coding RNA 1237             | Upregulated |
| A_33_P332 | 0.000483 | 6.22E-06  | 3.47 | MOK          | MOK protein kinase                                      | Upregulated |
| A_23_P324 | 0.000502 | 0.0000084 | 3.47 | SYNJ1        | synaptojanin 1                                          | Upregulated |
| A_24_P213 | 0.00056  | 0.0000164 | 3.47 | MAN1A2       | mannosidase, alpha, class 1A, member 2                  | Upregulated |
| A_23_P259 | 0.000641 | 0.0000259 | 3.47 | TTK          | TTK protein kinase                                      | Upregulated |
| A_24_P393 | 0.000709 | 0.0000349 | 3.47 | PACS2        | phosphofurin acidic cluster sorting protein 2           | Upregulated |
| A_23_P420 | 0.001265 | 0.000132  | 3.47 | ORC3         | origin recognition complex, subunit 3                   | Upregulated |
| A_23_P134 | 0.00239  | 0.000401  | 3.47 | SLC18B1      | solute carrier family 18, subfamily B, member 1         | Upregulated |
| A_23_P132 | 0.000483 | 4.82E-06  | 3.46 | ACAD9        | acyl-CoA dehydrogenase family, member 9                 | Upregulated |
| A_23_P256 | 0.000526 | 0.0000123 | 3.46 | AKIRIN1      | akirin 1                                                | Upregulated |
| A_23_P210 | 0.000483 | 6.32E-06  | 3.45 | BCL2L1       | BCL2-like 1                                             | Upregulated |
| A_22_P000 | 0.00063  | 0.000025  | 3.45 | LOC1027249   | uncharacterized LOC102724901                            | Upregulated |
| A_23_P194 | 0.000661 | 0.0000277 | 3.45 | STK19        | serine/threonine kinase 19                              | Upregulated |
| A_22_P000 | 0.001031 | 0.0000852 | 3.45 | lnc-DDX51-2  | lnc-DDX51-2:1                                           | Upregulated |
| A_23_P268 | 0.001203 | 0.00012   | 3.45 | ARHGAP44     | Rho GTPase activating protein 44                        | Upregulated |
| A_23_P800 | 0.001901 | 0.000274  | 3.45 | PROCR        | protein C receptor, endothelial                         | Upregulated |
| A_23_P115 | 0.000506 | 8.65E-06  | 3.44 | TMEM125      | transmembrane protein 125                               | Upregulated |
| A_22_P000 | 0.000589 | 0.0000205 | 3.44 | lnc-WDR77-1  | lnc-WDR77-1:1                                           | Upregulated |
| A_23_P422 | 0.000887 | 0.0000597 | 3.44 | SUV39H1      | suppressor of variegation 3-9 homolog 1 (Drosophila)    | Upregulated |
| A_23_P363 | 0.000571 | 0.0000173 | 3.43 | C1RL         | complement component 1, r subcomponent-like             | Upregulated |
| A_23_P589 | 0.001256 | 0.00013   | 3.43 | TBC1D22B     | TBC1 domain family, member 22B                          | Upregulated |
| A_22_P000 | 0.001398 | 0.000158  | 3.43 | MIR612       | microRNA 612                                            | Upregulated |
| A_33_P353 | 0.00399  | 0.000871  | 3.43 | C5orf42      | chromosome 5 open reading frame 42                      | Upregulated |
| A_21_P001 | 0.000634 | 0.0000252 | 3.42 | NF1          | neurofibromin 1                                         | Upregulated |
| A_23_P202 | 0.001267 | 0.000133  | 3.42 | CXCL12       | chemokine (C-X-C motif) ligand 12                       | Upregulated |
| A_23_P153 | 0.000711 | 0.0000356 | 3.41 | ZNF624       | zinc finger protein 624                                 | Upregulated |
| A_23_P110 | 0.001358 | 0.00015   | 3.41 | CSF1R        | colony stimulating factor 1 receptor                    | Upregulated |
| A_23_P321 | 0.002858 | 0.000527  | 3.41 | DTWD1        | DTW domain containing 1                                 | Upregulated |
| A_33_P334 | 0.003909 | 0.000845  | 3.41 | ANKRD20A12   | ankyrin repeat domain 20 family, member A12, pseudogene | Upregulated |
| A_23_P559 | 0.005305 | 0.00133   | 3.41 | PRR12        | proline rich 12                                         | Upregulated |
| A_22_P000 | 0.00077  | 0.0000432 | 3.4  | lnc-ATP2A1-1 | lnc-ATP2A1-1:1                                          | Upregulated |
| A_33_P366 | 0.000814 | 0.0000501 | 3.4  | AHCTF1       | AT hook containing transcription factor 1               | Upregulated |

|           |          |           |      |                |                                                                            |             |
|-----------|----------|-----------|------|----------------|----------------------------------------------------------------------------|-------------|
| A_23_P170 | 0.00056  | 0.0000165 | 3.39 | TMEM57         | transmembrane protein 57                                                   | Upregulated |
| A_23_P354 | 0.000906 | 0.0000624 | 3.39 | CISD1          | CDGSH iron sulfur domain 1                                                 | Upregulated |
| A_33_P334 | 0.001261 | 0.000131  | 3.39 | SIRPG          | signal-regulatory protein gamma                                            | Upregulated |
| A_21_P001 | 0.000513 | 9.01E-06  | 3.38 | XLOC_I2_013189 |                                                                            | Upregulated |
| A_32_P755 | 0.00056  | 0.0000159 | 3.38 | TAMM41         | TAM41, mitochondrial translocator assembly and maintenance protein, 1      | Upregulated |
| A_24_P280 | 0.001171 | 0.000113  | 3.38 | LOC1001291     | THAP domain containing, apoptosis associated protein 3 pseudogene          | Upregulated |
| A_22_P000 | 0.000483 | 5.48E-06  | 3.37 | lnc-TCIRG1-1   | lnc-TCIRG1-1:1                                                             | Upregulated |
| A_24_P206 | 0.000486 | 7.04E-06  | 3.37 | ZNF746         | zinc finger protein 746                                                    | Upregulated |
| A_23_P256 | 0.000675 | 0.0000292 | 3.37 | RNF219         | ring finger protein 219                                                    | Upregulated |
| A_23_P356 | 0.000697 | 0.000032  | 3.37 | RBM17          | RNA binding motif protein 17                                               | Upregulated |
| A_23_P566 | 0.000965 | 0.0000732 | 3.37 | INO80B         | INO80 complex subunit B                                                    | Upregulated |
| A_24_P181 | 0.0015   | 0.000181  | 3.37 | B3GNTL1        | UDP-GlcNAc:betaGal beta-1,3-N-acetylglucosaminyltransferase-like 1         | Upregulated |
| A_22_P000 | 0.000502 | 8.38E-06  | 3.36 | lnc-MDH1B-2    | lnc-MDH1B-2:1                                                              | Upregulated |
| A_23_P121 | 0.000526 | 0.0000123 | 3.36 | TWF2           | twinfilin actin-binding protein 2                                          | Upregulated |
| A_22_P000 | 0.0017   | 0.000226  | 3.36 | lnc-SPSB4-1    | lnc-SPSB4-1:1                                                              | Upregulated |
| A_21_P000 | 0.00433  | 0.000985  | 3.36 | LOC1019275     | uncharacterized LOC101927598                                               | Upregulated |
| A_23_P428 | 0.006498 | 0.00178   | 3.36 | EZH1           | enhancer of zeste 1 polycomb repressive complex 2 subunit                  | Upregulated |
| A_23_P204 | 0.000486 | 7.04E-06  | 3.35 | RAB35          | RAB35, member RAS oncogene family                                          | Upregulated |
| A_21_P000 | 0.000525 | 0.0000112 | 3.35 | lnc-KIAA1919   | lnc-KIAA1919-1:1                                                           | Upregulated |
| A_23_P202 | 0.000603 | 0.0000222 | 3.35 | MADD           | MAP-kinase activating death domain                                         | Upregulated |
| A_24_P269 | 0.000693 | 0.000031  | 3.35 | PLEKHA1        | pleckstrin homology domain containing, family A (phosphoinositide binding) | Upregulated |
| A_33_P324 | 0.000718 | 0.0000366 | 3.35 | C10orf128      | chromosome 10 open reading frame 128                                       | Upregulated |
| A_33_P326 | 0.001055 | 0.0000896 | 3.35 | DYNLT1         | dynein, light chain, Tctex-type 1                                          | Upregulated |
| A_19_P008 | 0.001398 | 0.000158  | 3.35 | LINC01355      | long intergenic non-protein coding RNA 1355                                | Upregulated |
| A_21_P000 | 0.001812 | 0.000252  | 3.35 | lnc-GATA3-3    | lnc-GATA3-3:1                                                              | Upregulated |
| A_33_P681 | 0.003817 | 0.000816  | 3.35 | PITRM1-AS1     | PITRM1 antisense RNA 1                                                     | Upregulated |
| A_23_P365 | 0.000707 | 0.000034  | 3.34 | ZNF783         | zinc finger family member 783                                              | Upregulated |
| A_22_P000 | 0.000483 | 0.0000061 | 3.33 | lnc-C1QTNF5    | lnc-C1QTNF5-1:1                                                            | Upregulated |
| A_23_P253 | 0.000526 | 0.0000121 | 3.33 | GPR171         | G protein-coupled receptor 171                                             | Upregulated |
| A_33_P339 | 0.000664 | 0.0000281 | 3.33 | C14orf28       | chromosome 14 open reading frame 28                                        | Upregulated |
| A_22_P000 | 0.002167 | 0.000346  | 3.33 | lnc-CEP170-5   | lnc-CEP170-5:1                                                             | Upregulated |
| A_22_P000 | 0.003766 | 0.0008    | 3.33 | lnc-C18orf32-  | lnc-C18orf32-1:1                                                           | Upregulated |
| A_23_P422 | 0.000521 | 0.0000103 | 3.32 | PPIC           | peptidylprolyl isomerase C (cyclophilin C)                                 | Upregulated |
| A_33_P322 | 0.000597 | 0.0000214 | 3.32 | ZNF197         | zinc finger protein 197                                                    | Upregulated |
| A_24_P252 | 0.000814 | 0.0000499 | 3.32 | CLP1           | cleavage and polyadenylation factor I subunit 1                            | Upregulated |
| A_21_P000 | 0.000831 | 0.000052  | 3.32 | lnc-C2orf27B-  | lnc-C2orf27B-3:2                                                           | Upregulated |
| A_24_P137 | 0.001304 | 0.00014   | 3.32 | GFM2           | G elongation factor, mitochondrial 2                                       | Upregulated |



|           |          |           |      |              |                                                                             |             |
|-----------|----------|-----------|------|--------------|-----------------------------------------------------------------------------|-------------|
| A_23_P334 | 0.00134  | 0.000146  | 3.32 | TBC1D31      | TBC1 domain family, member 31                                               | Upregulated |
| A_24_P465 | 0.003715 | 0.000784  | 3.32 | ZNRD1        | zinc ribbon domain containing 1                                             | Upregulated |
| A_32_P221 | 0.004205 | 0.00094   | 3.32 | RABL3        | RAB, member of RAS oncogene family-like 3                                   | Upregulated |
| A_33_P339 | 0.004411 | 0.00101   | 3.32 | PIP4K2A      | phosphatidylinositol-5-phosphate 4-kinase, type II, alpha                   | Upregulated |
| A_22_P000 | 0.000483 | 6.31E-06  | 3.31 | lnc-DCLRE1B  | lnc-DCLRE1B-2:1                                                             | Upregulated |
| A_23_P963 | 0.000715 | 0.0000362 | 3.31 | ERCC6L       | excision repair cross-complementation group 6-like                          | Upregulated |
| A_22_P000 | 0.001291 | 0.000137  | 3.31 | lnc-CHRNA3-2 | lnc-CHRNA3-2:1                                                              | Upregulated |
| A_33_P331 | 0.005707 | 0.00147   | 3.31 | TRAPPC10     | trafficking protein particle complex 10                                     | Upregulated |
| A_19_P003 | 0.000521 | 0.0000106 | 3.3  | LINC01197    | long intergenic non-protein coding RNA 1197                                 | Upregulated |
| A_33_P332 | 0.000532 | 0.0000132 | 3.3  | BACH1        | BTB and CNC homology 1, basic leucine zipper transcription factor 1         | Upregulated |
| A_23_P391 | 0.001139 | 0.000107  | 3.3  | MANEAL       | mannosidase, endo-alpha-like                                                | Upregulated |
| A_23_P828 | 0.002572 | 0.000449  | 3.3  | OSGIN2       | oxidative stress induced growth inhibitor family member 2                   | Upregulated |
| A_21_P001 | 0.005795 | 0.00151   | 3.3  | LOC1019299   | uncharacterized LOC101929917                                                | Upregulated |
| A_33_P331 | 0.000526 | 0.0000123 | 3.29 | MOB1B        | MOB kinase activator 1B                                                     | Upregulated |
| A_23_P154 | 0.000885 | 0.0000594 | 3.29 | PTRH2        | peptidyl-tRNA hydrolase 2                                                   | Upregulated |
| A_33_P331 | 0.000483 | 5.53E-06  | 3.28 | MT1HL1       | metallothionein 1H-like 1                                                   | Upregulated |
| A_23_P427 | 0.000498 | 7.94E-06  | 3.28 | MT1L         | metallothionein 1L (gene/pseudogene)                                        | Upregulated |
| A_23_P173 | 0.000521 | 0.0000107 | 3.28 | MRGBP        | MRG/MORF4L binding protein                                                  | Upregulated |
| A_23_P900 | 0.000578 | 0.0000189 | 3.28 | GPR108       | G protein-coupled receptor 108                                              | Upregulated |
| A_23_P555 | 0.000902 | 0.0000615 | 3.28 | RNMT         | RNA (guanine-7-) methyltransferase                                          | Upregulated |
| A_33_P328 | 0.001047 | 0.0000882 | 3.28 | SORBS1       | sorbin and SH3 domain containing 1                                          | Upregulated |
| A_23_P120 | 0.000483 | 5.91E-06  | 3.27 | MCM3AP       | minichromosome maintenance complex component 3 associated protein           | Upregulated |
| A_33_P323 | 0.000526 | 0.0000121 | 3.27 | LARP1B       | La ribonucleoprotein domain family, member 1B                               | Upregulated |
| A_23_P141 | 0.000728 | 0.000038  | 3.27 | NCOR1        | nuclear receptor corepressor 1                                              | Upregulated |
| A_23_P203 | 0.00089  | 0.0000602 | 3.27 | NEU3         | sialidase 3 (membrane sialidase)                                            | Upregulated |
| A_33_P327 | 0.000944 | 0.0000687 | 3.27 | NIPSNAP3B    | nipsnap homolog 3B (C. elegans)                                             | Upregulated |
| A_23_P241 | 0.000976 | 0.0000751 | 3.27 | CCNJ         | cyclin J                                                                    | Upregulated |
| A_23_P259 | 0.000483 | 6.42E-06  | 3.26 | LGMM         | legumain                                                                    | Upregulated |
| A_23_P134 | 0.000506 | 8.66E-06  | 3.26 | GPNMB        | glycoprotein (transmembrane) nmb                                            | Upregulated |
| A_32_P791 | 0.000525 | 0.0000115 | 3.26 | ANKRD20A12   | ankyrin repeat domain 20 family, member A12, pseudogene                     | Upregulated |
| A_33_P340 | 0.000534 | 0.0000136 | 3.26 | C9orf85      | chromosome 9 open reading frame 85                                          | Upregulated |
| A_23_P371 | 0.001043 | 0.0000873 | 3.26 | DNM3         | dynammin 3                                                                  | Upregulated |
| A_23_P130 | 0.00122  | 0.000123  | 3.26 | CEP89        | centrosomal protein 89kDa                                                   | Upregulated |
| A_33_P323 | 0.001603 | 0.000202  | 3.26 | PIN4         | protein (peptidylprolyl cis/trans isomerase) NIMA-interacting, 4 (parvulin) | Upregulated |
| A_33_P341 | 0.000515 | 9.93E-06  | 3.25 | CLCN5        | chloride channel, voltage-sensitive 5                                       | Upregulated |
| A_22_P000 | 0.000521 | 0.0000105 | 3.25 | LOC1009964   | uncharacterized LOC100996437                                                | Upregulated |
| A_24_P348 | 0.000725 | 0.0000376 | 3.25 | PLEKHA7      | pleckstrin homology domain containing, family A member 7                    | Upregulated |

|           |          |           |      |                |                                                                                                   |             |
|-----------|----------|-----------|------|----------------|---------------------------------------------------------------------------------------------------|-------------|
| A_23_P111 | 0.000779 | 0.0000442 | 3.25 | MRPL32         | mitochondrial ribosomal protein L32                                                               | Upregulated |
| A_23_P349 | 0.001398 | 0.000158  | 3.25 | DIEXF          | digestive organ expansion factor homolog (zebrafish)                                              | Upregulated |
| A_33_P388 | 0.000498 | 0.0000078 | 3.24 | ZCCHC10        | zinc finger, CCHC domain containing 10                                                            | Upregulated |
| A_33_P341 | 0.000599 | 0.0000215 | 3.24 | ZNF235         | zinc finger protein 235                                                                           | Upregulated |
| A_33_P327 | 0.000662 | 0.0000279 | 3.24 | SYT6           | synaptotagmin VI                                                                                  | Upregulated |
| A_33_P324 | 0.001356 | 0.000149  | 3.24 | FOXO3          | forkhead box O3                                                                                   | Upregulated |
| A_21_P000 | 0.008047 | 0.00238   | 3.24 | BTN2A2         | butyrophilin, subfamily 2, member A2                                                              | Upregulated |
| A_24_P401 | 0.000486 | 6.96E-06  | 3.23 | TPH2           | tryptophan hydroxylase 2                                                                          | Upregulated |
| A_23_P160 | 0.000486 | 6.99E-06  | 3.23 | LAMC2          | laminin, gamma 2                                                                                  | Upregulated |
| A_24_P126 | 0.000939 | 0.0000679 | 3.23 | CAV1           | caveolin 1, caveolae protein, 22kDa                                                               | Upregulated |
| A_23_P416 | 0.000975 | 0.0000749 | 3.23 | MS4A6E         | membrane-spanning 4-domains, subfamily A, member 6E                                               | Upregulated |
| A_23_P807 | 0.00125  | 0.000129  | 3.23 | DIRC2          | disrupted in renal carcinoma 2                                                                    | Upregulated |
| A_33_P333 | 0.006885 | 0.00192   | 3.23 | SNAPC5         | small nuclear RNA activating complex, polypeptide 5, 19kDa                                        | Upregulated |
| A_33_P333 | 0.000483 | 5.67E-06  | 3.22 | OR7E37P        | olfactory receptor, family 7, subfamily E, member 37 pseudogene                                   | Upregulated |
| A_24_P350 | 0.000483 | 6.29E-06  | 3.22 | PDPR           | pyruvate dehydrogenase phosphatase regulatory subunit                                             | Upregulated |
| A_23_P334 | 0.000609 | 0.000023  | 3.22 | NRG4           | neuregulin 4                                                                                      | Upregulated |
| A_23_P944 | 0.002726 | 0.00049   | 3.22 | MELK           | maternal embryonic leucine zipper kinase                                                          | Upregulated |
| A_23_P349 | 0.00071  | 0.0000354 | 3.21 | FBXO41         | F-box protein 41                                                                                  | Upregulated |
| A_33_P332 | 0.003684 | 0.000774  | 3.21 | TNFRSF10D      | tumor necrosis factor receptor superfamily, member 10d, decoy with truncated extracellular domain | Upregulated |
| A_24_P143 | 0.004634 | 0.00109   | 3.21 | SIRPB1         | signal-regulatory protein beta 1                                                                  | Upregulated |
| A_33_P747 | 0.000513 | 8.99E-06  | 3.2  | THUMPD3-AS1    | THUMPD3 antisense RNA 1                                                                           | Upregulated |
| A_19_P003 | 0.000575 | 0.0000176 | 3.2  | LOC1019297     | uncharacterized LOC101929709                                                                      | Upregulated |
| A_33_P322 | 0.000675 | 0.0000293 | 3.2  | OXER1          | oxoeicosanoid (OXE) receptor 1                                                                    | Upregulated |
| A_21_P001 | 0.000879 | 0.0000585 | 3.2  | SNHG21         | small nucleolar RNA host gene 21 (non-protein coding)                                             | Upregulated |
| A_22_P000 | 0.00096  | 0.0000717 | 3.2  | lnc-ZNF814-1   | lnc-ZNF814-1:1                                                                                    | Upregulated |
| A_22_P000 | 0.001324 | 0.000143  | 3.2  | lnc-PLEKHA3    | lnc-PLEKHA3-2:2                                                                                   | Upregulated |
| A_21_P001 | 0.002008 | 0.000303  | 3.2  | ANKRD20A1      | ankyrin repeat domain 20 family, member A11, pseudogene                                           | Upregulated |
| A_33_P338 | 0.004831 | 0.00115   | 3.2  | LRRK2          | leucine-rich repeat kinase 2                                                                      | Upregulated |
| A_33_P327 | 0.000486 | 7.17E-06  | 3.19 | RABEP1         | rabaptin, RAB GTPase binding effector protein 1                                                   | Upregulated |
| A_32_P723 | 0.000494 | 7.52E-06  | 3.19 | PRKAR1B        | protein kinase, cAMP-dependent, regulatory, type I, beta                                          | Upregulated |
| A_23_P317 | 0.001198 | 0.000118  | 3.19 | AKAP10         | A kinase (PRKA) anchor protein 10                                                                 | Upregulated |
| A_33_P339 | 0.003012 | 0.000572  | 3.19 | XLOC_l2_001559 |                                                                                                   | Upregulated |
| A_33_P335 | 0.003511 | 0.00072   | 3.19 | CSF1           | colony stimulating factor 1 (macrophage)                                                          | Upregulated |
| A_23_P386 | 0.000515 | 9.27E-06  | 3.18 | PPID           | peptidylprolyl isomerase D                                                                        | Upregulated |
| A_24_P244 | 0.000526 | 0.0000126 | 3.18 | RNF41          | ring finger protein 41, E3 ubiquitin protein ligase                                               | Upregulated |
| A_21_P000 | 0.002944 | 0.00055   | 3.18 | lnc-FRG1-5     | lnc-FRG1-5:3                                                                                      | Upregulated |
| A_33_P330 | 0.003191 | 0.000627  | 3.18 | USP47          | ubiquitin specific peptidase 47                                                                   | Upregulated |

|           |          |           |      |               |                                                                          |             |
|-----------|----------|-----------|------|---------------|--------------------------------------------------------------------------|-------------|
| A_22_P000 | 0.003359 | 0.000677  | 3.18 | lnc-C3orf23-2 | lnc-C3orf23-2:1                                                          | Upregulated |
| A_23_P116 | 0.000527 | 0.0000129 | 3.17 | C12orf10      | chromosome 12 open reading frame 10                                      | Upregulated |
| A_23_P112 | 0.001245 | 0.000128  | 3.17 | NKRF          | NFKB repressing factor                                                   | Upregulated |
| A_23_P354 | 0.000515 | 9.57E-06  | 3.16 | PCDHGA8       | protocadherin gamma subfamily A, 8                                       | Upregulated |
| A_32_P445 | 0.000515 | 9.82E-06  | 3.16 | LDHA          | lactate dehydrogenase A                                                  | Upregulated |
| A_32_P403 | 0.00056  | 0.0000163 | 3.16 | LOC389906     | zinc finger protein 839 pseudogene                                       | Upregulated |
| A_24_P334 | 0.00056  | 0.0000165 | 3.16 | FN1           | fibronectin 1                                                            | Upregulated |
| A_33_P327 | 0.000697 | 0.0000319 | 3.16 | THAP3         | THAP domain containing, apoptosis associated protein 3                   | Upregulated |
| A_23_P501 | 0.00283  | 0.000518  | 3.16 | NDC80         | NDC80 kinetochore complex component                                      | Upregulated |
| A_33_P334 | 0.000486 | 7.17E-06  | 3.15 | NUBPL         | nucleotide binding protein-like                                          | Upregulated |
| A_23_P236 | 0.00056  | 0.0000157 | 3.15 | AMY1C         | amylase, alpha 1C (salivary)                                             | Upregulated |
| A_23_P689 | 0.001266 | 0.000133  | 3.15 | MICALL1       | MICAL-like 1                                                             | Upregulated |
| A_23_P141 | 0.001453 | 0.000171  | 3.15 | UBE2M         | ubiquitin-conjugating enzyme E2M                                         | Upregulated |
| A_23_P880 | 0.001885 | 0.00027   | 3.15 | LHFP          | lipoma HMGIC fusion partner                                              | Upregulated |
| A_33_P324 | 0.004995 | 0.00121   | 3.15 | SLC4A5        | solute carrier family 4 (sodium bicarbonate cotransporter), member 5     | Upregulated |
| A_23_P403 | 0.005346 | 0.00134   | 3.15 | JMJD7-PLA2G4B | JMJD7-PLA2G4B readthrough                                                | Upregulated |
| A_32_P806 | 0.000639 | 0.0000256 | 3.14 | ARL4A         | ADP-ribosylation factor-like 4A                                          | Upregulated |
| A_23_P316 | 0.000695 | 0.0000315 | 3.14 | BUD31         | BUD31 homolog (S. cerevisiae)                                            | Upregulated |
| A_32_P927 | 0.000814 | 0.00005   | 3.14 | STIP1         | stress-induced phosphoprotein 1                                          | Upregulated |
| A_24_P140 | 0.00104  | 0.0000866 | 3.14 | LRRTM2        | leucine rich repeat transmembrane neuronal 2                             | Upregulated |
| A_22_P000 | 0.001321 | 0.000142  | 3.14 | TMEM161B-AS1  | TMEM161B antisense RNA 1                                                 | Upregulated |
| A_22_P000 | 0.001753 | 0.000237  | 3.14 | lnc-C2orf69-4 | lnc-C2orf69-4:1                                                          | Upregulated |
| A_33_P350 | 0.001936 | 0.000283  | 3.14 | LOC1027235    | uncharacterized LOC102723564                                             | Upregulated |
| A_23_P275 | 0.007746 | 0.00227   | 3.14 | MCOLN1        | mucolipin 1                                                              | Upregulated |
| A_24_P379 | 0.000526 | 0.0000124 | 3.13 | MXD1          | MAX dimerization protein 1                                               | Upregulated |
| A_19_P003 | 0.000526 | 0.0000127 | 3.13 | UBA6-AS1      | UBA6 antisense RNA 1 (head to head)                                      | Upregulated |
| A_23_P162 | 0.000535 | 0.0000137 | 3.13 | ARNTL         | aryl hydrocarbon receptor nuclear translocator-like                      | Upregulated |
| A_23_P151 | 0.000578 | 0.0000186 | 3.13 | IL32          | interleukin 32                                                           | Upregulated |
| A_23_P347 | 0.000635 | 0.0000254 | 3.13 | SGPP1         | sphingosine-1-phosphate phosphatase 1                                    | Upregulated |
| A_22_P000 | 0.000786 | 0.0000454 | 3.13 | LOC1027249    | uncharacterized LOC102724915                                             | Upregulated |
| A_33_P332 | 0.000825 | 0.0000513 | 3.13 | ATXN1         | ataxin 1                                                                 | Upregulated |
| A_22_P000 | 0.00093  | 0.0000662 | 3.13 | lnc-C1QBP-1   | lnc-C1QBP-1:1                                                            | Upregulated |
| A_23_P107 | 0.003791 | 0.000807  | 3.13 | FUT1          | fucosyltransferase 1 (galactoside 2-alpha-L-fucosyltransferase, H blood) | Upregulated |
| A_23_P166 | 0.000498 | 7.93E-06  | 3.12 | PFDN4         | prefoldin subunit 4                                                      | Upregulated |
| A_23_P116 | 0.000502 | 8.31E-06  | 3.12 | USP35         | ubiquitin specific peptidase 35                                          | Upregulated |
| A_23_P113 | 0.000515 | 9.51E-06  | 3.12 | EXOC1         | exocyst complex component 1                                              | Upregulated |
| A_23_P605 | 0.000525 | 0.0000115 | 3.12 | DNAJC7        | DnaJ (Hsp40) homolog, subfamily C, member 7                              | Upregulated |

|           |          |           |      |              |                                                               |             |
|-----------|----------|-----------|------|--------------|---------------------------------------------------------------|-------------|
| A_33_P335 | 0.000707 | 0.0000345 | 3.12 | LOC1019291   | uncharacterized LOC101929115                                  | Upregulated |
| A_32_P961 | 0.00076  | 0.0000417 | 3.12 | DPY19L1      | dpy-19-like 1 (C. elegans)                                    | Upregulated |
| A_23_P747 | 0.000869 | 0.0000575 | 3.12 | C1orf54      | chromosome 1 open reading frame 54                            | Upregulated |
| A_23_P309 | 0.001397 | 0.000157  | 3.12 | N4BP2        | NEDD4 binding protein 2                                       | Upregulated |
| A_23_P136 | 0.001525 | 0.000186  | 3.12 | PIGG         | phosphatidylinositol glycan anchor biosynthesis, class G      | Upregulated |
| A_23_P136 | 0.001668 | 0.000218  | 3.12 | RPGR         | retinitis pigmentosa GTPase regulator                         | Upregulated |
| A_21_P000 | 0.002002 | 0.000301  | 3.12 | lnc-GRB7-1   | lnc-GRB7-1:1                                                  | Upregulated |
| A_24_P290 | 0.00579  | 0.0015    | 3.12 | DTX1         | deltex 1, E3 ubiquitin ligase                                 | Upregulated |
| A_24_P353 | 0.010673 | 0.00347   | 3.12 | GALNT2       | polypeptide N-acetylgalactosaminyltransferase 2               | Upregulated |
| A_19_P003 | 0.000541 | 0.0000144 | 3.11 | TUG1         | taurine up-regulated 1 (non-protein coding)                   | Upregulated |
| A_33_P338 | 0.00056  | 0.0000164 | 3.11 | WHSC1L1      | Wolf-Hirschhorn syndrome candidate 1-like 1                   | Upregulated |
| A_23_P135 | 0.000578 | 0.0000191 | 3.11 | PRSS3        | protease, serine, 3                                           | Upregulated |
| A_22_P000 | 0.000743 | 0.0000399 | 3.11 | lnc-ANKUB1-1 | lnc-ANKUB1-1:1                                                | Upregulated |
| A_33_P323 | 0.000807 | 0.0000487 | 3.11 | ZNF776       | zinc finger protein 776                                       | Upregulated |
| A_21_P000 | 0.000929 | 0.0000658 | 3.11 | lnc-UBE2B-1  | lnc-UBE2B-1:1                                                 | Upregulated |
| A_23_P144 | 0.001108 | 0.000101  | 3.11 | EEFSEC       | eukaryotic elongation factor, selenocysteine-tRNA-specific    | Upregulated |
| A_24_P241 | 0.00152  | 0.000184  | 3.11 | CABP2        | calcium binding protein 2                                     | Upregulated |
| A_24_P330 | 0.001889 | 0.000271  | 3.11 | FRMD6        | FERM domain containing 6                                      | Upregulated |
| A_24_P217 | 0.003817 | 0.000816  | 3.11 | TBRG1        | transforming growth factor beta regulator 1                   | Upregulated |
| A_33_P329 | 0.000486 | 7.07E-06  | 3.1  | AKIRIN1      | akirin 1                                                      | Upregulated |
| A_23_P721 | 0.000709 | 0.0000348 | 3.1  | SMPDL3A      | sphingomyelin phosphodiesterase, acid-like 3A                 | Upregulated |
| A_23_P811 | 0.000711 | 0.0000355 | 3.1  | ZBTB9        | zinc finger and BTB domain containing 9                       | Upregulated |
| A_23_P350 | 0.000781 | 0.0000445 | 3.1  | ZDHHC23      | zinc finger, DHHC-type containing 23                          | Upregulated |
| A_33_P681 | 0.000991 | 0.000077  | 3.1  | PCBP1-AS1    | PCBP1 antisense RNA 1                                         | Upregulated |
| A_33_P341 | 0.000498 | 7.77E-06  | 3.09 | SLC17A5      | solute carrier family 17 (acidic sugar transporter), member 5 | Upregulated |
| A_23_P211 | 0.000515 | 9.74E-06  | 3.09 | POFUT2       | protein O-fucosyltransferase 2                                | Upregulated |
| A_23_P151 | 0.000532 | 0.0000134 | 3.09 | MT1F         | metallothionein 1F                                            | Upregulated |
| A_24_P378 | 0.000785 | 0.0000452 | 3.09 | DHRXS        | dehydrogenase/reductase (SDR family) X-linked                 | Upregulated |
| A_22_P000 | 0.001949 | 0.000286  | 3.09 | lnc-AC021066 | lnc-AC021066.1-1:1                                            | Upregulated |
| A_33_P324 | 0.000498 | 0.0000079 | 3.08 | PDE8A        | phosphodiesterase 8A                                          | Upregulated |
| A_22_P000 | 0.000526 | 0.0000123 | 3.08 | lnc-GYG2-1   | lnc-GYG2-1:1                                                  | Upregulated |
| A_23_P801 | 0.00056  | 0.0000164 | 3.08 | WRB          | tryptophan rich basic protein                                 | Upregulated |
| A_22_P000 | 0.000695 | 0.0000313 | 3.08 | LOC1019271   | uncharacterized LOC101927124                                  | Upregulated |
| A_23_P584 | 0.000942 | 0.0000684 | 3.08 | FASTKD3      | FAST kinase domains 3                                         | Upregulated |
| A_23_P105 | 0.00126  | 0.000131  | 3.08 | ME3          | malic enzyme 3, NADP(+)-dependent, mitochondrial              | Upregulated |
| A_33_P340 | 0.001626 | 0.000208  | 3.08 | ZNF776       | zinc finger protein 776                                       | Upregulated |
| A_24_P887 | 0.001843 | 0.00026   | 3.08 | LOXL3        | lysyl oxidase-like 3                                          | Upregulated |

|           |          |           |      |                |                                                                            |             |
|-----------|----------|-----------|------|----------------|----------------------------------------------------------------------------|-------------|
| A_23_P645 | 0.005787 | 0.0015    | 3.08 | PPME1          | protein phosphatase methylesterase 1                                       | Upregulated |
| A_24_P944 | 0.008145 | 0.00242   | 3.08 | LRP2BP         | LRP2 binding protein                                                       | Upregulated |
| A_22_P000 | 0.000486 | 6.92E-06  | 3.07 | LOC1019270     | uncharacterized LOC101927060                                               | Upregulated |
| A_23_P345 | 0.000526 | 0.0000117 | 3.07 | FASTKD2        | FAST kinase domains 2                                                      | Upregulated |
| A_22_P000 | 0.00071  | 0.0000353 | 3.07 | LOC1019270     | uncharacterized LOC101927069                                               | Upregulated |
| A_22_P000 | 0.001469 | 0.000173  | 3.07 | lnc-UTS2D-1    | lnc-UTS2D-1:1                                                              | Upregulated |
| A_23_P157 | 0.003147 | 0.000612  | 3.07 | TNC            | tenascin C                                                                 | Upregulated |
| A_33_P332 | 0.005444 | 0.00138   | 3.07 | PRO0628        | uncharacterized LOC29053                                                   | Upregulated |
| A_33_P325 | 0.005592 | 0.00143   | 3.07 | TIRAP          | toll-interleukin 1 receptor (TIR) domain containing adaptor protein        | Upregulated |
| A_22_P000 | 0.002171 | 0.000347  | 3.06 | lnc-LDHD-1     | lnc-LDHD-1:1                                                               | Upregulated |
| A_21_P001 | 0.002413 | 0.000407  | 3.06 | XLOC_I2_013646 |                                                                            | Upregulated |
| A_23_P147 | 0.005554 | 0.00142   | 3.06 | TOR4A          | torsin family 4, member A                                                  | Upregulated |
| A_33_P329 | 0.000488 | 7.28E-06  | 3.05 | SBNO1          | strawberry notch homolog 1 (Drosophila)                                    | Upregulated |
| A_33_P335 | 0.000515 | 9.79E-06  | 3.05 | PAGR1          | PAXIP1 associated glutamate-rich protein 1                                 | Upregulated |
| A_23_P321 | 0.001007 | 0.0000812 | 3.05 | C9orf9         | chromosome 9 open reading frame 9                                          | Upregulated |
| A_19_P003 | 0.002957 | 0.000555  | 3.05 | LOC1005071     | uncharacterized LOC100507165                                               | Upregulated |
| A_21_P000 | 0.000537 | 0.000014  | 3.04 | SLC9A7         | solute carrier family 9, subfamily A (NHE7, cation proton antiporter 7), m | Upregulated |
| A_23_P629 | 0.000904 | 0.0000617 | 3.04 | UBASH3A        | ubiquitin associated and SH3 domain containing A                           | Upregulated |
| A_33_P331 | 0.001408 | 0.000161  | 3.04 | MC1R           | melanocortin 1 receptor (alpha melanocyte stimulating hormone recepto      | Upregulated |
| A_33_P324 | 0.001965 | 0.000292  | 3.04 | SCAMP1         | secretory carrier membrane protein 1                                       | Upregulated |
| A_23_P398 | 0.000563 | 0.0000167 | 3.03 | PWWP2A         | PWWP domain containing 2A                                                  | Upregulated |
| A_24_P529 | 0.00063  | 0.000025  | 3.03 | BCAT1          | branched chain amino-acid transaminase 1, cytosolic                        | Upregulated |
| A_23_P384 | 0.000728 | 0.0000381 | 3.03 | TRAP1          | TNF receptor-associated protein 1                                          | Upregulated |
| A_24_P630 | 0.001046 | 0.0000878 | 3.03 | DFNB59         | deafness, autosomal recessive 59                                           | Upregulated |
| A_21_P001 | 0.001154 | 0.00011   | 3.03 | INAFM2         | InaF-motif containing 2                                                    | Upregulated |
| A_23_P106 | 0.000513 | 0.000009  | 3.02 | MT2A           | metallothionein 2A                                                         | Upregulated |
| A_22_P000 | 0.000657 | 0.0000274 | 3.02 | lnc-AP000892   | lnc-AP000892.4.1-1:1                                                       | Upregulated |
| A_22_P000 | 0.000664 | 0.0000281 | 3.02 | lnc-TAT-1      | lnc-TAT-1:1                                                                | Upregulated |
| A_23_P620 | 0.000693 | 0.0000309 | 3.02 | SCG5           | secretogranin V (7B2 protein)                                              | Upregulated |
| A_23_P669 | 0.001088 | 0.0000968 | 3.02 | GAREM          | GRB2 associated, regulator of MAPK1                                        | Upregulated |
| A_22_P000 | 0.001767 | 0.000241  | 3.02 | LINC01032      | long intergenic non-protein coding RNA 1032                                | Upregulated |
| A_23_P145 | 0.009439 | 0.00295   | 3.02 | BYSL           | bystin-like                                                                | Upregulated |
| A_23_P414 | 0.000515 | 9.58E-06  | 3.01 | TTC17          | tetratricopeptide repeat domain 17                                         | Upregulated |
| A_33_P321 | 0.000605 | 0.0000227 | 3.01 | AFMID          | arylformamidase                                                            | Upregulated |
| A_24_P435 | 0.000928 | 0.0000656 | 3.01 | MAD2L1BP       | MAD2L1 binding protein                                                     | Upregulated |
| A_21_P001 | 0.001399 | 0.000159  | 3.01 | XLOC_I2_010511 |                                                                            | Upregulated |
| A_23_P169 | 0.00421  | 0.000943  | 3.01 | HTR2B          | 5-hydroxytryptamine (serotonin) receptor 2B, G protein-coupled             | Upregulated |

|           |          |           |      |              |                                                                     |             |
|-----------|----------|-----------|------|--------------|---------------------------------------------------------------------|-------------|
| A_33_P323 | 0.000502 | 8.46E-06  | 3    | MCOLN3       | mucolipin 3                                                         | Upregulated |
| A_22_P000 | 0.000525 | 0.0000113 | 3    | VPS11        | vacuolar protein sorting 11 homolog (S. cerevisiae)                 | Upregulated |
| A_22_P000 | 0.000526 | 0.0000122 | 3    | lnc-FAM78A-1 | lnc-FAM78A-1:1                                                      | Upregulated |
| A_22_P000 | 0.000792 | 0.0000464 | 3    | HCG25        | HLA complex group 25 (non-protein coding)                           | Upregulated |
| A_23_P354 | 0.000824 | 0.0000513 | 3    | ZNF567       | zinc finger protein 567                                             | Upregulated |
| A_33_P681 | 0.000938 | 0.0000676 | 3    | PCBP1-AS1    | PCBP1 antisense RNA 1                                               | Upregulated |
| A_32_P168 | 0.001414 | 0.000162  | 3    | CASK         | calcium/calmodulin-dependent serine protein kinase (MAGUK family)   | Upregulated |
| A_23_P216 | 0.001519 | 0.000184  | 3    | ZBTB5        | zinc finger and BTB domain containing 5                             | Upregulated |
| A_23_P328 | 0.002631 | 0.000465  | 3    | NEURL3       | neuralized E3 ubiquitin protein ligase 3                            | Upregulated |
| A_24_P230 | 0.000498 | 7.81E-06  | 2.99 | IL2RA        | interleukin 2 receptor, alpha                                       | Upregulated |
| A_23_P211 | 0.000566 | 0.0000171 | 2.99 | PRMT2        | protein arginine methyltransferase 2                                | Upregulated |
| A_24_P143 | 0.000621 | 0.0000243 | 2.99 | SPIDR        | scaffolding protein involved in DNA repair                          | Upregulated |
| A_23_P342 | 0.000736 | 0.0000387 | 2.99 | STK35        | serine/threonine kinase 35                                          | Upregulated |
| A_22_P000 | 0.001439 | 0.000166  | 2.99 | lnc-KLF6-2   | lnc-KLF6-2:1                                                        | Upregulated |
| A_33_P321 | 0.001569 | 0.000195  | 2.99 | LOC1009966   | uncharacterized LOC100996662                                        | Upregulated |
| A_24_P485 | 0.006425 | 0.00175   | 2.99 | SIGLEC5      | sialic acid binding Ig-like lectin 5                                | Upregulated |
| A_21_P001 | 0.000578 | 0.0000186 | 2.98 | ZNF518A      | zinc finger protein 518A                                            | Upregulated |
| A_23_P139 | 0.000645 | 0.0000264 | 2.98 | CDK8         | cyclin-dependent kinase 8                                           | Upregulated |
| A_33_P348 | 0.000783 | 0.000045  | 2.98 | NLN          | neurolysin (metallopeptidase M3 family)                             | Upregulated |
| A_33_P324 | 0.000792 | 0.0000461 | 2.98 | APOA1BP      | apolipoprotein A-I binding protein                                  | Upregulated |
| A_23_P140 | 0.001256 | 0.00013   | 2.98 | NGRN         | neugrin, neurite outgrowth associated                               | Upregulated |
| A_24_P234 | 0.001715 | 0.00023   | 2.98 | MXD4         | MAX dimerization protein 4                                          | Upregulated |
| A_33_P324 | 0.00227  | 0.000372  | 2.98 | DLGAP1-AS5   | DLGAP1 antisense RNA 5                                              | Upregulated |
| A_33_P334 | 0.003733 | 0.00079   | 2.98 | SYNPO2L      | synaptopodin 2-like                                                 | Upregulated |
| A_21_P000 | 0.000701 | 0.0000327 | 2.97 | lnc-SNTG2-4  | lnc-SNTG2-4:4                                                       | Upregulated |
| A_23_P993 | 0.000798 | 0.0000472 | 2.97 | TNFSF11      | tumor necrosis factor (ligand) superfamily, member 11               | Upregulated |
| A_23_P140 | 0.006528 | 0.00179   | 2.97 | GOLGA8O      | golgin A8 family, member O                                          | Upregulated |
| A_24_P303 | 0.000712 | 0.0000358 | 2.96 | HNRNPA0      | heterogeneous nuclear ribonucleoprotein A0                          | Upregulated |
| A_22_P000 | 0.001821 | 0.000255  | 2.96 | TRAF3IP2-AS  | TRAF3IP2 antisense RNA 1                                            | Upregulated |
| A_33_P326 | 0.002666 | 0.000474  | 2.96 | ABAT         | 4-aminobutyrate aminotransferase                                    | Upregulated |
| A_33_P327 | 0.005993 | 0.00158   | 2.96 | ACOXL        | acyl-CoA oxidase-like                                               | Upregulated |
| A_23_P167 | 0.000515 | 9.55E-06  | 2.95 | C4orf29      | chromosome 4 open reading frame 29                                  | Upregulated |
| A_23_P152 | 0.000521 | 0.0000107 | 2.95 | ALOX12       | arachidonate 12-lipoxygenase                                        | Upregulated |
| A_24_P129 | 0.000795 | 0.0000469 | 2.95 | TMEM245      | transmembrane protein 245                                           | Upregulated |
| A_23_P253 | 0.000814 | 0.00005   | 2.95 | LRRC17       | leucine rich repeat containing 17                                   | Upregulated |
| A_21_P000 | 0.014383 | 0.00512   | 2.95 | lnc-SHISA3-1 | lnc-SHISA3-1:1                                                      | Upregulated |
| A_33_P321 | 0.000521 | 0.0000104 | 2.94 | SPECC1L      | sperm antigen with calponin homology and coiled-coil domains 1-like | Upregulated |

|           |          |           |      |             |                                                                            |             |
|-----------|----------|-----------|------|-------------|----------------------------------------------------------------------------|-------------|
| A_24_P382 | 0.000522 | 0.0000108 | 2.94 | POLR3K      | polymerase (RNA) III (DNA directed) polypeptide K, 12.3 kDa                | Upregulated |
| A_23_P128 | 0.000526 | 0.000012  | 2.94 | GTPBP4      | GTP binding protein 4                                                      | Upregulated |
| A_21_P001 | 0.000578 | 0.0000192 | 2.94 | LOC1019293  | uncharacterized LOC101929309                                               | Upregulated |
| A_23_P208 | 0.000746 | 0.0000402 | 2.94 | ZNF137P     | zinc finger protein 137, pseudogene                                        | Upregulated |
| A_33_P325 | 0.001037 | 0.0000862 | 2.94 | CRB3        | crumbs family member 3                                                     | Upregulated |
| A_33_P325 | 0.001596 | 0.0002    | 2.94 | HAPLN3      | hyaluronan and proteoglycan link protein 3                                 | Upregulated |
| A_22_P000 | 0.004889 | 0.00118   | 2.94 | ZNF518A     | zinc finger protein 518A                                                   | Upregulated |
| A_23_P127 | 0.000515 | 9.98E-06  | 2.93 | PRRG4       | proline rich Gla (G-carboxyglutamic acid) 4 (transmembrane)                | Upregulated |
| A_24_P371 | 0.000534 | 0.0000136 | 2.93 | MRPL53      | mitochondrial ribosomal protein L53                                        | Upregulated |
| A_23_P772 | 0.000587 | 0.0000202 | 2.93 | CRTC3       | CREB regulated transcription coactivator 3                                 | Upregulated |
| A_33_P352 | 0.000786 | 0.0000454 | 2.93 | KDM2B       | lysine (K)-specific demethylase 2B                                         | Upregulated |
| A_22_P000 | 0.001023 | 0.000084  | 2.93 | TOPORS-AS   | TOPORS antisense RNA 1                                                     | Upregulated |
| A_21_P000 | 0.001132 | 0.000105  | 2.93 | SNORD33     | small nucleolar RNA, C/D box 33                                            | Upregulated |
| A_33_P333 | 0.002664 | 0.000473  | 2.93 | LAMB3       | laminin, beta 3                                                            | Upregulated |
| A_23_P386 | 0.003775 | 0.000802  | 2.93 | FAM110A     | family with sequence similarity 110, member A                              | Upregulated |
| A_23_P926 | 0.004499 | 0.00104   | 2.93 | HELQ        | helicase, POLQ-like                                                        | Upregulated |
| A_22_P000 | 0.000577 | 0.0000182 | 2.92 | KIZ         | kizuna centrosomal protein                                                 | Upregulated |
| A_33_P329 | 0.000619 | 0.0000238 | 2.92 | CYP1B1      | cytochrome P450, family 1, subfamily B, polypeptide 1                      | Upregulated |
| A_33_P323 | 0.000783 | 0.0000448 | 2.92 | ANKRD50     | ankyrin repeat domain 50                                                   | Upregulated |
| A_23_P309 | 0.000783 | 0.0000448 | 2.92 | ZNF777      | zinc finger protein 777                                                    | Upregulated |
| A_23_P322 | 0.000938 | 0.0000675 | 2.92 | TOPORS      | topoisomerase I binding, arginine/serine-rich, E3 ubiquitin protein ligase | Upregulated |
| A_23_P115 | 0.000938 | 0.0000675 | 2.92 | TRIM11      | tripartite motif containing 11                                             | Upregulated |
| A_24_P339 | 0.002799 | 0.00051   | 2.92 | PRSS21      | protease, serine, 21 (testisin)                                            | Upregulated |
| A_33_P322 | 0.005204 | 0.00129   | 2.92 | ST7L        | suppression of tumorigenicity 7 like                                       | Upregulated |
| A_33_P340 | 0.006202 | 0.00166   | 2.92 | ZNF555      | zinc finger protein 555                                                    | Upregulated |
| A_33_P336 | 0.006567 | 0.0018    | 2.92 | CORO1B      | coronin, actin binding protein, 1B                                         | Upregulated |
| A_33_P327 | 0.000515 | 9.66E-06  | 2.91 | PPP1R26     | protein phosphatase 1, regulatory subunit 26                               | Upregulated |
| A_33_P332 | 0.00056  | 0.0000161 | 2.91 | ANO10       | anoctamin 10                                                               | Upregulated |
| A_24_P327 | 0.000578 | 0.0000187 | 2.91 | STIP1       | stress-induced phosphoprotein 1                                            | Upregulated |
| A_24_P191 | 0.000614 | 0.0000235 | 2.91 | NAB1        | NGFI-A binding protein 1 (EGR1 binding protein 1)                          | Upregulated |
| A_22_P000 | 0.001022 | 0.0000835 | 2.91 | lnc-MRPS7-2 | lnc-MRPS7-2:1                                                              | Upregulated |
| A_23_P120 | 0.001208 | 0.00012   | 2.91 | MCFD2       | multiple coagulation factor deficiency 2                                   | Upregulated |
| A_23_P257 | 0.001437 | 0.000166  | 2.91 | GEM         | GTP binding protein overexpressed in skeletal muscle                       | Upregulated |
| A_24_P418 | 0.00176  | 0.000239  | 2.91 | GPX7        | glutathione peroxidase 7                                                   | Upregulated |
| A_33_P320 | 0.003433 | 0.000697  | 2.91 | ZNF623      | zinc finger protein 623                                                    | Upregulated |
| A_33_P328 | 0.000642 | 0.0000262 | 2.9  | ZNF765      | zinc finger protein 765                                                    | Upregulated |
| A_23_P485 | 0.000857 | 0.0000559 | 2.9  | ARHGAP5     | Rho GTPase activating protein 5                                            | Upregulated |

|           |          |           |      |               |                                                           |             |
|-----------|----------|-----------|------|---------------|-----------------------------------------------------------|-------------|
| A_21_P000 | 0.001197 | 0.000118  | 2.9  | lnc-ASMT-2    | lnc-ASMT-2:1                                              | Upregulated |
| A_22_P000 | 0.002043 | 0.000313  | 2.9  | VPS11         | vacuolar protein sorting 11 homolog (S. cerevisiae)       | Upregulated |
| A_33_P332 | 0.008614 | 0.00262   | 2.9  | LOC1001314    | uncharacterized LOC100131432                              | Upregulated |
| A_23_P322 | 0.000526 | 0.0000127 | 2.89 | PPAPDC1B      | phosphatidic acid phosphatase type 2 domain containing 1B | Upregulated |
| A_23_P628 | 0.000537 | 0.0000141 | 2.89 | YRDC          | yrnC N(6)-threonylcarbamoyltransferase domain containing  | Upregulated |
| A_33_P321 | 0.000559 | 0.0000155 | 2.89 | TNIK          | TRAF2 and NCK interacting kinase                          | Upregulated |
| A_33_P341 | 0.000585 | 0.0000202 | 2.89 | ZNF592        | zinc finger protein 592                                   | Upregulated |
| A_23_P388 | 0.000596 | 0.000021  | 2.89 | ZC3H12C       | zinc finger CCCH-type containing 12C                      | Upregulated |
| A_23_P207 | 0.000658 | 0.0000276 | 2.89 | WDR45B        | WD repeat domain 45B                                      | Upregulated |
| A_22_P000 | 0.001266 | 0.000132  | 2.89 | LINC00847     | long intergenic non-protein coding RNA 847                | Upregulated |
| A_32_P139 | 0.003101 | 0.000599  | 2.89 | ABL2          | ABL proto-oncogene 2, non-receptor tyrosine kinase        | Upregulated |
| A_23_P134 | 0.000515 | 9.55E-06  | 2.88 | PLIN2         | perilipin 2                                               | Upregulated |
| A_22_P000 | 0.000541 | 0.0000144 | 2.88 | RORA-AS1      | RORA antisense RNA 1                                      | Upregulated |
| A_22_P000 | 0.000695 | 0.0000316 | 2.88 | lnc-LRP11-1   | lnc-LRP11-1:1                                             | Upregulated |
| A_22_P000 | 0.000731 | 0.0000383 | 2.88 | ARHGAP31-AS   | ARHGAP31 antisense RNA 1                                  | Upregulated |
| A_24_P119 | 0.000731 | 0.0000383 | 2.88 | BLZF1         | basic leucine zipper nuclear factor 1                     | Upregulated |
| A_24_P480 | 0.001227 | 0.000124  | 2.88 | DOK4          | docking protein 4                                         | Upregulated |
| A_23_P324 | 0.002369 | 0.000396  | 2.88 | KLHL7         | kelch-like family member 7                                | Upregulated |
| A_22_P000 | 0.003834 | 0.000822  | 2.88 | lnc-NKX6-3-2  | lnc-NKX6-3-2:1                                            | Upregulated |
| A_33_P681 | 0.000521 | 0.0000107 | 2.87 | THUMPD3-AS    | THUMPD3 antisense RNA 1                                   | Upregulated |
| A_21_P001 | 0.000526 | 0.0000122 | 2.87 | LINC01347     | long intergenic non-protein coding RNA 1347               | Upregulated |
| A_33_P336 | 0.00055  | 0.000015  | 2.87 | RPS6KB1       | ribosomal protein S6 kinase, 70kDa, polypeptide 1         | Upregulated |
| A_32_P116 | 0.000578 | 0.0000191 | 2.87 | LINC00094     | long intergenic non-protein coding RNA 94                 | Upregulated |
| A_22_P000 | 0.000647 | 0.0000267 | 2.87 | lnc-GNAT2-1   | lnc-GNAT2-1:1                                             | Upregulated |
| A_33_P322 | 0.000647 | 0.0000267 | 2.87 | XPO5          | exportin 5                                                | Upregulated |
| A_19_P008 | 0.001462 | 0.000172  | 2.87 | KPNA4         | karyopherin alpha 4 (importin alpha 3)                    | Upregulated |
| A_24_P316 | 0.001674 | 0.000218  | 2.87 | AQR           | aquarius intron-binding spliceosomal factor               | Upregulated |
| A_24_P860 | 0.002308 | 0.00038   | 2.87 | PAIP2B        | poly(A) binding protein interacting protein 2B            | Upregulated |
| A_24_P836 | 0.002804 | 0.000511  | 2.87 | MMS22L        | MMS22-like, DNA repair protein                            | Upregulated |
| A_21_P001 | 0.005749 | 0.00149   | 2.87 | N6AMT1        | N-6 adenine-specific DNA methyltransferase 1 (putative)   | Upregulated |
| A_22_P000 | 0.006874 | 0.00192   | 2.87 | DHRS4-AS1     | DHRS4 antisense RNA 1                                     | Upregulated |
| A_33_P324 | 0.002868 | 0.000529  | 2.86 | CIZ1          | CDKN1A interacting zinc finger protein 1                  | Upregulated |
| A_24_P144 | 0.003032 | 0.000578  | 2.86 | RNF145        | ring finger protein 145                                   | Upregulated |
| A_22_P000 | 0.010028 | 0.00321   | 2.86 | lnc-C6orf228- | lnc-C6orf228-3:1                                          | Upregulated |
| A_19_P008 | 0.000521 | 0.0000103 | 2.85 | CASC15        | cancer susceptibility candidate 15 (non-protein coding)   | Upregulated |
| A_33_P325 | 0.000603 | 0.0000224 | 2.85 | PDSS1         | prenyl (decaprenyl) diphosphate synthase, subunit 1       | Upregulated |
| A_23_P367 | 0.000848 | 0.0000542 | 2.85 | TAPBPL        | TAP binding protein-like                                  | Upregulated |



|           |          |           |      |              |                                                          |             |
|-----------|----------|-----------|------|--------------|----------------------------------------------------------|-------------|
| A_33_P322 | 0.001421 | 0.000163  | 2.85 | AKNA         | AT-hook transcription factor                             | Upregulated |
| A_23_P728 | 0.00356  | 0.000737  | 2.85 | ELMOD2       | ELMO/CED-12 domain containing 2                          | Upregulated |
| A_23_P137 | 0.000515 | 9.75E-06  | 2.84 | PIR          | pirin (iron-binding nuclear protein)                     | Upregulated |
| A_23_P133 | 0.000884 | 0.0000593 | 2.84 | CDK7         | cyclin-dependent kinase 7                                | Upregulated |
| A_23_P800 | 0.001589 | 0.000199  | 2.84 | E2F1         | E2F transcription factor 1                               | Upregulated |
| A_23_P257 | 0.002608 | 0.000459  | 2.84 | CENPB        | centromere protein B, 80kDa                              | Upregulated |
| A_33_P340 | 0.003079 | 0.00059   | 2.84 | MUC22        | mucin 22                                                 | Upregulated |
| A_24_P276 | 0.005388 | 0.00136   | 2.84 | SNIP1        | Smad nuclear interacting protein 1                       | Upregulated |
| A_21_P000 | 0.005683 | 0.00146   | 2.84 | LRRC75A-AS   | LRRC75A antisense RNA 1                                  | Upregulated |
| A_24_P694 | 0.009539 | 0.003     | 2.84 | lnc-ZNF236-1 | lnc-ZNF236-1:5                                           | Upregulated |
| A_23_P351 | 0.000521 | 0.0000103 | 2.83 | SKIL         | SKI-like proto-oncogene                                  | Upregulated |
| A_33_P325 | 0.000675 | 0.0000293 | 2.83 | COG4         | component of oligomeric golgi complex 4                  | Upregulated |
| A_33_P333 | 0.001087 | 0.0000965 | 2.83 | ZNF669       | zinc finger protein 669                                  | Upregulated |
| A_24_P124 | 0.001157 | 0.00011   | 2.83 | VEGFA        | vascular endothelial growth factor A                     | Upregulated |
| A_23_P970 | 0.001532 | 0.000187  | 2.83 | FBXO6        | F-box protein 6                                          | Upregulated |
| A_33_P329 | 0.00275  | 0.000497  | 2.83 | HDAC8        | histone deacetylase 8                                    | Upregulated |
| A_33_P342 | 0.003843 | 0.000825  | 2.83 | ZNF790       | zinc finger protein 790                                  | Upregulated |
| A_33_P331 | 0.0141   | 0.00498   | 2.83 | FXN          | frataxin                                                 | Upregulated |
| A_23_P252 | 0.000527 | 0.000013  | 2.82 | SCAP         | SREBF chaperone                                          | Upregulated |
| A_23_P122 | 0.000555 | 0.0000153 | 2.82 | ZSCAN9       | zinc finger and SCAN domain containing 9                 | Upregulated |
| A_21_P001 | 0.00056  | 0.0000156 | 2.82 | lnc-MRPL39-4 | lnc-MRPL39-4:1                                           | Upregulated |
| A_23_P159 | 0.00075  | 0.0000405 | 2.82 | SLC35E3      | solute carrier family 35, member E3                      | Upregulated |
| A_33_P324 | 0.001162 | 0.000112  | 2.82 | MNT          | MAX network transcriptional repressor                    | Upregulated |
| A_22_P000 | 0.002568 | 0.000448  | 2.82 | HPYR1        | Helicobacter pylori responsive 1 (non-protein coding)    | Upregulated |
| A_33_P325 | 0.002832 | 0.000519  | 2.82 | VSIG10       | V-set and immunoglobulin domain containing 10            | Upregulated |
| A_24_P392 | 0.004383 | 0.001     | 2.82 | ING1         | inhibitor of growth family, member 1                     | Upregulated |
| A_24_P998 | 0.000515 | 9.33E-06  | 2.81 | ZNF223       | zinc finger protein 223                                  | Upregulated |
| A_23_P528 | 0.000555 | 0.0000153 | 2.81 | BUD13        | BUD13 homolog (S. cerevisiae)                            | Upregulated |
| A_24_P145 | 0.00121  | 0.000121  | 2.81 | SERINC2      | serine incorporator 2                                    | Upregulated |
| A_32_P779 | 0.00189  | 0.000271  | 2.81 | UTP11L       | UTP11-like, U3 small nucleolar ribonucleoprotein (yeast) | Upregulated |
| A_24_P184 | 0.003094 | 0.000596  | 2.81 | CHD2         | chromodomain helicase DNA binding protein 2              | Upregulated |
| A_32_P151 | 0.000521 | 0.0000106 | 2.8  | KRT18        | keratin 18, type I                                       | Upregulated |
| A_23_P210 | 0.000686 | 0.0000301 | 2.8  | LGALSL       | lectin, galactoside-binding-like                         | Upregulated |
| A_23_P138 | 0.000961 | 0.000072  | 2.8  | CAPN1        | calpain 1, (mu/l) large subunit                          | Upregulated |
| A_23_P416 | 0.000526 | 0.0000126 | 2.79 | JADE2        | jade family PHD finger 2                                 | Upregulated |
| A_23_P164 | 0.000537 | 0.0000142 | 2.79 | RNASEH2A     | ribonuclease H2, subunit A                               | Upregulated |
| A_22_P000 | 0.001525 | 0.000186  | 2.79 | lnc-DERA-1   | lnc-DERA-1:3                                             | Upregulated |

|           |          |           |      |               |                                                                                |             |
|-----------|----------|-----------|------|---------------|--------------------------------------------------------------------------------|-------------|
| A_23_P133 | 0.001983 | 0.000296  | 2.79 | GPANK1        | G patch domain and ankyrin repeats 1                                           | Upregulated |
| A_23_P418 | 0.002101 | 0.000327  | 2.79 | BCL2L2        | BCL2-like 2                                                                    | Upregulated |
| A_23_P256 | 0.002166 | 0.000345  | 2.79 | FAM167A-AS    | FAM167A antisense RNA 1                                                        | Upregulated |
| A_23_P145 | 0.003343 | 0.000672  | 2.79 | DNAH8         | dynein, axonemal, heavy chain 8                                                | Upregulated |
| A_33_P340 | 0.005545 | 0.00141   | 2.79 | VAMP4         | vesicle-associated membrane protein 4                                          | Upregulated |
| A_23_P153 | 0.000575 | 0.0000176 | 2.78 | ZNF492        | zinc finger protein 492                                                        | Upregulated |
| A_23_P136 | 0.000602 | 0.0000219 | 2.78 | FBXO8         | F-box protein 8                                                                | Upregulated |
| A_21_P000 | 0.000755 | 0.0000412 | 2.78 | SNORD104      | small nucleolar RNA, C/D box 104                                               | Upregulated |
| A_23_P124 | 0.000781 | 0.0000445 | 2.78 | FER           | fer (fps/fes related) tyrosine kinase                                          | Upregulated |
| A_22_P000 | 0.000781 | 0.0000445 | 2.78 | lnc-DUOX2-2   | lnc-DUOX2-2:1                                                                  | Upregulated |
| A_23_P336 | 0.000912 | 0.0000636 | 2.78 | TOR1AIP2      | torsin A interacting protein 2                                                 | Upregulated |
| A_33_P336 | 0.001032 | 0.0000853 | 2.78 | STAMPB        | STAM binding protein                                                           | Upregulated |
| A_21_P001 | 0.001303 | 0.000139  | 2.78 | TNPO1         | transportin 1                                                                  | Upregulated |
| A_24_P355 | 0.001626 | 0.000208  | 2.78 | SLC25A25      | solute carrier family 25 (mitochondrial carrier; phosphate carrier), member 25 | Upregulated |
| A_22_P000 | 0.004073 | 0.000895  | 2.78 | HMBOX1        | homeobox containing 1                                                          | Upregulated |
| A_23_P120 | 0.005219 | 0.00129   | 2.78 | TASP1         | taspase, threonine aspartase, 1                                                | Upregulated |
| A_23_P825 | 0.008351 | 0.00251   | 2.78 | PEG10         | paternally expressed 10                                                        | Upregulated |
| A_33_P352 | 0.009659 | 0.00305   | 2.78 | KDM2B         | lysine (K)-specific demethylase 2B                                             | Upregulated |
| A_32_P103 | 0.000521 | 0.0000107 | 2.77 | FAM92A1       | family with sequence similarity 92, member A1                                  | Upregulated |
| A_24_P729 | 0.000525 | 0.0000115 | 2.77 | AGAP9         | ArfGAP with GTPase domain, ankyrin repeat and PH domain 9                      | Upregulated |
| A_23_P133 | 0.000527 | 0.0000128 | 2.77 | SLC29A1       | solute carrier family 29 (equilibrative nucleoside transporter), member 1      | Upregulated |
| A_24_P229 | 0.000577 | 0.0000182 | 2.77 | ARRDC2        | arrestin domain containing 2                                                   | Upregulated |
| A_33_P335 | 0.000597 | 0.0000212 | 2.77 | SIAH2         | siah E3 ubiquitin protein ligase 2                                             | Upregulated |
| A_19_P008 | 0.000883 | 0.0000591 | 2.77 | NUDT3         | nudix (nucleoside diphosphate linked moiety X)-type motif 3                    | Upregulated |
| A_22_P000 | 0.001013 | 0.000082  | 2.77 | lnc-C13orf15- | lnc-C13orf15-1:1                                                               | Upregulated |
| A_33_P321 | 0.001139 | 0.000107  | 2.77 | PRKRIR        | protein-kinase, interferon-inducible double stranded RNA dependent inhibitor 1 | Upregulated |
| A_22_P000 | 0.003094 | 0.000595  | 2.77 | MIR17HG       | miR-17-92 cluster host gene (non-protein coding)                               | Upregulated |
| A_23_P126 | 0.005267 | 0.00131   | 2.77 | CENPL         | centromere protein L                                                           | Upregulated |
| A_23_P433 | 0.000526 | 0.0000121 | 2.76 | SPRTN         | SprT-like N-terminal domain                                                    | Upregulated |
| A_33_P338 | 0.000526 | 0.0000122 | 2.76 | SFMBT2        | Scm-like with four mbt domains 2                                               | Upregulated |
| A_33_P331 | 0.000526 | 0.0000123 | 2.76 | AHR           | aryl hydrocarbon receptor                                                      | Upregulated |
| A_21_P000 | 0.000709 | 0.0000351 | 2.76 | lnc-KIAA1383  | lnc-KIAA1383-1:1                                                               | Upregulated |
| A_23_P792 | 0.001122 | 0.000104  | 2.76 | ACVR1         | activin A receptor, type I                                                     | Upregulated |
| A_24_P548 | 0.001763 | 0.00024   | 2.76 | KLHL8         | kelch-like family member 8                                                     | Upregulated |
| A_24_P161 | 0.009311 | 0.0029    | 2.76 | SPDYE2        | speedy/RINGO cell cycle regulator family member E2                             | Upregulated |
| A_33_P326 | 0.00056  | 0.0000165 | 2.75 | CDK8          | cyclin-dependent kinase 8                                                      | Upregulated |
| A_23_P409 | 0.000645 | 0.0000264 | 2.75 | POLR1D        | polymerase (RNA) I polypeptide D, 16kDa                                        | Upregulated |

|           |          |           |      |                                |                                                   |             |
|-----------|----------|-----------|------|--------------------------------|---------------------------------------------------|-------------|
| A_23_P119 | 0.000646 | 0.0000265 | 2.75 | KEAP1                          | kelch-like ECH-associated protein 1               | Upregulated |
| A_21_P001 | 0.000809 | 0.0000491 | 2.75 | lnc-MAPK8IP1;lnc-MAPK8IP2-1:14 |                                                   | Upregulated |
| A_21_P000 | 0.002944 | 0.00055   | 2.75 | LOC1027246                     | uncharacterized LOC102724687                      | Upregulated |
| A_23_P257 | 0.000603 | 0.0000225 | 2.74 | LOH12CR1                       | loss of heterozygosity, 12, chromosomal region 1  | Upregulated |
| A_23_P306 | 0.000995 | 0.000079  | 2.74 | CXorf40B                       | chromosome X open reading frame 40B               | Upregulated |
| A_23_P165 | 0.001062 | 0.0000906 | 2.74 | FARSB                          | phenylalanyl-tRNA synthetase, beta subunit        | Upregulated |
| A_24_P336 | 0.001198 | 0.000118  | 2.74 | HTRA2                          | HtrA serine peptidase 2                           | Upregulated |
| A_33_P326 | 0.00187  | 0.000267  | 2.74 | ZFAT                           | zinc finger and AT hook domain containing         | Upregulated |
| A_23_P696 | 0.00195  | 0.000286  | 2.74 | OTUD4                          | OTU deubiquitinase 4                              | Upregulated |
| A_32_P719 | 0.003355 | 0.000675  | 2.74 | DSTYK                          | dual serine/threonine and tyrosine protein kinase | Upregulated |
| A_22_P000 | 0.000526 | 0.0000123 | 2.73 | MT1B                           | metallothionein 1B                                | Upregulated |
| A_24_P361 | 0.000526 | 0.0000126 | 2.73 | PROSER3                        | proline and serine rich 3                         | Upregulated |
| A_23_P207 | 0.000705 | 0.0000333 | 2.73 | RBM18                          | RNA binding motif protein 18                      | Upregulated |
| A_21_P000 | 0.000939 | 0.0000679 | 2.73 | ADORA2A-AS1                    | ADORA2A antisense RNA 1                           | Upregulated |
| A_33_P339 | 0.001321 | 0.000142  | 2.73 | FAM178A                        | family with sequence similarity 178, member A     | Upregulated |
| A_21_P001 | 0.001462 | 0.000172  | 2.73 | BMS1P5                         | BMS1 pseudogene 5                                 | Upregulated |
| A_23_P657 | 0.001689 | 0.000222  | 2.73 | MCTP2                          | multiple C2 domains, transmembrane 2              | Upregulated |
| A_24_P693 | 0.001747 | 0.000236  | 2.73 | CASD1                          | CAS1 domain containing 1                          | Upregulated |
| A_23_P171 | 0.002118 | 0.000333  | 2.73 | MAL                            | mal, T-cell differentiation protein               | Upregulated |
| A_33_P325 | 0.0033   | 0.000659  | 2.73 | CMA1                           | chymase 1, mast cell                              | Upregulated |
| A_22_P000 | 0.005359 | 0.00135   | 2.73 | LOC439933                      | uncharacterized LOC439933                         | Upregulated |
| A_22_P000 | 0.007735 | 0.00226   | 2.73 | lnc-RP11-366                   | lnc-RP11-366L20.2.1-1:1                           | Upregulated |
| A_23_P668 | 0.010804 | 0.00352   | 2.73 | GEMIN4                         | gem (nuclear organelle) associated protein 4      | Upregulated |
| A_22_P000 | 0.000525 | 0.0000111 | 2.72 | lnc-LENG9-1                    | lnc-LENG9-1:3                                     | Upregulated |
| A_23_P203 | 0.00056  | 0.0000159 | 2.72 | API5                           | apoptosis inhibitor 5                             | Upregulated |
| A_22_P000 | 0.000646 | 0.0000265 | 2.72 | lnc-TRAPPC4                    | lnc-TRAPPC4-1:1                                   | Upregulated |
| A_21_P000 | 0.000866 | 0.0000572 | 2.72 | lnc-HIST1H2A1                  | lnc-HIST1H2AI-2:1                                 | Upregulated |
| A_24_P743 | 0.003909 | 0.000845  | 2.72 | BBIP1                          | BBSome interacting protein 1                      | Upregulated |
| A_24_P198 | 0.006469 | 0.00177   | 2.72 | CDK12                          | cyclin-dependent kinase 12                        | Upregulated |
| A_23_P131 | 0.000526 | 0.0000118 | 2.71 | C2orf47                        | chromosome 2 open reading frame 47                | Upregulated |
| A_23_P126 | 0.000597 | 0.0000213 | 2.71 | KIF21B                         | kinesin family member 21B                         | Upregulated |
| A_23_P215 | 0.00063  | 0.000025  | 2.71 | WDR91                          | WD repeat domain 91                               | Upregulated |
| A_24_P320 | 0.000695 | 0.0000317 | 2.71 | TRMT44                         | tRNA methyltransferase 44 homolog (S. cerevisiae) | Upregulated |
| A_33_P332 | 0.000707 | 0.0000342 | 2.71 | BMP2K                          | BMP2 inducible kinase                             | Upregulated |
| A_23_P279 | 0.000709 | 0.0000349 | 2.71 | PDCD2L                         | programmed cell death 2-like                      | Upregulated |
| A_21_P000 | 0.004962 | 0.0012    | 2.71 | SNORD52                        | small nucleolar RNA, C/D box 52                   | Upregulated |
| A_22_P000 | 0.000532 | 0.0000132 | 2.7  | LINC00851                      | long intergenic non-protein coding RNA 851        | Upregulated |

|           |          |           |      |              |                                                                         |             |
|-----------|----------|-----------|------|--------------|-------------------------------------------------------------------------|-------------|
| A_21_P001 | 0.001851 | 0.000262  | 2.7  | LOC1019292   | uncharacterized LOC101929266                                            | Upregulated |
| A_23_P638 | 0.001873 | 0.000267  | 2.7  | SAMD8        | sterile alpha motif domain containing 8                                 | Upregulated |
| A_23_P325 | 0.003667 | 0.000769  | 2.7  | ZNF134       | zinc finger protein 134                                                 | Upregulated |
| A_24_P332 | 0.007718 | 0.00225   | 2.7  | SSH1         | slingshot protein phosphatase 1                                         | Upregulated |
| A_23_P120 | 0.000578 | 0.0000187 | 2.69 | SPEN         | spen family transcriptional repressor                                   | Upregulated |
| A_22_P000 | 0.001265 | 0.000132  | 2.69 | lnc-AC092295 | lnc-AC092295.7.1-2:1                                                    | Upregulated |
| A_33_P330 | 0.001328 | 0.000144  | 2.69 | STRADB       | STE20-related kinase adaptor beta                                       | Upregulated |
| A_22_P000 | 0.001469 | 0.000173  | 2.69 | lnc-EFCAB5-1 | lnc-EFCAB5-1:1                                                          | Upregulated |
| A_33_P322 | 0.00429  | 0.00097   | 2.69 | STK17A       | serine/threonine kinase 17a                                             | Upregulated |
| A_24_P372 | 0.006054 | 0.0016    | 2.69 | RNF141       | ring finger protein 141                                                 | Upregulated |
| A_23_P110 | 0.000639 | 0.0000257 | 2.68 | MGST2        | microsomal glutathione S-transferase 2                                  | Upregulated |
| A_33_P324 | 0.003304 | 0.000661  | 2.68 | RAPGEF6      | Rap guanine nucleotide exchange factor (GEF) 6                          | Upregulated |
| A_19_P003 | 0.004274 | 0.000965  | 2.68 | lnc-NR5A2-1  | lnc-NR5A2-1:2                                                           | Upregulated |
| A_33_P324 | 0.008398 | 0.00253   | 2.68 | LOC606724    | coronin, actin binding protein, 1A pseudogene                           | Upregulated |
| A_33_P337 | 0.010065 | 0.00322   | 2.68 | FAM196B      | family with sequence similarity 196, member B                           | Upregulated |
| A_32_P306 | 0.012752 | 0.00437   | 2.68 | ETV5         | ets variant 5                                                           | Upregulated |
| A_24_P918 | 0.001595 | 0.0002    | 2.67 | TMTC3        | transmembrane and tetratricopeptide repeat containing 3                 | Upregulated |
| A_24_P380 | 0.001826 | 0.000256  | 2.67 | LSMEM1       | leucine-rich single-pass membrane protein 1                             | Upregulated |
| A_23_P135 | 0.003966 | 0.000863  | 2.67 | AFG3L2       | AFG3-like AAA ATPase 2                                                  | Upregulated |
| A_23_P250 | 0.005296 | 0.00132   | 2.67 | PRKCE        | protein kinase C, epsilon                                               | Upregulated |
| A_23_P376 | 0.000526 | 0.0000116 | 2.66 | TNF          | tumor necrosis factor                                                   | Upregulated |
| A_23_P192 | 0.000526 | 0.0000127 | 2.66 | TUBB2A       | tubulin, beta 2A class IIa                                              | Upregulated |
| A_22_P000 | 0.000529 | 0.000013  | 2.66 | lnc-LOH12CR  | lnc-LOH12CR1-1:1                                                        | Upregulated |
| A_23_P129 | 0.000581 | 0.0000197 | 2.66 | IL4          | interleukin 4                                                           | Upregulated |
| A_23_P255 | 0.000775 | 0.0000437 | 2.66 | LHFPL2       | lipoma HMGIC fusion partner-like 2                                      | Upregulated |
| A_33_P325 | 0.002499 | 0.000429  | 2.66 | ST6GALNAC1   | ST6 (alpha-N-acetyl-neuraminyl-2,3-beta-galactosyl-1,3)-N-acetylgalacto | Upregulated |
| A_24_P158 | 0.002989 | 0.000564  | 2.66 | DTX4         | deltex 4, E3 ubiquitin ligase                                           | Upregulated |
| A_33_P324 | 0.009077 | 0.00281   | 2.66 | IGFL3        | IGF-like family member 3                                                | Upregulated |
| A_21_P000 | 0.010702 | 0.00348   | 2.66 | SEC24B-AS1   | SEC24B antisense RNA 1                                                  | Upregulated |
| A_21_P001 | 0.00056  | 0.0000161 | 2.65 | NUTM2B-AS1   | NUTM2B antisense RNA 1                                                  | Upregulated |
| A_23_P133 | 0.00072  | 0.0000371 | 2.65 | RIOK2        | RIO kinase 2                                                            | Upregulated |
| A_22_P000 | 0.000788 | 0.0000459 | 2.65 | LMO7-AS1     | LMO7 antisense RNA 1                                                    | Upregulated |
| A_23_P208 | 0.001043 | 0.0000873 | 2.65 | ADCK4        | aarF domain containing kinase 4                                         | Upregulated |
| A_24_P759 | 0.00124  | 0.000126  | 2.65 | APOL6        | apolipoprotein L, 6                                                     | Upregulated |
| A_21_P000 | 0.003687 | 0.000776  | 2.65 | LARGE-AS1    | LARGE antisense RNA 1                                                   | Upregulated |
| A_24_P918 | 0.00509  | 0.00124   | 2.65 | WHAMMP3      | WAS protein homolog associated with actin, golgi membranes and micr     | Upregulated |
| A_23_P343 | 0.000563 | 0.0000168 | 2.64 | RSRP1        | arginine/serine-rich protein 1                                          | Upregulated |

|           |          |           |      |                |                                                               |             |
|-----------|----------|-----------|------|----------------|---------------------------------------------------------------|-------------|
| A_19_P003 | 0.000635 | 0.0000253 | 2.64 | PPP4R1L        | protein phosphatase 4, regulatory subunit 1-like (pseudogene) | Upregulated |
| A_23_P718 | 0.000695 | 0.0000312 | 2.64 | PBX3           | pre-B-cell leukemia homeobox 3                                | Upregulated |
| A_24_P317 | 0.000788 | 0.0000458 | 2.64 | TMEM8B         | transmembrane protein 8B                                      | Upregulated |
| A_23_P414 | 0.001226 | 0.000124  | 2.64 | FLCN           | folliculin                                                    | Upregulated |
| A_33_P326 | 0.004254 | 0.000958  | 2.64 | PAAF1          | proteasomal ATPase-associated factor 1                        | Upregulated |
| A_23_P716 | 0.004786 | 0.00114   | 2.64 | PAX5           | paired box 5                                                  | Upregulated |
| A_24_P128 | 0.000575 | 0.0000176 | 2.63 | ATF2           | activating transcription factor 2                             | Upregulated |
| A_23_P153 | 0.001462 | 0.000172  | 2.63 | TGIF1          | TGFB-induced factor homeobox 1                                | Upregulated |
| A_23_P256 | 0.002757 | 0.000499  | 2.63 | VBP1           | von Hippel-Lindau binding protein 1                           | Upregulated |
| A_33_P333 | 0.000526 | 0.000012  | 2.62 | SEC61A2        | Sec61 alpha 2 subunit ( <i>S. cerevisiae</i> )                | Upregulated |
| A_33_P341 | 0.000575 | 0.0000177 | 2.62 | AIG1           | androgen-induced 1                                            | Upregulated |
| A_23_P364 | 0.000814 | 0.0000499 | 2.62 | SLX4IP         | SLX4 interacting protein                                      | Upregulated |
| A_23_P365 | 0.000963 | 0.0000727 | 2.62 | PRKAG1         | protein kinase, AMP-activated, gamma 1 non-catalytic subunit  | Upregulated |
| A_24_P318 | 0.00097  | 0.0000739 | 2.62 | RPUSD4         | RNA pseudouridylylase synthase domain containing 4            | Upregulated |
| A_23_P109 | 0.001023 | 0.000084  | 2.62 | ZBTB11         | zinc finger and BTB domain containing 11                      | Upregulated |
| A_24_P296 | 0.001714 | 0.000229  | 2.62 | LINC00052      | long intergenic non-protein coding RNA 52                     | Upregulated |
| A_33_P339 | 0.001873 | 0.000267  | 2.62 | FAM188A        | family with sequence similarity 188, member A                 | Upregulated |
| A_33_P327 | 0.00275  | 0.000497  | 2.62 | GOSR1          | golgi SNAP receptor complex member 1                          | Upregulated |
| A_23_P569 | 0.004115 | 0.000909  | 2.62 | REL            | v-rel avian reticuloendotheliosis viral oncogene homolog      | Upregulated |
| A_33_P330 | 0.005749 | 0.00149   | 2.62 | TLE4           | transducin-like enhancer of split 4                           | Upregulated |
| A_23_P204 | 0.005796 | 0.00151   | 2.62 | CAB39L         | calcium binding protein 39-like                               | Upregulated |
| A_22_P000 | 0.000577 | 0.0000184 | 2.61 | LOC1027238     | uncharacterized LOC102723809                                  | Upregulated |
| A_24_P454 | 0.000582 | 0.0000198 | 2.61 | XCL1           | chemokine (C motif) ligand 1                                  | Upregulated |
| A_23_P136 | 0.00072  | 0.000037  | 2.61 | WIPF2          | WAS/WASL interacting protein family, member 2                 | Upregulated |
| A_23_P150 | 0.000899 | 0.0000611 | 2.61 | RPP38          | ribonuclease P/MRP 38kDa subunit                              | Upregulated |
| A_23_P896 | 0.001643 | 0.000212  | 2.61 | IL7            | interleukin 7                                                 | Upregulated |
| A_33_P326 | 0.002931 | 0.000547  | 2.61 | ZNF280B        | zinc finger protein 280B                                      | Upregulated |
| A_22_P000 | 0.007492 | 0.00216   | 2.61 | lnc-DDX31-1    | lnc-DDX31-1:1                                                 | Upregulated |
| A_33_P323 | 0.008491 | 0.00257   | 2.61 | FBXL18         | F-box and leucine-rich repeat protein 18                      | Upregulated |
| A_23_P710 | 0.010451 | 0.00338   | 2.61 | IL6            | interleukin 6                                                 | Upregulated |
| A_33_P336 | 0.000577 | 0.0000186 | 2.6  | P2RX4          | purinergic receptor P2X, ligand gated ion channel, 4          | Upregulated |
| A_23_P420 | 0.000578 | 0.0000187 | 2.6  | NOD2           | nucleotide-binding oligomerization domain containing 2        | Upregulated |
| A_23_P980 | 0.000641 | 0.000026  | 2.6  | CUTC           | cutC copper transporter                                       | Upregulated |
| A_23_P145 | 0.000684 | 0.00003   | 2.6  | TSPAN12        | tetraspanin 12                                                | Upregulated |
| A_21_P001 | 0.002024 | 0.000307  | 2.6  | XLOC_I2_005997 |                                                               | Upregulated |
| A_33_P336 | 0.012007 | 0.00405   | 2.6  | PRPF31         | pre-mRNA processing factor 31                                 | Upregulated |
| A_22_P000 | 0.000707 | 0.0000337 | 2.59 | lnc-KCNJ4-2    | lnc-KCNJ4-2:1                                                 | Upregulated |

|           |          |           |      |              |                                                                  |             |
|-----------|----------|-----------|------|--------------|------------------------------------------------------------------|-------------|
| A_33_P328 | 0.000783 | 0.0000449 | 2.59 | CDPF1        | cysteine-rich, DPF motif domain containing 1                     | Upregulated |
| A_33_P332 | 0.000938 | 0.0000678 | 2.59 | SGPL1        | sphingosine-1-phosphate lyase 1                                  | Upregulated |
| A_22_P000 | 0.000954 | 0.0000705 | 2.59 | lnc-COIL-3   | lnc-COIL-3:1                                                     | Upregulated |
| A_33_P323 | 0.004433 | 0.00102   | 2.59 | LOC257396    | uncharacterized LOC257396                                        | Upregulated |
| A_33_P323 | 0.005187 | 0.00128   | 2.59 | LINC01144    | long intergenic non-protein coding RNA 1144                      | Upregulated |
| A_23_P104 | 0.000578 | 0.0000192 | 2.58 | VPS51        | vacuolar protein sorting 51 homolog (S. cerevisiae)              | Upregulated |
| A_23_P421 | 0.000648 | 0.0000269 | 2.58 | TNFAIP2      | tumor necrosis factor, alpha-induced protein 2                   | Upregulated |
| A_33_P333 | 0.001291 | 0.000137  | 2.58 | SNORA62      | small nucleolar RNA, H/ACA box 62                                | Upregulated |
| A_23_P107 | 0.003847 | 0.000826  | 2.58 | CEP76        | centrosomal protein 76kDa                                        | Upregulated |
| A_24_P929 | 0.000601 | 0.0000217 | 2.57 | AP4E1        | adaptor-related protein complex 4, epsilon 1 subunit             | Upregulated |
| A_23_P135 | 0.000658 | 0.0000275 | 2.57 | PPP2R2D      | protein phosphatase 2, regulatory subunit B, delta               | Upregulated |
| A_33_P327 | 0.001015 | 0.0000824 | 2.57 | ZNF75A       | zinc finger protein 75a                                          | Upregulated |
| A_21_P000 | 0.001612 | 0.000205  | 2.57 | LHX4-AS1     | LHX4 antisense RNA 1                                             | Upregulated |
| A_33_P333 | 0.00204  | 0.000312  | 2.57 | LOC1001298   | uncharacterized LOC100129846                                     | Upregulated |
| A_21_P000 | 0.00356  | 0.000737  | 2.57 | lnc-APLN-1   | lnc-APLN-1:1                                                     | Upregulated |
| A_33_P336 | 0.000532 | 0.0000134 | 2.56 | TUBB2A       | tubulin, beta 2A class IIa                                       | Upregulated |
| A_32_P701 | 0.000538 | 0.0000143 | 2.56 | TSPAN15      | tetraspanin 15                                                   | Upregulated |
| A_22_P000 | 0.000559 | 0.0000154 | 2.56 | lnc-ERMP1-1  | lnc-ERMP1-1:1                                                    | Upregulated |
| A_23_P206 | 0.000575 | 0.0000178 | 2.56 | USP31        | ubiquitin specific peptidase 31                                  | Upregulated |
| A_23_P349 | 0.000578 | 0.0000189 | 2.56 | RIMKLA       | ribosomal modification protein rimK-like family member A         | Upregulated |
| A_33_P328 | 0.000848 | 0.0000544 | 2.56 | CDPF1        | cysteine-rich, DPF motif domain containing 1                     | Upregulated |
| A_33_P329 | 0.000904 | 0.0000617 | 2.56 | CDKN2C       | cyclin-dependent kinase inhibitor 2C (p18, inhibits CDK4)        | Upregulated |
| A_23_P146 | 0.00097  | 0.0000739 | 2.56 | BAG4         | BCL2-associated athanogene 4                                     | Upregulated |
| A_21_P000 | 0.001278 | 0.000135  | 2.56 | lnc-XRCC2-2  | lnc-XRCC2-2:1                                                    | Upregulated |
| A_22_P000 | 0.001606 | 0.000203  | 2.56 | lnc-ZBTB10-3 | lnc-ZBTB10-3:1                                                   | Upregulated |
| A_23_P122 | 0.002101 | 0.000327  | 2.56 | GFOD1        | glucose-fructose oxidoreductase domain containing 1              | Upregulated |
| A_23_P784 | 0.002505 | 0.000431  | 2.56 | ZNF350       | zinc finger protein 350                                          | Upregulated |
| A_32_P444 | 0.000578 | 0.000019  | 2.55 | INPP1        | inositol polyphosphate-1-phosphatase                             | Upregulated |
| A_24_P130 | 0.000603 | 0.0000222 | 2.55 | LDLRAD4      | low density lipoprotein receptor class A domain containing 4     | Upregulated |
| A_23_P204 | 0.000654 | 0.0000272 | 2.55 | NDRG1        | N-myc downstream regulated 1                                     | Upregulated |
| A_32_P112 | 0.000853 | 0.000055  | 2.55 | FAM27E2      | family with sequence similarity 27, member E2                    | Upregulated |
| A_24_P150 | 0.000938 | 0.0000672 | 2.55 | GNA13        | guanine nucleotide binding protein (G protein), alpha 13         | Upregulated |
| A_23_P160 | 0.001291 | 0.000137  | 2.55 | GLMN         | glomulin, FKBP associated protein                                | Upregulated |
| A_32_P831 | 0.005846 | 0.00152   | 2.55 | BRI3BP       | BRI3 binding protein                                             | Upregulated |
| A_23_P301 | 0.013704 | 0.0048    | 2.55 | KLF3-AS1     | KLF3 antisense RNA 1                                             | Upregulated |
| A_32_P840 | 0.000561 | 0.0000166 | 2.54 | TIMM23B      | translocase of inner mitochondrial membrane 23 homolog B (yeast) | Upregulated |
| A_23_P365 | 0.000566 | 0.0000171 | 2.54 | BCKDK        | branched chain ketoacid dehydrogenase kinase                     | Upregulated |

|           |          |           |      |                |                                                                       |             |
|-----------|----------|-----------|------|----------------|-----------------------------------------------------------------------|-------------|
| A_23_P503 | 0.001176 | 0.000114  | 2.54 | SLC24A4        | solute carrier family 24 (sodium/potassium/calcium exchanger), member | Upregulated |
| A_23_P139 | 0.001522 | 0.000185  | 2.54 | SERPING1       | serpin peptidase inhibitor, clade G (C1 inhibitor), member 1          | Upregulated |
| A_19_P003 | 0.001709 | 0.000229  | 2.54 | SNHG11         | small nucleolar RNA host gene 11 (non-protein coding)                 | Upregulated |
| A_33_P323 | 0.001733 | 0.000233  | 2.54 | PIP5KL1        | phosphatidylinositol-4-phosphate 5-kinase-like 1                      | Upregulated |
| A_24_P416 | 0.001962 | 0.000291  | 2.54 | KIAA0195       | KIAA0195                                                              | Upregulated |
| A_33_P321 | 0.003393 | 0.000687  | 2.54 | LINC01061      | long intergenic non-protein coding RNA 1061                           | Upregulated |
| A_23_P737 | 0.004528 | 0.00105   | 2.54 | LAGE3          | L antigen family, member 3                                            | Upregulated |
| A_23_P251 | 0.005487 | 0.00139   | 2.54 | GPC2           | glypican 2                                                            | Upregulated |
| A_21_P000 | 0.015102 | 0.00547   | 2.54 | TTF2           | transcription termination factor, RNA polymerase II                   | Upregulated |
| A_21_P001 | 0.00056  | 0.0000161 | 2.53 | XLOC_I2_015596 |                                                                       | Upregulated |
| A_23_P162 | 0.000577 | 0.0000183 | 2.53 | CCDC91         | coiled-coil domain containing 91                                      | Upregulated |
| A_33_P333 | 0.000701 | 0.0000328 | 2.53 | FCRL5          | Fc receptor-like 5                                                    | Upregulated |
| A_23_P201 | 0.000758 | 0.0000414 | 2.53 | SNX27          | sorting nexin family member 27                                        | Upregulated |
| A_22_P000 | 0.000837 | 0.0000526 | 2.53 | lnc-SYN3-4     | lnc-SYN3-4:1                                                          | Upregulated |
| A_22_P000 | 0.000945 | 0.0000689 | 2.53 | lnc-COG3-2     | lnc-COG3-2:1                                                          | Upregulated |
| A_23_P261 | 0.000963 | 0.0000725 | 2.53 | DET1           | de-etiolated homolog 1 (Arabidopsis)                                  | Upregulated |
| A_23_P461 | 0.001349 | 0.000148  | 2.53 | MED8           | mediator complex subunit 8                                            | Upregulated |
| A_33_P330 | 0.001784 | 0.000245  | 2.53 | MRPL32         | mitochondrial ribosomal protein L32                                   | Upregulated |
| A_24_P290 | 0.008968 | 0.00276   | 2.53 | FAM86B3P       | family with sequence similarity 86, member A pseudogene               | Upregulated |
| A_22_P000 | 0.01127  | 0.00373   | 2.53 | lnc-PHF3-2     | lnc-PHF3-2:1                                                          | Upregulated |
| A_33_P334 | 0.00056  | 0.0000158 | 2.52 | SOCS4          | suppressor of cytokine signaling 4                                    | Upregulated |
| A_24_P337 | 0.000991 | 0.000077  | 2.52 | DCTD           | dCMP deaminase                                                        | Upregulated |
| A_23_P278 | 0.001098 | 0.0000985 | 2.52 | GPATCH1        | G patch domain containing 1                                           | Upregulated |
| A_21_P000 | 0.001098 | 0.0000985 | 2.52 | lnc-PLEKHA5    | lnc-PLEKHA5-4:1                                                       | Upregulated |
| A_23_P467 | 0.001158 | 0.000111  | 2.52 | ERF            | Ets2 repressor factor                                                 | Upregulated |
| A_23_P371 | 0.001353 | 0.000149  | 2.52 | KLF12          | Kruppel-like factor 12                                                | Upregulated |
| A_23_P972 | 0.00067  | 0.0000288 | 2.51 | ZNF691         | zinc finger protein 691                                               | Upregulated |
| A_22_P000 | 0.001009 | 0.0000815 | 2.51 | LOC1049683     | ncRNA                                                                 | Upregulated |
| A_23_P404 | 0.001054 | 0.0000895 | 2.51 | GRPEL2         | GrpE-like 2, mitochondrial (E. coli)                                  | Upregulated |
| A_33_P335 | 0.001222 | 0.000123  | 2.51 | ARG1           | arginase 1                                                            | Upregulated |
| A_24_P208 | 0.001693 | 0.000223  | 2.51 | IL18R1         | interleukin 18 receptor 1                                             | Upregulated |
| A_32_P760 | 0.002078 | 0.000321  | 2.51 | CTDSPL2        | CTD (carboxy-terminal domain, RNA polymerase II, polypeptide A) small | Upregulated |
| A_33_P339 | 0.003549 | 0.000733  | 2.51 | lnc-PCSK1N-    | lnc-PCSK1N-1:1                                                        | Upregulated |
| A_19_P003 | 0.005278 | 0.00132   | 2.51 | LINC00882      | long intergenic non-protein coding RNA 882                            | Upregulated |
| A_23_P360 | 0.012751 | 0.00437   | 2.51 | PLD6           | phospholipase D family, member 6                                      | Upregulated |
| A_33_P341 | 0.012906 | 0.00444   | 2.51 | TRIM16         | tripartite motif containing 16                                        | Upregulated |
| A_24_P140 | 0.000563 | 0.0000168 | 2.5  | NMT1           | N-myristoyltransferase 1                                              | Upregulated |

|           |          |           |      |                |                                                                       |             |
|-----------|----------|-----------|------|----------------|-----------------------------------------------------------------------|-------------|
| A_24_P128 | 0.000578 | 0.0000189 | 2.5  | ZNF79          | zinc finger protein 79                                                | Upregulated |
| A_23_P344 | 0.000594 | 0.0000209 | 2.5  | HDGFRP3        | hepatoma-derived growth factor, related protein 3                     | Upregulated |
| A_22_P000 | 0.00062  | 0.000024  | 2.5  | lnc-FOXN1-1    | lnc-FOXN1-1:1                                                         | Upregulated |
| A_23_P250 | 0.000991 | 0.000077  | 2.5  | LOC1019287     | uncharacterized LOC101928710                                          | Upregulated |
| A_23_P984 | 0.001188 | 0.000116  | 2.5  | SIDT2          | SID1 transmembrane family, member 2                                   | Upregulated |
| A_22_P000 | 0.002058 | 0.000316  | 2.5  | KIZ            | kizuna centrosomal protein                                            | Upregulated |
| A_23_P174 | 0.002319 | 0.000383  | 2.5  | PCED1A         | PC-esterase domain containing 1A                                      | Upregulated |
| A_24_P561 | 0.003041 | 0.000581  | 2.5  | CREBL2         | cAMP responsive element binding protein-like 2                        | Upregulated |
| A_23_P391 | 0.006915 | 0.00194   | 2.5  | PLXDC1         | plexin domain containing 1                                            | Upregulated |
| A_23_P102 | 0.00055  | 0.000015  | 2.49 | RSPH1          | radial spoke head 1 homolog (Chlamydomonas)                           | Upregulated |
| A_32_P182 | 0.000578 | 0.0000194 | 2.49 | AIDA           | axin interactor, dorsalization associated                             | Upregulated |
| A_23_P345 | 0.000585 | 0.00002   | 2.49 | GFPT1          | glutamine--fructose-6-phosphate transaminase 1                        | Upregulated |
| A_32_P158 | 0.000601 | 0.0000218 | 2.49 | LINC00998      | long intergenic non-protein coding RNA 998                            | Upregulated |
| A_23_P315 | 0.000695 | 0.0000311 | 2.49 | R3HDM4         | R3H domain containing 4                                               | Upregulated |
| A_24_P336 | 0.000695 | 0.0000316 | 2.49 | PNO1           | partner of NOB1 homolog (S. cerevisiae)                               | Upregulated |
| A_33_P326 | 0.001445 | 0.000169  | 2.49 | ZNF503         | zinc finger protein 503                                               | Upregulated |
| A_22_P000 | 0.002785 | 0.000506  | 2.49 | lnc-ZNHIT2-1   | lnc-ZNHIT2-1:1                                                        | Upregulated |
| A_23_P184 | 0.003258 | 0.000646  | 2.49 | PTPN13         | protein tyrosine phosphatase, non-receptor type 13 (APO-1/CD95 (Fas)) | Upregulated |
| A_33_P340 | 0.004102 | 0.000904  | 2.49 | TRAF4          | TNF receptor-associated factor 4                                      | Upregulated |
| A_23_P829 | 0.011739 | 0.00394   | 2.49 | OGN            | osteo glycin                                                          | Upregulated |
| A_23_P379 | 0.00056  | 0.0000164 | 2.48 | MT1B           | metallothionein 1B                                                    | Upregulated |
| A_24_P929 | 0.000578 | 0.0000193 | 2.48 | MKNK2          | MAP kinase interacting serine/threonine kinase 2                      | Upregulated |
| A_23_P341 | 0.000585 | 0.0000202 | 2.48 | POP1           | processing of precursor 1, ribonuclease P/MRP subunit (S. cerevisiae) | Upregulated |
| A_24_P416 | 0.000603 | 0.0000223 | 2.48 | APOL3          | apolipoprotein L, 3                                                   | Upregulated |
| A_32_P228 | 0.001555 | 0.000192  | 2.48 | PPP4R2         | protein phosphatase 4, regulatory subunit 2                           | Upregulated |
| A_23_P334 | 0.001559 | 0.000193  | 2.48 | B3GALNT2       | beta-1,3-N-acetylgalactosaminyltransferase 2                          | Upregulated |
| A_23_P329 | 0.001694 | 0.000224  | 2.48 | DDX10          | DEAD (Asp-Glu-Ala-Asp) box polypeptide 10                             | Upregulated |
| A_23_P155 | 0.003804 | 0.000812  | 2.48 | APOL6          | apolipoprotein L, 6                                                   | Upregulated |
| A_33_P333 | 0.004681 | 0.0011    | 2.48 | PRKDC          | protein kinase, DNA-activated, catalytic polypeptide                  | Upregulated |
| A_21_P001 | 0.004796 | 0.00114   | 2.48 | XLOC_I2_015760 |                                                                       | Upregulated |
| A_24_P299 | 0.00056  | 0.0000162 | 2.47 | PASK           | PAS domain containing serine/threonine kinase                         | Upregulated |
| A_24_P374 | 0.000857 | 0.0000558 | 2.47 | STAG3L2        | stromal antigen 3-like 2 (pseudogene)                                 | Upregulated |
| A_23_P141 | 0.001047 | 0.0000881 | 2.47 | ZNF544         | zinc finger protein 544                                               | Upregulated |
| A_22_P000 | 0.001067 | 0.0000929 | 2.47 | UBXN7-AS1      | UBXN7 antisense RNA 1                                                 | Upregulated |
| A_23_P673 | 0.001069 | 0.0000936 | 2.47 | ZNF136         | zinc finger protein 136                                               | Upregulated |
| A_33_P323 | 0.001158 | 0.000111  | 2.47 | TTF1           | transcription termination factor, RNA polymerase I                    | Upregulated |
| A_23_P170 | 0.003002 | 0.000568  | 2.47 | SBSPON         | somatomedin B and thrombospondin, type 1 domain containing            | Upregulated |



|           |          |           |      |             |                                                                          |             |
|-----------|----------|-----------|------|-------------|--------------------------------------------------------------------------|-------------|
| A_33_P341 | 0.007806 | 0.00229   | 2.47 | SNORA59B    | small nucleolar RNA, H/ACA box 59B                                       | Upregulated |
| A_23_P548 | 0.00056  | 0.0000162 | 2.46 | MT1A        | metallothionein 1A                                                       | Upregulated |
| A_33_P330 | 0.000561 | 0.0000166 | 2.46 | SNAP23      | synaptosomal-associated protein, 23kDa                                   | Upregulated |
| A_23_P238 | 0.000603 | 0.0000224 | 2.46 | SLC30A1     | solute carrier family 30 (zinc transporter), member 1                    | Upregulated |
| A_33_P329 | 0.00062  | 0.0000241 | 2.46 | LRRC37B     | leucine rich repeat containing 37B                                       | Upregulated |
| A_33_P331 | 0.000641 | 0.000026  | 2.46 | CA5BP1      | carbonic anhydrase VB pseudogene 1                                       | Upregulated |
| A_33_P342 | 0.000695 | 0.0000316 | 2.46 | KDM4A       | lysine (K)-specific demethylase 4A                                       | Upregulated |
| A_33_P332 | 0.000868 | 0.0000574 | 2.46 | SDHC        | succinate dehydrogenase complex, subunit C, integral membrane prote      | Upregulated |
| A_23_P101 | 0.00124  | 0.000127  | 2.46 | ZNF667      | zinc finger protein 667                                                  | Upregulated |
| A_21_P001 | 0.001787 | 0.000246  | 2.46 | LOC403323   | uncharacterized LOC403323                                                | Upregulated |
| A_23_P204 | 0.002459 | 0.000417  | 2.46 | RNFT2       | ring finger protein, transmembrane 2                                     | Upregulated |
| A_33_P335 | 0.00338  | 0.000682  | 2.46 | LCE1B       | late comified envelope 1B                                                | Upregulated |
| A_22_P000 | 0.00509  | 0.00124   | 2.46 | lnc-UVRAG-2 | lnc-UVRAG-2:1                                                            | Upregulated |
| A_23_P195 | 0.010345 | 0.00334   | 2.46 | PGM3        | phosphoglucomutase 3                                                     | Upregulated |
| A_33_P321 | 0.011349 | 0.00376   | 2.46 | NOTCH2NL    | notch 2 N-terminal like                                                  | Upregulated |
| A_22_P000 | 0.000577 | 0.0000181 | 2.45 | LOC1019277  | uncharacterized LOC101927761                                             | Upregulated |
| A_23_P488 | 0.00062  | 0.0000239 | 2.45 | GALK2       | galactokinase 2                                                          | Upregulated |
| A_23_P169 | 0.00082  | 0.0000508 | 2.45 | ZNF608      | zinc finger protein 608                                                  | Upregulated |
| A_33_P340 | 0.000904 | 0.0000618 | 2.45 | SEL1L       | sel-1 suppressor of lin-12-like (C. elegans)                             | Upregulated |
| A_21_P001 | 0.001173 | 0.000113  | 2.45 | ANKRD30A    | ankyrin repeat domain 30A                                                | Upregulated |
| A_24_P839 | 0.001996 | 0.000299  | 2.45 | RPP14       | ribonuclease P/MRP 14kDa subunit                                         | Upregulated |
| A_24_P515 | 0.003321 | 0.000666  | 2.45 | CCNL2       | cyclin L2                                                                | Upregulated |
| A_23_P127 | 0.003321 | 0.000666  | 2.45 | ZNF214      | zinc finger protein 214                                                  | Upregulated |
| A_33_P339 | 0.012939 | 0.00446   | 2.45 | CTU1        | cytosolic thiouridylase subunit 1                                        | Upregulated |
| A_21_P000 | 0.00062  | 0.000024  | 2.44 | lnc-SCRG1-1 | lnc-SCRG1-1:4                                                            | Upregulated |
| A_21_P001 | 0.000707 | 0.000034  | 2.44 | LOC1019280  | uncharacterized LOC101928054                                             | Upregulated |
| A_24_P598 | 0.00096  | 0.0000717 | 2.44 | RNF216P1    | ring finger protein 216 pseudogene 1                                     | Upregulated |
| A_33_P336 | 0.000995 | 0.0000785 | 2.44 | APTX        | aprataxin                                                                | Upregulated |
| A_33_P321 | 0.001006 | 0.0000808 | 2.44 | SF3A1       | splicing factor 3a, subunit 1, 120kDa                                    | Upregulated |
| A_23_P368 | 0.001029 | 0.000085  | 2.44 | LILRA6      | leukocyte immunoglobulin-like receptor, subfamily A (with TM domain), nr | Upregulated |
| A_21_P001 | 0.001062 | 0.0000914 | 2.44 | CRCP        | CGRP receptor component                                                  | Upregulated |
| A_24_P481 | 0.004207 | 0.000941  | 2.44 | DPY19L4     | dpy-19-like 4 (C. elegans)                                               | Upregulated |
| A_33_P323 | 0.004743 | 0.00112   | 2.44 | ZNF266      | zinc finger protein 266                                                  | Upregulated |
| A_32_P169 | 0.005408 | 0.00136   | 2.44 | OTUD5       | OTU deubiquitinase 5                                                     | Upregulated |
| A_23_P463 | 0.005592 | 0.00143   | 2.44 | RCC1        | regulator of chromosome condensation 1                                   | Upregulated |
| A_23_P385 | 0.011144 | 0.00367   | 2.44 | KCTD6       | potassium channel tetramerization domain containing 6                    | Upregulated |
| A_33_P335 | 0.000588 | 0.0000204 | 2.43 | C6orf48     | chromosome 6 open reading frame 48                                       | Upregulated |

|           |          |           |      |              |                                                                          |             |
|-----------|----------|-----------|------|--------------|--------------------------------------------------------------------------|-------------|
| A_22_P000 | 0.000707 | 0.0000344 | 2.43 | FAM110A      | family with sequence similarity 110, member A                            | Upregulated |
| A_33_P337 | 0.000801 | 0.0000478 | 2.43 | LINC00862    | long intergenic non-protein coding RNA 862                               | Upregulated |
| A_21_P000 | 0.001051 | 0.0000888 | 2.43 | lnc-FUT8-1   | lnc-FUT8-1:1                                                             | Upregulated |
| A_24_P271 | 0.00112  | 0.000103  | 2.43 | C18orf32     | chromosome 18 open reading frame 32                                      | Upregulated |
| A_24_P730 | 0.001203 | 0.00012   | 2.43 | TTC12        | tetratricopeptide repeat domain 12                                       | Upregulated |
| A_23_P931 | 0.003041 | 0.00058   | 2.43 | SPIN1        | spindlin 1                                                               | Upregulated |
| A_23_P130 | 0.007036 | 0.00199   | 2.43 | OR1A2        | olfactory receptor, family 1, subfamily A, member 2                      | Upregulated |
| A_23_P230 | 0.009133 | 0.00283   | 2.43 | TTC4         | tetratricopeptide repeat domain 4                                        | Upregulated |
| A_23_P207 | 0.009923 | 0.00316   | 2.43 | ARL17B       | ADP-ribosylation factor-like 17B                                         | Upregulated |
| A_23_P313 | 0.010371 | 0.00335   | 2.43 | CEP295       | centrosomal protein 295kDa                                               | Upregulated |
| A_24_P380 | 0.014369 | 0.00511   | 2.43 | EIF5A2       | eukaryotic translation initiation factor 5A2                             | Upregulated |
| A_33_P334 | 0.000577 | 0.0000185 | 2.42 | BRI3         | brain protein I3                                                         | Upregulated |
| A_32_P254 | 0.000978 | 0.0000754 | 2.42 | SLC12A2      | solute carrier family 12 (sodium/potassium/chloride transporter), member | Upregulated |
| A_23_P100 | 0.000995 | 0.0000786 | 2.42 | AVEN         | apoptosis, caspase activation inhibitor                                  | Upregulated |
| A_24_P765 | 0.002039 | 0.000312  | 2.42 | WASF2        | WAS protein family, member 2                                             | Upregulated |
| A_23_P505 | 0.004962 | 0.0012    | 2.42 | KCNK6        | potassium channel, two pore domain subfamily K, member 6                 | Upregulated |
| A_22_P000 | 0.007726 | 0.00226   | 2.42 | LOC1019275   | uncharacterized LOC101927556                                             | Upregulated |
| A_23_P500 | 0.015953 | 0.00586   | 2.42 | ABCA6        | ATP-binding cassette, sub-family A (ABC1), member 6                      | Upregulated |
| A_33_P337 | 0.00056  | 0.0000161 | 2.41 | N4BP2L2-IT2  | N4BPL2 intronic transcript 2 (non-protein coding)                        | Upregulated |
| A_23_P322 | 0.000601 | 0.0000218 | 2.41 | GPR55        | G protein-coupled receptor 55                                            | Upregulated |
| A_33_P380 | 0.00067  | 0.0000288 | 2.41 | FNIP2        | folliculin interacting protein 2                                         | Upregulated |
| A_24_P291 | 0.000852 | 0.0000547 | 2.41 | USP4         | ubiquitin specific peptidase 4 (proto-oncogene)                          | Upregulated |
| A_33_P329 | 0.001443 | 0.000168  | 2.41 | VMAC         | vimentin-type intermediate filament associated coiled-coil protein       | Upregulated |
| A_23_P707 | 0.011014 | 0.00361   | 2.41 | AHI1         | Abelson helper integration site 1                                        | Upregulated |
| A_23_P799 | 0.011361 | 0.00377   | 2.41 | ATRN         | attractin                                                                | Upregulated |
| A_33_P323 | 0.01307  | 0.00452   | 2.41 | AURKAPS1     | aurora kinase A pseudogene 1                                             | Upregulated |
| A_23_P152 | 0.022837 | 0.00916   | 2.41 | POLR3E       | polymerase (RNA) III (DNA directed) polypeptide E (80kD)                 | Upregulated |
| A_24_P462 | 0.000563 | 0.0000167 | 2.4  | CENPW        | centromere protein W                                                     | Upregulated |
| A_21_P000 | 0.000577 | 0.0000185 | 2.4  | lnc-DERA-1   | lnc-DERA-1:1                                                             | Upregulated |
| A_24_P109 | 0.000621 | 0.0000243 | 2.4  | USP37        | ubiquitin specific peptidase 37                                          | Upregulated |
| A_33_P331 | 0.000637 | 0.0000255 | 2.4  | ADRB1        | adrenoceptor beta 1                                                      | Upregulated |
| A_24_P925 | 0.000707 | 0.0000338 | 2.4  | GM2A         | GM2 ganglioside activator                                                | Upregulated |
| A_33_P326 | 0.000998 | 0.0000798 | 2.4  | MRPS25       | mitochondrial ribosomal protein S25                                      | Upregulated |
| A_21_P000 | 0.001066 | 0.0000922 | 2.4  | lnc-FAM70A-1 | lnc-FAM70A-1:5                                                           | Upregulated |
| A_33_P326 | 0.002442 | 0.000413  | 2.4  | WDR19        | WD repeat domain 19                                                      | Upregulated |
| A_22_P000 | 0.005707 | 0.00147   | 2.4  | PDP2         | pyruvate dehydrogenase phosphatase catalytic subunit 2                   | Upregulated |
| A_23_P209 | 0.000596 | 0.0000211 | 2.39 | SMC6         | structural maintenance of chromosomes 6                                  | Upregulated |

|           |          |           |      |             |                                                                             |             |
|-----------|----------|-----------|------|-------------|-----------------------------------------------------------------------------|-------------|
| A_22_P000 | 0.000707 | 0.0000339 | 2.39 | Inc-TMEM242 | Inc-TMEM242-2:1                                                             | Upregulated |
| A_33_P329 | 0.000711 | 0.0000356 | 2.39 | PARP1       | poly (ADP-ribose) polymerase 1                                              | Upregulated |
| A_21_P000 | 0.000836 | 0.0000524 | 2.39 | LOC1046135  | uncharacterized LOC104613533                                                | Upregulated |
| A_33_P337 | 0.000912 | 0.0000634 | 2.39 | CDC37L1     | cell division cycle 37-like 1                                               | Upregulated |
| A_23_P258 | 0.000998 | 0.0000795 | 2.39 | DNAAF5      | dynein, axonemal, assembly factor 5                                         | Upregulated |
| A_23_P152 | 0.00112  | 0.000103  | 2.39 | TRIP4       | thyroid hormone receptor interactor 4                                       | Upregulated |
| A_24_P419 | 0.001442 | 0.000167  | 2.39 | ZNF248      | zinc finger protein 248                                                     | Upregulated |
| A_23_P217 | 0.001617 | 0.000206  | 2.39 | SPHAR       | S-phase response (cyclin related)                                           | Upregulated |
| A_24_P943 | 0.004648 | 0.00109   | 2.39 | PIKFYVE     | phosphoinositide kinase, FYVE finger containing                             | Upregulated |
| A_22_P000 | 0.005462 | 0.00138   | 2.39 | Inc-PLD6-1  | Inc-PLD6-1:1                                                                | Upregulated |
| A_23_P328 | 0.008458 | 0.00255   | 2.39 | ZNF519      | zinc finger protein 519                                                     | Upregulated |
| A_33_P330 | 0.000575 | 0.0000177 | 2.38 | PPM1D       | protein phosphatase, Mg <sup>2+</sup> /Mn <sup>2+</sup> dependent, 1D       | Upregulated |
| A_33_P322 | 0.000578 | 0.0000192 | 2.38 | H2BFM       | H2B histone family, member M                                                | Upregulated |
| A_21_P001 | 0.00067  | 0.0000289 | 2.38 | AK4         | adenylate kinase 4                                                          | Upregulated |
| A_23_P213 | 0.000743 | 0.0000399 | 2.38 | F2R         | coagulation factor II (thrombin) receptor                                   | Upregulated |
| A_33_P328 | 0.000933 | 0.0000666 | 2.38 | GNN         | Grp94 neighboring nucleotidase pseudogene                                   | Upregulated |
| A_33_P327 | 0.001115 | 0.000102  | 2.38 | LEO1        | Leo1, Paf1/RNA polymerase II complex component, homolog (S. cerevisiae)     | Upregulated |
| A_23_P688 | 0.001193 | 0.000117  | 2.38 | DRG1        | developmentally regulated GTP binding protein 1                             | Upregulated |
| A_23_P385 | 0.002592 | 0.000455  | 2.38 | ZFP1        | ZFP1 zinc finger protein                                                    | Upregulated |
| A_23_P301 | 0.002965 | 0.000557  | 2.38 | LSAMP       | limbic system-associated membrane protein                                   | Upregulated |
| A_33_P332 | 0.003601 | 0.00075   | 2.38 | AZI2        | 5-azacytidine induced 2                                                     | Upregulated |
| A_33_P333 | 0.000603 | 0.000022  | 2.37 | LOC1001304  | uncharacterized LOC100130463                                                | Upregulated |
| A_23_P900 | 0.000684 | 0.00003   | 2.37 | TMEM205     | transmembrane protein 205                                                   | Upregulated |
| A_23_P121 | 0.000701 | 0.0000326 | 2.37 | CXCL13      | chemokine (C-X-C motif) ligand 13                                           | Upregulated |
| A_22_P000 | 0.000712 | 0.000036  | 2.37 | LOC1005056  | uncharacterized LOC100505622                                                | Upregulated |
| A_24_P915 | 0.000766 | 0.0000428 | 2.37 | C9orf91     | chromosome 9 open reading frame 91                                          | Upregulated |
| A_23_P287 | 0.000819 | 0.0000506 | 2.37 | KLC1        | kinesin light chain 1                                                       | Upregulated |
| A_23_P338 | 0.001029 | 0.000085  | 2.37 | BCDIN3D     | BCDIN3 domain containing                                                    | Upregulated |
| A_33_P341 | 0.001187 | 0.000116  | 2.37 | GNAI3       | guanine nucleotide binding protein (G protein), alpha inhibiting activity p | Upregulated |
| A_23_P178 | 0.001523 | 0.000185  | 2.37 | SEC14L2     | SEC14-like 2 (S. cerevisiae)                                                | Upregulated |
| A_33_P325 | 0.001626 | 0.000208  | 2.37 | TMEM255B    | transmembrane protein 255B                                                  | Upregulated |
| A_23_P307 | 0.001626 | 0.000208  | 2.37 | WHSC1       | Wolf-Hirschhorn syndrome candidate 1                                        | Upregulated |
| A_23_P251 | 0.009612 | 0.00303   | 2.37 | CDCA7       | cell division cycle associated 7                                            | Upregulated |
| A_22_P000 | 0.009874 | 0.00314   | 2.37 | CLIP1-AS1   | CLIP1 antisense RNA 1                                                       | Upregulated |
| A_21_P000 | 0.000578 | 0.0000187 | 2.36 | SNORD53     | small nucleolar RNA, C/D box 53                                             | Upregulated |
| A_23_P393 | 0.000645 | 0.0000264 | 2.36 | TFPI2       | tissue factor pathway inhibitor 2                                           | Upregulated |
| A_23_P167 | 0.000712 | 0.0000358 | 2.36 | MAPK9       | mitogen-activated protein kinase 9                                          | Upregulated |

|           |          |           |      |                |                                                         |             |
|-----------|----------|-----------|------|----------------|---------------------------------------------------------|-------------|
| A_33_P331 | 0.000776 | 0.0000439 | 2.36 | CHD1L          | chromodomain helicase DNA binding protein 1-like        | Upregulated |
| A_22_P000 | 0.010809 | 0.00353   | 2.36 | MIRLET7DHC     | MIRLET7D host gene (non-protein coding)                 | Upregulated |
| A_21_P001 | 0.016444 | 0.00611   | 2.36 | XLOC_I2_009332 |                                                         | Upregulated |
| A_21_P001 | 0.000579 | 0.0000195 | 2.35 | ANKRD20A2      | ankyrin repeat domain 20 family, member A2              | Upregulated |
| A_23_P303 | 0.00063  | 0.0000251 | 2.35 | CCNH           | cyclin H                                                | Upregulated |
| A_23_P162 | 0.000707 | 0.0000344 | 2.35 | VDR            | vitamin D (1,25- dihydroxyvitamin D3) receptor          | Upregulated |
| A_33_P338 | 0.000709 | 0.000035  | 2.35 | FMNL1          | formin-like 1                                           | Upregulated |
| A_33_P326 | 0.001022 | 0.0000838 | 2.35 | SP140          | SP140 nuclear body protein                              | Upregulated |
| A_24_P360 | 0.001178 | 0.000114  | 2.35 | DIP2C          | DIP2 disco-interacting protein 2 homolog C (Drosophila) | Upregulated |
| A_24_P791 | 0.001863 | 0.000265  | 2.35 | SCAMP4         | secretory carrier membrane protein 4                    | Upregulated |
| A_33_P333 | 0.00317  | 0.00062   | 2.35 | ARHGAP11A      | Rho GTPase activating protein 11A                       | Upregulated |
| A_22_P000 | 0.005802 | 0.00151   | 2.35 | LINC01063      | long intergenic non-protein coding RNA 1063             | Upregulated |
| A_23_P154 | 0.010321 | 0.00333   | 2.35 | HIRA           | histone cell cycle regulator                            | Upregulated |
| A_24_P210 | 0.013566 | 0.00474   | 2.35 | SCG3           | secretogranin III                                       | Upregulated |
| A_24_P194 | 0.018624 | 0.00711   | 2.35 | SHANK3         | SH3 and multiple ankyrin repeat domains 3               | Upregulated |
| A_33_P378 | 0.000603 | 0.0000224 | 2.34 | NAV2-AS4       | NAV2 antisense RNA 4                                    | Upregulated |
| A_33_P328 | 0.000654 | 0.0000273 | 2.34 | LOC91450       | uncharacterized LOC91450                                | Upregulated |
| A_22_P000 | 0.000707 | 0.000034  | 2.34 | lnc-C11orf41-  | lnc-C11orf41-1:1                                        | Upregulated |
| A_23_P109 | 0.000755 | 0.0000411 | 2.34 | PTTG1IP        | pituitary tumor-transforming 1 interacting protein      | Upregulated |
| A_23_P343 | 0.000786 | 0.0000453 | 2.34 | CCR7           | chemokine (C-C motif) receptor 7                        | Upregulated |
| A_23_P685 | 0.000995 | 0.0000785 | 2.34 | MCM8           | minichromosome maintenance complex component 8          | Upregulated |
| A_24_P187 | 0.000995 | 0.0000785 | 2.34 | MRPS27         | mitochondrial ribosomal protein S27                     | Upregulated |
| A_21_P000 | 0.000995 | 0.0000785 | 2.34 | RAB11B-AS1     | RAB11B antisense RNA 1                                  | Upregulated |
| A_33_P336 | 0.001698 | 0.000225  | 2.34 | LOC1005071     | uncharacterized LOC100507195                            | Upregulated |
| A_23_P103 | 0.003056 | 0.000584  | 2.34 | MAN1C1         | mannosidase, alpha, class 1C, member 1                  | Upregulated |
| A_22_P000 | 0.008535 | 0.00258   | 2.34 | lnc-ALX4-7     | lnc-ALX4-7:1                                            | Upregulated |
| A_22_P000 | 0.010057 | 0.00322   | 2.34 | lnc-PXDNL-1    | lnc-PXDNL-1:1                                           | Upregulated |
| A_23_P209 | 0.014668 | 0.00527   | 2.34 | ZNF302         | zinc finger protein 302                                 | Upregulated |
| A_33_P321 | 0.00058  | 0.0000195 | 2.33 | TMEM167B       | transmembrane protein 167B                              | Upregulated |
| A_21_P000 | 0.000583 | 0.0000198 | 2.33 | lnc-FRG1-2     | lnc-FRG1-2:1                                            | Upregulated |
| A_23_P331 | 0.000602 | 0.0000218 | 2.33 | IPO7           | importin 7                                              | Upregulated |
| A_33_P332 | 0.000707 | 0.0000338 | 2.33 | TOMM34         | translocase of outer mitochondrial membrane 34          | Upregulated |
| A_23_P583 | 0.000707 | 0.0000342 | 2.33 | FIP1L1         | factor interacting with PAPOLA and CPSF1                | Upregulated |
| A_32_P215 | 0.000798 | 0.0000472 | 2.33 | CCDC58         | coiled-coil domain containing 58                        | Upregulated |
| A_22_P000 | 0.000848 | 0.0000541 | 2.33 | lnc-TPX2-1     | lnc-TPX2-1:1                                            | Upregulated |
| A_21_P000 | 0.001123 | 0.000104  | 2.33 | SNORA27        | small nucleolar RNA, H/ACA box 27                       | Upregulated |
| A_33_P340 | 0.001123 | 0.000104  | 2.33 | TMEM192        | transmembrane protein 192                               | Upregulated |

|           |          |           |      |                |                                                                                   |             |
|-----------|----------|-----------|------|----------------|-----------------------------------------------------------------------------------|-------------|
| A_23_P107 | 0.001355 | 0.000149  | 2.33 | ZNF324         | zinc finger protein 324                                                           | Upregulated |
| A_33_P333 | 0.00176  | 0.000239  | 2.33 | FANK1          | fibronectin type III and ankyrin repeat domains 1                                 | Upregulated |
| A_23_P997 | 0.002124 | 0.000335  | 2.33 | CDKL1          | cyclin-dependent kinase-like 1 (CDC2-related kinase)                              | Upregulated |
| A_23_P398 | 0.002523 | 0.000436  | 2.33 | GOLGA2P7       | golgin A2 pseudogene 7                                                            | Upregulated |
| A_21_P000 | 0.004983 | 0.00121   | 2.33 | SNORD67        | small nucleolar RNA, C/D box 67                                                   | Upregulated |
| A_32_P215 | 0.007704 | 0.00225   | 2.33 | ACACA          | acetyl-CoA carboxylase alpha                                                      | Upregulated |
| A_23_P373 | 0.00861  | 0.00262   | 2.33 | CWC22          | CWC22 spliceosome-associated protein                                              | Upregulated |
| A_24_P177 | 0.009659 | 0.00305   | 2.33 | LONP2          | lon peptidase 2, peroxisomal                                                      | Upregulated |
| A_22_P000 | 0.010107 | 0.00324   | 2.33 | lnc-EXTL3-5    | lnc-EXTL3-5:1                                                                     | Upregulated |
| A_23_P341 | 0.000625 | 0.0000246 | 2.32 | FAM50A         | family with sequence similarity 50, member A                                      | Upregulated |
| A_22_P000 | 0.000884 | 0.0000593 | 2.32 | lnc-RPS27A-1   | lnc-RPS27A-1:1                                                                    | Upregulated |
| A_33_P324 | 0.00109  | 0.000097  | 2.32 | BAAT           | bile acid CoA:amino acid N-acyltransferase                                        | Upregulated |
| A_23_P158 | 0.001108 | 0.000101  | 2.32 | ACADSB         | acyl-CoA dehydrogenase, short/branched chain                                      | Upregulated |
| A_21_P000 | 0.001118 | 0.000103  | 2.32 | CAMTA1         | calmodulin binding transcription activator 1                                      | Upregulated |
| A_33_P341 | 0.001295 | 0.000137  | 2.32 | FSCN1          | fascin actin-bundling protein 1                                                   | Upregulated |
| A_22_P000 | 0.002361 | 0.000393  | 2.32 | lnc-OBFC2A-1   | lnc-OBFC2A-1:1                                                                    | Upregulated |
| A_23_P379 | 0.002968 | 0.000558  | 2.32 | GNRHR2         | gonadotropin-releasing hormone (type 2) receptor 2, pseudogene                    | Upregulated |
| A_24_P141 | 0.003244 | 0.000643  | 2.32 | CAMK2G         | calcium/calmodulin-dependent protein kinase II gamma                              | Upregulated |
| A_33_P330 | 0.00386  | 0.000831  | 2.32 | HDAC2          | histone deacetylase 2                                                             | Upregulated |
| A_33_P325 | 0.005197 | 0.00128   | 2.32 | SLC9A7         | solute carrier family 9, subfamily A (NHE7, cation proton antiporter 7), member 7 | Upregulated |
| A_33_P326 | 0.008018 | 0.00237   | 2.32 | NALCN          | sodium leak channel, non selective                                                | Upregulated |
| A_23_P317 | 0.000596 | 0.000021  | 2.31 | PKIA           | protein kinase (cAMP-dependent, catalytic) inhibitor alpha                        | Upregulated |
| A_33_P330 | 0.000658 | 0.0000275 | 2.31 | SEN1           | SUMO1/sentrin specific peptidase 1                                                | Upregulated |
| A_23_P497 | 0.000709 | 0.0000348 | 2.31 | MRPL27         | mitochondrial ribosomal protein L27                                               | Upregulated |
| A_24_P484 | 0.000913 | 0.0000637 | 2.31 | RNMT           | RNA (guanine-7-) methyltransferase                                                | Upregulated |
| A_23_P390 | 0.001858 | 0.000264  | 2.31 | SPATA13        | spermatogenesis associated 13                                                     | Upregulated |
| A_21_P001 | 0.004281 | 0.000967  | 2.31 | LOC1019288     | uncharacterized LOC101928865                                                      | Upregulated |
| A_23_P649 | 0.009898 | 0.00315   | 2.31 | USP5           | ubiquitin specific peptidase 5 (isopeptidase T)                                   | Upregulated |
| A_32_P216 | 0.00062  | 0.0000239 | 2.3  | PDXDC2P        | pyridoxal-dependent decarboxylase domain containing 2, pseudogene                 | Upregulated |
| A_23_P360 | 0.000691 | 0.0000306 | 2.3  | SSRP1          | structure specific recognition protein 1                                          | Upregulated |
| A_21_P001 | 0.000722 | 0.0000374 | 2.3  | XLOC_I2_002729 |                                                                                   | Upregulated |
| A_23_P996 | 0.001062 | 0.0000912 | 2.3  | G2E3           | G2/M-phase specific E3 ubiquitin protein ligase                                   | Upregulated |
| A_33_P328 | 0.001069 | 0.0000934 | 2.3  | EFR3B          | EFR3 homolog B (S. cerevisiae)                                                    | Upregulated |
| A_24_P311 | 0.002168 | 0.000346  | 2.3  | PACRGL         | PARK2 co-regulated-like                                                           | Upregulated |
| A_24_P169 | 0.003315 | 0.000664  | 2.3  | ZNF160         | zinc finger protein 160                                                           | Upregulated |
| A_21_P001 | 0.005821 | 0.00152   | 2.3  | NUTM2B-AS1     | NUTM2B antisense RNA 1                                                            | Upregulated |
| A_33_P323 | 0.006202 | 0.00166   | 2.3  | LOC1001302     | LP2209                                                                            | Upregulated |

|           |          |           |      |               |                                                                              |             |
|-----------|----------|-----------|------|---------------|------------------------------------------------------------------------------|-------------|
| A_23_P388 | 0.012585 | 0.0043    | 2.3  | SLC22A15      | solute carrier family 22, member 15                                          | Upregulated |
| A_23_P880 | 0.000658 | 0.0000276 | 2.29 | CARKD         | carbohydrate kinase domain containing                                        | Upregulated |
| A_32_P171 | 0.000693 | 0.0000309 | 2.29 | UBE2S         | ubiquitin-conjugating enzyme E2S                                             | Upregulated |
| A_23_P207 | 0.000852 | 0.0000547 | 2.29 | STAT5A        | signal transducer and activator of transcription 5A                          | Upregulated |
| A_23_P306 | 0.001678 | 0.000219  | 2.29 | MCM9          | minichromosome maintenance complex component 9                               | Upregulated |
| A_22_P000 | 0.001815 | 0.000253  | 2.29 | ORC3          | origin recognition complex, subunit 3                                        | Upregulated |
| A_21_P000 | 0.002043 | 0.000313  | 2.29 | lnc-C5orf17-6 | lnc-C5orf17-6:1                                                              | Upregulated |
| A_24_P364 | 0.002091 | 0.000324  | 2.29 | STX2          | syntaxin 2                                                                   | Upregulated |
| A_22_P000 | 0.002337 | 0.000387  | 2.29 | GPR107        | G protein-coupled receptor 107                                               | Upregulated |
| A_33_P325 | 0.003258 | 0.000646  | 2.29 | C14orf80      | chromosome 14 open reading frame 80                                          | Upregulated |
| A_19_P008 | 0.003335 | 0.00067   | 2.29 | PSMD14        | proteasome (prosome, macropain) 26S subunit, non-ATPase, 14                  | Upregulated |
| A_33_P321 | 0.008968 | 0.00276   | 2.29 | lnc-CHADL-3   | lnc-CHADL-3:1                                                                | Upregulated |
| A_24_P940 | 0.010809 | 0.00353   | 2.29 | C17orf104     | chromosome 17 open reading frame 104                                         | Upregulated |
| A_24_P720 | 0.016422 | 0.0061    | 2.29 | KIDINS220     | kinase D-interacting substrate, 220kDa                                       | Upregulated |
| A_32_P714 | 0.017675 | 0.00667   | 2.29 | NCAPD3        | non-SMC condensin II complex, subunit D3                                     | Upregulated |
| A_33_P340 | 0.000585 | 0.0000201 | 2.28 | DCTN1         | dynactin 1                                                                   | Upregulated |
| A_23_P145 | 0.000608 | 0.000023  | 2.28 | MALSU1        | mitochondrial assembly of ribosomal large subunit 1                          | Upregulated |
| A_33_P321 | 0.000663 | 0.0000281 | 2.28 | PCF11         | PCF11 cleavage and polyadenylation factor subunit                            | Upregulated |
| A_23_P145 | 0.000794 | 0.0000467 | 2.28 | CCNC          | cyclin C                                                                     | Upregulated |
| A_23_P434 | 0.000961 | 0.000072  | 2.28 | HN1L          | hematological and neurological expressed 1-like                              | Upregulated |
| A_33_P333 | 0.00104  | 0.0000865 | 2.28 | WBP11         | WW domain binding protein 11                                                 | Upregulated |
| A_22_P000 | 0.001134 | 0.000106  | 2.28 | lnc-LRRC36-1  | lnc-LRRC36-1:1                                                               | Upregulated |
| A_23_P216 | 0.001603 | 0.000202  | 2.28 | SLC1A1        | solute carrier family 1 (neuronal/epithelial high affinity glutamate transpo | Upregulated |
| A_21_P000 | 0.001954 | 0.000288  | 2.28 | PET117        | PET117 homolog (S. cerevisiae)                                               | Upregulated |
| A_19_P008 | 0.002544 | 0.000441  | 2.28 | LOC400958     | uncharacterized LOC400958                                                    | Upregulated |
| A_32_P122 | 0.003012 | 0.000572  | 2.28 | MSANTD3       | Myb/SANT-like DNA-binding domain containing 3                                | Upregulated |
| A_23_P459 | 0.004328 | 0.000984  | 2.28 | FBXO2         | F-box protein 2                                                              | Upregulated |
| A_23_P267 | 0.008041 | 0.00238   | 2.28 | CD300C        | CD300c molecule                                                              | Upregulated |
| A_22_P000 | 0.008644 | 0.00263   | 2.28 | lnc-ZDHHC9-1  | lnc-ZDHHC9-1:1                                                               | Upregulated |
| A_24_P935 | 0.000697 | 0.0000321 | 2.27 | BCAT1         | branched chain amino-acid transaminase 1, cytosolic                          | Upregulated |
| A_33_P328 | 0.000814 | 0.0000501 | 2.27 | MGC72080      | MGC72080 pseudogene                                                          | Upregulated |
| A_24_P294 | 0.000926 | 0.0000654 | 2.27 | PLA1A         | phospholipase A1 member A                                                    | Upregulated |
| A_33_P341 | 0.000964 | 0.0000729 | 2.27 | LOC339192     | uncharacterized LOC339192                                                    | Upregulated |
| A_23_P118 | 0.000974 | 0.0000748 | 2.27 | HSD17B7       | hydroxysteroid (17-beta) dehydrogenase 7                                     | Upregulated |
| A_23_P484 | 0.001029 | 0.0000848 | 2.27 | RAD51B        | RAD51 paralog B                                                              | Upregulated |
| A_22_P000 | 0.0014   | 0.000159  | 2.27 | FXR1          | fragile X mental retardation, autosomal homolog 1                            | Upregulated |
| A_24_P932 | 0.003208 | 0.000632  | 2.27 | HMBOX1        | homeobox containing 1                                                        | Upregulated |

|           |          |           |      |              |                                                           |             |
|-----------|----------|-----------|------|--------------|-----------------------------------------------------------|-------------|
| A_33_P322 | 0.003291 | 0.000656  | 2.27 | DLG1         | discs, large homolog 1 (Drosophila)                       | Upregulated |
| A_33_P340 | 0.000601 | 0.0000217 | 2.26 | TMPPE        | transmembrane protein with metallophosphoesterase domain  | Upregulated |
| A_33_P330 | 0.000701 | 0.0000327 | 2.26 | DCAF12L2     | DDB1 and CUL4 associated factor 12-like 2                 | Upregulated |
| A_23_P153 | 0.00072  | 0.0000371 | 2.26 | ICAM1        | intercellular adhesion molecule 1                         | Upregulated |
| A_23_P132 | 0.000899 | 0.000061  | 2.26 | SIDT1        | SID1 transmembrane family, member 1                       | Upregulated |
| A_33_P322 | 0.000995 | 0.0000787 | 2.26 | EIF2AK2      | eukaryotic translation initiation factor 2-alpha kinase 2 | Upregulated |
| A_33_P336 | 0.001062 | 0.0000911 | 2.26 | NOL4L        | nucleolar protein 4-like                                  | Upregulated |
| A_24_P380 | 0.001478 | 0.000176  | 2.26 | FKBP5        | FK506 binding protein 5                                   | Upregulated |
| A_33_P339 | 0.001622 | 0.000207  | 2.26 | KLHL12       | kelch-like family member 12                               | Upregulated |
| A_33_P323 | 0.002555 | 0.000444  | 2.26 | NFYA         | nuclear transcription factor Y, alpha                     | Upregulated |
| A_23_P967 | 0.003096 | 0.000597  | 2.26 | LRRC47       | leucine rich repeat containing 47                         | Upregulated |
| A_21_P001 | 0.00388  | 0.000837  | 2.26 | lnc-ZNF280D- | lnc-ZNF280D-1:1                                           | Upregulated |
| A_23_P219 | 0.005332 | 0.00134   | 2.26 | RGS3         | regulator of G-protein signaling 3                        | Upregulated |
| A_33_P370 | 0.005372 | 0.00135   | 2.26 | SNX24        | sorting nexin 24                                          | Upregulated |
| A_33_P327 | 0.012267 | 0.00417   | 2.26 | HEATR5A      | HEAT repeat containing 5A                                 | Upregulated |
| A_32_P813 | 0.000597 | 0.0000213 | 2.25 | FAHD2A       | fumarylacetoacetate hydrolase domain containing 2A        | Upregulated |
| A_33_P320 | 0.000603 | 0.0000222 | 2.25 | IARS         | isoleucyl-tRNA synthetase                                 | Upregulated |
| A_33_P346 | 0.000801 | 0.0000476 | 2.25 | DNAJC3       | DnaJ (Hsp40) homolog, subfamily C, member 3               | Upregulated |
| A_33_P325 | 0.000805 | 0.0000484 | 2.25 | ZYG11A       | zyg-11 family member A, cell cycle regulator              | Upregulated |
| A_22_P000 | 0.000824 | 0.0000513 | 2.25 | lnc-TFB2M-1  | lnc-TFB2M-1:1                                             | Upregulated |
| A_23_P345 | 0.000908 | 0.0000628 | 2.25 | SDCCAG8      | serologically defined colon cancer antigen 8              | Upregulated |
| A_21_P000 | 0.000908 | 0.0000628 | 2.25 | SNORA61      | small nucleolar RNA, H/ACA box 61                         | Upregulated |
| A_24_P839 | 0.001007 | 0.0000812 | 2.25 | SNRPC        | small nuclear ribonucleoprotein polypeptide C             | Upregulated |
| A_24_P404 | 0.018699 | 0.00715   | 2.25 | PCYT2        | phosphate cytidyltransferase 2, ethanolamine              | Upregulated |
| A_24_P287 | 0.000675 | 0.0000294 | 2.24 | CHMP1A       | charged multivesicular body protein 1A                    | Upregulated |
| A_33_P323 | 0.000994 | 0.0000776 | 2.24 | INPP5F       | inositol polyphosphate-5-phosphatase F                    | Upregulated |
| A_23_P210 | 0.001468 | 0.000173  | 2.24 | ARFGAP1      | ADP-ribosylation factor GTPase activating protein 1       | Upregulated |
| A_32_P197 | 0.002634 | 0.000465  | 2.24 | FAM76B       | family with sequence similarity 76, member B              | Upregulated |
| A_33_P326 | 0.002846 | 0.000523  | 2.24 | RFT1         | RFT1 homolog (S. cerevisiae)                              | Upregulated |
| A_33_P339 | 0.005746 | 0.00149   | 2.24 | AP1S2        | adaptor-related protein complex 1, sigma 2 subunit        | Upregulated |
| A_33_P327 | 0.006452 | 0.00176   | 2.24 | NOL4L        | nucleolar protein 4-like                                  | Upregulated |
| A_21_P000 | 0.006452 | 0.00176   | 2.24 | SNORD127     | small nucleolar RNA, C/D box 127                          | Upregulated |
| A_23_P500 | 0.009182 | 0.00285   | 2.24 | TUB          | tubby bipartite transcription factor                      | Upregulated |
| A_23_P168 | 0.000697 | 0.0000321 | 2.23 | RBM28        | RNA binding motif protein 28                              | Upregulated |
| A_24_P317 | 0.000755 | 0.0000411 | 2.23 | SORBS1       | sorbin and SH3 domain containing 1                        | Upregulated |
| A_33_P335 | 0.000805 | 0.0000484 | 2.23 | RBAK         | RB-associated KRAB zinc finger                            | Upregulated |
| A_33_P324 | 0.000813 | 0.0000495 | 2.23 | OR4C6        | olfactory receptor, family 4, subfamily C, member 6       | Upregulated |

|           |          |           |      |              |                                                                      |             |
|-----------|----------|-----------|------|--------------|----------------------------------------------------------------------|-------------|
| A_23_P314 | 0.001007 | 0.0000812 | 2.23 | ZNF280C      | zinc finger protein 280C                                             | Upregulated |
| A_24_P409 | 0.001552 | 0.000192  | 2.23 | MIR3654      | microRNA 3654                                                        | Upregulated |
| A_33_P329 | 0.001835 | 0.000258  | 2.23 | HMBOX1       | homeobox containing 1                                                | Upregulated |
| A_23_P900 | 0.001856 | 0.000263  | 2.23 | DNAJB1       | DnaJ (Hsp40) homolog, subfamily B, member 1                          | Upregulated |
| A_24_P121 | 0.002681 | 0.000477  | 2.23 | TMEM86B      | transmembrane protein 86B                                            | Upregulated |
| A_33_P328 | 0.003232 | 0.000639  | 2.23 | SDF4         | stromal cell derived factor 4                                        | Upregulated |
| A_33_P327 | 0.003723 | 0.000787  | 2.23 | UPF2         | UPF2 regulator of nonsense transcripts homolog (yeast)               | Upregulated |
| A_33_P337 | 0.005095 | 0.00125   | 2.23 | FMO5         | flavin containing monooxygenase 5                                    | Upregulated |
| A_23_P749 | 0.005232 | 0.0013    | 2.23 | URB2         | URB2 ribosome biogenesis 2 homolog (S. cerevisiae)                   | Upregulated |
| A_24_P226 | 0.010168 | 0.00327   | 2.23 | MGLL         | monoglyceride lipase                                                 | Upregulated |
| A_33_P368 | 0.011343 | 0.00376   | 2.23 | MAGED2       | melanoma antigen family D, 2                                         | Upregulated |
| A_22_P000 | 0.013889 | 0.00488   | 2.23 | LOC1019271   | uncharacterized LOC101927156                                         | Upregulated |
| A_19_P003 | 0.021337 | 0.00841   | 2.23 | LINC01021    | long intergenic non-protein coding RNA 1021                          | Upregulated |
| A_22_P000 | 0.000605 | 0.0000228 | 2.22 | lnc-ABCC3-1  | lnc-ABCC3-1:1                                                        | Upregulated |
| A_33_P339 | 0.000642 | 0.0000262 | 2.22 | PCMT1        | protein-L-isoaspartate (D-aspartate) O-methyltransferase             | Upregulated |
| A_23_P321 | 0.000697 | 0.000032  | 2.22 | INADL        | InaD-like (Drosophila)                                               | Upregulated |
| A_24_P157 | 0.000801 | 0.0000478 | 2.22 | TNFAIP3      | tumor necrosis factor, alpha-induced protein 3                       | Upregulated |
| A_23_P309 | 0.00129  | 0.000137  | 2.22 | ZSCAN25      | zinc finger and SCAN domain containing 25                            | Upregulated |
| A_24_P281 | 0.001443 | 0.000168  | 2.22 | GNPTAB       | N-acetylglucosamine-1-phosphate transferase, alpha and beta subunits | Upregulated |
| A_24_P414 | 0.002889 | 0.000536  | 2.22 | ALG3         | ALG3, alpha-1,3- mannosyltransferase                                 | Upregulated |
| A_24_P399 | 0.033718 | 0.0149    | 2.22 | CENPM        | centromere protein M                                                 | Upregulated |
| A_19_P008 | 0.000603 | 0.0000224 | 2.21 | CDCA7L       | cell division cycle associated 7-like                                | Upregulated |
| A_23_P109 | 0.00071  | 0.0000353 | 2.21 | PRNP         | prion protein                                                        | Upregulated |
| A_32_P163 | 0.001203 | 0.00012   | 2.21 | SCD          | stearoyl-CoA desaturase (delta-9-desaturase)                         | Upregulated |
| A_22_P000 | 0.001415 | 0.000162  | 2.21 | LINC00641    | long intergenic non-protein coding RNA 641                           | Upregulated |
| A_24_P104 | 0.003032 | 0.000578  | 2.21 | RHOF         | ras homolog family member F (in filopodia)                           | Upregulated |
| A_23_P115 | 0.012283 | 0.00418   | 2.21 | PHYH         | phytanoyl-CoA 2-hydroxylase                                          | Upregulated |
| A_22_P000 | 0.000634 | 0.0000253 | 2.2  | lnc-ANP32E-1 | lnc-ANP32E-1:1                                                       | Upregulated |
| A_33_P346 | 0.000707 | 0.0000344 | 2.2  | BFSP2-AS1    | BFSP2 antisense RNA 1                                                | Upregulated |
| A_23_P642 | 0.000741 | 0.0000395 | 2.2  | ZPR1         | ZPR1 zinc finger                                                     | Upregulated |
| A_23_P106 | 0.00083  | 0.0000519 | 2.2  | MRPS23       | mitochondrial ribosomal protein S23                                  | Upregulated |
| A_33_P329 | 0.001055 | 0.0000899 | 2.2  | MCTS2P       | malignant T cell amplified sequence 2, pseudogene                    | Upregulated |
| A_23_P116 | 0.001097 | 0.0000982 | 2.2  | MSANTD4      | Myb/SANT-like DNA-binding domain containing 4 with coiled-coils      | Upregulated |
| A_21_P001 | 0.001571 | 0.000196  | 2.2  | ZNF605       | zinc finger protein 605                                              | Upregulated |
| A_22_P000 | 0.001887 | 0.00027   | 2.2  | POFUT1       | protein O-fucosyltransferase 1                                       | Upregulated |
| A_33_P330 | 0.002853 | 0.000526  | 2.2  | ZNFX1        | zinc finger, NFX1-type containing 1                                  | Upregulated |
| A_22_P000 | 0.003153 | 0.000613  | 2.2  | SNHG15       | small nucleolar RNA host gene 15 (non-protein coding)                | Upregulated |



|           |          |           |                  |                                                             |             |
|-----------|----------|-----------|------------------|-------------------------------------------------------------|-------------|
| A_33_P334 | 0.012122 | 0.00411   | 2.2 PBX3         | pre-B-cell leukemia homeobox 3                              | Upregulated |
| A_33_P330 | 0.016795 | 0.00627   | 2.2 ANKFY1       | ankyrin repeat and FYVE domain containing 1                 | Upregulated |
| A_33_P328 | 0.000612 | 0.0000234 | 2.19 C14orf2     | chromosome 14 open reading frame 2                          | Upregulated |
| A_23_P738 | 0.000618 | 0.0000237 | 2.19 TCEAL1      | transcription elongation factor A (SII)-like 1              | Upregulated |
| A_23_P250 | 0.000802 | 0.000048  | 2.19 CDKN2AIPNL  | CDKN2A interacting protein N-terminal like                  | Upregulated |
| A_33_P333 | 0.001797 | 0.000248  | 2.19 ARHGAP11B   | Rho GTPase activating protein 11B                           | Upregulated |
| A_33_P321 | 0.002016 | 0.000305  | 2.19 ZBTB8OS     | zinc finger and BTB domain containing 8 opposite strand     | Upregulated |
| A_23_P135 | 0.013768 | 0.00483   | 2.19 SLCO5A1     | solute carrier organic anion transporter family, member 5A1 | Upregulated |
| A_24_P822 | 0.018003 | 0.00683   | 2.19 TMEM198     | transmembrane protein 198                                   | Upregulated |
| A_33_P353 | 0.00072  | 0.0000371 | 2.18 UBE2E4P     | ubiquitin-conjugating enzyme E2E 4 pseudogene               | Upregulated |
| A_24_P179 | 0.000883 | 0.000059  | 2.18 TPR         | translocated promoter region, nuclear basket protein        | Upregulated |
| A_22_P000 | 0.00094  | 0.0000681 | 2.18 lnc-C1QTNF8 | lnc-C1QTNF8-4:1                                             | Upregulated |
| A_23_P997 | 0.001216 | 0.000122  | 2.18 PNMA1       | paraneoplastic Ma antigen 1                                 | Upregulated |
| A_23_P340 | 0.001481 | 0.000177  | 2.18 RAB2A       | RAB2A, member RAS oncogene family                           | Upregulated |
| A_21_P000 | 0.001953 | 0.000287  | 2.18 lnc-FAM182B | lnc-FAM182B-2:1                                             | Upregulated |
| A_23_P379 | 0.003094 | 0.000596  | 2.18 FMNL3       | formin-like 3                                               | Upregulated |
| A_33_P324 | 0.003109 | 0.000601  | 2.18 N4BP2L1     | NEDD4 binding protein 2-like 1                              | Upregulated |
| A_24_P269 | 0.005942 | 0.00156   | 2.18 SPRY4       | sprouty homolog 4 (Drosophila)                              | Upregulated |
| A_23_P622 | 0.006094 | 0.00162   | 2.18 SCAF4       | SR-related CTD-associated factor 4                          | Upregulated |
| A_33_P340 | 0.00811  | 0.00241   | 2.18 TCTEX1D4    | Tctex1 domain containing 4                                  | Upregulated |
| A_32_P206 | 0.000662 | 0.0000278 | 2.17 CKS1B       | CDC28 protein kinase regulatory subunit 1B                  | Upregulated |
| A_24_P401 | 0.000678 | 0.0000296 | 2.17 ARHGAP17    | Rho GTPase activating protein 17                            | Upregulated |
| A_33_P329 | 0.000695 | 0.0000314 | 2.17 CDCA7       | cell division cycle associated 7                            | Upregulated |
| A_23_P391 | 0.000806 | 0.0000486 | 2.17 LIG1        | ligase I, DNA, ATP-dependent                                | Upregulated |
| A_32_P526 | 0.000905 | 0.0000622 | 2.17 LPIN1       | lipin 1                                                     | Upregulated |
| A_24_P958 | 0.00091  | 0.0000631 | 2.17 NPTN        | neuroplastin                                                | Upregulated |
| A_32_P869 | 0.000912 | 0.0000635 | 2.17 KGFLP2      | keratinocyte growth factor-like protein 2                   | Upregulated |
| A_21_P001 | 0.000971 | 0.0000742 | 2.17 IGSF3       | immunoglobulin superfamily, member 3                        | Upregulated |
| A_33_P325 | 0.001443 | 0.000168  | 2.17 DOK3        | docking protein 3                                           | Upregulated |
| A_22_P000 | 0.001476 | 0.000175  | 2.17 LOC1019277  | uncharacterized LOC101927787                                | Upregulated |
| A_23_P345 | 0.002114 | 0.000331  | 2.17 SDCCAG8     | serologically defined colon cancer antigen 8                | Upregulated |
| A_33_P339 | 0.002342 | 0.000389  | 2.17 NREP        | neuronal regeneration related protein                       | Upregulated |
| A_24_P336 | 0.00402  | 0.000879  | 2.17 RASSF5      | Ras association (RalGDS/AF-6) domain family member 5        | Upregulated |
| A_23_P714 | 0.004219 | 0.000946  | 2.17 WDYHV1      | WDYHV motif containing 1                                    | Upregulated |
| A_32_P203 | 0.005923 | 0.00155   | 2.17 ZNF30       | zinc finger protein 30                                      | Upregulated |
| A_21_P000 | 0.015222 | 0.00552   | 2.17 SCARNA8     | small Cajal body-specific RNA 8                             | Upregulated |
| A_33_P323 | 0.000705 | 0.0000332 | 2.16 ASUN        | asunder spermatogenesis regulator                           | Upregulated |

|           |          |           |      |              |                                                                            |             |
|-----------|----------|-----------|------|--------------|----------------------------------------------------------------------------|-------------|
| A_23_P114 | 0.000949 | 0.0000697 | 2.16 | MECR         | mitochondrial trans-2-enoyl-CoA reductase                                  | Upregulated |
| A_23_P145 | 0.000995 | 0.0000788 | 2.16 | CEP162       | centrosomal protein 162kDa                                                 | Upregulated |
| A_24_P636 | 0.001055 | 0.0000898 | 2.16 | CCDC84       | coiled-coil domain containing 84                                           | Upregulated |
| A_23_P158 | 0.001066 | 0.0000923 | 2.16 | SLC16A3      | solute carrier family 16 (monocarboxylate transporter), member 3           | Upregulated |
| A_21_P000 | 0.001603 | 0.000202  | 2.16 | TMEM41B      | transmembrane protein 41B                                                  | Upregulated |
| A_23_P207 | 0.001991 | 0.000298  | 2.16 | KSR1         | kinase suppressor of ras 1                                                 | Upregulated |
| A_32_P545 | 0.002454 | 0.000416  | 2.16 | USP41        | ubiquitin specific peptidase 41                                            | Upregulated |
| A_33_P341 | 0.003304 | 0.00066   | 2.16 | OR10A6       | olfactory receptor, family 10, subfamily A, member 6 (gene/pseudogene)     | Upregulated |
| A_21_P000 | 0.003535 | 0.000729  | 2.16 | lnc-AKR1E2-5 | lnc-AKR1E2-5:1                                                             | Upregulated |
| A_23_P653 | 0.000664 | 0.0000283 | 2.15 | GLRX5        | glutaredoxin 5                                                             | Upregulated |
| A_23_P256 | 0.00074  | 0.0000394 | 2.15 | SMARCA5      | SWI/SNF related, matrix associated, actin dependent regulator of chromatin | Upregulated |
| A_33_P332 | 0.000814 | 0.0000497 | 2.15 | MCUR1        | mitochondrial calcium uniporter regulator 1                                | Upregulated |
| A_33_P323 | 0.001397 | 0.000158  | 2.15 | WDR44        | WD repeat domain 44                                                        | Upregulated |
| A_23_P362 | 0.001534 | 0.000188  | 2.15 | CSTF1        | cleavage stimulation factor, 3' pre-RNA, subunit 1, 50kDa                  | Upregulated |
| A_23_P355 | 0.0017   | 0.000226  | 2.15 | AFG3L1P      | AFG3-like AAA ATPase 1, pseudogene                                         | Upregulated |
| A_22_P000 | 0.002221 | 0.000359  | 2.15 | LOC1005075   | uncharacterized LOC100507577                                               | Upregulated |
| A_22_P000 | 0.003572 | 0.000742  | 2.15 | lnc-M6PR-3   | lnc-M6PR-3:1                                                               | Upregulated |
| A_24_P226 | 0.007055 | 0.00199   | 2.15 | CEP120       | centrosomal protein 120kDa                                                 | Upregulated |
| A_23_P268 | 0.008594 | 0.00261   | 2.15 | TUBD1        | tubulin, delta 1                                                           | Upregulated |
| A_23_P212 | 0.000677 | 0.0000295 | 2.14 | CEP135       | centrosomal protein 135kDa                                                 | Upregulated |
| A_24_P360 | 0.000682 | 0.0000298 | 2.14 | RNASET2      | ribonuclease T2                                                            | Upregulated |
| A_23_P928 | 0.000832 | 0.0000522 | 2.14 | LOC389765    | kinesin family member 27 pseudogene                                        | Upregulated |
| A_24_P169 | 0.000875 | 0.0000581 | 2.14 | MAML2        | mastermind-like 2 (Drosophila)                                             | Upregulated |
| A_33_P338 | 0.001087 | 0.0000965 | 2.14 | ORC2         | origin recognition complex, subunit 2                                      | Upregulated |
| A_23_P791 | 0.001595 | 0.0002    | 2.14 | USE1         | unconventional SNARE in the ER 1 homolog (S. cerevisiae)                   | Upregulated |
| A_23_P614 | 0.00304  | 0.00058   | 2.14 | MSRA         | methionine sulfoxide reductase A                                           | Upregulated |
| A_23_P882 | 0.007422 | 0.00213   | 2.14 | EMC9         | ER membrane protein complex subunit 9                                      | Upregulated |
| A_21_P000 | 0.00791  | 0.00233   | 2.14 | TTC3P1       | tetratricopeptide repeat domain 3 pseudogene 1                             | Upregulated |
| A_21_P000 | 0.00895  | 0.00275   | 2.14 | lnc-GALC-3   | lnc-GALC-3:4                                                               | Upregulated |
| A_23_P634 | 0.000695 | 0.0000315 | 2.13 | GPSM2        | G-protein signaling modulator 2                                            | Upregulated |
| A_24_P329 | 0.000764 | 0.0000423 | 2.13 | ORAI2        | ORAI calcium release-activated calcium modulator 2                         | Upregulated |
| A_23_P101 | 0.000824 | 0.0000512 | 2.13 | DOT1L        | DOT1-like histone H3K79 methyltransferase                                  | Upregulated |
| A_21_P000 | 0.001098 | 0.0000988 | 2.13 | SNORA37      | small nucleolar RNA, H/ACA box 37                                          | Upregulated |
| A_33_P383 | 0.001661 | 0.000216  | 2.13 | LOC401433    | uncharacterized LOC401433                                                  | Upregulated |
| A_32_P158 | 0.002174 | 0.000348  | 2.13 | ALG1L        | ALG1, chitobiosyldiphosphodolichol beta-mannosyltransferase-like           | Upregulated |
| A_32_P328 | 0.002685 | 0.000479  | 2.13 | WDR33        | WD repeat domain 33                                                        | Upregulated |
| A_22_P000 | 0.012507 | 0.00427   | 2.13 | lnc-NPY2R-1  | lnc-NPY2R-1:1                                                              | Upregulated |

|           |          |           |      |             |                                                                       |             |
|-----------|----------|-----------|------|-------------|-----------------------------------------------------------------------|-------------|
| A_23_P171 | 0.000653 | 0.0000271 | 2.12 | PHF6        | PHD finger protein 6                                                  | Upregulated |
| A_23_P500 | 0.000679 | 0.0000296 | 2.12 | TNFRSF8     | tumor necrosis factor receptor superfamily, member 8                  | Upregulated |
| A_24_P732 | 0.000695 | 0.0000312 | 2.12 | ATP2A2      | ATPase, Ca <sup>++</sup> transporting, cardiac muscle, slow twitch 2  | Upregulated |
| A_23_P204 | 0.000707 | 0.0000335 | 2.12 | DNM1L       | dynamamin 1-like                                                      | Upregulated |
| A_33_P371 | 0.000783 | 0.0000449 | 2.12 | MIR146A     | microRNA 146a                                                         | Upregulated |
| A_23_P134 | 0.000971 | 0.0000743 | 2.12 | SOD2        | superoxide dismutase 2, mitochondrial                                 | Upregulated |
| A_23_P618 | 0.001154 | 0.00011   | 2.12 | BAIAP2      | BAI1-associated protein 2                                             | Upregulated |
| A_23_P254 | 0.001695 | 0.000224  | 2.12 | TATDN1      | TatD DNase domain containing 1                                        | Upregulated |
| A_24_P945 | 0.002104 | 0.000328  | 2.12 | CYP4V2      | cytochrome P450, family 4, subfamily V, polypeptide 2                 | Upregulated |
| A_22_P000 | 0.0038   | 0.000811  | 2.12 | SAMSN1-AS1  | SAMSN1 antisense RNA 1                                                | Upregulated |
| A_24_P166 | 0.01198  | 0.00404   | 2.12 | ZNRF1       | zinc and ring finger 1, E3 ubiquitin protein ligase                   | Upregulated |
| A_24_P944 | 0.000733 | 0.0000385 | 2.11 | SETD5       | SET domain containing 5                                               | Upregulated |
| A_33_P326 | 0.000779 | 0.0000443 | 2.11 | NCK2        | NCK adaptor protein 2                                                 | Upregulated |
| A_24_P941 | 0.000908 | 0.0000628 | 2.11 | SPAST       | spastin                                                               | Upregulated |
| A_22_P000 | 0.001375 | 0.000153  | 2.11 | lnc-MFN1-1  | lnc-MFN1-1:1                                                          | Upregulated |
| A_33_P336 | 0.001808 | 0.000251  | 2.11 | CLN5        | ceroid-lipofuscinosis, neuronal 5                                     | Upregulated |
| A_32_P150 | 0.001808 | 0.000251  | 2.11 | PPM1D       | protein phosphatase, Mg <sup>2+</sup> /Mn <sup>2+</sup> dependent, 1D | Upregulated |
| A_22_P000 | 0.002389 | 0.000401  | 2.11 | SLC2A13     | solute carrier family 2 (facilitated glucose transporter), member 13  | Upregulated |
| A_21_P000 | 0.002532 | 0.000438  | 2.11 | lnc-SLC12A8 | lnc-SLC12A8-1:1                                                       | Upregulated |
| A_33_P336 | 0.002738 | 0.000493  | 2.11 | PIK3R2      | phosphoinositide-3-kinase, regulatory subunit 2 (beta)                | Upregulated |
| A_33_P322 | 0.003614 | 0.000754  | 2.11 | LOC440896   | uncharacterized LOC440896                                             | Upregulated |
| A_21_P000 | 0.004101 | 0.000903  | 2.11 | lnc-CD180-7 | lnc-CD180-7:1                                                         | Upregulated |
| A_23_P121 | 0.005497 | 0.00139   | 2.11 | HS3ST1      | heparan sulfate (glucosamine) 3-O-sulfotransferase 1                  | Upregulated |
| A_21_P001 | 0.005759 | 0.00149   | 2.11 | IGSF11-AS1  | IGSF11 antisense RNA 1                                                | Upregulated |
| A_22_P000 | 0.006321 | 0.00171   | 2.11 | LOC1027239  | uncharacterized LOC102723924                                          | Upregulated |
| A_23_P986 | 0.008818 | 0.0027    | 2.11 | HPS5        | Hermansky-Pudlak syndrome 5                                           | Upregulated |
| A_22_P000 | 0.014897 | 0.00537   | 2.11 | lnc-CDK17-1 | lnc-CDK17-1:1                                                         | Upregulated |
| A_24_P177 | 0.000806 | 0.0000486 | 2.1  | PPP1R3F     | protein phosphatase 1, regulatory subunit 3F                          | Upregulated |
| A_21_P000 | 0.000812 | 0.0000494 | 2.1  | TMEM217     | transmembrane protein 217                                             | Upregulated |
| A_24_P243 | 0.000814 | 0.0000497 | 2.1  | ZNF277      | zinc finger protein 277                                               | Upregulated |
| A_33_P324 | 0.001013 | 0.000082  | 2.1  | PSG9        | pregnancy specific beta-1-glycoprotein 9                              | Upregulated |
| A_21_P000 | 0.001244 | 0.000128  | 2.1  | THRIL       | TNF and HNRNPL related immunoregulatory long non-coding RNA           | Upregulated |
| A_33_P354 | 0.00134  | 0.000146  | 2.1  | PHF20L1     | PHD finger protein 20-like 1                                          | Upregulated |
| A_23_P717 | 0.001533 | 0.000187  | 2.1  | MAMDC4      | MAM domain containing 4                                               | Upregulated |
| A_33_P327 | 0.001543 | 0.000189  | 2.1  | CNOT6L      | CCR4-NOT transcription complex, subunit 6-like                        | Upregulated |
| A_33_P326 | 0.001724 | 0.000231  | 2.1  | CEP68       | centrosomal protein 68kDa                                             | Upregulated |
| A_24_P670 | 0.001907 | 0.000275  | 2.1  | CLK2        | CDC-like kinase 2                                                     | Upregulated |

|           |          |           |      |                |                                                                 |             |
|-----------|----------|-----------|------|----------------|-----------------------------------------------------------------|-------------|
| A_33_P332 | 0.007348 | 0.0021    | 2.1  | PQBP1          | polyglutamine binding protein 1                                 | Upregulated |
| A_22_P000 | 0.018135 | 0.00689   | 2.1  | lnc-OSBPL9-2   | lnc-OSBPL9-2:1                                                  | Upregulated |
| A_24_P283 | 0.000717 | 0.0000364 | 2.09 | PCMT1          | protein-L-isoaspartate (D-aspartate) O-methyltransferase        | Upregulated |
| A_23_P387 | 0.000842 | 0.0000534 | 2.09 | ZNF830         | zinc finger protein 830                                         | Upregulated |
| A_23_P415 | 0.000927 | 0.0000655 | 2.09 | HARS2          | histidyl-tRNA synthetase 2, mitochondrial                       | Upregulated |
| A_23_P758 | 0.000954 | 0.0000704 | 2.09 | TCF7           | transcription factor 7 (T-cell specific, HMG-box)               | Upregulated |
| A_24_P338 | 0.000957 | 0.0000709 | 2.09 | STOML2         | stomatin (EPB72)-like 2                                         | Upregulated |
| A_33_P359 | 0.002568 | 0.000448  | 2.09 | OR7E12P        | olfactory receptor, family 7, subfamily E, member 12 pseudogene | Upregulated |
| A_23_P430 | 0.007133 | 0.00202   | 2.09 | MTERF3         | mitochondrial transcription termination factor 3                | Upregulated |
| A_24_P370 | 0.014157 | 0.00502   | 2.09 | ZNF230         | zinc finger protein 230                                         | Upregulated |
| A_22_P000 | 0.000695 | 0.0000313 | 2.08 | NBPF11         | neuroblastoma breakpoint family, member 11                      | Upregulated |
| A_33_P332 | 0.000752 | 0.0000409 | 2.08 | CEND1          | cell cycle exit and neuronal differentiation 1                  | Upregulated |
| A_22_P000 | 0.001047 | 0.000088  | 2.08 | DONSON         | downstream neighbor of SON                                      | Upregulated |
| A_24_P106 | 0.001624 | 0.000207  | 2.08 | WHSC1L1        | Wolf-Hirschhorn syndrome candidate 1-like 1                     | Upregulated |
| A_21_P000 | 0.001634 | 0.00021   | 2.08 | lnc-TULP4-1    | lnc-TULP4-1:1                                                   | Upregulated |
| A_21_P001 | 0.001958 | 0.000289  | 2.08 | XLOC_I2_013460 |                                                                 | Upregulated |
| A_33_P320 | 0.001979 | 0.000295  | 2.08 | PTAR1          | protein prenyltransferase alpha subunit repeat containing 1     | Upregulated |
| A_33_P340 | 0.004662 | 0.0011    | 2.08 | PLET1          | placenta expressed transcript 1                                 | Upregulated |
| A_22_P000 | 0.006282 | 0.00169   | 2.08 | SOX2-OT        | SOX2 overlapping transcript                                     | Upregulated |
| A_32_P123 | 0.006586 | 0.00181   | 2.08 | TTC39C         | tetratricopeptide repeat domain 39C                             | Upregulated |
| A_22_P000 | 0.009032 | 0.00279   | 2.08 | lnc-FKBP14-1   | lnc-FKBP14-1:1                                                  | Upregulated |
| A_21_P000 | 0.011018 | 0.00361   | 2.08 | SNORD111B      | small nucleolar RNA, C/D box 111B                               | Upregulated |
| A_22_P000 | 0.014247 | 0.00506   | 2.08 | TTY22          | testis-specific transcript, Y-linked 22 (non-protein coding)    | Upregulated |
| A_21_P001 | 0.000673 | 0.0000291 | 2.07 | RPS6KB1        | ribosomal protein S6 kinase, 70kDa, polypeptide 1               | Upregulated |
| A_32_P109 | 0.000701 | 0.0000328 | 2.07 | SFSWAP         | splicing factor, suppressor of white-apricot family             | Upregulated |
| A_23_P818 | 0.000706 | 0.0000334 | 2.07 | DYNLT1         | dynein, light chain, Tctex-type 1                               | Upregulated |
| A_24_P225 | 0.000707 | 0.0000338 | 2.07 | MOB4           | MOB family member 4, phocein                                    | Upregulated |
| A_22_P000 | 0.000777 | 0.000044  | 2.07 | LOC400541      | uncharacterized LOC400541                                       | Upregulated |
| A_24_P555 | 0.000966 | 0.0000734 | 2.07 | PHF23          | PHD finger protein 23                                           | Upregulated |
| A_32_P132 | 0.000995 | 0.0000784 | 2.07 | ZYG11A         | zyg-11 family member A, cell cycle regulator                    | Upregulated |
| A_23_P121 | 0.0011   | 0.0000991 | 2.07 | RAD18          | RAD18 E3 ubiquitin protein ligase                               | Upregulated |
| A_23_P679 | 0.001555 | 0.000192  | 2.07 | KLF7           | Kruppel-like factor 7 (ubiquitous)                              | Upregulated |
| A_33_P329 | 0.001686 | 0.000221  | 2.07 | TPRN           | taperin                                                         | Upregulated |
| A_23_P212 | 0.002381 | 0.000399  | 2.07 | ACAD11         | acyl-CoA dehydrogenase family, member 11                        | Upregulated |
| A_32_P506 | 0.00249  | 0.000426  | 2.07 | lnc-AP1S2-2    | lnc-AP1S2-2:1                                                   | Upregulated |
| A_23_P521 | 0.005019 | 0.00122   | 2.07 | ZNF124         | zinc finger protein 124                                         | Upregulated |
| A_23_P351 | 0.014529 | 0.00519   | 2.07 | CLDN9          | claudin 9                                                       | Upregulated |

|           |          |           |      |                |                                                                           |             |
|-----------|----------|-----------|------|----------------|---------------------------------------------------------------------------|-------------|
| A_21_P000 | 0.021045 | 0.00827   | 2.07 | lnc-PLP1-1     | lnc-PLP1-1:1                                                              | Upregulated |
| A_22_P000 | 0.000709 | 0.0000349 | 2.06 | lnc-SUMO1-1    | lnc-SUMO1-1:1                                                             | Upregulated |
| A_23_P928 | 0.000913 | 0.0000639 | 2.06 | RBM22          | RNA binding motif protein 22                                              | Upregulated |
| A_22_P000 | 0.000963 | 0.0000726 | 2.06 | lnc-CD59-1     | lnc-CD59-1:1                                                              | Upregulated |
| A_24_P230 | 0.001068 | 0.0000931 | 2.06 | MIER1          | mesoderm induction early response 1, transcriptional regulator            | Upregulated |
| A_24_P169 | 0.001419 | 0.000163  | 2.06 | ABCC4          | ATP-binding cassette, sub-family C (CFTR/MRP), member 4                   | Upregulated |
| A_33_P322 | 0.004577 | 0.00107   | 2.06 | SLC17A9        | solute carrier family 17 (vesicular nucleotide transporter), member 9     | Upregulated |
| A_33_P335 | 0.007112 | 0.00202   | 2.06 | IFITM10        | interferon induced transmembrane protein 10                               | Upregulated |
| A_32_P129 | 0.016044 | 0.0059    | 2.06 | ERMARD         | ER membrane-associated RNA degradation                                    | Upregulated |
| A_33_P361 | 0.000698 | 0.0000322 | 2.05 | ZBTB10         | zinc finger and BTB domain containing 10                                  | Upregulated |
| A_23_P134 | 0.000764 | 0.0000423 | 2.05 | EPB41L2        | erythrocyte membrane protein band 4.1-like 2                              | Upregulated |
| A_23_P411 | 0.000971 | 0.0000742 | 2.05 | PPP4R2         | protein phosphatase 4, regulatory subunit 2                               | Upregulated |
| A_33_P338 | 0.001214 | 0.000122  | 2.05 | ZNF233         | zinc finger protein 233                                                   | Upregulated |
| A_23_P105 | 0.001289 | 0.000136  | 2.05 | WBP11          | WW domain binding protein 11                                              | Upregulated |
| A_33_P330 | 0.002015 | 0.000304  | 2.05 | SETDB1         | SET domain, bifurcated 1                                                  | Upregulated |
| A_23_P365 | 0.003018 | 0.000573  | 2.05 | ITGA5          | integrin, alpha 5 (fibronectin receptor, alpha polypeptide)               | Upregulated |
| A_22_P000 | 0.004158 | 0.000924  | 2.05 | lnc-C3orf71-1  | lnc-C3orf71-1:2                                                           | Upregulated |
| A_24_P235 | 0.004677 | 0.0011    | 2.05 | ABCA1          | ATP-binding cassette, sub-family A (ABC1), member 1                       | Upregulated |
| A_33_P322 | 0.012488 | 0.00426   | 2.05 | ARHGAP27       | Rho GTPase activating protein 27                                          | Upregulated |
| A_33_P325 | 0.000675 | 0.0000293 | 2.04 | ITSN1          | intersectin 1 (SH3 domain protein)                                        | Upregulated |
| A_21_P001 | 0.0007   | 0.0000324 | 2.04 | XLOC_l2_000727 |                                                                           | Upregulated |
| A_23_P743 | 0.000739 | 0.000039  | 2.04 | SCYL3          | SCY1-like 3 (S. cerevisiae)                                               | Upregulated |
| A_23_P128 | 0.000752 | 0.0000408 | 2.04 | SOCS2          | suppressor of cytokine signaling 2                                        | Upregulated |
| A_33_P336 | 0.000776 | 0.0000439 | 2.04 | MANEAL         | mannosidase, endo-alpha-like                                              | Upregulated |
| A_24_P665 | 0.000776 | 0.0000439 | 2.04 | SRP9           | signal recognition particle 9kDa                                          | Upregulated |
| A_33_P331 | 0.000839 | 0.000053  | 2.04 | FSTL3          | follistatin-like 3 (secreted glycoprotein)                                | Upregulated |
| A_33_P336 | 0.001134 | 0.000106  | 2.04 | C10orf88       | chromosome 10 open reading frame 88                                       | Upregulated |
| A_23_P478 | 0.001249 | 0.000129  | 2.04 | STAT6          | signal transducer and activator of transcription 6, interleukin-4 induced | Upregulated |
| A_23_P556 | 0.001398 | 0.000158  | 2.04 | SFT2D3         | SFT2 domain containing 3                                                  | Upregulated |
| A_33_P324 | 0.002681 | 0.000477  | 2.04 | NFIC           | nuclear factor I/C (CCAAT-binding transcription factor)                   | Upregulated |
| A_22_P000 | 0.004321 | 0.000981  | 2.04 | lnc-RP11-33N   | lnc-RP11-33N16.1.1-2:1                                                    | Upregulated |
| A_21_P000 | 0.016242 | 0.006     | 2.04 | lnc-NHLRC3-1   | lnc-NHLRC3-1:1                                                            | Upregulated |
| A_24_P319 | 0.000728 | 0.0000379 | 2.03 | F11R           | F11 receptor                                                              | Upregulated |
| A_24_P214 | 0.000883 | 0.0000591 | 2.03 | TREML2         | triggering receptor expressed on myeloid cells-like 2                     | Upregulated |
| A_32_P182 | 0.000991 | 0.0000768 | 2.03 | ZNF511         | zinc finger protein 511                                                   | Upregulated |
| A_23_P412 | 0.001197 | 0.000118  | 2.03 | CLDN12         | claudin 12                                                                | Upregulated |
| A_33_P328 | 0.001638 | 0.000211  | 2.03 | SNX10          | sorting nexin 10                                                          | Upregulated |

|           |          |           |      |              |                                                                      |             |
|-----------|----------|-----------|------|--------------|----------------------------------------------------------------------|-------------|
| A_23_P360 | 0.001657 | 0.000215  | 2.03 | NEURL4       | neuralized E3 ubiquitin protein ligase 4                             | Upregulated |
| A_33_P327 | 0.001677 | 0.000219  | 2.03 | C20orf196    | chromosome 20 open reading frame 196                                 | Upregulated |
| A_22_P000 | 0.001784 | 0.000245  | 2.03 | lnc-FAM13B-1 | lnc-FAM13B-1:1                                                       | Upregulated |
| A_23_P406 | 0.001949 | 0.000286  | 2.03 | MOSPD2       | motile sperm domain containing 2                                     | Upregulated |
| A_24_P186 | 0.00284  | 0.000522  | 2.03 | ANAPC1       | anaphase promoting complex subunit 1                                 | Upregulated |
| A_22_P000 | 0.003265 | 0.000648  | 2.03 | lnc-ZBTB32-1 | lnc-ZBTB32-1:1                                                       | Upregulated |
| A_33_P341 | 0.004318 | 0.00098   | 2.03 | ABL2         | ABL proto-oncogene 2, non-receptor tyrosine kinase                   | Upregulated |
| A_33_P327 | 0.004411 | 0.00101   | 2.03 | DOPEY1       | dopey family member 1                                                | Upregulated |
| A_23_P845 | 0.004467 | 0.00103   | 2.03 | TOMM40L      | translocase of outer mitochondrial membrane 40 homolog (yeast)-like  | Upregulated |
| A_23_P369 | 0.004732 | 0.00112   | 2.03 | RANBP10      | RAN binding protein 10                                               | Upregulated |
| A_23_P374 | 0.005741 | 0.00148   | 2.03 | UBE2D4       | ubiquitin-conjugating enzyme E2D 4 (putative)                        | Upregulated |
| A_22_P000 | 0.006654 | 0.00184   | 2.03 | lnc-OR1Q1-1  | lnc-OR1Q1-1:1                                                        | Upregulated |
| A_33_P327 | 0.021889 | 0.00869   | 2.03 | NUP43        | nucleoporin 43kDa                                                    | Upregulated |
| A_23_P111 | 0.000702 | 0.000033  | 2.02 | BAG6         | BCL2-associated athanogene 6                                         | Upregulated |
| A_32_P634 | 0.000811 | 0.0000492 | 2.02 | MAP2K4       | mitogen-activated protein kinase kinase 4                            | Upregulated |
| A_23_P121 | 0.000938 | 0.0000672 | 2.02 | FLVCR1       | feline leukemia virus subgroup C cellular receptor 1                 | Upregulated |
| A_22_P000 | 0.002211 | 0.000356  | 2.02 | PLLP         | plasmolipin                                                          | Upregulated |
| A_23_P427 | 0.003564 | 0.000738  | 2.02 | SPPL3        | signal peptide peptidase like 3                                      | Upregulated |
| A_33_P332 | 0.006155 | 0.00164   | 2.02 | PLXNB2       | plexin B2                                                            | Upregulated |
| A_23_P184 | 0.000707 | 0.0000339 | 2.01 | MRPL3        | mitochondrial ribosomal protein L3                                   | Upregulated |
| A_32_P996 | 0.000867 | 0.0000573 | 2.01 | HSF2         | heat shock transcription factor 2                                    | Upregulated |
| A_21_P001 | 0.000908 | 0.0000627 | 2.01 | LOC389906    | zinc finger protein 839 pseudogene                                   | Upregulated |
| A_24_P888 | 0.001078 | 0.0000947 | 2.01 | COX7A2L      | cytochrome c oxidase subunit VIIa polypeptide 2 like                 | Upregulated |
| A_24_P101 | 0.012945 | 0.00446   | 2.01 | CNOT1        | CCR4-NOT transcription complex, subunit 1                            | Upregulated |
| A_23_P719 | 0.021038 | 0.00826   | 2.01 | ERAL1        | Era-like 12S mitochondrial rRNA chaperone 1                          | Upregulated |
| A_23_P207 | 0.000711 | 0.0000356 | 2    | KIAA0100     | KIAA0100                                                             | Upregulated |
| A_23_P300 | 0.000931 | 0.0000663 | 2    | NFKB1        | nuclear factor of kappa light polypeptide gene enhancer in B-cells 1 | Upregulated |
| A_23_P212 | 0.000963 | 0.0000726 | 2    | UBA7         | ubiquitin-like modifier activating enzyme 7                          | Upregulated |
| A_32_P252 | 0.001193 | 0.000117  | 2    | ISCA1        | iron-sulfur cluster assembly 1                                       | Upregulated |
| A_23_P160 | 0.001381 | 0.000154  | 2    | GLRX2        | glutaredoxin 2                                                       | Upregulated |
| A_32_P181 | 0.0016   | 0.000201  | 2    | DXO          | decapping exoribonuclease                                            | Upregulated |
| A_23_P164 | 0.001663 | 0.000217  | 2    | MED26        | mediator complex subunit 26                                          | Upregulated |
| A_23_P106 | 0.00185  | 0.000262  | 2    | SULT1A2      | sulfotransferase family, cytosolic, 1A, phenol-preferring, member 2  | Upregulated |
| A_32_P199 | 0.002391 | 0.000402  | 2    | SPTSSB       | serine palmitoyltransferase, small subunit B                         | Upregulated |
| A_23_P781 | 0.003005 | 0.00057   | 2    | ALDOC        | aldolase C, fructose-bisphosphate                                    | Upregulated |
| A_33_P337 | 0.006931 | 0.00194   | 2    | DTNA         | dystrobrevin, alpha                                                  | Upregulated |
| A_23_P198 | 0.008714 | 0.00266   | 2    | IQCE         | IQ motif containing E                                                | Upregulated |

|           |          |           |      |              |                                                                    |             |
|-----------|----------|-----------|------|--------------|--------------------------------------------------------------------|-------------|
| A_23_P312 | 0.018595 | 0.0071    | 2    | ARSK         | arylsulfatase family, member K                                     | Upregulated |
| A_23_P152 | 0.000709 | 0.0000349 | 1.99 | DDX42        | DEAD (Asp-Glu-Ala-Asp) box helicase 42                             | Upregulated |
| A_23_P803 | 0.000735 | 0.0000386 | 1.99 | TOMM22       | translocase of outer mitochondrial membrane 22 homolog (yeast)     | Upregulated |
| A_23_P206 | 0.000885 | 0.0000595 | 1.99 | KIAA0020     | KIAA0020                                                           | Upregulated |
| A_23_P321 | 0.000938 | 0.0000673 | 1.99 | LHX2         | LIM homeobox 2                                                     | Upregulated |
| A_23_P510 | 0.001177 | 0.000114  | 1.99 | ZNF142       | zinc finger protein 142                                            | Upregulated |
| A_23_P250 | 0.001222 | 0.000123  | 1.99 | ISOC1        | isochorismatase domain containing 1                                | Upregulated |
| A_24_P456 | 0.00335  | 0.000674  | 1.99 | UTS2         | urotensin 2                                                        | Upregulated |
| A_24_P117 | 0.003815 | 0.000815  | 1.99 | INO80C       | INO80 complex subunit C                                            | Upregulated |
| A_33_P350 | 0.004238 | 0.000953  | 1.99 | ZDHHC8P1     | zinc finger, DHHC-type containing 8 pseudogene 1                   | Upregulated |
| A_23_P211 | 0.007089 | 0.00201   | 1.99 | NRIP1        | nuclear receptor interacting protein 1                             | Upregulated |
| A_24_P295 | 0.010142 | 0.00326   | 1.99 | TSTD2        | thiosulfate sulfurtransferase (rhodanese)-like domain containing 2 | Upregulated |
| A_21_P000 | 0.000712 | 0.000036  | 1.98 | SNORD93      | small nucleolar RNA, C/D box 93                                    | Upregulated |
| A_21_P000 | 0.000764 | 0.0000423 | 1.98 | lnc-CLEC18B  | lnc-CLEC18B-1:1                                                    | Upregulated |
| A_24_P192 | 0.000801 | 0.0000477 | 1.98 | RALA         | v-ral simian leukemia viral oncogene homolog A (ras related)       | Upregulated |
| A_23_P384 | 0.001016 | 0.0000825 | 1.98 | PHF23        | PHD finger protein 23                                              | Upregulated |
| A_23_P322 | 0.001149 | 0.000109  | 1.98 | FAM177A1     | family with sequence similarity 177, member A1                     | Upregulated |
| A_33_P336 | 0.001297 | 0.000138  | 1.98 | NXT2         | nuclear transport factor 2-like export factor 2                    | Upregulated |
| A_33_P338 | 0.001521 | 0.000184  | 1.98 | DDB2         | damage-specific DNA binding protein 2, 48kDa                       | Upregulated |
| A_22_P000 | 0.001831 | 0.000258  | 1.98 | lnc-NT5DC2-1 | lnc-NT5DC2-1:1                                                     | Upregulated |
| A_24_P115 | 0.012088 | 0.00409   | 1.98 | EIF4EBP2     | eukaryotic translation initiation factor 4E binding protein 2      | Upregulated |
| A_23_P364 | 0.015515 | 0.00566   | 1.98 | MIS18BP1     | MIS18 binding protein 1                                            | Upregulated |
| A_32_P170 | 0.000809 | 0.000049  | 1.97 | TRAF3IP1     | TNF receptor-associated factor 3 interacting protein 1             | Upregulated |
| A_23_P801 | 0.001532 | 0.000187  | 1.97 | RRP1         | ribosomal RNA processing 1                                         | Upregulated |
| A_24_P172 | 0.001543 | 0.000189  | 1.97 | UBE2O        | ubiquitin-conjugating enzyme E2O                                   | Upregulated |
| A_21_P000 | 0.001562 | 0.000194  | 1.97 | lnc-TRIP10-1 | lnc-TRIP10-1:1                                                     | Upregulated |
| A_24_P398 | 0.002078 | 0.000322  | 1.97 | COQ7         | coenzyme Q7 homolog, ubiquinone (yeast)                            | Upregulated |
| A_21_P000 | 0.002101 | 0.000327  | 1.97 | lnc-AKR1E2-5 | lnc-AKR1E2-5:7                                                     | Upregulated |
| A_21_P001 | 0.015689 | 0.00573   | 1.97 | LINC01127    | long intergenic non-protein coding RNA 1127                        | Upregulated |
| A_24_P391 | 0.020261 | 0.00789   | 1.97 | KCTD10       | potassium channel tetramerization domain containing 10             | Upregulated |
| A_33_P322 | 0.000741 | 0.0000396 | 1.96 | HSD17B7      | hydroxysteroid (17-beta) dehydrogenase 7                           | Upregulated |
| A_21_P000 | 0.001053 | 0.0000891 | 1.96 | LINC01506    | long intergenic non-protein coding RNA 1506                        | Upregulated |
| A_33_P329 | 0.001863 | 0.000265  | 1.96 | ABCC5        | ATP-binding cassette, sub-family C (CFTR/MRP), member 5            | Upregulated |
| A_23_P150 | 0.001935 | 0.000282  | 1.96 | C11orf68     | chromosome 11 open reading frame 68                                | Upregulated |
| A_21_P000 | 0.002896 | 0.000538  | 1.96 | SNORD96A     | small nucleolar RNA, C/D box 96A                                   | Upregulated |
| A_33_P330 | 0.004447 | 0.00102   | 1.96 | SZT2         | seizure threshold 2 homolog (mouse)                                | Upregulated |
| A_22_P000 | 0.012184 | 0.00413   | 1.96 | lnc-NR2C2-1  | lnc-NR2C2-1:1                                                      | Upregulated |

|           |          |           |      |                |                                                                      |             |
|-----------|----------|-----------|------|----------------|----------------------------------------------------------------------|-------------|
| A_23_P585 | 0.021337 | 0.00841   | 1.96 | ERCC8          | excision repair cross-complementation group 8                        | Upregulated |
| A_23_P126 | 0.000725 | 0.0000376 | 1.95 | RAB29          | RAB29, member RAS oncogene family                                    | Upregulated |
| A_23_P130 | 0.000765 | 0.0000425 | 1.95 | UTP18          | UTP18 small subunit (SSU) processome component homolog (yeast)       | Upregulated |
| A_23_P157 | 0.00082  | 0.0000508 | 1.95 | DENND4C        | DENN/MADD domain containing 4C                                       | Upregulated |
| A_23_P149 | 0.0011   | 0.000099  | 1.95 | COQ9           | coenzyme Q9                                                          | Upregulated |
| A_24_P288 | 0.001432 | 0.000165  | 1.95 | PIGA           | phosphatidylinositol glycan anchor biosynthesis, class A             | Upregulated |
| A_23_P255 | 0.00332  | 0.000666  | 1.95 | TMEM185A       | transmembrane protein 185A                                           | Upregulated |
| A_32_P164 | 0.004602 | 0.00108   | 1.95 | MRPL35         | mitochondrial ribosomal protein L35                                  | Upregulated |
| A_23_P217 | 0.005598 | 0.00143   | 1.95 | COL4A6         | collagen, type IV, alpha 6                                           | Upregulated |
| A_23_P136 | 0.006443 | 0.00176   | 1.95 | PDCD1          | programmed cell death 1                                              | Upregulated |
| A_23_P316 | 0.008344 | 0.00251   | 1.95 | CCAR2          | cell cycle and apoptosis regulator 2                                 | Upregulated |
| A_22_P000 | 0.016221 | 0.00599   | 1.95 | lnc-OIT3-1     | lnc-OIT3-1:1                                                         | Upregulated |
| A_21_P001 | 0.017522 | 0.0066    | 1.95 | XLOC_I2_015213 |                                                                      | Upregulated |
| A_21_P001 | 0.021277 | 0.00838   | 1.95 | CECR7          | cat eye syndrome chromosome region, candidate 7 (non-protein coding) | Upregulated |
| A_23_P202 | 0.000737 | 0.0000388 | 1.94 | ABLIM1         | actin binding LIM protein 1                                          | Upregulated |
| A_24_P343 | 0.000766 | 0.0000428 | 1.94 | DHFR           | dihydrofolate reductase                                              | Upregulated |
| A_33_P327 | 0.000781 | 0.0000446 | 1.94 | ARID3A         | AT rich interactive domain 3A (BRIGHT-like)                          | Upregulated |
| A_33_P341 | 0.000826 | 0.0000515 | 1.94 | CLCC1          | chloride channel CLIC-like 1                                         | Upregulated |
| A_33_P330 | 0.000846 | 0.0000538 | 1.94 | RBM20          | RNA binding motif protein 20                                         | Upregulated |
| A_33_P327 | 0.000887 | 0.0000596 | 1.94 | NINJ1          | ninjurin 1                                                           | Upregulated |
| A_24_P100 | 0.001137 | 0.000107  | 1.94 | ZNF486         | zinc finger protein 486                                              | Upregulated |
| A_21_P000 | 0.00144  | 0.000167  | 1.94 | lnc-AC00498    | lnc-AC004980.12.1-1:1                                                | Upregulated |
| A_21_P000 | 0.001691 | 0.000222  | 1.94 | RBM34          | RNA binding motif protein 34                                         | Upregulated |
| A_24_P225 | 0.001698 | 0.000225  | 1.94 | RRM2           | ribonucleotide reductase M2                                          | Upregulated |
| A_23_P250 | 0.003998 | 0.000873  | 1.94 | WRN            | Werner syndrome, RecQ helicase-like                                  | Upregulated |
| A_33_P323 | 0.005643 | 0.00145   | 1.94 | OR52E2         | olfactory receptor, family 52, subfamily E, member 2                 | Upregulated |
| A_33_P321 | 0.000765 | 0.0000426 | 1.93 | C5orf42        | chromosome 5 open reading frame 42                                   | Upregulated |
| A_33_P339 | 0.000798 | 0.0000472 | 1.93 | CLLU1OS        | chronic lymphocytic leukemia up-regulated 1 opposite strand          | Upregulated |
| A_23_P134 | 0.000839 | 0.0000531 | 1.93 | BNIP3L         | BCL2/adenovirus E1B 19kDa interacting protein 3-like                 | Upregulated |
| A_33_P331 | 0.000848 | 0.0000542 | 1.93 | GCH1           | GTP cyclohydrolase 1                                                 | Upregulated |
| A_23_P411 | 0.000888 | 0.00006   | 1.93 | SPRYD4         | SPRY domain containing 4                                             | Upregulated |
| A_23_P133 | 0.001163 | 0.000112  | 1.93 | ALPK1          | alpha-kinase 1                                                       | Upregulated |
| A_33_P321 | 0.001349 | 0.000148  | 1.93 | NET1           | neuroepithelial cell transforming 1                                  | Upregulated |
| A_22_P000 | 0.001479 | 0.000176  | 1.93 | lnc-C20orf94-  | lnc-C20orf94-1:1                                                     | Upregulated |
| A_33_P337 | 0.001861 | 0.000265  | 1.93 | PRICKLE3       | prickle homolog 3 (Drosophila)                                       | Upregulated |
| A_23_P454 | 0.001959 | 0.00029   | 1.93 | GLA            | galactosidase, alpha                                                 | Upregulated |
| A_33_P337 | 0.002243 | 0.000366  | 1.93 | MRS2           | MRS2 magnesium transporter                                           | Upregulated |



|           |          |           |      |                |                                                                       |             |
|-----------|----------|-----------|------|----------------|-----------------------------------------------------------------------|-------------|
| A_21_P001 | 0.003187 | 0.000626  | 1.93 | HERC2P4        | hect domain and RLD 2 pseudogene 4                                    | Upregulated |
| A_22_P000 | 0.003388 | 0.000684  | 1.93 | lnc-SLC12A7    | lnc-SLC12A7-1:9                                                       | Upregulated |
| A_23_P204 | 0.006166 | 0.00165   | 1.93 | GIT2           | G protein-coupled receptor kinase interacting ArfGAP 2                | Upregulated |
| A_33_P333 | 0.012106 | 0.0041    | 1.93 | SCYL2          | SCY1-like 2 ( <i>S. cerevisiae</i> )                                  | Upregulated |
| A_33_P338 | 0.024076 | 0.0098    | 1.93 | TRIM61         | tripartite motif containing 61                                        | Upregulated |
| A_23_P983 | 0.000827 | 0.0000516 | 1.92 | BIRC3          | baculoviral IAP repeat containing 3                                   | Upregulated |
| A_23_P361 | 0.000986 | 0.0000763 | 1.92 | CCND3          | cyclin D3                                                             | Upregulated |
| A_23_P125 | 0.001022 | 0.0000837 | 1.92 | ACOT9          | acyl-CoA thioesterase 9                                               | Upregulated |
| A_22_P000 | 0.001037 | 0.0000862 | 1.92 | XIRP2-AS1      | XIRP2 antisense RNA 1                                                 | Upregulated |
| A_23_P922 | 0.00104  | 0.0000866 | 1.92 | TSC22D2        | TSC22 domain family, member 2                                         | Upregulated |
| A_23_P161 | 0.001046 | 0.0000879 | 1.92 | OR7E24         | olfactory receptor, family 7, subfamily E, member 24                  | Upregulated |
| A_23_P112 | 0.001085 | 0.0000957 | 1.92 | ALG13          | ALG13, UDP-N-acetylglucosaminyltransferase subunit                    | Upregulated |
| A_23_P103 | 0.001121 | 0.000104  | 1.92 | LRRC8C         | leucine rich repeat containing 8 family, member C                     | Upregulated |
| A_24_P187 | 0.001322 | 0.000142  | 1.92 | RPAIN          | RPA interacting protein                                               | Upregulated |
| A_23_P383 | 0.001386 | 0.000155  | 1.92 | HIC2           | hypermethylated in cancer 2                                           | Upregulated |
| A_23_P134 | 0.001763 | 0.00024   | 1.92 | DUSP4          | dual specificity phosphatase 4                                        | Upregulated |
| A_23_P647 | 0.001959 | 0.00029   | 1.92 | HCAR3          | hydroxycarboxylic acid receptor 3                                     | Upregulated |
| A_21_P001 | 0.001991 | 0.000298  | 1.92 | XLOC_I2_007835 |                                                                       | Upregulated |
| A_23_P379 | 0.00203  | 0.000309  | 1.92 | PIGW           | phosphatidylinositol glycan anchor biosynthesis, class W              | Upregulated |
| A_23_P413 | 0.002693 | 0.000481  | 1.92 | LYAR           | Ly1 antibody reactive                                                 | Upregulated |
| A_32_P113 | 0.003684 | 0.000774  | 1.92 | ZNF561         | zinc finger protein 561                                               | Upregulated |
| A_23_P373 | 0.004849 | 0.00116   | 1.92 | PPFIBP1        | PTPRF interacting protein, binding protein 1 (liprin beta 1)          | Upregulated |
| A_33_P331 | 0.005444 | 0.00138   | 1.92 | HSP90AB4P      | heat shock protein 90kDa alpha (cytosolic), class B member 4, pseudog | Upregulated |
| A_23_P115 | 0.006071 | 0.00161   | 1.92 | ZNF684         | zinc finger protein 684                                               | Upregulated |
| A_23_P430 | 0.00674  | 0.00187   | 1.92 | ZBTB3          | zinc finger and BTB domain containing 3                               | Upregulated |
| A_22_P000 | 0.011699 | 0.00392   | 1.92 | CPB2-AS1       | CPB2 antisense RNA 1                                                  | Upregulated |
| A_33_P339 | 0.019143 | 0.00737   | 1.92 | CALML4         | calmodulin-like 4                                                     | Upregulated |
| A_21_P000 | 0.028604 | 0.0122    | 1.92 | lnc-GBP5-2     | lnc-GBP5-2:2                                                          | Upregulated |
| A_22_P000 | 0.00093  | 0.000066  | 1.91 | lnc-WDR45L-1   | lnc-WDR45L-1:1                                                        | Upregulated |
| A_22_P000 | 0.00108  | 0.000095  | 1.91 | lnc-PEAK1.1-2  | lnc-PEAK1.1-2:1                                                       | Upregulated |
| A_33_P336 | 0.00134  | 0.000146  | 1.91 | ATR            | ATR serine/threonine kinase                                           | Upregulated |
| A_23_P806 | 0.001403 | 0.000159  | 1.91 | MFN1           | mitofusin 1                                                           | Upregulated |
| A_24_P368 | 0.001719 | 0.00023   | 1.91 | SLC25A26       | solute carrier family 25 (S-adenosylmethionine carrier), member 26    | Upregulated |
| A_33_P321 | 0.001808 | 0.000251  | 1.91 | UPF2           | UPF2 regulator of nonsense transcripts homolog (yeast)                | Upregulated |
| A_22_P000 | 0.002    | 0.0003    | 1.91 | SNHG15         | small nucleolar RNA host gene 15 (non-protein coding)                 | Upregulated |
| A_23_P168 | 0.002167 | 0.000346  | 1.91 | POMZP3         | POM121 and ZP3 fusion                                                 | Upregulated |
| A_22_P000 | 0.002188 | 0.000351  | 1.91 | GRAMD1A        | GRAM domain containing 1A                                             | Upregulated |

|           |          |           |      |              |                                                                  |             |
|-----------|----------|-----------|------|--------------|------------------------------------------------------------------|-------------|
| A_22_P000 | 0.002631 | 0.000465  | 1.91 | LOC1019276   | uncharacterized LOC101927640                                     | Upregulated |
| A_33_P327 | 0.002966 | 0.000557  | 1.91 | CHM          | choroideremia (Rab escort protein 1)                             | Upregulated |
| A_33_P330 | 0.004482 | 0.00104   | 1.91 | CEP57L1      | centrosomal protein 57kDa-like 1                                 | Upregulated |
| A_33_P336 | 0.004946 | 0.00119   | 1.91 | TNKS1BP1     | tankyrase 1 binding protein 1, 182kDa                            | Upregulated |
| A_33_P337 | 0.007062 | 0.002     | 1.91 | SESTD1       | SEC14 and spectrin domains 1                                     | Upregulated |
| A_24_P276 | 0.007622 | 0.00222   | 1.91 | LRRC42       | leucine rich repeat containing 42                                | Upregulated |
| A_33_P327 | 0.00825  | 0.00247   | 1.91 | PHF20L1      | PHD finger protein 20-like 1                                     | Upregulated |
| A_23_P110 | 0.011822 | 0.00398   | 1.91 | TRAF3IP2     | TRAF3 interacting protein 2                                      | Upregulated |
| A_23_P202 | 0.012661 | 0.00433   | 1.91 | NOLC1        | nucleolar and coiled-body phosphoprotein 1                       | Upregulated |
| A_23_P379 | 0.021637 | 0.00856   | 1.91 | DHCR24       | 24-dehydrocholesterol reductase                                  | Upregulated |
| A_33_P334 | 0.022799 | 0.00914   | 1.91 | GIN54        | GIN5 complex subunit 4 (Sld5 homolog)                            | Upregulated |
| A_24_P143 | 0.000839 | 0.0000532 | 1.9  | PTBP1        | polypyrimidine tract binding protein 1                           | Upregulated |
| A_22_P000 | 0.000847 | 0.000054  | 1.9  | lnc-RP11-582 | lnc-RP11-582J16.5.1-1:1                                          | Upregulated |
| A_23_P152 | 0.000848 | 0.0000544 | 1.9  | BCL2A1       | BCL2-related protein A1                                          | Upregulated |
| A_23_P102 | 0.001132 | 0.000105  | 1.9  | MRPL53       | mitochondrial ribosomal protein L53                              | Upregulated |
| A_19_P003 | 0.001134 | 0.000106  | 1.9  | LINC-PINT    | long intergenic non-protein coding RNA, p53 induced transcript   | Upregulated |
| A_22_P000 | 0.001139 | 0.000107  | 1.9  | LOC1019291   | uncharacterized LOC101929124                                     | Upregulated |
| A_24_P238 | 0.001141 | 0.000108  | 1.9  | NSA2         | NSA2 ribosome biogenesis homolog (S. cerevisiae)                 | Upregulated |
| A_23_P565 | 0.001453 | 0.00017   | 1.9  | GEMIN6       | gem (nuclear organelle) associated protein 6                     | Upregulated |
| A_24_P305 | 0.001637 | 0.000211  | 1.9  | TMEM50B      | transmembrane protein 50B                                        | Upregulated |
| A_32_P451 | 0.0017   | 0.000226  | 1.9  | IL6ST        | interleukin 6 signal transducer                                  | Upregulated |
| A_23_P550 | 0.00193  | 0.000281  | 1.9  | FTSJ3        | FtsJ homolog 3 (E. coli)                                         | Upregulated |
| A_24_P408 | 0.002275 | 0.000373  | 1.9  | ZNF587B      | zinc finger protein 587B                                         | Upregulated |
| A_33_P324 | 0.003028 | 0.000576  | 1.9  | C2CD2        | C2 calcium-dependent domain containing 2                         | Upregulated |
| A_23_P904 | 0.003228 | 0.000638  | 1.9  | SARS2        | seryl-tRNA synthetase 2, mitochondrial                           | Upregulated |
| A_33_P337 | 0.004217 | 0.000945  | 1.9  | ZNF81        | zinc finger protein 81                                           | Upregulated |
| A_33_P329 | 0.004813 | 0.00115   | 1.9  | TCEAL8       | transcription elongation factor A (SII)-like 8                   | Upregulated |
| A_23_P320 | 0.005114 | 0.00125   | 1.9  | SRXN1        | sulfiredoxin 1                                                   | Upregulated |
| A_23_P553 | 0.006095 | 0.00162   | 1.9  | KLHL11       | kelch-like family member 11                                      | Upregulated |
| A_23_P336 | 0.011364 | 0.00377   | 1.9  | NOC2L        | nucleolar complex associated 2 homolog (S. cerevisiae)           | Upregulated |
| A_23_P912 | 0.028617 | 0.0122    | 1.9  | CASS4        | Cas scaffolding protein family member 4                          | Upregulated |
| A_33_P330 | 0.000763 | 0.000042  | 1.89 | DGKZ         | diacylglycerol kinase, zeta                                      | Upregulated |
| A_21_P001 | 0.000858 | 0.0000561 | 1.89 | LOC1019284   | serine/threonine-protein kinase tousled-like 2-like              | Upregulated |
| A_32_P366 | 0.000933 | 0.0000666 | 1.89 | JAZF1        | JAZF zinc finger 1                                               | Upregulated |
| A_24_P982 | 0.001235 | 0.000126  | 1.89 | EBAG9        | estrogen receptor binding site associated, antigen, 9            | Upregulated |
| A_23_P247 | 0.001437 | 0.000166  | 1.89 | TTC9C        | tetratricopeptide repeat domain 9C                               | Upregulated |
| A_24_P359 | 0.001544 | 0.00019   | 1.89 | SLC6A6       | solute carrier family 6 (neurotransmitter transporter), member 6 | Upregulated |

|           |          |           |      |              |                                                        |             |
|-----------|----------|-----------|------|--------------|--------------------------------------------------------|-------------|
| A_23_P129 | 0.001563 | 0.000194  | 1.89 | DUSP3        | dual specificity phosphatase 3                         | Upregulated |
| A_23_P301 | 0.00167  | 0.000218  | 1.89 | ZNF572       | zinc finger protein 572                                | Upregulated |
| A_24_P140 | 0.003709 | 0.000782  | 1.89 | PXK          | PX domain containing serine/threonine kinase           | Upregulated |
| A_22_P000 | 0.005249 | 0.0013    | 1.89 | lnc-COL6A2-1 | lnc-COL6A2-1:1                                         | Upregulated |
| A_33_P329 | 0.007299 | 0.00209   | 1.89 | SPATA13      | spermatogenesis associated 13                          | Upregulated |
| A_24_P416 | 0.012225 | 0.00415   | 1.89 | PEX12        | peroxisomal biogenesis factor 12                       | Upregulated |
| A_32_P263 | 0.000777 | 0.000044  | 1.88 | POGLUT1      | protein O-glucosyltransferase 1                        | Upregulated |
| A_33_P334 | 0.000863 | 0.0000566 | 1.88 | ZNF43        | zinc finger protein 43                                 | Upregulated |
| A_23_P256 | 0.000876 | 0.0000583 | 1.88 | FBXO30       | F-box protein 30                                       | Upregulated |
| A_23_P151 | 0.000938 | 0.0000678 | 1.88 | LIMA1        | LIM domain and actin binding 1                         | Upregulated |
| A_23_P252 | 0.001076 | 0.0000943 | 1.88 | APTX         | aprataxin                                              | Upregulated |
| A_33_P329 | 0.001548 | 0.000191  | 1.88 | CCDC174      | coiled-coil domain containing 174                      | Upregulated |
| A_21_P001 | 0.002158 | 0.000343  | 1.88 | LINC00869    | long intergenic non-protein coding RNA 869             | Upregulated |
| A_23_P756 | 0.002804 | 0.000511  | 1.88 | HYOU1        | hypoxia up-regulated 1                                 | Upregulated |
| A_21_P000 | 0.003421 | 0.000694  | 1.88 | LINC00673    | long intergenic non-protein coding RNA 673             | Upregulated |
| A_33_P341 | 0.003914 | 0.000847  | 1.88 | ADAMTSL1     | ADAMTS-like 1                                          | Upregulated |
| A_33_P323 | 0.014445 | 0.00515   | 1.88 | HMGB3        | high mobility group box 3                              | Upregulated |
| A_23_P814 | 0.024907 | 0.0102    | 1.88 | MAT2B        | methionine adenosyltransferase II, beta                | Upregulated |
| A_22_P000 | 0.025043 | 0.0103    | 1.88 | lnc-IL6-2    | lnc-IL6-2:2                                            | Upregulated |
| A_32_P252 | 0.000786 | 0.0000454 | 1.87 | HSPD1        | heat shock 60kDa protein 1 (chaperonin)                | Upregulated |
| A_23_P141 | 0.001314 | 0.000141  | 1.87 | TNFSF13B     | tumor necrosis factor (ligand) superfamily, member 13b | Upregulated |
| A_24_P317 | 0.001356 | 0.000149  | 1.87 | LY6E         | lymphocyte antigen 6 complex, locus E                  | Upregulated |
| A_33_P335 | 0.001529 | 0.000186  | 1.87 | CSF1         | colony stimulating factor 1 (macrophage)               | Upregulated |
| A_23_P206 | 0.001692 | 0.000223  | 1.87 | PRC1         | protein regulator of cytokinesis 1                     | Upregulated |
| A_22_P000 | 0.002638 | 0.000466  | 1.87 | lnc-NCL-2    | lnc-NCL-2:1                                            | Upregulated |
| A_33_P325 | 0.003875 | 0.000834  | 1.87 | WDR5B        | WD repeat domain 5B                                    | Upregulated |
| A_21_P000 | 0.004955 | 0.00119   | 1.87 | LOC1027244   | uncharacterized LOC102724458                           | Upregulated |
| A_32_P118 | 0.013292 | 0.00461   | 1.87 | DHRS4-AS1    | DHRS4 antisense RNA 1                                  | Upregulated |
| A_23_P255 | 0.014932 | 0.00539   | 1.87 | RP9          | retinitis pigmentosa 9 (autosomal dominant)            | Upregulated |
| A_23_P130 | 0.021912 | 0.0087    | 1.87 | ERCC2        | excision repair cross-complementation group 2          | Upregulated |
| A_24_P276 | 0.028727 | 0.0122    | 1.87 | SPACA5       | sperm acrosome associated 5                            | Upregulated |
| A_23_P140 | 0.000762 | 0.0000419 | 1.86 | WBP4         | WW domain binding protein 4                            | Upregulated |
| A_33_P357 | 0.000938 | 0.0000677 | 1.86 | LOC158863    | uncharacterized LOC158863                              | Upregulated |
| A_33_P334 | 0.00098  | 0.0000757 | 1.86 | PIKFYVE      | phosphoinositide kinase, FYVE finger containing        | Upregulated |
| A_33_P330 | 0.001299 | 0.000139  | 1.86 | BLCAP        | bladder cancer associated protein                      | Upregulated |
| A_33_P337 | 0.001499 | 0.00018   | 1.86 | LOC392364    | nuclear pore associated protein 1 pseudogene           | Upregulated |
| A_21_P001 | 0.001633 | 0.00021   | 1.86 | LOC1019269   | uncharacterized LOC101926936                           | Upregulated |

|           |          |           |      |              |                                                                            |             |
|-----------|----------|-----------|------|--------------|----------------------------------------------------------------------------|-------------|
| A_23_P431 | 0.003032 | 0.000578  | 1.86 | C14orf80     | chromosome 14 open reading frame 80                                        | Upregulated |
| A_19_P008 | 0.003155 | 0.000615  | 1.86 | SNHG20       | small nucleolar RNA host gene 20 (non-protein coding)                      | Upregulated |
| A_33_P321 | 0.011144 | 0.00367   | 1.86 | GALNT6       | polypeptide N-acetylgalactosaminyltransferase 6                            | Upregulated |
| A_23_P103 | 0.019852 | 0.0077    | 1.86 | OSCP1        | organic solute carrier partner 1                                           | Upregulated |
| A_33_P328 | 0.034167 | 0.0151    | 1.86 | ATP9B        | ATPase, class II, type 9B                                                  | Upregulated |
| A_23_P438 | 0.000766 | 0.0000428 | 1.85 | LAX1         | lymphocyte transmembrane adaptor 1                                         | Upregulated |
| A_24_P253 | 0.000793 | 0.0000466 | 1.85 | SLC7A1       | solute carrier family 7 (cationic amino acid transporter, y+ system), memt | Upregulated |
| A_23_P161 | 0.000863 | 0.0000566 | 1.85 | CWF19L2      | CWF19-like 2, cell cycle control (S. pombe)                                | Upregulated |
| A_24_P124 | 0.001036 | 0.000086  | 1.85 | TRAM2        | translocation associated membrane protein 2                                | Upregulated |
| A_23_P226 | 0.001107 | 0.000101  | 1.85 | VAMP7        | vesicle-associated membrane protein 7                                      | Upregulated |
| A_33_P334 | 0.001216 | 0.000122  | 1.85 | TMEM45A      | transmembrane protein 45A                                                  | Upregulated |
| A_23_P757 | 0.001754 | 0.000238  | 1.85 | MYRF         | myelin regulatory factor                                                   | Upregulated |
| A_23_P218 | 0.002224 | 0.00036   | 1.85 | NARF         | nuclear prelamin A recognition factor                                      | Upregulated |
| A_22_P000 | 0.002528 | 0.000438  | 1.85 | lnc-FAM40A-1 | lnc-FAM40A-1:1                                                             | Upregulated |
| A_23_P512 | 0.004335 | 0.000986  | 1.85 | PARS2        | prolyl-tRNA synthetase 2, mitochondrial (putative)                         | Upregulated |
| A_33_P341 | 0.005502 | 0.0014    | 1.85 | NCCRP1       | non-specific cytotoxic cell receptor protein 1 homolog (zebrafish)         | Upregulated |
| A_23_P999 | 0.005797 | 0.00151   | 1.85 | TIPIN        | TIMELESS interacting protein                                               | Upregulated |
| A_33_P332 | 0.006632 | 0.00183   | 1.85 | ESCO2        | establishment of sister chromatid cohesion N-acetyltransferase 2           | Upregulated |
| A_33_P326 | 0.007887 | 0.00232   | 1.85 | ZNF616       | zinc finger protein 616                                                    | Upregulated |
| A_32_P480 | 0.008458 | 0.00255   | 1.85 | EYS          | eyes shut homolog (Drosophila)                                             | Upregulated |
| A_23_P589 | 0.010635 | 0.00346   | 1.85 | NQO2         | NAD(P)H dehydrogenase, quinone 2                                           | Upregulated |
| A_21_P001 | 0.012852 | 0.00442   | 1.85 | LINC01128    | long intergenic non-protein coding RNA 1128                                | Upregulated |
| A_23_P298 | 0.000781 | 0.0000446 | 1.84 | USO1         | USO1 vesicle transport factor                                              | Upregulated |
| A_32_P109 | 0.000814 | 0.0000499 | 1.84 | ANKRD20A12   | ankyrin repeat domain 20 family, member A12, pseudogene                    | Upregulated |
| A_24_P150 | 0.000824 | 0.0000513 | 1.84 | KLHL18       | kelch-like family member 18                                                | Upregulated |
| A_33_P323 | 0.000853 | 0.000055  | 1.84 | MLLT4        | myeloid/lymphoid or mixed-lineage leukemia (trithorax homolog, Drosop      | Upregulated |
| A_33_P323 | 0.000912 | 0.0000636 | 1.84 | NSDHL        | NAD(P) dependent steroid dehydrogenase-like                                | Upregulated |
| A_21_P000 | 0.000974 | 0.0000748 | 1.84 | RAB6C-AS1    | RAB6C antisense RNA 1                                                      | Upregulated |
| A_23_P395 | 0.001004 | 0.0000806 | 1.84 | KDM3A        | lysine (K)-specific demethylase 3A                                         | Upregulated |
| A_23_P845 | 0.001067 | 0.0000928 | 1.84 | LFNG         | LFNG O-fucosylpeptide 3-beta-N-acetylglucosaminyltransferase               | Upregulated |
| A_23_P397 | 0.002459 | 0.000417  | 1.84 | KLC4         | kinesin light chain 4                                                      | Upregulated |
| A_24_P206 | 0.0032   | 0.00063   | 1.84 | PDE1C        | phosphodiesterase 1C, calmodulin-dependent 70kDa                           | Upregulated |
| A_33_P333 | 0.004149 | 0.00092   | 1.84 | PDLIM5       | PDZ and LIM domain 5                                                       | Upregulated |
| A_23_P373 | 0.004819 | 0.00115   | 1.84 | PATL1        | protein associated with topoisomerase II homolog 1 (yeast)                 | Upregulated |
| A_23_P130 | 0.006012 | 0.00159   | 1.84 | ELOF1        | elongation factor 1 homolog (S. cerevisiae)                                | Upregulated |
| A_32_P440 | 0.006067 | 0.00161   | 1.84 | C16orf72     | chromosome 16 open reading frame 72                                        | Upregulated |
| A_33_P329 | 0.006315 | 0.0017    | 1.84 | WDR5         | WD repeat domain 5                                                         | Upregulated |

|           |          |           |      |                |                                                                       |             |
|-----------|----------|-----------|------|----------------|-----------------------------------------------------------------------|-------------|
| A_19_P008 | 0.007301 | 0.00209   | 1.84 | LOC1019295     | uncharacterized LOC101929580                                          | Upregulated |
| A_24_P219 | 0.009235 | 0.00287   | 1.84 | GPALPP1        | GPALPP motifs containing 1                                            | Upregulated |
| A_33_P326 | 0.015684 | 0.00573   | 1.84 | ZNF280D        | zinc finger protein 280D                                              | Upregulated |
| A_33_P331 | 0.000837 | 0.0000526 | 1.83 | CAB39          | calcium binding protein 39                                            | Upregulated |
| A_33_P338 | 0.000884 | 0.0000593 | 1.83 | CDT1           | chromatin licensing and DNA replication factor 1                      | Upregulated |
| A_33_P322 | 0.000901 | 0.0000613 | 1.83 | ZNF331         | zinc finger protein 331                                               | Upregulated |
| A_23_P626 | 0.001171 | 0.000113  | 1.83 | PPT1           | palmitoyl-protein thioesterase 1                                      | Upregulated |
| A_24_P217 | 0.001203 | 0.000119  | 1.83 | MFAP3          | microfibrillar-associated protein 3                                   | Upregulated |
| A_22_P000 | 0.001266 | 0.000133  | 1.83 | TSPAN33        | tetraspanin 33                                                        | Upregulated |
| A_23_P144 | 0.001289 | 0.000136  | 1.83 | EXOC5          | exocyst complex component 5                                           | Upregulated |
| A_23_P164 | 0.001476 | 0.000175  | 1.83 | ZNF225         | zinc finger protein 225                                               | Upregulated |
| A_23_P130 | 0.001772 | 0.000242  | 1.83 | TBC1D17        | TBC1 domain family, member 17                                         | Upregulated |
| A_21_P001 | 0.002128 | 0.000336  | 1.83 | XLOC_I2_005179 |                                                                       | Upregulated |
| A_33_P341 | 0.002579 | 0.000452  | 1.83 | KLF1           | Kruppel-like factor 1 (erythroid)                                     | Upregulated |
| A_23_P520 | 0.011238 | 0.00371   | 1.83 | TARBP1         | TAR (HIV-1) RNA binding protein 1                                     | Upregulated |
| A_23_P256 | 0.021599 | 0.00854   | 1.83 | KBTBD7         | kelch repeat and BTB (POZ) domain containing 7                        | Upregulated |
| A_23_P165 | 0.000828 | 0.0000517 | 1.82 | SLC20A1        | solute carrier family 20 (phosphate transporter), member 1            | Upregulated |
| A_22_P000 | 0.000857 | 0.0000558 | 1.82 | LOC1019277     | uncharacterized LOC101927735                                          | Upregulated |
| A_23_P873 | 0.000859 | 0.0000562 | 1.82 | NAT10          | N-acetyltransferase 10 (GCN5-related)                                 | Upregulated |
| A_33_P342 | 0.000959 | 0.0000713 | 1.82 | PPP1R3D        | protein phosphatase 1, regulatory subunit 3D                          | Upregulated |
| A_33_P340 | 0.001267 | 0.000133  | 1.82 | TRAK1          | trafficking protein, kinesin binding 1                                | Upregulated |
| A_33_P331 | 0.001668 | 0.000217  | 1.82 | PGAP1          | post-GPI attachment to proteins 1                                     | Upregulated |
| A_32_P107 | 0.004084 | 0.000898  | 1.82 | SPATA33        | spermatogenesis associated 33                                         | Upregulated |
| A_22_P000 | 0.010272 | 0.00331   | 1.82 | LOC1019278     | uncharacterized LOC101927835                                          | Upregulated |
| A_21_P001 | 0.000853 | 0.0000549 | 1.81 | DBNDD2         | dysbindin (dystrobrevin binding protein 1) domain containing 2        | Upregulated |
| A_24_P407 | 0.000942 | 0.0000685 | 1.81 | PPM1A          | protein phosphatase, Mg <sup>2+</sup> /Mn <sup>2+</sup> dependent, 1A | Upregulated |
| A_23_P110 | 0.000995 | 0.0000792 | 1.81 | PPWD1          | peptidylprolyl isomerase domain and WD repeat containing 1            | Upregulated |
| A_23_P259 | 0.001062 | 0.0000909 | 1.81 | SEC22A         | SEC22 vesicle trafficking protein homolog A (S. cerevisiae)           | Upregulated |
| A_22_P000 | 0.001087 | 0.0000965 | 1.81 | lnc-KCNC2-1    | lnc-KCNC2-1:1                                                         | Upregulated |
| A_33_P336 | 0.001107 | 0.000101  | 1.81 | ERLIN2         | ER lipid raft associated 2                                            | Upregulated |
| A_22_P000 | 0.00165  | 0.000213  | 1.81 | lnc-PHYHIP-2   | lnc-PHYHIP-2:1                                                        | Upregulated |
| A_23_P106 | 0.004433 | 0.00102   | 1.81 | L2HGDH         | L-2-hydroxyglutarate dehydrogenase                                    | Upregulated |
| A_23_P101 | 0.019256 | 0.00742   | 1.81 | SLC5A5         | solute carrier family 5 (sodium/iodide cotransporter), member 5       | Upregulated |
| A_23_P147 | 0.000819 | 0.0000506 | 1.8  | LYN            | LYN proto-oncogene, Src family tyrosine kinase                        | Upregulated |
| A_21_P000 | 0.000837 | 0.0000527 | 1.8  | RPL32          | ribosomal protein L32                                                 | Upregulated |
| A_33_P325 | 0.000998 | 0.0000795 | 1.8  | C12orf5        | chromosome 12 open reading frame 5                                    | Upregulated |
| A_23_P656 | 0.001235 | 0.000125  | 1.8  | WARS           | tryptophanyl-tRNA synthetase                                          | Upregulated |

|           |          |           |      |                |                                                                |             |
|-----------|----------|-----------|------|----------------|----------------------------------------------------------------|-------------|
| A_33_P326 | 0.001254 | 0.00013   | 1.8  | SLC17A5        | solute carrier family 17 (acidic sugar transporter), member 5  | Upregulated |
| A_22_P000 | 0.001563 | 0.000194  | 1.8  | LOC1019272     | uncharacterized LOC101927287                                   | Upregulated |
| A_32_P194 | 0.002078 | 0.000322  | 1.8  | CLEC16A        | C-type lectin domain family 16, member A                       | Upregulated |
| A_23_P358 | 0.003716 | 0.000785  | 1.8  | DNAJC16        | DnaJ (Hsp40) homolog, subfamily C, member 16                   | Upregulated |
| A_23_P122 | 0.000817 | 0.0000503 | 1.79 | AUTS2          | autism susceptibility candidate 2                              | Upregulated |
| A_33_P335 | 0.000858 | 0.000056  | 1.79 | IDH3B          | isocitrate dehydrogenase 3 (NAD+) beta                         | Upregulated |
| A_32_P108 | 0.000904 | 0.0000618 | 1.79 | AK4            | adenylate kinase 4                                             | Upregulated |
| A_23_P401 | 0.001021 | 0.0000833 | 1.79 | CENPF          | centromere protein F, 350/400kDa                               | Upregulated |
| A_32_P838 | 0.001262 | 0.000132  | 1.79 | HEY1           | hes-related family bHLH transcription factor with YRPW motif 1 | Upregulated |
| A_33_P337 | 0.001813 | 0.000253  | 1.79 | PAAF1          | proteasomal ATPase-associated factor 1                         | Upregulated |
| A_33_P325 | 0.002293 | 0.000377  | 1.79 | ACAT1          | acetyl-CoA acetyltransferase 1                                 | Upregulated |
| A_23_P201 | 0.00246  | 0.000418  | 1.79 | PPOX           | protoporphyrinogen oxidase                                     | Upregulated |
| A_33_P336 | 0.004087 | 0.000899  | 1.79 | HIST1H2AI      | histone cluster 1, H2ai                                        | Upregulated |
| A_23_P425 | 0.006045 | 0.0016    | 1.79 | PPIL4          | peptidylprolyl isomerase (cyclophilin)-like 4                  | Upregulated |
| A_22_P000 | 0.008304 | 0.00249   | 1.79 | lnc-SGSH-1     | lnc-SGSH-1:1                                                   | Upregulated |
| A_22_P000 | 0.009711 | 0.00307   | 1.79 | lnc-DGAT2-1    | lnc-DGAT2-1:1                                                  | Upregulated |
| A_21_P001 | 0.010554 | 0.00342   | 1.79 | XLOC_I2_004563 |                                                                | Upregulated |
| A_21_P001 | 0.012623 | 0.00432   | 1.79 | LOC1027246     | uncharacterized LOC102724630                                   | Upregulated |
| A_23_P361 | 0.016054 | 0.00591   | 1.79 | RIMKLB         | ribosomal modification protein rimK-like family member B       | Upregulated |
| A_33_P332 | 0.025028 | 0.0103    | 1.79 | ETV3           | ets variant 3                                                  | Upregulated |
| A_21_P000 | 0.000858 | 0.000056  | 1.78 | SNORD72        | small nucleolar RNA, C/D box 72                                | Upregulated |
| A_33_P322 | 0.001067 | 0.0000927 | 1.78 | IL17RA         | interleukin 17 receptor A                                      | Upregulated |
| A_32_P170 | 0.001198 | 0.000118  | 1.78 | STAG3          | stromal antigen 3                                              | Upregulated |
| A_24_P302 | 0.001523 | 0.000185  | 1.78 | CLCN6          | chloride channel, voltage-sensitive 6                          | Upregulated |
| A_24_P376 | 0.001753 | 0.000237  | 1.78 | UBA2           | ubiquitin-like modifier activating enzyme 2                    | Upregulated |
| A_21_P001 | 0.001903 | 0.000274  | 1.78 | XLOC_I2_005438 |                                                                | Upregulated |
| A_23_P651 | 0.002125 | 0.000336  | 1.78 | SPRYD3         | SPRY domain containing 3                                       | Upregulated |
| A_21_P000 | 0.002889 | 0.000536  | 1.78 | PCNA-AS1       | PCNA antisense RNA 1                                           | Upregulated |
| A_23_P233 | 0.005917 | 0.00155   | 1.78 | EXO1           | exonuclease 1                                                  | Upregulated |
| A_21_P000 | 0.006908 | 0.00193   | 1.78 | lnc-IL6-1      | lnc-IL6-1:1                                                    | Upregulated |
| A_21_P000 | 0.006908 | 0.00193   | 1.78 | lnc-SLITRK6-   | lnc-SLITRK6-12:2                                               | Upregulated |
| A_22_P000 | 0.007111 | 0.00202   | 1.78 | lnc-RP11-791   | lnc-RP11-791J7.2.1-1:1                                         | Upregulated |
| A_23_P148 | 0.019866 | 0.00771   | 1.78 | NELFB          | negative elongation factor complex member B                    | Upregulated |
| A_24_P491 | 0.026617 | 0.0111    | 1.78 | EXD3           | exonuclease 3'-5' domain containing 3                          | Upregulated |
| A_21_P000 | 0.045304 | 0.0213    | 1.78 | lnc-ZNF727-2   | lnc-ZNF727-2:1                                                 | Upregulated |
| A_33_P329 | 0.000866 | 0.0000571 | 1.77 | RAB2B          | RAB2B, member RAS oncogene family                              | Upregulated |
| A_33_P338 | 0.000995 | 0.0000786 | 1.77 | ZNF331         | zinc finger protein 331                                        | Upregulated |

|           |          |           |      |               |                                                                                  |             |
|-----------|----------|-----------|------|---------------|----------------------------------------------------------------------------------|-------------|
| A_21_P001 | 0.00106  | 0.0000904 | 1.77 | CTHF8         | CTF8, chromosome transmission fidelity factor 8 homolog ( <i>S. cerevisiae</i> ) | Upregulated |
| A_23_P209 | 0.001133 | 0.000106  | 1.77 | NAB1          | NGFI-A binding protein 1 (EGR1 binding protein 1)                                | Upregulated |
| A_23_P380 | 0.001347 | 0.000147  | 1.77 | KIAA1279      | KIAA1279                                                                         | Upregulated |
| A_23_P790 | 0.001745 | 0.000235  | 1.77 | LILRA3        | leukocyte immunoglobulin-like receptor, subfamily A (without TM domain)          | Upregulated |
| A_21_P001 | 0.003191 | 0.000627  | 1.77 | HIST1H4H      | histone cluster 1, H4h                                                           | Upregulated |
| A_24_P341 | 0.004269 | 0.000963  | 1.77 | EPG5          | ectopic P-granules autophagy protein 5 homolog ( <i>C. elegans</i> )             | Upregulated |
| A_23_P397 | 0.005117 | 0.00126   | 1.77 | FEZ2          | fasciculation and elongation protein zeta 2 (zygin II)                           | Upregulated |
| A_22_P000 | 0.00628  | 0.00169   | 1.77 | lnc-CNOT1-1   | lnc-CNOT1-1:1                                                                    | Upregulated |
| A_23_P312 | 0.013653 | 0.00477   | 1.77 | ITGAX         | integrin, alpha X (complement component 3 receptor 4 subunit)                    | Upregulated |
| A_32_P191 | 0.013665 | 0.00478   | 1.77 | SETD8         | SET domain containing (lysine methyltransferase) 8                               | Upregulated |
| A_23_P299 | 0.014597 | 0.00523   | 1.77 | IL15          | interleukin 15                                                                   | Upregulated |
| A_24_P414 | 0.015734 | 0.00575   | 1.77 | PLN           | phospholamban                                                                    | Upregulated |
| A_32_P121 | 0.02125  | 0.00837   | 1.77 | IQCF1         | IQ motif containing F1                                                           | Upregulated |
| A_21_P000 | 0.028707 | 0.0122    | 1.77 | TMEM161B-A    | TMEM161B antisense RNA 1                                                         | Upregulated |
| A_21_P001 | 0.037982 | 0.0173    | 1.77 | POLR2J4       | polymerase (RNA) II (DNA directed) polypeptide J4, pseudogene                    | Upregulated |
| A_19_P008 | 0.000858 | 0.000056  | 1.76 | ANKRD33B      | ankyrin repeat domain 33B                                                        | Upregulated |
| A_23_P252 | 0.000998 | 0.0000797 | 1.76 | SLC2A8        | solute carrier family 2 (facilitated glucose transporter), member 8              | Upregulated |
| A_33_P328 | 0.001108 | 0.000101  | 1.76 | LENG8         | leukocyte receptor cluster (LRC) member 8                                        | Upregulated |
| A_33_P788 | 0.00126  | 0.000131  | 1.76 | TSIX          | TSIX transcript, XIST antisense RNA                                              | Upregulated |
| A_23_P381 | 0.001625 | 0.000207  | 1.76 | SP2           | Sp2 transcription factor                                                         | Upregulated |
| A_32_P224 | 0.001692 | 0.000223  | 1.76 | FKBP15        | FK506 binding protein 15, 133kDa                                                 | Upregulated |
| A_22_P000 | 0.002482 | 0.000424  | 1.76 | LOC1019294    | uncharacterized LOC101929441                                                     | Upregulated |
| A_23_P101 | 0.002851 | 0.000525  | 1.76 | MRPL54        | mitochondrial ribosomal protein L54                                              | Upregulated |
| A_33_P322 | 0.002945 | 0.000551  | 1.76 | LOC1001289    | uncharacterized LOC100128908                                                     | Upregulated |
| A_23_P550 | 0.003472 | 0.000709  | 1.76 | NOL11         | nucleolar protein 11                                                             | Upregulated |
| A_33_P321 | 0.004478 | 0.00103   | 1.76 | ABHD15        | abhydrolase domain containing 15                                                 | Upregulated |
| A_23_P138 | 0.004962 | 0.0012    | 1.76 | ARHGAP19      | Rho GTPase activating protein 19                                                 | Upregulated |
| A_33_P323 | 0.016195 | 0.00598   | 1.76 | TMEM234       | transmembrane protein 234                                                        | Upregulated |
| A_33_P323 | 0.023572 | 0.00954   | 1.76 | TET3          | tet methylcytosine dioxygenase 3                                                 | Upregulated |
| A_23_P926 | 0.028278 | 0.012     | 1.76 | ANKHD1        | ankyrin repeat and KH domain containing 1                                        | Upregulated |
| A_21_P000 | 0.030051 | 0.0129    | 1.76 | lnc-TERF2IP-1 | lnc-TERF2IP-1:1                                                                  | Upregulated |
| A_33_P337 | 0.032182 | 0.0141    | 1.76 | NOM1          | nucleolar protein with MIF4G domain 1                                            | Upregulated |
| A_21_P000 | 0.060178 | 0.03      | 1.76 | lnc-SORCS1-1  | lnc-SORCS1-1:1                                                                   | Upregulated |
| A_24_P377 | 0.000951 | 0.00007   | 1.75 | HSPA4         | heat shock 70kDa protein 4                                                       | Upregulated |
| A_23_P387 | 0.001021 | 0.0000834 | 1.75 | CASP2         | caspase 2, apoptosis-related cysteine peptidase                                  | Upregulated |
| A_23_P242 | 0.001096 | 0.000098  | 1.75 | IDI2-AS1      | IDI2 antisense RNA 1                                                             | Upregulated |
| A_21_P000 | 0.001161 | 0.000111  | 1.75 | SNORA54       | small nucleolar RNA, H/ACA box 54                                                | Upregulated |

|           |          |           |      |             |                                                                                |             |
|-----------|----------|-----------|------|-------------|--------------------------------------------------------------------------------|-------------|
| A_23_P127 | 0.001187 | 0.000116  | 1.75 | DNAJC1      | DnaJ (Hsp40) homolog, subfamily C, member 1                                    | Upregulated |
| A_33_P323 | 0.001363 | 0.00015   | 1.75 | ZSWIM4      | zinc finger, SWIM-type containing 4                                            | Upregulated |
| A_23_P112 | 0.001387 | 0.000155  | 1.75 | RMI1        | RecQ mediated genome instability 1                                             | Upregulated |
| A_33_P336 | 0.001394 | 0.000157  | 1.75 | RTN3        | reticulon 3                                                                    | Upregulated |
| A_23_P160 | 0.001697 | 0.000225  | 1.75 | SLC2A5      | solute carrier family 2 (facilitated glucose/fructose transporter), member 5   | Upregulated |
| A_21_P000 | 0.002311 | 0.000381  | 1.75 | RNU6ATAC    | RNA, U6atac small nuclear (U12-dependent splicing)                             | Upregulated |
| A_23_P431 | 0.003239 | 0.000641  | 1.75 | KBTBD8      | kelch repeat and BTB (POZ) domain containing 8                                 | Upregulated |
| A_23_P182 | 0.004452 | 0.00103   | 1.75 | NPRL2       | nitrogen permease regulator-like 2 (S. cerevisiae)                             | Upregulated |
| A_22_P000 | 0.004745 | 0.00113   | 1.75 | LOC1019275  | uncharacterized LOC101927543                                                   | Upregulated |
| A_23_P365 | 0.005136 | 0.00126   | 1.75 | CAMTA2      | calmodulin binding transcription activator 2                                   | Upregulated |
| A_23_P159 | 0.005204 | 0.00129   | 1.75 | GPR50       | G protein-coupled receptor 50                                                  | Upregulated |
| A_33_P324 | 0.008227 | 0.00246   | 1.75 | C3orf84     | chromosome 3 open reading frame 84                                             | Upregulated |
| A_22_P000 | 0.019642 | 0.0076    | 1.75 | ALMS1-IT1   | ALMS1 intronic transcript 1 (non-protein coding)                               | Upregulated |
| A_33_P323 | 0.022366 | 0.00892   | 1.75 | BMP1        | bone morphogenetic protein 1                                                   | Upregulated |
| A_23_P259 | 0.033269 | 0.0146    | 1.75 | DNAL1       | dynein, axonemal, light chain 1                                                | Upregulated |
| A_33_P325 | 0.000836 | 0.0000525 | 1.74 | MAPK8       | mitogen-activated protein kinase 8                                             | Upregulated |
| A_33_P329 | 0.00091  | 0.0000632 | 1.74 | LPCAT3      | lysophosphatidylcholine acyltransferase 3                                      | Upregulated |
| A_33_P337 | 0.001043 | 0.0000874 | 1.74 | CCL19       | chemokine (C-C motif) ligand 19                                                | Upregulated |
| A_23_P432 | 0.001067 | 0.0000926 | 1.74 | SLC25A40    | solute carrier family 25, member 40                                            | Upregulated |
| A_32_P514 | 0.001101 | 0.0000996 | 1.74 | UNK         | unkempt family zinc finger                                                     | Upregulated |
| A_33_P331 | 0.00144  | 0.000167  | 1.74 | TREM1       | triggering receptor expressed on myeloid cells 1                               | Upregulated |
| A_22_P000 | 0.001663 | 0.000216  | 1.74 | lnc-SGTB-2  | lnc-SGTB-2:1                                                                   | Upregulated |
| A_33_P361 | 0.002709 | 0.000486  | 1.74 | PRKXP1      | protein kinase, X-linked, pseudogene 1                                         | Upregulated |
| A_23_P126 | 0.00275  | 0.000497  | 1.74 | IL10        | interleukin 10                                                                 | Upregulated |
| A_23_P101 | 0.003476 | 0.00071   | 1.74 | LPAR2       | lysophosphatidic acid receptor 2                                               | Upregulated |
| A_23_P657 | 0.00382  | 0.000817  | 1.74 | DIS3L       | DIS3 like exosome 3'-5' exoribonuclease                                        | Upregulated |
| A_33_P324 | 0.00393  | 0.000851  | 1.74 | HAAO        | 3-hydroxyanthranilate 3,4-dioxygenase                                          | Upregulated |
| A_23_P206 | 0.005191 | 0.00128   | 1.74 | MYH11       | myosin, heavy chain 11, smooth muscle                                          | Upregulated |
| A_23_P105 | 0.005382 | 0.00136   | 1.74 | ROM1        | retinal outer segment membrane protein 1                                       | Upregulated |
| A_32_P103 | 0.000954 | 0.0000705 | 1.73 | FAM60A      | family with sequence similarity 60, member A                                   | Upregulated |
| A_23_P203 | 0.00097  | 0.0000739 | 1.73 | SMPD1       | sphingomyelin phosphodiesterase 1, acid lysosomal                              | Upregulated |
| A_33_P323 | 0.000971 | 0.0000743 | 1.73 | PREP        | prolyl endopeptidase                                                           | Upregulated |
| A_23_P118 | 0.001014 | 0.0000821 | 1.73 | TOP2A       | topoisomerase (DNA) II alpha 170kDa                                            | Upregulated |
| A_23_P338 | 0.001068 | 0.0000931 | 1.73 | CD274       | CD274 molecule                                                                 | Upregulated |
| A_24_P115 | 0.001124 | 0.000104  | 1.73 | BIRC2       | baculoviral IAP repeat containing 2                                            | Upregulated |
| A_22_P000 | 0.001476 | 0.000175  | 1.73 | lnc-TNFRSF1 | lnc-TNFRSF17-1:1                                                               | Upregulated |
| A_33_P333 | 0.001635 | 0.00021   | 1.73 | TRPC2       | transient receptor potential cation channel, subfamily C, member 2, pseudogene | Upregulated |



|           |          |           |      |                |                                                                         |             |
|-----------|----------|-----------|------|----------------|-------------------------------------------------------------------------|-------------|
| A_23_P258 | 0.001727 | 0.000232  | 1.73 | MYL5           | myosin, light chain 5, regulatory                                       | Upregulated |
| A_23_P355 | 0.002219 | 0.000358  | 1.73 | SYNPO2L        | synaptopodin 2-like                                                     | Upregulated |
| A_33_P322 | 0.002957 | 0.000555  | 1.73 | LRRC37A8P      | leucine rich repeat containing 37, member A8, pseudogene                | Upregulated |
| A_22_P000 | 0.00419  | 0.000934  | 1.73 | PPIEL          | peptidylprolyl isomerase E-like pseudogene                              | Upregulated |
| A_33_P326 | 0.00451  | 0.00105   | 1.73 | OR2T34         | olfactory receptor, family 2, subfamily T, member 34                    | Upregulated |
| A_33_P339 | 0.004595 | 0.00107   | 1.73 | C15orf54       | chromosome 15 open reading frame 54                                     | Upregulated |
| A_23_P108 | 0.006203 | 0.00166   | 1.73 | WDSUB1         | WD repeat, sterile alpha motif and U-box domain containing 1            | Upregulated |
| A_24_P192 | 0.007499 | 0.00217   | 1.73 | WRNIP1         | Werner helicase interacting protein 1                                   | Upregulated |
| A_33_P334 | 0.022388 | 0.00893   | 1.73 | RPS6KA2        | ribosomal protein S6 kinase, 90kDa, polypeptide 2                       | Upregulated |
| A_22_P000 | 0.059603 | 0.0296    | 1.73 | lnc-MYCT1-1    | lnc-MYCT1-1:1                                                           | Upregulated |
| A_32_P215 | 0.000963 | 0.0000726 | 1.72 | GPSM1          | G-protein signaling modulator 1                                         | Upregulated |
| A_33_P335 | 0.000963 | 0.0000726 | 1.72 | LINC00992      | long intergenic non-protein coding RNA 992                              | Upregulated |
| A_33_P334 | 0.001022 | 0.0000836 | 1.72 | EEF2K          | eukaryotic elongation factor 2 kinase                                   | Upregulated |
| A_33_P338 | 0.001116 | 0.000102  | 1.72 | CD274          | CD274 molecule                                                          | Upregulated |
| A_33_P323 | 0.00124  | 0.000127  | 1.72 | SRSF6          | serine/arginine-rich splicing factor 6                                  | Upregulated |
| A_23_P224 | 0.001453 | 0.00017   | 1.72 | RP2            | retinitis pigmentosa 2 (X-linked recessive)                             | Upregulated |
| A_23_P161 | 0.00161  | 0.000204  | 1.72 | NAALAD2        | N-acetylated alpha-linked acidic dipeptidase 2                          | Upregulated |
| A_23_P321 | 0.001687 | 0.000221  | 1.72 | DENND5A        | DENN/MADD domain containing 5A                                          | Upregulated |
| A_21_P001 | 0.001688 | 0.000222  | 1.72 | XLOC_I2_007135 |                                                                         | Upregulated |
| A_33_P331 | 0.00174  | 0.000234  | 1.72 | CMPK1          | cytidine monophosphate (UMP-CMP) kinase 1, cytosolic                    | Upregulated |
| A_23_P149 | 0.001986 | 0.000297  | 1.72 | LINC00115      | long intergenic non-protein coding RNA 115                              | Upregulated |
| A_33_P328 | 0.002006 | 0.000302  | 1.72 | ANKRD20A8f     | ankyrin repeat domain 20 family, member A8, pseudogene                  | Upregulated |
| A_21_P000 | 0.003109 | 0.000601  | 1.72 | SNORA18        | small nucleolar RNA, H/ACA box 18                                       | Upregulated |
| A_23_P115 | 0.003134 | 0.000609  | 1.72 | VASH2          | vasohibin 2                                                             | Upregulated |
| A_24_P210 | 0.00321  | 0.000633  | 1.72 | PSMG3          | proteasome (prosome, macropain) assembly chaperone 3                    | Upregulated |
| A_24_P156 | 0.003497 | 0.000716  | 1.72 | EBF1           | early B-cell factor 1                                                   | Upregulated |
| A_23_P131 | 0.004031 | 0.000882  | 1.72 | ZBTB32         | zinc finger and BTB domain containing 32                                | Upregulated |
| A_22_P000 | 0.00761  | 0.00221   | 1.72 | lnc-IL21R-1    | lnc-IL21R-1:1                                                           | Upregulated |
| A_24_P417 | 0.009799 | 0.00311   | 1.72 | FLYWCH2        | FLYWCH family member 2                                                  | Upregulated |
| A_21_P001 | 0.011157 | 0.00368   | 1.72 | XLOC_I2_002281 |                                                                         | Upregulated |
| A_24_P118 | 0.01385  | 0.00487   | 1.72 | ATP5S          | ATP synthase, H+ transporting, mitochondrial Fo complex, subunit s (fac | Upregulated |
| A_33_P339 | 0.014654 | 0.00526   | 1.72 | LOC1001298     | uncharacterized LOC100129884                                            | Upregulated |
| A_33_P324 | 0.04057  | 0.0187    | 1.72 | ZNF365         | zinc finger protein 365                                                 | Upregulated |
| A_33_P323 | 0.000867 | 0.0000573 | 1.71 | IL6ST          | interleukin 6 signal transducer                                         | Upregulated |
| A_33_P322 | 0.000905 | 0.000062  | 1.71 | ATP13A3        | ATPase type 13A3                                                        | Upregulated |
| A_21_P000 | 0.000905 | 0.0000621 | 1.71 | lnc-IRF2-2     | lnc-IRF2-2:3                                                            | Upregulated |
| A_23_P255 | 0.000925 | 0.0000651 | 1.71 | GSN            | gelsolin                                                                | Upregulated |

|           |          |           |      |                |                                                                       |             |
|-----------|----------|-----------|------|----------------|-----------------------------------------------------------------------|-------------|
| A_23_P119 | 0.000959 | 0.0000714 | 1.71 | URI1           | URI1, prefoldin-like chaperone                                        | Upregulated |
| A_23_P850 | 0.000961 | 0.000072  | 1.71 | ZRSR2          | zinc finger (CCCH type), RNA-binding motif and serine/arginine rich 2 | Upregulated |
| A_23_P373 | 0.000995 | 0.0000791 | 1.71 | PUS10          | pseudouridylate synthase 10                                           | Upregulated |
| A_23_P516 | 0.001054 | 0.0000894 | 1.71 | MEF2D          | myocyte enhancer factor 2D                                            | Upregulated |
| A_23_P122 | 0.001203 | 0.000119  | 1.71 | BRI3           | brain protein I3                                                      | Upregulated |
| A_33_P339 | 0.001224 | 0.000124  | 1.71 | ELP5           | elongator acetyltransferase complex subunit 5                         | Upregulated |
| A_23_P233 | 0.001409 | 0.000161  | 1.71 | RRP15          | ribosomal RNA processing 15 homolog (S. cerevisiae)                   | Upregulated |
| A_21_P000 | 0.001481 | 0.000177  | 1.71 | lnc-RP1-239B   | lnc-RP1-239B22.1.1-1:2                                                | Upregulated |
| A_23_P167 | 0.001561 | 0.000193  | 1.71 | RNF145         | ring finger protein 145                                               | Upregulated |
| A_23_P345 | 0.001626 | 0.000208  | 1.71 | GNL2           | guanine nucleotide binding protein-like 2 (nucleolar)                 | Upregulated |
| A_33_P321 | 0.001785 | 0.000245  | 1.71 | CDC6           | cell division cycle 6                                                 | Upregulated |
| A_21_P001 | 0.002498 | 0.000429  | 1.71 | KCTD21-AS1     | KCTD21 antisense RNA 1                                                | Upregulated |
| A_21_P001 | 0.002498 | 0.000429  | 1.71 | XLOC_I2_011048 |                                                                       | Upregulated |
| A_23_P361 | 0.002855 | 0.000526  | 1.71 | GTF2H1         | general transcription factor IIH, polypeptide 1, 62kDa                | Upregulated |
| A_33_P331 | 0.003126 | 0.000606  | 1.71 | TP73-AS1       | TP73 antisense RNA 1                                                  | Upregulated |
| A_22_P000 | 0.006688 | 0.00185   | 1.71 | lnc-DGKH-1     | lnc-DGKH-1:1                                                          | Upregulated |
| A_23_P422 | 0.007029 | 0.00198   | 1.71 | C9orf116       | chromosome 9 open reading frame 116                                   | Upregulated |
| A_33_P341 | 0.012219 | 0.00415   | 1.71 | CBLN3          | cerebellin 3 precursor                                                | Upregulated |
| A_33_P331 | 0.016569 | 0.00616   | 1.71 | HNRNPA0        | heterogeneous nuclear ribonucleoprotein A0                            | Upregulated |
| A_22_P000 | 0.020197 | 0.00786   | 1.71 | lnc-CAMK1G-    | lnc-CAMK1G-1:6                                                        | Upregulated |
| A_19_P008 | 0.033028 | 0.0145    | 1.71 | KTN1-AS1       | KTN1 antisense RNA 1                                                  | Upregulated |
| A_23_P119 | 0.000912 | 0.0000635 | 1.7  | EBI3           | Epstein-Barr virus induced 3                                          | Upregulated |
| A_33_P341 | 0.001062 | 0.0000912 | 1.7  | NRBF2          | nuclear receptor binding factor 2                                     | Upregulated |
| A_23_P746 | 0.001161 | 0.000111  | 1.7  | NUDC           | nudC nuclear distribution protein                                     | Upregulated |
| A_23_P368 | 0.001196 | 0.000118  | 1.7  | NETO2          | neuropilin (NRP) and tolloid (TLL)-like 2                             | Upregulated |
| A_33_P334 | 0.001297 | 0.000138  | 1.7  | MAP4           | microtubule-associated protein 4                                      | Upregulated |
| A_23_P111 | 0.001321 | 0.000142  | 1.7  | MAK16          | MAK16 homolog (S. cerevisiae)                                         | Upregulated |
| A_23_P132 | 0.001477 | 0.000175  | 1.7  | MANF           | mesencephalic astrocyte-derived neurotrophic factor                   | Upregulated |
| A_23_P768 | 0.001877 | 0.000268  | 1.7  | PRMT5          | protein arginine methyltransferase 5                                  | Upregulated |
| A_22_P000 | 0.002491 | 0.000427  | 1.7  | lnc-KLHL25-5   | lnc-KLHL25-5:1                                                        | Upregulated |
| A_32_P133 | 0.00437  | 0.000999  | 1.7  | DCAF10         | DDB1 and CUL4 associated factor 10                                    | Upregulated |
| A_33_P335 | 0.00437  | 0.000999  | 1.7  | ZNF273         | zinc finger protein 273                                               | Upregulated |
| A_23_P423 | 0.004594 | 0.00107   | 1.7  | RXRA           | retinoid X receptor, alpha                                            | Upregulated |
| A_23_P379 | 0.005162 | 0.00127   | 1.7  | FAM63B         | family with sequence similarity 63, member B                          | Upregulated |
| A_33_P323 | 0.005196 | 0.00128   | 1.7  | INPP5F         | inositol polyphosphate-5-phosphatase F                                | Upregulated |
| A_23_P926 | 0.005502 | 0.0014    | 1.7  | DAP            | death-associated protein                                              | Upregulated |
| A_22_P000 | 0.008307 | 0.00249   | 1.7  | lnc-WDR67-2    | lnc-WDR67-2:1                                                         | Upregulated |

|           |          |           |      |              |                                                                                |             |
|-----------|----------|-----------|------|--------------|--------------------------------------------------------------------------------|-------------|
| A_23_P123 | 0.008661 | 0.00264   | 1.7  | PDAP1        | PDGFA associated protein 1                                                     | Upregulated |
| A_23_P216 | 0.008954 | 0.00276   | 1.7  | SLC44A1      | solute carrier family 44 (choline transporter), member 1                       | Upregulated |
| A_32_P711 | 0.009133 | 0.00283   | 1.7  | SCAI         | suppressor of cancer cell invasion                                             | Upregulated |
| A_23_P503 | 0.01333  | 0.00464   | 1.7  | FAM32A       | family with sequence similarity 32, member A                                   | Upregulated |
| A_24_P914 | 0.018847 | 0.00722   | 1.7  | MKLN1        | muskelin 1, intracellular mediator containing kelch motifs                     | Upregulated |
| A_32_P102 | 0.022757 | 0.00911   | 1.7  | LOC541473    | FK506 binding protein 6, 36kDa pseudogene                                      | Upregulated |
| A_24_P340 | 0.027809 | 0.0117    | 1.7  | ZNF621       | zinc finger protein 621                                                        | Upregulated |
| A_23_P438 | 0.042467 | 0.0197    | 1.7  | KRT24        | keratin 24, type I                                                             | Upregulated |
| A_23_P863 | 0.001199 | 0.000119  | 1.69 | IER5         | immediate early response 5                                                     | Upregulated |
| A_23_P812 | 0.001216 | 0.000122  | 1.69 | MRPS18C      | mitochondrial ribosomal protein S18C                                           | Upregulated |
| A_32_P163 | 0.001279 | 0.000135  | 1.69 | SGMS1        | sphingomyelin synthase 1                                                       | Upregulated |
| A_23_P118 | 0.001566 | 0.000195  | 1.69 | GINS2        | GINS complex subunit 2 (Psf2 homolog)                                          | Upregulated |
| A_23_P546 | 0.00176  | 0.000239  | 1.69 | KIF22        | kinesin family member 22                                                       | Upregulated |
| A_33_P333 | 0.003543 | 0.000732  | 1.69 | MSL3         | male-specific lethal 3 homolog (Drosophila)                                    | Upregulated |
| A_23_P213 | 0.00384  | 0.000824  | 1.69 | PPARGC1B     | peroxisome proliferator-activated receptor gamma, coactivator 1 beta           | Upregulated |
| A_23_P103 | 0.005933 | 0.00156   | 1.69 | YY1AP1       | YY1 associated protein 1                                                       | Upregulated |
| A_21_P001 | 0.030178 | 0.013     | 1.69 | CLUHP3       | clustered mitochondria (cluA/CLU1) homolog pseudogene 3                        | Upregulated |
| A_32_P507 | 0.038787 | 0.0177    | 1.69 | PI4KAP2      | phosphatidylinositol 4-kinase, catalytic, alpha pseudogene 2                   | Upregulated |
| A_22_P000 | 0.000905 | 0.0000621 | 1.68 | lnc-CCDC73-1 | lnc-CCDC73-1:1                                                                 | Upregulated |
| A_24_P530 | 0.000947 | 0.0000694 | 1.68 | SPG7         | spastic paraplegia 7 (pure and complicated autosomal recessive)                | Upregulated |
| A_23_P218 | 0.001126 | 0.000105  | 1.68 | CRYZL1       | crystallin, zeta (quinone reductase)-like 1                                    | Upregulated |
| A_24_P328 | 0.001151 | 0.000109  | 1.68 | TRAPPC11     | trafficking protein particle complex 11                                        | Upregulated |
| A_23_P410 | 0.00121  | 0.000121  | 1.68 | GNL3         | guanine nucleotide binding protein-like 3 (nucleolar)                          | Upregulated |
| A_33_P324 | 0.001249 | 0.000129  | 1.68 | DDX19A       | DEAD (Asp-Glu-Ala-Asp) box polypeptide 19A                                     | Upregulated |
| A_23_P252 | 0.002163 | 0.000344  | 1.68 | MRPS26       | mitochondrial ribosomal protein S26                                            | Upregulated |
| A_21_P001 | 0.002221 | 0.000359  | 1.68 | ZNF663P      | zinc finger protein 663, pseudogene                                            | Upregulated |
| A_23_P312 | 0.003448 | 0.000702  | 1.68 | CCDC82       | coiled-coil domain containing 82                                               | Upregulated |
| A_23_P370 | 0.003701 | 0.000779  | 1.68 | MCM4         | minichromosome maintenance complex component 4                                 | Upregulated |
| A_23_P211 | 0.004275 | 0.000965  | 1.68 | OPA1         | optic atrophy 1 (autosomal dominant)                                           | Upregulated |
| A_23_P167 | 0.006568 | 0.0018    | 1.68 | MGAT5        | mannosyl (alpha-1,6-)-glycoprotein beta-1,6-N-acetyl-glucosaminyltransferase 5 | Upregulated |
| A_21_P000 | 0.009091 | 0.00281   | 1.68 | SNORD107     | small nucleolar RNA, C/D box 107                                               | Upregulated |
| A_23_P503 | 0.009108 | 0.00282   | 1.68 | TRIP10       | thyroid hormone receptor interactor 10                                         | Upregulated |
| A_23_P313 | 0.009711 | 0.00307   | 1.68 | LRRN3        | leucine rich repeat neuronal 3                                                 | Upregulated |
| A_23_P204 | 0.012732 | 0.00436   | 1.68 | VEZT         | vezatin, adherens junctions transmembrane protein                              | Upregulated |
| A_24_P819 | 0.013059 | 0.00451   | 1.68 | SLC2A3       | solute carrier family 2 (facilitated glucose transporter), member 3            | Upregulated |
| A_33_P378 | 0.019638 | 0.0076    | 1.68 | SBNO1        | strawberry notch homolog 1 (Drosophila)                                        | Upregulated |
| A_22_P000 | 0.023517 | 0.00951   | 1.68 | lnc-SIAH1-1  | lnc-SIAH1-1:1                                                                  | Upregulated |

|           |          |           |      |             |                                                                     |             |
|-----------|----------|-----------|------|-------------|---------------------------------------------------------------------|-------------|
| A_33_P328 | 0.000908 | 0.0000626 | 1.67 | CTSA        | cathepsin A                                                         | Upregulated |
| A_23_P759 | 0.000954 | 0.0000703 | 1.67 | TRAF6       | TNF receptor-associated factor 6, E3 ubiquitin protein ligase       | Upregulated |
| A_24_P151 | 0.000963 | 0.0000723 | 1.67 | POF1B       | premature ovarian failure, 1B                                       | Upregulated |
| A_23_P914 | 0.000971 | 0.0000741 | 1.67 | PSMA7       | proteasome (prosome, macropain) subunit, alpha type, 7              | Upregulated |
| A_23_P217 | 0.000991 | 0.0000773 | 1.67 | GSTM4       | glutathione S-transferase mu 4                                      | Upregulated |
| A_33_P336 | 0.001133 | 0.000106  | 1.67 | MED31       | mediator complex subunit 31                                         | Upregulated |
| A_21_P001 | 0.001139 | 0.000107  | 1.67 | GOLGA8K     | golgin A8 family, member K                                          | Upregulated |
| A_33_P326 | 0.001226 | 0.000124  | 1.67 | EPG5        | ectopic P-granules autophagy protein 5 homolog (C. elegans)         | Upregulated |
| A_23_P334 | 0.00131  | 0.00014   | 1.67 | LY75        | lymphocyte antigen 75                                               | Upregulated |
| A_23_P170 | 0.001528 | 0.000186  | 1.67 | E2F6        | E2F transcription factor 6                                          | Upregulated |
| A_33_P342 | 0.00192  | 0.000279  | 1.67 | YTHDC2      | YTH domain containing 2                                             | Upregulated |
| A_33_P329 | 0.002442 | 0.000413  | 1.67 | VPS52       | vacuolar protein sorting 52 homolog (S. cerevisiae)                 | Upregulated |
| A_24_P889 | 0.002756 | 0.000499  | 1.67 | XPC         | xeroderma pigmentosum, complementation group C                      | Upregulated |
| A_21_P000 | 0.003094 | 0.000595  | 1.67 | lnc-DNAJC19 | lnc-DNAJC19-2:2                                                     | Upregulated |
| A_33_P332 | 0.003456 | 0.000704  | 1.67 | NTRK2       | neurotrophic tyrosine kinase, receptor, type 2                      | Upregulated |
| A_21_P000 | 0.004864 | 0.00117   | 1.67 | SNORD121A   | small nucleolar RNA, C/D box 121A                                   | Upregulated |
| A_23_P226 | 0.005292 | 0.00132   | 1.67 | ARMCX1      | armadillo repeat containing, X-linked 1                             | Upregulated |
| A_33_P325 | 0.010051 | 0.00322   | 1.67 | GSTA4       | glutathione S-transferase alpha 4                                   | Upregulated |
| A_21_P000 | 0.025056 | 0.0103    | 1.67 | lnc-SCEL-1  | lnc-SCEL-1:1                                                        | Upregulated |
| A_23_P900 | 0.052165 | 0.0252    | 1.67 | GCDH        | glutaryl-CoA dehydrogenase                                          | Upregulated |
| A_33_P326 | 0.001046 | 0.0000877 | 1.66 | CLNK        | cytokine-dependent hematopoietic cell linker                        | Upregulated |
| A_23_P930 | 0.001076 | 0.0000944 | 1.66 | EXOC3       | exocyst complex component 3                                         | Upregulated |
| A_23_P115 | 0.001158 | 0.000111  | 1.66 | EIF2B3      | eukaryotic translation initiation factor 2B, subunit 3 gamma, 58kDa | Upregulated |
| A_23_P141 | 0.001179 | 0.000115  | 1.66 | FAM222B     | family with sequence similarity 222, member B                       | Upregulated |
| A_23_P103 | 0.001226 | 0.000124  | 1.66 | EBNA1BP2    | EBNA1 binding protein 2                                             | Upregulated |
| A_24_P381 | 0.001243 | 0.000128  | 1.66 | GLRX3       | glutaredoxin 3                                                      | Upregulated |
| A_23_P390 | 0.001266 | 0.000133  | 1.66 | NUPL1       | nucleoporin like 1                                                  | Upregulated |
| A_22_P000 | 0.001702 | 0.000227  | 1.66 | lnc-CRIPT-1 | lnc-CRIPT-1:1                                                       | Upregulated |
| A_23_P130 | 0.002187 | 0.000351  | 1.66 | ENO3        | enolase 3 (beta, muscle)                                            | Upregulated |
| A_24_P138 | 0.002246 | 0.000367  | 1.66 | SNX20       | sorting nexin 20                                                    | Upregulated |
| A_23_P737 | 0.00241  | 0.000406  | 1.66 | MED12       | mediator complex subunit 12                                         | Upregulated |
| A_32_P802 | 0.003195 | 0.000629  | 1.66 | DDX6        | DEAD (Asp-Glu-Ala-Asp) box helicase 6                               | Upregulated |
| A_23_P385 | 0.004321 | 0.000981  | 1.66 | STX12       | syntaxin 12                                                         | Upregulated |
| A_19_P003 | 0.005243 | 0.0013    | 1.66 | LOC1005068  | uncharacterized LOC100506860                                        | Upregulated |
| A_23_P138 | 0.0077   | 0.00225   | 1.66 | ACTN3       | actinin, alpha 3 (gene/pseudogene)                                  | Upregulated |
| A_24_P333 | 0.03335  | 0.0147    | 1.66 | KLK13       | kallikrein-related peptidase 13                                     | Upregulated |
| A_23_P380 | 0.033613 | 0.0148    | 1.66 | ARPC4-TTLL  | ARPC4-TTLL3 readthrough                                             | Upregulated |

|           |          |           |      |               |                                                                          |             |
|-----------|----------|-----------|------|---------------|--------------------------------------------------------------------------|-------------|
| A_22_P000 | 0.000939 | 0.000068  | 1.65 | CFLAR-AS1     | CFLAR antisense RNA 1                                                    | Upregulated |
| A_23_P376 | 0.00114  | 0.000108  | 1.65 | FAM21C        | family with sequence similarity 21, member C                             | Upregulated |
| A_32_P175 | 0.001158 | 0.000111  | 1.65 | HK2           | hexokinase 2                                                             | Upregulated |
| A_23_P192 | 0.001551 | 0.000191  | 1.65 | RPF2          | ribosome production factor 2 homolog (S. cerevisiae)                     | Upregulated |
| A_33_P332 | 0.001776 | 0.000243  | 1.65 | INSIG2        | insulin induced gene 2                                                   | Upregulated |
| A_33_P342 | 0.002483 | 0.000425  | 1.65 | CLEC16A       | C-type lectin domain family 16, member A                                 | Upregulated |
| A_23_P948 | 0.00293  | 0.000546  | 1.65 | NUDT9         | nudix (nucleoside diphosphate linked moiety X)-type motif 9              | Upregulated |
| A_22_P000 | 0.003102 | 0.000599  | 1.65 | RCL1          | RNA terminal phosphate cyclase-like 1                                    | Upregulated |
| A_23_P502 | 0.003386 | 0.000683  | 1.65 | SEC22C        | SEC22 vesicle trafficking protein homolog C (S. cerevisiae)              | Upregulated |
| A_33_P325 | 0.004521 | 0.00105   | 1.65 | EDN1          | endothelin 1                                                             | Upregulated |
| A_23_P128 | 0.014348 | 0.0051    | 1.65 | ENOX1         | ecto-NOX disulfide-thiol exchanger 1                                     | Upregulated |
| A_24_P405 | 0.015919 | 0.00584   | 1.65 | TTC33         | tetratricopeptide repeat domain 33                                       | Upregulated |
| A_24_P413 | 0.000949 | 0.0000698 | 1.64 | TP73          | tumor protein p73                                                        | Upregulated |
| A_22_P000 | 0.001066 | 0.0000923 | 1.64 | lnc-C17orf63- | lnc-C17orf63-1:1                                                         | Upregulated |
| A_21_P001 | 0.001158 | 0.000111  | 1.64 | LOC1027246    | uncharacterized LOC102724679                                             | Upregulated |
| A_24_P151 | 0.001171 | 0.000113  | 1.64 | KCNAB2        | potassium channel, voltage gated subfamily A regulatory beta subunit 2   | Upregulated |
| A_23_P629 | 0.001203 | 0.00012   | 1.64 | ATP1B1        | ATPase, Na <sup>+</sup> /K <sup>+</sup> transporting, beta 1 polypeptide | Upregulated |
| A_24_P450 | 0.001437 | 0.000166  | 1.64 | NPEPL1        | aminopeptidase-like 1                                                    | Upregulated |
| A_33_P329 | 0.001454 | 0.000171  | 1.64 | SRRT          | serrate, RNA effector molecule                                           | Upregulated |
| A_23_P481 | 0.001641 | 0.000212  | 1.64 | TMEM106C      | transmembrane protein 106C                                               | Upregulated |
| A_33_P341 | 0.002001 | 0.0003    | 1.64 | SRSF2         | serine/arginine-rich splicing factor 2                                   | Upregulated |
| A_24_P228 | 0.002117 | 0.000332  | 1.64 | MRPL40        | mitochondrial ribosomal protein L40                                      | Upregulated |
| A_24_P294 | 0.003369 | 0.000679  | 1.64 | SERTAD2       | SERTA domain containing 2                                                | Upregulated |
| A_21_P000 | 0.006457 | 0.00176   | 1.64 | lnc-RNPC3-3   | lnc-RNPC3-3:1                                                            | Upregulated |
| A_33_P341 | 0.011556 | 0.00386   | 1.64 | GAS2L1        | growth arrest-specific 2 like 1                                          | Upregulated |
| A_23_P323 | 0.013308 | 0.00462   | 1.64 | SLC5A12       | solute carrier family 5 (sodium/monocarboxylate cotransporter), member   | Upregulated |
| A_33_P337 | 0.031596 | 0.0137    | 1.64 | TC2N          | tandem C2 domains, nuclear                                               | Upregulated |
| A_33_P333 | 0.000995 | 0.0000786 | 1.63 | RNPC3         | RNA-binding region (RNP1, RRM) containing 3                              | Upregulated |
| A_23_P818 | 0.001029 | 0.0000847 | 1.63 | UBD           | ubiquitin D                                                              | Upregulated |
| A_23_P127 | 0.001193 | 0.000117  | 1.63 | TNNT3         | troponin T type 3 (skeletal, fast)                                       | Upregulated |
| A_33_P339 | 0.001553 | 0.000192  | 1.63 | USE1          | unconventional SNARE in the ER 1 homolog (S. cerevisiae)                 | Upregulated |
| A_24_P140 | 0.002199 | 0.000354  | 1.63 | SORBS2        | sorbin and SH3 domain containing 2                                       | Upregulated |
| A_23_P120 | 0.002357 | 0.000392  | 1.63 | TTC3          | tetratricopeptide repeat domain 3                                        | Upregulated |
| A_23_P947 | 0.002549 | 0.000442  | 1.63 | TOR1B         | torsin family 1, member B (torsin B)                                     | Upregulated |
| A_23_P904 | 0.003737 | 0.000792  | 1.63 | LILRA4        | leukocyte immunoglobulin-like receptor, subfamily A (with TM domain), nr | Upregulated |
| A_22_P000 | 0.003957 | 0.00086   | 1.63 | lnc-HSPB8-2   | lnc-HSPB8-2:1                                                            | Upregulated |
| A_24_P272 | 0.004251 | 0.000957  | 1.63 | DENND1A       | DENN/MADD domain containing 1A                                           | Upregulated |

|           |          |           |      |              |                                                                         |             |
|-----------|----------|-----------|------|--------------|-------------------------------------------------------------------------|-------------|
| A_21_P000 | 0.007789 | 0.00228   | 1.63 | lnc-EFNB2-2  | lnc-EFNB2-2:1                                                           | Upregulated |
| A_22_P000 | 0.013918 | 0.0049    | 1.63 | lnc-NLRP12-1 | lnc-NLRP12-1:1                                                          | Upregulated |
| A_21_P000 | 0.016327 | 0.00605   | 1.63 | lnc-TSN-8    | lnc-TSN-8:1                                                             | Upregulated |
| A_22_P000 | 0.027475 | 0.0116    | 1.63 | lnc-TBC1D12  | lnc-TBC1D12-1:1                                                         | Upregulated |
| A_23_P953 | 0.033245 | 0.0146    | 1.63 | RFC5         | replication factor C (activator 1) 5, 36.5kDa                           | Upregulated |
| A_33_P342 | 0.059256 | 0.0294    | 1.63 | PALLD        | palladin, cytoskeletal associated protein                               | Upregulated |
| A_23_P100 | 0.000966 | 0.0000734 | 1.62 | SUZ12        | SUZ12 polycomb repressive complex 2 subunit                             | Upregulated |
| A_32_P545 | 0.000995 | 0.0000781 | 1.62 | CCT6A        | chaperonin containing TCP1, subunit 6A (zeta 1)                         | Upregulated |
| A_23_P924 | 0.001062 | 0.0000909 | 1.62 | UTP3         | UTP3, small subunit (SSU) processome component, homolog (S. cerevisiae) | Upregulated |
| A_24_P438 | 0.00112  | 0.000103  | 1.62 | C9orf40      | chromosome 9 open reading frame 40                                      | Upregulated |
| A_33_P340 | 0.001163 | 0.000112  | 1.62 | TMF1         | TATA element modulatory factor 1                                        | Upregulated |
| A_23_P178 | 0.001697 | 0.000225  | 1.62 | CD82         | CD82 molecule                                                           | Upregulated |
| A_21_P000 | 0.001954 | 0.000288  | 1.62 | LINC01005    | long intergenic non-protein coding RNA 1005                             | Upregulated |
| A_32_P215 | 0.002124 | 0.000334  | 1.62 | NPIPA1       | nuclear pore complex interacting protein family, member A1              | Upregulated |
| A_32_P144 | 0.002357 | 0.000392  | 1.62 | NECAP1       | NECAP endocytosis associated 1                                          | Upregulated |
| A_23_P132 | 0.00308  | 0.000591  | 1.62 | USP18        | ubiquitin specific peptidase 18                                         | Upregulated |
| A_32_P225 | 0.005121 | 0.00126   | 1.62 | EIF3J-AS1    | EIF3J antisense RNA 1 (head to head)                                    | Upregulated |
| A_33_P341 | 0.006428 | 0.00175   | 1.62 | SERPING1     | serpin peptidase inhibitor, clade G (C1 inhibitor), member 1            | Upregulated |
| A_24_P177 | 0.008783 | 0.00269   | 1.62 | GEN1         | GEN1 Holliday junction 5' flap endonuclease                             | Upregulated |
| A_23_P200 | 0.010812 | 0.00353   | 1.62 | CEP85        | centrosomal protein 85kDa                                               | Upregulated |
| A_23_P843 | 0.000959 | 0.0000711 | 1.61 | COPS6        | COP9 signalosome subunit 6                                              | Upregulated |
| A_24_P343 | 0.000995 | 0.000079  | 1.61 | ATP5J2       | ATP synthase, H+ transporting, mitochondrial Fo complex, subunit F2     | Upregulated |
| A_23_P110 | 0.001062 | 0.0000911 | 1.61 | CHIC2        | cysteine-rich hydrophobic domain 2                                      | Upregulated |
| A_24_P137 | 0.001068 | 0.000093  | 1.61 | ZNF34        | zinc finger protein 34                                                  | Upregulated |
| A_23_P880 | 0.001068 | 0.0000932 | 1.61 | TBC1D4       | TBC1 domain family, member 4                                            | Upregulated |
| A_32_P171 | 0.001075 | 0.0000942 | 1.61 | NBPF10       | neuroblastoma breakpoint family, member 10                              | Upregulated |
| A_23_P315 | 0.001087 | 0.0000963 | 1.61 | KIAA0930     | KIAA0930                                                                | Upregulated |
| A_23_P350 | 0.001098 | 0.0000985 | 1.61 | REEP5        | receptor accessory protein 5                                            | Upregulated |
| A_23_P133 | 0.001121 | 0.000104  | 1.61 | HARS         | histidyl-tRNA synthetase                                                | Upregulated |
| A_23_P930 | 0.001124 | 0.000104  | 1.61 | NUS1         | nuclear undecaprenyl pyrophosphate synthase 1 homolog (S. cerevisiae)   | Upregulated |
| A_21_P001 | 0.001222 | 0.000123  | 1.61 | lnc-TAF9-2   | lnc-TAF9-2:1                                                            | Upregulated |
| A_33_P322 | 0.00124  | 0.000126  | 1.61 | DOK3         | docking protein 3                                                       | Upregulated |
| A_23_P103 | 0.001235 | 0.000126  | 1.61 | KTI12        | KTI12 homolog, chromatin associated (S. cerevisiae)                     | Upregulated |
| A_23_P395 | 0.001356 | 0.000149  | 1.61 | UBE2F        | ubiquitin-conjugating enzyme E2F (putative)                             | Upregulated |
| A_33_P334 | 0.001824 | 0.000255  | 1.61 | LOC1001313   | uncharacterized LOC100131373                                            | Upregulated |
| A_23_P140 | 0.002078 | 0.000322  | 1.61 | CYFIP1       | cytoplasmic FMR1 interacting protein 1                                  | Upregulated |
| A_33_P332 | 0.002618 | 0.000461  | 1.61 | FUBP3        | far upstream element (FUSE) binding protein 3                           | Upregulated |

|           |          |           |      |                |                                                                           |             |
|-----------|----------|-----------|------|----------------|---------------------------------------------------------------------------|-------------|
| A_23_P383 | 0.003651 | 0.000764  | 1.61 | NFKBID         | nuclear factor of kappa light polypeptide gene enhancer in B-cells inhibi | Upregulated |
| A_23_P152 | 0.004508 | 0.00104   | 1.61 | SLC6A4         | solute carrier family 6 (neurotransmitter transporter), member 4          | Upregulated |
| A_24_P201 | 0.008442 | 0.00255   | 1.61 | PPP1R3B        | protein phosphatase 1, regulatory subunit 3B                              | Upregulated |
| A_33_P332 | 0.01123  | 0.00371   | 1.61 | lnc-PAX9-2     | lnc-PAX9-2:1                                                              | Upregulated |
| A_23_P429 | 0.021351 | 0.00842   | 1.61 | ZNF232         | zinc finger protein 232                                                   | Upregulated |
| A_21_P001 | 0.066164 | 0.0335    | 1.61 | BMS1P20        | BMS1 pseudogene 20                                                        | Upregulated |
| A_23_P145 | 0.000995 | 0.0000778 | 1.6  | MED23          | mediator complex subunit 23                                               | Upregulated |
| A_23_P458 | 0.000995 | 0.0000791 | 1.6  | CHD1L          | chromodomain helicase DNA binding protein 1-like                          | Upregulated |
| A_21_P001 | 0.001029 | 0.000085  | 1.6  | XLOC_I2_010013 |                                                                           | Upregulated |
| A_22_P000 | 0.001065 | 0.0000919 | 1.6  | lnc-SRGAP3-    | lnc-SRGAP3-1:21                                                           | Upregulated |
| A_22_P000 | 0.001133 | 0.000106  | 1.6  | lnc-CTBP2-1    | lnc-CTBP2-1:1                                                             | Upregulated |
| A_23_P129 | 0.001173 | 0.000113  | 1.6  | GOLGA2P7       | golgin A2 pseudogene 7                                                    | Upregulated |
| A_33_P331 | 0.001215 | 0.000122  | 1.6  | ZNRF2          | zinc and ring finger 2, E3 ubiquitin protein ligase                       | Upregulated |
| A_24_P345 | 0.001949 | 0.000286  | 1.6  | XRCC5          | X-ray repair complementing defective repair in Chinese hamster cells 5 (  | Upregulated |
| A_23_P277 | 0.001967 | 0.000292  | 1.6  | FBXO46         | F-box protein 46                                                          | Upregulated |
| A_24_P521 | 0.003176 | 0.000622  | 1.6  | KLHL24         | kelch-like family member 24                                               | Upregulated |
| A_23_P725 | 0.004084 | 0.000898  | 1.6  | KLHL2          | kelch-like family member 2                                                | Upregulated |
| A_33_P330 | 0.0044   | 0.00101   | 1.6  | GPX4           | glutathione peroxidase 4                                                  | Upregulated |
| A_23_P371 | 0.004588 | 0.00107   | 1.6  | DTD2           | D-tyrosyl-tRNA deacylase 2 (putative)                                     | Upregulated |
| A_23_P160 | 0.006067 | 0.00161   | 1.6  | PPAN           | peter pan homolog (Drosophila)                                            | Upregulated |
| A_21_P000 | 0.006553 | 0.0018    | 1.6  | LINC00882      | long intergenic non-protein coding RNA 882                                | Upregulated |
| A_23_P693 | 0.009096 | 0.00282   | 1.6  | HYAL1          | hyaluronoglucosaminidase 1                                                | Upregulated |
| A_24_P235 | 0.012945 | 0.00446   | 1.6  | MTHFD1L        | methylenetetrahydrofolate dehydrogenase (NADP+ dependent) 1-like          | Upregulated |
| A_22_P000 | 0.014197 | 0.00503   | 1.6  | lnc-TREX1-2    | lnc-TREX1-2:1                                                             | Upregulated |
| A_33_P335 | 0.017622 | 0.00665   | 1.6  | DUSP8          | dual specificity phosphatase 8                                            | Upregulated |
| A_21_P001 | 0.000979 | 0.0000756 | 1.59 | XLOC_I2_015478 |                                                                           | Upregulated |
| A_24_P351 | 0.000995 | 0.0000782 | 1.59 | IMMT           | inner membrane protein, mitochondrial                                     | Upregulated |
| A_23_P369 | 0.001062 | 0.0000908 | 1.59 | FAM98C         | family with sequence similarity 98, member C                              | Upregulated |
| A_24_P137 | 0.001066 | 0.0000924 | 1.59 | IFRD1          | interferon-related developmental regulator 1                              | Upregulated |
| A_23_P211 | 0.001087 | 0.0000964 | 1.59 | NUP50          | nucleoporin 50kDa                                                         | Upregulated |
| A_23_P885 | 0.001219 | 0.000123  | 1.59 | ARID3B         | AT rich interactive domain 3B (BRIGHT-like)                               | Upregulated |
| A_32_P273 | 0.001341 | 0.000146  | 1.59 | TCTN3          | tectonic family member 3                                                  | Upregulated |
| A_23_P124 | 0.001393 | 0.000156  | 1.59 | CHKA           | choline kinase alpha                                                      | Upregulated |
| A_33_P323 | 0.001985 | 0.000296  | 1.59 | F11R           | F11 receptor                                                              | Upregulated |
| A_23_P588 | 0.002046 | 0.000314  | 1.59 | GSTM2P1        | glutathione S-transferase mu 2 (muscle) pseudogene 1                      | Upregulated |
| A_24_P144 | 0.002232 | 0.000362  | 1.59 | DHRS4-AS1      | DHRS4 antisense RNA 1                                                     | Upregulated |
| A_21_P000 | 0.002528 | 0.000437  | 1.59 | lnc-PRKCQ-2    | lnc-PRKCQ-2:1                                                             | Upregulated |

|           |          |           |      |                |                                                                        |             |
|-----------|----------|-----------|------|----------------|------------------------------------------------------------------------|-------------|
| A_33_P335 | 0.003543 | 0.000732  | 1.59 | POGZ           | pogo transposable element with ZNF domain                              | Upregulated |
| A_33_P326 | 0.005964 | 0.00157   | 1.59 | MPDU1          | mannose-P-dolichol utilization defect 1                                | Upregulated |
| A_23_P105 | 0.009292 | 0.0029    | 1.59 | TMEM116        | transmembrane protein 116                                              | Upregulated |
| A_21_P000 | 0.014899 | 0.00537   | 1.59 | LOC1019293     | uncharacterized LOC101929382                                           | Upregulated |
| A_22_P000 | 0.017875 | 0.00676   | 1.59 | lnc-PPM1D-1    | lnc-PPM1D-1:1                                                          | Upregulated |
| A_24_P210 | 0.019849 | 0.0077    | 1.59 | NME4           | NME/NM23 nucleoside diphosphate kinase 4                               | Upregulated |
| A_33_P329 | 0.023681 | 0.00959   | 1.59 | TCOF1          | Treacher Collins-Franceschetti syndrome 1                              | Upregulated |
| A_23_P116 | 0.02952  | 0.0127    | 1.59 | ATG101         | autophagy related 101                                                  | Upregulated |
| A_33_P331 | 0.040833 | 0.0188    | 1.59 | AP2A2          | adaptor-related protein complex 2, alpha 2 subunit                     | Upregulated |
| A_23_P469 | 0.000995 | 0.0000779 | 1.58 | HIF1AN         | hypoxia inducible factor 1, alpha subunit inhibitor                    | Upregulated |
| A_21_P000 | 0.001004 | 0.0000805 | 1.58 | LINC01128      | long intergenic non-protein coding RNA 1128                            | Upregulated |
| A_33_P337 | 0.001007 | 0.0000812 | 1.58 | MFAP3          | microfibrillar-associated protein 3                                    | Upregulated |
| A_24_P349 | 0.001046 | 0.0000879 | 1.58 | POM121         | POM121 transmembrane nucleoporin                                       | Upregulated |
| A_23_P560 | 0.001361 | 0.00015   | 1.58 | DOK1           | docking protein 1, 62kDa (downstream of tyrosine kinase 1)             | Upregulated |
| A_33_P322 | 0.00161  | 0.000204  | 1.58 | HIST1H2BF      | histone cluster 1, H2bf                                                | Upregulated |
| A_33_P340 | 0.001854 | 0.000263  | 1.58 | YWHAE          | tyrosine 3-monooxygenase/tryptophan 5-monooxygenase activation prc     | Upregulated |
| A_19_P008 | 0.001859 | 0.000264  | 1.58 | APTR           | Alu-mediated CDKN1A/p21 transcriptional regulator (non-protein coding  | Upregulated |
| A_22_P000 | 0.002132 | 0.000338  | 1.58 | lnc-RNF125-3   | lnc-RNF125-3:1                                                         | Upregulated |
| A_33_P324 | 0.003094 | 0.000596  | 1.58 | KCNE4          | potassium channel, voltage gated subfamily E regulatory beta subunit 4 | Upregulated |
| A_23_P271 | 0.003535 | 0.000729  | 1.58 | NSRP1          | nuclear speckle splicing regulatory protein 1                          | Upregulated |
| A_24_P471 | 0.004579 | 0.00107   | 1.58 | VCL            | vinculin                                                               | Upregulated |
| A_33_P338 | 0.005554 | 0.00142   | 1.58 | ANKRD20A1      | ankyrin repeat domain 20 family, member A11, pseudogene                | Upregulated |
| A_23_P129 | 0.005554 | 0.00142   | 1.58 | EFCAB11        | EF-hand calcium binding domain 11                                      | Upregulated |
| A_22_P000 | 0.005554 | 0.00142   | 1.58 | STARD13        | StAR-related lipid transfer (START) domain containing 13               | Upregulated |
| A_33_P324 | 0.02016  | 0.00785   | 1.58 | DGKK           | diacylglycerol kinase, kappa                                           | Upregulated |
| A_32_P165 | 0.025419 | 0.0105    | 1.58 | IQCF2          | IQ motif containing F2                                                 | Upregulated |
| A_33_P322 | 0.031069 | 0.0135    | 1.58 | RREB1          | ras responsive element binding protein 1                               | Upregulated |
| A_33_P330 | 0.000991 | 0.0000772 | 1.57 | TAPT1          | transmembrane anterior posterior transformation 1                      | Upregulated |
| A_23_P143 | 0.001022 | 0.0000837 | 1.57 | ARHGEF3        | Rho guanine nucleotide exchange factor (GEF) 3                         | Upregulated |
| A_23_P104 | 0.001069 | 0.0000935 | 1.57 | DNAJC9         | DnaJ (Hsp40) homolog, subfamily C, member 9                            | Upregulated |
| A_21_P001 | 0.001254 | 0.00013   | 1.57 | XLOC_I2_001448 |                                                                        | Upregulated |
| A_23_P141 | 0.00129  | 0.000136  | 1.57 | SUPT6H         | suppressor of Ty 6 homolog (S. cerevisiae)                             | Upregulated |
| A_24_P940 | 0.001453 | 0.00017   | 1.57 | STK4           | serine/threonine kinase 4                                              | Upregulated |
| A_22_P000 | 0.001454 | 0.000171  | 1.57 | lnc-FAM196B    | lnc-FAM196B-1:1                                                        | Upregulated |
| A_23_P839 | 0.001563 | 0.000194  | 1.57 | KDM2A          | lysine (K)-specific demethylase 2A                                     | Upregulated |
| A_23_P605 | 0.001581 | 0.000198  | 1.57 | PRPF4          | pre-mRNA processing factor 4                                           | Upregulated |
| A_23_P214 | 0.001803 | 0.000249  | 1.57 | MTRF1L         | mitochondrial translational release factor 1-like                      | Upregulated |



|           |          |          |      |                |                                                                         |             |
|-----------|----------|----------|------|----------------|-------------------------------------------------------------------------|-------------|
| A_33_P324 | 0.005095 | 0.00125  | 1.57 | VARS           | valyl-tRNA synthetase                                                   | Upregulated |
| A_22_P000 | 0.00608  | 0.00161  | 1.57 | lnc-PLOD2-2    | lnc-PLOD2-2:1                                                           | Upregulated |
| A_23_P326 | 0.010867 | 0.00355  | 1.57 | U2AF1L4        | U2 small nuclear RNA auxiliary factor 1-like 4                          | Upregulated |
| A_23_P108 | 0.001199 | 0.000119 | 1.56 | MREG           | melanoregulin                                                           | Upregulated |
| A_24_P105 | 0.001328 | 0.000144 | 1.56 | AP1S3          | adaptor-related protein complex 1, sigma 3 subunit                      | Upregulated |
| A_23_P142 | 0.001528 | 0.000186 | 1.56 | LILRA2         | leukocyte immunoglobulin-like receptor, subfamily A (with TM domain), m | Upregulated |
| A_24_P223 | 0.001857 | 0.000263 | 1.56 | FNDC3B         | fibronectin type III domain containing 3B                               | Upregulated |
| A_22_P000 | 0.001912 | 0.000276 | 1.56 | lnc-SLC12A7    | lnc-SLC12A7-1:16                                                        | Upregulated |
| A_23_P114 | 0.002012 | 0.000304 | 1.56 | MORF4L2        | mortality factor 4 like 2                                               | Upregulated |
| A_24_P811 | 0.002258 | 0.00037  | 1.56 | PPFIBP1        | PTPRF interacting protein, binding protein 1 (liprin beta 1)            | Upregulated |
| A_33_P332 | 0.002659 | 0.000471 | 1.56 | PHACTR4        | phosphatase and actin regulator 4                                       | Upregulated |
| A_23_P407 | 0.002951 | 0.000553 | 1.56 | COMMD2         | COMM domain containing 2                                                | Upregulated |
| A_21_P001 | 0.003094 | 0.000595 | 1.56 | XLOC_I2_007967 |                                                                         | Upregulated |
| A_23_P372 | 0.003877 | 0.000835 | 1.56 | S100A13        | S100 calcium binding protein A13                                        | Upregulated |
| A_23_P876 | 0.005765 | 0.00149  | 1.56 | SART3          | squamous cell carcinoma antigen recognized by T cells 3                 | Upregulated |
| A_22_P000 | 0.006367 | 0.00172  | 1.56 | LINC00460      | long intergenic non-protein coding RNA 460                              | Upregulated |
| A_33_P327 | 0.015162 | 0.00549  | 1.56 | CLTC           | clathrin, heavy chain (Hc)                                              | Upregulated |
| A_33_P339 | 0.016157 | 0.00596  | 1.56 | P4HA2          | prolyl 4-hydroxylase, alpha polypeptide II                              | Upregulated |
| A_33_P322 | 0.021531 | 0.0085   | 1.56 | VWA8           | von Willebrand factor A domain containing 8                             | Upregulated |
| A_24_P187 | 0.028225 | 0.012    | 1.56 | BID            | BH3 interacting domain death agonist                                    | Upregulated |
| A_23_P332 | 0.032256 | 0.0141   | 1.56 | ARHGEF19       | Rho guanine nucleotide exchange factor (GEF) 19                         | Upregulated |
| A_24_P256 | 0.032256 | 0.0141   | 1.56 | LOC1001282     | uncharacterized LOC100128288                                            | Upregulated |
| A_22_P000 | 0.001108 | 0.000101 | 1.55 | CECR7          | cat eye syndrome chromosome region, candidate 7 (non-protein coding     | Upregulated |
| A_23_P164 | 0.001171 | 0.000113 | 1.55 | ZBTB45         | zinc finger and BTB domain containing 45                                | Upregulated |
| A_24_P190 | 0.001297 | 0.000138 | 1.55 | TMEM97         | transmembrane protein 97                                                | Upregulated |
| A_23_P102 | 0.001331 | 0.000144 | 1.55 | BCL2L13        | BCL2-like 13 (apoptosis facilitator)                                    | Upregulated |
| A_33_P352 | 0.001412 | 0.000161 | 1.55 | GRPEL1         | GrpE-like 1, mitochondrial (E. coli)                                    | Upregulated |
| A_23_P583 | 0.001438 | 0.000166 | 1.55 | C4orf32        | chromosome 4 open reading frame 32                                      | Upregulated |
| A_33_P333 | 0.002078 | 0.000322 | 1.55 | DEFB109P1      | defensin, beta 109, pseudogene 1                                        | Upregulated |
| A_23_P954 | 0.002572 | 0.00045  | 1.55 | NRXN1          | neurexin 1                                                              | Upregulated |
| A_23_P539 | 0.002625 | 0.000463 | 1.55 | TP53I3         | tumor protein p53 inducible protein 3                                   | Upregulated |
| A_22_P000 | 0.003684 | 0.000774 | 1.55 | C21orf91-OT    | C21orf91 overlapping transcript 1                                       | Upregulated |
| A_33_P341 | 0.007348 | 0.0021   | 1.55 | HP1BP3         | heterochromatin protein 1, binding protein 3                            | Upregulated |
| A_33_P321 | 0.010348 | 0.00334  | 1.55 | SMARCAL1       | SWI/SNF related, matrix associated, actin dependent regulator of chrom  | Upregulated |
| A_33_P335 | 0.011193 | 0.00369  | 1.55 | RNASEH2C       | ribonuclease H2, subunit C                                              | Upregulated |
| A_33_P377 | 0.011221 | 0.00371  | 1.55 | GK5            | glycerol kinase 5 (putative)                                            | Upregulated |
| A_33_P326 | 0.011221 | 0.00371  | 1.55 | lnc-ELF2-2     | lnc-ELF2-2:3                                                            | Upregulated |

|           |          |           |      |              |                                                                                  |             |
|-----------|----------|-----------|------|--------------|----------------------------------------------------------------------------------|-------------|
| A_33_P339 | 0.014228 | 0.00505   | 1.55 | VSIG10L      | V-set and immunoglobulin domain containing 10 like                               | Upregulated |
| A_22_P000 | 0.019522 | 0.00755   | 1.55 | LINC00635    | long intergenic non-protein coding RNA 635                                       | Upregulated |
| A_33_P330 | 0.030749 | 0.0133    | 1.55 | PLEKHB1      | pleckstrin homology domain containing, family B (evectins) member 1              | Upregulated |
| A_32_P230 | 0.001049 | 0.0000883 | 1.54 | GAS5         | growth arrest-specific 5 (non-protein coding)                                    | Upregulated |
| A_32_P149 | 0.001198 | 0.000118  | 1.54 | DNAJC18      | DnaJ (Hsp40) homolog, subfamily C, member 18                                     | Upregulated |
| A_23_P244 | 0.001245 | 0.000128  | 1.54 | TMEM5        | transmembrane protein 5                                                          | Upregulated |
| A_24_P325 | 0.001429 | 0.000164  | 1.54 | FAM160B1     | family with sequence similarity 160, member B1                                   | Upregulated |
| A_23_P214 | 0.001443 | 0.000167  | 1.54 | MTHFD1L      | methylenetetrahydrofolate dehydrogenase (NADP+ dependent) 1-like                 | Upregulated |
| A_33_P332 | 0.001451 | 0.000169  | 1.54 | RAB3IP       | RAB3A interacting protein                                                        | Upregulated |
| A_33_P328 | 0.001469 | 0.000174  | 1.54 | MLLT1        | myeloid/lymphoid or mixed-lineage leukemia (trithorax homolog, Drosophila)       | Upregulated |
| A_33_P364 | 0.001753 | 0.000237  | 1.54 | PDCD4-AS1    | PDCD4 antisense RNA 1                                                            | Upregulated |
| A_21_P001 | 0.001809 | 0.000251  | 1.54 | LOC729815    | uncharacterized LOC729815                                                        | Upregulated |
| A_22_P000 | 0.001812 | 0.000252  | 1.54 | lnc-WNT11-2  | lnc-WNT11-2:1                                                                    | Upregulated |
| A_24_P908 | 0.001881 | 0.000269  | 1.54 | THUMPD1      | THUMP domain containing 1                                                        | Upregulated |
| A_23_P884 | 0.002163 | 0.000344  | 1.54 | INTS9        | integrator complex subunit 9                                                     | Upregulated |
| A_23_P906 | 0.002172 | 0.000347  | 1.54 | MCM6         | minichromosome maintenance complex component 6                                   | Upregulated |
| A_23_P139 | 0.004971 | 0.0012    | 1.54 | RSF1         | remodeling and spacing factor 1                                                  | Upregulated |
| A_23_P334 | 0.007108 | 0.00201   | 1.54 | FAM126B      | family with sequence similarity 126, member B                                    | Upregulated |
| A_23_P200 | 0.011035 | 0.00362   | 1.54 | MAGOH        | mago-nashi homolog, proliferation-associated (Drosophila)                        | Upregulated |
| A_33_P321 | 0.013879 | 0.00488   | 1.54 | ANKRD36      | ankyrin repeat domain 36                                                         | Upregulated |
| A_32_P154 | 0.015315 | 0.00556   | 1.54 | RNF185       | ring finger protein 185                                                          | Upregulated |
| A_33_P338 | 0.024963 | 0.0103    | 1.54 | TBC1D3B      | TBC1 domain family, member 3B                                                    | Upregulated |
| A_32_P103 | 0.033635 | 0.0148    | 1.54 | MCM2         | minichromosome maintenance complex component 2                                   | Upregulated |
| A_21_P001 | 0.040788 | 0.0188    | 1.54 | GS1-259H13   | transmembrane protein 225-like                                                   | Upregulated |
| A_23_P337 | 0.059984 | 0.0298    | 1.54 | TOM1L2       | target of myb1-like 2 (chicken)                                                  | Upregulated |
| A_33_P339 | 0.001092 | 0.0000974 | 1.53 | ATL2         | atlastin GTPase 2                                                                | Upregulated |
| A_24_P113 | 0.001105 | 0.0001    | 1.53 | SLC35E2      | solute carrier family 35, member E2                                              | Upregulated |
| A_21_P000 | 0.001201 | 0.000119  | 1.53 | SNHG4        | small nucleolar RNA host gene 4 (non-protein coding)                             | Upregulated |
| A_33_P326 | 0.001243 | 0.000128  | 1.53 | CSNK1G1      | casein kinase 1, gamma 1                                                         | Upregulated |
| A_23_P208 | 0.00129  | 0.000136  | 1.53 | MAP2K2       | mitogen-activated protein kinase kinase 2                                        | Upregulated |
| A_23_P581 | 0.001415 | 0.000162  | 1.53 | EXOSC7       | exosome component 7                                                              | Upregulated |
| A_23_P123 | 0.001476 | 0.000175  | 1.53 | EXOSC3       | exosome component 3                                                              | Upregulated |
| A_22_P000 | 0.00261  | 0.000459  | 1.53 | lnc-SH3RF2-1 | lnc-SH3RF2-1:1                                                                   | Upregulated |
| A_33_P324 | 0.002696 | 0.000482  | 1.53 | SLC7A11      | solute carrier family 7 (anionic amino acid transporter light chain, xc- system) | Upregulated |
| A_33_P353 | 0.002967 | 0.000558  | 1.53 | C1QTNF9B-A   | C1QTNF9B antisense RNA 1                                                         | Upregulated |
| A_24_P350 | 0.00343  | 0.000697  | 1.53 | TNIK         | TRAF2 and NCK interacting kinase                                                 | Upregulated |
| A_32_P163 | 0.003648 | 0.000763  | 1.53 | VDAC1        | voltage-dependent anion channel 1                                                | Upregulated |

|           |          |          |      |               |                                                                                         |             |
|-----------|----------|----------|------|---------------|-----------------------------------------------------------------------------------------|-------------|
| A_33_P333 | 0.004156 | 0.000923 | 1.53 | METTL10       | methyltransferase like 10                                                               | Upregulated |
| A_24_P982 | 0.005207 | 0.00129  | 1.53 | VPS13B        | vacuolar protein sorting 13 homolog B (yeast)                                           | Upregulated |
| A_33_P322 | 0.005457 | 0.00138  | 1.53 | MIER2         | mesoderm induction early response 1, family member 2                                    | Upregulated |
| A_21_P000 | 0.005502 | 0.0014   | 1.53 | lnc-ZNF486-1  | lnc-ZNF486-1:1                                                                          | Upregulated |
| A_33_P336 | 0.007778 | 0.00228  | 1.53 | TMEM194B      | transmembrane protein 194B                                                              | Upregulated |
| A_22_P000 | 0.007958 | 0.00235  | 1.53 | lnc-IRX2-5    | lnc-IRX2-5:1                                                                            | Upregulated |
| A_33_P334 | 0.015738 | 0.00576  | 1.53 | RC3H2         | ring finger and CCCH-type domains 2                                                     | Upregulated |
| A_23_P410 | 0.023814 | 0.00967  | 1.53 | TEX264        | testis expressed 264                                                                    | Upregulated |
| A_23_P168 | 0.02435  | 0.00995  | 1.53 | FBXO16        | F-box protein 16                                                                        | Upregulated |
| A_32_P790 | 0.029856 | 0.0128   | 1.53 | KATNAL2       | katanin p60 subunit A-like 2                                                            | Upregulated |
| A_23_P211 | 0.047957 | 0.0228   | 1.53 | TGFBR2        | transforming growth factor, beta receptor II (70/80kDa)                                 | Upregulated |
| A_23_P162 | 0.059037 | 0.0293   | 1.53 | SERPINE3      | serpin peptidase inhibitor, clade E (nexin, plasminogen activator inhibitor 3) member 3 | Upregulated |
| A_23_P133 | 0.001062 | 0.000909 | 1.52 | TCERG1        | transcription elongation regulator 1                                                    | Upregulated |
| A_33_P323 | 0.00114  | 0.000107 | 1.52 | HIF1A         | hypoxia inducible factor 1, alpha subunit (basic helix-loop-helix transcription factor) | Upregulated |
| A_24_P305 | 0.00115  | 0.000109 | 1.52 | LEMD2         | LEM domain containing 2                                                                 | Upregulated |
| A_22_P000 | 0.001154 | 0.00011  | 1.52 | lnc-RP11-392  | lnc-RP11-392O18.1.1-2:1                                                                 | Upregulated |
| A_33_P341 | 0.001197 | 0.000118 | 1.52 | RLIM          | ring finger protein, LIM domain interacting                                             | Upregulated |
| A_23_P256 | 0.001253 | 0.00013  | 1.52 | TRAPPC12      | trafficking protein particle complex 12                                                 | Upregulated |
| A_23_P222 | 0.001394 | 0.000157 | 1.52 | EIF4EBP1      | eukaryotic translation initiation factor 4E binding protein 1                           | Upregulated |
| A_23_P329 | 0.001409 | 0.000161 | 1.52 | ILF3          | interleukin enhancer binding factor 3, 90kDa                                            | Upregulated |
| A_22_P000 | 0.001498 | 0.00018  | 1.52 | lnc-GRID2IP-1 | lnc-GRID2IP-1:1                                                                         | Upregulated |
| A_23_P314 | 0.001668 | 0.000217 | 1.52 | LEO1          | Leo1, Paf1/RNA polymerase II complex component, homolog (S. cerevisiae)                 | Upregulated |
| A_33_P329 | 0.001751 | 0.000236 | 1.52 | SMC1A         | structural maintenance of chromosomes 1A                                                | Upregulated |
| A_22_P000 | 0.001954 | 0.000288 | 1.52 | TUG1          | taurine up-regulated 1 (non-protein coding)                                             | Upregulated |
| A_33_P331 | 0.003287 | 0.000655 | 1.52 | NUS1          | nuclear undecaprenyl pyrophosphate synthase 1 homolog (S. cerevisiae)                   | Upregulated |
| A_23_P416 | 0.004301 | 0.000973 | 1.52 | TAS2R31       | taste receptor, type 2, member 31                                                       | Upregulated |
| A_23_P145 | 0.00479  | 0.00114  | 1.52 | ZNF318        | zinc finger protein 318                                                                 | Upregulated |
| A_23_P253 | 0.006568 | 0.0018   | 1.52 | FAM175A       | family with sequence similarity 175, member A                                           | Upregulated |
| A_33_P339 | 0.00733  | 0.0021   | 1.52 | ZNF441        | zinc finger protein 441                                                                 | Upregulated |
| A_24_P303 | 0.007614 | 0.00221  | 1.52 | CXCL10        | chemokine (C-X-C motif) ligand 10                                                       | Upregulated |
| A_22_P000 | 0.013997 | 0.00493  | 1.52 | LOC1019277    | uncharacterized LOC101927793                                                            | Upregulated |
| A_19_P003 | 0.015108 | 0.00547  | 1.52 | LOC1005059    | uncharacterized LOC100505920                                                            | Upregulated |
| A_33_P338 | 0.015108 | 0.00547  | 1.52 | PLB1          | phospholipase B1                                                                        | Upregulated |
| A_22_P000 | 0.029471 | 0.0126   | 1.52 | lnc-TYMS-2    | lnc-TYMS-2:1                                                                            | Upregulated |
| A_33_P335 | 0.031902 | 0.0139   | 1.52 | SUV420H2      | suppressor of variegation 4-20 homolog 2 (Drosophila)                                   | Upregulated |
| A_22_P000 | 0.039388 | 0.018    | 1.52 | lnc-ZNF790-1  | lnc-ZNF790-1:1                                                                          | Upregulated |
| A_22_P000 | 0.040403 | 0.0186   | 1.52 | LOC1019291    | uncharacterized LOC101929172                                                            | Upregulated |

|           |          |           |      |                |                                                                                 |             |
|-----------|----------|-----------|------|----------------|---------------------------------------------------------------------------------|-------------|
| A_21_P000 | 0.00104  | 0.0000865 | 1.51 | lnc-ZFP36L1-   | lnc-ZFP36L1-1:1                                                                 | Upregulated |
| A_23_P215 | 0.001047 | 0.0000881 | 1.51 | ATP5J2         | ATP synthase, H <sup>+</sup> transporting, mitochondrial Fo complex, subunit F2 | Upregulated |
| A_23_P339 | 0.001052 | 0.0000889 | 1.51 | HAT1           | histone acetyltransferase 1                                                     | Upregulated |
| A_32_P950 | 0.001055 | 0.0000897 | 1.51 | AK4            | adenylate kinase 4                                                              | Upregulated |
| A_24_P161 | 0.001105 | 0.0001    | 1.51 | ZFAS1          | ZNFX1 antisense RNA 1                                                           | Upregulated |
| A_33_P334 | 0.001107 | 0.000101  | 1.51 | OPA1           | optic atrophy 1 (autosomal dominant)                                            | Upregulated |
| A_23_P341 | 0.001134 | 0.000106  | 1.51 | KLHL21         | kelch-like family member 21                                                     | Upregulated |
| A_24_P928 | 0.001203 | 0.00012   | 1.51 | LMAN2          | lectin, mannose-binding 2                                                       | Upregulated |
| A_23_P976 | 0.00124  | 0.000127  | 1.51 | RRAGC          | Ras-related GTP binding C                                                       | Upregulated |
| A_23_P735 | 0.001458 | 0.000172  | 1.51 | ARAF           | A-Raf proto-oncogene, serine/threonine kinase                                   | Upregulated |
| A_23_P468 | 0.002167 | 0.000346  | 1.51 | BTRC           | beta-transducin repeat containing E3 ubiquitin protein ligase                   | Upregulated |
| A_23_P742 | 0.003316 | 0.000665  | 1.51 | SRM            | spermidine synthase                                                             | Upregulated |
| A_33_P334 | 0.003631 | 0.000758  | 1.51 | ZBTB38         | zinc finger and BTB domain containing 38                                        | Upregulated |
| A_23_P782 | 0.003706 | 0.000781  | 1.51 | FAM26F         | family with sequence similarity 26, member F                                    | Upregulated |
| A_33_P330 | 0.00419  | 0.000935  | 1.51 | KIAA1841       | KIAA1841                                                                        | Upregulated |
| A_22_P000 | 0.004196 | 0.000937  | 1.51 | lnc-TMED5-1    | lnc-TMED5-1:27                                                                  | Upregulated |
| A_32_P730 | 0.004748 | 0.00113   | 1.51 | CMAS           | cytidine monophosphate N-acetylneuraminic acid synthetase                       | Upregulated |
| A_32_P589 | 0.00479  | 0.00114   | 1.51 | MBTD1          | mbt domain containing 1                                                         | Upregulated |
| A_33_P341 | 0.004841 | 0.00116   | 1.51 | C7orf60        | chromosome 7 open reading frame 60                                              | Upregulated |
| A_21_P000 | 0.010047 | 0.00321   | 1.51 | lnc-SOX6-1     | lnc-SOX6-1:1                                                                    | Upregulated |
| A_33_P342 | 0.011268 | 0.00373   | 1.51 | RSU1           | Ras suppressor protein 1                                                        | Upregulated |
| A_23_P941 | 0.036858 | 0.0166    | 1.51 | RAD54B         | RAD54 homolog B ( <i>S. cerevisiae</i> )                                        | Upregulated |
| A_21_P001 | 0.041579 | 0.0192    | 1.51 | XLOC_I2_010348 |                                                                                 | Upregulated |
| A_22_P000 | 0.051415 | 0.0248    | 1.51 | lnc-CNOT7-1    | lnc-CNOT7-1:1                                                                   | Upregulated |
| A_22_P000 | 0.001115 | 0.000102  | 1.5  | LOC1019271     | uncharacterized LOC101927104                                                    | Upregulated |
| A_33_P321 | 0.001171 | 0.000113  | 1.5  | RCC2           | regulator of chromosome condensation 2                                          | Upregulated |
| A_23_P201 | 0.001336 | 0.000145  | 1.5  | CREM           | cAMP responsive element modulator                                               | Upregulated |
| A_21_P000 | 0.00142  | 0.000163  | 1.5  | USP12-AS2      | USP12 antisense RNA 2 (head to head)                                            | Upregulated |
| A_22_P000 | 0.001476 | 0.000175  | 1.5  | FAM155A-IT1    | FAM155A intronic transcript 1 (non-protein coding)                              | Upregulated |
| A_19_P008 | 0.00168  | 0.00022   | 1.5  | lnc-OSTC-2     | lnc-OSTC-2:1                                                                    | Upregulated |
| A_33_P366 | 0.00168  | 0.00022   | 1.5  | LOC284669      | uncharacterized LOC284669                                                       | Upregulated |
| A_24_P277 | 0.002096 | 0.000325  | 1.5  | CNPY3          | canopy FGF signaling regulator 3                                                | Upregulated |
| A_23_P251 | 0.0021   | 0.000326  | 1.5  | NSUN5          | NOP2/Sun domain family, member 5                                                | Upregulated |
| A_22_P000 | 0.00293  | 0.000546  | 1.5  | lnc-MTHFR-2    | lnc-MTHFR-2:1                                                                   | Upregulated |
| A_22_P000 | 0.002941 | 0.000549  | 1.5  | lnc-INPPL1-1   | lnc-INPPL1-1:1                                                                  | Upregulated |
| A_24_P231 | 0.003889 | 0.000839  | 1.5  | BOD1L1         | biorientation of chromosomes in cell division 1-like 1                          | Upregulated |
| A_24_P261 | 0.006914 | 0.00193   | 1.5  | VPRBP          | Vpr (HIV-1) binding protein                                                     | Upregulated |

|           |          |           |      |                |                                                                 |             |
|-----------|----------|-----------|------|----------------|-----------------------------------------------------------------|-------------|
| A_23_P324 | 0.01058  | 0.00343   | 1.5  | DISP2          | dispatched homolog 2 (Drosophila)                               | Upregulated |
| A_24_P385 | 0.019404 | 0.0075    | 1.5  | NOL6           | nucleolar protein 6 (RNA-associated)                            | Upregulated |
| A_23_P430 | 0.023487 | 0.00949   | 1.5  | INTS8          | integrator complex subunit 8                                    | Upregulated |
| A_21_P000 | 0.023986 | 0.00976   | 1.5  | lnc-RASA1-3    | lnc-RASA1-3:1                                                   | Upregulated |
| A_23_P140 | 0.031297 | 0.0136    | 1.5  | MYO5C          | myosin VC                                                       | Upregulated |
| A_32_P212 | 0.031758 | 0.0138    | 1.5  | CEP19          | centrosomal protein 19kDa                                       | Upregulated |
| A_21_P000 | 0.0352   | 0.0157    | 1.5  | NKAPP1         | NFKB activating protein pseudogene 1                            | Upregulated |
| A_33_P326 | 0.044346 | 0.0208    | 1.5  | TDRD10         | tudor domain containing 10                                      | Upregulated |
| A_23_P215 | 0.00126  | 0.000131  | 1.49 | AHR            | aryl hydrocarbon receptor                                       | Upregulated |
| A_23_P102 | 0.001333 | 0.000145  | 1.49 | SSFA2          | sperm specific antigen 2                                        | Upregulated |
| A_23_P168 | 0.001443 | 0.000168  | 1.49 | HERPUD2        | HERPUD family member 2                                          | Upregulated |
| A_33_P329 | 0.001478 | 0.000176  | 1.49 | DCAF16         | DDB1 and CUL4 associated factor 16                              | Upregulated |
| A_32_P749 | 0.001548 | 0.00019   | 1.49 | EIF1AD         | eukaryotic translation initiation factor 1A domain containing   | Upregulated |
| A_21_P001 | 0.0017   | 0.000226  | 1.49 | XLOC_I2_001967 |                                                                 | Upregulated |
| A_33_P331 | 0.002258 | 0.00037   | 1.49 | RBMS1          | RNA binding motif, single stranded interacting protein 1        | Upregulated |
| A_32_P687 | 0.00376  | 0.000798  | 1.49 | SMU1           | smu-1 suppressor of mec-8 and unc-52 homolog (C. elegans)       | Upregulated |
| A_19_P008 | 0.004094 | 0.000902  | 1.49 | lnc-HIST1H1A   | lnc-HIST1H1A-1:2                                                | Upregulated |
| A_22_P000 | 0.0056   | 0.00143   | 1.49 | LOC1019289     | uncharacterized LOC101928989                                    | Upregulated |
| A_22_P000 | 0.007045 | 0.00199   | 1.49 | lnc-C9orf163   | lnc-C9orf163-1:1                                                | Upregulated |
| A_23_P207 | 0.009601 | 0.00302   | 1.49 | RNFT1          | ring finger protein, transmembrane 1                            | Upregulated |
| A_21_P000 | 0.012808 | 0.0044    | 1.49 | lnc-CHL1-1     | lnc-CHL1-1:3                                                    | Upregulated |
| A_22_P000 | 0.048098 | 0.0229    | 1.49 | LOC1001313     | uncharacterized LOC100131315                                    | Upregulated |
| A_23_P551 | 0.001076 | 0.0000945 | 1.48 | EFTUD2         | elongation factor Tu GTP binding domain containing 2            | Upregulated |
| A_23_P562 | 0.001243 | 0.000128  | 1.48 | GMIP           | GEM interacting protein                                         | Upregulated |
| A_23_P113 | 0.00142  | 0.000163  | 1.48 | ATP6AP2        | ATPase, H+ transporting, lysosomal accessory protein 2          | Upregulated |
| A_23_P311 | 0.001821 | 0.000255  | 1.48 | MITD1          | MIT, microtubule interacting and transport, domain containing 1 | Upregulated |
| A_23_P828 | 0.001827 | 0.000257  | 1.48 | PINX1          | PIN2/TERF1 interacting, telomerase inhibitor 1                  | Upregulated |
| A_32_P233 | 0.002078 | 0.000322  | 1.48 | FAM133B        | family with sequence similarity 133, member B                   | Upregulated |
| A_33_P336 | 0.003155 | 0.000615  | 1.48 | PAM            | peptidylglycine alpha-amidating monooxygenase                   | Upregulated |
| A_23_P215 | 0.003751 | 0.000796  | 1.48 | TYW1           | tRNA-yW synthesizing protein 1 homolog (S. cerevisiae)          | Upregulated |
| A_23_P376 | 0.003909 | 0.000845  | 1.48 | CLYBL          | citrate lyase beta like                                         | Upregulated |
| A_33_P322 | 0.006617 | 0.00182   | 1.48 | HERC2P10       | hect domain and RLD 2 pseudogene 10                             | Upregulated |
| A_23_P110 | 0.006606 | 0.00182   | 1.48 | HERC5          | HECT and RLD domain containing E3 ubiquitin protein ligase 5    | Upregulated |
| A_33_P337 | 0.011063 | 0.00364   | 1.48 | TNPO3          | transportin 3                                                   | Upregulated |
| A_23_P677 | 0.016609 | 0.00618   | 1.48 | SPAG16         | sperm associated antigen 16                                     | Upregulated |
| A_23_P303 | 0.025744 | 0.0107    | 1.48 | CRYBG3         | beta-gamma crystallin domain containing 3                       | Upregulated |
| A_33_P340 | 0.001376 | 0.000153  | 1.47 | PPM1B          | protein phosphatase, Mg2+/Mn2+ dependent, 1B                    | Upregulated |

|           |          |          |      |                |                                                                            |             |
|-----------|----------|----------|------|----------------|----------------------------------------------------------------------------|-------------|
| A_23_P205 | 0.001795 | 0.000247 | 1.47 | MAP4K5         | mitogen-activated protein kinase kinase kinase kinase 5                    | Upregulated |
| A_23_P146 | 0.002696 | 0.000482 | 1.47 | BAG1           | BCL2-associated athanogene                                                 | Upregulated |
| A_19_P008 | 0.002984 | 0.000563 | 1.47 | lnc-GXYLT1-2   | lnc-GXYLT1-2:1                                                             | Upregulated |
| A_32_P234 | 0.004162 | 0.000926 | 1.47 | ARMC1          | armadillo repeat containing 1                                              | Upregulated |
| A_22_P000 | 0.00605  | 0.0016   | 1.47 | LOC1019275     | uncharacterized LOC101927518                                               | Upregulated |
| A_23_P205 | 0.007407 | 0.00213  | 1.47 | NR2E3          | nuclear receptor subfamily 2, group E, member 3                            | Upregulated |
| A_32_P201 | 0.008875 | 0.00272  | 1.47 | HECTD2         | HECT domain containing E3 ubiquitin protein ligase 2                       | Upregulated |
| A_33_P321 | 0.009576 | 0.00301  | 1.47 | TYW1           | tRNA-yW synthesizing protein 1 homolog (S. cerevisiae)                     | Upregulated |
| A_24_P127 | 0.011428 | 0.0038   | 1.47 | CLASP2         | cytoplasmic linker associated protein 2                                    | Upregulated |
| A_22_P000 | 0.012965 | 0.00447  | 1.47 | lnc-PHKB-5     | lnc-PHKB-5:1                                                               | Upregulated |
| A_22_P000 | 0.016831 | 0.00629  | 1.47 | LINC00443      | long intergenic non-protein coding RNA 443                                 | Upregulated |
| A_33_P369 | 0.01825  | 0.00695  | 1.47 | LHFPL3-AS2     | LHFPL3 antisense RNA 2                                                     | Upregulated |
| A_23_P977 | 0.036455 | 0.0164   | 1.47 | TXNIP          | thioredoxin interacting protein                                            | Upregulated |
| A_22_P000 | 0.039243 | 0.0179   | 1.47 | lnc-YWHAZ-1    | lnc-YWHAZ-1:1                                                              | Upregulated |
| A_33_P325 | 0.001108 | 0.000101 | 1.46 | C16orf91       | chromosome 16 open reading frame 91                                        | Upregulated |
| A_23_P405 | 0.001215 | 0.000122 | 1.46 | CDC14A         | cell division cycle 14A                                                    | Upregulated |
| A_23_P686 | 0.001354 | 0.000149 | 1.46 | ADRM1          | adhesion regulating molecule 1                                             | Upregulated |
| A_33_P338 | 0.001394 | 0.000156 | 1.46 | AKT2           | v-akt murine thymoma viral oncogene homolog 2                              | Upregulated |
| A_23_P147 | 0.001721 | 0.000231 | 1.46 | ADPGK          | ADP-dependent glucokinase                                                  | Upregulated |
| A_32_P788 | 0.001763 | 0.00024  | 1.46 | PSPH           | phosphoserine phosphatase                                                  | Upregulated |
| A_23_P164 | 0.00188  | 0.000269 | 1.46 | MFAP4          | microfibrillar-associated protein 4                                        | Upregulated |
| A_33_P339 | 0.002067 | 0.000318 | 1.46 | ZNF420         | zinc finger protein 420                                                    | Upregulated |
| A_22_P000 | 0.002351 | 0.000391 | 1.46 | lnc-NMNAT1-3   | lnc-NMNAT1-3:1                                                             | Upregulated |
| A_21_P001 | 0.002361 | 0.000394 | 1.46 | XLOC_I2_012870 |                                                                            | Upregulated |
| A_33_P337 | 0.002667 | 0.000474 | 1.46 | MITD1          | MIT, microtubule interacting and transport, domain containing 1            | Upregulated |
| A_24_P294 | 0.003323 | 0.000667 | 1.46 | TMEM14B        | transmembrane protein 14B                                                  | Upregulated |
| A_21_P000 | 0.003878 | 0.000836 | 1.46 | SNORD49A       | small nucleolar RNA, C/D box 49A                                           | Upregulated |
| A_21_P001 | 0.005496 | 0.00139  | 1.46 | THEGL          | theg spermatid protein-like                                                | Upregulated |
| A_33_P332 | 0.006945 | 0.00195  | 1.46 | ZNF615         | zinc finger protein 615                                                    | Upregulated |
| A_23_P203 | 0.007867 | 0.00231  | 1.46 | SCARB1         | scavenger receptor class B, member 1                                       | Upregulated |
| A_22_P000 | 0.009276 | 0.00289  | 1.46 | lnc-TNN-1      | lnc-TNN-1:1                                                                | Upregulated |
| A_23_P412 | 0.016749 | 0.00625  | 1.46 | MFSD10         | major facilitator superfamily domain containing 10                         | Upregulated |
| A_23_P582 | 0.001117 | 0.000103 | 1.45 | GAR1           | GAR1 ribonucleoprotein                                                     | Upregulated |
| A_22_P000 | 0.001135 | 0.000107 | 1.45 | lnc-KLLN-1     | lnc-KLLN-1:1                                                               | Upregulated |
| A_33_P337 | 0.001135 | 0.000107 | 1.45 | MLLT6          | myeloid/lymphoid or mixed-lineage leukemia (trithorax homolog, Drosophila) | Upregulated |
| A_33_P321 | 0.001187 | 0.000116 | 1.45 | INSIG1         | insulin induced gene 1                                                     | Upregulated |
| A_33_P335 | 0.00125  | 0.000129 | 1.45 | NUSAP1         | nucleolar and spindle associated protein 1                                 | Upregulated |

|           |          |          |      |             |                                                                         |             |
|-----------|----------|----------|------|-------------|-------------------------------------------------------------------------|-------------|
| A_23_P391 | 0.001365 | 0.000151 | 1.45 | IVNS1ABP    | influenza virus NS1A binding protein                                    | Upregulated |
| A_23_P255 | 0.001386 | 0.000155 | 1.45 | DAPP1       | dual adaptor of phosphotyrosine and 3-phosphoinositides                 | Upregulated |
| A_33_P338 | 0.001396 | 0.000157 | 1.45 | SNX30       | sorting nexin family member 30                                          | Upregulated |
| A_33_P335 | 0.001415 | 0.000162 | 1.45 | SLAMF1      | signaling lymphocytic activation molecule family member 1               | Upregulated |
| A_22_P000 | 0.001522 | 0.000185 | 1.45 | BTG1        | B-cell translocation gene 1, anti-proliferative                         | Upregulated |
| A_33_P325 | 0.001594 | 0.000199 | 1.45 | SLC36A1     | solute carrier family 36 (proton/amino acid symporter), member 1        | Upregulated |
| A_32_P191 | 0.00165  | 0.000213 | 1.45 | SETD8       | SET domain containing (lysine methyltransferase) 8                      | Upregulated |
| A_23_P132 | 0.001848 | 0.000261 | 1.45 | TPST2       | tyrosylprotein sulfotransferase 2                                       | Upregulated |
| A_22_P000 | 0.003109 | 0.000602 | 1.45 | lnc-FAM129B | lnc-FAM129B-1:1                                                         | Upregulated |
| A_33_P339 | 0.007045 | 0.00199  | 1.45 | BRWD1       | bromodomain and WD repeat domain containing 1                           | Upregulated |
| A_24_P383 | 0.007257 | 0.00207  | 1.45 | KRTAP13-1   | keratin associated protein 13-1                                         | Upregulated |
| A_33_P328 | 0.017536 | 0.00661  | 1.45 | ZNF778      | zinc finger protein 778                                                 | Upregulated |
| A_23_P866 | 0.001173 | 0.000113 | 1.44 | SRGN        | serglycin                                                               | Upregulated |
| A_33_P331 | 0.001187 | 0.000116 | 1.44 | BTNL9       | butyrophilin-like 9                                                     | Upregulated |
| A_23_P142 | 0.001187 | 0.000116 | 1.44 | GRWD1       | glutamate-rich WD repeat containing 1                                   | Upregulated |
| A_33_P327 | 0.001263 | 0.000132 | 1.44 | ZNF701      | zinc finger protein 701                                                 | Upregulated |
| A_22_P000 | 0.001341 | 0.000146 | 1.44 | lnc-OIT3-2  | lnc-OIT3-2:1                                                            | Upregulated |
| A_33_P325 | 0.001616 | 0.000205 | 1.44 | SEC22C      | SEC22 vesicle trafficking protein homolog C (S. cerevisiae)             | Upregulated |
| A_23_P167 | 0.001697 | 0.000225 | 1.44 | RNF4        | ring finger protein 4                                                   | Upregulated |
| A_33_P321 | 0.001784 | 0.000245 | 1.44 | FAM3A       | family with sequence similarity 3, member A                             | Upregulated |
| A_23_P408 | 0.001785 | 0.000245 | 1.44 | MXD1        | MAX dimerization protein 1                                              | Upregulated |
| A_22_P000 | 0.001861 | 0.000264 | 1.44 | TAF10       | TAF10 RNA polymerase II, TATA box binding protein (TBP)-associated i    | Upregulated |
| A_23_P132 | 0.001959 | 0.00029  | 1.44 | PES1        | pescadillo ribosomal biogenesis factor 1                                | Upregulated |
| A_23_P857 | 0.002021 | 0.000306 | 1.44 | GNPAT       | glyceronephosphate O-acyltransferase                                    | Upregulated |
| A_23_P134 | 0.002579 | 0.000452 | 1.44 | CDYL        | chromodomain protein, Y-like                                            | Upregulated |
| A_23_P138 | 0.002687 | 0.000479 | 1.44 | NOC2L       | nucleolar complex associated 2 homolog (S. cerevisiae)                  | Upregulated |
| A_24_P101 | 0.002794 | 0.000508 | 1.44 | NOP56       | NOP56 ribonucleoprotein                                                 | Upregulated |
| A_23_P266 | 0.002832 | 0.000519 | 1.44 | NMRAL1      | NmrA-like family domain containing 1                                    | Upregulated |
| A_23_P302 | 0.003036 | 0.000579 | 1.44 | IPO11       | importin 11                                                             | Upregulated |
| A_23_P521 | 0.003595 | 0.000748 | 1.44 | ACBD6       | acyl-CoA binding domain containing 6                                    | Upregulated |
| A_23_P208 | 0.004582 | 0.00107  | 1.44 | SEMA6B      | sema domain, transmembrane domain (TM), and cytoplasmic domain, (s      | Upregulated |
| A_23_P316 | 0.00479  | 0.00114  | 1.44 | ZBED6CL     | ZBED6 C-terminal like                                                   | Upregulated |
| A_23_P543 | 0.00812  | 0.00241  | 1.44 | MEGF11      | multiple EGF-like-domains 11                                            | Upregulated |
| A_33_P331 | 0.014594 | 0.00522  | 1.44 | ZDHHC8      | zinc finger, DHHC-type containing 8                                     | Upregulated |
| A_33_P324 | 0.019729 | 0.00764  | 1.44 | EMR4P       | egf-like module containing, mucin-like, hormone receptor-like 4 pseudog | Upregulated |
| A_21_P001 | 0.029345 | 0.0125   | 1.44 | LOC1019283  | uncharacterized LOC10192831                                             | Upregulated |
| A_33_P330 | 0.037574 | 0.017    | 1.44 | PDPR        | pyruvate dehydrogenase phosphatase regulatory subunit                   | Upregulated |

|           |          |          |      |              |                                                                         |             |
|-----------|----------|----------|------|--------------|-------------------------------------------------------------------------|-------------|
| A_19_P008 | 0.037658 | 0.0171   | 1.44 | NASP         | nuclear autoantigenic sperm protein (histone-binding)                   | Upregulated |
| A_21_P000 | 0.049868 | 0.0239   | 1.44 | lnc-FAM53A-2 | lnc-FAM53A-2:1                                                          | Upregulated |
| A_23_P387 | 0.061638 | 0.0308   | 1.44 | CDH2         | cadherin 2, type 1, N-cadherin (neuronal)                               | Upregulated |
| A_32_P108 | 0.001173 | 0.000114 | 1.43 | MIR155HG     | MIR155 host gene (non-protein coding)                                   | Upregulated |
| A_23_P215 | 0.001226 | 0.000124 | 1.43 | POLR2J3      | polymerase (RNA) II (DNA directed) polypeptide J3                       | Upregulated |
| A_23_P494 | 0.001322 | 0.000142 | 1.43 | ST6GALNAC    | ST6 (alpha-N-acetyl-neuraminyl-2,3-beta-galactosyl-1,3)-N-acetylgalacto | Upregulated |
| A_23_P205 | 0.001344 | 0.000147 | 1.43 | GABPB1       | GA binding protein transcription factor, beta subunit 1                 | Upregulated |
| A_23_P851 | 0.001359 | 0.00015  | 1.43 | ARMCX5       | armadillo repeat containing, X-linked 5                                 | Upregulated |
| A_23_P206 | 0.001398 | 0.000158 | 1.43 | DNAJA4       | DnaJ (Hsp40) homolog, subfamily A, member 4                             | Upregulated |
| A_24_P723 | 0.001404 | 0.00016  | 1.43 | RBAK         | RB-associated KRAB zinc finger                                          | Upregulated |
| A_33_P324 | 0.001458 | 0.000171 | 1.43 | PANK3        | pantothenate kinase 3                                                   | Upregulated |
| A_21_P000 | 0.001499 | 0.00018  | 1.43 | SNORA5B      | small nucleolar RNA, H/ACA box 5B                                       | Upregulated |
| A_23_P140 | 0.001522 | 0.000185 | 1.43 | FBXL3        | F-box and leucine-rich repeat protein 3                                 | Upregulated |
| A_32_P685 | 0.002113 | 0.000331 | 1.43 | ZDBF2        | zinc finger, DBF-type containing 2                                      | Upregulated |
| A_33_P333 | 0.002184 | 0.00035  | 1.43 | LOC1019278   | uncharacterized LOC101927838                                            | Upregulated |
| A_23_P709 | 0.003175 | 0.000622 | 1.43 | UMAD1        | UBAP1-MVB12-associated (UMA) domain containing 1                        | Upregulated |
| A_33_P339 | 0.003461 | 0.000706 | 1.43 | C2orf50      | chromosome 2 open reading frame 50                                      | Upregulated |
| A_21_P001 | 0.005389 | 0.00136  | 1.43 | lnc-ABHD12B  | lnc-ABHD12B-5:1                                                         | Upregulated |
| A_33_P333 | 0.008161 | 0.00243  | 1.43 | PDE1C        | phosphodiesterase 1C, calmodulin-dependent 70kDa                        | Upregulated |
| A_33_P326 | 0.008344 | 0.00251  | 1.43 | RHEBL1       | Ras homolog enriched in brain like 1                                    | Upregulated |
| A_33_P331 | 0.012521 | 0.00427  | 1.43 | FBXL17       | F-box and leucine-rich repeat protein 17                                | Upregulated |
| A_23_P214 | 0.015734 | 0.00575  | 1.43 | CNR1         | cannabinoid receptor 1 (brain)                                          | Upregulated |
| A_23_P494 | 0.015734 | 0.00575  | 1.43 | LOC81691     | exonuclease NEF-sp                                                      | Upregulated |
| A_22_P000 | 0.066456 | 0.0337   | 1.43 | lnc-COX17-1  | lnc-COX17-1:1                                                           | Upregulated |
| A_21_P000 | 0.001157 | 0.00011  | 1.42 | lnc-CADM2-5  | lnc-CADM2-5:1                                                           | Upregulated |
| A_23_P412 | 0.001157 | 0.00011  | 1.42 | TGM4         | transglutaminase 4                                                      | Upregulated |
| A_24_P332 | 0.001211 | 0.000121 | 1.42 | RPL7L1       | ribosomal protein L7-like 1                                             | Upregulated |
| A_33_P335 | 0.001227 | 0.000124 | 1.42 | PPAPDC1B     | phosphatidic acid phosphatase type 2 domain containing 1B               | Upregulated |
| A_23_P256 | 0.001263 | 0.000132 | 1.42 | GOLGA4       | golgin A4                                                               | Upregulated |
| A_33_P321 | 0.001479 | 0.000176 | 1.42 | ZNF777       | zinc finger protein 777                                                 | Upregulated |
| A_24_P282 | 0.001541 | 0.000189 | 1.42 | SSR2         | signal sequence receptor, beta (translocon-associated protein beta)     | Upregulated |
| A_23_P202 | 0.001604 | 0.000202 | 1.42 | MAP2K1       | mitogen-activated protein kinase kinase 1                               | Upregulated |
| A_23_P320 | 0.001626 | 0.000208 | 1.42 | BUB3         | BUB3 mitotic checkpoint protein                                         | Upregulated |
| A_33_P328 | 0.00188  | 0.000269 | 1.42 | SMCO1        | single-pass membrane protein with coiled-coil domains 1                 | Upregulated |
| A_24_P185 | 0.002179 | 0.000349 | 1.42 | DMD          | dystrophin                                                              | Upregulated |
| A_33_P335 | 0.002535 | 0.000439 | 1.42 | HSPB1        | heat shock 27kDa protein 1                                              | Upregulated |
| A_23_P141 | 0.00264  | 0.000467 | 1.42 | C17orf49     | chromosome 17 open reading frame 49                                     | Upregulated |



|           |          |          |      |                |                                                      |             |
|-----------|----------|----------|------|----------------|------------------------------------------------------|-------------|
| A_23_P423 | 0.003001 | 0.000568 | 1.42 | CREB3          | cAMP responsive element binding protein 3            | Upregulated |
| A_33_P336 | 0.003474 | 0.000709 | 1.42 | AGPAT2         | 1-acylglycerol-3-phosphate O-acyltransferase 2       | Upregulated |
| A_22_P000 | 0.004746 | 0.00113  | 1.42 | OXCT1-AS1      | OXCT1 antisense RNA 1                                | Upregulated |
| A_23_P218 | 0.005135 | 0.00126  | 1.42 | POLQ           | polymerase (DNA directed), theta                     | Upregulated |
| A_33_P329 | 0.006015 | 0.00159  | 1.42 | ZNF550         | zinc finger protein 550                              | Upregulated |
| A_23_P126 | 0.006861 | 0.00191  | 1.42 | TNFSF4         | tumor necrosis factor (ligand) superfamily, member 4 | Upregulated |
| A_23_P891 | 0.008774 | 0.00268  | 1.42 | EXOC7          | exocyst complex component 7                          | Upregulated |
| A_23_P357 | 0.008875 | 0.00272  | 1.42 | RPS6KA4        | ribosomal protein S6 kinase, 90kDa, polypeptide 4    | Upregulated |
| A_24_P701 | 0.009801 | 0.00311  | 1.42 | BVES-AS1       | BVES antisense RNA 1                                 | Upregulated |
| A_33_P322 | 0.015865 | 0.00581  | 1.42 | PRH2           | proline-rich protein HaeIII subfamily 2              | Upregulated |
| A_21_P001 | 0.016021 | 0.00589  | 1.42 | LINC00539      | long intergenic non-protein coding RNA 539           | Upregulated |
| A_24_P332 | 0.022982 | 0.00923  | 1.42 | JAKMIP3        | Janus kinase and microtubule interacting protein 3   | Upregulated |
| A_21_P000 | 0.025809 | 0.0107   | 1.42 | LOC1019287     | uncharacterized LOC101928739                         | Upregulated |
| A_33_P324 | 0.027568 | 0.0116   | 1.42 | PIBF1          | progesterone immunomodulatory binding factor 1       | Upregulated |
| A_21_P001 | 0.034251 | 0.0152   | 1.42 | XLOC_I2_004843 |                                                      | Upregulated |
| A_19_P003 | 0.034839 | 0.0155   | 1.42 | LINC00963      | long intergenic non-protein coding RNA 963           | Upregulated |
| A_33_P324 | 0.042922 | 0.02     | 1.42 | NRK            | Nik related kinase                                   | Upregulated |
| A_33_P337 | 0.050416 | 0.0242   | 1.42 | TDRD1          | tudor domain containing 1                            | Upregulated |
| A_33_P344 | 0.00118  | 0.000115 | 1.41 | PPP6R3         | protein phosphatase 6, regulatory subunit 3          | Upregulated |
| A_23_P117 | 0.001203 | 0.00012  | 1.41 | PRDM4          | PR domain containing 4                               | Upregulated |
| A_23_P209 | 0.00121  | 0.000121 | 1.41 | CD22           | CD22 molecule                                        | Upregulated |
| A_21_P000 | 0.001242 | 0.000127 | 1.41 | SNORA5A        | small nucleolar RNA, H/ACA box 5A                    | Upregulated |
| A_22_P000 | 0.00129  | 0.000136 | 1.41 | lnc-SLC25A3    | lnc-SLC25A37-1:1                                     | Upregulated |
| A_33_P326 | 0.001342 | 0.000147 | 1.41 | PGAM1          | phosphoglycerate mutase 1 (brain)                    | Upregulated |
| A_23_P121 | 0.001398 | 0.000158 | 1.41 | GBE1           | glucan (1,4-alpha-), branching enzyme 1              | Upregulated |
| A_19_P008 | 0.001448 | 0.000169 | 1.41 | PPA1           | pyrophosphatase (inorganic) 1                        | Upregulated |
| A_33_P334 | 0.0015   | 0.000181 | 1.41 | EDRF1          | erythroid differentiation regulatory factor 1        | Upregulated |
| A_23_P105 | 0.001693 | 0.000223 | 1.41 | CHPT1          | choline phosphotransferase 1                         | Upregulated |
| A_32_P179 | 0.001779 | 0.000244 | 1.41 | TOB2           | transducer of ERBB2, 2                               | Upregulated |
| A_33_P329 | 0.002005 | 0.000301 | 1.41 | DEGS1          | delta(4)-desaturase, sphingolipid 1                  | Upregulated |
| A_33_P356 | 0.002112 | 0.00033  | 1.41 | MAD1L1         | MAD1 mitotic arrest deficient-like 1 (yeast)         | Upregulated |
| A_23_P485 | 0.002113 | 0.000331 | 1.41 | C14orf93       | chromosome 14 open reading frame 93                  | Upregulated |
| A_33_P328 | 0.002243 | 0.000366 | 1.41 | POLL           | polymerase (DNA directed), lambda                    | Upregulated |
| A_33_P321 | 0.002559 | 0.000445 | 1.41 | KLK3           | kallikrein-related peptidase 3                       | Upregulated |
| A_33_P329 | 0.005753 | 0.00149  | 1.41 | DDRGK1         | DDRGK domain containing 1                            | Upregulated |
| A_22_P000 | 0.014369 | 0.00511  | 1.41 | lnc-AVEN-1     | lnc-AVEN-1:1                                         | Upregulated |
| A_33_P333 | 0.01486  | 0.00535  | 1.41 | BTN2A1         | butyrophilin, subfamily 2, member A1                 | Upregulated |

|           |          |          |      |             |                                                                             |             |
|-----------|----------|----------|------|-------------|-----------------------------------------------------------------------------|-------------|
| A_23_P205 | 0.021173 | 0.00833  | 1.41 | DDHD1       | DDHD domain containing 1                                                    | Upregulated |
| A_23_P122 | 0.023982 | 0.00975  | 1.41 | C5orf30     | chromosome 5 open reading frame 30                                          | Upregulated |
| A_32_P159 | 0.033974 | 0.015    | 1.41 | ASIC2       | acid sensing (proton gated) ion channel 2                                   | Upregulated |
| A_24_P400 | 0.001208 | 0.00012  | 1.4  | GET4        | golgi to ER traffic protein 4 homolog (S. cerevisiae)                       | Upregulated |
| A_24_P365 | 0.001211 | 0.000121 | 1.4  | TSPAN33     | tetraspanin 33                                                              | Upregulated |
| A_23_P768 | 0.00124  | 0.000126 | 1.4  | NGDN        | neuroguidin, EIF4E binding protein                                          | Upregulated |
| A_33_P340 | 0.001591 | 0.000199 | 1.4  | GM2A        | GM2 ganglioside activator                                                   | Upregulated |
| A_33_P335 | 0.001635 | 0.00021  | 1.4  | USP37       | ubiquitin specific peptidase 37                                             | Upregulated |
| A_24_P285 | 0.001772 | 0.000242 | 1.4  | DGUOK       | deoxyguanosine kinase                                                       | Upregulated |
| A_22_P000 | 0.001776 | 0.000243 | 1.4  | TMPO-AS1    | TMPO antisense RNA 1                                                        | Upregulated |
| A_23_P584 | 0.00183  | 0.000257 | 1.4  | MGAT1       | mannosyl (alpha-1,3-)-glycoprotein beta-1,2-N-acetylglucosaminyltransferase | Upregulated |
| A_33_P337 | 0.002203 | 0.000355 | 1.4  | SGTB        | small glutamine-rich tetratricopeptide repeat (TPR)-containing, beta        | Upregulated |
| A_23_P664 | 0.00239  | 0.000401 | 1.4  | MED9        | mediator complex subunit 9                                                  | Upregulated |
| A_23_P214 | 0.002597 | 0.000456 | 1.4  | COL10A1     | collagen, type X, alpha 1                                                   | Upregulated |
| A_33_P335 | 0.002707 | 0.000485 | 1.4  | IGBP1       | immunoglobulin (CD79A) binding protein 1                                    | Upregulated |
| A_23_P352 | 0.004554 | 0.00106  | 1.4  | RCAN3       | RCAN family member 3                                                        | Upregulated |
| A_21_P000 | 0.005261 | 0.00131  | 1.4  | lnc-NUDT7-1 | lnc-NUDT7-1:1                                                               | Upregulated |
| A_33_P369 | 0.006321 | 0.00171  | 1.4  | LOC283485   | uncharacterized LOC283485                                                   | Upregulated |
| A_24_P532 | 0.006348 | 0.00172  | 1.4  | CPD         | carboxypeptidase D                                                          | Upregulated |
| A_22_P000 | 0.006888 | 0.00192  | 1.4  | PTOV1-AS1   | PTOV1 antisense RNA 1                                                       | Upregulated |
| A_22_P000 | 0.010139 | 0.00326  | 1.4  | lnc-API5-1  | lnc-API5-1:1                                                                | Upregulated |
| A_33_P333 | 0.014014 | 0.00494  | 1.4  | ARMCX6      | armadillo repeat containing, X-linked 6                                     | Upregulated |
| A_23_P302 | 0.017396 | 0.00655  | 1.4  | SRD5A1      | steroid-5-alpha-reductase, alpha polypeptide 1 (3-oxo-5 alpha-steroid di    | Upregulated |
| A_32_P150 | 0.021642 | 0.00856  | 1.4  | C17orf100   | chromosome 17 open reading frame 100                                        | Upregulated |
| A_22_P000 | 0.024408 | 0.00999  | 1.4  | lnc-CNR1-1  | lnc-CNR1-1:2                                                                | Upregulated |
| A_33_P327 | 0.029372 | 0.0126   | 1.4  | PHLPP2      | PH domain and leucine rich repeat protein phosphatase 2                     | Upregulated |
| A_23_P127 | 0.054093 | 0.0264   | 1.4  | HYLS1       | hydroletharus syndrome 1                                                    | Upregulated |
| A_21_P000 | 0.090554 | 0.0492   | 1.4  | lnc-CD83-2  | lnc-CD83-2:1                                                                | Upregulated |
| A_23_P136 | 0.001232 | 0.000125 | 1.39 | IMPAD1      | inositol monophosphatase domain containing 1                                | Upregulated |
| A_32_P204 | 0.001347 | 0.000147 | 1.39 | FABP5       | fatty acid binding protein 5 (psoriasis-associated)                         | Upregulated |
| A_23_P117 | 0.001405 | 0.00016  | 1.39 | KIAA0101    | KIAA0101                                                                    | Upregulated |
| A_33_P330 | 0.001569 | 0.000195 | 1.39 | C1orf52     | chromosome 1 open reading frame 52                                          | Upregulated |
| A_24_P590 | 0.001753 | 0.000237 | 1.39 | RRN3        | RRN3 RNA polymerase I transcription factor homolog (S. cerevisiae)          | Upregulated |
| A_23_P944 | 0.001934 | 0.000282 | 1.39 | PDCD1LG2    | programmed cell death 1 ligand 2                                            | Upregulated |
| A_23_P314 | 0.002097 | 0.000326 | 1.39 | BMI1        | BMI1 proto-oncogene, polycomb ring finger                                   | Upregulated |
| A_23_P208 | 0.002211 | 0.000356 | 1.39 | CLEC4M      | C-type lectin domain family 4, member M                                     | Upregulated |
| A_23_P302 | 0.00299  | 0.000565 | 1.39 | HMHB1       | histocompatibility (minor) HB-1                                             | Upregulated |

|           |          |          |      |              |                                                               |             |
|-----------|----------|----------|------|--------------|---------------------------------------------------------------|-------------|
| A_33_P333 | 0.003458 | 0.000705 | 1.39 | SP1          | Sp1 transcription factor                                      | Upregulated |
| A_22_P000 | 0.006239 | 0.00168  | 1.39 | lnc-ENAH-1   | lnc-ENAH-1:1                                                  | Upregulated |
| A_22_P000 | 0.010952 | 0.00358  | 1.39 | LOC1019277   | uncharacterized LOC101927740                                  | Upregulated |
| A_22_P000 | 0.013454 | 0.00469  | 1.39 | SLC50A1      | solute carrier family 50 (sugar efflux transporter), member 1 | Upregulated |
| A_33_P322 | 0.015611 | 0.0057   | 1.39 | CCR10        | chemokine (C-C motif) receptor 10                             | Upregulated |
| A_21_P000 | 0.072667 | 0.0375   | 1.39 | LINC00485    | long intergenic non-protein coding RNA 485                    | Upregulated |
| A_33_P340 | 0.001242 | 0.000127 | 1.38 | TMEM120B     | transmembrane protein 120B                                    | Upregulated |
| A_23_P773 | 0.001435 | 0.000165 | 1.38 | CETN3        | centrin, EF-hand protein, 3                                   | Upregulated |
| A_23_P257 | 0.001435 | 0.000166 | 1.38 | TMEM117      | transmembrane protein 117                                     | Upregulated |
| A_23_P101 | 0.001583 | 0.000198 | 1.38 | EML2         | echinoderm microtubule associated protein like 2              | Upregulated |
| A_23_P330 | 0.001594 | 0.0002   | 1.38 | MAF1         | MAF1 homolog (S. cerevisiae)                                  | Upregulated |
| A_33_P333 | 0.001749 | 0.000236 | 1.38 | HUS1         | HUS1 checkpoint homolog (S. pombe)                            | Upregulated |
| A_24_P102 | 0.00176  | 0.000239 | 1.38 | DNAJB2       | DnaJ (Hsp40) homolog, subfamily B, member 2                   | Upregulated |
| A_24_P880 | 0.001839 | 0.000259 | 1.38 | C8orf33      | chromosome 8 open reading frame 33                            | Upregulated |
| A_23_P100 | 0.002072 | 0.00032  | 1.38 | VKORC1       | vitamin K epoxide reductase complex, subunit 1                | Upregulated |
| A_22_P000 | 0.002117 | 0.000332 | 1.38 | lnc-CTDSPL2  | lnc-CTDSPL2-2:1                                               | Upregulated |
| A_23_P118 | 0.002603 | 0.000458 | 1.38 | C17orf62     | chromosome 17 open reading frame 62                           | Upregulated |
| A_19_P003 | 0.002992 | 0.000566 | 1.38 | LOC145474    | uncharacterized LOC145474                                     | Upregulated |
| A_33_P320 | 0.003548 | 0.000733 | 1.38 | IARS         | isoleucyl-tRNA synthetase                                     | Upregulated |
| A_21_P000 | 0.005415 | 0.00137  | 1.38 | lnc-HPDL-1   | lnc-HPDL-1:1                                                  | Upregulated |
| A_22_P000 | 0.006474 | 0.00177  | 1.38 | lnc-STAT1-2  | lnc-STAT1-2:1                                                 | Upregulated |
| A_23_P156 | 0.008574 | 0.0026   | 1.38 | STX11        | syntaxin 11                                                   | Upregulated |
| A_22_P000 | 0.009631 | 0.00304  | 1.38 | lnc-ZNF667-1 | lnc-ZNF667-1:1                                                | Upregulated |
| A_23_P128 | 0.010107 | 0.00324  | 1.38 | RNF34        | ring finger protein 34, E3 ubiquitin protein ligase           | Upregulated |
| A_22_P000 | 0.010598 | 0.00344  | 1.38 | lnc-SPAG1-4  | lnc-SPAG1-4:2                                                 | Upregulated |
| A_33_P321 | 0.012467 | 0.00425  | 1.38 | METTL6       | methyltransferase like 6                                      | Upregulated |
| A_21_P001 | 0.01384  | 0.00486  | 1.38 | LINC01503    | long intergenic non-protein coding RNA 1503                   | Upregulated |
| A_33_P337 | 0.021475 | 0.00848  | 1.38 | LOC1001312   | uncharacterized LOC100131242                                  | Upregulated |
| A_21_P001 | 0.025049 | 0.0103   | 1.38 | MUC19        | mucin 19, oligomeric                                          | Upregulated |
| A_23_P379 | 0.028169 | 0.0119   | 1.38 | MAPK3        | mitogen-activated protein kinase 3                            | Upregulated |
| A_22_P000 | 0.037267 | 0.0168   | 1.38 | lnc-TSPYL6-1 | lnc-TSPYL6-1:1                                                | Upregulated |
| A_33_P331 | 0.045877 | 0.0217   | 1.38 | OR5C1        | olfactory receptor, family 5, subfamily C, member 1           | Upregulated |
| A_23_P700 | 0.001222 | 0.000123 | 1.37 | PFDN1        | prefoldin subunit 1                                           | Upregulated |
| A_23_P385 | 0.001241 | 0.000127 | 1.37 | ARL8B        | ADP-ribosylation factor-like 8B                               | Upregulated |
| A_24_P353 | 0.001398 | 0.000158 | 1.37 | SLAMF7       | SLAM family member 7                                          | Upregulated |
| A_33_P340 | 0.001453 | 0.000171 | 1.37 | GTF3C4       | general transcription factor IIIC, polypeptide 4, 90kDa       | Upregulated |
| A_24_P661 | 0.001474 | 0.000174 | 1.37 | STAG2        | stromal antigen 2                                             | Upregulated |

|           |          |          |      |             |                                                                         |             |
|-----------|----------|----------|------|-------------|-------------------------------------------------------------------------|-------------|
| A_23_P247 | 0.001537 | 0.000188 | 1.37 | OSBP        | oxysterol binding protein                                               | Upregulated |
| A_23_P108 | 0.001611 | 0.000204 | 1.37 | YPEL5       | yippee-like 5 (Drosophila)                                              | Upregulated |
| A_33_P321 | 0.0017   | 0.000226 | 1.37 | PANK3       | pantothenate kinase 3                                                   | Upregulated |
| A_32_P193 | 0.001754 | 0.000237 | 1.37 | FMNL2       | formin-like 2                                                           | Upregulated |
| A_23_P672 | 0.001831 | 0.000257 | 1.37 | PKN1        | protein kinase N1                                                       | Upregulated |
| A_33_P332 | 0.001925 | 0.00028  | 1.37 | ATXN7       | ataxin 7                                                                | Upregulated |
| A_33_P324 | 0.002337 | 0.000387 | 1.37 | MUC19       | mucin 19, oligomeric                                                    | Upregulated |
| A_23_P258 | 0.00248  | 0.000424 | 1.37 | MANBA       | mannosidase, beta A, lysosomal                                          | Upregulated |
| A_33_P321 | 0.00264  | 0.000467 | 1.37 | IMPDH2      | IMP (inosine 5'-monophosphate) dehydrogenase 2                          | Upregulated |
| A_24_P509 | 0.006118 | 0.00163  | 1.37 | TRIM11      | tripartite motif containing 11                                          | Upregulated |
| A_32_P198 | 0.018743 | 0.00717  | 1.37 | lnc-EPHA1-1 | lnc-EPHA1-1:1                                                           | Upregulated |
| A_22_P000 | 0.018801 | 0.0072   | 1.37 | lnc-CLGN-2  | lnc-CLGN-2:1                                                            | Upregulated |
| A_23_P121 | 0.026279 | 0.011    | 1.37 | PRSS12      | protease, serine, 12 (neurotrypsin, motopsin)                           | Upregulated |
| A_21_P001 | 0.026279 | 0.011    | 1.37 | ZDHC11      | zinc finger, DHHC-type containing 11                                    | Upregulated |
| A_24_P348 | 0.044464 | 0.0208   | 1.37 | LRRC8E      | leucine rich repeat containing 8 family, member E                       | Upregulated |
| A_24_P935 | 0.04772  | 0.0227   | 1.37 | ADCY9       | adenylate cyclase 9                                                     | Upregulated |
| A_23_P433 | 0.051162 | 0.0247   | 1.37 | SPG7        | spastic paraplegia 7 (pure and complicated autosomal recessive)         | Upregulated |
| A_21_P000 | 0.064134 | 0.0323   | 1.37 | lnc-NPAT-1  | lnc-NPAT-1:1                                                            | Upregulated |
| A_33_P328 | 0.001243 | 0.000128 | 1.36 | RMND5A      | required for meiotic nuclear division 5 homolog A (S. cerevisiae)       | Upregulated |
| A_24_P196 | 0.001298 | 0.000138 | 1.36 | KMT2E       | lysine (K)-specific methyltransferase 2E                                | Upregulated |
| A_23_P157 | 0.001373 | 0.000152 | 1.36 | MRPS33      | mitochondrial ribosomal protein S33                                     | Upregulated |
| A_33_P332 | 0.001398 | 0.000158 | 1.36 | GAS5        | growth arrest-specific 5 (non-protein coding)                           | Upregulated |
| A_24_P823 | 0.001478 | 0.000176 | 1.36 | HSP90AB1    | heat shock protein 90kDa alpha (cytosolic), class B member 1            | Upregulated |
| A_23_P205 | 0.001484 | 0.000178 | 1.36 | PSEN1       | presenilin 1                                                            | Upregulated |
| A_23_P163 | 0.001563 | 0.000194 | 1.36 | MTHFS       | 5,10-methenyltetrahydrofolate synthetase (5-formyltetrahydrofolate cycl | Upregulated |
| A_33_P325 | 0.001884 | 0.000269 | 1.36 | ZNF451      | zinc finger protein 451                                                 | Upregulated |
| A_24_P276 | 0.002464 | 0.000419 | 1.36 | PPT1        | palmitoyl-protein thioesterase 1                                        | Upregulated |
| A_32_P169 | 0.00275  | 0.000497 | 1.36 | ALG1        | ALG1, chitobiosyldiphosphodolichol beta-mannosyltransferase             | Upregulated |
| A_23_P632 | 0.003291 | 0.000656 | 1.36 | POGZ        | pogo transposable element with ZNF domain                               | Upregulated |
| A_23_P327 | 0.007634 | 0.00222  | 1.36 | KIAA0232    | KIAA0232                                                                | Upregulated |
| A_24_P305 | 0.00852  | 0.00258  | 1.36 | SMS         | spermine synthase                                                       | Upregulated |
| A_23_P401 | 0.009741 | 0.00308  | 1.36 | COL9A3      | collagen, type IX, alpha 3                                              | Upregulated |
| A_33_P324 | 0.010112 | 0.00325  | 1.36 | DIAPH1      | diaphanous-related formin 1                                             | Upregulated |
| A_24_P283 | 0.011042 | 0.00363  | 1.36 | NABP2       | nucleic acid binding protein 2                                          | Upregulated |
| A_32_P137 | 0.011404 | 0.00379  | 1.36 | TRIM27      | tripartite motif containing 27                                          | Upregulated |
| A_24_P989 | 0.012763 | 0.00438  | 1.36 | PFKM        | phosphofructokinase, muscle                                             | Upregulated |
| A_33_P338 | 0.001298 | 0.000138 | 1.35 | EEF2KMT     | eukaryotic elongation factor 2 lysine methyltransferase                 | Upregulated |

|           |          |          |      |                |                                                                       |             |
|-----------|----------|----------|------|----------------|-----------------------------------------------------------------------|-------------|
| A_23_P145 | 0.001347 | 0.000148 | 1.35 | HSP90AB1       | heat shock protein 90kDa alpha (cytosolic), class B member 1          | Upregulated |
| A_33_P330 | 0.001397 | 0.000157 | 1.35 | CPSF7          | cleavage and polyadenylation specific factor 7, 59kDa                 | Upregulated |
| A_33_P341 | 0.00141  | 0.000161 | 1.35 | SLC24A1        | solute carrier family 24 (sodium/potassium/calcium exchanger), member | Upregulated |
| A_33_P321 | 0.001479 | 0.000176 | 1.35 | POLR2A         | polymerase (RNA) II (DNA directed) polypeptide A, 220kDa              | Upregulated |
| A_32_P698 | 0.001517 | 0.000184 | 1.35 | BEX5           | brain expressed, X-linked 5                                           | Upregulated |
| A_22_P000 | 0.00163  | 0.000209 | 1.35 | lnc-PHYHD1-    | lnc-PHYHD1-1:1                                                        | Upregulated |
| A_22_P000 | 0.001808 | 0.00025  | 1.35 | lnc-SLC12A7-   | lnc-SLC12A7-1:2                                                       | Upregulated |
| A_32_P126 | 0.001944 | 0.000284 | 1.35 | E2F6           | E2F transcription factor 6                                            | Upregulated |
| A_24_P309 | 0.00196  | 0.00029  | 1.35 | SNN            | stannin                                                               | Upregulated |
| A_19_P003 | 0.002571 | 0.000449 | 1.35 | LOC1027251     | uncharacterized LOC102725166                                          | Upregulated |
| A_33_P332 | 0.002662 | 0.000472 | 1.35 | RRM2B          | ribonucleotide reductase M2 B (TP53 inducible)                        | Upregulated |
| A_33_P330 | 0.004565 | 0.00106  | 1.35 | ZFAND4         | zinc finger, AN1-type domain 4                                        | Upregulated |
| A_33_P321 | 0.011063 | 0.00364  | 1.35 | ATAD2          | ATPase family, AAA domain containing 2                                | Upregulated |
| A_33_P321 | 0.011582 | 0.00388  | 1.35 | ZC3H12A        | zinc finger CCCH-type containing 12A                                  | Upregulated |
| A_22_P000 | 0.012101 | 0.00409  | 1.35 | CYB5B          | cytochrome b5 type B (outer mitochondrial membrane)                   | Upregulated |
| A_33_P325 | 0.019729 | 0.00764  | 1.35 | PAN3           | PAN3 poly(A) specific ribonuclease subunit                            | Upregulated |
| A_23_P250 | 0.034507 | 0.0153   | 1.35 | BRPF1          | bromodomain and PHD finger containing, 1                              | Upregulated |
| A_33_P337 | 0.042114 | 0.0195   | 1.35 | FAM98B         | family with sequence similarity 98, member B                          | Upregulated |
| A_23_P184 | 0.001295 | 0.000137 | 1.34 | TIMMDC1        | translocase of inner mitochondrial membrane domain containing 1       | Upregulated |
| A_32_P683 | 0.001337 | 0.000145 | 1.34 | C5orf51        | chromosome 5 open reading frame 51                                    | Upregulated |
| A_23_P395 | 0.001375 | 0.000153 | 1.34 | PWP1           | PWP1 homolog (S. cerevisiae)                                          | Upregulated |
| A_23_P191 | 0.001376 | 0.000153 | 1.34 | TTC1           | tetratricopeptide repeat domain 1                                     | Upregulated |
| A_33_P324 | 0.001386 | 0.000155 | 1.34 | PIGX           | phosphatidylinositol glycan anchor biosynthesis, class X              | Upregulated |
| A_32_P148 | 0.001469 | 0.000174 | 1.34 | SNRPD1         | small nuclear ribonucleoprotein D1 polypeptide 16kDa                  | Upregulated |
| A_23_P302 | 0.001479 | 0.000176 | 1.34 | FAM174A        | family with sequence similarity 174, member A                         | Upregulated |
| A_21_P001 | 0.001481 | 0.000177 | 1.34 | XLOC_I2_015213 |                                                                       | Upregulated |
| A_33_P325 | 0.001531 | 0.000187 | 1.34 | FAM21C         | family with sequence similarity 21, member C                          | Upregulated |
| A_33_P321 | 0.001605 | 0.000203 | 1.34 | IL18R1         | interleukin 18 receptor 1                                             | Upregulated |
| A_24_P990 | 0.001854 | 0.000263 | 1.34 | IPO5           | importin 5                                                            | Upregulated |
| A_22_P000 | 0.002544 | 0.000442 | 1.34 | lnc-S100A13-   | lnc-S100A13-1:1                                                       | Upregulated |
| A_23_P362 | 0.002882 | 0.000534 | 1.34 | SLC25A33       | solute carrier family 25 (pyrimidine nucleotide carrier), member 33   | Upregulated |
| A_22_P000 | 0.003054 | 0.000583 | 1.34 | lnc-USP8-1     | lnc-USP8-1:1                                                          | Upregulated |
| A_23_P170 | 0.003974 | 0.000865 | 1.34 | CHCHD7         | coiled-coil-helix-coiled-coil-helix domain containing 7               | Upregulated |
| A_23_P977 | 0.004221 | 0.000948 | 1.34 | ACBD5          | acyl-CoA binding domain containing 5                                  | Upregulated |
| A_19_P008 | 0.004467 | 0.00103  | 1.34 | BMPR1A         | bone morphogenetic protein receptor, type IA                          | Upregulated |
| A_23_P521 | 0.006304 | 0.0017   | 1.34 | TBCE           | tubulin folding cofactor E                                            | Upregulated |
| A_21_P000 | 0.009878 | 0.00314  | 1.34 | lnc-CTAGE5-    | lnc-CTAGE5-1:1                                                        | Upregulated |

|           |          |          |      |              |                                                                    |             |
|-----------|----------|----------|------|--------------|--------------------------------------------------------------------|-------------|
| A_33_P326 | 0.011099 | 0.00365  | 1.34 | ZNF546       | zinc finger protein 546                                            | Upregulated |
| A_22_P000 | 0.011787 | 0.00396  | 1.34 | LOC1001290   | uncharacterized LOC100129083                                       | Upregulated |
| A_33_P328 | 0.014447 | 0.00515  | 1.34 | ANKRD20A9f   | ankyrin repeat domain 20 family, member A9, pseudogene             | Upregulated |
| A_32_P352 | 0.02519  | 0.0104   | 1.34 | LOC650293    | seven transmembrane helix receptor                                 | Upregulated |
| A_22_P000 | 0.027701 | 0.0117   | 1.34 | USP12-AS1    | USP12 antisense RNA 1                                              | Upregulated |
| A_33_P324 | 0.031087 | 0.0135   | 1.34 | LOC1005057   | uncharacterized LOC100505739                                       | Upregulated |
| A_23_P696 | 0.033521 | 0.0148   | 1.34 | SEC24B       | SEC24 family member B                                              | Upregulated |
| A_22_P000 | 0.040455 | 0.0186   | 1.34 | lnc-ACOT9-1  | lnc-ACOT9-1:1                                                      | Upregulated |
| A_21_P001 | 0.048807 | 0.0233   | 1.34 | LOC1005060   | uncharacterized LOC100506023                                       | Upregulated |
| A_21_P000 | 0.050765 | 0.0244   | 1.34 | BEND7        | BEN domain containing 7                                            | Upregulated |
| A_33_P335 | 0.063294 | 0.0318   | 1.34 | KIF22        | kinesin family member 22                                           | Upregulated |
| A_33_P377 | 0.001316 | 0.000142 | 1.33 | SERAC1       | serine active site containing 1                                    | Upregulated |
| A_33_P334 | 0.001386 | 0.000155 | 1.33 | HSPH1        | heat shock 105kDa/110kDa protein 1                                 | Upregulated |
| A_23_P110 | 0.001469 | 0.000174 | 1.33 | SKIV2L2      | superkiller viralicidic activity 2-like 2 (S. cerevisiae)          | Upregulated |
| A_33_P322 | 0.002113 | 0.00033  | 1.33 | UBE2E3       | ubiquitin-conjugating enzyme E2E 3                                 | Upregulated |
| A_33_P321 | 0.002241 | 0.000365 | 1.33 | PAG1         | phosphoprotein membrane anchor with glycosphingolipid microdomains | Upregulated |
| A_23_P492 | 0.002951 | 0.000553 | 1.33 | C16orf87     | chromosome 16 open reading frame 87                                | Upregulated |
| A_33_P359 | 0.003355 | 0.000675 | 1.33 | PAPPA        | pregnancy-associated plasma protein A, pappalysin 1                | Upregulated |
| A_24_P202 | 0.004389 | 0.001    | 1.33 | ITPKC        | inositol-trisphosphate 3-kinase C                                  | Upregulated |
| A_33_P335 | 0.004443 | 0.00102  | 1.33 | ZNF416       | zinc finger protein 416                                            | Upregulated |
| A_23_P808 | 0.004454 | 0.00103  | 1.33 | FYTTD1       | forty-two-three domain containing 1                                | Upregulated |
| A_22_P000 | 0.005038 | 0.00123  | 1.33 | lnc-ADAMTS1  | lnc-ADAMTS18-6:1                                                   | Upregulated |
| A_23_P131 | 0.006324 | 0.00171  | 1.33 | ACSBG2       | acyl-CoA synthetase bubblegum family member 2                      | Upregulated |
| A_23_P214 | 0.008186 | 0.00244  | 1.33 | PPARD        | peroxisome proliferator-activated receptor delta                   | Upregulated |
| A_33_P325 | 0.016121 | 0.00594  | 1.33 | ZNF134       | zinc finger protein 134                                            | Upregulated |
| A_21_P001 | 0.016713 | 0.00623  | 1.33 | LOC441124    | uncharacterized LOC441124                                          | Upregulated |
| A_23_P501 | 0.019666 | 0.00761  | 1.33 | ASB4         | ankyrin repeat and SOCS box containing 4                           | Upregulated |
| A_23_P132 | 0.031217 | 0.0136   | 1.33 | GLT8D1       | glycosyltransferase 8 domain containing 1                          | Upregulated |
| A_21_P000 | 0.031596 | 0.0137   | 1.33 | LOC1027235   | uncharacterized LOC102723525                                       | Upregulated |
| A_32_P853 | 0.039434 | 0.0181   | 1.33 | ST20-AS1     | ST20 antisense RNA 1                                               | Upregulated |
| A_22_P000 | 0.04551  | 0.0215   | 1.33 | lnc-KIAA1598 | lnc-KIAA1598-1:1                                                   | Upregulated |
| A_23_P149 | 0.053536 | 0.026    | 1.33 | PANK4        | pantothenate kinase 4                                              | Upregulated |
| A_21_P001 | 0.076749 | 0.04     | 1.33 | lnc-CD93-1   | lnc-CD93-1:1                                                       | Upregulated |
| A_23_P604 | 0.001314 | 0.000141 | 1.32 | ZNF462       | zinc finger protein 462                                            | Upregulated |
| A_33_P338 | 0.001369 | 0.000152 | 1.32 | FAM27B       | family with sequence similarity 27, member B                       | Upregulated |
| A_23_P824 | 0.001621 | 0.000206 | 1.32 | PUS7         | pseudouridylate synthase 7 (putative)                              | Upregulated |
| A_33_P334 | 0.001657 | 0.000215 | 1.32 | TTC5         | tetratricopeptide repeat domain 5                                  | Upregulated |

|           |          |          |      |                |                                                               |             |
|-----------|----------|----------|------|----------------|---------------------------------------------------------------|-------------|
| A_23_P130 | 0.001694 | 0.000224 | 1.32 | AURKB          | aurora kinase B                                               | Upregulated |
| A_23_P109 | 0.001753 | 0.000237 | 1.32 | PSMD6          | proteasome (prosome, macropain) 26S subunit, non-ATPase, 6    | Upregulated |
| A_23_P604 | 0.001784 | 0.000245 | 1.32 | UBAP2          | ubiquitin associated protein 2                                | Upregulated |
| A_33_P330 | 0.001833 | 0.000258 | 1.32 | LOC1001293     | uncharacterized LOC100129363                                  | Upregulated |
| A_33_P334 | 0.001908 | 0.000276 | 1.32 | AKT1S1         | AKT1 substrate 1 (proline-rich)                               | Upregulated |
| A_23_P502 | 0.001908 | 0.000276 | 1.32 | PHF2           | PHD finger protein 2                                          | Upregulated |
| A_23_P359 | 0.00195  | 0.000286 | 1.32 | EPC2           | enhancer of polycomb homolog 2 (Drosophila)                   | Upregulated |
| A_21_P001 | 0.002062 | 0.000317 | 1.32 | lnc-NFATC2-1   | lnc-NFATC2-1:1                                                | Upregulated |
| A_23_P249 | 0.002232 | 0.000362 | 1.32 | CDK4           | cyclin-dependent kinase 4                                     | Upregulated |
| A_24_P417 | 0.002347 | 0.00039  | 1.32 | FRG1B          | FSD region gene 1 family, member B                            | Upregulated |
| A_24_P241 | 0.002454 | 0.000416 | 1.32 | DCAF4          | DDB1 and CUL4 associated factor 4                             | Upregulated |
| A_24_P597 | 0.00247  | 0.000421 | 1.32 | CTD-2151A2     | uncharacterized LOC102724855                                  | Upregulated |
| A_33_P331 | 0.003343 | 0.000672 | 1.32 | FANCC          | Fanconi anemia, complementation group C                       | Upregulated |
| A_33_P327 | 0.003667 | 0.000769 | 1.32 | ZIK1           | zinc finger protein interacting with K protein 1              | Upregulated |
| A_21_P001 | 0.005054 | 0.00123  | 1.32 | XLOC_I2_004594 |                                                               | Upregulated |
| A_33_P336 | 0.005296 | 0.00132  | 1.32 | BRMS1          | breast cancer metastasis suppressor 1                         | Upregulated |
| A_23_P936 | 0.006372 | 0.00173  | 1.32 | ASIC3          | acid sensing (proton gated) ion channel 3                     | Upregulated |
| A_23_P148 | 0.008614 | 0.00262  | 1.32 | PTGER4         | prostaglandin E receptor 4 (subtype EP4)                      | Upregulated |
| A_21_P001 | 0.009666 | 0.00305  | 1.32 | PHF21B         | PHD finger protein 21B                                        | Upregulated |
| A_33_P342 | 0.023957 | 0.00974  | 1.32 | OR4D6          | olfactory receptor, family 4, subfamily D, member 6           | Upregulated |
| A_22_P000 | 0.025963 | 0.0108   | 1.32 | lnc-C16orf88-  | lnc-C16orf88-1:3                                              | Upregulated |
| A_21_P000 | 0.043671 | 0.0204   | 1.32 | lnc-SGPP1-1    | lnc-SGPP1-1:1                                                 | Upregulated |
| A_23_P598 | 0.054346 | 0.0265   | 1.32 | METTL2B        | methyltransferase like 2B                                     | Upregulated |
| A_23_P426 | 0.001385 | 0.000155 | 1.31 | POLR2J         | polymerase (RNA) II (DNA directed) polypeptide J, 13.3kDa     | Upregulated |
| A_32_P430 | 0.001394 | 0.000157 | 1.31 | FRG1           | FSD region gene 1                                             | Upregulated |
| A_23_P384 | 0.001398 | 0.000158 | 1.31 | TAOK1          | TAO kinase 1                                                  | Upregulated |
| A_23_P310 | 0.001444 | 0.000168 | 1.31 | RANBP3         | RAN binding protein 3                                         | Upregulated |
| A_33_P340 | 0.001522 | 0.000185 | 1.31 | C6orf226       | chromosome 6 open reading frame 226                           | Upregulated |
| A_33_P326 | 0.001537 | 0.000188 | 1.31 | LOC1001311     | uncharacterized LOC100131132                                  | Upregulated |
| A_22_P000 | 0.00163  | 0.000209 | 1.31 | lnc-TLCD2-2    | lnc-TLCD2-2:1                                                 | Upregulated |
| A_24_P400 | 0.001894 | 0.000272 | 1.31 | TMC8           | transmembrane channel-like 8                                  | Upregulated |
| A_33_P337 | 0.00191  | 0.000276 | 1.31 | PLEKHO1        | pleckstrin homology domain containing, family O member 1      | Upregulated |
| A_23_P616 | 0.001991 | 0.000298 | 1.31 | CLK4           | CDC-like kinase 4                                             | Upregulated |
| A_24_P166 | 0.002027 | 0.000308 | 1.31 | CDK6           | cyclin-dependent kinase 6                                     | Upregulated |
| A_19_P003 | 0.002721 | 0.000489 | 1.31 | ZNF83          | zinc finger protein 83                                        | Upregulated |
| A_23_P167 | 0.00302  | 0.000574 | 1.31 | PRPF40A        | PRP40 pre-mRNA processing factor 40 homolog A (S. cerevisiae) | Upregulated |
| A_32_P353 | 0.003438 | 0.000699 | 1.31 | PTDSS2         | phosphatidylserine synthase 2                                 | Upregulated |

|           |          |          |      |                |                                                                      |             |
|-----------|----------|----------|------|----------------|----------------------------------------------------------------------|-------------|
| A_21_P001 | 0.004356 | 0.000994 | 1.31 | DUX4           | double homeobox 4                                                    | Upregulated |
| A_24_P353 | 0.004466 | 0.00103  | 1.31 | GUCD1          | guanylyl cyclase domain containing 1                                 | Upregulated |
| A_24_P943 | 0.005753 | 0.00149  | 1.31 | ARL5B          | ADP-ribosylation factor-like 5B                                      | Upregulated |
| A_33_P341 | 0.007033 | 0.00198  | 1.31 | lnc-HJURP-1    | lnc-HJURP-1:1                                                        | Upregulated |
| A_33_P335 | 0.00708  | 0.002    | 1.31 | SMG7           | SMG7 nonsense mediated mRNA decay factor                             | Upregulated |
| A_33_P340 | 0.008114 | 0.00241  | 1.31 | EPHA6          | EPH receptor A6                                                      | Upregulated |
| A_24_P218 | 0.013137 | 0.00455  | 1.31 | MED17          | mediator complex subunit 17                                          | Upregulated |
| A_33_P333 | 0.031837 | 0.0139   | 1.31 | ABCB4          | ATP-binding cassette, sub-family B (MDR/TAP), member 4               | Upregulated |
| A_23_P112 | 0.048955 | 0.0234   | 1.31 | GSDMD          | gasdermin D                                                          | Upregulated |
| A_24_P159 | 0.001559 | 0.000193 | 1.3  | PDCD7          | programmed cell death 7                                              | Upregulated |
| A_23_P365 | 0.001626 | 0.000208 | 1.3  | PPP1R14B       | protein phosphatase 1, regulatory (inhibitor) subunit 14B            | Upregulated |
| A_23_P159 | 0.001691 | 0.000223 | 1.3  | TAF15          | TAF15 RNA polymerase II, TATA box binding protein (TBP)-associated i | Upregulated |
| A_33_P339 | 0.001793 | 0.000247 | 1.3  | LOC727721      | uncharacterized LOC727721                                            | Upregulated |
| A_23_P419 | 0.001879 | 0.000268 | 1.3  | CCDC127        | coiled-coil domain containing 127                                    | Upregulated |
| A_23_P413 | 0.002002 | 0.000301 | 1.3  | ABCE1          | ATP-binding cassette, sub-family E (OABP), member 1                  | Upregulated |
| A_21_P000 | 0.002229 | 0.000362 | 1.3  | LARP4          | La ribonucleoprotein domain family, member 4                         | Upregulated |
| A_23_P148 | 0.002428 | 0.00041  | 1.3  | CSTF2          | cleavage stimulation factor, 3' pre-RNA, subunit 2, 64kDa            | Upregulated |
| A_23_P111 | 0.002495 | 0.000428 | 1.3  | TBC1D7         | TBC1 domain family, member 7                                         | Upregulated |
| A_23_P132 | 0.002528 | 0.000437 | 1.3  | EIF4ENIF1      | eukaryotic translation initiation factor 4E nuclear import factor 1  | Upregulated |
| A_23_P453 | 0.002952 | 0.000554 | 1.3  | HTATSF1        | HIV-1 Tat specific factor 1                                          | Upregulated |
| A_22_P000 | 0.002984 | 0.000562 | 1.3  | lnc-CES1-3     | lnc-CES1-3:1                                                         | Upregulated |
| A_24_P632 | 0.003293 | 0.000657 | 1.3  | RPN1           | ribophorin I                                                         | Upregulated |
| A_21_P000 | 0.004207 | 0.000941 | 1.3  | LOC1009963     | uncharacterized LOC100996324                                         | Upregulated |
| A_23_P212 | 0.004498 | 0.00104  | 1.3  | TTC14          | tetratricopeptide repeat domain 14                                   | Upregulated |
| A_23_P165 | 0.008932 | 0.00275  | 1.3  | EIF4E2         | eukaryotic translation initiation factor 4E family member 2          | Upregulated |
| A_22_P000 | 0.009837 | 0.00312  | 1.3  | lnc-PKLR-2     | lnc-PKLR-2:1                                                         | Upregulated |
| A_33_P333 | 0.02036  | 0.00794  | 1.3  | ABCB8          | ATP-binding cassette, sub-family B (MDR/TAP), member 8               | Upregulated |
| A_21_P000 | 0.022763 | 0.00912  | 1.3  | PGM3           | phosphoglucomutase 3                                                 | Upregulated |
| A_21_P001 | 0.023746 | 0.00963  | 1.3  | XLOC_l2_007829 |                                                                      | Upregulated |
| A_24_P110 | 0.028148 | 0.0119   | 1.3  | CSAG1          | chondrosarcoma associated gene 1                                     | Upregulated |
| A_23_P695 | 0.07597  | 0.0396   | 1.3  | GUCY1A3        | guanylate cyclase 1, soluble, alpha 3                                | Upregulated |
| A_33_P340 | 0.001443 | 0.000168 | 1.29 | IL4I1          | interleukin 4 induced 1                                              | Upregulated |
| A_33_P321 | 0.001483 | 0.000177 | 1.29 | SLC35F2        | solute carrier family 35, member F2                                  | Upregulated |
| A_23_P218 | 0.001597 | 0.000201 | 1.29 | XPNPEP3        | X-prolyl aminopeptidase (aminopeptidase P) 3, putative               | Upregulated |
| A_23_P347 | 0.001603 | 0.000202 | 1.29 | SP3            | Sp3 transcription factor                                             | Upregulated |
| A_23_P706 | 0.001612 | 0.000204 | 1.29 | CD83           | CD83 molecule                                                        | Upregulated |
| A_33_P336 | 0.001626 | 0.000208 | 1.29 | HIBCH          | 3-hydroxyisobutyryl-CoA hydrolase                                    | Upregulated |



|           |          |          |      |                |                                                                                 |             |
|-----------|----------|----------|------|----------------|---------------------------------------------------------------------------------|-------------|
| A_21_P001 | 0.001919 | 0.000279 | 1.29 | LINC00158      | long intergenic non-protein coding RNA 158                                      | Upregulated |
| A_23_P128 | 0.001949 | 0.000286 | 1.29 | RAB21          | RAB21, member RAS oncogene family                                               | Upregulated |
| A_23_P358 | 0.001958 | 0.000289 | 1.29 | POPDC3         | popeye domain containing 3                                                      | Upregulated |
| A_22_P000 | 0.002511 | 0.000433 | 1.29 | LOC1019287     | uncharacterized LOC101928737                                                    | Upregulated |
| A_24_P302 | 0.002728 | 0.000491 | 1.29 | FCHSD2         | FCH and double SH3 domains 2                                                    | Upregulated |
| A_23_P102 | 0.002834 | 0.00052  | 1.29 | COQ10B         | coenzyme Q10 homolog B (S. cerevisiae)                                          | Upregulated |
| A_24_P642 | 0.002872 | 0.00053  | 1.29 | ALDH1B1        | aldehyde dehydrogenase 1 family, member B1                                      | Upregulated |
| A_23_P658 | 0.003163 | 0.000618 | 1.29 | FBXO22         | F-box protein 22                                                                | Upregulated |
| A_24_P187 | 0.003199 | 0.00063  | 1.29 | CNOT4          | CCR4-NOT transcription complex, subunit 4                                       | Upregulated |
| A_24_P391 | 0.003224 | 0.000636 | 1.29 | PTTG1IP        | pituitary tumor-transforming 1 interacting protein                              | Upregulated |
| A_21_P001 | 0.00452  | 0.00105  | 1.29 | XLOC_I2_015438 |                                                                                 | Upregulated |
| A_33_P341 | 0.006535 | 0.00179  | 1.29 | ZNF891         | zinc finger protein 891                                                         | Upregulated |
| A_24_P377 | 0.008344 | 0.00251  | 1.29 | OSBPL3         | oxysterol binding protein-like 3                                                | Upregulated |
| A_33_P335 | 0.008765 | 0.00268  | 1.29 | LOC403323      | uncharacterized LOC403323                                                       | Upregulated |
| A_23_P378 | 0.011229 | 0.00371  | 1.29 | TMEM64         | transmembrane protein 64                                                        | Upregulated |
| A_33_P342 | 0.015816 | 0.00579  | 1.29 | ZNF710         | zinc finger protein 710                                                         | Upregulated |
| A_22_P000 | 0.01767  | 0.00667  | 1.29 | lnc-CTSL2-2    | lnc-CTSL2-2:1                                                                   | Upregulated |
| A_21_P001 | 0.01767  | 0.00667  | 1.29 | LOC646588      | uncharacterized LOC646588                                                       | Upregulated |
| A_33_P384 | 0.018047 | 0.00685  | 1.29 | LINC01281      | long intergenic non-protein coding RNA 1281                                     | Upregulated |
| A_22_P000 | 0.025564 | 0.0106   | 1.29 | lnc-GJA4-1     | lnc-GJA4-1:1                                                                    | Upregulated |
| A_23_P124 | 0.026603 | 0.0111   | 1.29 | CLCN3          | chloride channel, voltage-sensitive 3                                           | Upregulated |
| A_33_P339 | 0.030769 | 0.0133   | 1.29 | LRP1           | low density lipoprotein receptor-related protein 1                              | Upregulated |
| A_19_P003 | 0.03725  | 0.0168   | 1.29 | LINC01013      | long intergenic non-protein coding RNA 1013                                     | Upregulated |
| A_33_P327 | 0.03725  | 0.0168   | 1.29 | NMT2           | N-myristoyltransferase 2                                                        | Upregulated |
| A_21_P001 | 0.059747 | 0.0297   | 1.29 | XLOC_I2_004385 |                                                                                 | Upregulated |
| A_23_P106 | 0.001475 | 0.000175 | 1.28 | NFKBIA         | nuclear factor of kappa light polypeptide gene enhancer in B-cells inhibitor 1A | Upregulated |
| A_23_P415 | 0.001543 | 0.000189 | 1.28 | HIST1H4E       | histone cluster 1, H4e                                                          | Upregulated |
| A_24_P700 | 0.001699 | 0.000226 | 1.28 | LATS2          | large tumor suppressor kinase 2                                                 | Upregulated |
| A_33_P337 | 0.001812 | 0.000252 | 1.28 | NAMPT          | nicotinamide phosphoribosyltransferase                                          | Upregulated |
| A_23_P656 | 0.001819 | 0.000254 | 1.28 | GTF2A1         | general transcription factor IIA, 1, 19/37kDa                                   | Upregulated |
| A_23_P409 | 0.001854 | 0.000263 | 1.28 | USP13          | ubiquitin specific peptidase 13 (isopeptidase T-3)                              | Upregulated |
| A_23_P602 | 0.002179 | 0.000349 | 1.28 | EIF4B          | eukaryotic translation initiation factor 4B                                     | Upregulated |
| A_24_P299 | 0.002768 | 0.000502 | 1.28 | FAM101B        | family with sequence similarity 101, member B                                   | Upregulated |
| A_23_P134 | 0.002944 | 0.00055  | 1.28 | BTBD10         | BTB (POZ) domain containing 10                                                  | Upregulated |
| A_23_P156 | 0.003795 | 0.000808 | 1.28 | C17orf75       | chromosome 17 open reading frame 75                                             | Upregulated |
| A_22_P000 | 0.003997 | 0.000872 | 1.28 | LINC01252      | long intergenic non-protein coding RNA 1252                                     | Upregulated |
| A_23_P113 | 0.004324 | 0.000982 | 1.28 | KATNA1         | katanin p60 (ATPase containing) subunit A 1                                     | Upregulated |

|           |          |          |      |              |                                                            |             |
|-----------|----------|----------|------|--------------|------------------------------------------------------------|-------------|
| A_23_P251 | 0.004678 | 0.0011   | 1.28 | NF2          | neurofibromin 2 (merlin)                                   | Upregulated |
| A_32_P703 | 0.005244 | 0.0013   | 1.28 | LOC646626    | uncharacterized LOC646626                                  | Upregulated |
| A_22_P000 | 0.007062 | 0.002    | 1.28 | lnc-PRKACG-  | lnc-PRKACG-3:1                                             | Upregulated |
| A_24_P172 | 0.008584 | 0.0026   | 1.28 | GMFB         | glia maturation factor, beta                               | Upregulated |
| A_22_P000 | 0.018659 | 0.00713  | 1.28 | lnc-MRAP-1   | lnc-MRAP-1:1                                               | Upregulated |
| A_24_P223 | 0.026736 | 0.0112   | 1.28 | NAF1         | nuclear assembly factor 1 ribonucleoprotein                | Upregulated |
| A_22_P000 | 0.038392 | 0.0175   | 1.28 | lnc-KCNMB1-  | lnc-KCNMB1-3:2                                             | Upregulated |
| A_22_P000 | 0.042136 | 0.0196   | 1.28 | lnc-THBS4-3  | lnc-THBS4-3:1                                              | Upregulated |
| A_33_P331 | 0.042471 | 0.0197   | 1.28 | UHRF1BP1     | UHRF1 binding protein 1                                    | Upregulated |
| A_21_P000 | 0.067234 | 0.0342   | 1.28 | lnc-SH3GL3-1 | lnc-SH3GL3-1:1                                             | Upregulated |
| A_24_P433 | 0.001443 | 0.000167 | 1.27 | RNF38        | ring finger protein 38                                     | Upregulated |
| A_23_P130 | 0.001481 | 0.000177 | 1.27 | ROCK1        | Rho-associated, coiled-coil containing protein kinase 1    | Upregulated |
| A_23_P140 | 0.001731 | 0.000232 | 1.27 | NDUFB1       | NADH dehydrogenase (ubiquinone) 1 beta subcomplex, 1, 7kDa | Upregulated |
| A_23_P411 | 0.001825 | 0.000256 | 1.27 | OSTC         | oligosaccharyltransferase complex subunit (non-catalytic)  | Upregulated |
| A_24_P298 | 0.002075 | 0.00032  | 1.27 | CBX1         | chromobox homolog 1                                        | Upregulated |
| A_33_P370 | 0.002124 | 0.000335 | 1.27 | lnc-ZNF717-1 | lnc-ZNF717-1:1                                             | Upregulated |
| A_23_P363 | 0.002748 | 0.000496 | 1.27 | SLC38A1      | solute carrier family 38, member 1                         | Upregulated |
| A_33_P336 | 0.002951 | 0.000553 | 1.27 | YIF1A        | Yip1 interacting factor homolog A ( <i>S. cerevisiae</i> ) | Upregulated |
| A_23_P152 | 0.003041 | 0.00058  | 1.27 | ENGASE       | endo-beta-N-acetylglucosaminidase                          | Upregulated |
| A_22_P000 | 0.003311 | 0.000662 | 1.27 | STX6         | syntaxin 6                                                 | Upregulated |
| A_23_P432 | 0.004321 | 0.000981 | 1.27 | PMM2         | phosphomannomutase 2                                       | Upregulated |
| A_21_P001 | 0.004882 | 0.00117  | 1.27 | LOC1027233   | uncharacterized LOC102723382                               | Upregulated |
| A_23_P122 | 0.006012 | 0.00159  | 1.27 | MSH3         | mutS homolog 3                                             | Upregulated |
| A_33_P333 | 0.006219 | 0.00167  | 1.27 | TMEM53       | transmembrane protein 53                                   | Upregulated |
| A_23_P108 | 0.011539 | 0.00385  | 1.27 | STK16        | serine/threonine kinase 16                                 | Upregulated |
| A_23_P158 | 0.020623 | 0.00807  | 1.27 | BRIP1        | BRCA1 interacting protein C-terminal helicase 1            | Upregulated |
| A_21_P000 | 0.035323 | 0.0158   | 1.27 | LOC1005065   | uncharacterized LOC100506548                               | Upregulated |
| A_33_P326 | 0.037112 | 0.0168   | 1.27 | RAP1GAP      | RAP1 GTPase activating protein                             | Upregulated |
| A_33_P334 | 0.051781 | 0.025    | 1.27 | LOC284788    | uncharacterized LOC284788                                  | Upregulated |
| A_22_P000 | 0.075898 | 0.0395   | 1.27 | lnc-CDKAL1-1 | lnc-CDKAL1-1:1                                             | Upregulated |
| A_22_P000 | 0.075898 | 0.0395   | 1.27 | RORB-AS1     | RORB antisense RNA 1                                       | Upregulated |
| A_33_P322 | 0.001453 | 0.00017  | 1.26 | NCF1         | neutrophil cytosolic factor 1                              | Upregulated |
| A_22_P000 | 0.001481 | 0.000177 | 1.26 | lnc-FAM184B  | lnc-FAM184B-1:1                                            | Upregulated |
| A_32_P519 | 0.001552 | 0.000191 | 1.26 | KIAA1191     | KIAA1191                                                   | Upregulated |
| A_33_P340 | 0.001595 | 0.0002   | 1.26 | BOD1L1       | biorientation of chromosomes in cell division 1-like 1     | Upregulated |
| A_21_P001 | 0.001634 | 0.00021  | 1.26 | LOC374443    | C-type lectin domain family 2, member D pseudogene         | Upregulated |
| A_23_P150 | 0.001661 | 0.000216 | 1.26 | C11orf1      | chromosome 11 open reading frame 1                         | Upregulated |

|           |          |          |      |              |                                                                         |             |
|-----------|----------|----------|------|--------------|-------------------------------------------------------------------------|-------------|
| A_23_P211 | 0.001663 | 0.000217 | 1.26 | TCTEX1D2     | Tctex1 domain containing 2                                              | Upregulated |
| A_33_P325 | 0.001682 | 0.00022  | 1.26 | TRIM33       | tripartite motif containing 33                                          | Upregulated |
| A_23_P859 | 0.001693 | 0.000223 | 1.26 | ZNF326       | zinc finger protein 326                                                 | Upregulated |
| A_33_P335 | 0.001695 | 0.000224 | 1.26 | MYH9         | myosin, heavy chain 9, non-muscle                                       | Upregulated |
| A_24_P335 | 0.001859 | 0.000264 | 1.26 | ZNF266       | zinc finger protein 266                                                 | Upregulated |
| A_24_P127 | 0.00191  | 0.000276 | 1.26 | ST13         | suppression of tumorigenicity 13 (colon carcinoma) (Hsp70 interacting p | Upregulated |
| A_22_P000 | 0.001986 | 0.000297 | 1.26 | lnc-ARL6IP5- | lnc-ARL6IP5-1:1                                                         | Upregulated |
| A_24_P193 | 0.001996 | 0.000299 | 1.26 | PIGN         | phosphatidylinositol glycan anchor biosynthesis, class N                | Upregulated |
| A_24_P743 | 0.002028 | 0.000308 | 1.26 | CTSA         | cathepsin A                                                             | Upregulated |
| A_23_P825 | 0.002034 | 0.00031  | 1.26 | ABCB1        | ATP-binding cassette, sub-family B (MDR/TAP), member 1                  | Upregulated |
| A_24_P134 | 0.002179 | 0.000349 | 1.26 | SPATA13      | spermatogenesis associated 13                                           | Upregulated |
| A_19_P003 | 0.002283 | 0.000375 | 1.26 | UBA6-AS1     | UBA6 antisense RNA 1 (head to head)                                     | Upregulated |
| A_23_P641 | 0.00241  | 0.000406 | 1.26 | CARD16       | caspase recruitment domain family, member 16                            | Upregulated |
| A_33_P338 | 0.002482 | 0.000424 | 1.26 | GTSF1        | gametocyte specific factor 1                                            | Upregulated |
| A_32_P896 | 0.002765 | 0.000501 | 1.26 | ALG10B       | ALG10B, alpha-1,2-glucosyltransferase                                   | Upregulated |
| A_23_P775 | 0.003584 | 0.000746 | 1.26 | SSTR5        | somatostatin receptor 5                                                 | Upregulated |
| A_23_P516 | 0.005013 | 0.00122  | 1.26 | ATP13A1      | ATPase type 13A1                                                        | Upregulated |
| A_19_P003 | 0.007111 | 0.00202  | 1.26 | lnc-UBLCP1-4 | lnc-UBLCP1-4:1                                                          | Upregulated |
| A_22_P000 | 0.007339 | 0.0021   | 1.26 | lnc-SPATA9-1 | lnc-SPATA9-1:1                                                          | Upregulated |
| A_33_P330 | 0.007505 | 0.00217  | 1.26 | GPT          | glutamic-pyruvate transaminase (alanine aminotransferase)               | Upregulated |
| A_24_P845 | 0.017312 | 0.00651  | 1.26 | SPAG9        | sperm associated antigen 9                                              | Upregulated |
| A_33_P324 | 0.021031 | 0.00826  | 1.26 | FAIM2        | Fas apoptotic inhibitory molecule 2                                     | Upregulated |
| A_33_P333 | 0.030025 | 0.0129   | 1.26 | SLC26A11     | solute carrier family 26 (anion exchanger), member 11                   | Upregulated |
| A_23_P800 | 0.036295 | 0.0163   | 1.26 | FER1L4       | fer-1-like family member 4, pseudogene (functional)                     | Upregulated |
| A_33_P326 | 0.036295 | 0.0163   | 1.26 | NR6A1        | nuclear receptor subfamily 6, group A, member 1                         | Upregulated |
| A_21_P000 | 0.052813 | 0.0256   | 1.26 | lnc-LRP8-1   | lnc-LRP8-1:1                                                            | Upregulated |
| A_24_P344 | 0.00151  | 0.000182 | 1.25 | AGPAT3       | 1-acylglycerol-3-phosphate O-acyltransferase 3                          | Upregulated |
| A_32_P846 | 0.001644 | 0.000212 | 1.25 | RPS23        | ribosomal protein S23                                                   | Upregulated |
| A_32_P199 | 0.001771 | 0.000242 | 1.25 | HSP90AA1     | heat shock protein 90kDa alpha (cytosolic), class A member 1            | Upregulated |
| A_32_P179 | 0.002037 | 0.000311 | 1.25 | LOC1019296   | uncharacterized LOC101929687                                            | Upregulated |
| A_33_P322 | 0.002087 | 0.000324 | 1.25 | EIF1AX       | eukaryotic translation initiation factor 1A, X-linked                   | Upregulated |
| A_24_P790 | 0.002097 | 0.000326 | 1.25 | TGFB1        | transforming growth factor, beta 1                                      | Upregulated |
| A_33_P322 | 0.002251 | 0.000368 | 1.25 | DKFZp434J0:  | uncharacterized LOC93429                                                | Upregulated |
| A_23_P159 | 0.002452 | 0.000415 | 1.25 | VEGFB        | vascular endothelial growth factor B                                    | Upregulated |
| A_33_P329 | 0.002734 | 0.000492 | 1.25 | BAG1         | BCL2-associated athanogene                                              | Upregulated |
| A_33_P321 | 0.002775 | 0.000504 | 1.25 | AP5Z1        | adaptor-related protein complex 5, zeta 1 subunit                       | Upregulated |
| A_33_P332 | 0.002901 | 0.000539 | 1.25 | NRSN2        | neurensin 2                                                             | Upregulated |

|           |          |          |      |              |                                                                                 |             |
|-----------|----------|----------|------|--------------|---------------------------------------------------------------------------------|-------------|
| A_33_P380 | 0.002952 | 0.000554 | 1.25 | SPATS2       | spermatogenesis associated, serine-rich 2                                       | Upregulated |
| A_23_P699 | 0.003231 | 0.000638 | 1.25 | RARS         | arginyl-tRNA synthetase                                                         | Upregulated |
| A_24_P690 | 0.003515 | 0.000721 | 1.25 | SEC23B       | Sec23 homolog B ( <i>S. cerevisiae</i> )                                        | Upregulated |
| A_22_P000 | 0.003914 | 0.000847 | 1.25 | lnc-FBN2-6   | lnc-FBN2-6:1                                                                    | Upregulated |
| A_23_P204 | 0.004106 | 0.000906 | 1.25 | MPHOSPH8     | M-phase phosphoprotein 8                                                        | Upregulated |
| A_21_P000 | 0.004154 | 0.000922 | 1.25 | lnc-PFKP-9   | lnc-PFKP-9:1                                                                    | Upregulated |
| A_32_P662 | 0.006163 | 0.00164  | 1.25 | ANKRD20A2    | ankyrin repeat domain 20 family, member A2                                      | Upregulated |
| A_33_P338 | 0.006791 | 0.00189  | 1.25 | STXBP2       | syntaxin binding protein 2                                                      | Upregulated |
| A_23_P872 | 0.007225 | 0.00206  | 1.25 | MRPL17       | mitochondrial ribosomal protein L17                                             | Upregulated |
| A_33_P323 | 0.009552 | 0.003    | 1.25 | TET2         | tet methylcytosine dioxygenase 2                                                | Upregulated |
| A_33_P339 | 0.0141   | 0.00498  | 1.25 | SPATA25      | spermatogenesis associated 25                                                   | Upregulated |
| A_33_P329 | 0.014691 | 0.00527  | 1.25 | ALG2         | ALG2, alpha-1,3/1,6-mannosyltransferase                                         | Upregulated |
| A_21_P000 | 0.019729 | 0.00764  | 1.25 | lnc-ZRANB1-2 | lnc-ZRANB1-2:1                                                                  | Upregulated |
| A_24_P522 | 0.01975  | 0.00765  | 1.25 | ERICH3       | glutamate-rich 3                                                                | Upregulated |
| A_23_P200 | 0.020694 | 0.0081   | 1.25 | LRP8         | low density lipoprotein receptor-related protein 8, apolipoprotein e receptor 2 | Upregulated |
| A_33_P336 | 0.023746 | 0.00963  | 1.25 | SCARNA5      | small Cajal body-specific RNA 5                                                 | Upregulated |
| A_23_P629 | 0.030032 | 0.0129   | 1.25 | PBX1         | pre-B-cell leukemia homeobox 1                                                  | Upregulated |
| A_23_P435 | 0.0414   | 0.0191   | 1.25 | GPC4         | glypican 4                                                                      | Upregulated |
| A_32_P225 | 0.001497 | 0.00018  | 1.24 | UTS2B        | urotensin 2B                                                                    | Upregulated |
| A_23_P137 | 0.001503 | 0.000181 | 1.24 | ENO1         | enolase 1, (alpha)                                                              | Upregulated |
| A_23_P105 | 0.001522 | 0.000185 | 1.24 | ATL3         | atlastin GTPase 3                                                               | Upregulated |
| A_23_P752 | 0.001523 | 0.000185 | 1.24 | SLC25A28     | solute carrier family 25 (mitochondrial iron transporter), member 28            | Upregulated |
| A_24_P927 | 0.001552 | 0.000191 | 1.24 | OXNAD1       | oxidoreductase NAD-binding domain containing 1                                  | Upregulated |
| A_32_P114 | 0.001606 | 0.000203 | 1.24 | CACYBP       | calcyclin binding protein                                                       | Upregulated |
| A_23_P293 | 0.001661 | 0.000216 | 1.24 | RYBP         | RING1 and YY1 binding protein                                                   | Upregulated |
| A_24_P340 | 0.001804 | 0.00025  | 1.24 | NDUFAF4P1    | NADH dehydrogenase (ubiquinone) complex I, assembly factor 4 pseudogene         | Upregulated |
| A_19_P008 | 0.001908 | 0.000275 | 1.24 | FTL          | ferritin, light polypeptide                                                     | Upregulated |
| A_23_P125 | 0.002025 | 0.000307 | 1.24 | PGK1         | phosphoglycerate kinase 1                                                       | Upregulated |
| A_23_P160 | 0.002034 | 0.00031  | 1.24 | SLC19A2      | solute carrier family 19 (thiamine transporter), member 2                       | Upregulated |
| A_32_P100 | 0.0021   | 0.000326 | 1.24 | FLJ37453     | uncharacterized LOC729614                                                       | Upregulated |
| A_24_P209 | 0.002455 | 0.000416 | 1.24 | MRPS10       | mitochondrial ribosomal protein S10                                             | Upregulated |
| A_24_P286 | 0.002682 | 0.000478 | 1.24 | PURB         | purine-rich element binding protein B                                           | Upregulated |
| A_23_P131 | 0.006395 | 0.00174  | 1.24 | VPS54        | vacuolar protein sorting 54 homolog ( <i>S. cerevisiae</i> )                    | Upregulated |
| A_23_P116 | 0.006443 | 0.00176  | 1.24 | IFT46        | intraflagellar transport 46                                                     | Upregulated |
| A_22_P000 | 0.006628 | 0.00183  | 1.24 | LOC1019270   | uncharacterized LOC101927043                                                    | Upregulated |
| A_23_P358 | 0.006753 | 0.00187  | 1.24 | PML          | promyelocytic leukemia                                                          | Upregulated |
| A_23_P144 | 0.011081 | 0.00364  | 1.24 | CCRN4L       | CCR4 carbon catabolite repression 4-like ( <i>S. cerevisiae</i> )               | Upregulated |

|           |          |          |      |                |                                                                            |             |
|-----------|----------|----------|------|----------------|----------------------------------------------------------------------------|-------------|
| A_23_P125 | 0.014474 | 0.00517  | 1.24 | SLC26A11       | solute carrier family 26 (anion exchanger), member 11                      | Upregulated |
| A_23_P969 | 0.021235 | 0.00836  | 1.24 | SYNC           | syncoilin, intermediate filament protein                                   | Upregulated |
| A_21_P000 | 0.022183 | 0.00883  | 1.24 | ZBED6          | zinc finger, BED-type containing 6                                         | Upregulated |
| A_23_P259 | 0.025418 | 0.0105   | 1.24 | KCND2          | potassium channel, voltage gated Shal related subfamily D, member 2        | Upregulated |
| A_23_P139 | 0.025552 | 0.0106   | 1.24 | GALNT18        | polypeptide N-acetylgalactosaminyltransferase 18                           | Upregulated |
| A_23_P484 | 0.030335 | 0.0131   | 1.24 | CCNA1          | cyclin A1                                                                  | Upregulated |
| A_21_P000 | 0.032013 | 0.014    | 1.24 | LOC1019277     | uncharacterized LOC101927780                                               | Upregulated |
| A_21_P001 | 0.037423 | 0.0169   | 1.24 | FOXP4-AS1      | FOXP4 antisense RNA 1                                                      | Upregulated |
| A_33_P321 | 0.040083 | 0.0184   | 1.24 | HIRIP3         | HIRA interacting protein 3                                                 | Upregulated |
| A_22_P000 | 0.05525  | 0.0271   | 1.24 | lnc-AKIRIN1-1  | lnc-AKIRIN1-1:1                                                            | Upregulated |
| A_22_P000 | 0.057401 | 0.0283   | 1.24 | lnc-TAF15-1    | lnc-TAF15-1:1                                                              | Upregulated |
| A_22_P000 | 0.058736 | 0.0291   | 1.24 | CREB1          | cAMP responsive element binding protein 1                                  | Upregulated |
| A_23_P420 | 0.070072 | 0.0359   | 1.24 | SLC22A16       | solute carrier family 22 (organic cation/carnitine transporter), member 16 | Upregulated |
| A_32_P800 | 0.001889 | 0.000271 | 1.23 | CLEC2D         | C-type lectin domain family 2, member D                                    | Upregulated |
| A_32_P743 | 0.001908 | 0.000276 | 1.23 | VCPIP1         | valosin containing protein (p97)/p47 complex interacting protein 1         | Upregulated |
| A_33_P340 | 0.002006 | 0.000302 | 1.23 | ANP32E         | acidic (leucine-rich) nuclear phosphoprotein 32 family, member E           | Upregulated |
| A_33_P333 | 0.002024 | 0.000307 | 1.23 | HSD17B12       | hydroxysteroid (17-beta) dehydrogenase 12                                  | Upregulated |
| A_33_P334 | 0.002132 | 0.000338 | 1.23 | CHEK1          | checkpoint kinase 1                                                        | Upregulated |
| A_23_P205 | 0.002163 | 0.000344 | 1.23 | GMFB           | glia maturation factor, beta                                               | Upregulated |
| A_23_P217 | 0.002968 | 0.000559 | 1.23 | RGS16          | regulator of G-protein signaling 16                                        | Upregulated |
| A_33_P335 | 0.003003 | 0.000569 | 1.23 | POU3F1         | POU class 3 homeobox 1                                                     | Upregulated |
| A_23_P344 | 0.004051 | 0.000889 | 1.23 | TMEM39B        | transmembrane protein 39B                                                  | Upregulated |
| A_33_P339 | 0.004084 | 0.000898 | 1.23 | LINC01160      | long intergenic non-protein coding RNA 1160                                | Upregulated |
| A_23_P201 | 0.004491 | 0.00104  | 1.23 | DESI2          | desumoylating isopeptidase 2                                               | Upregulated |
| A_23_P128 | 0.004763 | 0.00113  | 1.23 | FKBP4          | FK506 binding protein 4, 59kDa                                             | Upregulated |
| A_23_P407 | 0.005058 | 0.00123  | 1.23 | PARVB          | parvin, beta                                                               | Upregulated |
| A_23_P661 | 0.006203 | 0.00166  | 1.23 | KNOP1          | lysine-rich nucleolar protein 1                                            | Upregulated |
| A_23_P204 | 0.011684 | 0.00392  | 1.23 | SLC41A2        | solute carrier family 41 (magnesium transporter), member 2                 | Upregulated |
| A_33_P342 | 0.013296 | 0.00462  | 1.23 | lnc-TMED5-1    | lnc-TMED5-1:28                                                             | Upregulated |
| A_21_P001 | 0.015312 | 0.00556  | 1.23 | TPTE2          | transmembrane phosphoinositide 3-phosphatase and tensin homolog 2          | Upregulated |
| A_32_P326 | 0.021987 | 0.00874  | 1.23 | SENP5          | SUMO1/sentrin specific peptidase 5                                         | Upregulated |
| A_33_P326 | 0.03179  | 0.0138   | 1.23 | B3GALT5-AS     | B3GALT5 antisense RNA 1                                                    | Upregulated |
| A_21_P001 | 0.033281 | 0.0146   | 1.23 | XLOC_I2_012366 |                                                                            | Upregulated |
| A_23_P253 | 0.042047 | 0.0195   | 1.23 | UNC13B         | unc-13 homolog B (C. elegans)                                              | Upregulated |
| A_23_P629 | 0.001532 | 0.000187 | 1.22 | ATF6           | activating transcription factor 6                                          | Upregulated |
| A_23_P654 | 0.001603 | 0.000202 | 1.22 | RAB2B          | RAB2B, member RAS oncogene family                                          | Upregulated |
| A_22_P000 | 0.001606 | 0.000203 | 1.22 | LRRC75A-AS     | LRRC75A antisense RNA 1                                                    | Upregulated |

|           |          |          |      |              |                                                                        |             |
|-----------|----------|----------|------|--------------|------------------------------------------------------------------------|-------------|
| A_24_P831 | 0.00183  | 0.000257 | 1.22 | AFF4         | AF4/FMR2 family, member 4                                              | Upregulated |
| A_23_P255 | 0.001848 | 0.000261 | 1.22 | RNF14        | ring finger protein 14                                                 | Upregulated |
| A_33_P326 | 0.001965 | 0.000292 | 1.22 | FAM120AOS    | family with sequence similarity 120A opposite strand                   | Upregulated |
| A_23_P119 | 0.0021   | 0.000326 | 1.22 | CNNM4        | cyclin and CBS domain divalent metal cation transport mediator 4       | Upregulated |
| A_24_P370 | 0.002124 | 0.000334 | 1.22 | ZMYM6NB      | ZMYM6 neighbor                                                         | Upregulated |
| A_23_P258 | 0.002241 | 0.000365 | 1.22 | PSMD10       | proteasome (prosome, macropain) 26S subunit, non-ATPase, 10            | Upregulated |
| A_33_P322 | 0.002361 | 0.000394 | 1.22 | LOC1027248   | uncharacterized LOC102724804                                           | Upregulated |
| A_33_P341 | 0.002579 | 0.000452 | 1.22 | RNF220       | ring finger protein 220                                                | Upregulated |
| A_23_P155 | 0.003178 | 0.000623 | 1.22 | GFM1         | G elongation factor, mitochondrial 1                                   | Upregulated |
| A_19_P008 | 0.003184 | 0.000625 | 1.22 | lnc-FBXW4-1  | lnc-FBXW4-1:1                                                          | Upregulated |
| A_33_P332 | 0.003668 | 0.00077  | 1.22 | LOC389906    | zinc finger protein 839 pseudogene                                     | Upregulated |
| A_24_P543 | 0.003779 | 0.000803 | 1.22 | RASGRP3      | RAS guanyl releasing protein 3 (calcium and DAG-regulated)             | Upregulated |
| A_21_P001 | 0.004983 | 0.00121  | 1.22 | DGCR5        | DiGeorge syndrome critical region gene 5 (non-protein coding)          | Upregulated |
| A_21_P001 | 0.005238 | 0.0013   | 1.22 | LINC00454    | long intergenic non-protein coding RNA 454                             | Upregulated |
| A_23_P678 | 0.005382 | 0.00135  | 1.22 | ADCY3        | adenylate cyclase 3                                                    | Upregulated |
| A_21_P001 | 0.005847 | 0.00152  | 1.22 | ZNF807       | zinc finger protein 807                                                | Upregulated |
| A_22_P000 | 0.006753 | 0.00187  | 1.22 | lnc-PEA15-1  | lnc-PEA15-1:1                                                          | Upregulated |
| A_33_P328 | 0.010886 | 0.00356  | 1.22 | SP6          | Sp6 transcription factor                                               | Upregulated |
| A_21_P001 | 0.032067 | 0.014    | 1.22 | C1orf61      | chromosome 1 open reading frame 61                                     | Upregulated |
| A_33_P334 | 0.03211  | 0.014    | 1.22 | LSM14B       | LSM14B, SCD6 homolog B (S. cerevisiae)                                 | Upregulated |
| A_33_P332 | 0.056476 | 0.0278   | 1.22 | PRR26        | proline rich 26                                                        | Upregulated |
| A_23_P215 | 0.078611 | 0.0412   | 1.22 | HBP1         | HMG-box transcription factor 1                                         | Upregulated |
| A_24_P586 | 0.001617 | 0.000206 | 1.21 | LOC1001333   | uncharacterized LOC100133331                                           | Upregulated |
| A_24_P154 | 0.001687 | 0.000221 | 1.21 | ECE1         | endothelin converting enzyme 1                                         | Upregulated |
| A_24_P319 | 0.001687 | 0.000221 | 1.21 | SUMO1        | small ubiquitin-like modifier 1                                        | Upregulated |
| A_24_P924 | 0.001972 | 0.000293 | 1.21 | VEZF1        | vascular endothelial zinc finger 1                                     | Upregulated |
| A_24_P402 | 0.002034 | 0.00031  | 1.21 | MBP          | myelin basic protein                                                   | Upregulated |
| A_33_P331 | 0.002083 | 0.000323 | 1.21 | PRKAA1       | protein kinase, AMP-activated, alpha 1 catalytic subunit               | Upregulated |
| A_33_P331 | 0.002166 | 0.000345 | 1.21 | USF2         | upstream transcription factor 2, c-fos interacting                     | Upregulated |
| A_23_P259 | 0.002309 | 0.000381 | 1.21 | TKTL1        | transketolase-like 1                                                   | Upregulated |
| A_23_P192 | 0.003949 | 0.000858 | 1.21 | SDHAF2       | succinate dehydrogenase complex assembly factor 2                      | Upregulated |
| A_21_P001 | 0.005296 | 0.00132  | 1.21 | lnc-MMRN1-2  | lnc-MMRN1-2:3                                                          | Upregulated |
| A_23_P593 | 0.005417 | 0.00137  | 1.21 | CEP57L1      | centrosomal protein 57kDa-like 1                                       | Upregulated |
| A_23_P141 | 0.00612  | 0.00163  | 1.21 | ZNF688       | zinc finger protein 688                                                | Upregulated |
| A_23_P994 | 0.009925 | 0.00316  | 1.21 | BRCA2        | breast cancer 2, early onset                                           | Upregulated |
| A_21_P000 | 0.009925 | 0.00316  | 1.21 | lnc-TNFSF11- | lnc-TNFSF11-1:1                                                        | Upregulated |
| A_24_P321 | 0.011487 | 0.00383  | 1.21 | PRKRIR       | protein-kinase, interferon-inducible double stranded RNA dependent int | Upregulated |

|           |          |          |      |              |                                                                   |             |
|-----------|----------|----------|------|--------------|-------------------------------------------------------------------|-------------|
| A_33_P321 | 0.01209  | 0.00409  | 1.21 | BMPR1A       | bone morphogenetic protein receptor, type IA                      | Upregulated |
| A_22_P000 | 0.012113 | 0.0041   | 1.21 | LOC1019276   | uncharacterized LOC101927637                                      | Upregulated |
| A_22_P000 | 0.013468 | 0.00469  | 1.21 | lnc-ZWINT-5  | lnc-ZWINT-5:1                                                     | Upregulated |
| A_22_P000 | 0.035165 | 0.0157   | 1.21 | lnc-AC006035 | lnc-AC006035.2-3:1                                                | Upregulated |
| A_23_P121 | 0.044655 | 0.0209   | 1.21 | TRAPPC13     | trafficking protein particle complex 13                           | Upregulated |
| A_22_P000 | 0.060624 | 0.0302   | 1.21 | lnc-GATAD1-2 | lnc-GATAD1-2:1                                                    | Upregulated |
| A_22_P000 | 0.073261 | 0.0379   | 1.21 | KCNJ10       | potassium channel, inwardly rectifying subfamily J, member 10     | Upregulated |
| A_33_P329 | 0.001808 | 0.000251 | 1.2  | DPP9         | dipeptidyl-peptidase 9                                            | Upregulated |
| A_23_P103 | 0.001913 | 0.000277 | 1.2  | MFNG         | MFNG O-fucosylpeptide 3-beta-N-acetylglucosaminyltransferase      | Upregulated |
| A_24_P337 | 0.002043 | 0.000313 | 1.2  | RABGEF1      | RAB guanine nucleotide exchange factor (GEF) 1                    | Upregulated |
| A_23_P120 | 0.002117 | 0.000333 | 1.2  | MTHFD2       | methylenetetrahydrofolate dehydrogenase (NADP+ dependent) 2, meth | Upregulated |
| A_23_P200 | 0.002128 | 0.000336 | 1.2  | NEXN         | nexilin (F actin binding protein)                                 | Upregulated |
| A_24_P105 | 0.002124 | 0.000336 | 1.2  | PRKAB2       | protein kinase, AMP-activated, beta 2 non-catalytic subunit       | Upregulated |
| A_23_P503 | 0.002227 | 0.000361 | 1.2  | EDARADD      | EDAR-associated death domain                                      | Upregulated |
| A_19_P003 | 0.002353 | 0.000391 | 1.2  | FAM200B      | family with sequence similarity 200, member B                     | Upregulated |
| A_24_P136 | 0.002423 | 0.000409 | 1.2  | TOPORS-AS    | TOPORS antisense RNA 1                                            | Upregulated |
| A_24_P356 | 0.002452 | 0.000415 | 1.2  | GABARAPL2    | GABA(A) receptor-associated protein-like 2                        | Upregulated |
| A_23_P470 | 0.002499 | 0.000429 | 1.2  | WDR37        | WD repeat domain 37                                               | Upregulated |
| A_23_P372 | 0.002596 | 0.000455 | 1.2  | GAPVD1       | GTPase activating protein and VPS9 domains 1                      | Upregulated |
| A_23_P204 | 0.00263  | 0.000464 | 1.2  | H2AFJ        | H2A histone family, member J                                      | Upregulated |
| A_33_P336 | 0.002907 | 0.000541 | 1.2  | NAP1L4       | nucleosome assembly protein 1-like 4                              | Upregulated |
| A_33_P324 | 0.00604  | 0.0016   | 1.2  | SPDL1        | spindle apparatus coiled-coil protein 1                           | Upregulated |
| A_23_P468 | 0.006588 | 0.00181  | 1.2  | OBFC1        | oligonucleotide/oligosaccharide-binding fold containing 1         | Upregulated |
| A_32_P206 | 0.007166 | 0.00204  | 1.2  | ZNF322       | zinc finger protein 322                                           | Upregulated |
| A_22_P000 | 0.011991 | 0.00405  | 1.2  | lnc-C10orf11 | lnc-C10orf11-3:1                                                  | Upregulated |
| A_32_P191 | 0.011991 | 0.00405  | 1.2  | LOC644662    | uncharacterized LOC644662                                         | Upregulated |
| A_23_P328 | 0.013274 | 0.00461  | 1.2  | LCOR         | ligand dependent nuclear receptor corepressor                     | Upregulated |
| A_23_P140 | 0.014406 | 0.00513  | 1.2  | TMEM8A       | transmembrane protein 8A                                          | Upregulated |
| A_23_P565 | 0.017727 | 0.0067   | 1.2  | C1D          | C1D nuclear receptor corepressor                                  | Upregulated |
| A_23_P112 | 0.018945 | 0.00727  | 1.2  | NUDT2        | nudix (nucleoside diphosphate linked moiety X)-type motif 2       | Upregulated |
| A_24_P965 | 0.033475 | 0.0147   | 1.2  | EVI5         | ecotropic viral integration site 5                                | Upregulated |
| A_22_P000 | 0.035267 | 0.0158   | 1.2  | LOC1005070   | uncharacterized LOC100507071                                      | Upregulated |
| A_22_P000 | 0.03885  | 0.0177   | 1.2  | LOC1001290   | uncharacterized LOC100129046                                      | Upregulated |
| A_33_P335 | 0.063131 | 0.0317   | 1.2  | GAS6-AS1     | GAS6 antisense RNA 1                                              | Upregulated |
| A_33_P330 | 0.08413  | 0.0448   | 1.2  | MTRR         | 5-methyltetrahydrofolate-homocysteine methyltransferase reductase | Upregulated |
| A_33_P322 | 0.001635 | 0.00021  | 1.19 | CDK11A       | cyclin-dependent kinase 11A                                       | Upregulated |
| A_23_P557 | 0.001667 | 0.000217 | 1.19 | RELB         | v-rel avian reticuloendotheliosis viral oncogene homolog B        | Upregulated |

|           |          |          |      |                |                                                                            |             |
|-----------|----------|----------|------|----------------|----------------------------------------------------------------------------|-------------|
| A_23_P368 | 0.001684 | 0.000221 | 1.19 | EME1           | essential meiotic structure-specific endonuclease 1                        | Upregulated |
| A_24_P565 | 0.001709 | 0.000228 | 1.19 | ALG1           | ALG1, chitobiosyldiphosphodolichol beta-mannosyltransferase                | Upregulated |
| A_23_P646 | 0.001709 | 0.000229 | 1.19 | ZCCHC8         | zinc finger, CCHC domain containing 8                                      | Upregulated |
| A_23_P519 | 0.00174  | 0.000234 | 1.19 | PFDN2          | prefoldin subunit 2                                                        | Upregulated |
| A_23_P257 | 0.001805 | 0.00025  | 1.19 | USP16          | ubiquitin specific peptidase 16                                            | Upregulated |
| A_23_P431 | 0.001981 | 0.000295 | 1.19 | YIPF6          | Yip1 domain family, member 6                                               | Upregulated |
| A_23_P171 | 0.002012 | 0.000304 | 1.19 | GPN1           | GPN-loop GTPase 1                                                          | Upregulated |
| A_22_P000 | 0.002037 | 0.000311 | 1.19 | lnc-RUNDC3A    | lnc-RUNDC3A-1:1                                                            | Upregulated |
| A_22_P000 | 0.002722 | 0.000489 | 1.19 | lnc-UBE2Z-1    | lnc-UBE2Z-1:1                                                              | Upregulated |
| A_23_P111 | 0.00274  | 0.000494 | 1.19 | YIPF3          | Yip1 domain family, member 3                                               | Upregulated |
| A_23_P425 | 0.00284  | 0.000522 | 1.19 | TRIO           | trio Rho guanine nucleotide exchange factor                                | Upregulated |
| A_21_P001 | 0.003394 | 0.000687 | 1.19 | FRG1           | FSDH region gene 1                                                         | Upregulated |
| A_22_P000 | 0.004088 | 0.0009   | 1.19 | lnc-AQP8-1     | lnc-AQP8-1:1                                                               | Upregulated |
| A_32_P558 | 0.004502 | 0.00104  | 1.19 | SKA2           | spindle and kinetochore associated complex subunit 2                       | Upregulated |
| A_33_P335 | 0.005252 | 0.00131  | 1.19 | MFSD12         | major facilitator superfamily domain containing 12                         | Upregulated |
| A_21_P001 | 0.005296 | 0.00132  | 1.19 | XLOC_I2_009613 |                                                                            | Upregulated |
| A_33_P338 | 0.0066   | 0.00182  | 1.19 | WHSC1          | Wolf-Hirschhorn syndrome candidate 1                                       | Upregulated |
| A_23_P510 | 0.0111   | 0.00365  | 1.19 | SPC25          | SPC25, NDC80 kinetochore complex component                                 | Upregulated |
| A_21_P001 | 0.014099 | 0.00498  | 1.19 | lnc-RGL4-4     | lnc-RGL4-4:4                                                               | Upregulated |
| A_22_P000 | 0.025957 | 0.0108   | 1.19 | LINC-R0002     | uncharacterized LincR-0002                                                 | Upregulated |
| A_22_P000 | 0.025957 | 0.0108   | 1.19 | lnc-TSPAN32    | lnc-TSPAN32-1:1                                                            | Upregulated |
| A_21_P000 | 0.052165 | 0.0252   | 1.19 | LINC01304      | long intergenic non-protein coding RNA 1304                                | Upregulated |
| A_33_P337 | 0.001643 | 0.000212 | 1.18 | SAT1           | spermidine/spermine N1-acetyltransferase 1                                 | Upregulated |
| A_23_P171 | 0.001651 | 0.000214 | 1.18 | IGBP1          | immunoglobulin (CD79A) binding protein 1                                   | Upregulated |
| A_23_P717 | 0.001695 | 0.000224 | 1.18 | CKS2           | CDC28 protein kinase regulatory subunit 2                                  | Upregulated |
| A_33_P331 | 0.00176  | 0.000239 | 1.18 | FAM46C         | family with sequence similarity 46, member C                               | Upregulated |
| A_19_P008 | 0.001837 | 0.000259 | 1.18 | lnc-SAA2-2     | lnc-SAA2-2:1                                                               | Upregulated |
| A_33_P321 | 0.001936 | 0.000282 | 1.18 | ETV6           | ets variant 6                                                              | Upregulated |
| A_23_P695 | 0.001991 | 0.000298 | 1.18 | CCNI           | cyclin I                                                                   | Upregulated |
| A_24_P743 | 0.002248 | 0.000368 | 1.18 | ZNF493         | zinc finger protein 493                                                    | Upregulated |
| A_22_P000 | 0.002314 | 0.000382 | 1.18 | lnc-GATAD2B    | lnc-GATAD2B-1:2                                                            | Upregulated |
| A_24_P277 | 0.002361 | 0.000394 | 1.18 | HIST1H4G       | histone cluster 1, H4g                                                     | Upregulated |
| A_32_P584 | 0.002468 | 0.00042  | 1.18 | PHF13          | PHD finger protein 13                                                      | Upregulated |
| A_33_P327 | 0.002572 | 0.00045  | 1.18 | ZNF525         | zinc finger protein 525                                                    | Upregulated |
| A_33_P336 | 0.002825 | 0.000517 | 1.18 | TAF8           | TAF8 RNA polymerase II, TATA box binding protein (TBP)-associated factor 8 | Upregulated |
| A_23_P897 | 0.003387 | 0.000683 | 1.18 | PHLPP1         | PH domain and leucine rich repeat protein phosphatase 1                    | Upregulated |
| A_23_P353 | 0.003468 | 0.000707 | 1.18 | LARP1B         | La ribonucleoprotein domain family, member 1B                              | Upregulated |



|           |          |          |      |              |                                                                      |             |
|-----------|----------|----------|------|--------------|----------------------------------------------------------------------|-------------|
| A_19_P003 | 0.003611 | 0.000753 | 1.18 | LOC220729    | succinate dehydrogenase complex, subunit A, flavoprotein (Fp) pseudo | Upregulated |
| A_33_P328 | 0.003728 | 0.000789 | 1.18 | ZNF775       | zinc finger protein 775                                              | Upregulated |
| A_23_P171 | 0.003985 | 0.000868 | 1.18 | WDR44        | WD repeat domain 44                                                  | Upregulated |
| A_22_P000 | 0.00422  | 0.000947 | 1.18 | lnc-SLC24A5  | lnc-SLC24A5-3:1                                                      | Upregulated |
| A_33_P341 | 0.005195 | 0.00128  | 1.18 | ACER2        | alkaline ceramidase 2                                                | Upregulated |
| A_24_P148 | 0.005869 | 0.00153  | 1.18 | UBE2E3       | ubiquitin-conjugating enzyme E2E 3                                   | Upregulated |
| A_33_P321 | 0.008048 | 0.00238  | 1.18 | LZTS1        | leucine zipper, putative tumor suppressor 1                          | Upregulated |
| A_22_P000 | 0.009619 | 0.00303  | 1.18 | CKMT2-AS1    | CKMT2 antisense RNA 1                                                | Upregulated |
| A_33_P339 | 0.010598 | 0.00344  | 1.18 | FAM73A       | family with sequence similarity 73, member A                         | Upregulated |
| A_21_P000 | 0.011718 | 0.00393  | 1.18 | LOC1019292   | uncharacterized LOC101929295                                         | Upregulated |
| A_24_P287 | 0.012163 | 0.00412  | 1.18 | TOLLIP       | toll interacting protein                                             | Upregulated |
| A_23_P145 | 0.02598  | 0.0108   | 1.18 | SUGCT        | succinyl-CoA:glutarate-CoA transferase                               | Upregulated |
| A_33_P335 | 0.031056 | 0.0135   | 1.18 | DDC          | dopa decarboxylase (aromatic L-amino acid decarboxylase)             | Upregulated |
| A_33_P330 | 0.036625 | 0.0165   | 1.18 | LOC1001300   | uncharacterized LOC100130078                                         | Upregulated |
| A_33_P335 | 0.049558 | 0.0238   | 1.18 | ETV1         | ets variant 1                                                        | Upregulated |
| A_21_P000 | 0.050136 | 0.0241   | 1.18 | lnc-USP12-2  | lnc-USP12-2:1                                                        | Upregulated |
| A_19_P003 | 0.053537 | 0.0261   | 1.18 | LINC00870    | long intergenic non-protein coding RNA 870                           | Upregulated |
| A_22_P000 | 0.0017   | 0.000226 | 1.17 | lnc-CEP152-1 | lnc-CEP152-1:1                                                       | Upregulated |
| A_33_P333 | 0.001815 | 0.000253 | 1.17 | GINM1        | glycoprotein integral membrane 1                                     | Upregulated |
| A_22_P000 | 0.001863 | 0.000265 | 1.17 | LOC1009964   | uncharacterized LOC100996425                                         | Upregulated |
| A_24_P407 | 0.001922 | 0.000279 | 1.17 | GRB2         | growth factor receptor-bound protein 2                               | Upregulated |
| A_23_P202 | 0.001958 | 0.000289 | 1.17 | PCGF5        | polycomb group ring finger 5                                         | Upregulated |
| A_22_P000 | 0.002022 | 0.000306 | 1.17 | LOC1019277   | uncharacterized LOC101927730                                         | Upregulated |
| A_22_P000 | 0.002034 | 0.00031  | 1.17 | lnc-AC114947 | lnc-AC114947.1.1-1:2                                                 | Upregulated |
| A_22_P000 | 0.002112 | 0.00033  | 1.17 | lnc-ACTR6-1  | lnc-ACTR6-1:1                                                        | Upregulated |
| A_24_P912 | 0.002112 | 0.00033  | 1.17 | MGC50722     | uncharacterized MGC50722                                             | Upregulated |
| A_32_P457 | 0.00218  | 0.000349 | 1.17 | PGAM1        | phosphoglycerate mutase 1 (brain)                                    | Upregulated |
| A_23_P698 | 0.002459 | 0.000417 | 1.17 | DHX15        | DEAH (Asp-Glu-Ala-His) box helicase 15                               | Upregulated |
| A_23_P211 | 0.00247  | 0.00042  | 1.17 | DGCR8        | DGCR8 microprocessor complex subunit                                 | Upregulated |
| A_33_P334 | 0.002524 | 0.000436 | 1.17 | AP2S1        | adaptor-related protein complex 2, sigma 1 subunit                   | Upregulated |
| A_24_P286 | 0.002572 | 0.000449 | 1.17 | AHCTF1       | AT hook containing transcription factor 1                            | Upregulated |
| A_23_P158 | 0.002661 | 0.000472 | 1.17 | ESRRA        | estrogen-related receptor alpha                                      | Upregulated |
| A_33_P335 | 0.002874 | 0.000531 | 1.17 | AKIRIN1      | akirin 1                                                             | Upregulated |
| A_33_P327 | 0.003113 | 0.000603 | 1.17 | FKBP8        | FK506 binding protein 8, 38kDa                                       | Upregulated |
| A_22_P000 | 0.003389 | 0.000685 | 1.17 | lnc-FAM168A  | lnc-FAM168A-1:1                                                      | Upregulated |
| A_24_P158 | 0.004647 | 0.00109  | 1.17 | IRAK4        | interleukin-1 receptor-associated kinase 4                           | Upregulated |
| A_23_P212 | 0.006202 | 0.00166  | 1.17 | PTPN23       | protein tyrosine phosphatase, non-receptor type 23                   | Upregulated |

|           |          |          |      |                |                                                                           |             |
|-----------|----------|----------|------|----------------|---------------------------------------------------------------------------|-------------|
| A_22_P000 | 0.006764 | 0.00188  | 1.17 | lnc-B4GALNT    | lnc-B4GALNT3-1:1                                                          | Upregulated |
| A_23_P353 | 0.010026 | 0.0032   | 1.17 | IGFBP7         | insulin-like growth factor binding protein 7                              | Upregulated |
| A_22_P000 | 0.010209 | 0.00329  | 1.17 | lnc-TMC7-1     | lnc-TMC7-1:1                                                              | Upregulated |
| A_33_P325 | 0.011464 | 0.00382  | 1.17 | PPP1R12B       | protein phosphatase 1, regulatory subunit 12B                             | Upregulated |
| A_21_P001 | 0.013974 | 0.00492  | 1.17 | LOC1019302     | uncharacterized LOC101930282                                              | Upregulated |
| A_24_P139 | 0.020379 | 0.00795  | 1.17 | USP21          | ubiquitin specific peptidase 21                                           | Upregulated |
| A_23_P367 | 0.023201 | 0.00934  | 1.17 | EPOR           | erythropoietin receptor                                                   | Upregulated |
| A_23_P516 | 0.030538 | 0.0132   | 1.17 | PLK3           | polo-like kinase 3                                                        | Upregulated |
| A_23_P366 | 0.036454 | 0.0164   | 1.17 | TDGF1          | teratocarcinoma-derived growth factor 1                                   | Upregulated |
| A_21_P001 | 0.044618 | 0.0209   | 1.17 | XLOC_I2_011309 |                                                                           | Upregulated |
| A_33_P330 | 0.06701  | 0.0341   | 1.17 | GGA1           | golgi-associated, gamma adaptin ear containing, ARF binding protein 1     | Upregulated |
| A_33_P353 | 0.001732 | 0.000233 | 1.16 | DARS           | aspartyl-tRNA synthetase                                                  | Upregulated |
| A_24_P100 | 0.001837 | 0.000259 | 1.16 | SH3RF1         | SH3 domain containing ring finger 1                                       | Upregulated |
| A_23_P404 | 0.001953 | 0.000287 | 1.16 | KIAA1147       | KIAA1147                                                                  | Upregulated |
| A_33_P341 | 0.002034 | 0.00031  | 1.16 | FAM96A         | family with sequence similarity 96, member A                              | Upregulated |
| A_33_P334 | 0.002219 | 0.000358 | 1.16 | TRAF3IP2       | TRAF3 interacting protein 2                                               | Upregulated |
| A_23_P600 | 0.002369 | 0.000396 | 1.16 | ANGPT2         | angiopoietin 2                                                            | Upregulated |
| A_33_P342 | 0.002492 | 0.000427 | 1.16 | IKZF5          | IKAROS family zinc finger 5 (Pegasus)                                     | Upregulated |
| A_32_P221 | 0.003483 | 0.000712 | 1.16 | MGC70870       | C-terminal binding protein 2 pseudogene                                   | Upregulated |
| A_32_P168 | 0.003532 | 0.000727 | 1.16 | ANAPC13        | anaphase promoting complex subunit 13                                     | Upregulated |
| A_33_P338 | 0.006489 | 0.00177  | 1.16 | FBXO5          | F-box protein 5                                                           | Upregulated |
| A_33_P334 | 0.010643 | 0.00346  | 1.16 | RHOBTB1        | Rho-related BTB domain containing 1                                       | Upregulated |
| A_23_P333 | 0.011562 | 0.00387  | 1.16 | ZNF547         | zinc finger protein 547                                                   | Upregulated |
| A_22_P000 | 0.012254 | 0.00416  | 1.16 | lnc-OTUD3-1    | lnc-OTUD3-1:1                                                             | Upregulated |
| A_22_P000 | 0.013997 | 0.00493  | 1.16 | RASAL2         | RAS protein activator like 2                                              | Upregulated |
| A_23_P119 | 0.027185 | 0.0114   | 1.16 | FXYD7          | FXYD domain containing ion transport regulator 7                          | Upregulated |
| A_33_P337 | 0.02899  | 0.0124   | 1.16 | OPA3           | optic atrophy 3 (autosomal recessive, with chorea and spastic paraplegia) | Upregulated |
| A_33_P330 | 0.02899  | 0.0124   | 1.16 | SLC16A10       | solute carrier family 16 (aromatic amino acid transporter), member 10     | Upregulated |
| A_22_P000 | 0.032792 | 0.0144   | 1.16 | lnc-AC090186   | lnc-AC090186.1-3:1                                                        | Upregulated |
| A_21_P000 | 0.039618 | 0.0182   | 1.16 | lnc-UBLCP1-8   | lnc-UBLCP1-8:2                                                            | Upregulated |
| A_21_P000 | 0.052196 | 0.0253   | 1.16 | lnc-PRR16-1    | lnc-PRR16-1:2                                                             | Upregulated |
| A_23_P352 | 0.001751 | 0.000236 | 1.15 | POLR2C         | polymerase (RNA) II (DNA directed) polypeptide C, 33kDa                   | Upregulated |
| A_24_P216 | 0.001808 | 0.000251 | 1.15 | LSM10          | LSM10, U7 small nuclear RNA associated                                    | Upregulated |
| A_24_P920 | 0.001863 | 0.000265 | 1.15 | ASB7           | ankyrin repeat and SOCS box containing 7                                  | Upregulated |
| A_33_P328 | 0.001962 | 0.000291 | 1.15 | KAT6A          | K(lysine) acetyltransferase 6A                                            | Upregulated |
| A_24_P418 | 0.002027 | 0.000308 | 1.15 | RPS17          | ribosomal protein S17                                                     | Upregulated |
| A_24_P260 | 0.002124 | 0.000335 | 1.15 | LRPPRC         | leucine-rich pentatricopeptide repeat containing                          | Upregulated |

|           |          |          |      |              |                                                                  |             |
|-----------|----------|----------|------|--------------|------------------------------------------------------------------|-------------|
| A_23_P102 | 0.002154 | 0.000342 | 1.15 | CCT4         | chaperonin containing TCP1, subunit 4 (delta)                    | Upregulated |
| A_24_P854 | 0.002271 | 0.000372 | 1.15 | ARIH1        | ariadne RBR E3 ubiquitin protein ligase 1                        | Upregulated |
| A_24_P388 | 0.00228  | 0.000374 | 1.15 | SRP19        | signal recognition particle 19kDa                                | Upregulated |
| A_23_P133 | 0.002286 | 0.000376 | 1.15 | PJA2         | praja ring finger 2, E3 ubiquitin protein ligase                 | Upregulated |
| A_23_P784 | 0.0025   | 0.00043  | 1.15 | ELP2         | elongator acetyltransferase complex subunit 2                    | Upregulated |
| A_33_P327 | 0.002532 | 0.000438 | 1.15 | SLC25A16     | solute carrier family 25 (mitochondrial carrier), member 16      | Upregulated |
| A_32_P226 | 0.00301  | 0.000571 | 1.15 | FOXP4-AS1    | FOXP4 antisense RNA 1                                            | Upregulated |
| A_23_P255 | 0.003658 | 0.000766 | 1.15 | DUS1L        | dihydrouridine synthase 1-like (S. cerevisiae)                   | Upregulated |
| A_23_P128 | 0.004595 | 0.00107  | 1.15 | HELLS        | helicase, lymphoid-specific                                      | Upregulated |
| A_33_P328 | 0.004613 | 0.00108  | 1.15 | IVNS1ABP     | influenza virus NS1A binding protein                             | Upregulated |
| A_33_P336 | 0.005041 | 0.00123  | 1.15 | RBBP9        | retinoblastoma binding protein 9                                 | Upregulated |
| A_23_P310 | 0.005219 | 0.00129  | 1.15 | PRSS3P2      | protease, serine, 3 pseudogene 2                                 | Upregulated |
| A_21_P000 | 0.005539 | 0.00141  | 1.15 | lnc-AC069257 | lnc-AC069257.9.1-5:1                                             | Upregulated |
| A_23_P266 | 0.005854 | 0.00153  | 1.15 | TMEM186      | transmembrane protein 186                                        | Upregulated |
| A_24_P942 | 0.006994 | 0.00197  | 1.15 | PGP          | phosphoglycolate phosphatase                                     | Upregulated |
| A_23_P208 | 0.007101 | 0.00201  | 1.15 | WDR34        | WD repeat domain 34                                              | Upregulated |
| A_33_P333 | 0.009013 | 0.00278  | 1.15 | PPCS         | phosphopantothoenoylcysteine synthetase                          | Upregulated |
| A_32_P434 | 0.010871 | 0.00355  | 1.15 | ZNF182       | zinc finger protein 182                                          | Upregulated |
| A_23_P214 | 0.016636 | 0.00619  | 1.15 | AIF1         | allograft inflammatory factor 1                                  | Upregulated |
| A_19_P003 | 0.017213 | 0.00647  | 1.15 | LOC1019271   | uncharacterized LOC101927151                                     | Upregulated |
| A_22_P000 | 0.025457 | 0.0105   | 1.15 | lnc-PAX8-1   | lnc-PAX8-1:2                                                     | Upregulated |
| A_23_P210 | 0.025963 | 0.0108   | 1.15 | SIRPA        | signal-regulatory protein alpha                                  | Upregulated |
| A_22_P000 | 0.035067 | 0.0156   | 1.15 | lnc-STOM-1   | lnc-STOM-1:1                                                     | Upregulated |
| A_33_P332 | 0.041447 | 0.0192   | 1.15 | ZDHHC3       | zinc finger, DHHC-type containing 3                              | Upregulated |
| A_22_P000 | 0.059444 | 0.0295   | 1.15 | lnc-RHD-1    | lnc-RHD-1:1                                                      | Upregulated |
| A_22_P000 | 0.001782 | 0.000244 | 1.14 | lnc-EFR3B-4  | lnc-EFR3B-4:1                                                    | Upregulated |
| A_32_P384 | 0.001823 | 0.000255 | 1.14 | SNHG8        | small nucleolar RNA host gene 8 (non-protein coding)             | Upregulated |
| A_24_P899 | 0.001884 | 0.000269 | 1.14 | SURF4        | surfeit 4                                                        | Upregulated |
| A_22_P000 | 0.001893 | 0.000272 | 1.14 | LOC1027233   | uncharacterized LOC102723366                                     | Upregulated |
| A_24_P874 | 0.001892 | 0.000272 | 1.14 | TVP23C       | trans-golgi network vesicle protein 23 homolog C (S. cerevisiae) | Upregulated |
| A_23_P618 | 0.001948 | 0.000285 | 1.14 | RAB24        | RAB24, member RAS oncogene family                                | Upregulated |
| A_33_P323 | 0.001958 | 0.000289 | 1.14 | DENND4B      | DENN/MADD domain containing 4B                                   | Upregulated |
| A_23_P509 | 0.002053 | 0.000315 | 1.14 | ITGAV        | integrin, alpha V                                                | Upregulated |
| A_23_P204 | 0.002124 | 0.000335 | 1.14 | TDG          | thymine-DNA glycosylase                                          | Upregulated |
| A_23_P212 | 0.002241 | 0.000365 | 1.14 | ELP6         | elongator acetyltransferase complex subunit 6                    | Upregulated |
| A_32_P150 | 0.002374 | 0.000397 | 1.14 | LOC407835    | mitogen-activated protein kinase kinase 2 pseudogene             | Upregulated |
| A_23_P487 | 0.002527 | 0.000437 | 1.14 | UCK2         | uridine-cytidine kinase 2                                        | Upregulated |

|           |          |          |      |               |                                                                          |             |
|-----------|----------|----------|------|---------------|--------------------------------------------------------------------------|-------------|
| A_33_P322 | 0.002597 | 0.000456 | 1.14 | PSIP1         | PC4 and SFRS1 interacting protein 1                                      | Upregulated |
| A_23_P364 | 0.002655 | 0.000471 | 1.14 | SELK          | selenoprotein K                                                          | Upregulated |
| A_33_P329 | 0.002714 | 0.000487 | 1.14 | PPM1B         | protein phosphatase, Mg <sup>2+</sup> /Mn <sup>2+</sup> dependent, 1B    | Upregulated |
| A_24_P155 | 0.002932 | 0.000547 | 1.14 | ASB7          | ankyrin repeat and SOCS box containing 7                                 | Upregulated |
| A_21_P001 | 0.004221 | 0.000948 | 1.14 | LOC388692     | uncharacterized LOC388692                                                | Upregulated |
| A_23_P144 | 0.004303 | 0.000974 | 1.14 | ANKRD32       | ankyrin repeat domain 32                                                 | Upregulated |
| A_23_P375 | 0.005628 | 0.00145  | 1.14 | AAGAB         | alpha- and gamma-adaptin binding protein                                 | Upregulated |
| A_23_P502 | 0.00702  | 0.00198  | 1.14 | CBFA2T2       | core-binding factor, runt domain, alpha subunit 2; translocated to, 2    | Upregulated |
| A_23_P218 | 0.009165 | 0.00284  | 1.14 | TPCN1         | two pore segment channel 1                                               | Upregulated |
| A_23_P160 | 0.010976 | 0.00359  | 1.14 | MYOG          | myogenin (myogenic factor 4)                                             | Upregulated |
| A_23_P457 | 0.021337 | 0.00842  | 1.14 | ORC1          | origin recognition complex, subunit 1                                    | Upregulated |
| A_33_P337 | 0.026634 | 0.0111   | 1.14 | AGAP11        | ankyrin repeat and GTPase domain Arf GTPase activating protein 11        | Upregulated |
| A_21_P000 | 0.031962 | 0.0139   | 1.14 | lnc-NFE2L3-2  | lnc-NFE2L3-2:1                                                           | Upregulated |
| A_22_P000 | 0.072699 | 0.0375   | 1.14 | lnc-HAS2-1    | lnc-HAS2-1:1                                                             | Upregulated |
| A_23_P833 | 0.00179  | 0.000246 | 1.13 | MRPL18        | mitochondrial ribosomal protein L18                                      | Upregulated |
| A_23_P157 | 0.001861 | 0.000264 | 1.13 | INTS10        | integrator complex subunit 10                                            | Upregulated |
| A_21_P000 | 0.001938 | 0.000283 | 1.13 | SNORD46       | small nucleolar RNA, C/D box 46                                          | Upregulated |
| A_33_P341 | 0.002114 | 0.000331 | 1.13 | NUDT21        | nudix (nucleoside diphosphate linked moiety X)-type motif 21             | Upregulated |
| A_33_P324 | 0.00234  | 0.000388 | 1.13 | XIAP          | X-linked inhibitor of apoptosis, E3 ubiquitin protein ligase             | Upregulated |
| A_24_P406 | 0.002416 | 0.000407 | 1.13 | SLC43A3       | solute carrier family 43, member 3                                       | Upregulated |
| A_33_P332 | 0.002469 | 0.00042  | 1.13 | RSPRY1        | ring finger and SPRY domain containing 1                                 | Upregulated |
| A_23_P435 | 0.002483 | 0.000425 | 1.13 | WSB1          | WD repeat and SOCS box containing 1                                      | Upregulated |
| A_23_P356 | 0.002644 | 0.000468 | 1.13 | MAPK8         | mitogen-activated protein kinase 8                                       | Upregulated |
| A_33_P330 | 0.002785 | 0.000506 | 1.13 | EXOSC4        | exosome component 4                                                      | Upregulated |
| A_21_P000 | 0.003149 | 0.000612 | 1.13 | lnc-COPS4-1   | lnc-COPS4-1:2                                                            | Upregulated |
| A_21_P001 | 0.003465 | 0.000707 | 1.13 | ANKRD20A9f    | ankyrin repeat domain 20 family, member A9, pseudogene                   | Upregulated |
| A_23_P614 | 0.003721 | 0.000787 | 1.13 | ETFDH         | electron-transferring-flavoprotein dehydrogenase                         | Upregulated |
| A_23_P743 | 0.004269 | 0.000964 | 1.13 | TADA1         | transcriptional adaptor 1                                                | Upregulated |
| A_23_P166 | 0.004313 | 0.000978 | 1.13 | TRMT10C       | tRNA methyltransferase 10 homolog C ( <i>S. cerevisiae</i> )             | Upregulated |
| A_33_P331 | 0.004725 | 0.00112  | 1.13 | ZNF215        | zinc finger protein 215                                                  | Upregulated |
| A_21_P000 | 0.005231 | 0.0013   | 1.13 | lnc-C5orf43-2 | lnc-C5orf43-2:1                                                          | Upregulated |
| A_33_P326 | 0.005399 | 0.00136  | 1.13 | MAZ           | MYC-associated zinc finger protein (purine-binding transcription factor) | Upregulated |
| A_23_P346 | 0.006116 | 0.00163  | 1.13 | MCU           | mitochondrial calcium uniporter                                          | Upregulated |
| A_33_P324 | 0.008137 | 0.00242  | 1.13 | GOLGA6L4      | golgin A6 family-like 4                                                  | Upregulated |
| A_23_P163 | 0.008331 | 0.0025   | 1.13 | ECI1          | enoyl-CoA delta isomerase 1                                              | Upregulated |
| A_23_P376 | 0.008796 | 0.00269  | 1.13 | BEND7         | BEN domain containing 7                                                  | Upregulated |
| A_24_P372 | 0.008796 | 0.00269  | 1.13 | PEX5          | peroxisomal biogenesis factor 5                                          | Upregulated |

|           |          |          |      |             |                                                                   |             |
|-----------|----------|----------|------|-------------|-------------------------------------------------------------------|-------------|
| A_33_P338 | 0.009543 | 0.003    | 1.13 | KIF3A       | kinesin family member 3A                                          | Upregulated |
| A_22_P000 | 0.020606 | 0.00806  | 1.13 | LOC1019273  | uncharacterized LOC101927326                                      | Upregulated |
| A_33_P336 | 0.022884 | 0.00918  | 1.13 | GYPA        | glycophorin A (MNS blood group)                                   | Upregulated |
| A_33_P361 | 0.026664 | 0.0112   | 1.13 | POLR1A      | polymerase (RNA) I polypeptide A, 194kDa                          | Upregulated |
| A_33_P324 | 0.052806 | 0.0256   | 1.13 | ZNF814      | zinc finger protein 814                                           | Upregulated |
| A_22_P000 | 0.077329 | 0.0404   | 1.13 | UBXN10-AS1  | UBXN10 antisense RNA 1                                            | Upregulated |
| A_21_P000 | 0.001838 | 0.000259 | 1.12 | LINC01490   | long intergenic non-protein coding RNA 1490                       | Upregulated |
| A_21_P000 | 0.001838 | 0.000259 | 1.12 | lnc-ATP6AP2 | lnc-ATP6AP2-5:1                                                   | Upregulated |
| A_33_P341 | 0.001949 | 0.000286 | 1.12 | ATMIN       | ATM interactor                                                    | Upregulated |
| A_32_P644 | 0.002027 | 0.000308 | 1.12 | SDE2        | SDE2 telomere maintenance homolog (S. pombe)                      | Upregulated |
| A_23_P942 | 0.00249  | 0.000426 | 1.12 | LY96        | lymphocyte antigen 96                                             | Upregulated |
| A_23_P400 | 0.002572 | 0.00045  | 1.12 | ETV3        | ets variant 3                                                     | Upregulated |
| A_33_P335 | 0.002631 | 0.000465 | 1.12 | TRIM78P     | tripartite motif containing 78, pseudogene                        | Upregulated |
| A_33_P321 | 0.002889 | 0.000536 | 1.12 | IBA57       | IBA57, iron-sulfur cluster assembly homolog (S. cerevisiae)       | Upregulated |
| A_21_P000 | 0.003491 | 0.000714 | 1.12 | LINC01012   | long intergenic non-protein coding RNA 1012                       | Upregulated |
| A_32_P946 | 0.004113 | 0.000908 | 1.12 | LRRC37B     | leucine rich repeat containing 37B                                | Upregulated |
| A_23_P278 | 0.004813 | 0.00115  | 1.12 | ZNF607      | zinc finger protein 607                                           | Upregulated |
| A_33_P384 | 0.005278 | 0.00132  | 1.12 | IKZF2       | IKAROS family zinc finger 2 (Helios)                              | Upregulated |
| A_33_P332 | 0.005389 | 0.00136  | 1.12 | THRB-AS1    | THRB antisense RNA 1                                              | Upregulated |
| A_23_P424 | 0.006917 | 0.00194  | 1.12 | RHOV        | ras homolog family member V                                       | Upregulated |
| A_21_P000 | 0.007685 | 0.00224  | 1.12 | LOC1019278  | uncharacterized LOC101927815                                      | Upregulated |
| A_21_P000 | 0.009226 | 0.00287  | 1.12 | VTRNA1-3    | vault RNA 1-3                                                     | Upregulated |
| A_24_P400 | 0.010993 | 0.0036   | 1.12 | SLC25A44    | solute carrier family 25, member 44                               | Upregulated |
| A_33_P340 | 0.01156  | 0.00386  | 1.12 | TMEM38B     | transmembrane protein 38B                                         | Upregulated |
| A_22_P000 | 0.024466 | 0.01     | 1.12 | MCM3AP      | minichromosome maintenance complex component 3 associated proteir | Upregulated |
| A_32_P150 | 0.024864 | 0.0102   | 1.12 | LOC1019283  | uncharacterized LOC101928370                                      | Upregulated |
| A_23_P171 | 0.025552 | 0.0106   | 1.12 | CCNB3       | cyclin B3                                                         | Upregulated |
| A_22_P000 | 0.031752 | 0.0138   | 1.12 | LOC1019274  | uncharacterized LOC101927472                                      | Upregulated |
| A_23_P320 | 0.045156 | 0.0213   | 1.12 | DEFB125     | defensin, beta 125                                                | Upregulated |
| A_21_P000 | 0.045156 | 0.0213   | 1.12 | lnc-SBF2-2  | lnc-SBF2-2:1                                                      | Upregulated |
| A_21_P000 | 0.048094 | 0.0229   | 1.12 | LOC1027252  | uncharacterized LOC102725283                                      | Upregulated |
| A_24_P343 | 0.048094 | 0.0229   | 1.12 | NTRK2       | neurotrophic tyrosine kinase, receptor, type 2                    | Upregulated |
| A_23_P873 | 0.054634 | 0.0267   | 1.12 | COMMD9      | COMM domain containing 9                                          | Upregulated |
| A_21_P000 | 0.054634 | 0.0267   | 1.12 | LOC1005057  | uncharacterized LOC100505715                                      | Upregulated |
| A_22_P000 | 0.054634 | 0.0267   | 1.12 | LOC1005060  | uncharacterized LOC100506085                                      | Upregulated |
| A_21_P001 | 0.066933 | 0.034    | 1.12 | LOC1002895  | uncharacterized LOC100289580                                      | Upregulated |
| A_21_P000 | 0.076004 | 0.0396   | 1.12 | PABPC1L2B-  | PABPC1L2B antisense RNA 1 (head to head)                          | Upregulated |

|           |          |          |      |            |                                                                        |             |
|-----------|----------|----------|------|------------|------------------------------------------------------------------------|-------------|
| A_23_P408 | 0.001865 | 0.000266 | 1.11 | CCT6B      | chaperonin containing TCP1, subunit 6B (zeta 2)                        | Upregulated |
| A_21_P001 | 0.001991 | 0.000298 | 1.11 | LOC1027254 | uncharacterized LOC102725415                                           | Upregulated |
| A_24_P766 | 0.002117 | 0.000333 | 1.11 | CSNK2A1    | casein kinase 2, alpha 1 polypeptide                                   | Upregulated |
| A_23_P306 | 0.002132 | 0.000338 | 1.11 | PPTC7      | PTC7 protein phosphatase homolog (S. cerevisiae)                       | Upregulated |
| A_23_P708 | 0.002154 | 0.000342 | 1.11 | BPGM       | 2,3-bisphosphoglycerate mutase                                         | Upregulated |
| A_24_P417 | 0.002361 | 0.000394 | 1.11 | TBL1X      | transducin (beta)-like 1X-linked                                       | Upregulated |
| A_24_P722 | 0.002483 | 0.000425 | 1.11 | DHTKD1     | dehydrogenase E1 and transketolase domain containing 1                 | Upregulated |
| A_23_P120 | 0.002677 | 0.000476 | 1.11 | TRIT1      | tRNA isopentenyltransferase 1                                          | Upregulated |
| A_21_P001 | 0.003393 | 0.000687 | 1.11 | SYNGR2     | synaptogyrin 2                                                         | Upregulated |
| A_33_P339 | 0.003567 | 0.00074  | 1.11 | ZC3HAV1    | zinc finger CCCH-type, antiviral 1                                     | Upregulated |
| A_32_P213 | 0.004341 | 0.000989 | 1.11 | C20orf202  | chromosome 20 open reading frame 202                                   | Upregulated |
| A_24_P207 | 0.004341 | 0.000989 | 1.11 | LCE2B      | late comified envelope 2B                                              | Upregulated |
| A_19_P003 | 0.004341 | 0.000989 | 1.11 | TBXAS1     | thromboxane A synthase 1 (platelet)                                    | Upregulated |
| A_24_P154 | 0.004843 | 0.00116  | 1.11 | ZBTB49     | zinc finger and BTB domain containing 49                               | Upregulated |
| A_23_P152 | 0.006493 | 0.00177  | 1.11 | EARS2      | glutamyl-tRNA synthetase 2, mitochondrial                              | Upregulated |
| A_23_P334 | 0.006885 | 0.00192  | 1.11 | SENPA8     | SUMO/sentrin specific peptidase family member 8                        | Upregulated |
| A_33_P321 | 0.007518 | 0.00217  | 1.11 | CCZ1       | CCZ1 vacuolar protein trafficking and biogenesis associated homolog (S | Upregulated |
| A_33_P332 | 0.008143 | 0.00242  | 1.11 | GOLGA2P6   | golgin A2 pseudogene 6                                                 | Upregulated |
| A_33_P334 | 0.008884 | 0.00273  | 1.11 | UBAP2      | ubiquitin associated protein 2                                         | Upregulated |
| A_23_P131 | 0.011812 | 0.00397  | 1.11 | THUMPD2    | THUMP domain containing 2                                              | Upregulated |
| A_21_P001 | 0.015092 | 0.00546  | 1.11 | SEPT7P2    | septin 7 pseudogene 2                                                  | Upregulated |
| A_23_P561 | 0.023072 | 0.00927  | 1.11 | SMG9       | SMG9 nonsense mediated mRNA decay factor                               | Upregulated |
| A_23_P316 | 0.033316 | 0.0146   | 1.11 | HOXB3      | homeobox B3                                                            | Upregulated |
| A_21_P000 | 0.03335  | 0.0147   | 1.11 | lnc-RMI1-3 | lnc-RMI1-3:1                                                           | Upregulated |
| A_33_P337 | 0.073354 | 0.0379   | 1.11 | FAM229B    | family with sequence similarity 229, member B                          | Upregulated |
| A_24_P258 | 0.001949 | 0.000286 | 1.1  | MASTL      | microtubule associated serine/threonine kinase-like                    | Upregulated |
| A_24_P235 | 0.00198  | 0.000295 | 1.1  | VDAC3      | voltage-dependent anion channel 3                                      | Upregulated |
| A_23_P166 | 0.001986 | 0.000297 | 1.1  | ABCG1      | ATP-binding cassette, sub-family G (WHITE), member 1                   | Upregulated |
| A_23_P631 | 0.002124 | 0.000335 | 1.1  | DDX20      | DEAD (Asp-Glu-Ala-Asp) box polypeptide 20                              | Upregulated |
| A_33_P334 | 0.002254 | 0.000369 | 1.1  | RRNAD1     | ribosomal RNA adenine dimethylase domain containing 1                  | Upregulated |
| A_33_P338 | 0.002284 | 0.000375 | 1.1  | ANKRD40    | ankyrin repeat domain 40                                               | Upregulated |
| A_33_P339 | 0.00233  | 0.000385 | 1.1  | CCDC6      | coiled-coil domain containing 6                                        | Upregulated |
| A_24_P233 | 0.002726 | 0.00049  | 1.1  | SDHC       | succinate dehydrogenase complex, subunit C, integral membrane prote    | Upregulated |
| A_23_P317 | 0.002881 | 0.000533 | 1.1  | C8orf76    | chromosome 8 open reading frame 76                                     | Upregulated |
| A_24_P368 | 0.003019 | 0.000574 | 1.1  | WDR26      | WD repeat domain 26                                                    | Upregulated |
| A_23_P735 | 0.003184 | 0.000625 | 1.1  | GRIPAP1    | GRIP1 associated protein 1                                             | Upregulated |
| A_24_P294 | 0.003572 | 0.000742 | 1.1  | PIK3R1     | phosphoinositide-3-kinase, regulatory subunit 1 (alpha)                | Upregulated |

|           |          |          |      |                                                                    |             |
|-----------|----------|----------|------|--------------------------------------------------------------------|-------------|
| A_19_P003 | 0.003689 | 0.000776 | 1.1  | LOC1019276 uncharacterized LOC101927686                            | Upregulated |
| A_23_P169 | 0.004227 | 0.00095  | 1.1  | SDC1 syndecan 1                                                    | Upregulated |
| A_23_P151 | 0.004447 | 0.00102  | 1.1  | IFNG interferon, gamma                                             | Upregulated |
| A_21_P001 | 0.005796 | 0.00151  | 1.1  | LOC1019282 uncharacterized LOC101928228                            | Upregulated |
| A_23_P361 | 0.005854 | 0.00153  | 1.1  | MS4A6A membrane-spanning 4-domains, subfamily A, member 6A         | Upregulated |
| A_21_P000 | 0.006058 | 0.0016   | 1.1  | lnc-RABGAP1 lnc-RABGAP1-1:1                                        | Upregulated |
| A_33_P325 | 0.006203 | 0.00166  | 1.1  | TCF7 transcription factor 7 (T-cell specific, HMG-box)             | Upregulated |
| A_23_P209 | 0.009437 | 0.00295  | 1.1  | ATG12 autophagy related 12                                         | Upregulated |
| A_33_P342 | 0.014864 | 0.00536  | 1.1  | OR4D9 olfactory receptor, family 4, subfamily D, member 9          | Upregulated |
| A_23_P362 | 0.014864 | 0.00536  | 1.1  | OR52B2 olfactory receptor, family 52, subfamily B, member 2        | Upregulated |
| A_23_P205 | 0.01536  | 0.00558  | 1.1  | CDC37L1 cell division cycle 37-like 1                              | Upregulated |
| A_23_P216 | 0.016641 | 0.0062   | 1.1  | CDC14B cell division cycle 14B                                     | Upregulated |
| A_23_P502 | 0.022057 | 0.00877  | 1.1  | DGKH diacylglycerol kinase, eta                                    | Upregulated |
| A_23_P139 | 0.022275 | 0.00887  | 1.1  | OASL 2'-5'-oligoadenylate synthetase-like                          | Upregulated |
| A_33_P338 | 0.022415 | 0.00894  | 1.1  | TCP11X2 t-complex 11 family, X-linked 2                            | Upregulated |
| A_23_P507 | 0.029562 | 0.0127   | 1.1  | ZNF181 zinc finger protein 181                                     | Upregulated |
| A_33_P327 | 0.030088 | 0.013    | 1.1  | UCN2 urocortin 2                                                   | Upregulated |
| A_21_P000 | 0.036707 | 0.0165   | 1.1  | lnc-ZNF296-1 lnc-ZNF296-1:1                                        | Upregulated |
| A_33_P335 | 0.042467 | 0.0197   | 1.1  | PTGFR prostaglandin F receptor (FP)                                | Upregulated |
| A_22_P000 | 0.055792 | 0.0274   | 1.1  | LINC00642 long intergenic non-protein coding RNA 642               | Upregulated |
| A_21_P000 | 0.056334 | 0.0277   | 1.1  | lnc-LY86-1 lnc-LY86-1:1                                            | Upregulated |
| A_33_P331 | 0.087386 | 0.0471   | 1.1  | XLOC_I2_005197                                                     | Upregulated |
| A_23_P165 | 0.001925 | 0.00028  | 1.09 | PSMD14 proteasome (prosome, macropain) 26S subunit, non-ATPase, 14 | Upregulated |
| A_23_P478 | 0.001962 | 0.000291 | 1.09 | DDX55 DEAD (Asp-Glu-Ala-Asp) box polypeptide 55                    | Upregulated |
| A_24_P377 | 0.002112 | 0.00033  | 1.09 | HSPA4 heat shock 70kDa protein 4                                   | Upregulated |
| A_23_P252 | 0.002124 | 0.000335 | 1.09 | YBX3 Y box binding protein 3                                       | Upregulated |
| A_23_P569 | 0.002174 | 0.000348 | 1.09 | HSPE1 heat shock 10kDa protein 1                                   | Upregulated |
| A_23_P154 | 0.002464 | 0.000419 | 1.09 | NOP58 NOP58 ribonucleoprotein                                      | Upregulated |
| A_23_P218 | 0.002471 | 0.000421 | 1.09 | EIF5B eukaryotic translation initiation factor 5B                  | Upregulated |
| A_33_P336 | 0.002476 | 0.000422 | 1.09 | LY9 lymphocyte antigen 9                                           | Upregulated |
| A_24_P250 | 0.00301  | 0.000571 | 1.09 | CBWD5 COBW domain containing 5                                     | Upregulated |
| A_33_P321 | 0.003056 | 0.000584 | 1.09 | ZNF808 zinc finger protein 808                                     | Upregulated |
| A_22_P000 | 0.003139 | 0.00061  | 1.09 | FAM204A family with sequence similarity 204, member A              | Upregulated |
| A_23_P256 | 0.003239 | 0.000641 | 1.09 | TLR6 toll-like receptor 6                                          | Upregulated |
| A_23_P106 | 0.003456 | 0.000704 | 1.09 | DDX28 DEAD (Asp-Glu-Ala-Asp) box polypeptide 28                    | Upregulated |
| A_21_P001 | 0.004102 | 0.000905 | 1.09 | LOC1002880 uncharacterized LOC100288069                            | Upregulated |
| A_33_P342 | 0.004626 | 0.00108  | 1.09 | C8orf59 chromosome 8 open reading frame 59                         | Upregulated |

|           |          |          |      |               |                                                                       |             |
|-----------|----------|----------|------|---------------|-----------------------------------------------------------------------|-------------|
| A_22_P000 | 0.004856 | 0.00116  | 1.09 | LOC1019277    | uncharacterized LOC101927734                                          | Upregulated |
| A_32_P414 | 0.005095 | 0.00124  | 1.09 | THOC3         | THO complex 3                                                         | Upregulated |
| A_22_P000 | 0.005732 | 0.00148  | 1.09 | lnc-PPP2R2D   | lnc-PPP2R2D-3:1                                                       | Upregulated |
| A_21_P000 | 0.007258 | 0.00207  | 1.09 | lnc-C1orf195- | lnc-C1orf195-3:2                                                      | Upregulated |
| A_23_P129 | 0.008618 | 0.00262  | 1.09 | SREBF1        | sterol regulatory element binding transcription factor 1              | Upregulated |
| A_23_P789 | 0.009825 | 0.00312  | 1.09 | DUSP22        | dual specificity phosphatase 22                                       | Upregulated |
| A_22_P000 | 0.024792 | 0.0102   | 1.09 | LINC01405     | long intergenic non-protein coding RNA 1405                           | Upregulated |
| A_23_P203 | 0.025133 | 0.0104   | 1.09 | PSMD9         | proteasome (prosome, macropain) 26S subunit, non-ATPase, 9            | Upregulated |
| A_33_P332 | 0.032347 | 0.0142   | 1.09 | ZNF320        | zinc finger protein 320                                               | Upregulated |
| A_33_P336 | 0.034497 | 0.0153   | 1.09 | ARAF          | A-Raf proto-oncogene, serine/threonine kinase                         | Upregulated |
| A_21_P000 | 0.044049 | 0.0206   | 1.09 | SNORA25       | small nucleolar RNA, H/ACA box 25                                     | Upregulated |
| A_23_P928 | 0.001986 | 0.000296 | 1.08 | SAR1B         | secretion associated, Ras related GTPase 1B                           | Upregulated |
| A_33_P329 | 0.002026 | 0.000307 | 1.08 | TCOF1         | Treacher Collins-Franceschetti syndrome 1                             | Upregulated |
| A_23_P163 | 0.002113 | 0.000331 | 1.08 | EHD4          | EH-domain containing 4                                                | Upregulated |
| A_22_P000 | 0.002166 | 0.000345 | 1.08 | lnc-MRPL39-2  | lnc-MRPL39-2:1                                                        | Upregulated |
| A_33_P332 | 0.002186 | 0.000351 | 1.08 | RGP1          | RGP1 retrograde golgi transport homolog (S. cerevisiae)               | Upregulated |
| A_24_P351 | 0.002191 | 0.000352 | 1.08 | MREG          | melanoregulin                                                         | Upregulated |
| A_33_P324 | 0.002243 | 0.000366 | 1.08 | ADIPOR1       | adiponectin receptor 1                                                | Upregulated |
| A_32_P620 | 0.002243 | 0.000366 | 1.08 | RPL10A        | ribosomal protein L10a                                                | Upregulated |
| A_23_P202 | 0.002439 | 0.000412 | 1.08 | ZBTB44        | zinc finger and BTB domain containing 44                              | Upregulated |
| A_33_P331 | 0.002479 | 0.000423 | 1.08 | PACSN2        | protein kinase C and casein kinase substrate in neurons 2             | Upregulated |
| A_33_P339 | 0.002589 | 0.000454 | 1.08 | USP32         | ubiquitin specific peptidase 32                                       | Upregulated |
| A_23_P164 | 0.002667 | 0.000474 | 1.08 | MMD           | monocyte to macrophage differentiation-associated                     | Upregulated |
| A_32_P311 | 0.002835 | 0.00052  | 1.08 | RPL7          | ribosomal protein L7                                                  | Upregulated |
| A_23_P572 | 0.002888 | 0.000535 | 1.08 | URB1          | URB1 ribosome biogenesis 1 homolog (S. cerevisiae)                    | Upregulated |
| A_23_P134 | 0.003929 | 0.000851 | 1.08 | C7orf50       | chromosome 7 open reading frame 50                                    | Upregulated |
| A_23_P418 | 0.004176 | 0.00093  | 1.08 | TNKS1BP1      | tankyrase 1 binding protein 1, 182kDa                                 | Upregulated |
| A_23_P400 | 0.004913 | 0.00118  | 1.08 | TRMT10B       | tRNA methyltransferase 10 homolog B (S. cerevisiae)                   | Upregulated |
| A_24_P156 | 0.005496 | 0.00139  | 1.08 | LYSMD3        | LysM, putative peptidoglycan-binding, domain containing 3             | Upregulated |
| A_33_P326 | 0.00581  | 0.00151  | 1.08 | CBFA2T2       | core-binding factor, runt domain, alpha subunit 2; translocated to, 2 | Upregulated |
| A_22_P000 | 0.010756 | 0.0035   | 1.08 | LOC1019270    | uncharacterized LOC101927027                                          | Upregulated |
| A_33_P324 | 0.011371 | 0.00378  | 1.08 | PC            | pyruvate carboxylase                                                  | Upregulated |
| A_21_P001 | 0.012852 | 0.00442  | 1.08 | LINC01057     | long intergenic non-protein coding RNA 1057                           | Upregulated |
| A_33_P336 | 0.012907 | 0.00444  | 1.08 | KLHL36        | kelch-like family member 36                                           | Upregulated |
| A_33_P335 | 0.01307  | 0.00452  | 1.08 | TDG           | thymine-DNA glycosylase                                               | Upregulated |
| A_32_P104 | 0.014406 | 0.00514  | 1.08 | DCUN1D3       | DCN1, defective in cullin neddylation 1, domain containing 3          | Upregulated |
| A_23_P428 | 0.014743 | 0.0053   | 1.08 | TTC21A        | tetratricopeptide repeat domain 21A                                   | Upregulated |



|           |          |          |      |                |                                                                      |             |
|-----------|----------|----------|------|----------------|----------------------------------------------------------------------|-------------|
| A_21_P001 | 0.019849 | 0.0077   | 1.08 | LOC1010605     | uncharacterized LOC101060542                                         | Upregulated |
| A_24_P265 | 0.020111 | 0.00783  | 1.08 | NTRK1          | neurotrophic tyrosine kinase, receptor, type 1                       | Upregulated |
| A_22_P000 | 0.026781 | 0.0112   | 1.08 | PSMD5-AS1      | PSMD5 antisense RNA 1 (head to head)                                 | Upregulated |
| A_22_P000 | 0.029356 | 0.0126   | 1.08 | lnc-SPP2-1     | lnc-SPP2-1:1                                                         | Upregulated |
| A_33_P329 | 0.033413 | 0.0147   | 1.08 | TBX5-AS1       | TBX5 antisense RNA 1                                                 | Upregulated |
| A_24_P111 | 0.033779 | 0.0149   | 1.08 | POMT2          | protein-O-mannosyltransferase 2                                      | Upregulated |
| A_23_P106 | 0.037257 | 0.0168   | 1.08 | LCMT2          | leucine carboxyl methyltransferase 2                                 | Upregulated |
| A_22_P000 | 0.038334 | 0.0174   | 1.08 | lnc-TSPAN12    | lnc-TSPAN12-1:1                                                      | Upregulated |
| A_21_P000 | 0.047102 | 0.0223   | 1.08 | lnc-PHF3-4     | lnc-PHF3-4:1                                                         | Upregulated |
| A_23_P219 | 0.048025 | 0.0229   | 1.08 | ZNF3           | zinc finger protein 3                                                | Upregulated |
| A_21_P000 | 0.054726 | 0.0268   | 1.08 | SNORA41        | small nucleolar RNA, H/ACA box 41                                    | Upregulated |
| A_22_P000 | 0.059292 | 0.0294   | 1.08 | lnc-HIATL1-5   | lnc-HIATL1-5:1                                                       | Upregulated |
| A_33_P338 | 0.061982 | 0.0311   | 1.08 | FANCF          | Fanconi anemia, complementation group F                              | Upregulated |
| A_22_P000 | 0.071841 | 0.037    | 1.08 | lnc-PRPF19-1   | lnc-PRPF19-1:1                                                       | Upregulated |
| A_22_P000 | 0.084486 | 0.0451   | 1.08 | lnc-COQ9-1     | lnc-COQ9-1:1                                                         | Upregulated |
| A_23_P329 | 0.085404 | 0.0458   | 1.08 | GREB1          | growth regulation by estrogen in breast cancer 1                     | Upregulated |
| A_24_P673 | 0.002046 | 0.000313 | 1.07 | FABP5          | fatty acid binding protein 5 (psoriasis-associated)                  | Upregulated |
| A_33_P332 | 0.002043 | 0.000313 | 1.07 | FCGR2B         | Fc fragment of IgG, low affinity IIb, receptor (CD32)                | Upregulated |
| A_23_P212 | 0.002253 | 0.000369 | 1.07 | RAB5A          | RAB5A, member RAS oncogene family                                    | Upregulated |
| A_23_P998 | 0.00247  | 0.000421 | 1.07 | FAM214A        | family with sequence similarity 214, member A                        | Upregulated |
| A_33_P342 | 0.002494 | 0.000428 | 1.07 | ZNF770         | zinc finger protein 770                                              | Upregulated |
| A_23_P214 | 0.002693 | 0.000481 | 1.07 | PERP           | PERP, TP53 apoptosis effector                                        | Upregulated |
| A_23_P117 | 0.002724 | 0.00049  | 1.07 | AHSA1          | AHA1, activator of heat shock 90kDa protein ATPase homolog 1 (yeast) | Upregulated |
| A_33_P327 | 0.002761 | 0.0005   | 1.07 | PPP1R14B       | protein phosphatase 1, regulatory (inhibitor) subunit 14B            | Upregulated |
| A_23_P115 | 0.003248 | 0.000643 | 1.07 | SZRD1          | SUZ RNA binding domain containing 1                                  | Upregulated |
| A_23_P147 | 0.003401 | 0.000689 | 1.07 | TSEN54         | TSEN54 tRNA splicing endonuclease subunit                            | Upregulated |
| A_33_P327 | 0.003527 | 0.000725 | 1.07 | RNF126         | ring finger protein 126                                              | Upregulated |
| A_23_P117 | 0.003703 | 0.00078  | 1.07 | BAHD1          | bromo adjacent homology domain containing 1                          | Upregulated |
| A_24_P113 | 0.004238 | 0.000953 | 1.07 | ZNHIT6         | zinc finger, HIT-type containing 6                                   | Upregulated |
| A_23_P341 | 0.004262 | 0.00096  | 1.07 | IDH3G          | isocitrate dehydrogenase 3 (NAD+) gamma                              | Upregulated |
| A_21_P001 | 0.005008 | 0.00122  | 1.07 | XLOC_l2_012802 |                                                                      | Upregulated |
| A_23_P214 | 0.005327 | 0.00133  | 1.07 | EXOC2          | exocyst complex component 2                                          | Upregulated |
| A_33_P325 | 0.006386 | 0.00173  | 1.07 | RNF38          | ring finger protein 38                                               | Upregulated |
| A_24_P325 | 0.006513 | 0.00178  | 1.07 | RNF214         | ring finger protein 214                                              | Upregulated |
| A_33_P327 | 0.006811 | 0.00189  | 1.07 | PHF20L1        | PHD finger protein 20-like 1                                         | Upregulated |
| A_33_P333 | 0.007028 | 0.00198  | 1.07 | GLIS2          | GLIS family zinc finger 2                                            | Upregulated |
| A_33_P338 | 0.008115 | 0.00241  | 1.07 | SIKE1          | suppressor of IKBKE 1                                                | Upregulated |

|           |          |          |      |                |                                                                    |             |
|-----------|----------|----------|------|----------------|--------------------------------------------------------------------|-------------|
| A_22_P000 | 0.008157 | 0.00243  | 1.07 | lnc-EMX2-3     | lnc-EMX2-3:1                                                       | Upregulated |
| A_23_P559 | 0.009803 | 0.00311  | 1.07 | NAPA           | N-ethylmaleimide-sensitive factor attachment protein, alpha        | Upregulated |
| A_24_P162 | 0.009878 | 0.00314  | 1.07 | ERC1           | ELKS/RAB6-interacting/CAST family member 1                         | Upregulated |
| A_33_P338 | 0.010424 | 0.00337  | 1.07 | TAT-AS1        | TAT antisense RNA 1                                                | Upregulated |
| A_24_P322 | 0.012389 | 0.00422  | 1.07 | DIDO1          | death inducer-obliterator 1                                        | Upregulated |
| A_23_P933 | 0.012465 | 0.00425  | 1.07 | NUDT3          | nudix (nucleoside diphosphate linked moiety X)-type motif 3        | Upregulated |
| A_23_P169 | 0.018847 | 0.00722  | 1.07 | ORM1           | orosomuroid 1                                                      | Upregulated |
| A_32_P578 | 0.020454 | 0.00799  | 1.07 | RNF157         | ring finger protein 157                                            | Upregulated |
| A_33_P324 | 0.027772 | 0.0117   | 1.07 | CSMD2          | CUB and Sushi multiple domains 2                                   | Upregulated |
| A_33_P324 | 0.041151 | 0.019    | 1.07 | RBM12B         | RNA binding motif protein 12B                                      | Upregulated |
| A_22_P000 | 0.048413 | 0.0231   | 1.07 | lnc-TLCD1-1    | lnc-TLCD1-1:1                                                      | Upregulated |
| A_24_P205 | 0.065493 | 0.0331   | 1.07 | SHMT1          | serine hydroxymethyltransferase 1 (soluble)                        | Upregulated |
| A_21_P000 | 0.069437 | 0.0355   | 1.07 | LOC1027247     | uncharacterized LOC102724732                                       | Upregulated |
| A_21_P001 | 0.089753 | 0.0486   | 1.07 | XLOC_I2_014830 |                                                                    | Upregulated |
| A_22_P000 | 0.002062 | 0.000317 | 1.06 | VASH1          | vasohibin 1                                                        | Upregulated |
| A_33_P329 | 0.002238 | 0.000364 | 1.06 | NAA35          | N(alpha)-acetyltransferase 35, NatC auxiliary subunit              | Upregulated |
| A_23_P118 | 0.002347 | 0.00039  | 1.06 | SUMO2          | small ubiquitin-like modifier 2                                    | Upregulated |
| A_33_P335 | 0.002395 | 0.000403 | 1.06 | ARCN1          | archain 1                                                          | Upregulated |
| A_33_P380 | 0.002471 | 0.000421 | 1.06 | DNAJA1P5       | DnaJ (Hsp40) homolog, subfamily A, member 1 pseudogene 5           | Upregulated |
| A_23_P354 | 0.002624 | 0.000463 | 1.06 | LYST           | lysosomal trafficking regulator                                    | Upregulated |
| A_23_P881 | 0.002657 | 0.000471 | 1.06 | HSPH1          | heat shock 105kDa/110kDa protein 1                                 | Upregulated |
| A_33_P335 | 0.002872 | 0.00053  | 1.06 | MTA1           | metastasis associated 1                                            | Upregulated |
| A_23_P121 | 0.002963 | 0.000557 | 1.06 | THG1L          | tRNA-histidine guanylyltransferase 1-like ( <i>S. cerevisiae</i> ) | Upregulated |
| A_33_P323 | 0.003008 | 0.00057  | 1.06 | MAP2K3         | mitogen-activated protein kinase kinase 3                          | Upregulated |
| A_23_P648 | 0.003428 | 0.000696 | 1.06 | SELPLG         | selectin P ligand                                                  | Upregulated |
| A_23_P387 | 0.00411  | 0.000907 | 1.06 | MICB           | MHC class I polypeptide-related sequence B                         | Upregulated |
| A_24_P398 | 0.004951 | 0.00119  | 1.06 | TRIM34         | tripartite motif containing 34                                     | Upregulated |
| A_24_P115 | 0.005608 | 0.00144  | 1.06 | DAGLA          | diacylglycerol lipase, alpha                                       | Upregulated |
| A_33_P339 | 0.005608 | 0.00144  | 1.06 | PCDHGA5        | protocadherin gamma subfamily A, 5                                 | Upregulated |
| A_23_P771 | 0.007727 | 0.00226  | 1.06 | RNF111         | ring finger protein 111                                            | Upregulated |
| A_23_P102 | 0.01557  | 0.00568  | 1.06 | CHD6           | chromodomain helicase DNA binding protein 6                        | Upregulated |
| A_22_P000 | 0.017477 | 0.00658  | 1.06 | LINC00648      | long intergenic non-protein coding RNA 648                         | Upregulated |
| A_33_P331 | 0.017999 | 0.00682  | 1.06 | ANO7           | anoctamin 7                                                        | Upregulated |
| A_23_P906 | 0.022678 | 0.00907  | 1.06 | STRADB         | STE20-related kinase adaptor beta                                  | Upregulated |
| A_22_P000 | 0.030594 | 0.0132   | 1.06 | lnc-INPP5F-1   | lnc-INPP5F-1:1                                                     | Upregulated |
| A_33_P331 | 0.035881 | 0.0161   | 1.06 | METTL4         | methyltransferase like 4                                           | Upregulated |
| A_23_P933 | 0.052653 | 0.0255   | 1.06 | DDR1           | discoidin domain receptor tyrosine kinase 1                        | Upregulated |

|           |          |          |      |              |                                                        |             |
|-----------|----------|----------|------|--------------|--------------------------------------------------------|-------------|
| A_23_P107 | 0.002078 | 0.000322 | 1.05 | RPA1         | replication protein A1, 70kDa                          | Upregulated |
| A_23_P252 | 0.002144 | 0.00034  | 1.05 | MRPS30       | mitochondrial ribosomal protein S30                    | Upregulated |
| A_23_P725 | 0.00215  | 0.000341 | 1.05 | AIFM1        | apoptosis-inducing factor, mitochondrion-associated, 1 | Upregulated |
| A_32_P830 | 0.002196 | 0.000353 | 1.05 | EFR3B        | EFR3 homolog B ( <i>S. cerevisiae</i> )                | Upregulated |
| A_22_P000 | 0.002224 | 0.00036  | 1.05 | LOC1027240   | uncharacterized LOC102724096                           | Upregulated |
| A_22_P000 | 0.002337 | 0.000387 | 1.05 | LINC00944    | long intergenic non-protein coding RNA 944             | Upregulated |
| A_23_P370 | 0.002491 | 0.000427 | 1.05 | SMIM4        | small integral membrane protein 4                      | Upregulated |
| A_22_P000 | 0.002757 | 0.000499 | 1.05 | lnc-LEO1-4   | lnc-LEO1-4:1                                           | Upregulated |
| A_21_P001 | 0.002813 | 0.000514 | 1.05 | LOC729218    | uncharacterized LOC729218                              | Upregulated |
| A_24_P641 | 0.002921 | 0.000544 | 1.05 | CPNE3        | copine III                                             | Upregulated |
| A_33_P338 | 0.003054 | 0.000584 | 1.05 | NOP14        | NOP14 nucleolar protein                                | Upregulated |
| A_32_P180 | 0.003057 | 0.000585 | 1.05 | LOC728323    | uncharacterized LOC728323                              | Upregulated |
| A_33_P341 | 0.003084 | 0.000593 | 1.05 | OXTR         | oxytocin receptor                                      | Upregulated |
| A_21_P000 | 0.004247 | 0.000956 | 1.05 | lnc-VKORC1L  | lnc-VKORC1L1-1:1                                       | Upregulated |
| A_33_P329 | 0.00429  | 0.00097  | 1.05 | PARP1        | poly (ADP-ribose) polymerase 1                         | Upregulated |
| A_23_P201 | 0.004843 | 0.00116  | 1.05 | ARPC1B       | actin related protein 2/3 complex, subunit 1B, 41kDa   | Upregulated |
| A_23_P257 | 0.004939 | 0.00119  | 1.05 | HCCS         | holocytochrome c synthase                              | Upregulated |
| A_22_P000 | 0.005194 | 0.00128  | 1.05 | lnc-ZRANB1-2 | lnc-ZRANB1-2:1                                         | Upregulated |
| A_33_P326 | 0.005191 | 0.00128  | 1.05 | SAMD9L       | sterile alpha motif domain containing 9-like           | Upregulated |
| A_33_P338 | 0.005253 | 0.00131  | 1.05 | FAM222B      | family with sequence similarity 222, member B          | Upregulated |
| A_33_P346 | 0.005653 | 0.00145  | 1.05 | LOC286154    | uncharacterized LOC286154                              | Upregulated |
| A_24_P341 | 0.006994 | 0.00197  | 1.05 | TMEM75       | transmembrane protein 75                               | Upregulated |
| A_23_P315 | 0.007563 | 0.00219  | 1.05 | EMX1         | empty spiracles homeobox 1                             | Upregulated |
| A_33_P334 | 0.0083   | 0.00249  | 1.05 | SYNGR2       | synaptogyrin 2                                         | Upregulated |
| A_21_P000 | 0.009143 | 0.00284  | 1.05 | lnc-CRISP2-1 | lnc-CRISP2-1:1                                         | Upregulated |
| A_21_P000 | 0.010096 | 0.00323  | 1.05 | lnc-SYNDIG1  | lnc-SYNDIG1-4:1                                        | Upregulated |
| A_33_P332 | 0.012926 | 0.00445  | 1.05 | PLXNA4       | plexin A4                                              | Upregulated |
| A_21_P000 | 0.014243 | 0.00506  | 1.05 | lnc-ADCY2-1  | lnc-ADCY2-1:1                                          | Upregulated |
| A_33_P333 | 0.015437 | 0.00562  | 1.05 | RTCA         | RNA 3'-terminal phosphate cyclase                      | Upregulated |
| A_22_P000 | 0.016738 | 0.00624  | 1.05 | RFESD        | Rieske (Fe-S) domain containing                        | Upregulated |
| A_23_P432 | 0.021482 | 0.00848  | 1.05 | CCDC117      | coiled-coil domain containing 117                      | Upregulated |
| A_33_P325 | 0.027925 | 0.0118   | 1.05 | GRIP1        | glutamate receptor interacting protein 1               | Upregulated |
| A_33_P327 | 0.036788 | 0.0166   | 1.05 | SPATA21      | spermatogenesis associated 21                          | Upregulated |
| A_33_P338 | 0.045923 | 0.0217   | 1.05 | ZNF511       | zinc finger protein 511                                | Upregulated |
| A_33_P325 | 0.080564 | 0.0425   | 1.05 | PLAC9        | placenta-specific 9                                    | Upregulated |
| A_32_P191 | 0.080627 | 0.0426   | 1.05 | SCGB2B2      | secretoglobin, family 2B, member 2                     | Upregulated |
| A_22_P000 | 0.089781 | 0.0487   | 1.05 | lnc-GPN2-1   | lnc-GPN2-1:1                                           | Upregulated |

|           |          |          |      |              |                                                                              |             |
|-----------|----------|----------|------|--------------|------------------------------------------------------------------------------|-------------|
| A_33_P324 | 0.002439 | 0.000412 | 1.04 | CD69         | CD69 molecule                                                                | Upregulated |
| A_19_P003 | 0.00248  | 0.000424 | 1.04 | SNHG5        | small nucleolar RNA host gene 5 (non-protein coding)                         | Upregulated |
| A_21_P000 | 0.002503 | 0.000431 | 1.04 | lnc-AL669831 | lnc-AL669831.1-4:1                                                           | Upregulated |
| A_23_P351 | 0.002649 | 0.000469 | 1.04 | TAF13        | TAF13 RNA polymerase II, TATA box binding protein (TBP)-associated factor 13 | Upregulated |
| A_23_P887 | 0.00284  | 0.000522 | 1.04 | RAD51        | RAD51 recombinase                                                            | Upregulated |
| A_23_P156 | 0.002967 | 0.000558 | 1.04 | LNPEP        | leucyl/cystinyl aminopeptidase                                               | Upregulated |
| A_24_P230 | 0.003022 | 0.000575 | 1.04 | CCDC137      | coiled-coil domain containing 137                                            | Upregulated |
| A_23_P312 | 0.003057 | 0.000585 | 1.04 | TUBB4B       | tubulin, beta 4B class IVb                                                   | Upregulated |
| A_24_P144 | 0.003398 | 0.000688 | 1.04 | RNF6         | ring finger protein (C3H2C3 type) 6                                          | Upregulated |
| A_23_P149 | 0.003516 | 0.000722 | 1.04 | SDHB         | succinate dehydrogenase complex, subunit B, iron sulfur (lp)                 | Upregulated |
| A_21_P000 | 0.003564 | 0.000738 | 1.04 | lnc-KIF20B-5 | lnc-KIF20B-5:1                                                               | Upregulated |
| A_23_P169 | 0.003574 | 0.000743 | 1.04 | CDK9         | cyclin-dependent kinase 9                                                    | Upregulated |
| A_24_P488 | 0.003904 | 0.000843 | 1.04 | SNAP29       | synaptosomal-associated protein, 29kDa                                       | Upregulated |
| A_33_P322 | 0.004183 | 0.000932 | 1.04 | ZNF284       | zinc finger protein 284                                                      | Upregulated |
| A_32_P149 | 0.00422  | 0.000947 | 1.04 | LINC00515    | long intergenic non-protein coding RNA 515                                   | Upregulated |
| A_24_P241 | 0.004294 | 0.000971 | 1.04 | EXOSC8       | exosome component 8                                                          | Upregulated |
| A_24_P767 | 0.004641 | 0.00109  | 1.04 | CC2D1B       | coiled-coil and C2 domain containing 1B                                      | Upregulated |
| A_32_P199 | 0.004648 | 0.00109  | 1.04 | TFDP1        | transcription factor Dp-1                                                    | Upregulated |
| A_19_P003 | 0.005773 | 0.0015   | 1.04 | ZSWIM6       | zinc finger, SWIM-type containing 6                                          | Upregulated |
| A_32_P144 | 0.006725 | 0.00186  | 1.04 | ZNF518B      | zinc finger protein 518B                                                     | Upregulated |
| A_21_P000 | 0.009922 | 0.00316  | 1.04 | lnc-CTAGE5-1 | lnc-CTAGE5-1:5                                                               | Upregulated |
| A_23_P347 | 0.016148 | 0.00595  | 1.04 | MOB1B        | MOB kinase activator 1B                                                      | Upregulated |
| A_21_P000 | 0.017109 | 0.00641  | 1.04 | lnc-RP11-597 | lnc-RP11-597K23.2.1-2:1                                                      | Upregulated |
| A_24_P199 | 0.020609 | 0.00806  | 1.04 | VPS54        | vacuolar protein sorting 54 homolog (S. cerevisiae)                          | Upregulated |
| A_21_P000 | 0.024291 | 0.00993  | 1.04 | lnc-SREK1-1  | lnc-SREK1-1:4                                                                | Upregulated |
| A_23_P467 | 0.032859 | 0.0144   | 1.04 | EPC1         | enhancer of polycomb homolog 1 (Drosophila)                                  | Upregulated |
| A_21_P000 | 0.041057 | 0.0189   | 1.04 | HCG14        | HLA complex group 14 (non-protein coding)                                    | Upregulated |
| A_23_P250 | 0.044142 | 0.0207   | 1.04 | IGF2BP2      | insulin-like growth factor 2 mRNA binding protein 2                          | Upregulated |
| A_22_P000 | 0.045941 | 0.0217   | 1.04 | lnc-TRPM2-1  | lnc-TRPM2-1:1                                                                | Upregulated |
| A_23_P383 | 0.048442 | 0.0231   | 1.04 | SNAPC5       | small nuclear RNA activating complex, polypeptide 5, 19kDa                   | Upregulated |
| A_21_P000 | 0.051415 | 0.0248   | 1.04 | lnc-CCND1-1  | lnc-CCND1-1:1                                                                | Upregulated |
| A_19_P003 | 0.085527 | 0.0459   | 1.04 | APCDD1L-AS   | APCDD1L antisense RNA 1 (head to head)                                       | Upregulated |
| A_23_P475 | 0.002197 | 0.000353 | 1.03 | LDHA         | lactate dehydrogenase A                                                      | Upregulated |
| A_21_P000 | 0.00226  | 0.00037  | 1.03 | ATP1A1-AS1   | ATP1A1 antisense RNA 1                                                       | Upregulated |
| A_33_P320 | 0.00232  | 0.000383 | 1.03 | CD58         | CD58 molecule                                                                | Upregulated |
| A_23_P115 | 0.00238  | 0.000398 | 1.03 | HPS6         | Hermansky-Pudlak syndrome 6                                                  | Upregulated |
| A_23_P134 | 0.002478 | 0.000423 | 1.03 | MAP3K5       | mitogen-activated protein kinase kinase kinase 5                             | Upregulated |

|           |          |          |      |                |                                                                       |             |
|-----------|----------|----------|------|----------------|-----------------------------------------------------------------------|-------------|
| A_33_P336 | 0.002508 | 0.000432 | 1.03 | NAMPT          | nicotinamide phosphoribosyltransferase                                | Upregulated |
| A_33_P330 | 0.00255  | 0.000443 | 1.03 | SRSF10         | serine/arginine-rich splicing factor 10                               | Upregulated |
| A_19_P003 | 0.002592 | 0.000454 | 1.03 | SNHG5          | small nucleolar RNA host gene 5 (non-protein coding)                  | Upregulated |
| A_23_P245 | 0.002644 | 0.000468 | 1.03 | C11orf57       | chromosome 11 open reading frame 57                                   | Upregulated |
| A_21_P000 | 0.002734 | 0.000492 | 1.03 | lnc-PMFBP1-2   | lnc-PMFBP1-2:1                                                        | Upregulated |
| A_33_P324 | 0.002888 | 0.000535 | 1.03 | SLC4A5         | solute carrier family 4 (sodium bicarbonate cotransporter), member 5  | Upregulated |
| A_23_P828 | 0.003738 | 0.000792 | 1.03 | IFNGR1         | interferon gamma receptor 1                                           | Upregulated |
| A_33_P325 | 0.004106 | 0.000906 | 1.03 | MFHAS1         | malignant fibrous histiocytoma amplified sequence 1                   | Upregulated |
| A_23_P395 | 0.004313 | 0.000978 | 1.03 | FBXO31         | F-box protein 31                                                      | Upregulated |
| A_33_P341 | 0.004786 | 0.00114  | 1.03 | SNX8           | sorting nexin 8                                                       | Upregulated |
| A_23_P500 | 0.005029 | 0.00122  | 1.03 | B3GNT2         | UDP-GlcNAc:betaGal beta-1,3-N-acetylglucosaminyltransferase 2         | Upregulated |
| A_23_P309 | 0.005241 | 0.0013   | 1.03 | HIST2H2AA4     | histone cluster 2, H2aa4                                              | Upregulated |
| A_23_P251 | 0.005278 | 0.00132  | 1.03 | CHRNA2         | cholinergic receptor, nicotinic, alpha 2 (neuronal)                   | Upregulated |
| A_24_P247 | 0.005925 | 0.00155  | 1.03 | ZNF589         | zinc finger protein 589                                               | Upregulated |
| A_22_P000 | 0.006513 | 0.00178  | 1.03 | lnc-DHRS7B-3   | lnc-DHRS7B-3:1                                                        | Upregulated |
| A_24_P861 | 0.007422 | 0.00213  | 1.03 | BRWD1          | bromodomain and WD repeat domain containing 1                         | Upregulated |
| A_33_P377 | 0.008914 | 0.00274  | 1.03 | KRT8P12        | keratin 8 pseudogene 12                                               | Upregulated |
| A_22_P000 | 0.009695 | 0.00306  | 1.03 | ANKRD44-IT1    | ANKRD44 intronic transcript 1 (non-protein coding)                    | Upregulated |
| A_23_P713 | 0.00982  | 0.00312  | 1.03 | CCDC25         | coiled-coil domain containing 25                                      | Upregulated |
| A_21_P000 | 0.010993 | 0.0036   | 1.03 | SNORA68        | small nucleolar RNA, H/ACA box 68                                     | Upregulated |
| A_23_P148 | 0.014554 | 0.0052   | 1.03 | FTHL17         | ferritin, heavy polypeptide-like 17                                   | Upregulated |
| A_23_P413 | 0.015515 | 0.00566  | 1.03 | HAUS1          | HAUS augmin-like complex, subunit 1                                   | Upregulated |
| A_33_P325 | 0.016087 | 0.00592  | 1.03 | MEG3           | maternally expressed 3 (non-protein coding)                           | Upregulated |
| A_32_P103 | 0.016795 | 0.00627  | 1.03 | B4GALT4        | UDP-Gal:betaGlcNAc beta 1,4- galactosyltransferase, polypeptide 4     | Upregulated |
| A_22_P000 | 0.027449 | 0.0116   | 1.03 | lnc-PABPC4-1   | lnc-PABPC4-1:1                                                        | Upregulated |
| A_22_P000 | 0.031596 | 0.0137   | 1.03 | ABO            | ABO blood group (transferase A, alpha 1-3-N-acetylgalactosaminyltrans | Upregulated |
| A_21_P000 | 0.031596 | 0.0137   | 1.03 | lnc-C17orf58-5 | lnc-C17orf58-5:1                                                      | Upregulated |
| A_24_P226 | 0.031962 | 0.0139   | 1.03 | FGFBP2         | fibroblast growth factor binding protein 2                            | Upregulated |
| A_22_P000 | 0.031962 | 0.0139   | 1.03 | lnc-HEPH-2     | lnc-HEPH-2:1                                                          | Upregulated |
| A_21_P000 | 0.031962 | 0.0139   | 1.03 | lnc-OR5H15-1   | lnc-OR5H15-1:1                                                        | Upregulated |
| A_23_P336 | 0.037331 | 0.0169   | 1.03 | GEMIN5         | gem (nuclear organelle) associated protein 5                          | Upregulated |
| A_24_P626 | 0.086889 | 0.0468   | 1.03 | MUC3           | intestinal mucin-like                                                 | Upregulated |
| A_33_P332 | 0.002311 | 0.000381 | 1.02 | HSPE1          | heat shock 10kDa protein 1                                            | Upregulated |
| A_23_P116 | 0.002369 | 0.000396 | 1.02 | LGALS9         | lectin, galactoside-binding, soluble, 9                               | Upregulated |
| A_23_P359 | 0.002515 | 0.000434 | 1.02 | NFAT5          | nuclear factor of activated T-cells 5, tonicity-responsive            | Upregulated |
| A_33_P335 | 0.002561 | 0.000446 | 1.02 | COQ10B         | coenzyme Q10 homolog B (S. cerevisiae)                                | Upregulated |
| A_33_P326 | 0.002618 | 0.000461 | 1.02 | WIBG           | within bgcn homolog (Drosophila)                                      | Upregulated |

|           |          |          |      |               |                                                               |             |
|-----------|----------|----------|------|---------------|---------------------------------------------------------------|-------------|
| A_33_P336 | 0.002676 | 0.000476 | 1.02 | EIF1AX        | eukaryotic translation initiation factor 1A, X-linked         | Upregulated |
| A_21_P000 | 0.002876 | 0.000532 | 1.02 | lnc-LHX2-1    | lnc-LHX2-1:1                                                  | Upregulated |
| A_23_P321 | 0.00293  | 0.000546 | 1.02 | BCL2A1        | BCL2-related protein A1                                       | Upregulated |
| A_23_P304 | 0.003096 | 0.000596 | 1.02 | CHRNE         | cholinergic receptor, nicotinic, epsilon (muscle)             | Upregulated |
| A_23_P354 | 0.003125 | 0.000606 | 1.02 | KCTD11        | potassium channel tetramerization domain containing 11        | Upregulated |
| A_24_P101 | 0.003335 | 0.000669 | 1.02 | PDIA3         | protein disulfide isomerase family A, member 3                | Upregulated |
| A_33_P323 | 0.003392 | 0.000686 | 1.02 | SBDS          | Shwachman-Bodian-Diamond syndrome                             | Upregulated |
| A_22_P000 | 0.003638 | 0.00076  | 1.02 | lnc-CCDC7-4   | lnc-CCDC7-4:1                                                 | Upregulated |
| A_23_P611 | 0.003798 | 0.00081  | 1.02 | SEC23B        | Sec23 homolog B ( <i>S. cerevisiae</i> )                      | Upregulated |
| A_23_P251 | 0.004094 | 0.000902 | 1.02 | FKBP11        | FK506 binding protein 11, 19 kDa                              | Upregulated |
| A_23_P194 | 0.004524 | 0.00105  | 1.02 | DDAH2         | dimethylarginine dimethylaminohydrolase 2                     | Upregulated |
| A_33_P331 | 0.004589 | 0.00107  | 1.02 | RHOG          | ras homolog family member G                                   | Upregulated |
| A_23_P945 | 0.004744 | 0.00112  | 1.02 | POLR1E        | polymerase (RNA) I polypeptide E, 53kDa                       | Upregulated |
| A_33_P323 | 0.005113 | 0.00125  | 1.02 | ALG11         | ALG11, alpha-1,2-mannosyltransferase                          | Upregulated |
| A_33_P333 | 0.005207 | 0.00129  | 1.02 | SEC24A        | SEC24 family member A                                         | Upregulated |
| A_22_P000 | 0.00576  | 0.00149  | 1.02 | lnc-ARHGAP1   | lnc-ARHGAP17-1:1                                              | Upregulated |
| A_33_P333 | 0.005832 | 0.00152  | 1.02 | MSTO1         | misato 1, mitochondrial distribution and morphology regulator | Upregulated |
| A_19_P003 | 0.00608  | 0.00161  | 1.02 | TDRG1         | testis development related 1 (non-protein coding)             | Upregulated |
| A_23_P436 | 0.008013 | 0.00237  | 1.02 | RBM34         | RNA binding motif protein 34                                  | Upregulated |
| A_21_P000 | 0.009032 | 0.00279  | 1.02 | LOC646938     | TBC1 domain family, member 2B pseudogene                      | Upregulated |
| A_21_P000 | 0.009869 | 0.00314  | 1.02 | lnc-BATF3-2   | lnc-BATF3-2:7                                                 | Upregulated |
| A_33_P325 | 0.010129 | 0.00325  | 1.02 | PPIL4         | peptidylprolyl isomerase (cyclophilin)-like 4                 | Upregulated |
| A_33_P326 | 0.012589 | 0.0043   | 1.02 | CYP26C1       | cytochrome P450, family 26, subfamily C, polypeptide 1        | Upregulated |
| A_24_P296 | 0.014395 | 0.00513  | 1.02 | ZMIZ2         | zinc finger, MIZ-type containing 2                            | Upregulated |
| A_23_P206 | 0.018666 | 0.00714  | 1.02 | AEN           | apoptosis enhancing nuclease                                  | Upregulated |
| A_23_P748 | 0.022067 | 0.00877  | 1.02 | GJA9          | gap junction protein, alpha 9, 59kDa                          | Upregulated |
| A_33_P322 | 0.031643 | 0.0138   | 1.02 | PCNXL4        | pecanex-like 4 ( <i>Drosophila</i> )                          | Upregulated |
| A_23_P170 | 0.033989 | 0.015    | 1.02 | MRPL12        | mitochondrial ribosomal protein L12                           | Upregulated |
| A_22_P000 | 0.069042 | 0.0353   | 1.02 | lnc-ADRB1-2   | lnc-ADRB1-2:1                                                 | Upregulated |
| A_21_P000 | 0.071036 | 0.0365   | 1.02 | lnc-FBXO32-1  | lnc-FBXO32-1:1                                                | Upregulated |
| A_22_P000 | 0.0822   | 0.0435   | 1.02 | LINC00316     | long intergenic non-protein coding RNA 316                    | Upregulated |
| A_21_P000 | 0.089984 | 0.0488   | 1.02 | lnc-C7orf41-1 | lnc-C7orf41-1:1                                               | Upregulated |
| A_33_P330 | 0.002353 | 0.000391 | 1.01 | RPS5          | ribosomal protein S5                                          | Upregulated |
| A_22_P000 | 0.002357 | 0.000392 | 1.01 | lnc-HLA-DMA   | lnc-HLA-DMA-1:1                                               | Upregulated |
| A_23_P350 | 0.002504 | 0.000431 | 1.01 | TET2          | tet methylcytosine dioxygenase 2                              | Upregulated |
| A_23_P920 | 0.002517 | 0.000434 | 1.01 | SETD5         | SET domain containing 5                                       | Upregulated |
| A_23_P102 | 0.002528 | 0.000437 | 1.01 | CTSE          | cathepsin E                                                   | Upregulated |

|           |          |          |      |              |                                                                            |             |
|-----------|----------|----------|------|--------------|----------------------------------------------------------------------------|-------------|
| A_33_P321 | 0.002746 | 0.000496 | 1.01 | NCF1         | neutrophil cytosolic factor 1                                              | Upregulated |
| A_33_P342 | 0.00275  | 0.000497 | 1.01 | TP53INP1     | tumor protein p53 inducible nuclear protein 1                              | Upregulated |
| A_32_P326 | 0.00281  | 0.000513 | 1.01 | KRR1         | KRR1, small subunit (SSU) processome component, homolog (yeast)            | Upregulated |
| A_33_P323 | 0.003106 | 0.0006   | 1.01 | ZNF497       | zinc finger protein 497                                                    | Upregulated |
| A_23_P209 | 0.003415 | 0.000693 | 1.01 | ATL2         | atlastin GTPase 2                                                          | Upregulated |
| A_24_P272 | 0.003497 | 0.000716 | 1.01 | SCIMP        | SLP adaptor and CSK interacting membrane protein                           | Upregulated |
| A_33_P322 | 0.00532  | 0.00133  | 1.01 | AMZ2         | archaelysin family metallopeptidase 2                                      | Upregulated |
| A_23_P318 | 0.006955 | 0.00195  | 1.01 | PLEKHA8      | pleckstrin homology domain containing, family A (phosphoinositide binding) | Upregulated |
| A_23_P166 | 0.00901  | 0.00278  | 1.01 | OSM          | oncostatin M                                                               | Upregulated |
| A_33_P335 | 0.011555 | 0.00386  | 1.01 | LOC1009962   | uncharacterized LOC100996273                                               | Upregulated |
| A_22_P000 | 0.011641 | 0.0039   | 1.01 | LOC1027245   | uncharacterized LOC102724596                                               | Upregulated |
| A_23_P388 | 0.015066 | 0.00545  | 1.01 | DMAP1        | DNA methyltransferase 1 associated protein 1                               | Upregulated |
| A_21_P000 | 0.015066 | 0.00545  | 1.01 | lnc-SBDS-8   | lnc-SBDS-8:1                                                               | Upregulated |
| A_33_P326 | 0.01536  | 0.00558  | 1.01 | RFX3         | regulatory factor X, 3 (influences HLA class II expression)                | Upregulated |
| A_21_P000 | 0.017465 | 0.00658  | 1.01 | lnc-FAM153C  | lnc-FAM153C-3:1                                                            | Upregulated |
| A_33_P332 | 0.017976 | 0.00681  | 1.01 | DENND3       | DENN/MADD domain containing 3                                              | Upregulated |
| A_33_P339 | 0.025963 | 0.0108   | 1.01 | LOC1001297   | uncharacterized LOC100129785                                               | Upregulated |
| A_22_P000 | 0.034547 | 0.0153   | 1.01 | lnc-ACOX3-3  | lnc-ACOX3-3:1                                                              | Upregulated |
| A_21_P001 | 0.04387  | 0.0205   | 1.01 | ANKRD20A5f   | ankyrin repeat domain 20 family, member A5, pseudogene                     | Upregulated |
| A_21_P001 | 0.063582 | 0.032    | 1.01 | ANKRD20A2    | ankyrin repeat domain 20 family, member A2                                 | Upregulated |
| A_21_P000 | 0.064668 | 0.0326   | 1.01 | lnc-ZNF487P- | lnc-ZNF487P-1:1                                                            | Upregulated |
| A_22_P000 | 0.072556 | 0.0374   | 1.01 | lnc-QPCT-3   | lnc-QPCT-3:4                                                               | Upregulated |
| A_22_P000 | 0.002356 | 0.000392 | 1    | DNAJC27-AS   | DNAJC27 antisense RNA 1                                                    | Upregulated |
| A_21_P001 | 0.002445 | 0.000414 | 1    | EIF4A1       | eukaryotic translation initiation factor 4A1                               | Upregulated |
| A_32_P447 | 0.002495 | 0.000428 | 1    | C9orf85      | chromosome 9 open reading frame 85                                         | Upregulated |
| A_24_P295 | 0.002853 | 0.000525 | 1    | BLOC1S2      | biogenesis of lysosomal organelles complex-1, subunit 2                    | Upregulated |
| A_33_P330 | 0.002853 | 0.000525 | 1    | RWDD1        | RWD domain containing 1                                                    | Upregulated |
| A_23_P206 | 0.002872 | 0.000531 | 1    | WWP2         | WW domain containing E3 ubiquitin protein ligase 2                         | Upregulated |
| A_24_P942 | 0.002881 | 0.000533 | 1    | KDM6B        | lysine (K)-specific demethylase 6B                                         | Upregulated |
| A_33_P333 | 0.002882 | 0.000534 | 1    | POLR1C       | polymerase (RNA) I polypeptide C, 30kDa                                    | Upregulated |
| A_23_P387 | 0.002989 | 0.000565 | 1    | TUBB         | tubulin, beta class I                                                      | Upregulated |
| A_21_P000 | 0.003081 | 0.000592 | 1    | RPS3A        | ribosomal protein S3A                                                      | Upregulated |
| A_33_P321 | 0.003175 | 0.000622 | 1    | ZWINT        | ZW10 interacting kinetochore protein                                       | Upregulated |
| A_23_P123 | 0.004455 | 0.00103  | 1    | LRSAM1       | leucine rich repeat and sterile alpha motif containing 1                   | Upregulated |
| A_22_P000 | 0.005537 | 0.00141  | 1    | lnc-HDDC2-5  | lnc-HDDC2-5:3                                                              | Upregulated |
| A_23_P426 | 0.006757 | 0.00187  | 1    | SH3BP5L      | SH3-binding domain protein 5-like                                          | Upregulated |
| A_24_P125 | 0.009895 | 0.00315  | 1    | BCCIP        | BRCA2 and CDKN1A interacting protein                                       | Upregulated |

|           |          |          |    |              |                                                                          |               |
|-----------|----------|----------|----|--------------|--------------------------------------------------------------------------|---------------|
| A_33_P660 | 0.010112 | 0.00324  | 1  | YTHDF3       | YTH N(6)-methyladenosine RNA binding protein 3                           | Upregulated   |
| A_22_P000 | 0.011014 | 0.00361  | 1  | INTS6-AS1    | INTS6 antisense RNA 1                                                    | Upregulated   |
| A_23_P343 | 0.013026 | 0.0045   | 1  | PARP11       | poly (ADP-ribose) polymerase family, member 11                           | Upregulated   |
| A_32_P132 | 0.01568  | 0.00573  | 1  | FAM86JP      | family with sequence similarity 86, member A pseudogene                  | Upregulated   |
| A_22_P000 | 0.016357 | 0.00606  | 1  | LOC115110    | uncharacterized LOC115110                                                | Upregulated   |
| A_33_P328 | 0.020165 | 0.00785  | 1  | LRFN4        | leucine rich repeat and fibronectin type III domain containing 4         | Upregulated   |
| A_33_P331 | 0.023452 | 0.00947  | 1  | LONP1        | lon peptidase 1, mitochondrial                                           | Upregulated   |
| A_23_P321 | 0.051156 | 0.0247   | 1  | DEF6         | differentially expressed in FDCP 6 homolog (mouse)                       | Upregulated   |
| A_23_P211 | 0.002309 | 0.000381 | -1 | UBP1         | upstream binding protein 1 (LBP-1a)                                      | Downregulated |
| A_19_P003 | 0.00249  | 0.000427 | -1 | LOC1004227   | uncharacterized LOC100422737                                             | Downregulated |
| A_33_P332 | 0.002511 | 0.000433 | -1 | CIITA        | class II, major histocompatibility complex, transactivator               | Downregulated |
| A_22_P000 | 0.002572 | 0.00045  | -1 | lnc-TMEM105  | lnc-TMEM105-1:1                                                          | Downregulated |
| A_23_P949 | 0.002798 | 0.000509 | -1 | MMADHC       | methylmalonic aciduria (cobalamin deficiency) cblD type, with homocystir | Downregulated |
| A_23_P310 | 0.003012 | 0.000572 | -1 | NUDT16       | nudix (nucleoside diphosphate linked moiety X)-type motif 16             | Downregulated |
| A_33_P341 | 0.003033 | 0.000578 | -1 | MLH1         | mutL homolog 1                                                           | Downregulated |
| A_33_P331 | 0.003277 | 0.000652 | -1 | FLJ44674     | FLJ44674 protein                                                         | Downregulated |
| A_23_P674 | 0.003794 | 0.000808 | -1 | PSMD8        | proteasome (prosome, macropain) 26S subunit, non-ATPase, 8               | Downregulated |
| A_33_P339 | 0.003806 | 0.000813 | -1 | GUK1         | guanylate kinase 1                                                       | Downregulated |
| A_33_P327 | 0.004147 | 0.000919 | -1 | TXNDC8       | thioredoxin domain containing 8 (spermatozoa)                            | Downregulated |
| A_33_P333 | 0.004928 | 0.00119  | -1 | MECP2        | methyl CpG binding protein 2                                             | Downregulated |
| A_22_P000 | 0.005491 | 0.00139  | -1 | LMO7         | LIM domain 7                                                             | Downregulated |
| A_21_P000 | 0.005537 | 0.00141  | -1 | lnc-PARN-6   | lnc-PARN-6:3                                                             | Downregulated |
| A_24_P287 | 0.005537 | 0.00141  | -1 | PSMC3IP      | PSMC3 interacting protein                                                | Downregulated |
| A_23_P239 | 0.005697 | 0.00147  | -1 | FAM188A      | family with sequence similarity 188, member A                            | Downregulated |
| A_32_P925 | 0.006983 | 0.00196  | -1 | LCLAT1       | lysocardiolipin acyltransferase 1                                        | Downregulated |
| A_23_P736 | 0.007458 | 0.00215  | -1 | NR0B1        | nuclear receptor subfamily 0, group B, member 1                          | Downregulated |
| A_33_P370 | 0.007458 | 0.00215  | -1 | SNORA28      | small nucleolar RNA, H/ACA box 28                                        | Downregulated |
| A_22_P000 | 0.007512 | 0.00217  | -1 | lnc-RIMS3-2  | lnc-RIMS3-2:1                                                            | Downregulated |
| A_24_P801 | 0.008107 | 0.00241  | -1 | PDCL3        | phosducin-like 3                                                         | Downregulated |
| A_23_P133 | 0.008875 | 0.00272  | -1 | PPIL1        | peptidylprolyl isomerase (cyclophilin)-like 1                            | Downregulated |
| A_24_P403 | 0.008915 | 0.00274  | -1 | ZNF385A      | zinc finger protein 385A                                                 | Downregulated |
| A_22_P000 | 0.009491 | 0.00297  | -1 | lnc-DOCK8-1  | lnc-DOCK8-1:1                                                            | Downregulated |
| A_21_P000 | 0.009491 | 0.00297  | -1 | lnc-PIK3CG-2 | lnc-PIK3CG-2:3                                                           | Downregulated |
| A_24_P924 | 0.013026 | 0.0045   | -1 | CFI          | complement factor I                                                      | Downregulated |
| A_23_P115 | 0.014197 | 0.00503  | -1 | IPO13        | importin 13                                                              | Downregulated |
| A_22_P000 | 0.014724 | 0.00529  | -1 | C7orf13      | chromosome 7 open reading frame 13                                       | Downregulated |
| A_23_P367 | 0.016265 | 0.00601  | -1 | C2CD5        | C2 calcium-dependent domain containing 5                                 | Downregulated |



|           |          |          |       |                |                                                                         |               |
|-----------|----------|----------|-------|----------------|-------------------------------------------------------------------------|---------------|
| A_23_P286 | 0.017092 | 0.00641  | -1    | CPSF3          | cleavage and polyadenylation specific factor 3, 73kDa                   | Downregulated |
| A_33_P322 | 0.017554 | 0.00662  | -1    | ZNF117         | zinc finger protein 117                                                 | Downregulated |
| A_33_P328 | 0.022678 | 0.00908  | -1    | CCDC136        | coiled-coil domain containing 136                                       | Downregulated |
| A_24_P124 | 0.0342   | 0.0151   | -1    | NCOA7          | nuclear receptor coactivator 7                                          | Downregulated |
| A_22_P000 | 0.03469  | 0.0154   | -1    | lnc-ATP6AP2    | lnc-ATP6AP2-3:1                                                         | Downregulated |
| A_33_P337 | 0.03469  | 0.0154   | -1    | RGS7BP         | regulator of G-protein signaling 7 binding protein                      | Downregulated |
| A_21_P000 | 0.04017  | 0.0184   | -1    | lnc-DLGAP2     | lnc-DLGAP2-4:1                                                          | Downregulated |
| A_21_P001 | 0.043763 | 0.0204   | -1    | XLOC_I2_000423 |                                                                         | Downregulated |
| A_23_P360 | 0.046842 | 0.0222   | -1    | LRWD1          | leucine-rich repeats and WD repeat domain containing 1                  | Downregulated |
| A_33_P647 | 0.059444 | 0.0295   | -1    | SHANK2-AS1     | SHANK2 antisense RNA 1                                                  | Downregulated |
| A_32_P194 | 0.075725 | 0.0394   | -1    | SDK2           | sidekick cell adhesion molecule 2                                       | Downregulated |
| A_21_P000 | 0.078838 | 0.0414   | -1    | lnc-KIDINS22   | lnc-KIDINS220-6:7                                                       | Downregulated |
| A_23_P112 | 0.082675 | 0.0438   | -1    | CST1           | cystatin SN                                                             | Downregulated |
| A_23_P325 | 0.002339 | 0.000388 | -1.01 | XPO6           | exportin 6                                                              | Downregulated |
| A_33_P337 | 0.00237  | 0.000396 | -1.01 | TRAFD1         | TRAF-type zinc finger domain containing 1                               | Downregulated |
| A_22_P000 | 0.002521 | 0.000435 | -1.01 | lnc-C1orf124   | lnc-C1orf124-2:1                                                        | Downregulated |
| A_23_P456 | 0.00255  | 0.000443 | -1.01 | FUBP1          | far upstream element (FUSE) binding protein 1                           | Downregulated |
| A_23_P629 | 0.002707 | 0.000485 | -1.01 | BTG2           | BTG family, member 2                                                    | Downregulated |
| A_23_P377 | 0.002859 | 0.000527 | -1.01 | SRSF5          | serine/arginine-rich splicing factor 5                                  | Downregulated |
| A_23_P167 | 0.003012 | 0.000572 | -1.01 | IGJ            | immunoglobulin J polypeptide, linker protein for immunoglobulin alpha a | Downregulated |
| A_23_P622 | 0.003068 | 0.000588 | -1.01 | KDM5C          | lysine (K)-specific demethylase 5C                                      | Downregulated |
| A_24_P139 | 0.003096 | 0.000597 | -1.01 | ITCH           | itchy E3 ubiquitin protein ligase                                       | Downregulated |
| A_32_P994 | 0.003208 | 0.000632 | -1.01 | TRAPPC5        | trafficking protein particle complex 5                                  | Downregulated |
| A_22_P000 | 0.003262 | 0.000647 | -1.01 | lnc-ASH2L-1    | lnc-ASH2L-1:1                                                           | Downregulated |
| A_22_P000 | 0.003338 | 0.000671 | -1.01 | lnc-TIMM9-2    | lnc-TIMM9-2:12                                                          | Downregulated |
| A_23_P105 | 0.003878 | 0.000836 | -1.01 | EIF2B1         | eukaryotic translation initiation factor 2B, subunit 1 alpha, 26kDa     | Downregulated |
| A_33_P336 | 0.004079 | 0.000896 | -1.01 | FLNA           | filamin A, alpha                                                        | Downregulated |
| A_23_P404 | 0.004987 | 0.00121  | -1.01 | PCTP           | phosphatidylcholine transfer protein                                    | Downregulated |
| A_33_P327 | 0.006955 | 0.00195  | -1.01 | FILIP1         | filamin A interacting protein 1                                         | Downregulated |
| A_33_P333 | 0.006955 | 0.00195  | -1.01 | LINC00113      | long intergenic non-protein coding RNA 113                              | Downregulated |
| A_33_P331 | 0.007183 | 0.00204  | -1.01 | OR51B6         | olfactory receptor, family 51, subfamily B, member 6                    | Downregulated |
| A_33_P335 | 0.00914  | 0.00283  | -1.01 | KCMF1          | potassium channel modulatory factor 1                                   | Downregulated |
| A_33_P325 | 0.012505 | 0.00427  | -1.01 | FCHO1          | FCH domain only 1                                                       | Downregulated |
| A_19_P003 | 0.048739 | 0.0233   | -1.01 | lnc-ERP44-3    | lnc-ERP44-3:3                                                           | Downregulated |
| A_32_P155 | 0.048739 | 0.0233   | -1.01 | PRIMA1         | proline rich membrane anchor 1                                          | Downregulated |
| A_33_P381 | 0.057747 | 0.0285   | -1.01 | LOC344967      | acyl-CoA thioesterase 7 pseudogene                                      | Downregulated |
| A_23_P125 | 0.068341 | 0.0348   | -1.01 | GABRQ          | gamma-aminobutyric acid (GABA) A receptor, theta                        | Downregulated |

|           |          |          |       |                |                                                                             |               |
|-----------|----------|----------|-------|----------------|-----------------------------------------------------------------------------|---------------|
| A_21_P000 | 0.069528 | 0.0356   | -1.01 | ZSCAN12        | zinc finger and SCAN domain containing 12                                   | Downregulated |
| A_24_P142 | 0.002248 | 0.000368 | -1.02 | CHMP4A         | charged multivesicular body protein 4A                                      | Downregulated |
| A_23_P978 | 0.002277 | 0.000374 | -1.02 | LIPA           | lipase A, lysosomal acid, cholesterol esterase                              | Downregulated |
| A_23_P980 | 0.00228  | 0.000375 | -1.02 | PTEN           | phosphatase and tensin homolog                                              | Downregulated |
| A_24_P239 | 0.002505 | 0.000431 | -1.02 | RNF187         | ring finger protein 187                                                     | Downregulated |
| A_23_P211 | 0.002562 | 0.000446 | -1.02 | DYRK1A         | dual-specificity tyrosine-(Y)-phosphorylation regulated kinase 1A           | Downregulated |
| A_23_P165 | 0.002775 | 0.000504 | -1.02 | BIN1           | bridging integrator 1                                                       | Downregulated |
| A_23_P429 | 0.003132 | 0.000608 | -1.02 | GNPNAT1        | glucosamine-phosphate N-acetyltransferase 1                                 | Downregulated |
| A_23_P119 | 0.003173 | 0.000621 | -1.02 | RETN           | resistin                                                                    | Downregulated |
| A_22_P000 | 0.003663 | 0.000768 | -1.02 | lnc-DGKE-2     | lnc-DGKE-2:1                                                                | Downregulated |
| A_21_P000 | 0.003826 | 0.000819 | -1.02 | AHSA2          | AHA1, activator of heat shock 90kDa protein ATPase homolog 2 (yeast)        | Downregulated |
| A_33_P333 | 0.003847 | 0.000826 | -1.02 | ZNF428         | zinc finger protein 428                                                     | Downregulated |
| A_23_P972 | 0.004739 | 0.00112  | -1.02 | GON4L          | gon-4-like (C. elegans)                                                     | Downregulated |
| A_24_P335 | 0.005623 | 0.00144  | -1.02 | SLC7A5         | solute carrier family 7 (amino acid transporter light chain, L system), men | Downregulated |
| A_32_P191 | 0.006724 | 0.00186  | -1.02 | ATAD2B         | ATPase family, AAA domain containing 2B                                     | Downregulated |
| A_23_P139 | 0.010841 | 0.00354  | -1.02 | C11orf73       | chromosome 11 open reading frame 73                                         | Downregulated |
| A_23_P122 | 0.013064 | 0.00451  | -1.02 | DDX41          | DEAD (Asp-Glu-Ala-Asp) box polypeptide 41                                   | Downregulated |
| A_23_P350 | 0.013248 | 0.00459  | -1.02 | ZC3H18         | zinc finger CCCH-type containing 18                                         | Downregulated |
| A_33_P336 | 0.013308 | 0.00462  | -1.02 | NPPB           | natriuretic peptide B                                                       | Downregulated |
| A_24_P898 | 0.016311 | 0.00604  | -1.02 | ZNF189         | zinc finger protein 189                                                     | Downregulated |
| A_19_P008 | 0.021061 | 0.00828  | -1.02 | lnc-RLIM-3     | lnc-RLIM-3:1                                                                | Downregulated |
| A_33_P331 | 0.021835 | 0.00866  | -1.02 | TOR1AIP1       | torsin A interacting protein 1                                              | Downregulated |
| A_33_P348 | 0.031087 | 0.0135   | -1.02 | SPI1           | Spi-1 proto-oncogene                                                        | Downregulated |
| A_23_P153 | 0.034667 | 0.0154   | -1.02 | YIF1B          | Yip1 interacting factor homolog B (S. cerevisiae)                           | Downregulated |
| A_21_P001 | 0.035247 | 0.0157   | -1.02 | XLOC_I2_006745 |                                                                             | Downregulated |
| A_23_P118 | 0.053877 | 0.0263   | -1.02 | TVP23B         | trans-golgi network vesicle protein 23 homolog B (S. cerevisiae)            | Downregulated |
| A_23_P346 | 0.06886  | 0.0352   | -1.02 | AVPR2          | arginine vasopressin receptor 2                                             | Downregulated |
| A_22_P000 | 0.070111 | 0.0359   | -1.02 | CASC18         | cancer susceptibility candidate 18 (non-protein coding)                     | Downregulated |
| A_19_P003 | 0.07829  | 0.041    | -1.02 | LOC1019270     | uncharacterized LOC101927043                                                | Downregulated |
| A_24_P305 | 0.002219 | 0.000358 | -1.03 | PITPNB         | phosphatidylinositol transfer protein, beta                                 | Downregulated |
| A_33_P331 | 0.002221 | 0.000359 | -1.03 | PEL1           | pellino E3 ubiquitin protein ligase 1                                       | Downregulated |
| A_33_P331 | 0.002249 | 0.000368 | -1.03 | PDPR           | pyruvate dehydrogenase phosphatase regulatory subunit                       | Downregulated |
| A_21_P000 | 0.002365 | 0.000395 | -1.03 | SCARNA18       | small Cajal body-specific RNA 18                                            | Downregulated |
| A_24_P398 | 0.002381 | 0.000399 | -1.03 | USP6NL         | USP6 N-terminal like                                                        | Downregulated |
| A_22_P000 | 0.002423 | 0.000409 | -1.03 | CERS6-AS1      | CERS6 antisense RNA 1                                                       | Downregulated |
| A_33_P330 | 0.002533 | 0.000439 | -1.03 | KLHL36         | kelch-like family member 36                                                 | Downregulated |
| A_33_P333 | 0.002558 | 0.000445 | -1.03 | FBXL20         | F-box and leucine-rich repeat protein 20                                    | Downregulated |

|           |          |          |       |             |                                                                      |               |
|-----------|----------|----------|-------|-------------|----------------------------------------------------------------------|---------------|
| A_24_P271 | 0.002559 | 0.000445 | -1.03 | SLC2A10     | solute carrier family 2 (facilitated glucose transporter), member 10 | Downregulated |
| A_33_P331 | 0.002874 | 0.000532 | -1.03 | TMEM154     | transmembrane protein 154                                            | Downregulated |
| A_23_P255 | 0.0029   | 0.000539 | -1.03 | PLGRKT      | plasminogen receptor, C-terminal lysine transmembrane protein        | Downregulated |
| A_22_P000 | 0.002967 | 0.000558 | -1.03 | LOC1005061  | uncharacterized LOC100506100                                         | Downregulated |
| A_24_P172 | 0.002968 | 0.000559 | -1.03 | AARS        | alanyl-tRNA synthetase                                               | Downregulated |
| A_22_P000 | 0.002995 | 0.000567 | -1.03 | lnc-MLH3-1  | lnc-MLH3-1:1                                                         | Downregulated |
| A_23_P549 | 0.003096 | 0.000597 | -1.03 | MRPL38      | mitochondrial ribosomal protein L38                                  | Downregulated |
| A_21_P000 | 0.003109 | 0.000601 | -1.03 | SNORD25     | small nucleolar RNA, C/D box 25                                      | Downregulated |
| A_23_P161 | 0.003795 | 0.000809 | -1.03 | PDSS1       | prenyl (decaprenyl) diphosphate synthase, subunit 1                  | Downregulated |
| A_24_P352 | 0.003822 | 0.000818 | -1.03 | MRPL42      | mitochondrial ribosomal protein L42                                  | Downregulated |
| A_23_P171 | 0.004113 | 0.000908 | -1.03 | EBP         | emopamil binding protein (sterol isomerase)                          | Downregulated |
| A_23_P786 | 0.004499 | 0.00104  | -1.03 | FARSA       | phenylalanyl-tRNA synthetase, alpha subunit                          | Downregulated |
| A_23_P215 | 0.004859 | 0.00117  | -1.03 | CDK13       | cyclin-dependent kinase 13                                           | Downregulated |
| A_23_P534 | 0.004979 | 0.0012   | -1.03 | IKBIP       | IKBKB interacting protein                                            | Downregulated |
| A_33_P321 | 0.00511  | 0.00125  | -1.03 | SIKE1       | suppressor of IKBKE 1                                                | Downregulated |
| A_33_P322 | 0.005864 | 0.00153  | -1.03 | ADAMTS10    | ADAM metalloproteinase with thrombospondin type 1 motif, 10          | Downregulated |
| A_23_P604 | 0.007149 | 0.00203  | -1.03 | PPP2R4      | protein phosphatase 2A activator, regulatory subunit 4               | Downregulated |
| A_32_P101 | 0.007716 | 0.00225  | -1.03 | TMEM106A    | transmembrane protein 106A                                           | Downregulated |
| A_33_P332 | 0.012991 | 0.00448  | -1.03 | MED25       | mediator complex subunit 25                                          | Downregulated |
| A_33_P322 | 0.019344 | 0.00746  | -1.03 | GOLGA6L6    | golgin A6 family-like 6                                              | Downregulated |
| A_21_P000 | 0.02316  | 0.00932  | -1.03 | lnc-GLRX5-1 | lnc-GLRX5-1:5                                                        | Downregulated |
| A_23_P111 | 0.02316  | 0.00932  | -1.03 | PPIL6       | peptidylprolyl isomerase (cyclophilin)-like 6                        | Downregulated |
| A_23_P123 | 0.031596 | 0.0137   | -1.03 | PSMG3-AS1   | PSMG3 antisense RNA 1 (head to head)                                 | Downregulated |
| A_21_P001 | 0.031596 | 0.0137   | -1.03 | ZNF726      | zinc finger protein 726                                              | Downregulated |
| A_23_P184 | 0.047422 | 0.0225   | -1.03 | MAEA        | macrophage erythroblast attacher                                     | Downregulated |
| A_33_P335 | 0.05406  | 0.0264   | -1.03 | HMG2        | high mobility group AT-hook 2                                        | Downregulated |
| A_21_P000 | 0.075293 | 0.0391   | -1.03 | FLJ20021    | uncharacterized LOC90024                                             | Downregulated |
| A_33_P332 | 0.091663 | 0.0499   | -1.03 | TTN         | titin                                                                | Downregulated |
| A_23_P134 | 0.002369 | 0.000396 | -1.04 | CSGALNACT   | chondroitin sulfate N-acetylgalactosaminyltransferase 1              | Downregulated |
| A_23_P350 | 0.002394 | 0.000402 | -1.04 | GLTSCR1L    | GLTSCR1-like                                                         | Downregulated |
| A_33_P337 | 0.002472 | 0.000421 | -1.04 | RBM14-RBM4  | RBM14-RBM4 readthrough                                               | Downregulated |
| A_24_P119 | 0.00268  | 0.000477 | -1.04 | PHACTR4     | phosphatase and actin regulator 4                                    | Downregulated |
| A_33_P344 | 0.002912 | 0.000542 | -1.04 | OXR1        | oxidation resistance 1                                               | Downregulated |
| A_24_P247 | 0.003279 | 0.000653 | -1.04 | AK3         | adenylate kinase 3                                                   | Downregulated |
| A_22_P000 | 0.003408 | 0.000691 | -1.04 | lnc-NT5E-1  | lnc-NT5E-1:1                                                         | Downregulated |
| A_24_P885 | 0.003504 | 0.000718 | -1.04 | PEX11B      | peroxisomal biogenesis factor 11 beta                                | Downregulated |
| A_33_P329 | 0.003719 | 0.000786 | -1.04 | WEE1        | WEE1 G2 checkpoint kinase                                            | Downregulated |

|           |          |          |       |                |                                                                       |               |
|-----------|----------|----------|-------|----------------|-----------------------------------------------------------------------|---------------|
| A_23_P343 | 0.003983 | 0.000868 | -1.04 | ANGEL2         | angel homolog 2 (Drosophila)                                          | Downregulated |
| A_21_P001 | 0.004088 | 0.000899 | -1.04 | GK3P           | glycerol kinase 3 pseudogene                                          | Downregulated |
| A_23_P282 | 0.004106 | 0.000906 | -1.04 | CTDSP1         | CTD (carboxy-terminal domain, RNA polymerase II, polypeptide A) small | Downregulated |
| A_22_P000 | 0.004114 | 0.000909 | -1.04 | lnc-PITPNC1-   | lnc-PITPNC1-1:1                                                       | Downregulated |
| A_24_P250 | 0.004669 | 0.0011   | -1.04 | SNRPA          | small nuclear ribonucleoprotein polypeptide A                         | Downregulated |
| A_33_P330 | 0.005091 | 0.00124  | -1.04 | LRRC39         | leucine rich repeat containing 39                                     | Downregulated |
| A_23_P490 | 0.005154 | 0.00127  | -1.04 | TMEM62         | transmembrane protein 62                                              | Downregulated |
| A_23_P881 | 0.005735 | 0.00148  | -1.04 | CINP           | cyclin-dependent kinase 2 interacting protein                         | Downregulated |
| A_22_P000 | 0.005796 | 0.00151  | -1.04 | LOC1019279     | uncharacterized LOC101927963                                          | Downregulated |
| A_23_P117 | 0.005917 | 0.00155  | -1.04 | MTFMT          | mitochondrial methionyl-tRNA formyltransferase                        | Downregulated |
| A_23_P487 | 0.006603 | 0.00182  | -1.04 | C14orf159      | chromosome 14 open reading frame 159                                  | Downregulated |
| A_33_P327 | 0.006715 | 0.00186  | -1.04 | TXNDC5         | thioredoxin domain containing 5 (endoplasmic reticulum)               | Downregulated |
| A_24_P390 | 0.006906 | 0.00193  | -1.04 | TRAPPC6A       | trafficking protein particle complex 6A                               | Downregulated |
| A_21_P000 | 0.011269 | 0.00373  | -1.04 | LOC1027247     | uncharacterized LOC102724758                                          | Downregulated |
| A_22_P000 | 0.011812 | 0.00397  | -1.04 | lnc-C6orf221-  | lnc-C6orf221-2:3                                                      | Downregulated |
| A_24_P194 | 0.014614 | 0.00523  | -1.04 | EHBP1          | EH domain binding protein 1                                           | Downregulated |
| A_21_P000 | 0.01848  | 0.00705  | -1.04 | lnc-BANP-1     | lnc-BANP-1:4                                                          | Downregulated |
| A_22_P000 | 0.022463 | 0.00897  | -1.04 | LOC284009      | uncharacterized LOC284009                                             | Downregulated |
| A_33_P383 | 0.023436 | 0.00946  | -1.04 | HAUS2          | HAUS augmin-like complex, subunit 2                                   | Downregulated |
| A_32_P321 | 0.030488 | 0.0132   | -1.04 | WDFY4          | WDFY family member 4                                                  | Downregulated |
| A_33_P335 | 0.031609 | 0.0138   | -1.04 | NHSL2          | NHS-like 2                                                            | Downregulated |
| A_22_P000 | 0.036406 | 0.0164   | -1.04 | LOC1005068     | uncharacterized LOC100506801                                          | Downregulated |
| A_21_P001 | 0.046867 | 0.0222   | -1.04 | XLOC_I2_002033 |                                                                       | Downregulated |
| A_21_P000 | 0.057717 | 0.0285   | -1.04 | LINC00908      | long intergenic non-protein coding RNA 908                            | Downregulated |
| A_23_P541 | 0.060451 | 0.0301   | -1.04 | NIF3L1         | NIF3 NGG1 interacting factor 3-like 1 (S. cerevisiae)                 | Downregulated |
| A_22_P000 | 0.060593 | 0.0302   | -1.04 | lnc-SETD1B-1   | lnc-SETD1B-1:1                                                        | Downregulated |
| A_22_P000 | 0.066548 | 0.0338   | -1.04 | lnc-OCIAD2-1   | lnc-OCIAD2-1:1                                                        | Downregulated |
| A_21_P000 | 0.072528 | 0.0374   | -1.04 | LOC645434      | uncharacterized LOC645434                                             | Downregulated |
| A_33_P341 | 0.002131 | 0.000337 | -1.05 | NUDT8          | nudix (nucleoside diphosphate linked moiety X)-type motif 8           | Downregulated |
| A_33_P339 | 0.002227 | 0.000361 | -1.05 | TNFSF9         | tumor necrosis factor (ligand) superfamily, member 9                  | Downregulated |
| A_24_P673 | 0.002321 | 0.000383 | -1.05 | PIP4K2A        | phosphatidylinositol-5-phosphate 4-kinase, type II, alpha             | Downregulated |
| A_23_P201 | 0.002433 | 0.000411 | -1.05 | GUK1           | guanylate kinase 1                                                    | Downregulated |
| A_24_P453 | 0.00255  | 0.000443 | -1.05 | NIPAL3         | NIPA-like domain containing 3                                         | Downregulated |
| A_23_P368 | 0.002563 | 0.000446 | -1.05 | AGPS           | alkylglycerone phosphate synthase                                     | Downregulated |
| A_23_P259 | 0.002712 | 0.000487 | -1.05 | EIF2B2         | eukaryotic translation initiation factor 2B, subunit 2 beta, 39kDa    | Downregulated |
| A_23_P117 | 0.003094 | 0.000596 | -1.05 | UBL7           | ubiquitin-like 7                                                      | Downregulated |
| A_23_P133 | 0.003855 | 0.000829 | -1.05 | LSP1           | lymphocyte-specific protein 1                                         | Downregulated |

|           |          |          |       |                |                                                         |               |
|-----------|----------|----------|-------|----------------|---------------------------------------------------------|---------------|
| A_33_P325 | 0.004778 | 0.00114  | -1.05 | SPTBN1         | spectrin, beta, non-erythrocytic 1                      | Downregulated |
| A_21_P000 | 0.006003 | 0.00158  | -1.05 | SNORA71D       | small nucleolar RNA, H/ACA box 71D                      | Downregulated |
| A_23_P136 | 0.006349 | 0.00172  | -1.05 | MAGEA6         | melanoma antigen family A, 6                            | Downregulated |
| A_33_P322 | 0.006477 | 0.00177  | -1.05 | C16orf54       | chromosome 16 open reading frame 54                     | Downregulated |
| A_24_P131 | 0.007614 | 0.00221  | -1.05 | ATP13A2        | ATPase type 13A2                                        | Downregulated |
| A_23_P422 | 0.008365 | 0.00252  | -1.05 | WDR63          | WD repeat domain 63                                     | Downregulated |
| A_22_P000 | 0.010093 | 0.00323  | -1.05 | IFNG-AS1       | IFNG antisense RNA 1                                    | Downregulated |
| A_23_P152 | 0.012697 | 0.00435  | -1.05 | B9D1           | B9 protein domain 1                                     | Downregulated |
| A_24_P410 | 0.012697 | 0.00435  | -1.05 | ROR1           | receptor tyrosine kinase-like orphan receptor 1         | Downregulated |
| A_21_P000 | 0.016548 | 0.00615  | -1.05 | lnc-ZNF680-1   | lnc-ZNF680-1:1                                          | Downregulated |
| A_23_P503 | 0.049204 | 0.0235   | -1.05 | NAT14          | N-acetyltransferase 14 (GCN5-related, putative)         | Downregulated |
| A_21_P001 | 0.055566 | 0.0272   | -1.05 | XLOC_I2_000138 |                                                         | Downregulated |
| A_22_P000 | 0.071529 | 0.0368   | -1.05 | LINC00670      | long intergenic non-protein coding RNA 670              | Downregulated |
| A_24_P386 | 0.002087 | 0.000324 | -1.06 | PPP1CC         | protein phosphatase 1, catalytic subunit, gamma isozyme | Downregulated |
| A_23_P145 | 0.002124 | 0.000334 | -1.06 | S100A11        | S100 calcium binding protein A11                        | Downregulated |
| A_21_P001 | 0.002124 | 0.000335 | -1.06 | LINC01347      | long intergenic non-protein coding RNA 1347             | Downregulated |
| A_23_P256 | 0.002241 | 0.000365 | -1.06 | RPA3           | replication protein A3, 14kDa                           | Downregulated |
| A_32_P209 | 0.002423 | 0.000409 | -1.06 | MRPL46         | mitochondrial ribosomal protein L46                     | Downregulated |
| A_21_P000 | 0.002427 | 0.00041  | -1.06 | lnc-DENND1A    | lnc-DENND1A-1:1                                         | Downregulated |
| A_33_P324 | 0.002454 | 0.000416 | -1.06 | VWA9           | von Willebrand factor A domain containing 9             | Downregulated |
| A_22_P000 | 0.002516 | 0.000434 | -1.06 | lnc-PDHX-1     | lnc-PDHX-1:1                                            | Downregulated |
| A_23_P806 | 0.002611 | 0.00046  | -1.06 | SETMAR         | SET domain and mariner transposase fusion gene          | Downregulated |
| A_21_P000 | 0.002669 | 0.000474 | -1.06 | lnc-CHL1-1     | lnc-CHL1-1:1                                            | Downregulated |
| A_23_P602 | 0.002719 | 0.000488 | -1.06 | GRHPR          | glyoxylate reductase/hydroxypyruvate reductase          | Downregulated |
| A_33_P323 | 0.002873 | 0.000531 | -1.06 | MIA3           | melanoma inhibitory activity family, member 3           | Downregulated |
| A_32_P155 | 0.003033 | 0.000578 | -1.06 | CD2AP          | CD2-associated protein                                  | Downregulated |
| A_23_P113 | 0.003094 | 0.000596 | -1.06 | C10orf11       | chromosome 10 open reading frame 11                     | Downregulated |
| A_33_P323 | 0.003159 | 0.000617 | -1.06 | PYHIN1         | pyrin and HIN domain family, member 1                   | Downregulated |
| A_21_P000 | 0.003283 | 0.000654 | -1.06 | lnc-SETD6-8    | lnc-SETD6-8:1                                           | Downregulated |
| A_33_P341 | 0.003529 | 0.000726 | -1.06 | MAP3K2         | mitogen-activated protein kinase kinase kinase 2        | Downregulated |
| A_23_P376 | 0.003535 | 0.000728 | -1.06 | PAPOLA         | poly(A) polymerase alpha                                | Downregulated |
| A_33_P328 | 0.003893 | 0.000841 | -1.06 | DNM1L          | dynamitin 1-like                                        | Downregulated |
| A_33_P332 | 0.004674 | 0.0011   | -1.06 | POLL           | polymerase (DNA directed), lambda                       | Downregulated |
| A_22_P000 | 0.004658 | 0.0011   | -1.06 | TMEM231        | transmembrane protein 231                               | Downregulated |
| A_33_P337 | 0.00501  | 0.00122  | -1.06 | SCIMP          | SLP adaptor and CSK interacting membrane protein        | Downregulated |
| A_33_P322 | 0.005296 | 0.00132  | -1.06 | LINC00656      | long intergenic non-protein coding RNA 656              | Downregulated |
| A_24_P225 | 0.007006 | 0.00197  | -1.06 | IRS1           | insulin receptor substrate 1                            | Downregulated |

|           |          |          |       |                |                                                                    |               |
|-----------|----------|----------|-------|----------------|--------------------------------------------------------------------|---------------|
| A_33_P333 | 0.007949 | 0.00234  | -1.06 | ZXDB           | zinc finger, X-linked, duplicated B                                | Downregulated |
| A_23_P140 | 0.009322 | 0.00291  | -1.06 | LMAN1L         | lectin, mannose-binding, 1 like                                    | Downregulated |
| A_33_P324 | 0.009413 | 0.00294  | -1.06 | RAD52          | RAD52 homolog ( <i>S. cerevisiae</i> )                             | Downregulated |
| A_23_P382 | 0.010757 | 0.00351  | -1.06 | BCKDK          | branched chain ketoacid dehydrogenase kinase                       | Downregulated |
| A_33_P337 | 0.014378 | 0.00512  | -1.06 | SNAPC2         | small nuclear RNA activating complex, polypeptide 2, 45kDa         | Downregulated |
| A_22_P000 | 0.014597 | 0.00523  | -1.06 | CASC11         | cancer susceptibility candidate 11 (non-protein coding)            | Downregulated |
| A_33_P329 | 0.014597 | 0.00523  | -1.06 | FAM127C        | family with sequence similarity 127, member C                      | Downregulated |
| A_22_P000 | 0.014597 | 0.00523  | -1.06 | lnc-AKAP10-1   | lnc-AKAP10-1:1                                                     | Downregulated |
| A_21_P000 | 0.016221 | 0.00599  | -1.06 | lnc-ZNF608-5   | lnc-ZNF608-5:1                                                     | Downregulated |
| A_23_P144 | 0.017139 | 0.00643  | -1.06 | RAD1           | RAD1 checkpoint DNA exonuclease                                    | Downregulated |
| A_23_P832 | 0.021971 | 0.00873  | -1.06 | AK8            | adenylate kinase 8                                                 | Downregulated |
| A_22_P000 | 0.021998 | 0.00874  | -1.06 | lnc-GCM1-1     | lnc-GCM1-1:1                                                       | Downregulated |
| A_21_P000 | 0.022121 | 0.0088   | -1.06 | LINC01586      | long intergenic non-protein coding RNA 1586                        | Downregulated |
| A_33_P336 | 0.024852 | 0.0102   | -1.06 | SYT8           | synaptotagmin VIII                                                 | Downregulated |
| A_21_P001 | 0.038507 | 0.0175   | -1.06 | lnc-FGF10-3    | lnc-FGF10-3:3                                                      | Downregulated |
| A_23_P372 | 0.039011 | 0.0178   | -1.06 | CGRRF1         | cell growth regulator with ring finger domain 1                    | Downregulated |
| A_23_P365 | 0.041105 | 0.019    | -1.06 | KCNG4          | potassium channel, voltage gated modifier subfamily G, member 4    | Downregulated |
| A_23_P903 | 0.002119 | 0.000333 | -1.07 | TMEM259        | transmembrane protein 259                                          | Downregulated |
| A_24_P583 | 0.002128 | 0.000337 | -1.07 | DCAKD          | dephospho-CoA kinase domain containing                             | Downregulated |
| A_23_P243 | 0.002197 | 0.000353 | -1.07 | CCDC88B        | coiled-coil domain containing 88B                                  | Downregulated |
| A_24_P134 | 0.002219 | 0.000358 | -1.07 | MYADM          | myeloid-associated differentiation marker                          | Downregulated |
| A_23_P309 | 0.002339 | 0.000388 | -1.07 | CYB5R4         | cytochrome b5 reductase 4                                          | Downregulated |
| A_21_P001 | 0.002995 | 0.000567 | -1.07 | XLOC_I2_015565 |                                                                    | Downregulated |
| A_21_P001 | 0.003155 | 0.000615 | -1.07 | LOC1019286     | uncharacterized LOC101928670                                       | Downregulated |
| A_24_P153 | 0.003259 | 0.000647 | -1.07 | FGD3           | FYVE, RhoGEF and PH domain containing 3                            | Downregulated |
| A_33_P329 | 0.003381 | 0.000682 | -1.07 | TET1           | tet methylcytosine dioxygenase 1                                   | Downregulated |
| A_23_P422 | 0.003648 | 0.000763 | -1.07 | CUL4B          | cullin 4B                                                          | Downregulated |
| A_21_P001 | 0.003957 | 0.00086  | -1.07 | XLOC_I2_005874 |                                                                    | Downregulated |
| A_23_P914 | 0.004131 | 0.000914 | -1.07 | RWDD2B         | RWD domain containing 2B                                           | Downregulated |
| A_24_P678 | 0.00431  | 0.000976 | -1.07 | MGEA5          | meningioma expressed antigen 5 (hyaluronidase)                     | Downregulated |
| A_32_P148 | 0.004708 | 0.00111  | -1.07 | ANXA2          | annexin A2                                                         | Downregulated |
| A_23_P314 | 0.004901 | 0.00118  | -1.07 | CHKB           | choline kinase beta                                                | Downregulated |
| A_23_P703 | 0.005095 | 0.00125  | -1.07 | ENPP4          | ectonucleotide pyrophosphatase/phosphodiesterase 4 (putative)      | Downregulated |
| A_33_P325 | 0.005114 | 0.00125  | -1.07 | TAB3           | TGF-beta activated kinase 1/MAP3K7 binding protein 3               | Downregulated |
| A_23_P170 | 0.005516 | 0.0014   | -1.07 | PACRG          | PARK2 co-regulated                                                 | Downregulated |
| A_32_P226 | 0.005508 | 0.0014   | -1.07 | YWHAZ          | tyrosine 3-monooxygenase/tryptophan 5-monooxygenase activation prc | Downregulated |
| A_21_P000 | 0.006094 | 0.00162  | -1.07 | DNAJC3-AS1     | DNAJC3 antisense RNA 1 (head to head)                              | Downregulated |

|           |          |          |       |              |                                                                            |               |
|-----------|----------|----------|-------|--------------|----------------------------------------------------------------------------|---------------|
| A_33_P338 | 0.006203 | 0.00166  | -1.07 | NUDT8        | nudix (nucleoside diphosphate linked moiety X)-type motif 8                | Downregulated |
| A_24_P345 | 0.006262 | 0.00168  | -1.07 | ANTXR2       | anthrax toxin receptor 2                                                   | Downregulated |
| A_22_P000 | 0.007028 | 0.00198  | -1.07 | lnc-ADCK3-1  | lnc-ADCK3-1:1                                                              | Downregulated |
| A_24_P608 | 0.007136 | 0.00203  | -1.07 | CHCHD10      | coiled-coil-helix-coiled-coil-helix domain containing 10                   | Downregulated |
| A_21_P000 | 0.008574 | 0.0026   | -1.07 | lnc-C1QTNF1  | lnc-C1QTNF1-1:1                                                            | Downregulated |
| A_23_P221 | 0.009285 | 0.00289  | -1.07 | PLEC         | plectin                                                                    | Downregulated |
| A_22_P000 | 0.012583 | 0.0043   | -1.07 | lnc-TEAD4-2  | lnc-TEAD4-2:1                                                              | Downregulated |
| A_33_P328 | 0.016168 | 0.00596  | -1.07 | AAK1         | AP2 associated kinase 1                                                    | Downregulated |
| A_23_P103 | 0.017467 | 0.00658  | -1.07 | OCLM         | oculomedin                                                                 | Downregulated |
| A_23_P371 | 0.053461 | 0.026    | -1.07 | PRKACB       | protein kinase, cAMP-dependent, catalytic, beta                            | Downregulated |
| A_33_P329 | 0.057647 | 0.0285   | -1.07 | RAC3         | ras-related C3 botulinum toxin substrate 3 (rho family, small GTP binding) | Downregulated |
| A_22_P000 | 0.075234 | 0.0391   | -1.07 | lnc-PRL-2    | lnc-PRL-2:1                                                                | Downregulated |
| A_24_P413 | 0.001974 | 0.000294 | -1.08 | TGOLN2       | trans-golgi network protein 2                                              | Downregulated |
| A_23_P143 | 0.002016 | 0.000305 | -1.08 | TIPARP       | TCDD-inducible poly(ADP-ribose) polymerase                                 | Downregulated |
| A_23_P156 | 0.002053 | 0.000315 | -1.08 | GOLPH3       | golgi phosphoprotein 3 (coat-protein)                                      | Downregulated |
| A_24_P934 | 0.002072 | 0.00032  | -1.08 | SYNGAP1      | synaptic Ras GTPase activating protein 1                                   | Downregulated |
| A_33_P335 | 0.002077 | 0.000321 | -1.08 | RIC1         | RAB6A GEF complex partner 1                                                | Downregulated |
| A_23_P164 | 0.0021   | 0.000326 | -1.08 | RFFL         | ring finger and FYVE-like domain containing E3 ubiquitin protein ligase    | Downregulated |
| A_22_P000 | 0.002114 | 0.000331 | -1.08 | lnc-GTPBP1-1 | lnc-GTPBP1-1:1                                                             | Downregulated |
| A_23_P535 | 0.002128 | 0.000337 | -1.08 | CCDC53       | coiled-coil domain containing 53                                           | Downregulated |
| A_33_P335 | 0.002167 | 0.000346 | -1.08 | LRRFIP1      | leucine rich repeat (in FLII) interacting protein 1                        | Downregulated |
| A_24_P801 | 0.002229 | 0.000361 | -1.08 | PTPN18       | protein tyrosine phosphatase, non-receptor type 18 (brain-derived)         | Downregulated |
| A_33_P341 | 0.002471 | 0.000421 | -1.08 | VEZT         | vezatin, adherens junctions transmembrane protein                          | Downregulated |
| A_22_P000 | 0.002673 | 0.000475 | -1.08 | LOC1019274   | uncharacterized LOC101927450                                               | Downregulated |
| A_33_P339 | 0.003195 | 0.000628 | -1.08 | SYS1         | Sys1 golgi trafficking protein                                             | Downregulated |
| A_23_P688 | 0.003312 | 0.000663 | -1.08 | TXN2         | thioredoxin 2                                                              | Downregulated |
| A_23_P137 | 0.0045   | 0.00104  | -1.08 | NENF         | neudesin neurotrophic factor                                               | Downregulated |
| A_23_P100 | 0.005121 | 0.00126  | -1.08 | STAT3        | signal transducer and activator of transcription 3 (acute-phase response)  | Downregulated |
| A_33_P327 | 0.005568 | 0.00142  | -1.08 | ZC3H11A      | zinc finger CCCH-type containing 11A                                       | Downregulated |
| A_24_P345 | 0.006688 | 0.00185  | -1.08 | ING5         | inhibitor of growth family, member 5                                       | Downregulated |
| A_33_P325 | 0.007492 | 0.00216  | -1.08 | TP53TG1      | TP53 target 1 (non-protein coding)                                         | Downregulated |
| A_22_P000 | 0.00906  | 0.0028   | -1.08 | lnc-PLCL2-1  | lnc-PLCL2-1:1                                                              | Downregulated |
| A_33_P327 | 0.00906  | 0.0028   | -1.08 | TMEM236      | transmembrane protein 236                                                  | Downregulated |
| A_24_P148 | 0.009631 | 0.00304  | -1.08 | RUVBL1       | RuvB-like AAA ATPase 1                                                     | Downregulated |
| A_22_P000 | 0.010291 | 0.00332  | -1.08 | lnc-KIN-1    | lnc-KIN-1:1                                                                | Downregulated |
| A_33_P360 | 0.013178 | 0.00456  | -1.08 | ILF3-AS1     | ILF3 antisense RNA 1 (head to head)                                        | Downregulated |
| A_33_P335 | 0.015069 | 0.00545  | -1.08 | FAM198A      | family with sequence similarity 198, member A                              | Downregulated |

|           |          |          |       |                |                                                                                     |               |
|-----------|----------|----------|-------|----------------|-------------------------------------------------------------------------------------|---------------|
| A_33_P339 | 0.023121 | 0.0093   | -1.08 | LINC01296      | long intergenic non-protein coding RNA 1296                                         | Downregulated |
| A_32_P855 | 0.029515 | 0.0126   | -1.08 | HCFC2          | host cell factor C2                                                                 | Downregulated |
| A_33_P336 | 0.038334 | 0.0174   | -1.08 | FAM205BP       | transmembrane protein C9orf144B pseudogene                                          | Downregulated |
| A_33_P323 | 0.038334 | 0.0174   | -1.08 | KCNA2          | potassium channel, voltage gated shaker related subfamily A, member 2               | Downregulated |
| A_22_P000 | 0.038334 | 0.0174   | -1.08 | LOC285889      | uncharacterized LOC285889                                                           | Downregulated |
| A_24_P321 | 0.044736 | 0.021    | -1.08 | SLC38A4        | solute carrier family 38, member 4                                                  | Downregulated |
| A_23_P726 | 0.045917 | 0.0217   | -1.08 | GPIHBP1        | glycosylphosphatidylinositol anchored high density lipoprotein binding protein 1    | Downregulated |
| A_33_P329 | 0.062694 | 0.0315   | -1.08 | LMOD1          | leiomodulin 1 (smooth muscle)                                                       | Downregulated |
| A_22_P000 | 0.062694 | 0.0315   | -1.08 | lnc-UBFD1-1    | lnc-UBFD1-1:1                                                                       | Downregulated |
| A_21_P000 | 0.06874  | 0.0351   | -1.08 | LOC1019276     | uncharacterized LOC101927664                                                        | Downregulated |
| A_21_P000 | 0.069545 | 0.0356   | -1.08 | lnc-STIL-3     | lnc-STIL-3:1                                                                        | Downregulated |
| A_24_P185 | 0.001942 | 0.000284 | -1.09 | GSK3A          | glycogen synthase kinase 3 alpha                                                    | Downregulated |
| A_23_P254 | 0.002021 | 0.000306 | -1.09 | RANGRF         | RAN guanine nucleotide release factor                                               | Downregulated |
| A_24_P671 | 0.002046 | 0.000314 | -1.09 | SON            | SON DNA binding protein                                                             | Downregulated |
| A_33_P330 | 0.002166 | 0.000345 | -1.09 | ATF6B          | activating transcription factor 6 beta                                              | Downregulated |
| A_23_P754 | 0.002638 | 0.000466 | -1.09 | NUDT22         | nudix (nucleoside diphosphate linked moiety X)-type motif 22                        | Downregulated |
| A_24_P934 | 0.002949 | 0.000552 | -1.09 | MTCH2          | mitochondrial carrier 2                                                             | Downregulated |
| A_24_P497 | 0.00301  | 0.000571 | -1.09 | IRF2BP2        | interferon regulatory factor 2 binding protein 2                                    | Downregulated |
| A_33_P333 | 0.003041 | 0.000581 | -1.09 | XLOC_I2_015508 |                                                                                     | Downregulated |
| A_23_P172 | 0.003177 | 0.000623 | -1.09 | IAH1           | isoamyl acetate-hydrolyzing esterase 1 homolog (S. cerevisiae)                      | Downregulated |
| A_22_P000 | 0.003287 | 0.000655 | -1.09 | SLC25A29       | solute carrier family 25 (mitochondrial carnitine/acylcarnitine carrier), member 29 | Downregulated |
| A_21_P001 | 0.004632 | 0.00109  | -1.09 | LOC1005055     | uncharacterized LOC100505501                                                        | Downregulated |
| A_24_P211 | 0.005114 | 0.00125  | -1.09 | ICA1L          | islet cell autoantigen 1,69kDa-like                                                 | Downregulated |
| A_21_P000 | 0.005184 | 0.00128  | -1.09 | SNORD71        | small nucleolar RNA, C/D box 71                                                     | Downregulated |
| A_32_P286 | 0.005221 | 0.00129  | -1.09 | SNRPA1         | small nuclear ribonucleoprotein polypeptide A'                                      | Downregulated |
| A_22_P000 | 0.005706 | 0.00147  | -1.09 | LINC01402      | long intergenic non-protein coding RNA 1402                                         | Downregulated |
| A_33_P384 | 0.006428 | 0.00175  | -1.09 | IKZF1          | IKAROS family zinc finger 1 (Ikaros)                                                | Downregulated |
| A_23_P149 | 0.013177 | 0.00456  | -1.09 | EFCAB2         | EF-hand calcium binding domain 2                                                    | Downregulated |
| A_21_P001 | 0.013653 | 0.00477  | -1.09 | LINC00665      | long intergenic non-protein coding RNA 665                                          | Downregulated |
| A_33_P348 | 0.013647 | 0.00477  | -1.09 | PTPN20B        | protein tyrosine phosphatase, non-receptor type 20B                                 | Downregulated |
| A_21_P000 | 0.014643 | 0.00525  | -1.09 | lnc-GINS2-3    | lnc-GINS2-3:1                                                                       | Downregulated |
| A_23_P218 | 0.024384 | 0.00997  | -1.09 | RBM26          | RNA binding motif protein 26                                                        | Downregulated |
| A_33_P321 | 0.031749 | 0.0138   | -1.09 | GPATCH4        | G patch domain containing 4                                                         | Downregulated |
| A_33_P341 | 0.041211 | 0.019    | -1.09 | ZRSR2          | zinc finger (CCCH type), RNA-binding motif and serine/arginine rich 2               | Downregulated |
| A_23_P139 | 0.045974 | 0.0217   | -1.09 | UBAC2          | UBA domain containing 2                                                             | Downregulated |
| A_22_P000 | 0.04728  | 0.0224   | -1.09 | lnc-PRR15L-4   | lnc-PRR15L-4:1                                                                      | Downregulated |
| A_23_P474 | 0.084486 | 0.0451   | -1.09 | ACAD8          | acyl-CoA dehydrogenase family, member 8                                             | Downregulated |



|           |          |          |       |                |                                                                       |               |
|-----------|----------|----------|-------|----------------|-----------------------------------------------------------------------|---------------|
| A_33_P326 | 0.084486 | 0.0451   | -1.09 | GOLGA6L2       | golgin A6 family-like 2                                               | Downregulated |
| A_23_P196 | 0.084486 | 0.0451   | -1.09 | LRP11          | low density lipoprotein receptor-related protein 11                   | Downregulated |
| A_21_P001 | 0.001986 | 0.000297 | -1.1  | XLOC_I2_009539 |                                                                       | Downregulated |
| A_24_P361 | 0.002022 | 0.000306 | -1.1  | NDUFA9         | NADH dehydrogenase (ubiquinone) 1 alpha subcomplex, 9, 39kDa          | Downregulated |
| A_24_P183 | 0.002124 | 0.000335 | -1.1  | PLAC8          | placenta-specific 8                                                   | Downregulated |
| A_22_P000 | 0.00216  | 0.000344 | -1.1  | lnc-SETDB1-1   | lnc-SETDB1-1:1                                                        | Downregulated |
| A_23_P208 | 0.002572 | 0.00045  | -1.1  | SEC11C         | SEC11 homolog C ( <i>S. cerevisiae</i> )                              | Downregulated |
| A_21_P001 | 0.002689 | 0.00048  | -1.1  | LINC00339      | long intergenic non-protein coding RNA 339                            | Downregulated |
| A_23_P166 | 0.002712 | 0.000486 | -1.1  | DCP1A          | decapping mRNA 1A                                                     | Downregulated |
| A_33_P328 | 0.003796 | 0.000809 | -1.1  | LINC01534      | long intergenic non-protein coding RNA 1534                           | Downregulated |
| A_24_P316 | 0.004182 | 0.000932 | -1.1  | NDUFA10        | NADH dehydrogenase (ubiquinone) 1 alpha subcomplex, 10, 42kDa         | Downregulated |
| A_21_P000 | 0.004318 | 0.00098  | -1.1  | C2orf48        | chromosome 2 open reading frame 48                                    | Downregulated |
| A_22_P000 | 0.004324 | 0.000982 | -1.1  | lnc-NPAT-2     | lnc-NPAT-2:1                                                          | Downregulated |
| A_23_P414 | 0.004432 | 0.00102  | -1.1  | DDX60          | DEAD (Asp-Glu-Ala-Asp) box polypeptide 60                             | Downregulated |
| A_33_P329 | 0.004864 | 0.00117  | -1.1  | ARID1B         | AT rich interactive domain 1B (SWI1-like)                             | Downregulated |
| A_33_P321 | 0.005004 | 0.00121  | -1.1  | TM9SF1         | transmembrane 9 superfamily member 1                                  | Downregulated |
| A_21_P001 | 0.005562 | 0.00142  | -1.1  | MIR4435-1H     | MIR4435-1 host gene (non-protein coding)                              | Downregulated |
| A_23_P160 | 0.006528 | 0.00179  | -1.1  | UAP1           | UDP-N-acetylglucosamine pyrophosphorylase 1                           | Downregulated |
| A_21_P001 | 0.007287 | 0.00208  | -1.1  | XLOC_I2_005438 |                                                                       | Downregulated |
| A_33_P342 | 0.009679 | 0.00306  | -1.1  | FXYD5          | FXYD domain containing ion transport regulator 5                      | Downregulated |
| A_23_P649 | 0.011268 | 0.00373  | -1.1  | TNRC6B         | trinucleotide repeat containing 6B                                    | Downregulated |
| A_24_P194 | 0.011813 | 0.00397  | -1.1  | SMEK2          | SMEK homolog 2, suppressor of mek1 ( <i>Dictyostelium</i> )           | Downregulated |
| A_24_P139 | 0.017407 | 0.00655  | -1.1  | USP25          | ubiquitin specific peptidase 25                                       | Downregulated |
| A_21_P000 | 0.019522 | 0.00755  | -1.1  | lnc-KATNAL2    | lnc-KATNAL2-4:1                                                       | Downregulated |
| A_23_P256 | 0.027577 | 0.0116   | -1.1  | RDH11          | retinol dehydrogenase 11 (all-trans/9-cis/11-cis)                     | Downregulated |
| A_23_P161 | 0.040057 | 0.0184   | -1.1  | HPX            | hemopexin                                                             | Downregulated |
| A_32_P922 | 0.071673 | 0.0369   | -1.1  | PMS2P9         | postmeiotic segregation increased 2 pseudogene 9                      | Downregulated |
| A_23_P526 | 0.001866 | 0.000266 | -1.11 | COX8A          | cytochrome c oxidase subunit VIIIA (ubiquitous)                       | Downregulated |
| A_23_P420 | 0.001933 | 0.000282 | -1.11 | BRK1           | BRICK1, SCAR/WAVE actin-nucleating complex subunit                    | Downregulated |
| A_22_P000 | 0.002145 | 0.00034  | -1.11 | lnc-VN1R2-1    | lnc-VN1R2-1:4                                                         | Downregulated |
| A_23_P371 | 0.002326 | 0.000385 | -1.11 | ICOS           | inducible T-cell co-stimulator                                        | Downregulated |
| A_24_P174 | 0.002375 | 0.000397 | -1.11 | FBXW7          | F-box and WD repeat domain containing 7, E3 ubiquitin protein ligase  | Downregulated |
| A_33_P339 | 0.002429 | 0.00041  | -1.11 | DIXDC1         | DIX domain containing 1                                               | Downregulated |
| A_24_P241 | 0.002457 | 0.000417 | -1.11 | JUNB           | jun B proto-oncogene                                                  | Downregulated |
| A_33_P329 | 0.002517 | 0.000434 | -1.11 | PRKCB          | protein kinase C, beta                                                | Downregulated |
| A_23_P213 | 0.003001 | 0.000568 | -1.11 | SMARCAD1       | SWI/SNF-related, matrix-associated actin-dependent regulator of chrom | Downregulated |
| A_33_P322 | 0.003033 | 0.000578 | -1.11 | SCIMP          | SLP adaptor and CSK interacting membrane protein                      | Downregulated |

|           |          |          |       |                |                                                                         |               |
|-----------|----------|----------|-------|----------------|-------------------------------------------------------------------------|---------------|
| A_33_P333 | 0.003423 | 0.000695 | -1.11 | PLEKHA2        | pleckstrin homology domain containing, family A (phosphoinositide bindi | Downregulated |
| A_33_P341 | 0.003929 | 0.000851 | -1.11 | GLIPR1         | GLI pathogenesis-related 1                                              | Downregulated |
| A_21_P001 | 0.004341 | 0.000989 | -1.11 | XLOC_I2_007167 |                                                                         | Downregulated |
| A_22_P000 | 0.005709 | 0.00147  | -1.11 | lnc-SLC39A11   | lnc-SLC39A10-3:1                                                        | Downregulated |
| A_32_P167 | 0.006586 | 0.00181  | -1.11 | MED14OS        | MED14 opposite strand                                                   | Downregulated |
| A_24_P107 | 0.006885 | 0.00192  | -1.11 | USP2           | ubiquitin specific peptidase 2                                          | Downregulated |
| A_33_P338 | 0.006988 | 0.00197  | -1.11 | C5orf56        | chromosome 5 open reading frame 56                                      | Downregulated |
| A_33_P337 | 0.008925 | 0.00274  | -1.11 | lnc-FCGR3B-2   | lnc-FCGR3B-2:1                                                          | Downregulated |
| A_21_P000 | 0.015117 | 0.00547  | -1.11 | lnc-KCND3-1    | lnc-KCND3-1:1                                                           | Downregulated |
| A_23_P138 | 0.01924  | 0.00741  | -1.11 | KAT5           | K(lysine) acetyltransferase 5                                           | Downregulated |
| A_33_P326 | 0.023072 | 0.00927  | -1.11 | PCK2           | phosphoenolpyruvate carboxykinase 2 (mitochondrial)                     | Downregulated |
| A_22_P000 | 0.031142 | 0.0135   | -1.11 | LOC1027245     | uncharacterized LOC102724598                                            | Downregulated |
| A_21_P000 | 0.033859 | 0.015    | -1.11 | lnc-RAMP3-2    | lnc-RAMP3-2:1                                                           | Downregulated |
| A_23_P302 | 0.038195 | 0.0174   | -1.11 | PCDHB16        | protocadherin beta 16                                                   | Downregulated |
| A_24_P883 | 0.048785 | 0.0233   | -1.11 | C2orf49        | chromosome 2 open reading frame 49                                      | Downregulated |
| A_23_P380 | 0.065461 | 0.0331   | -1.11 | NAGPA          | N-acetylglucosamine-1-phosphodiester alpha-N-acetylglucosaminidase      | Downregulated |
| A_21_P000 | 0.070008 | 0.0359   | -1.11 | LOC1027249     | uncharacterized LOC102724943                                            | Downregulated |
| A_23_P106 | 0.072703 | 0.0375   | -1.11 | PSEN1          | presenilin 1                                                            | Downregulated |
| A_24_P418 | 0.089223 | 0.0483   | -1.11 | ARHGAP6        | Rho GTPase activating protein 6                                         | Downregulated |
| A_33_P343 | 0.002006 | 0.000302 | -1.12 | ZC3H14         | zinc finger CCCH-type containing 14                                     | Downregulated |
| A_23_P124 | 0.002154 | 0.000342 | -1.12 | MED24          | mediator complex subunit 24                                             | Downregulated |
| A_24_P166 | 0.002397 | 0.000403 | -1.12 | TMEM60         | transmembrane protein 60                                                | Downregulated |
| A_23_P159 | 0.002515 | 0.000434 | -1.12 | PHKA2          | phosphorylase kinase, alpha 2 (liver)                                   | Downregulated |
| A_23_P168 | 0.002823 | 0.000516 | -1.12 | TXNDC5         | thioredoxin domain containing 5 (endoplasmic reticulum)                 | Downregulated |
| A_19_P003 | 0.005578 | 0.00143  | -1.12 | H19            | H19, imprinted maternally expressed transcript (non-protein coding)     | Downregulated |
| A_23_P361 | 0.00588  | 0.00154  | -1.12 | ATF7           | activating transcription factor 7                                       | Downregulated |
| A_33_P324 | 0.005942 | 0.00156  | -1.12 | LTB            | lymphotoxin beta (TNF superfamily, member 3)                            | Downregulated |
| A_24_P289 | 0.006203 | 0.00166  | -1.12 | TFF3           | trefoil factor 3 (intestinal)                                           | Downregulated |
| A_22_P000 | 0.006435 | 0.00175  | -1.12 | lnc-AIPL1-2    | lnc-AIPL1-2:3                                                           | Downregulated |
| A_33_P363 | 0.007013 | 0.00198  | -1.12 | UBE2D4         | ubiquitin-conjugating enzyme E2D 4 (putative)                           | Downregulated |
| A_22_P000 | 0.008876 | 0.00272  | -1.12 | lnc-DLX2-2     | lnc-DLX2-2:1                                                            | Downregulated |
| A_22_P000 | 0.009998 | 0.00319  | -1.12 | lnc-ALPK3-1    | lnc-ALPK3-1:1                                                           | Downregulated |
| A_21_P000 | 0.014945 | 0.00539  | -1.12 | SNORA19        | small nucleolar RNA, H/ACA box 19                                       | Downregulated |
| A_33_P324 | 0.016327 | 0.00605  | -1.12 | NEFM           | neurofilament, medium polypeptide                                       | Downregulated |
| A_24_P362 | 0.016327 | 0.00605  | -1.12 | PAX3           | paired box 3                                                            | Downregulated |
| A_23_P257 | 0.021938 | 0.00872  | -1.12 | NUP214         | nucleoporin 214kDa                                                      | Downregulated |
| A_33_P337 | 0.023875 | 0.0097   | -1.12 | TMEM106B       | transmembrane protein 106B                                              | Downregulated |

|           |          |          |       |                |                                                                |               |
|-----------|----------|----------|-------|----------------|----------------------------------------------------------------|---------------|
| A_24_P202 | 0.025367 | 0.0105   | -1.12 | METTL9         | methyltransferase like 9                                       | Downregulated |
| A_21_P001 | 0.02671  | 0.0112   | -1.12 | XLOC_I2_011627 |                                                                | Downregulated |
| A_22_P000 | 0.027602 | 0.0116   | -1.12 | lnc-EIF2AK3-   | lnc-EIF2AK3-4:2                                                | Downregulated |
| A_21_P001 | 0.029687 | 0.0127   | -1.12 | LINC-PINT      | long intergenic non-protein coding RNA, p53 induced transcript | Downregulated |
| A_33_P321 | 0.030226 | 0.013    | -1.12 | ELF2           | E74-like factor 2 (ets domain transcription factor)            | Downregulated |
| A_21_P000 | 0.034154 | 0.0151   | -1.12 | lnc-RGMA-9     | lnc-RGMA-9:2                                                   | Downregulated |
| A_22_P000 | 0.035468 | 0.0159   | -1.12 | DISC1-IT1      | DISC1 intronic transcript 1 (non-protein coding)               | Downregulated |
| A_22_P000 | 0.036418 | 0.0164   | -1.12 | LOC1027247     | uncharacterized LOC102724776                                   | Downregulated |
| A_32_P967 | 0.045156 | 0.0213   | -1.12 | SHCBP1         | SHC SH2-domain binding protein 1                               | Downregulated |
| A_22_P000 | 0.050103 | 0.0241   | -1.12 | LINC01021      | long intergenic non-protein coding RNA 1021                    | Downregulated |
| A_24_P217 | 0.050382 | 0.0242   | -1.12 | RAD9A          | RAD9 homolog A (S. pombe)                                      | Downregulated |
| A_22_P000 | 0.069343 | 0.0354   | -1.12 | lnc-ATP6V1E    | lnc-ATP6V1E2-3:1                                               | Downregulated |
| A_23_P134 | 0.074516 | 0.0386   | -1.12 | COL26A1        | collagen, type XXVI, alpha 1                                   | Downregulated |
| A_22_P000 | 0.079443 | 0.0418   | -1.12 | lnc-RTN3-1     | lnc-RTN3-1:1                                                   | Downregulated |
| A_32_P952 | 0.001821 | 0.000255 | -1.13 | FDPSP2         | farnesyl diphosphate synthase pseudogene 2                     | Downregulated |
| A_23_P325 | 0.001845 | 0.000261 | -1.13 | SKI            | SKI proto-oncogene                                             | Downregulated |
| A_22_P000 | 0.001901 | 0.000274 | -1.13 | TMEM258        | transmembrane protein 258                                      | Downregulated |
| A_33_P340 | 0.001958 | 0.000289 | -1.13 | VAMP2          | vesicle-associated membrane protein 2 (synaptobrevin 2)        | Downregulated |
| A_33_P341 | 0.002203 | 0.000355 | -1.13 | DNAJC5         | DnaJ (Hsp40) homolog, subfamily C, member 5                    | Downregulated |
| A_23_P346 | 0.002241 | 0.000365 | -1.13 | MTOR           | mechanistic target of rapamycin (serine/threonine kinase)      | Downregulated |
| A_33_P341 | 0.002336 | 0.000387 | -1.13 | LOC645645      | uncharacterized LOC645645                                      | Downregulated |
| A_23_P156 | 0.002764 | 0.000501 | -1.13 | UQCC2          | ubiquinol-cytochrome c reductase complex assembly factor 2     | Downregulated |
| A_33_P324 | 0.002803 | 0.000511 | -1.13 | MAP3K8         | mitogen-activated protein kinase kinase kinase 8               | Downregulated |
| A_33_P385 | 0.002832 | 0.000519 | -1.13 | KIAA0319L      | KIAA0319-like                                                  | Downregulated |
| A_23_P102 | 0.003511 | 0.00072  | -1.13 | PDE6D          | phosphodiesterase 6D, cGMP-specific, rod, delta                | Downregulated |
| A_21_P000 | 0.003533 | 0.000728 | -1.13 | lnc-SGCG-5     | lnc-SGCG-5:3                                                   | Downregulated |
| A_24_P142 | 0.003721 | 0.000786 | -1.13 | AKAP13         | A kinase (PRKA) anchor protein 13                              | Downregulated |
| A_21_P000 | 0.003789 | 0.000806 | -1.13 | lnc-AC099552   | lnc-AC099552.4.1-1:2                                           | Downregulated |
| A_22_P000 | 0.004411 | 0.00101  | -1.13 | lnc-TMEM85-    | lnc-TMEM85-1:1                                                 | Downregulated |
| A_23_P118 | 0.005231 | 0.0013   | -1.13 | SLFN12         | schlafen family member 12                                      | Downregulated |
| A_23_P490 | 0.005268 | 0.00131  | -1.13 | WDR61          | WD repeat domain 61                                            | Downregulated |
| A_23_P397 | 0.006108 | 0.00162  | -1.13 | INIP           | INTS3 and NABP interacting protein                             | Downregulated |
| A_23_P942 | 0.006365 | 0.00172  | -1.13 | LONRF1         | LON peptidase N-terminal domain and ring finger 1              | Downregulated |
| A_23_P551 | 0.007225 | 0.00206  | -1.13 | RANGRF         | RAN guanine nucleotide release factor                          | Downregulated |
| A_22_P000 | 0.007332 | 0.0021   | -1.13 | LOC1001310     | uncharacterized LOC100131047                                   | Downregulated |
| A_23_P383 | 0.007698 | 0.00224  | -1.13 | CD300LG        | CD300 molecule-like family member g                            | Downregulated |
| A_22_P000 | 0.008796 | 0.00269  | -1.13 | lnc-TMX3-1     | lnc-TMX3-1:1                                                   | Downregulated |

|           |          |          |       |                |                                                                  |               |
|-----------|----------|----------|-------|----------------|------------------------------------------------------------------|---------------|
| A_23_P409 | 0.008796 | 0.00269  | -1.13 | PPFIBP2        | PTPRF interacting protein, binding protein 2 (liprin beta 2)     | Downregulated |
| A_32_P957 | 0.009012 | 0.00278  | -1.13 | FANCI          | Fanconi anemia, complementation group I                          | Downregulated |
| A_23_P206 | 0.014984 | 0.00541  | -1.13 | NDE1           | nudE neurodevelopment protein 1                                  | Downregulated |
| A_33_P339 | 0.0158   | 0.00578  | -1.13 | C10orf99       | chromosome 10 open reading frame 99                              | Downregulated |
| A_23_P377 | 0.016556 | 0.00615  | -1.13 | FHOD1          | formin homology 2 domain containing 1                            | Downregulated |
| A_21_P000 | 0.024386 | 0.00997  | -1.13 | lnc-C16orf72-  | lnc-C16orf72-5:1                                                 | Downregulated |
| A_23_P129 | 0.026911 | 0.0113   | -1.13 | ATF7IP2        | activating transcription factor 7 interacting protein 2          | Downregulated |
| A_22_P000 | 0.030866 | 0.0134   | -1.13 | lnc-ALDH9A1    | lnc-ALDH9A1-1:1                                                  | Downregulated |
| A_24_P131 | 0.030866 | 0.0134   | -1.13 | MYL3           | myosin, light chain 3, alkali; ventricular, skeletal, slow       | Downregulated |
| A_23_P423 | 0.037331 | 0.0169   | -1.13 | PHC2           | polyhomeotic homolog 2 (Drosophila)                              | Downregulated |
| A_23_P113 | 0.045493 | 0.0214   | -1.13 | P4HTM          | prolyl 4-hydroxylase, transmembrane (endoplasmic reticulum)      | Downregulated |
| A_22_P000 | 0.060062 | 0.0299   | -1.13 | lnc-TMCO3-2    | lnc-TMCO3-2:1                                                    | Downregulated |
| A_21_P000 | 0.063206 | 0.0318   | -1.13 | lnc-MAT2B-3    | lnc-MAT2B-3:15                                                   | Downregulated |
| A_24_P237 | 0.088541 | 0.0478   | -1.13 | NCOR1          | nuclear receptor corepressor 1                                   | Downregulated |
| A_21_P000 | 0.091508 | 0.0498   | -1.13 | lnc-CACNG3-    | lnc-CACNG3-1:4                                                   | Downregulated |
| A_23_P255 | 0.001962 | 0.000291 | -1.14 | GPR183         | G protein-coupled receptor 183                                   | Downregulated |
| A_32_P402 | 0.001972 | 0.000293 | -1.14 | TMEM200A       | transmembrane protein 200A                                       | Downregulated |
| A_24_P350 | 0.00206  | 0.000317 | -1.14 | PRRC2B         | proline-rich coiled-coil 2B                                      | Downregulated |
| A_23_P133 | 0.002167 | 0.000346 | -1.14 | CCDC167        | coiled-coil domain containing 167                                | Downregulated |
| A_19_P003 | 0.002241 | 0.000365 | -1.14 | ATP2C1         | ATPase, Ca <sup>++</sup> transporting, type 2C, member 1         | Downregulated |
| A_23_P475 | 0.002243 | 0.000366 | -1.14 | TMEM258        | transmembrane protein 258                                        | Downregulated |
| A_33_P329 | 0.002476 | 0.000422 | -1.14 | FAM204A        | family with sequence similarity 204, member A                    | Downregulated |
| A_33_P329 | 0.002503 | 0.000431 | -1.14 | MVP            | major vault protein                                              | Downregulated |
| A_22_P000 | 0.002503 | 0.000431 | -1.14 | PDE10A         | phosphodiesterase 10A                                            | Downregulated |
| A_23_P303 | 0.002952 | 0.000553 | -1.14 | TAS2R45        | taste receptor, type 2, member 45                                | Downregulated |
| A_21_P001 | 0.003132 | 0.000608 | -1.14 | XLOC_I2_006789 |                                                                  | Downregulated |
| A_23_P253 | 0.003189 | 0.000626 | -1.14 | CD99L2         | CD99 molecule-like 2                                             | Downregulated |
| A_23_P591 | 0.003363 | 0.000678 | -1.14 | POU5F1         | POU class 5 homeobox 1                                           | Downregulated |
| A_21_P000 | 0.005126 | 0.00126  | -1.14 | lnc-ZBTB17-2   | lnc-ZBTB17-2:1                                                   | Downregulated |
| A_23_P118 | 0.005191 | 0.00128  | -1.14 | EXTL2          | exostosin-like glycosyltransferase 2                             | Downregulated |
| A_21_P001 | 0.005196 | 0.00128  | -1.14 | LOC1001301     | uncharacterized LOC100130156                                     | Downregulated |
| A_23_P879 | 0.006336 | 0.00171  | -1.14 | DYRK4          | dual-specificity tyrosine-(Y)-phosphorylation regulated kinase 4 | Downregulated |
| A_22_P000 | 0.009281 | 0.00289  | -1.14 | LOC1019288     | uncharacterized LOC101928812                                     | Downregulated |
| A_33_P388 | 0.009391 | 0.00293  | -1.14 | POT1           | protection of telomeres 1                                        | Downregulated |
| A_22_P000 | 0.009912 | 0.00316  | -1.14 | lnc-CLEC3A-4   | lnc-CLEC3A-4:1                                                   | Downregulated |
| A_23_P107 | 0.010132 | 0.00326  | -1.14 | RAB5C          | RAB5C, member RAS oncogene family                                | Downregulated |
| A_23_P413 | 0.015334 | 0.00557  | -1.14 | P2RX5          | purinergic receptor P2X, ligand gated ion channel, 5             | Downregulated |

|           |          |          |       |             |                                                       |               |
|-----------|----------|----------|-------|-------------|-------------------------------------------------------|---------------|
| A_23_P146 | 0.020326 | 0.00792  | -1.14 | CORO2A      | coronin, actin binding protein, 2A                    | Downregulated |
| A_33_P331 | 0.021337 | 0.00842  | -1.14 | TBCB        | tubulin folding cofactor B                            | Downregulated |
| A_33_P336 | 0.022942 | 0.00921  | -1.14 | NFYC        | nuclear transcription factor Y, gamma                 | Downregulated |
| A_21_P000 | 0.028614 | 0.0122   | -1.14 | LINC01229   | long intergenic non-protein coding RNA 1229           | Downregulated |
| A_23_P129 | 0.045011 | 0.0212   | -1.14 | VPS9D1      | VPS9 domain containing 1                              | Downregulated |
| A_24_P608 | 0.045613 | 0.0215   | -1.14 | ACHE        | acetylcholinesterase (Yt blood group)                 | Downregulated |
| A_23_P212 | 0.060616 | 0.0302   | -1.14 | VPRBP       | Vpr (HIV-1) binding protein                           | Downregulated |
| A_23_P211 | 0.083962 | 0.0447   | -1.14 | LINC01547   | long intergenic non-protein coding RNA 1547           | Downregulated |
| A_33_P342 | 0.001815 | 0.000253 | -1.15 | SON         | SON DNA binding protein                               | Downregulated |
| A_22_P000 | 0.001858 | 0.000264 | -1.15 | lnc-YIF1A-1 | lnc-YIF1A-1:2                                         | Downregulated |
| A_33_P341 | 0.001903 | 0.000274 | -1.15 | ACLY        | ATP citrate lyase                                     | Downregulated |
| A_23_P204 | 0.001923 | 0.000279 | -1.15 | CDKN1B      | cyclin-dependent kinase inhibitor 1B (p27, Kip1)      | Downregulated |
| A_24_P394 | 0.001956 | 0.000289 | -1.15 | SHISA5      | shisa family member 5                                 | Downregulated |
| A_21_P000 | 0.001962 | 0.000291 | -1.15 | lnc-TRAK1-1 | lnc-TRAK1-1:1                                         | Downregulated |
| A_32_P129 | 0.002142 | 0.000339 | -1.15 | RAB1B       | RAB1B, member RAS oncogene family                     | Downregulated |
| A_24_P926 | 0.00216  | 0.000344 | -1.15 | UBE2D3      | ubiquitin-conjugating enzyme E2D 3                    | Downregulated |
| A_33_P325 | 0.002309 | 0.000381 | -1.15 | SNX17       | sorting nexin 17                                      | Downregulated |
| A_23_P331 | 0.002476 | 0.000423 | -1.15 | HIATL1      | hippocampus abundant transcript-like 1                | Downregulated |
| A_21_P001 | 0.002645 | 0.000468 | -1.15 | ZNF767P     | zinc finger family member 767, pseudogene             | Downregulated |
| A_24_P328 | 0.002989 | 0.000564 | -1.15 | YIPF5       | Yip1 domain family, member 5                          | Downregulated |
| A_23_P264 | 0.00308  | 0.000591 | -1.15 | RHBDL1      | rhomboid, veinlet-like 1 (Drosophila)                 | Downregulated |
| A_22_P000 | 0.003286 | 0.000655 | -1.15 | RPARP-AS1   | RPARP antisense RNA 1                                 | Downregulated |
| A_23_P382 | 0.00348  | 0.000712 | -1.15 | OR1F2P      | olfactory receptor, family 1, subfamily F, member 2   | Downregulated |
| A_23_P403 | 0.00379  | 0.000806 | -1.15 | DZANK1      | double zinc ribbon and ankyrin repeat domains 1       | Downregulated |
| A_23_P229 | 0.004003 | 0.000874 | -1.15 | SLC30A7     | solute carrier family 30 (zinc transporter), member 7 | Downregulated |
| A_24_P287 | 0.004119 | 0.00091  | -1.15 | RSAD2       | radical S-adenosyl methionine domain containing 2     | Downregulated |
| A_32_P959 | 0.005191 | 0.00128  | -1.15 | CLEC2D      | C-type lectin domain family 2, member D               | Downregulated |
| A_33_P328 | 0.005238 | 0.0013   | -1.15 | PYGO2       | pygopus family PHD finger 2                           | Downregulated |
| A_19_P003 | 0.00537  | 0.00135  | -1.15 | lnc-GGCT-1  | lnc-GGCT-1:14                                         | Downregulated |
| A_22_P000 | 0.009013 | 0.00278  | -1.15 | LOC1005062  | uncharacterized LOC100506274                          | Downregulated |
| A_24_P372 | 0.010267 | 0.00331  | -1.15 | EDRF1       | erythroid differentiation regulatory factor 1         | Downregulated |
| A_23_P105 | 0.017082 | 0.0064   | -1.15 | MDM1        | Mdm1 nuclear protein homolog (mouse)                  | Downregulated |
| A_33_P324 | 0.018994 | 0.00729  | -1.15 | ZNF680      | zinc finger protein 680                               | Downregulated |
| A_21_P001 | 0.026876 | 0.0113   | -1.15 | TRAK1       | trafficking protein, kinesin binding 1                | Downregulated |
| A_33_P334 | 0.027505 | 0.0116   | -1.15 | ZNF568      | zinc finger protein 568                               | Downregulated |
| A_23_P807 | 0.028781 | 0.0123   | -1.15 | PLCD1       | phospholipase C, delta 1                              | Downregulated |
| A_21_P001 | 0.029432 | 0.0126   | -1.15 | LOC1019282  | uncharacterized LOC101928203                          | Downregulated |

|           |          |          |       |                |                                                                         |               |
|-----------|----------|----------|-------|----------------|-------------------------------------------------------------------------|---------------|
| A_21_P000 | 0.029561 | 0.0127   | -1.15 | lnc-TSSC4-2    | lnc-TSSC4-2:1                                                           | Downregulated |
| A_33_P341 | 0.031218 | 0.0136   | -1.15 | CHAF1A         | chromatin assembly factor 1, subunit A (p150)                           | Downregulated |
| A_22_P000 | 0.036218 | 0.0163   | -1.15 | lnc-CETP-1     | lnc-CETP-1:1                                                            | Downregulated |
| A_23_P862 | 0.042305 | 0.0196   | -1.15 | PIGC           | phosphatidylinositol glycan anchor biosynthesis, class C                | Downregulated |
| A_33_P326 | 0.049406 | 0.0237   | -1.15 | CPTP           | ceramide-1-phosphate transfer protein                                   | Downregulated |
| A_21_P001 | 0.050068 | 0.024    | -1.15 | ZNF37BP        | zinc finger protein 37B, pseudogene                                     | Downregulated |
| A_33_P340 | 0.073132 | 0.0378   | -1.15 | DEFB108B       | defensin, beta 108B                                                     | Downregulated |
| A_24_P120 | 0.075523 | 0.0393   | -1.15 | GADD45G        | growth arrest and DNA-damage-inducible, gamma                           | Downregulated |
| A_23_P118 | 0.082713 | 0.0439   | -1.15 | ATP2B4         | ATPase, Ca <sup>++</sup> transporting, plasma membrane 4                | Downregulated |
| A_33_P340 | 0.001959 | 0.00029  | -1.16 | SELL           | selectin L                                                              | Downregulated |
| A_33_P337 | 0.002053 | 0.000315 | -1.16 | LYPLA2         | lysophospholipase II                                                    | Downregulated |
| A_23_P869 | 0.00219  | 0.000352 | -1.16 | FADD           | Fas (TNFRSF6)-associated via death domain                               | Downregulated |
| A_21_P000 | 0.00241  | 0.000406 | -1.16 | SNORD22        | small nucleolar RNA, C/D box 22                                         | Downregulated |
| A_22_P000 | 0.002572 | 0.00045  | -1.16 | LOC1005070     | uncharacterized LOC100507006                                            | Downregulated |
| A_22_P000 | 0.002921 | 0.000544 | -1.16 | lnc-CCDC68-2   | lnc-CCDC68-2:1                                                          | Downregulated |
| A_23_P115 | 0.003103 | 0.0006   | -1.16 | FUCA1          | fucosidase, alpha-L- 1, tissue                                          | Downregulated |
| A_33_P326 | 0.004804 | 0.00114  | -1.16 | PCBP4          | poly(rC) binding protein 4                                              | Downregulated |
| A_23_P406 | 0.008025 | 0.00237  | -1.16 | CAMSAP2        | calmodulin regulated spectrin-associated protein family, member 2       | Downregulated |
| A_23_P347 | 0.011448 | 0.00381  | -1.16 | TFCP2          | transcription factor CP2                                                | Downregulated |
| A_32_P175 | 0.01785  | 0.00675  | -1.16 | RCN2           | reticulocalbin 2, EF-hand calcium binding domain                        | Downregulated |
| A_21_P001 | 0.021111 | 0.0083   | -1.16 | XLOC_I2_009139 |                                                                         | Downregulated |
| A_33_P327 | 0.02899  | 0.0124   | -1.16 | NUP35          | nucleoporin 35kDa                                                       | Downregulated |
| A_21_P000 | 0.045082 | 0.0212   | -1.16 | IL10RB-AS1     | IL10RB antisense RNA 1 (head to head)                                   | Downregulated |
| A_23_P154 | 0.051891 | 0.0251   | -1.16 | AOX1           | aldehyde oxidase 1                                                      | Downregulated |
| A_21_P001 | 0.055447 | 0.0272   | -1.16 | XLOC_I2_012806 |                                                                         | Downregulated |
| A_21_P000 | 0.057473 | 0.0284   | -1.16 | RNASEH1-AS     | RNASEH1 antisense RNA 1                                                 | Downregulated |
| A_23_P102 | 0.061663 | 0.0309   | -1.16 | TXNRD2         | thioredoxin reductase 2                                                 | Downregulated |
| A_32_P389 | 0.089753 | 0.0486   | -1.16 | HEATR5B        | HEAT repeat containing 5B                                               | Downregulated |
| A_33_P339 | 0.001684 | 0.000221 | -1.17 | MBNL2          | muscleblind-like splicing regulator 2                                   | Downregulated |
| A_33_P333 | 0.001753 | 0.000237 | -1.17 | ARID1B         | AT rich interactive domain 1B (SWI1-like)                               | Downregulated |
| A_23_P208 | 0.001753 | 0.000237 | -1.17 | NDUFA3         | NADH dehydrogenase (ubiquinone) 1 alpha subcomplex, 3, 9kDa             | Downregulated |
| A_33_P322 | 0.00178  | 0.000244 | -1.17 | NCF1B          | neutrophil cytosolic factor 1B pseudogene                               | Downregulated |
| A_19_P008 | 0.001791 | 0.000247 | -1.17 | BRK1           | BRICK1, SCAR/WAVE actin-nucleating complex subunit                      | Downregulated |
| A_23_P170 | 0.001805 | 0.00025  | -1.17 | ANTXR2         | anthrax toxin receptor 2                                                | Downregulated |
| A_33_P330 | 0.001824 | 0.000255 | -1.17 | LOC1001291     | uncharacterized LOC100129129                                            | Downregulated |
| A_33_P328 | 0.001849 | 0.000262 | -1.17 | POMGNT1        | protein O-linked mannose N-acetylglucosaminyltransferase 1 (beta 1,2,-) | Downregulated |
| A_22_P000 | 0.001876 | 0.000268 | -1.17 | NAPSB          | napsin B aspartic peptidase, pseudogene                                 | Downregulated |

|           |          |          |       |                |                                                                                  |               |
|-----------|----------|----------|-------|----------------|----------------------------------------------------------------------------------|---------------|
| A_23_P930 | 0.001916 | 0.000277 | -1.17 | SRP19          | signal recognition particle 19kDa                                                | Downregulated |
| A_33_P332 | 0.001992 | 0.000298 | -1.17 | ATP7A          | ATPase, Cu <sup>++</sup> transporting, alpha polypeptide                         | Downregulated |
| A_23_P214 | 0.001995 | 0.000299 | -1.17 | FLOT1          | flotillin 1                                                                      | Downregulated |
| A_24_P997 | 0.00204  | 0.000312 | -1.17 | ISOC2          | isochorismatase domain containing 2                                              | Downregulated |
| A_22_P000 | 0.00206  | 0.000317 | -1.17 | lnc-CNPY3-1    | lnc-CNPY3-1:1                                                                    | Downregulated |
| A_23_P372 | 0.002303 | 0.000379 | -1.17 | AHSA2          | AHA1, activator of heat shock 90kDa protein ATPase homolog 2 (yeast)             | Downregulated |
| A_23_P162 | 0.002625 | 0.000463 | -1.17 | CNOT2          | CCR4-NOT transcription complex, subunit 2                                        | Downregulated |
| A_22_P000 | 0.002659 | 0.000472 | -1.17 | lnc-VN1R2-1    | lnc-VN1R2-1:1                                                                    | Downregulated |
| A_23_P409 | 0.002775 | 0.000504 | -1.17 | HNRNPUL2       | heterogeneous nuclear ribonucleoprotein U-like 2                                 | Downregulated |
| A_23_P349 | 0.003046 | 0.000582 | -1.17 | ATF3           | activating transcription factor 3                                                | Downregulated |
| A_33_P329 | 0.003964 | 0.000862 | -1.17 | LMO4           | LIM domain only 4                                                                | Downregulated |
| A_23_P823 | 0.004301 | 0.000973 | -1.17 | SLC25A13       | solute carrier family 25 (aspartate/glutamate carrier), member 13                | Downregulated |
| A_24_P801 | 0.004333 | 0.000985 | -1.17 | TMEM127        | transmembrane protein 127                                                        | Downregulated |
| A_33_P330 | 0.004801 | 0.00114  | -1.17 | TRIM10         | tripartite motif containing 10                                                   | Downregulated |
| A_19_P003 | 0.005098 | 0.00125  | -1.17 | HCG18          | HLA complex group 18 (non-protein coding)                                        | Downregulated |
| A_21_P001 | 0.006202 | 0.00166  | -1.17 | XLOC_I2_005276 |                                                                                  | Downregulated |
| A_23_P830 | 0.006645 | 0.00183  | -1.17 | HIATL1         | hippocampus abundant transcript-like 1                                           | Downregulated |
| A_33_P325 | 0.009508 | 0.00298  | -1.17 | P3H4           | prolyl 3-hydroxylase family member 4 (non-enzymatic)                             | Downregulated |
| A_22_P000 | 0.011562 | 0.00387  | -1.17 | lnc-DALRD3-1   | lnc-DALRD3-1:1                                                                   | Downregulated |
| A_22_P000 | 0.011812 | 0.00397  | -1.17 | lnc-DLX2-5     | lnc-DLX2-5:2                                                                     | Downregulated |
| A_21_P000 | 0.01988  | 0.00772  | -1.17 | OSTM1-AS1      | OSTM1 antisense RNA 1                                                            | Downregulated |
| A_24_P201 | 0.026043 | 0.0108   | -1.17 | FGFBP3         | fibroblast growth factor binding protein 3                                       | Downregulated |
| A_21_P000 | 0.034076 | 0.0151   | -1.17 | ZRANB2-AS1     | ZRANB2 antisense RNA 1                                                           | Downregulated |
| A_22_P000 | 0.037888 | 0.0172   | -1.17 | LINC00877      | long intergenic non-protein coding RNA 877                                       | Downregulated |
| A_33_P324 | 0.042428 | 0.0197   | -1.17 | LUC7L3         | LUC7-like 3 (S. cerevisiae)                                                      | Downregulated |
| A_33_P340 | 0.044274 | 0.0207   | -1.17 | KIF2A          | kinesin heavy chain member 2A                                                    | Downregulated |
| A_22_P000 | 0.063964 | 0.0322   | -1.17 | lnc-CCNE2-1    | lnc-CCNE2-1:1                                                                    | Downregulated |
| A_22_P000 | 0.065575 | 0.0332   | -1.17 | lnc-APOBEC4    | lnc-APOBEC4-1:1                                                                  | Downregulated |
| A_33_P339 | 0.073875 | 0.0382   | -1.17 | GLTSCR1        | glioma tumor suppressor candidate region gene 1                                  | Downregulated |
| A_23_P255 | 0.001698 | 0.000225 | -1.18 | SMPD4          | sphingomyelin phosphodiesterase 4, neutral membrane (neutral sphingomyelinase 4) | Downregulated |
| A_33_P333 | 0.001715 | 0.00023  | -1.18 | PTMS           | parathymosin                                                                     | Downregulated |
| A_23_P247 | 0.001827 | 0.000257 | -1.18 | COPS7A         | COP9 signalosome subunit 7A                                                      | Downregulated |
| A_19_P003 | 0.001978 | 0.000294 | -1.18 | NEAT1          | nuclear paraspeckle assembly transcript 1 (non-protein coding)                   | Downregulated |
| A_32_P182 | 0.001977 | 0.000294 | -1.18 | TALDO1         | transaldolase 1                                                                  | Downregulated |
| A_33_P323 | 0.002027 | 0.000308 | -1.18 | IL24           | interleukin 24                                                                   | Downregulated |
| A_23_P103 | 0.0021   | 0.000326 | -1.18 | YWHAH          | tyrosine 3-monooxygenase/tryptophan 5-monooxygenase activation protein 1         | Downregulated |
| A_23_P147 | 0.002112 | 0.00033  | -1.18 | ATXN2L         | ataxin 2-like                                                                    | Downregulated |

|           |          |          |       |                |                                                                              |               |
|-----------|----------|----------|-------|----------------|------------------------------------------------------------------------------|---------------|
| A_24_P355 | 0.002132 | 0.000338 | -1.18 | FLI1           | Fli-1 proto-oncogene, ETS transcription factor                               | Downregulated |
| A_33_P340 | 0.00218  | 0.000349 | -1.18 | TMEM19         | transmembrane protein 19                                                     | Downregulated |
| A_23_P368 | 0.00226  | 0.00037  | -1.18 | FCHSD2         | FCH and double SH3 domains 2                                                 | Downregulated |
| A_23_P647 | 0.003041 | 0.000581 | -1.18 | AAAS           | achalasia, adrenocortical insufficiency, alacrimia                           | Downregulated |
| A_32_P117 | 0.003232 | 0.000639 | -1.18 | LYSMD4         | LysM, putative peptidoglycan-binding, domain containing 4                    | Downregulated |
| A_23_P515 | 0.003365 | 0.000678 | -1.18 | DUSP12         | dual specificity phosphatase 12                                              | Downregulated |
| A_33_P323 | 0.003983 | 0.000867 | -1.18 | BOLA2B         | bolA family member 2B                                                        | Downregulated |
| A_23_P117 | 0.004406 | 0.00101  | -1.18 | GZMB           | granzyme B (granzyme 2, cytotoxic T-lymphocyte-associated serine esterase 2) | Downregulated |
| A_23_P202 | 0.004628 | 0.00109  | -1.18 | ZNF22          | zinc finger protein 22                                                       | Downregulated |
| A_23_P252 | 0.004859 | 0.00116  | -1.18 | RECQL          | RecQ helicase-like                                                           | Downregulated |
| A_23_P348 | 0.005553 | 0.00141  | -1.18 | MKL1           | megakaryoblastic leukemia (translocation) 1                                  | Downregulated |
| A_21_P000 | 0.007949 | 0.00234  | -1.18 | lnc-CLN8-1     | lnc-CLN8-1:1                                                                 | Downregulated |
| A_22_P000 | 0.008048 | 0.00238  | -1.18 | lnc-TRAPPC8    | lnc-TRAPPC8-2:1                                                              | Downregulated |
| A_21_P001 | 0.009184 | 0.00285  | -1.18 | lnc-FOXA2-1    | lnc-FOXA2-1:3                                                                | Downregulated |
| A_33_P336 | 0.019522 | 0.00755  | -1.18 | BLNK           | B-cell linker                                                                | Downregulated |
| A_22_P000 | 0.022447 | 0.00896  | -1.18 | LOC1027233     | uncharacterized LOC102723373                                                 | Downregulated |
| A_19_P003 | 0.025432 | 0.0105   | -1.18 | LOC389602      | uncharacterized LOC389602                                                    | Downregulated |
| A_24_P193 | 0.026142 | 0.0109   | -1.18 | CCNF           | cyclin F                                                                     | Downregulated |
| A_21_P000 | 0.029405 | 0.0126   | -1.18 | lnc-CYB5D2-1   | lnc-CYB5D2-1:2                                                               | Downregulated |
| A_23_P111 | 0.044789 | 0.021    | -1.18 | ZBTB12         | zinc finger and BTB domain containing 12                                     | Downregulated |
| A_33_P333 | 0.063022 | 0.0317   | -1.18 | TAF4B          | TAF4b RNA polymerase II, TATA box binding protein (TBP)-associated factor 4B | Downregulated |
| A_23_P111 | 0.072689 | 0.0375   | -1.18 | ZSCAN21        | zinc finger and SCAN domain containing 21                                    | Downregulated |
| A_23_P165 | 0.001787 | 0.000246 | -1.19 | STRN           | striatin, calmodulin binding protein                                         | Downregulated |
| A_23_P257 | 0.001805 | 0.00025  | -1.19 | HERC1          | HECT and RLD domain containing E3 ubiquitin protein ligase family member 1   | Downregulated |
| A_23_P104 | 0.001956 | 0.000288 | -1.19 | BPNT1          | 3'(2'), 5'-bisphosphate nucleotidase 1                                       | Downregulated |
| A_23_P350 | 0.001965 | 0.000292 | -1.19 | PRDM1          | PR domain containing 1, with ZNF domain                                      | Downregulated |
| A_33_P337 | 0.00198  | 0.000295 | -1.19 | HMGXB3         | HMG box domain containing 3                                                  | Downregulated |
| A_23_P399 | 0.002006 | 0.000302 | -1.19 | TMEM256        | transmembrane protein 256                                                    | Downregulated |
| A_32_P101 | 0.002023 | 0.000307 | -1.19 | FAM3C          | family with sequence similarity 3, member C                                  | Downregulated |
| A_33_P321 | 0.002033 | 0.00031  | -1.19 | SMNDC1         | survival motor neuron domain containing 1                                    | Downregulated |
| A_33_P336 | 0.002099 | 0.000326 | -1.19 | lnc-TBC1D29    | lnc-TBC1D29-1:1                                                              | Downregulated |
| A_23_P377 | 0.002124 | 0.000335 | -1.19 | ACTR2          | ARP2 actin-related protein 2 homolog (yeast)                                 | Downregulated |
| A_33_P340 | 0.002389 | 0.0004   | -1.19 | LOC1001293     | uncharacterized LOC100129399                                                 | Downregulated |
| A_21_P001 | 0.002575 | 0.000451 | -1.19 | XLOC_I2_008140 |                                                                              | Downregulated |
| A_23_P104 | 0.003223 | 0.000636 | -1.19 | DDIT4          | DNA-damage-inducible transcript 4                                            | Downregulated |
| A_33_P337 | 0.003527 | 0.000725 | -1.19 | ALDH1A1        | aldehyde dehydrogenase 1 family, member A1                                   | Downregulated |
| A_33_P323 | 0.004182 | 0.000932 | -1.19 | DDX18          | DEAD (Asp-Glu-Ala-Asp) box polypeptide 18                                    | Downregulated |



|           |          |          |       |                |                                                             |               |
|-----------|----------|----------|-------|----------------|-------------------------------------------------------------|---------------|
| A_24_P210 | 0.004205 | 0.00094  | -1.19 | BTBD7          | BTB (POZ) domain containing 7                               | Downregulated |
| A_19_P008 | 0.004269 | 0.000963 | -1.19 | HIGD1A         | HIG1 hypoxia inducible domain family, member 1A             | Downregulated |
| A_22_P000 | 0.00431  | 0.000977 | -1.19 | lnc-AC105020   | lnc-AC105020.1-1:1                                          | Downregulated |
| A_23_P309 | 0.004347 | 0.000991 | -1.19 | HECTD4         | HECT domain containing E3 ubiquitin protein ligase 4        | Downregulated |
| A_23_P141 | 0.005457 | 0.00138  | -1.19 | DRG2           | developmentally regulated GTP binding protein 2             | Downregulated |
| A_33_P337 | 0.005554 | 0.00142  | -1.19 | PYROXD1        | pyridine nucleotide-disulphide oxidoreductase domain 1      | Downregulated |
| A_23_P307 | 0.006841 | 0.0019   | -1.19 | CEP95          | centrosomal protein 95kDa                                   | Downregulated |
| A_23_P142 | 0.007455 | 0.00215  | -1.19 | LMAN2L         | lectin, mannose-binding 2-like                              | Downregulated |
| A_22_P000 | 0.007941 | 0.00234  | -1.19 | lnc-HRH4-9     | lnc-HRH4-9:1                                                | Downregulated |
| A_33_P331 | 0.012389 | 0.00422  | -1.19 | ZNF419         | zinc finger protein 419                                     | Downregulated |
| A_33_P336 | 0.013004 | 0.00449  | -1.19 | PDHB           | pyruvate dehydrogenase (lipoamide) beta                     | Downregulated |
| A_21_P000 | 0.013768 | 0.00483  | -1.19 | lnc-SUMF2-1    | lnc-SUMF2-1:1                                               | Downregulated |
| A_23_P851 | 0.016281 | 0.00602  | -1.19 | EMD            | emerin                                                      | Downregulated |
| A_23_P319 | 0.016575 | 0.00616  | -1.19 | UHRF1BP1L      | UHRF1 binding protein 1-like                                | Downregulated |
| A_33_P729 | 0.017296 | 0.0065   | -1.19 | LOC1019269     | uncharacterized LOC101926943                                | Downregulated |
| A_23_P118 | 0.025191 | 0.0104   | -1.19 | LRRC36         | leucine rich repeat containing 36                           | Downregulated |
| A_21_P001 | 0.029816 | 0.0128   | -1.19 | XLOC_I2_009790 |                                                             | Downregulated |
| A_23_P378 | 0.034214 | 0.0152   | -1.19 | IKZF4          | IKAROS family zinc finger 4 (Eos)                           | Downregulated |
| A_32_P148 | 0.035227 | 0.0157   | -1.19 | UBXN2B         | UBX domain protein 2B                                       | Downregulated |
| A_33_P333 | 0.036536 | 0.0164   | -1.19 | USP17L7        | ubiquitin specific peptidase 17-like family member 7        | Downregulated |
| A_21_P000 | 0.044157 | 0.0207   | -1.19 | PSMD6-AS2      | PSMD6 antisense RNA 2                                       | Downregulated |
| A_24_P810 | 0.048872 | 0.0234   | -1.19 | ANO9           | anoctamin 9                                                 | Downregulated |
| A_33_P321 | 0.076165 | 0.0397   | -1.19 | ATP7A          | ATPase, Cu <sup>++</sup> transporting, alpha polypeptide    | Downregulated |
| A_33_P366 | 0.084486 | 0.045    | -1.19 | LINC00954      | long intergenic non-protein coding RNA 954                  | Downregulated |
| A_33_P323 | 0.001594 | 0.0002   | -1.2  | CAPZB          | capping protein (actin filament) muscle Z-line, beta        | Downregulated |
| A_23_P380 | 0.001626 | 0.000208 | -1.2  | LMO4           | LIM domain only 4                                           | Downregulated |
| A_32_P534 | 0.001657 | 0.000215 | -1.2  | BOLA2B         | bolA family member 2B                                       | Downregulated |
| A_23_P156 | 0.001683 | 0.00022  | -1.2  | ANKS1A         | ankyrin repeat and sterile alpha motif domain containing 1A | Downregulated |
| A_24_P194 | 0.001744 | 0.000235 | -1.2  | SAE1           | SUMO1 activating enzyme subunit 1                           | Downregulated |
| A_23_P143 | 0.001808 | 0.000251 | -1.2  | ACIN1          | apoptotic chromatin condensation inducer 1                  | Downregulated |
| A_24_P123 | 0.001958 | 0.000289 | -1.2  | PPAT           | phosphoribosyl pyrophosphate amidotransferase               | Downregulated |
| A_33_P325 | 0.001986 | 0.000297 | -1.2  | WDR55          | WD repeat domain 55                                         | Downregulated |
| A_24_P252 | 0.002027 | 0.000308 | -1.2  | BTN3A2         | butyrophilin, subfamily 3, member A2                        | Downregulated |
| A_33_P323 | 0.002171 | 0.000347 | -1.2  | CBR4           | carbonyl reductase 4                                        | Downregulated |
| A_23_P454 | 0.002382 | 0.000399 | -1.2  | GDI1           | GDP dissociation inhibitor 1                                | Downregulated |
| A_23_P371 | 0.002493 | 0.000427 | -1.2  | TAS2R43        | taste receptor, type 2, member 43                           | Downregulated |
| A_23_P424 | 0.002746 | 0.000496 | -1.2  | POU2F1         | POU class 2 homeobox 1                                      | Downregulated |

|           |          |          |       |                |                                                                           |               |
|-----------|----------|----------|-------|----------------|---------------------------------------------------------------------------|---------------|
| A_23_P211 | 0.002811 | 0.000514 | -1.2  | LAMTOR1        | late endosomal/lysosomal adaptor, MAPK and MTOR activator 1               | Downregulated |
| A_23_P121 | 0.002825 | 0.000517 | -1.2  | HACL1          | 2-hydroxyacyl-CoA lyase 1                                                 | Downregulated |
| A_22_P000 | 0.002951 | 0.000553 | -1.2  | lnc-CHRNA5-    | lnc-CHRNA5-1:1                                                            | Downregulated |
| A_21_P000 | 0.003335 | 0.00067  | -1.2  | GCFC2          | GC-rich sequence DNA-binding factor 2                                     | Downregulated |
| A_23_P895 | 0.004102 | 0.000905 | -1.2  | NLRP1          | NLR family, pyrin domain containing 1                                     | Downregulated |
| A_21_P000 | 0.005358 | 0.00135  | -1.2  | LOC1005066     | hepatocellular carcinoma-associated antigen HCA25a                        | Downregulated |
| A_23_P329 | 0.008735 | 0.00267  | -1.2  | COG7           | component of oligomeric golgi complex 7                                   | Downregulated |
| A_23_P819 | 0.010546 | 0.00342  | -1.2  | HSD17B8        | hydroxysteroid (17-beta) dehydrogenase 8                                  | Downregulated |
| A_33_P323 | 0.011808 | 0.00397  | -1.2  | MPRIP          | myosin phosphatase Rho interacting protein                                | Downregulated |
| A_24_P267 | 0.01239  | 0.00422  | -1.2  | SAMHD1         | SAM domain and HD domain 1                                                | Downregulated |
| A_23_P149 | 0.013312 | 0.00463  | -1.2  | MBTPS1         | membrane-bound transcription factor peptidase, site 1                     | Downregulated |
| A_23_P135 | 0.017199 | 0.00646  | -1.2  | TLE1           | transducin-like enhancer of split 1 (E(sp1) homolog, Drosophila)          | Downregulated |
| A_33_P326 | 0.018895 | 0.00725  | -1.2  | NAA16          | N(alpha)-acetyltransferase 16, NatA auxiliary subunit                     | Downregulated |
| A_33_P321 | 0.018895 | 0.00725  | -1.2  | NMNAT1         | nicotinamide nucleotide adenyltransferase 1                               | Downregulated |
| A_19_P003 | 0.023836 | 0.00968  | -1.2  | L3MBTL1        | l(3)mbt-like 1 (Drosophila)                                               | Downregulated |
| A_21_P000 | 0.024412 | 0.00999  | -1.2  | lnc-RP11-100   | lnc-RP11-1007G5.2.1-2:1                                                   | Downregulated |
| A_23_P205 | 0.024412 | 0.00999  | -1.2  | PPIP5K1        | diphosphoinositol pentakisphosphate kinase 1                              | Downregulated |
| A_21_P001 | 0.029966 | 0.0129   | -1.2  | XLOC_I2_001592 |                                                                           | Downregulated |
| A_33_P324 | 0.05004  | 0.024    | -1.2  | OBP2B          | odorant binding protein 2B                                                | Downregulated |
| A_23_P700 | 0.001597 | 0.000201 | -1.21 | CD74           | CD74 molecule, major histocompatibility complex, class II invariant chain | Downregulated |
| A_24_P124 | 0.001606 | 0.000203 | -1.21 | PSMA4          | proteasome (prosome, macropain) subunit, alpha type, 4                    | Downregulated |
| A_23_P978 | 0.001663 | 0.000216 | -1.21 | LDB1           | LIM domain binding 1                                                      | Downregulated |
| A_33_P322 | 0.001808 | 0.000251 | -1.21 | XPO5           | exportin 5                                                                | Downregulated |
| A_23_P209 | 0.00193  | 0.000281 | -1.21 | PER2           | period circadian clock 2                                                  | Downregulated |
| A_23_P251 | 0.001941 | 0.000283 | -1.21 | CPEB4          | cytoplasmic polyadenylation element binding protein 4                     | Downregulated |
| A_33_P321 | 0.001978 | 0.000295 | -1.21 | DICER1         | dicer 1, ribonuclease type III                                            | Downregulated |
| A_22_P000 | 0.002114 | 0.000331 | -1.21 | PLAC4          | placenta-specific 4                                                       | Downregulated |
| A_23_P605 | 0.002124 | 0.000335 | -1.21 | TOR2A          | torsin family 2, member A                                                 | Downregulated |
| A_19_P003 | 0.002158 | 0.000343 | -1.21 | ZNF254         | zinc finger protein 254                                                   | Downregulated |
| A_23_P138 | 0.002235 | 0.000363 | -1.21 | MLF2           | myeloid leukemia factor 2                                                 | Downregulated |
| A_33_P333 | 0.002303 | 0.000379 | -1.21 | ARSD           | arylsulfatase D                                                           | Downregulated |
| A_23_P115 | 0.002343 | 0.000389 | -1.21 | HNRNPH3        | heterogeneous nuclear ribonucleoprotein H3 (2H9)                          | Downregulated |
| A_22_P000 | 0.0025   | 0.00043  | -1.21 | lnc-FAM78A-3   | lnc-FAM78A-3:1                                                            | Downregulated |
| A_24_P176 | 0.002681 | 0.000477 | -1.21 | ATMIN          | ATM interactor                                                            | Downregulated |
| A_23_P251 | 0.002707 | 0.000485 | -1.21 | ABCF1          | ATP-binding cassette, sub-family F (GCN20), member 1                      | Downregulated |
| A_24_P331 | 0.003421 | 0.000694 | -1.21 | COMMD4         | COMM domain containing 4                                                  | Downregulated |
| A_33_P371 | 0.003542 | 0.000731 | -1.21 | LOC283737      | uncharacterized LOC283737                                                 | Downregulated |

|           |          |          |       |                |                                                                           |               |
|-----------|----------|----------|-------|----------------|---------------------------------------------------------------------------|---------------|
| A_22_P000 | 0.005296 | 0.00132  | -1.21 | lnc-RGMA-1     | lnc-RGMA-1:1                                                              | Downregulated |
| A_33_P380 | 0.005296 | 0.00132  | -1.21 | RYR3           | ryanodine receptor 3                                                      | Downregulated |
| A_23_P877 | 0.005589 | 0.00143  | -1.21 | PLBD1          | phospholipase B domain containing 1                                       | Downregulated |
| A_24_P103 | 0.006176 | 0.00165  | -1.21 | IDI1           | isopentenyl-diphosphate delta isomerase 1                                 | Downregulated |
| A_32_P439 | 0.006315 | 0.0017   | -1.21 | DNAH17         | dynein, axonemal, heavy chain 17                                          | Downregulated |
| A_22_P000 | 0.009618 | 0.00303  | -1.21 | USP12-AS1      | USP12 antisense RNA 1                                                     | Downregulated |
| A_22_P000 | 0.012113 | 0.0041   | -1.21 | ZNRD1-AS1      | ZNRD1 antisense RNA 1                                                     | Downregulated |
| A_32_P129 | 0.012964 | 0.00447  | -1.21 | NHLRC3         | NHL repeat containing 3                                                   | Downregulated |
| A_21_P000 | 0.014122 | 0.005    | -1.21 | LOC1027253     | uncharacterized LOC102725333                                              | Downregulated |
| A_22_P000 | 0.017124 | 0.00642  | -1.21 | LINC00927      | long intergenic non-protein coding RNA 927                                | Downregulated |
| A_23_P312 | 0.020523 | 0.00802  | -1.21 | DNAJC4         | DnaJ (Hsp40) homolog, subfamily C, member 4                               | Downregulated |
| A_23_P205 | 0.021012 | 0.00825  | -1.21 | WDR20          | WD repeat domain 20                                                       | Downregulated |
| A_21_P001 | 0.035165 | 0.0157   | -1.21 | XLOC_I2_006794 |                                                                           | Downregulated |
| A_24_P185 | 0.035408 | 0.0158   | -1.21 | TP53I13        | tumor protein p53 inducible protein 13                                    | Downregulated |
| A_23_P373 | 0.038    | 0.0173   | -1.21 | CCDC85C        | coiled-coil domain containing 85C                                         | Downregulated |
| A_23_P104 | 0.05204  | 0.0252   | -1.21 | MYPN           | myopalladin                                                               | Downregulated |
| A_21_P000 | 0.06947  | 0.0355   | -1.21 | SNORD18C       | small nucleolar RNA, C/D box 18C                                          | Downregulated |
| A_23_P209 | 0.00163  | 0.000209 | -1.22 | ROCK2          | Rho-associated, coiled-coil containing protein kinase 2                   | Downregulated |
| A_22_P000 | 0.001754 | 0.000238 | -1.22 | lnc-PMM2-6     | lnc-PMM2-6:1                                                              | Downregulated |
| A_33_P366 | 0.001826 | 0.000256 | -1.22 | LOC644656      | uncharacterized LOC644656                                                 | Downregulated |
| A_33_P326 | 0.001934 | 0.000282 | -1.22 | TCEANC2        | transcription elongation factor A (SII) N-terminal and central domain con | Downregulated |
| A_33_P331 | 0.001979 | 0.000295 | -1.22 | KDM4B          | lysine (K)-specific demethylase 4B                                        | Downregulated |
| A_22_P000 | 0.002018 | 0.000305 | -1.22 | lnc-C11orf1-1  | lnc-C11orf1-1:1                                                           | Downregulated |
| A_33_P339 | 0.002033 | 0.00031  | -1.22 | KMT2A          | lysine (K)-specific methyltransferase 2A                                  | Downregulated |
| A_23_P480 | 0.002062 | 0.000317 | -1.22 | NUP37          | nucleoporin 37kDa                                                         | Downregulated |
| A_24_P371 | 0.002062 | 0.000318 | -1.22 | MRPL36         | mitochondrial ribosomal protein L36                                       | Downregulated |
| A_23_P210 | 0.002117 | 0.000332 | -1.22 | PTPN18         | protein tyrosine phosphatase, non-receptor type 18 (brain-derived)        | Downregulated |
| A_32_P577 | 0.002479 | 0.000423 | -1.22 | PMS2P1         | postmeiotic segregation increased 2 pseudogene 1                          | Downregulated |
| A_33_P333 | 0.002719 | 0.000488 | -1.22 | DUSP11         | dual specificity phosphatase 11 (RNA/RNP complex 1-interacting)           | Downregulated |
| A_21_P000 | 0.002718 | 0.000488 | -1.22 | lnc-LYZL1-2    | lnc-LYZL1-2:1                                                             | Downregulated |
| A_24_P122 | 0.003003 | 0.000569 | -1.22 | PSMF1          | proteasome (prosome, macropain) inhibitor subunit 1 (PI31)                | Downregulated |
| A_33_P321 | 0.003733 | 0.00079  | -1.22 | NBPF9          | neuroblastoma breakpoint family, member 9                                 | Downregulated |
| A_24_P919 | 0.004147 | 0.000919 | -1.22 | ATPAF1         | ATP synthase mitochondrial F1 complex assembly factor 1                   | Downregulated |
| A_22_P000 | 0.004744 | 0.00112  | -1.22 | SLC25A25-A:    | SLC25A25 antisense RNA 1                                                  | Downregulated |
| A_32_P130 | 0.00603  | 0.00159  | -1.22 | SLC16A7        | solute carrier family 16 (monocarboxylate transporter), member 7          | Downregulated |
| A_24_P596 | 0.007158 | 0.00203  | -1.22 | JAK3           | Janus kinase 3                                                            | Downregulated |
| A_23_P469 | 0.007949 | 0.00234  | -1.22 | MMS19          | MMS19 nucleotide excision repair homolog (S. cerevisiae)                  | Downregulated |

|           |          |          |       |               |                                                                         |               |
|-----------|----------|----------|-------|---------------|-------------------------------------------------------------------------|---------------|
| A_24_P909 | 0.008594 | 0.00261  | -1.22 | HNRNPDL       | heterogeneous nuclear ribonucleoprotein D-like                          | Downregulated |
| A_21_P000 | 0.009992 | 0.00319  | -1.22 | LOC1019276    | uncharacterized LOC101927694                                            | Downregulated |
| A_32_P910 | 0.013354 | 0.00465  | -1.22 | LOC1001290    | uncharacterized LOC100129034                                            | Downregulated |
| A_24_P940 | 0.015403 | 0.0056   | -1.22 | CCDC57        | coiled-coil domain containing 57                                        | Downregulated |
| A_32_P416 | 0.02096  | 0.00822  | -1.22 | NLRC5         | NLR family, CARD domain containing 5                                    | Downregulated |
| A_21_P000 | 0.026644 | 0.0111   | -1.22 | LRRC34        | leucine rich repeat containing 34                                       | Downregulated |
| A_33_P333 | 0.031215 | 0.0135   | -1.22 | SH3YL1        | SH3 and SYLF domain containing 1                                        | Downregulated |
| A_21_P000 | 0.075743 | 0.0394   | -1.22 | lnc-IRF2BPL-1 | lnc-IRF2BPL-2:1                                                         | Downregulated |
| A_32_P357 | 0.078204 | 0.0409   | -1.22 | PPHLN1        | periphilin 1                                                            | Downregulated |
| A_22_P000 | 0.087386 | 0.0471   | -1.22 | lnc-FAM63B-1  | lnc-FAM63B-1:1                                                          | Downregulated |
| A_24_P798 | 0.001576 | 0.000197 | -1.23 | PBXIP1        | pre-B-cell leukemia homeobox interacting protein 1                      | Downregulated |
| A_23_P345 | 0.002046 | 0.000313 | -1.23 | ZNF655        | zinc finger protein 655                                                 | Downregulated |
| A_23_P968 | 0.002086 | 0.000323 | -1.23 | FAF1          | Fas (TNFRSF6) associated factor 1                                       | Downregulated |
| A_23_P349 | 0.002173 | 0.000348 | -1.23 | JTB           | jumping translocation breakpoint                                        | Downregulated |
| A_23_P139 | 0.002184 | 0.00035  | -1.23 | ERGIC2        | ERGIC and golgi 2                                                       | Downregulated |
| A_33_P324 | 0.002365 | 0.000395 | -1.23 | SLC41A3       | solute carrier family 41, member 3                                      | Downregulated |
| A_23_P390 | 0.002503 | 0.000431 | -1.23 | RRAS          | related RAS viral (r-ras) oncogene homolog                              | Downregulated |
| A_23_P320 | 0.003199 | 0.00063  | -1.23 | ZNF827        | zinc finger protein 827                                                 | Downregulated |
| A_23_P217 | 0.003265 | 0.000648 | -1.23 | AK6           | adenylate kinase 6                                                      | Downregulated |
| A_23_P245 | 0.006147 | 0.00164  | -1.23 | ACAT1         | acetyl-CoA acetyltransferase 1                                          | Downregulated |
| A_33_P325 | 0.00706  | 0.00199  | -1.23 | MFSD1         | major facilitator superfamily domain containing 1                       | Downregulated |
| A_23_P127 | 0.00751  | 0.00217  | -1.23 | PPRC1         | peroxisome proliferator-activated receptor gamma, coactivator-related 1 | Downregulated |
| A_33_P341 | 0.011128 | 0.00366  | -1.23 | BTBD7         | BTB (POZ) domain containing 7                                           | Downregulated |
| A_22_P000 | 0.011362 | 0.00377  | -1.23 | LOC284648     | uncharacterized LOC284648                                               | Downregulated |
| A_33_P326 | 0.01517  | 0.0055   | -1.23 | LOC1027247    | tricarboxylate transport protein, mitochondrial-like                    | Downregulated |
| A_22_P000 | 0.016063 | 0.00591  | -1.23 | lnc-ADAMTS7   | lnc-ADAMTS7-1:3                                                         | Downregulated |
| A_23_P244 | 0.023072 | 0.00927  | -1.23 | CTSF          | cathepsin F                                                             | Downregulated |
| A_23_P258 | 0.024838 | 0.0102   | -1.23 | ENOX2         | ecto-NOX disulfide-thiol exchanger 2                                    | Downregulated |
| A_21_P000 | 0.024825 | 0.0102   | -1.23 | lnc-PDE4D-1   | lnc-PDE4D-1:1                                                           | Downregulated |
| A_33_P321 | 0.02969  | 0.0127   | -1.23 | AGPAT5        | 1-acylglycerol-3-phosphate O-acyltransferase 5                          | Downregulated |
| A_21_P000 | 0.03179  | 0.0138   | -1.23 | lnc-WRNIP1-2  | lnc-WRNIP1-2:20                                                         | Downregulated |
| A_23_P106 | 0.044848 | 0.0211   | -1.23 | CHST6         | carbohydrate (N-acetylglucosamine 6-O) sulfotransferase 6               | Downregulated |
| A_24_P931 | 0.057031 | 0.0281   | -1.23 | LOC1001288    | ACA3104                                                                 | Downregulated |
| A_21_P001 | 0.064522 | 0.0325   | -1.23 | LOC388692     | uncharacterized LOC388692                                               | Downregulated |
| A_23_P333 | 0.07196  | 0.0371   | -1.23 | SH3D19        | SH3 domain containing 19                                                | Downregulated |
| A_23_P425 | 0.072642 | 0.0375   | -1.23 | SPDYE1        | speedy/RINGO cell cycle regulator family member E1                      | Downregulated |
| A_21_P000 | 0.001606 | 0.000203 | -1.24 | SNORA70E      | small nucleolar RNA, H/ACA box 70E                                      | Downregulated |

|           |          |          |       |             |                                                                        |               |
|-----------|----------|----------|-------|-------------|------------------------------------------------------------------------|---------------|
| A_23_P901 | 0.001611 | 0.000204 | -1.24 | PPP1R15A    | protein phosphatase 1, regulatory subunit 15A                          | Downregulated |
| A_23_P546 | 0.001629 | 0.000209 | -1.24 | ATP6V0D1    | ATPase, H+ transporting, lysosomal 38kDa, V0 subunit d1                | Downregulated |
| A_33_P338 | 0.001633 | 0.00021  | -1.24 | CTDNBP1     | CTD nuclear envelope phosphatase 1                                     | Downregulated |
| A_23_P795 | 0.001635 | 0.00021  | -1.24 | SUCLG1      | succinate-CoA ligase, alpha subunit                                    | Downregulated |
| A_23_P206 | 0.001754 | 0.000238 | -1.24 | ITGAL       | integrin, alpha L (antigen CD11A (p180), lymphocyte function-associate | Downregulated |
| A_24_P361 | 0.001772 | 0.000242 | -1.24 | CHD8        | chromodomain helicase DNA binding protein 8                            | Downregulated |
| A_23_P100 | 0.00186  | 0.000264 | -1.24 | ZNF598      | zinc finger protein 598                                                | Downregulated |
| A_33_P333 | 0.001903 | 0.000274 | -1.24 | FCRL5       | Fc receptor-like 5                                                     | Downregulated |
| A_33_P326 | 0.00193  | 0.000281 | -1.24 | NCBP1       | nuclear cap binding protein subunit 1, 80kDa                           | Downregulated |
| A_23_P122 | 0.001973 | 0.000293 | -1.24 | HDAC2       | histone deacetylase 2                                                  | Downregulated |
| A_23_P140 | 0.002006 | 0.000302 | -1.24 | SUPT20H     | suppressor of Ty 20 homolog (S. cerevisiae)                            | Downregulated |
| A_23_P866 | 0.002125 | 0.000336 | -1.24 | HNRNPA3     | heterogeneous nuclear ribonucleoprotein A3                             | Downregulated |
| A_24_P924 | 0.002558 | 0.000445 | -1.24 | PCNXL3      | pecanex-like 3 (Drosophila)                                            | Downregulated |
| A_23_P132 | 0.002572 | 0.00045  | -1.24 | SPCS3       | signal peptidase complex subunit 3 homolog (S. cerevisiae)             | Downregulated |
| A_23_P101 | 0.002818 | 0.000515 | -1.24 | TMEM38A     | transmembrane protein 38A                                              | Downregulated |
| A_23_P211 | 0.002853 | 0.000525 | -1.24 | NDUFV3      | NADH dehydrogenase (ubiquinone) flavoprotein 3, 10kDa                  | Downregulated |
| A_23_P942 | 0.003338 | 0.000671 | -1.24 | OXR1        | oxidation resistance 1                                                 | Downregulated |
| A_33_P342 | 0.005267 | 0.00131  | -1.24 | LOC1027251  | uncharacterized LOC102725171                                           | Downregulated |
| A_24_P942 | 0.005372 | 0.00135  | -1.24 | TRAPPC6B    | trafficking protein particle complex 6B                                | Downregulated |
| A_23_P140 | 0.00638  | 0.00173  | -1.24 | DDX19B      | DEAD (Asp-Glu-Ala-Asp) box polypeptide 19B                             | Downregulated |
| A_33_P360 | 0.006443 | 0.00176  | -1.24 | C12orf80    | chromosome 12 open reading frame 80                                    | Downregulated |
| A_33_P322 | 0.006923 | 0.00194  | -1.24 | LOC1720     | dihydrofolate reductase pseudogene                                     | Downregulated |
| A_22_P000 | 0.007511 | 0.00217  | -1.24 | lnc-POU5F1B | lnc-POU5F1B-3:3                                                        | Downregulated |
| A_33_P332 | 0.008765 | 0.00268  | -1.24 | FAM69A      | family with sequence similarity 69, member A                           | Downregulated |
| A_21_P000 | 0.00896  | 0.00276  | -1.24 | PDCL3       | phosducin-like 3                                                       | Downregulated |
| A_22_P000 | 0.015038 | 0.00544  | -1.24 | lnc-SNURF-1 | lnc-SNURF-1:9                                                          | Downregulated |
| A_21_P000 | 0.015038 | 0.00544  | -1.24 | SNORD42B    | small nucleolar RNA, C/D box 42B                                       | Downregulated |
| A_24_P337 | 0.025764 | 0.0107   | -1.24 | ANKRA2      | ankyrin repeat, family A (RFXANK-like), 2                              | Downregulated |
| A_21_P001 | 0.033792 | 0.0149   | -1.24 | DNAH17      | dynein, axonemal, heavy chain 17                                       | Downregulated |
| A_22_P000 | 0.038334 | 0.0174   | -1.24 | lnc-TPPP2-1 | lnc-TPPP2-1:2                                                          | Downregulated |
| A_21_P000 | 0.075523 | 0.0393   | -1.24 | lnc-BLID-1  | lnc-BLID-1:18                                                          | Downregulated |
| A_24_P276 | 0.001481 | 0.000177 | -1.25 | FCRLA       | Fc receptor-like A                                                     | Downregulated |
| A_23_P215 | 0.001643 | 0.000212 | -1.25 | ECHDC1      | ethylmalonyl-CoA decarboxylase 1                                       | Downregulated |
| A_24_P126 | 0.001656 | 0.000215 | -1.25 | NR2C2AP     | nuclear receptor 2C2-associated protein                                | Downregulated |
| A_23_P603 | 0.001663 | 0.000217 | -1.25 | C9orf64     | chromosome 9 open reading frame 64                                     | Downregulated |
| A_22_P000 | 0.001763 | 0.00024  | -1.25 | NUP50-AS1   | NUP50 antisense RNA 1 (head to head)                                   | Downregulated |
| A_33_P330 | 0.001772 | 0.000242 | -1.25 | MAP3K11     | mitogen-activated protein kinase kinase kinase 11                      | Downregulated |

|           |          |          |       |                |                                                |               |
|-----------|----------|----------|-------|----------------|------------------------------------------------|---------------|
| A_24_P728 | 0.00193  | 0.000281 | -1.25 | XLOC_I2_011874 |                                                | Downregulated |
| A_22_P000 | 0.001949 | 0.000286 | -1.25 | lnc-LRRC14-1   | lnc-LRRC14-1:1                                 | Downregulated |
| A_23_P212 | 0.002041 | 0.000312 | -1.25 | THUMPD3        | THUMP domain containing 3                      | Downregulated |
| A_33_P322 | 0.002072 | 0.00032  | -1.25 | C9orf64        | chromosome 9 open reading frame 64             | Downregulated |
| A_23_P703 | 0.002168 | 0.000346 | -1.25 | PHF3           | PHD finger protein 3                           | Downregulated |
| A_23_P152 | 0.002391 | 0.000402 | -1.25 | C17orf59       | chromosome 17 open reading frame 59            | Downregulated |
| A_23_P946 | 0.002538 | 0.00044  | -1.25 | TBC1D13        | TBC1 domain family, member 13                  | Downregulated |
| A_23_P155 | 0.003358 | 0.000676 | -1.25 | XYLT2          | xylosyltransferase II                          | Downregulated |
| A_22_P000 | 0.003469 | 0.000708 | -1.25 | CRTC3-AS1      | CRTC3 antisense RNA 1                          | Downregulated |
| A_24_P381 | 0.004156 | 0.000923 | -1.25 | SYVN1          | synovial apoptosis inhibitor 1, synoviolin     | Downregulated |
| A_21_P000 | 0.004321 | 0.000981 | -1.25 | SNORD36A       | small nucleolar RNA, C/D box 36A               | Downregulated |
| A_33_P322 | 0.006058 | 0.0016   | -1.25 | C17orf50       | chromosome 17 open reading frame 50            | Downregulated |
| A_33_P324 | 0.006593 | 0.00181  | -1.25 | CEP350         | centrosomal protein 350kDa                     | Downregulated |
| A_33_P364 | 0.006791 | 0.00189  | -1.25 | LOC1002893     | uncharacterized LOC100289333                   | Downregulated |
| A_23_P133 | 0.006797 | 0.00189  | -1.25 | TBCK           | TBC1 domain containing kinase                  | Downregulated |
| A_33_P329 | 0.007192 | 0.00205  | -1.25 | LRRC37A3       | leucine rich repeat containing 37, member A3   | Downregulated |
| A_22_P000 | 0.009487 | 0.00297  | -1.25 | lnc-SEBOX-1    | lnc-SEBOX-1:1                                  | Downregulated |
| A_24_P132 | 0.009487 | 0.00297  | -1.25 | RNF14          | ring finger protein 14                         | Downregulated |
| A_21_P000 | 0.015464 | 0.00563  | -1.25 | lnc-KATNAL2    | lnc-KATNAL2-1:1                                | Downregulated |
| A_21_P001 | 0.048785 | 0.0233   | -1.25 | LINC00993      | long intergenic non-protein coding RNA 993     | Downregulated |
| A_21_P000 | 0.060547 | 0.0302   | -1.25 | lnc-FUT8-2     | lnc-FUT8-2:2                                   | Downregulated |
| A_24_P144 | 0.077079 | 0.0402   | -1.25 | WFDC2          | WAP four-disulfide core domain 2               | Downregulated |
| A_23_P330 | 0.001453 | 0.00017  | -1.26 | DERL1          | derlin 1                                       | Downregulated |
| A_24_P914 | 0.001626 | 0.000208 | -1.26 | MARK2          | MAP/microtubule affinity-regulating kinase 2   | Downregulated |
| A_23_P127 | 0.001754 | 0.000238 | -1.26 | CTR9           | CTR9, Paf1/RNA polymerase II complex component | Downregulated |
| A_32_P170 | 0.001797 | 0.000248 | -1.26 | SUB1           | SUB1 homolog (S. cerevisiae)                   | Downregulated |
| A_33_P325 | 0.001808 | 0.000251 | -1.26 | LINC01561      | long intergenic non-protein coding RNA 1561    | Downregulated |
| A_33_P333 | 0.00196  | 0.00029  | -1.26 | TMEM208        | transmembrane protein 208                      | Downregulated |
| A_23_P312 | 0.002016 | 0.000305 | -1.26 | PNPLA8         | patatin-like phospholipase domain containing 8 | Downregulated |
| A_23_P253 | 0.002227 | 0.000361 | -1.26 | PNOC           | prepronociceptin                               | Downregulated |
| A_22_P000 | 0.002235 | 0.000363 | -1.26 | lnc-ATP11B-2   | lnc-ATP11B-2:1                                 | Downregulated |
| A_21_P001 | 0.002499 | 0.000429 | -1.26 | FOXN3          | forkhead box N3                                | Downregulated |
| A_23_P310 | 0.002682 | 0.000478 | -1.26 | NUP43          | nucleoporin 43kDa                              | Downregulated |
| A_24_P138 | 0.003331 | 0.000668 | -1.26 | FAM120A        | family with sequence similarity 120A           | Downregulated |
| A_24_P848 | 0.003747 | 0.000794 | -1.26 | LINC00032      | long intergenic non-protein coding RNA 32      | Downregulated |
| A_24_P945 | 0.003747 | 0.000794 | -1.26 | RBM15B         | RNA binding motif protein 15B                  | Downregulated |
| A_23_P376 | 0.004843 | 0.00116  | -1.26 | TICAM1         | toll-like receptor adaptor molecule 1          | Downregulated |

|           |          |          |       |                |                                                            |               |
|-----------|----------|----------|-------|----------------|------------------------------------------------------------|---------------|
| A_33_P342 | 0.005354 | 0.00134  | -1.26 | WHSC1          | Wolf-Hirschhorn syndrome candidate 1                       | Downregulated |
| A_22_P000 | 0.00847  | 0.00256  | -1.26 | lnc-LPGAT1-2   | lnc-LPGAT1-2:1                                             | Downregulated |
| A_22_P000 | 0.008877 | 0.00272  | -1.26 | lnc-IGFALS-1   | lnc-IGFALS-1:1                                             | Downregulated |
| A_32_P146 | 0.009981 | 0.00318  | -1.26 | PDLIM5         | PDZ and LIM domain 5                                       | Downregulated |
| A_22_P000 | 0.010188 | 0.00328  | -1.26 | lnc-C11orf44-  | lnc-C11orf44-2:1                                           | Downregulated |
| A_33_P338 | 0.012906 | 0.00444  | -1.26 | AKAP9          | A kinase (PRKA) anchor protein 9                           | Downregulated |
| A_23_P109 | 0.015033 | 0.00543  | -1.26 | SLC26A6        | solute carrier family 26 (anion exchanger), member 6       | Downregulated |
| A_23_P321 | 0.018829 | 0.00721  | -1.26 | SAAL1          | serum amyloid A-like 1                                     | Downregulated |
| A_21_P000 | 0.019078 | 0.00734  | -1.26 | IQCH-AS1       | IQCH antisense RNA 1                                       | Downregulated |
| A_24_P102 | 0.023517 | 0.00951  | -1.26 | DAPK2          | death-associated protein kinase 2                          | Downregulated |
| A_33_P357 | 0.02857  | 0.0121   | -1.26 | NCR1           | natural cytotoxicity triggering receptor 1                 | Downregulated |
| A_21_P001 | 0.028955 | 0.0123   | -1.26 | lnc-SIK1-4     | lnc-SIK1-4:9                                               | Downregulated |
| A_33_P341 | 0.032982 | 0.0145   | -1.26 | ARHGAP44       | Rho GTPase activating protein 44                           | Downregulated |
| A_33_P322 | 0.03335  | 0.0147   | -1.26 | LIMS3-LOC4     | LIMS3-LOC440895 readthrough                                | Downregulated |
| A_23_P160 | 0.053925 | 0.0263   | -1.26 | GALE           | UDP-galactose-4-epimerase                                  | Downregulated |
| A_21_P000 | 0.070917 | 0.0364   | -1.26 | lnc-DHX37-5    | lnc-DHX37-5:2                                              | Downregulated |
| A_33_P378 | 0.001563 | 0.000194 | -1.27 | PAK1           | p21 protein (Cdc42/Rac)-activated kinase 1                 | Downregulated |
| A_33_P326 | 0.001604 | 0.000202 | -1.27 | DCTN1          | dynactin 1                                                 | Downregulated |
| A_23_P434 | 0.001683 | 0.00022  | -1.27 | CAST           | calpastatin                                                | Downregulated |
| A_23_P877 | 0.001854 | 0.000263 | -1.27 | PARPBP         | PARP1 binding protein                                      | Downregulated |
| A_23_P126 | 0.001949 | 0.000286 | -1.27 | S100A11        | S100 calcium binding protein A11                           | Downregulated |
| A_24_P115 | 0.002043 | 0.000313 | -1.27 | COX15          | cytochrome c oxidase assembly homolog 15 (yeast)           | Downregulated |
| A_21_P000 | 0.002078 | 0.000322 | -1.27 | lnc-HES1-2     | lnc-HES1-2:6                                               | Downregulated |
| A_33_P330 | 0.002356 | 0.000392 | -1.27 | UQCC1          | ubiquinol-cytochrome c reductase complex assembly factor 1 | Downregulated |
| A_23_P214 | 0.003232 | 0.000639 | -1.27 | PHF19          | PHD finger protein 19                                      | Downregulated |
| A_33_P330 | 0.004882 | 0.00117  | -1.27 | TTC23L         | tetratricopeptide repeat domain 23-like                    | Downregulated |
| A_33_P340 | 0.004977 | 0.0012   | -1.27 | PHC3           | polyhomeotic homolog 3 (Drosophila)                        | Downregulated |
| A_33_P334 | 0.005095 | 0.00124  | -1.27 | LOC1019276     | ERV-FRD provirus ancestral Env polyprotein-like            | Downregulated |
| A_33_P328 | 0.008919 | 0.00274  | -1.27 | UHRF1BP1L      | UHRF1 binding protein 1-like                               | Downregulated |
| A_23_P426 | 0.00959  | 0.00302  | -1.27 | ZYG11B         | zyg-11 family member B, cell cycle regulator               | Downregulated |
| A_23_P217 | 0.011865 | 0.004    | -1.27 | EHMT1          | euchromatic histone-lysine N-methyltransferase 1           | Downregulated |
| A_23_P386 | 0.028176 | 0.0119   | -1.27 | GTF2H3         | general transcription factor IIH, polypeptide 3, 34kDa     | Downregulated |
| A_24_P363 | 0.037512 | 0.017    | -1.27 | FTSJ2          | FtsJ RNA methyltransferase homolog 2 (E. coli)             | Downregulated |
| A_33_P324 | 0.037512 | 0.017    | -1.27 | MZF1           | myeloid zinc finger 1                                      | Downregulated |
| A_19_P003 | 0.037512 | 0.017    | -1.27 | XLOC_I2_015561 |                                                            | Downregulated |
| A_24_P392 | 0.053369 | 0.0259   | -1.27 | MYPOP          | Myb-related transcription factor, partner of profilin      | Downregulated |
| A_24_P299 | 0.001403 | 0.00016  | -1.28 | ARPC5L         | actin related protein 2/3 complex, subunit 5-like          | Downregulated |

|           |          |          |       |               |                                                           |               |
|-----------|----------|----------|-------|---------------|-----------------------------------------------------------|---------------|
| A_23_P203 | 0.001422 | 0.000163 | -1.28 | DDX11         | DEAD/H (Asp-Glu-Ala-Asp/His) box helicase 11              | Downregulated |
| A_23_P170 | 0.001433 | 0.000165 | -1.28 | PSMB2         | proteasome (prosome, macropain) subunit, beta type, 2     | Downregulated |
| A_23_P945 | 0.001575 | 0.000196 | -1.28 | ANXA1         | annexin A1                                                | Downregulated |
| A_33_P333 | 0.001618 | 0.000206 | -1.28 | WIPF1         | WAS/WASL interacting protein family, member 1             | Downregulated |
| A_23_P451 | 0.001766 | 0.000241 | -1.28 | PROSC         | proline synthetase co-transcribed homolog (bacterial)     | Downregulated |
| A_23_P945 | 0.001908 | 0.000275 | -1.28 | TMEM141       | transmembrane protein 141                                 | Downregulated |
| A_23_P106 | 0.00206  | 0.000317 | -1.28 | NOB1          | NIN1/RPN12 binding protein 1 homolog (S. cerevisiae)      | Downregulated |
| A_22_P000 | 0.002189 | 0.000351 | -1.28 | lnc-SH2D7-3   | lnc-SH2D7-3:1                                             | Downregulated |
| A_23_P144 | 0.002361 | 0.000394 | -1.28 | GALNT7        | polypeptide N-acetylgalactosaminyltransferase 7           | Downregulated |
| A_33_P333 | 0.002989 | 0.000564 | -1.28 | WASH5P        | WAS protein family homolog 5 pseudogene                   | Downregulated |
| A_33_P681 | 0.005462 | 0.00138  | -1.28 | LOC1005068    | uncharacterized LOC100506844                              | Downregulated |
| A_23_P796 | 0.007222 | 0.00206  | -1.28 | CCDC93        | coiled-coil domain containing 93                          | Downregulated |
| A_22_P000 | 0.008431 | 0.00254  | -1.28 | lnc-LINC0034  | lnc-LINC00346-2:1                                         | Downregulated |
| A_22_P000 | 0.018659 | 0.00713  | -1.28 | ZFPM2-AS1     | ZFPM2 antisense RNA 1                                     | Downregulated |
| A_24_P399 | 0.020052 | 0.0078   | -1.28 | TXNL4B        | thioredoxin-like 4B                                       | Downregulated |
| A_21_P001 | 0.04072  | 0.0187   | -1.28 | NUTM2A-AS1    | NUTM2A antisense RNA 1                                    | Downregulated |
| A_22_P000 | 0.044301 | 0.0207   | -1.28 | lnc-ARMC6-1   | lnc-ARMC6-1:1                                             | Downregulated |
| A_21_P001 | 0.049305 | 0.0236   | -1.28 | lnc-C22orf26- | lnc-C22orf26-2:10                                         | Downregulated |
| A_22_P000 | 0.056721 | 0.0279   | -1.28 | lnc-ZMYM2-4   | lnc-ZMYM2-4:1                                             | Downregulated |
| A_23_P334 | 0.001433 | 0.000165 | -1.29 | ITFG1         | integrin alpha FG-GAP repeat containing 1                 | Downregulated |
| A_23_P165 | 0.00162  | 0.000206 | -1.29 | RFXANK        | regulatory factor X-associated ankyrin-containing protein | Downregulated |
| A_24_P189 | 0.001635 | 0.00021  | -1.29 | LMF1          | lipase maturation factor 1                                | Downregulated |
| A_23_P691 | 0.001719 | 0.00023  | -1.29 | DYNC1L1       | dynein, cytoplasmic 1, light intermediate chain 1         | Downregulated |
| A_33_P323 | 0.001785 | 0.000245 | -1.29 | UTRN          | utrophin                                                  | Downregulated |
| A_33_P321 | 0.001798 | 0.000248 | -1.29 | CS            | citrate synthase                                          | Downregulated |
| A_21_P000 | 0.001842 | 0.00026  | -1.29 | SNORA70B      | small nucleolar RNA, H/ACA box 70B                        | Downregulated |
| A_23_P209 | 0.001871 | 0.000267 | -1.29 | CYP1B1        | cytochrome P450, family 1, subfamily B, polypeptide 1     | Downregulated |
| A_24_P940 | 0.001889 | 0.000271 | -1.29 | CTBS          | chitobiase, di-N-acetyl-                                  | Downregulated |
| A_23_P425 | 0.001951 | 0.000287 | -1.29 | TRIM14        | tripartite motif containing 14                            | Downregulated |
| A_23_P129 | 0.002568 | 0.000447 | -1.29 | C11orf24      | chromosome 11 open reading frame 24                       | Downregulated |
| A_23_P607 | 0.002805 | 0.000512 | -1.29 | ASMTL-AS1     | ASMTL antisense RNA 1                                     | Downregulated |
| A_23_P545 | 0.003392 | 0.000686 | -1.29 | MKL2          | MKL/myocardin-like 2                                      | Downregulated |
| A_33_P322 | 0.003446 | 0.000701 | -1.29 | ALKBH3        | alkB, alkylation repair homolog 3 (E. coli)               | Downregulated |
| A_22_P000 | 0.004079 | 0.000896 | -1.29 | RPARP-AS1     | RPARP antisense RNA 1                                     | Downregulated |
| A_33_P340 | 0.00487  | 0.00117  | -1.29 | GGTLC2        | gamma-glutamyltransferase light chain 2                   | Downregulated |
| A_23_P141 | 0.006915 | 0.00194  | -1.29 | TYK2          | tyrosine kinase 2                                         | Downregulated |
| A_23_P137 | 0.007306 | 0.00209  | -1.29 | TBX19         | T-box 19                                                  | Downregulated |



|           |          |          |       |                |                                                                            |               |
|-----------|----------|----------|-------|----------------|----------------------------------------------------------------------------|---------------|
| A_21_P000 | 0.007491 | 0.00216  | -1.29 | lnc-OIP5-1     | lnc-OIP5-1:1                                                               | Downregulated |
| A_21_P001 | 0.008324 | 0.0025   | -1.29 | lnc-TEX261-2   | lnc-TEX261-2:1                                                             | Downregulated |
| A_24_P397 | 0.008765 | 0.00268  | -1.29 | GCNT2          | glucosaminyl (N-acetyl) transferase 2, I-branching enzyme (I blood group)  | Downregulated |
| A_23_P565 | 0.009793 | 0.0031   | -1.29 | IL37           | interleukin 37                                                             | Downregulated |
| A_21_P001 | 0.012945 | 0.00446  | -1.29 | XLOC_l2_009159 |                                                                            | Downregulated |
| A_23_P918 | 0.01767  | 0.00667  | -1.29 | DCBLD2         | discoidin, CUB and LCCL domain containing 2                                | Downregulated |
| A_21_P000 | 0.030769 | 0.0133   | -1.29 | SCARNA14       | small Cajal body-specific RNA 14                                           | Downregulated |
| A_23_P420 | 0.042335 | 0.0197   | -1.29 | CIT            | citron rho-interacting serine/threonine kinase                             | Downregulated |
| A_21_P000 | 0.045135 | 0.0212   | -1.29 | lnc-FTH1-1     | lnc-FTH1-1:1                                                               | Downregulated |
| A_22_P000 | 0.045135 | 0.0212   | -1.29 | lnc-SLC6A12    | lnc-SLC6A12-4:1                                                            | Downregulated |
| A_23_P687 | 0.047581 | 0.0226   | -1.29 | DNAJC28        | DnaJ (Hsp40) homolog, subfamily C, member 28                               | Downregulated |
| A_33_P332 | 0.075672 | 0.0394   | -1.29 | CAGE1          | cancer antigen 1                                                           | Downregulated |
| A_24_P328 | 0.085795 | 0.0461   | -1.29 | SOCS5          | suppressor of cytokine signaling 5                                         | Downregulated |
| A_23_P145 | 0.001421 | 0.000163 | -1.3  | FUCA2          | fucosidase, alpha-L- 2, plasma                                             | Downregulated |
| A_24_P316 | 0.001429 | 0.000164 | -1.3  | MLLT10         | myeloid/lymphoid or mixed-lineage leukemia (trithorax homolog, Drosophila) | Downregulated |
| A_23_P256 | 0.001802 | 0.000249 | -1.3  | LAS1L          | LAS1-like (S. cerevisiae)                                                  | Downregulated |
| A_22_P000 | 0.001889 | 0.000271 | -1.3  | lnc-PAX9-4     | lnc-PAX9-4:1                                                               | Downregulated |
| A_24_P100 | 0.001906 | 0.000275 | -1.3  | EMC4           | ER membrane protein complex subunit 4                                      | Downregulated |
| A_23_P255 | 0.002101 | 0.000327 | -1.3  | DCAF12         | DDB1 and CUL4 associated factor 12                                         | Downregulated |
| A_23_P317 | 0.002156 | 0.000343 | -1.3  | UIMC1          | ubiquitin interaction motif containing 1                                   | Downregulated |
| A_22_P000 | 0.002472 | 0.000421 | -1.3  | lnc-RPL36AL    | lnc-RPL36AL-1:1                                                            | Downregulated |
| A_33_P384 | 0.002984 | 0.000562 | -1.3  | FHL1           | four and a half LIM domains 1                                              | Downregulated |
| A_22_P000 | 0.002984 | 0.000562 | -1.3  | lnc-GPD2-1     | lnc-GPD2-1:1                                                               | Downregulated |
| A_24_P290 | 0.003219 | 0.000635 | -1.3  | OGDH           | oxoglutarate (alpha-ketoglutarate) dehydrogenase (lipoamide)               | Downregulated |
| A_23_P952 | 0.003228 | 0.000638 | -1.3  | RBKS           | ribokinase                                                                 | Downregulated |
| A_33_P333 | 0.003401 | 0.000689 | -1.3  | UBE2Q2         | ubiquitin-conjugating enzyme E2Q family member 2                           | Downregulated |
| A_33_P383 | 0.00366  | 0.000767 | -1.3  | C19orf24       | chromosome 19 open reading frame 24                                        | Downregulated |
| A_33_P348 | 0.003663 | 0.000768 | -1.3  | SNORA19        | small nucleolar RNA, H/ACA box 19                                          | Downregulated |
| A_33_P323 | 0.003791 | 0.000807 | -1.3  | ITPR2          | inositol 1,4,5-trisphosphate receptor, type 2                              | Downregulated |
| A_21_P000 | 0.004257 | 0.000959 | -1.3  | SNORD1B        | small nucleolar RNA, C/D box 1B                                            | Downregulated |
| A_24_P124 | 0.005096 | 0.00125  | -1.3  | NDNL2          | necdin-like 2                                                              | Downregulated |
| A_23_P499 | 0.005683 | 0.00146  | -1.3  | KRT10          | keratin 10, type I                                                         | Downregulated |
| A_33_P345 | 0.006372 | 0.00173  | -1.3  | LINC01573      | long intergenic non-protein coding RNA 1573                                | Downregulated |
| A_33_P333 | 0.006506 | 0.00178  | -1.3  | ACACB          | acetyl-CoA carboxylase beta                                                | Downregulated |
| A_33_P646 | 0.007927 | 0.00233  | -1.3  | SNHG7          | small nucleolar RNA host gene 7 (non-protein coding)                       | Downregulated |
| A_22_P000 | 0.013405 | 0.00467  | -1.3  | lnc-C1orf31-4  | lnc-C1orf31-4:1                                                            | Downregulated |
| A_22_P000 | 0.01422  | 0.00505  | -1.3  | lnc-CCNB1IP    | lnc-CCNB1IP1-2:1                                                           | Downregulated |

|           |          |          |       |              |                                                                           |               |
|-----------|----------|----------|-------|--------------|---------------------------------------------------------------------------|---------------|
| A_33_P334 | 0.015271 | 0.00555  | -1.3  | ZC3H18       | zinc finger CCCH-type containing 18                                       | Downregulated |
| A_21_P001 | 0.016739 | 0.00624  | -1.3  | lnc-PRC1-1   | lnc-PRC1-1:1                                                              | Downregulated |
| A_21_P000 | 0.052859 | 0.0256   | -1.3  | lnc-DMRTA1-1 | lnc-DMRTA1-5:2                                                            | Downregulated |
| A_33_P333 | 0.065215 | 0.033    | -1.3  | ANKK1        | ankyrin repeat and kinase domain containing 1                             | Downregulated |
| A_24_P204 | 0.001333 | 0.000145 | -1.31 | ANXA2P1      | annexin A2 pseudogene 1                                                   | Downregulated |
| A_32_P220 | 0.001421 | 0.000163 | -1.31 | ZFAND6       | zinc finger, AN1-type domain 6                                            | Downregulated |
| A_23_P104 | 0.001443 | 0.000167 | -1.31 | ITGB1        | integrin, beta 1 (fibronectin receptor, beta polypeptide, antigen CD29 in | Downregulated |
| A_33_P342 | 0.001808 | 0.000251 | -1.31 | CADM1        | cell adhesion molecule 1                                                  | Downregulated |
| A_23_P329 | 0.001936 | 0.000282 | -1.31 | RHBDF2       | rhomoid 5 homolog 2 (Drosophila)                                          | Downregulated |
| A_33_P338 | 0.001948 | 0.000285 | -1.31 | ATP6V1D      | ATPase, H <sup>+</sup> transporting, lysosomal 34kDa, V1 subunit D        | Downregulated |
| A_33_P333 | 0.002114 | 0.000331 | -1.31 | INSR         | insulin receptor                                                          | Downregulated |
| A_21_P000 | 0.002568 | 0.000448 | -1.31 | lnc-AC00310  | lnc-AC003101.1.1-1:1                                                      | Downregulated |
| A_23_P591 | 0.003119 | 0.000604 | -1.31 | LSM2         | LSM2 homolog, U6 small nuclear RNA associated (S. cerevisiae)             | Downregulated |
| A_33_P325 | 0.00321  | 0.000633 | -1.31 | RBM48        | RNA binding motif protein 48                                              | Downregulated |
| A_23_P124 | 0.003315 | 0.000664 | -1.31 | QSOX1        | quiescin Q6 sulfhydryl oxidase 1                                          | Downregulated |
| A_22_P000 | 0.003535 | 0.000729 | -1.31 | lnc-WNT1-2   | lnc-WNT1-2:1                                                              | Downregulated |
| A_23_P141 | 0.004184 | 0.000933 | -1.31 | FBXL20       | F-box and leucine-rich repeat protein 20                                  | Downregulated |
| A_23_P131 | 0.004203 | 0.000939 | -1.31 | PRADC1       | protease-associated domain containing 1                                   | Downregulated |
| A_33_P337 | 0.004529 | 0.00105  | -1.31 | TLE1         | transducin-like enhancer of split 1 (E(sp1) homolog, Drosophila)          | Downregulated |
| A_23_P505 | 0.004627 | 0.00108  | -1.31 | DMPK         | dystrophia myotonica-protein kinase                                       | Downregulated |
| A_22_P000 | 0.004969 | 0.0012   | -1.31 | LOC1001316   | uncharacterized LOC100131655                                              | Downregulated |
| A_33_P362 | 0.005253 | 0.00131  | -1.31 | CDRT8        | CMT1A duplicated region transcript 8                                      | Downregulated |
| A_24_P879 | 0.006235 | 0.00167  | -1.31 | WAC-AS1      | WAC antisense RNA 1 (head to head)                                        | Downregulated |
| A_24_P367 | 0.006645 | 0.00183  | -1.31 | SOCS7        | suppressor of cytokine signaling 7                                        | Downregulated |
| A_33_P340 | 0.006846 | 0.00191  | -1.31 | SEH1L        | SEH1-like (S. cerevisiae)                                                 | Downregulated |
| A_23_P477 | 0.00743  | 0.00214  | -1.31 | FOLR2        | folate receptor 2 (fetal)                                                 | Downregulated |
| A_33_P328 | 0.01771  | 0.00669  | -1.31 | CLDN3        | claudin 3                                                                 | Downregulated |
| A_32_P180 | 0.022311 | 0.00889  | -1.31 | PCYOX1       | prenylcysteine oxidase 1                                                  | Downregulated |
| A_33_P336 | 0.022662 | 0.00907  | -1.31 | ERCC1        | excision repair cross-complementation group 1                             | Downregulated |
| A_21_P001 | 0.025587 | 0.0106   | -1.31 | lnc-CSTB-1   | lnc-CSTB-1:5                                                              | Downregulated |
| A_32_P528 | 0.034462 | 0.0153   | -1.31 | TM7SF3       | transmembrane 7 superfamily member 3                                      | Downregulated |
| A_33_P328 | 0.042642 | 0.0198   | -1.31 | SNHG7        | small nucleolar RNA host gene 7 (non-protein coding)                      | Downregulated |
| A_21_P000 | 0.048955 | 0.0234   | -1.31 | lnc-PELI2-6  | lnc-PELI2-6:1                                                             | Downregulated |
| A_23_P348 | 0.058355 | 0.0289   | -1.31 | CDHR3        | cadherin-related family member 3                                          | Downregulated |
| A_22_P000 | 0.06469  | 0.0327   | -1.31 | lnc-ADAM21-2 | lnc-ADAM21-2:1                                                            | Downregulated |
| A_33_P326 | 0.090474 | 0.0491   | -1.31 | FAAH         | fatty acid amide hydrolase                                                | Downregulated |
| A_19_P003 | 0.001359 | 0.00015  | -1.32 | UBE2E3       | ubiquitin-conjugating enzyme E2E 3                                        | Downregulated |

|           |          |          |       |                |                                                                        |               |
|-----------|----------|----------|-------|----------------|------------------------------------------------------------------------|---------------|
| A_24_P899 | 0.001376 | 0.000153 | -1.32 | NAIF1          | nuclear apoptosis inducing factor 1                                    | Downregulated |
| A_23_P680 | 0.001398 | 0.000158 | -1.32 | STAT4          | signal transducer and activator of transcription 4                     | Downregulated |
| A_33_P376 | 0.00151  | 0.000182 | -1.32 | DCAF4L2        | DDB1 and CUL4 associated factor 4-like 2                               | Downregulated |
| A_23_P102 | 0.00151  | 0.000182 | -1.32 | NFS1           | NFS1 cysteine desulfurase                                              | Downregulated |
| A_33_P322 | 0.00178  | 0.000244 | -1.32 | UTY            | ubiquitously transcribed tetratricopeptide repeat containing, Y-linked | Downregulated |
| A_21_P000 | 0.001812 | 0.000252 | -1.32 | lnc-C15orf2-2  | lnc-C15orf2-2:27                                                       | Downregulated |
| A_23_P146 | 0.001904 | 0.000275 | -1.32 | ZFAND1         | zinc finger, AN1-type domain 1                                         | Downregulated |
| A_23_P110 | 0.002012 | 0.000303 | -1.32 | DUSP1          | dual specificity phosphatase 1                                         | Downregulated |
| A_24_P263 | 0.002229 | 0.000362 | -1.32 | DOCK2          | dedicator of cytokinesis 2                                             | Downregulated |
| A_32_P563 | 0.002389 | 0.0004   | -1.32 | RBMX           | RNA binding motif protein, X-linked                                    | Downregulated |
| A_21_P001 | 0.00247  | 0.000421 | -1.32 | XLOC_I2_013328 |                                                                        | Downregulated |
| A_23_P117 | 0.002738 | 0.000493 | -1.32 | CHRM5          | cholinergic receptor, muscarinic 5                                     | Downregulated |
| A_22_P000 | 0.002909 | 0.000541 | -1.32 | lnc-CBR1-1     | lnc-CBR1-1:1                                                           | Downregulated |
| A_33_P323 | 0.003447 | 0.000702 | -1.32 | FAM122B        | family with sequence similarity 122B                                   | Downregulated |
| A_24_P693 | 0.003531 | 0.000727 | -1.32 | LOC1001909     | uncharacterized LOC100190986                                           | Downregulated |
| A_21_P001 | 0.003572 | 0.000742 | -1.32 | GBP3           | guanylate binding protein 3                                            | Downregulated |
| A_22_P000 | 0.004402 | 0.00101  | -1.32 | lnc-ZMYM3-1    | lnc-ZMYM3-1:1                                                          | Downregulated |
| A_33_P321 | 0.006254 | 0.00168  | -1.32 | HDDC2          | HD domain containing 2                                                 | Downregulated |
| A_21_P000 | 0.007778 | 0.00228  | -1.32 | SNORA70D       | small nucleolar RNA, H/ACA box 70D                                     | Downregulated |
| A_32_P228 | 0.01158  | 0.00388  | -1.32 | PRDM10         | PR domain containing 10                                                | Downregulated |
| A_33_P333 | 0.01221  | 0.00414  | -1.32 | LOC1001282     | uncharacterized LOC100128219                                           | Downregulated |
| A_23_P411 | 0.012756 | 0.00438  | -1.32 | B3GALNT1       | beta-1,3-N-acetylgalactosaminyltransferase 1 (globoside blood group)   | Downregulated |
| A_33_P333 | 0.01675  | 0.00625  | -1.32 | ATXN7L1        | ataxin 7-like 1                                                        | Downregulated |
| A_33_P339 | 0.030972 | 0.0134   | -1.32 | SDHA           | succinate dehydrogenase complex, subunit A, flavoprotein (Fp)          | Downregulated |
| A_23_P202 | 0.039243 | 0.0179   | -1.32 | CYP2R1         | cytochrome P450, family 2, subfamily R, polypeptide 1                  | Downregulated |
| A_21_P000 | 0.049381 | 0.0237   | -1.32 | lnc-SLC2A13    | lnc-SLC2A13-3:2                                                        | Downregulated |
| A_22_P000 | 0.069855 | 0.0358   | -1.32 | lnc-SLC7A6-1   | lnc-SLC7A6-1:1                                                         | Downregulated |
| A_24_P171 | 0.001403 | 0.000159 | -1.33 | RASSF5         | Ras association (RalGDS/AF-6) domain family member 5                   | Downregulated |
| A_23_P129 | 0.001548 | 0.00019  | -1.33 | PLEKHO2        | pleckstrin homology domain containing, family O member 2               | Downregulated |
| A_21_P000 | 0.001551 | 0.000191 | -1.33 | SNORA70C       | small nucleolar RNA, H/ACA box 70C                                     | Downregulated |
| A_19_P003 | 0.001595 | 0.0002   | -1.33 | FLJ32255       | uncharacterized LOC643977                                              | Downregulated |
| A_23_P391 | 0.001698 | 0.000225 | -1.33 | LPHN1          | latrophilin 1                                                          | Downregulated |
| A_23_P212 | 0.001802 | 0.000249 | -1.33 | NKTR           | natural killer cell triggering receptor                                | Downregulated |
| A_22_P000 | 0.002124 | 0.000335 | -1.33 | LOC1001297     | uncharacterized LOC100129781                                           | Downregulated |
| A_23_P432 | 0.002183 | 0.00035  | -1.33 | RTN4RL1        | reticulon 4 receptor-like 1                                            | Downregulated |
| A_23_P847 | 0.002221 | 0.00036  | -1.33 | PLRG1          | pleiotropic regulator 1                                                | Downregulated |
| A_33_P327 | 0.002849 | 0.000524 | -1.33 | RHOQ           | ras homolog family member Q                                            | Downregulated |

|           |          |          |       |              |                                                                       |               |
|-----------|----------|----------|-------|--------------|-----------------------------------------------------------------------|---------------|
| A_33_P369 | 0.002892 | 0.000537 | -1.33 | SEMA4D       | sema domain, immunoglobulin domain (Ig), transmembrane domain (TM)    | Downregulated |
| A_21_P000 | 0.002931 | 0.000547 | -1.33 | SNORA70      | small nucleolar RNA, H/ACA box 70                                     | Downregulated |
| A_33_P330 | 0.003158 | 0.000617 | -1.33 | KIAA1549L    | KIAA1549-like                                                         | Downregulated |
| A_23_P329 | 0.004315 | 0.000979 | -1.33 | ARMC10       | armadillo repeat containing 10                                        | Downregulated |
| A_23_P103 | 0.0059   | 0.00154  | -1.33 | AKR7A3       | aldo-keto reductase family 7, member A3 (afatoxin aldehyde reductase) | Downregulated |
| A_21_P001 | 0.006544 | 0.00179  | -1.33 | LOC1002880   | uncharacterized LOC100288069                                          | Downregulated |
| A_23_P855 | 0.00863  | 0.00262  | -1.33 | RNF2         | ring finger protein 2                                                 | Downregulated |
| A_33_P384 | 0.010475 | 0.00339  | -1.33 | MAGI1-IT1    | MAGI1 intronic transcript 1 (non-protein coding)                      | Downregulated |
| A_22_P000 | 0.011167 | 0.00368  | -1.33 | RNF219-AS1   | RNF219 antisense RNA 1                                                | Downregulated |
| A_32_P133 | 0.011499 | 0.00383  | -1.33 | SPON1        | spondin 1, extracellular matrix protein                               | Downregulated |
| A_22_P000 | 0.016121 | 0.00594  | -1.33 | lnc-TM9SF2-2 | lnc-TM9SF2-2:1                                                        | Downregulated |
| A_33_P330 | 0.02602  | 0.0108   | -1.33 | TPP2         | tripeptidyl peptidase II                                              | Downregulated |
| A_21_P000 | 0.029173 | 0.0125   | -1.33 | lnc-NTRK2-3  | lnc-NTRK2-3:1                                                         | Downregulated |
| A_21_P000 | 0.035596 | 0.0159   | -1.33 | SNORA11      | small nucleolar RNA, H/ACA box 11                                     | Downregulated |
| A_22_P000 | 0.046324 | 0.0219   | -1.33 | lnc-PIK3R1-3 | lnc-PIK3R1-3:1                                                        | Downregulated |
| A_21_P000 | 0.051724 | 0.025    | -1.33 | lnc-RPL24-2  | lnc-RPL24-2:4                                                         | Downregulated |
| A_24_P151 | 0.076749 | 0.04     | -1.33 | MYL4         | myosin, light chain 4, alkali; atrial, embryonic                      | Downregulated |
| A_33_P323 | 0.001286 | 0.000136 | -1.34 | TSC22D3      | TSC22 domain family, member 3                                         | Downregulated |
| A_24_P944 | 0.001299 | 0.000139 | -1.34 | HP1BP3       | heterochromatin protein 1, binding protein 3                          | Downregulated |
| A_24_P837 | 0.001324 | 0.000143 | -1.34 | SPNS2        | spinster homolog 2 (Drosophila)                                       | Downregulated |
| A_33_P327 | 0.001383 | 0.000154 | -1.34 | DNMT3A       | DNA (cytosine-5-)-methyltransferase 3 alpha                           | Downregulated |
| A_33_P332 | 0.001404 | 0.00016  | -1.34 | RAB8A        | RAB8A, member RAS oncogene family                                     | Downregulated |
| A_23_P362 | 0.001504 | 0.000181 | -1.34 | UBR2         | ubiquitin protein ligase E3 component n-recognin 2                    | Downregulated |
| A_23_P207 | 0.00152  | 0.000184 | -1.34 | BRCA1        | breast cancer 1, early onset                                          | Downregulated |
| A_24_P194 | 0.001556 | 0.000192 | -1.34 | FXVD5        | FXVD domain containing ion transport regulator 5                      | Downregulated |
| A_24_P285 | 0.001696 | 0.000224 | -1.34 | IDS          | iduronate 2-sulfatase                                                 | Downregulated |
| A_21_P000 | 0.001958 | 0.000289 | -1.34 | SNORD5       | small nucleolar RNA, C/D box 5                                        | Downregulated |
| A_21_P000 | 0.002    | 0.0003   | -1.34 | lnc-AC069257 | lnc-AC069257.9.1-5:2                                                  | Downregulated |
| A_24_P406 | 0.002719 | 0.000488 | -1.34 | MTMR2        | myotubularin related protein 2                                        | Downregulated |
| A_24_P520 | 0.002886 | 0.000534 | -1.34 | PDS5A        | PDS5 cohesin associated factor A                                      | Downregulated |
| A_24_P272 | 0.002889 | 0.000536 | -1.34 | AVL9         | AVL9 homolog (S. cerevisiae)                                          | Downregulated |
| A_24_P631 | 0.003155 | 0.000615 | -1.34 | P2RY13       | purinergic receptor P2Y, G-protein coupled, 13                        | Downregulated |
| A_23_P111 | 0.003155 | 0.000615 | -1.34 | RSPO3        | R-spondin 3                                                           | Downregulated |
| A_24_P370 | 0.003203 | 0.000631 | -1.34 | MAN2B1       | mannosidase, alpha, class 2B, member 1                                | Downregulated |
| A_23_P462 | 0.005346 | 0.00134  | -1.34 | CELA2A       | chymotrypsin-like elastase family, member 2A                          | Downregulated |
| A_32_P723 | 0.005869 | 0.00153  | -1.34 | TRIM59       | tripartite motif containing 59                                        | Downregulated |
| A_32_P226 | 0.00616  | 0.00164  | -1.34 | ZFH2         | zinc finger homeobox 2                                                | Downregulated |

|           |          |          |       |              |                                                                        |               |
|-----------|----------|----------|-------|--------------|------------------------------------------------------------------------|---------------|
| A_33_P325 | 0.007979 | 0.00236  | -1.34 | SLC35B4      | solute carrier family 35 (UDP-xylose/UDP-N-acetylglucosamine transport | Downregulated |
| A_33_P384 | 0.009157 | 0.00284  | -1.34 | FRYL         | FRY-like                                                               | Downregulated |
| A_33_P333 | 0.010538 | 0.00342  | -1.34 | SCARNA13     | small Cajal body-specific RNA 13                                       | Downregulated |
| A_23_P229 | 0.012416 | 0.00423  | -1.34 | NFYC         | nuclear transcription factor Y, gamma                                  | Downregulated |
| A_24_P373 | 0.051456 | 0.0248   | -1.34 | C19orf25     | chromosome 19 open reading frame 25                                    | Downregulated |
| A_23_P319 | 0.001265 | 0.000132 | -1.35 | VPS28        | vacuolar protein sorting 28 homolog (S. cerevisiae)                    | Downregulated |
| A_22_P000 | 0.001301 | 0.000139 | -1.35 | LINC01258    | long intergenic non-protein coding RNA 1258                            | Downregulated |
| A_23_P405 | 0.001322 | 0.000143 | -1.35 | WIZ          | widely interspaced zinc finger motifs                                  | Downregulated |
| A_21_P001 | 0.001376 | 0.000153 | -1.35 | CS           | citrate synthase                                                       | Downregulated |
| A_32_P181 | 0.001398 | 0.000158 | -1.35 | DOCK8        | dedicator of cytokinesis 8                                             | Downregulated |
| A_22_P000 | 0.001474 | 0.000174 | -1.35 | lnc-SETDB1-1 | lnc-SETDB1-1:2                                                         | Downregulated |
| A_32_P900 | 0.001478 | 0.000176 | -1.35 | C4orf48      | chromosome 4 open reading frame 48                                     | Downregulated |
| A_23_P676 | 0.001492 | 0.000179 | -1.35 | CAPNS1       | calpain, small subunit 1                                               | Downregulated |
| A_23_P270 | 0.001636 | 0.000211 | -1.35 | UBE2G1       | ubiquitin-conjugating enzyme E2G 1                                     | Downregulated |
| A_23_P108 | 0.001706 | 0.000228 | -1.35 | TLR1         | toll-like receptor 1                                                   | Downregulated |
| A_33_P325 | 0.001916 | 0.000278 | -1.35 | SNORD3B-1    | small nucleolar RNA, C/D box 3B-1                                      | Downregulated |
| A_33_P325 | 0.002013 | 0.000304 | -1.35 | MYLIP        | myosin regulatory light chain interacting protein                      | Downregulated |
| A_32_P207 | 0.002034 | 0.00031  | -1.35 | ARL16        | ADP-ribosylation factor-like 16                                        | Downregulated |
| A_23_P375 | 0.002078 | 0.000322 | -1.35 | COL19A1      | collagen, type XIX, alpha 1                                            | Downregulated |
| A_23_P254 | 0.002117 | 0.000332 | -1.35 | CENPU        | centromere protein U                                                   | Downregulated |
| A_33_P322 | 0.002391 | 0.000402 | -1.35 | CYFIP2       | cytoplasmic FMR1 interacting protein 2                                 | Downregulated |
| A_22_P000 | 0.002411 | 0.000406 | -1.35 | lnc-NFYB-2   | lnc-NFYB-2:1                                                           | Downregulated |
| A_21_P000 | 0.002836 | 0.00052  | -1.35 | lnc-AMELY-4  | lnc-AMELY-4:1                                                          | Downregulated |
| A_21_P000 | 0.003022 | 0.000575 | -1.35 | SYS1         | Sys1 golgi trafficking protein                                         | Downregulated |
| A_24_P199 | 0.004441 | 0.00102  | -1.35 | RNF2         | ring finger protein 2                                                  | Downregulated |
| A_33_P321 | 0.004694 | 0.00111  | -1.35 | FCHSD2       | FCH and double SH3 domains 2                                           | Downregulated |
| A_24_P734 | 0.005017 | 0.00122  | -1.35 | CCNYL1       | cyclin Y-like 1                                                        | Downregulated |
| A_23_P317 | 0.006006 | 0.00158  | -1.35 | ANAPC4       | anaphase promoting complex subunit 4                                   | Downregulated |
| A_24_P244 | 0.00628  | 0.00169  | -1.35 | ANAPC15      | anaphase promoting complex subunit 15                                  | Downregulated |
| A_23_P999 | 0.006837 | 0.0019   | -1.35 | MAGEL2       | MAGE-like 2                                                            | Downregulated |
| A_23_P170 | 0.00999  | 0.00319  | -1.35 | TRAIIP       | TRAF interacting protein                                               | Downregulated |
| A_23_P159 | 0.021596 | 0.00854  | -1.35 | TOPBP1       | topoisomerase (DNA) II binding protein 1                               | Downregulated |
| A_22_P000 | 0.021708 | 0.00859  | -1.35 | EIF4ENIF1    | eukaryotic translation initiation factor 4E nuclear import factor 1    | Downregulated |
| A_24_P797 | 0.028393 | 0.0121   | -1.35 | COX20        | COX20 cytochrome c oxidase assembly factor                             | Downregulated |
| A_23_P316 | 0.029195 | 0.0125   | -1.35 | GLIS1        | GLIS family zinc finger 1                                              | Downregulated |
| A_22_P000 | 0.033609 | 0.0148   | -1.35 | lnc-NUB1-1   | lnc-NUB1-1:4                                                           | Downregulated |
| A_23_P143 | 0.04558  | 0.0215   | -1.35 | ATP6V1E2     | ATPase, H+ transporting, lysosomal 31kDa, V1 subunit E2                | Downregulated |

|           |          |          |       |                |                                                                           |               |
|-----------|----------|----------|-------|----------------|---------------------------------------------------------------------------|---------------|
| A_23_P215 | 0.00124  | 0.000126 | -1.36 | IGFBP3         | insulin-like growth factor binding protein 3                              | Downregulated |
| A_21_P000 | 0.001375 | 0.000153 | -1.36 | SNORD43        | small nucleolar RNA, C/D box 43                                           | Downregulated |
| A_21_P001 | 0.001391 | 0.000156 | -1.36 | LOC1019273     | uncharacterized LOC101927372                                              | Downregulated |
| A_24_P242 | 0.00151  | 0.000183 | -1.36 | ZRANB2         | zinc finger, RAN-binding domain containing 2                              | Downregulated |
| A_33_P324 | 0.001626 | 0.000208 | -1.36 | MPP5           | membrane protein, palmitoylated 5 (MAGUK p55 subfamily member 5)          | Downregulated |
| A_22_P000 | 0.001772 | 0.000242 | -1.36 | COQ9           | coenzyme Q9                                                               | Downregulated |
| A_33_P336 | 0.002016 | 0.000305 | -1.36 | IFNAR2         | interferon (alpha, beta and omega) receptor 2                             | Downregulated |
| A_23_P925 | 0.002243 | 0.000366 | -1.36 | SCFD2          | sec1 family domain containing 2                                           | Downregulated |
| A_24_P385 | 0.002327 | 0.000385 | -1.36 | SP100          | SP100 nuclear antigen                                                     | Downregulated |
| A_33_P367 | 0.002752 | 0.000498 | -1.36 | VPS36          | vacuolar protein sorting 36 homolog (S. cerevisiae)                       | Downregulated |
| A_33_P339 | 0.003826 | 0.000819 | -1.36 | TP53I3         | tumor protein p53 inducible protein 3                                     | Downregulated |
| A_33_P321 | 0.005855 | 0.00153  | -1.36 | ERN2           | endoplasmic reticulum to nucleus signaling 2                              | Downregulated |
| A_24_P210 | 0.006362 | 0.00172  | -1.36 | C11orf71       | chromosome 11 open reading frame 71                                       | Downregulated |
| A_22_P000 | 0.00714  | 0.00203  | -1.36 | lnc-MRPL40-2   | lnc-MRPL40-2:1                                                            | Downregulated |
| A_22_P000 | 0.010862 | 0.00355  | -1.36 | lnc-POLR1E-2   | lnc-POLR1E-2:1                                                            | Downregulated |
| A_23_P391 | 0.012359 | 0.00421  | -1.36 | RUVBL2         | RuvB-like AAA ATPase 2                                                    | Downregulated |
| A_24_P123 | 0.026335 | 0.011    | -1.36 | HNRNPD         | heterogeneous nuclear ribonucleoprotein D (AU-rich element RNA binding)   | Downregulated |
| A_33_P323 | 0.063842 | 0.0322   | -1.36 | RMND5A         | required for meiotic nuclear division 5 homolog A (S. cerevisiae)         | Downregulated |
| A_23_P314 | 0.00124  | 0.000127 | -1.37 | PRKAG2         | protein kinase, AMP-activated, gamma 2 non-catalytic subunit              | Downregulated |
| A_33_P333 | 0.001245 | 0.000128 | -1.37 | RPA2           | replication protein A2, 32kDa                                             | Downregulated |
| A_24_P217 | 0.001304 | 0.00014  | -1.37 | SLC3A1         | solute carrier family 3 (amino acid transporter heavy chain), member 1    | Downregulated |
| A_23_P385 | 0.001314 | 0.000141 | -1.37 | STAMBPL1       | STAM binding protein-like 1                                               | Downregulated |
| A_33_P339 | 0.001342 | 0.000147 | -1.37 | TLK2           | tousled-like kinase 2                                                     | Downregulated |
| A_23_P269 | 0.001376 | 0.000153 | -1.37 | POLG2          | polymerase (DNA directed), gamma 2, accessory subunit                     | Downregulated |
| A_32_P989 | 0.001544 | 0.00019  | -1.37 | C15orf57       | chromosome 15 open reading frame 57                                       | Downregulated |
| A_33_P338 | 0.001767 | 0.000241 | -1.37 | CXCR3          | chemokine (C-X-C motif) receptor 3                                        | Downregulated |
| A_33_P682 | 0.002006 | 0.000302 | -1.37 | NFATC3         | nuclear factor of activated T-cells, cytoplasmic, calcineurin-dependent 3 | Downregulated |
| A_32_P117 | 0.002006 | 0.000302 | -1.37 | PMS2P4         | postmeiotic segregation increased 2 pseudogene 4                          | Downregulated |
| A_22_P000 | 0.002607 | 0.000459 | -1.37 | ERN1           | endoplasmic reticulum to nucleus signaling 1                              | Downregulated |
| A_24_P188 | 0.003064 | 0.000587 | -1.37 | VPS18          | vacuolar protein sorting 18 homolog (S. cerevisiae)                       | Downregulated |
| A_33_P349 | 0.003158 | 0.000616 | -1.37 | TMEM65         | transmembrane protein 65                                                  | Downregulated |
| A_24_P268 | 0.004312 | 0.000977 | -1.37 | DRAM2          | DNA-damage regulated autophagy modulator 2                                | Downregulated |
| A_21_P000 | 0.005097 | 0.00125  | -1.37 | lnc-VN1R2-1    | lnc-VN1R2-1:2                                                             | Downregulated |
| A_23_P545 | 0.005204 | 0.00129  | -1.37 | TYRO3          | TYRO3 protein tyrosine kinase                                             | Downregulated |
| A_33_P323 | 0.006202 | 0.00166  | -1.37 | TGFB111        | transforming growth factor beta 1 induced transcript 1                    | Downregulated |
| A_24_P576 | 0.006513 | 0.00178  | -1.37 | SPRN           | shadow of prion protein homolog (zebrafish)                               | Downregulated |
| A_21_P001 | 0.006967 | 0.00196  | -1.37 | XLOC_I2_004854 |                                                                           | Downregulated |

|           |          |          |       |                |                                                            |               |
|-----------|----------|----------|-------|----------------|------------------------------------------------------------|---------------|
| A_21_P000 | 0.008371 | 0.00252  | -1.37 | LOC1019287     | uncharacterized LOC101928767                               | Downregulated |
| A_33_P321 | 0.008877 | 0.00272  | -1.37 | RAP1GDS1       | RAP1, GTP-GDP dissociation stimulator 1                    | Downregulated |
| A_23_P250 | 0.011589 | 0.00388  | -1.37 | RAB1A          | RAB1A, member RAS oncogene family                          | Downregulated |
| A_22_P000 | 0.020456 | 0.00799  | -1.37 | CASP8AP2       | caspase 8 associated protein 2                             | Downregulated |
| A_23_P344 | 0.026279 | 0.011    | -1.37 | OGG1           | 8-oxoguanine DNA glycosylase                               | Downregulated |
| A_33_P330 | 0.042003 | 0.0195   | -1.37 | PDIK1L         | PDLIM1 interacting kinase 1 like                           | Downregulated |
| A_23_P219 | 0.001214 | 0.000122 | -1.38 | ABCC10         | ATP-binding cassette, sub-family C (CFTR/MRP), member 10   | Downregulated |
| A_21_P000 | 0.001222 | 0.000123 | -1.38 | LINC00629      | long intergenic non-protein coding RNA 629                 | Downregulated |
| A_23_P128 | 0.001244 | 0.000128 | -1.38 | ZFYVE1         | zinc finger, FYVE domain containing 1                      | Downregulated |
| A_23_P888 | 0.001258 | 0.000131 | -1.38 | CMTM3          | CKLF-like MARVEL transmembrane domain containing 3         | Downregulated |
| A_23_P170 | 0.001268 | 0.000133 | -1.38 | PMCHL1         | pro-melanin-concentrating hormone-like 1, pseudogene       | Downregulated |
| A_24_P350 | 0.001324 | 0.000143 | -1.38 | KIAA0907       | KIAA0907                                                   | Downregulated |
| A_19_P008 | 0.001394 | 0.000157 | -1.38 | LINC01215      | long intergenic non-protein coding RNA 1215                | Downregulated |
| A_33_P322 | 0.001433 | 0.000165 | -1.38 | SCPEP1         | serine carboxypeptidase 1                                  | Downregulated |
| A_33_P334 | 0.001576 | 0.000197 | -1.38 | C16orf13       | chromosome 16 open reading frame 13                        | Downregulated |
| A_24_P852 | 0.001603 | 0.000202 | -1.38 | ELMSAN1        | ELM2 and Myb/SANT-like domain containing 1                 | Downregulated |
| A_23_P363 | 0.001611 | 0.000204 | -1.38 | CGGBP1         | CGG triplet repeat binding protein 1                       | Downregulated |
| A_23_P148 | 0.001802 | 0.000249 | -1.38 | CUL4B          | cullin 4B                                                  | Downregulated |
| A_22_P000 | 0.0018   | 0.000249 | -1.38 | lnc-FBXO25-2   | lnc-FBXO25-2:1                                             | Downregulated |
| A_21_P000 | 0.002243 | 0.000366 | -1.38 | PDCD6IP        | programmed cell death 6 interacting protein                | Downregulated |
| A_23_P251 | 0.002243 | 0.000366 | -1.38 | TEX261         | testis expressed 261                                       | Downregulated |
| A_32_P144 | 0.002872 | 0.00053  | -1.38 | PARP4          | poly (ADP-ribose) polymerase family, member 4              | Downregulated |
| A_22_P000 | 0.003109 | 0.000602 | -1.38 | C21orf2        | chromosome 21 open reading frame 2                         | Downregulated |
| A_21_P000 | 0.008213 | 0.00245  | -1.38 | lnc-ZSWIM2-4   | lnc-ZSWIM2-4:1                                             | Downregulated |
| A_33_P336 | 0.01315  | 0.00455  | -1.38 | BAGE           | B melanoma antigen                                         | Downregulated |
| A_22_P000 | 0.013209 | 0.00458  | -1.38 | lnc-OLR1-2     | lnc-OLR1-2:1                                               | Downregulated |
| A_21_P001 | 0.014311 | 0.00509  | -1.38 | XLOC_I2_004180 |                                                            | Downregulated |
| A_33_P666 | 0.018713 | 0.00716  | -1.38 | PRIM2          | primase, DNA, polypeptide 2 (58kDa)                        | Downregulated |
| A_23_P771 | 0.025006 | 0.0103   | -1.38 | TM6SF1         | transmembrane 6 superfamily member 1                       | Downregulated |
| A_24_P405 | 0.028067 | 0.0119   | -1.38 | PDIK1L         | PDLIM1 interacting kinase 1 like                           | Downregulated |
| A_23_P687 | 0.029266 | 0.0125   | -1.38 | PDXK           | pyridoxal (pyridoxine, vitamin B6) kinase                  | Downregulated |
| A_22_P000 | 0.053737 | 0.0262   | -1.38 | lnc-ACCSL-1    | lnc-ACCSL-1:1                                              | Downregulated |
| A_22_P000 | 0.063259 | 0.0318   | -1.38 | lnc-MIER3-2    | lnc-MIER3-2:1                                              | Downregulated |
| A_21_P001 | 0.00121  | 0.000121 | -1.39 | PRDX6          | peroxiredoxin 6                                            | Downregulated |
| A_24_P418 | 0.001215 | 0.000122 | -1.39 | MACF1          | microtubule-actin crosslinking factor 1                    | Downregulated |
| A_33_P337 | 0.001324 | 0.000143 | -1.39 | CHAC1          | ChaC glutathione-specific gamma-glutamylcyclotransferase 1 | Downregulated |
| A_23_P129 | 0.001534 | 0.000187 | -1.39 | USP8           | ubiquitin specific peptidase 8                             | Downregulated |

|           |          |          |       |                |                                                                    |               |
|-----------|----------|----------|-------|----------------|--------------------------------------------------------------------|---------------|
| A_33_P339 | 0.001688 | 0.000222 | -1.39 | ACOXL          | acyl-CoA oxidase-like                                              | Downregulated |
| A_23_P103 | 0.001726 | 0.000231 | -1.39 | PSEN2          | presenilin 2                                                       | Downregulated |
| A_22_P000 | 0.002211 | 0.000356 | -1.39 | lnc-CTU2-2     | lnc-CTU2-2:1                                                       | Downregulated |
| A_23_P144 | 0.002564 | 0.000447 | -1.39 | NAP1L5         | nucleosome assembly protein 1-like 5                               | Downregulated |
| A_24_P294 | 0.003518 | 0.000723 | -1.39 | ATXN1          | ataxin 1                                                           | Downregulated |
| A_33_P323 | 0.006124 | 0.00163  | -1.39 | CDC14B         | cell division cycle 14B                                            | Downregulated |
| A_24_P108 | 0.0097   | 0.00307  | -1.39 | IMPACT         | impact RWD domain protein                                          | Downregulated |
| A_23_P171 | 0.021169 | 0.00833  | -1.39 | MORC4          | MORC family CW-type zinc finger 4                                  | Downregulated |
| A_21_P001 | 0.034462 | 0.0153   | -1.39 | FAM220A        | family with sequence similarity 220, member A                      | Downregulated |
| A_23_P162 | 0.048135 | 0.0229   | -1.39 | IRAK3          | interleukin-1 receptor-associated kinase 3                         | Downregulated |
| A_23_P962 | 0.052171 | 0.0252   | -1.39 | REEP4          | receptor accessory protein 4                                       | Downregulated |
| A_23_P252 | 0.052391 | 0.0254   | -1.39 | MTRR           | 5-methyltetrahydrofolate-homocysteine methyltransferase reductase  | Downregulated |
| A_33_P339 | 0.055883 | 0.0274   | -1.39 | UBXN11         | UBX domain protein 11                                              | Downregulated |
| A_33_P333 | 0.001492 | 0.000179 | -1.4  | OPTN           | optineurin                                                         | Downregulated |
| A_23_P216 | 0.001544 | 0.00019  | -1.4  | SUSD1          | sushi domain containing 1                                          | Downregulated |
| A_32_P193 | 0.001566 | 0.000195 | -1.4  | RICTOR         | RPTOR independent companion of MTOR, complex 2                     | Downregulated |
| A_23_P356 | 0.001601 | 0.000201 | -1.4  | DESI1          | desumoylating isopeptidase 1                                       | Downregulated |
| A_33_P326 | 0.001711 | 0.000229 | -1.4  | CCDC167        | coiled-coil domain containing 167                                  | Downregulated |
| A_33_P353 | 0.001815 | 0.000253 | -1.4  | LARS           | leucyl-tRNA synthetase                                             | Downregulated |
| A_23_P654 | 0.001813 | 0.000253 | -1.4  | ZBTB17         | zinc finger and BTB domain containing 17                           | Downregulated |
| A_24_P244 | 0.001888 | 0.000271 | -1.4  | MCTP2          | multiple C2 domains, transmembrane 2                               | Downregulated |
| A_33_P329 | 0.00189  | 0.000271 | -1.4  | TRA2B          | transformer 2 beta homolog (Drosophila)                            | Downregulated |
| A_33_P321 | 0.002006 | 0.000302 | -1.4  | ADAMTS7        | ADAM metallopeptidase with thrombospondin type 1 motif, 7          | Downregulated |
| A_32_P185 | 0.002107 | 0.000329 | -1.4  | YBEY           | ybeY metallopeptidase (putative)                                   | Downregulated |
| A_32_P237 | 0.002124 | 0.000336 | -1.4  | XLOC_I2_010916 |                                                                    | Downregulated |
| A_23_P913 | 0.002785 | 0.000506 | -1.4  | GPCPD1         | glycerophosphocholine phosphodiesterase GDE1 homolog (S. cerevisia | Downregulated |
| A_23_P165 | 0.002889 | 0.000535 | -1.4  | ILVBL          | ilvB (bacterial acetolactate synthase)-like                        | Downregulated |
| A_23_P117 | 0.005348 | 0.00134  | -1.4  | LETMD1         | LETM1 domain containing 1                                          | Downregulated |
| A_23_P151 | 0.006398 | 0.00174  | -1.4  | FOXM1          | forkhead box M1                                                    | Downregulated |
| A_33_P324 | 0.006768 | 0.00188  | -1.4  | EBF1           | early B-cell factor 1                                              | Downregulated |
| A_23_P208 | 0.011043 | 0.00363  | -1.4  | AKT2           | v-akt murine thymoma viral oncogene homolog 2                      | Downregulated |
| A_23_P314 | 0.012756 | 0.00438  | -1.4  | ZDHHC19        | zinc finger, DHHC-type containing 19                               | Downregulated |
| A_19_P008 | 0.013059 | 0.00451  | -1.4  | lnc-ITSN1-2    | lnc-ITSN1-2:5                                                      | Downregulated |
| A_24_P937 | 0.013516 | 0.00472  | -1.4  | LOC645984      | uncharacterized LOC645984                                          | Downregulated |
| A_23_P422 | 0.013516 | 0.00472  | -1.4  | SLC35F3        | solute carrier family 35, member F3                                | Downregulated |
| A_22_P000 | 0.016638 | 0.00619  | -1.4  | TTN-AS1        | TTN antisense RNA 1                                                | Downregulated |
| A_33_P382 | 0.020419 | 0.00797  | -1.4  | CCDC112        | coiled-coil domain containing 112                                  | Downregulated |



|           |          |          |       |               |                                                             |               |
|-----------|----------|----------|-------|---------------|-------------------------------------------------------------|---------------|
| A_23_P308 | 0.028784 | 0.0123   | -1.4  | TTC39C        | tetratricopeptide repeat domain 39C                         | Downregulated |
| A_24_P340 | 0.031758 | 0.0138   | -1.4  | SERHL2        | serine hydrolase-like 2                                     | Downregulated |
| A_33_P331 | 0.03786  | 0.0172   | -1.4  | lnc-LIN28B-1  | lnc-LIN28B-1:4                                              | Downregulated |
| A_24_P336 | 0.053672 | 0.0261   | -1.4  | C22orf23      | chromosome 22 open reading frame 23                         | Downregulated |
| A_22_P000 | 0.053672 | 0.0261   | -1.4  | LOC1001322    | uncharacterized LOC100132215                                | Downregulated |
| A_23_P270 | 0.064702 | 0.0327   | -1.4  | LPAR6         | lysophosphatidic acid receptor 6                            | Downregulated |
| A_23_P367 | 0.079233 | 0.0416   | -1.4  | ALDH2         | aldehyde dehydrogenase 2 family (mitochondrial)             | Downregulated |
| A_22_P000 | 0.001178 | 0.000114 | -1.41 | lnc-COLQ-1    | lnc-COLQ-1:1                                                | Downregulated |
| A_23_P399 | 0.001198 | 0.000118 | -1.41 | IL12RB1       | interleukin 12 receptor, beta 1                             | Downregulated |
| A_23_P134 | 0.00146  | 0.000172 | -1.41 | COG5          | component of oligomeric golgi complex 5                     | Downregulated |
| A_23_P408 | 0.001581 | 0.000198 | -1.41 | CHST2         | carbohydrate (N-acetylglucosamine-6-O) sulfotransferase 2   | Downregulated |
| A_33_P321 | 0.001711 | 0.000229 | -1.41 | RUNX1         | runt-related transcription factor 1                         | Downregulated |
| A_24_P409 | 0.001859 | 0.000264 | -1.41 | NPEPPS        | aminopeptidase puromycin sensitive                          | Downregulated |
| A_24_P252 | 0.002034 | 0.00031  | -1.41 | NHLRC2        | NHL repeat containing 2                                     | Downregulated |
| A_23_P253 | 0.002459 | 0.000417 | -1.41 | CENPE         | centromere protein E, 312kDa                                | Downregulated |
| A_32_P228 | 0.002597 | 0.000456 | -1.41 | GAPVD1        | GTPase activating protein and VPS9 domains 1                | Downregulated |
| A_33_P337 | 0.003439 | 0.0007   | -1.41 | FBXO32        | F-box protein 32                                            | Downregulated |
| A_33_P324 | 0.00391  | 0.000846 | -1.41 | AGO3          | argonaute RISC catalytic component 3                        | Downregulated |
| A_24_P212 | 0.003973 | 0.000864 | -1.41 | ZNF33A        | zinc finger protein 33A                                     | Downregulated |
| A_23_P374 | 0.004031 | 0.000882 | -1.41 | SH3KBP1       | SH3-domain kinase binding protein 1                         | Downregulated |
| A_33_P335 | 0.005304 | 0.00133  | -1.41 | ZNF639        | zinc finger protein 639                                     | Downregulated |
| A_21_P001 | 0.006445 | 0.00176  | -1.41 | LOC1019297    | uncharacterized LOC101929787                                | Downregulated |
| A_21_P001 | 0.007457 | 0.00215  | -1.41 | lnc-C21orf63- | lnc-C21orf63-2:2                                            | Downregulated |
| A_33_P325 | 0.007707 | 0.00225  | -1.41 | ANKS1B        | ankyrin repeat and sterile alpha motif domain containing 1B | Downregulated |
| A_19_P003 | 0.008533 | 0.00258  | -1.41 | LINC01278     | long intergenic non-protein coding RNA 1278                 | Downregulated |
| A_24_P193 | 0.014153 | 0.00501  | -1.41 | RAB15         | RAB15, member RAS oncogene family                           | Downregulated |
| A_33_P337 | 0.014169 | 0.00502  | -1.41 | CLIC4         | chloride intracellular channel 4                            | Downregulated |
| A_22_P000 | 0.015189 | 0.00551  | -1.41 | lnc-SHISA9-1  | lnc-SHISA9-1:1                                              | Downregulated |
| A_24_P225 | 0.017171 | 0.00644  | -1.41 | DPH3          | diphthamide biosynthesis 3                                  | Downregulated |
| A_22_P000 | 0.038453 | 0.0175   | -1.41 | TM4SF19-AS    | TM4SF19 antisense RNA 1                                     | Downregulated |
| A_22_P000 | 0.065863 | 0.0334   | -1.41 | lnc-BLID-3    | lnc-BLID-3:2                                                | Downregulated |
| A_23_P321 | 0.001349 | 0.000148 | -1.42 | CLECL1        | C-type lectin-like 1                                        | Downregulated |
| A_22_P000 | 0.001445 | 0.000168 | -1.42 | lnc-LPIN2-1   | lnc-LPIN2-1:2                                               | Downregulated |
| A_33_P320 | 0.001503 | 0.000181 | -1.42 | WDFY4         | WDFY family member 4                                        | Downregulated |
| A_23_P204 | 0.001548 | 0.000191 | -1.42 | AKAP11        | A kinase (PRKA) anchor protein 11                           | Downregulated |
| A_33_P332 | 0.001611 | 0.000204 | -1.42 | CAPZA2        | capping protein (actin filament) muscle Z-line, alpha 2     | Downregulated |
| A_23_P112 | 0.001815 | 0.000253 | -1.42 | ATF7IP        | activating transcription factor 7 interacting protein       | Downregulated |

|           |          |          |       |                |                                                        |               |
|-----------|----------|----------|-------|----------------|--------------------------------------------------------|---------------|
| A_23_P129 | 0.002243 | 0.000366 | -1.42 | PRDX5          | peroxiredoxin 5                                        | Downregulated |
| A_33_P328 | 0.004602 | 0.00108  | -1.42 | AAK1           | AP2 associated kinase 1                                | Downregulated |
| A_24_P398 | 0.006867 | 0.00191  | -1.42 | EIF5           | eukaryotic translation initiation factor 5             | Downregulated |
| A_33_P339 | 0.008555 | 0.00259  | -1.42 | SPIN4          | spindlin family, member 4                              | Downregulated |
| A_23_P152 | 0.008584 | 0.0026   | -1.42 | SLC16A6        | solute carrier family 16, member 6                     | Downregulated |
| A_23_P126 | 0.011921 | 0.00402  | -1.42 | CLSPN          | claspin                                                | Downregulated |
| A_21_P000 | 0.01794  | 0.0068   | -1.42 | LOC440028      | uncharacterized LOC440028                              | Downregulated |
| A_24_P392 | 0.020558 | 0.00804  | -1.42 | GLTPD2         | glycolipid transfer protein domain containing 2        | Downregulated |
| A_33_P322 | 0.034839 | 0.0155   | -1.42 | ZNF705B        | zinc finger protein 705B                               | Downregulated |
| A_21_P000 | 0.037459 | 0.017    | -1.42 | LOC1025462     | uncharacterized LOC102546298                           | Downregulated |
| A_33_P323 | 0.050072 | 0.024    | -1.42 | UROS           | uroporphyrinogen III synthase                          | Downregulated |
| A_33_P332 | 0.056347 | 0.0277   | -1.42 | MAST2          | microtubule associated serine/threonine kinase 2       | Downregulated |
| A_23_P121 | 0.066933 | 0.034    | -1.42 | CAMK1          | calcium/calmodulin-dependent protein kinase I          | Downregulated |
| A_24_P985 | 0.001226 | 0.000124 | -1.43 | PPP3CB         | protein phosphatase 3, catalytic subunit, beta isozyme | Downregulated |
| A_23_P308 | 0.001254 | 0.00013  | -1.43 | RRP36          | ribosomal RNA processing 36 homolog (S. cerevisiae)    | Downregulated |
| A_23_P164 | 0.001307 | 0.00014  | -1.43 | PSMC5          | proteasome (prosome, macropain) 26S subunit, ATPase, 5 | Downregulated |
| A_23_P191 | 0.001316 | 0.000142 | -1.43 | GSPT2          | G1 to S phase transition 2                             | Downregulated |
| A_23_P162 | 0.001333 | 0.000144 | -1.43 | CCDC90B        | coiled-coil domain containing 90B                      | Downregulated |
| A_21_P001 | 0.001328 | 0.000144 | -1.43 | INTS4          | integrator complex subunit 4                           | Downregulated |
| A_33_P326 | 0.001533 | 0.000187 | -1.43 | MSL1           | male-specific lethal 1 homolog (Drosophila)            | Downregulated |
| A_23_P455 | 0.001785 | 0.000245 | -1.43 | SETBP1         | SET binding protein 1                                  | Downregulated |
| A_22_P000 | 0.00207  | 0.000319 | -1.43 | LOC1001309     | uncharacterized LOC100130950                           | Downregulated |
| A_22_P000 | 0.002597 | 0.000456 | -1.43 | KCNMA1-AS2     | KCNMA1 antisense RNA 2                                 | Downregulated |
| A_23_P109 | 0.002597 | 0.000456 | -1.43 | TADA3          | transcriptional adaptor 3                              | Downregulated |
| A_22_P000 | 0.00435  | 0.000992 | -1.43 | lnc-DYNLRB1    | lnc-DYNLRB1-1:1                                        | Downregulated |
| A_22_P000 | 0.00435  | 0.000992 | -1.43 | lnc-LPPR5.1-   | lnc-LPPR5.1-1:1                                        | Downregulated |
| A_23_P124 | 0.00435  | 0.000992 | -1.43 | NSD1           | nuclear receptor binding SET domain protein 1          | Downregulated |
| A_21_P001 | 0.004701 | 0.00111  | -1.43 | XLOC_I2_009469 |                                                        | Downregulated |
| A_22_P000 | 0.005023 | 0.00122  | -1.43 | lnc-ARF6-2     | lnc-ARF6-2:1                                           | Downregulated |
| A_21_P000 | 0.006446 | 0.00176  | -1.43 | LINC00662      | long intergenic non-protein coding RNA 662             | Downregulated |
| A_23_P229 | 0.007088 | 0.002    | -1.43 | HELB           | helicase (DNA) B                                       | Downregulated |
| A_33_P337 | 0.008871 | 0.00272  | -1.43 | MIER3          | mesoderm induction early response 1, family member 3   | Downregulated |
| A_23_P380 | 0.012265 | 0.00417  | -1.43 | R3HDM1         | R3H domain containing 1                                | Downregulated |
| A_32_P900 | 0.017341 | 0.00652  | -1.43 | ARMC10         | armadillo repeat containing 10                         | Downregulated |
| A_22_P000 | 0.02943  | 0.0126   | -1.43 | LINC00523      | long intergenic non-protein coding RNA 523             | Downregulated |
| A_33_P328 | 0.001134 | 0.000106 | -1.44 | MBIP           | MAP3K12 binding inhibitory protein 1                   | Downregulated |
| A_32_P162 | 0.001187 | 0.000116 | -1.44 | ARHGAP18       | Rho GTPase activating protein 18                       | Downregulated |

|           |          |          |       |                |                                                                     |               |
|-----------|----------|----------|-------|----------------|---------------------------------------------------------------------|---------------|
| A_23_P201 | 0.001186 | 0.000116 | -1.44 | FCRL5          | Fc receptor-like 5                                                  | Downregulated |
| A_23_P111 | 0.00121  | 0.000121 | -1.44 | ATG5           | autophagy related 5                                                 | Downregulated |
| A_33_P377 | 0.00122  | 0.000123 | -1.44 | PRKACB         | protein kinase, cAMP-dependent, catalytic, beta                     | Downregulated |
| A_23_P384 | 0.001227 | 0.000124 | -1.44 | GYG1           | glycogenin 1                                                        | Downregulated |
| A_33_P324 | 0.001245 | 0.000128 | -1.44 | LAMTOR2        | late endosomal/lysosomal adaptor, MAPK and MTOR activator 2         | Downregulated |
| A_33_P322 | 0.001445 | 0.000168 | -1.44 | HIPK2          | homeodomain interacting protein kinase 2                            | Downregulated |
| A_23_P904 | 0.001548 | 0.00019  | -1.44 | RBM42          | RNA binding motif protein 42                                        | Downregulated |
| A_23_P112 | 0.001683 | 0.00022  | -1.44 | KIAA0196       | KIAA0196                                                            | Downregulated |
| A_22_P000 | 0.001687 | 0.000221 | -1.44 | lnc-PPP1R1A    | lnc-PPP1R1A-2:1                                                     | Downregulated |
| A_22_P000 | 0.001702 | 0.000227 | -1.44 | lnc-TUBB-7     | lnc-TUBB-7:1                                                        | Downregulated |
| A_32_P140 | 0.001935 | 0.000282 | -1.44 | PMS2           | PMS2 postmeiotic segregation increased 2 (S. cerevisiae)            | Downregulated |
| A_24_P160 | 0.002374 | 0.000397 | -1.44 | MRPL55         | mitochondrial ribosomal protein L55                                 | Downregulated |
| A_23_P101 | 0.002538 | 0.00044  | -1.44 | BCAT2          | branched chain amino-acid transaminase 2, mitochondrial             | Downregulated |
| A_23_P551 | 0.003747 | 0.000794 | -1.44 | G6PC3          | glucose 6 phosphatase, catalytic, 3                                 | Downregulated |
| A_22_P000 | 0.004159 | 0.000924 | -1.44 | VIPR1-AS1      | VIPR1 antisense RNA 1                                               | Downregulated |
| A_23_P207 | 0.004658 | 0.0011   | -1.44 | CARD14         | caspase recruitment domain family, member 14                        | Downregulated |
| A_21_P000 | 0.007914 | 0.00233  | -1.44 | RBM4           | RNA binding motif protein 4                                         | Downregulated |
| A_33_P336 | 0.00812  | 0.00241  | -1.44 | CRNDE          | colorectal neoplasia differentially expressed (non-protein coding)  | Downregulated |
| A_21_P001 | 0.015267 | 0.00554  | -1.44 | XLOC_I2_015536 |                                                                     | Downregulated |
| A_33_P329 | 0.023179 | 0.00933  | -1.44 | TMEM175        | transmembrane protein 175                                           | Downregulated |
| A_23_P850 | 0.037403 | 0.0169   | -1.44 | RHOXF1         | Rhox homeobox family, member 1                                      | Downregulated |
| A_24_P659 | 0.046528 | 0.022    | -1.44 | UQCC1          | ubiquinol-cytochrome c reductase complex assembly factor 1          | Downregulated |
| A_24_P484 | 0.04934  | 0.0236   | -1.44 | CIDCEP         | cell death-inducing DFFA-like effector c pseudogene                 | Downregulated |
| A_33_P336 | 0.001108 | 0.000101 | -1.45 | PPP1R13B       | protein phosphatase 1, regulatory subunit 13B                       | Downregulated |
| A_23_P494 | 0.001117 | 0.000103 | -1.45 | NUDT16L1       | nudix (nucleoside diphosphate linked moiety X)-type motif 16-like 1 | Downregulated |
| A_23_P522 | 0.001149 | 0.000109 | -1.45 | IFIT1          | interferon-induced protein with tetratricopeptide repeats 1         | Downregulated |
| A_33_P681 | 0.00124  | 0.000127 | -1.45 | LOC1005068     | uncharacterized LOC100506844                                        | Downregulated |
| A_33_P335 | 0.001243 | 0.000128 | -1.45 | ING3           | inhibitor of growth family, member 3                                | Downregulated |
| A_24_P329 | 0.00125  | 0.000129 | -1.45 | BTN3A1         | butyrophilin, subfamily 3, member A1                                | Downregulated |
| A_23_P165 | 0.001302 | 0.000139 | -1.45 | LOC1001299     | lectin, galactoside-binding, soluble, 14 pseudogene                 | Downregulated |
| A_33_P321 | 0.001369 | 0.000151 | -1.45 | ZNF684         | zinc finger protein 684                                             | Downregulated |
| A_24_P541 | 0.001375 | 0.000152 | -1.45 | TNFRSF1B       | tumor necrosis factor receptor superfamily, member 1B               | Downregulated |
| A_24_P242 | 0.001453 | 0.00017  | -1.45 | TSN            | translin                                                            | Downregulated |
| A_22_P000 | 0.001492 | 0.000179 | -1.45 | MED6           | mediator complex subunit 6                                          | Downregulated |
| A_33_P335 | 0.001565 | 0.000195 | -1.45 | CCDC69         | coiled-coil domain containing 69                                    | Downregulated |
| A_23_P395 | 0.001672 | 0.000218 | -1.45 | RSC1A1         | regulatory solute carrier protein, family 1, member 1               | Downregulated |
| A_33_P328 | 0.001922 | 0.000279 | -1.45 | COPS8          | COP9 signalosome subunit 8                                          | Downregulated |

|           |          |          |       |               |                                                                        |               |
|-----------|----------|----------|-------|---------------|------------------------------------------------------------------------|---------------|
| A_33_P329 | 0.001992 | 0.000298 | -1.45 | SLC12A8       | solute carrier family 12, member 8                                     | Downregulated |
| A_21_P000 | 0.00289  | 0.000536 | -1.45 | lnc-RAB11F1F  | lnc-RAB11FIP2-2:3                                                      | Downregulated |
| A_24_P329 | 0.003154 | 0.000614 | -1.45 | UBQLN1        | ubiquilin 1                                                            | Downregulated |
| A_33_P338 | 0.003189 | 0.000626 | -1.45 | POMGNT1       | protein O-linked mannose N-acetylglucosaminyltransferase 1 (beta 1,2-) | Downregulated |
| A_23_P540 | 0.003316 | 0.000664 | -1.45 | THTPA         | thiamine triphosphatase                                                | Downregulated |
| A_23_P893 | 0.003559 | 0.000736 | -1.45 | EPN2          | epsin 2                                                                | Downregulated |
| A_23_P319 | 0.003579 | 0.000744 | -1.45 | NR1I3         | nuclear receptor subfamily 1, group I, member 3                        | Downregulated |
| A_33_P328 | 0.003791 | 0.000807 | -1.45 | LOC1006531    | golgin subfamily A member 6-like protein 1-like                        | Downregulated |
| A_22_P000 | 0.00399  | 0.000871 | -1.45 | MED4-AS1      | MED4 antisense RNA 1                                                   | Downregulated |
| A_22_P000 | 0.004058 | 0.000891 | -1.45 | lnc-C9orf66-3 | lnc-C9orf66-3:1                                                        | Downregulated |
| A_23_P142 | 0.005696 | 0.00147  | -1.45 | PRPF31        | pre-mRNA processing factor 31                                          | Downregulated |
| A_23_P115 | 0.009857 | 0.00313  | -1.45 | FAM204A       | family with sequence similarity 204, member A                          | Downregulated |
| A_33_P332 | 0.010989 | 0.0036   | -1.45 | TTN           | titin                                                                  | Downregulated |
| A_33_P339 | 0.016381 | 0.00607  | -1.45 | BCL2L11       | BCL2-like 11 (apoptosis facilitator)                                   | Downregulated |
| A_21_P000 | 0.023517 | 0.00951  | -1.45 | lnc-MFSD8-2   | lnc-MFSD8-2:1                                                          | Downregulated |
| A_21_P000 | 0.026793 | 0.0112   | -1.45 | LOC1027237    | uncharacterized LOC102723765                                           | Downregulated |
| A_33_P324 | 0.039717 | 0.0182   | -1.45 | MAVS          | mitochondrial antiviral signaling protein                              | Downregulated |
| A_22_P000 | 0.039717 | 0.0182   | -1.45 | NRSN2-AS1     | NRSN2 antisense RNA 1                                                  | Downregulated |
| A_33_P327 | 0.041752 | 0.0193   | -1.45 | RAD1          | RAD1 checkpoint DNA exonuclease                                        | Downregulated |
| A_23_P281 | 0.001181 | 0.000115 | -1.46 | ARL6IP6       | ADP-ribosylation factor-like 6 interacting protein 6                   | Downregulated |
| A_24_P943 | 0.001543 | 0.000189 | -1.46 | NR1D2         | nuclear receptor subfamily 1, group D, member 2                        | Downregulated |
| A_22_P000 | 0.001691 | 0.000223 | -1.46 | LOC1019272    | uncharacterized LOC101927272                                           | Downregulated |
| A_23_P259 | 0.001706 | 0.000228 | -1.46 | THNSL2        | threonine synthase-like 2 (S. cerevisiae)                              | Downregulated |
| A_24_P917 | 0.001749 | 0.000236 | -1.46 | LOC284912     | uncharacterized LOC284912                                              | Downregulated |
| A_32_P216 | 0.002072 | 0.00032  | -1.46 | SPDYE3        | speedy/RINGO cell cycle regulator family member E3                     | Downregulated |
| A_23_P151 | 0.002302 | 0.000379 | -1.46 | UBFD1         | ubiquitin family domain containing 1                                   | Downregulated |
| A_33_P322 | 0.0025   | 0.00043  | -1.46 | MED15P9       | mediator complex subunit 15 pseudogene 9                               | Downregulated |
| A_23_P208 | 0.003074 | 0.000589 | -1.46 | MBOAT7        | membrane bound O-acyltransferase domain containing 7                   | Downregulated |
| A_22_P000 | 0.003267 | 0.000649 | -1.46 | lnc-NID1-3    | lnc-NID1-3:1                                                           | Downregulated |
| A_23_P376 | 0.006339 | 0.00171  | -1.46 | GOLGA8A       | golgin A8 family, member A                                             | Downregulated |
| A_23_P131 | 0.008293 | 0.00249  | -1.46 | C2orf81       | chromosome 2 open reading frame 81                                     | Downregulated |
| A_23_P753 | 0.00968  | 0.00306  | -1.46 | ARHGAP22      | Rho GTPase activating protein 22                                       | Downregulated |
| A_23_P129 | 0.033467 | 0.0147   | -1.46 | SDR42E1       | short chain dehydrogenase/reductase family 42E, member 1               | Downregulated |
| A_24_P410 | 0.043926 | 0.0205   | -1.46 | BCL2L13       | BCL2-like 13 (apoptosis facilitator)                                   | Downregulated |
| A_23_P120 | 0.001117 | 0.000103 | -1.47 | SP110         | SP110 nuclear body protein                                             | Downregulated |
| A_23_P870 | 0.001187 | 0.000116 | -1.47 | TAGLN         | transgelin                                                             | Downregulated |
| A_23_P428 | 0.001193 | 0.000117 | -1.47 | SND1          | staphylococcal nuclease and tudor domain containing 1                  | Downregulated |

|           |          |           |       |              |                                                              |               |
|-----------|----------|-----------|-------|--------------|--------------------------------------------------------------|---------------|
| A_24_P410 | 0.001341 | 0.000146  | -1.47 | RITA1        | RBPJ interacting and tubulin associated 1                    | Downregulated |
| A_32_P438 | 0.001394 | 0.000157  | -1.47 | DCUN1D4      | DCN1, defective in cullin neddylation 1, domain containing 4 | Downregulated |
| A_33_P336 | 0.001571 | 0.000196  | -1.47 | PTPRC        | protein tyrosine phosphatase, receptor type, C               | Downregulated |
| A_23_P108 | 0.001626 | 0.000208  | -1.47 | CREB3L3      | cAMP responsive element binding protein 3-like 3             | Downregulated |
| A_23_P502 | 0.001697 | 0.000225  | -1.47 | MRPL47       | mitochondrial ribosomal protein L47                          | Downregulated |
| A_23_P705 | 0.001778 | 0.000243  | -1.47 | HSPA1L       | heat shock 70kDa protein 1-like                              | Downregulated |
| A_23_P382 | 0.001955 | 0.000288  | -1.47 | PRPF8        | pre-mRNA processing factor 8                                 | Downregulated |
| A_23_P114 | 0.002238 | 0.000364  | -1.47 | MTPAP        | mitochondrial poly(A) polymerase                             | Downregulated |
| A_33_P338 | 0.002748 | 0.000496  | -1.47 | SHARPIN      | SHANK-associated RH domain interactor                        | Downregulated |
| A_23_P137 | 0.002984 | 0.000563  | -1.47 | CHI3L1       | chitinase 3-like 1 (cartilage glycoprotein-39)               | Downregulated |
| A_23_P418 | 0.00314  | 0.00061   | -1.47 | CARD6        | caspase recruitment domain family, member 6                  | Downregulated |
| A_33_P326 | 0.003157 | 0.000616  | -1.47 | ANKRD36B     | ankyrin repeat domain 36B                                    | Downregulated |
| A_33_P332 | 0.003529 | 0.000726  | -1.47 | IRF3         | interferon regulatory factor 3                               | Downregulated |
| A_23_P134 | 0.005519 | 0.0014    | -1.47 | PTCD1        | pentatricopeptide repeat domain 1                            | Downregulated |
| A_21_P001 | 0.007314 | 0.00209   | -1.47 | lnc-NBPF3-4  | lnc-NBPF3-4:1                                                | Downregulated |
| A_33_P324 | 0.009198 | 0.00286   | -1.47 | DNAJC11      | DnaJ (Hsp40) homolog, subfamily C, member 11                 | Downregulated |
| A_33_P321 | 0.022876 | 0.00918   | -1.47 | ANAPC16      | anaphase promoting complex subunit 16                        | Downregulated |
| A_22_P000 | 0.022876 | 0.00918   | -1.47 | lnc-CCNJL-1  | lnc-CCNJL-1:2                                                | Downregulated |
| A_33_P335 | 0.02543  | 0.0105    | -1.47 | ZBP1         | Z-DNA binding protein 1                                      | Downregulated |
| A_33_P334 | 0.053098 | 0.0258    | -1.47 | ZNF578       | zinc finger protein 578                                      | Downregulated |
| A_33_P340 | 0.084425 | 0.045     | -1.47 | SORBS2       | sorbin and SH3 domain containing 2                           | Downregulated |
| A_23_P157 | 0.001095 | 0.0000979 | -1.48 | PSMB6        | proteasome (prosome, macropain) subunit, beta type, 6        | Downregulated |
| A_21_P000 | 0.001379 | 0.000154  | -1.48 | lnc-MFAP4-4  | lnc-MFAP4-4:1                                                | Downregulated |
| A_23_P111 | 0.001474 | 0.000175  | -1.48 | PARP12       | poly (ADP-ribose) polymerase family, member 12               | Downregulated |
| A_24_P332 | 0.001816 | 0.000253  | -1.48 | GUSBP1       | glucuronidase, beta pseudogene 1                             | Downregulated |
| A_33_P323 | 0.001841 | 0.00026   | -1.48 | MIEF1        | mitochondrial elongation factor 1                            | Downregulated |
| A_21_P000 | 0.002943 | 0.00055   | -1.48 | lnc-SGCG-5   | lnc-SGCG-5:1                                                 | Downregulated |
| A_32_P219 | 0.00376  | 0.000798  | -1.48 | CENPJ        | centromere protein J                                         | Downregulated |
| A_33_P329 | 0.004843 | 0.00116   | -1.48 | NTM          | neurotrimin                                                  | Downregulated |
| A_33_P326 | 0.006501 | 0.00178   | -1.48 | DUS1L        | dihydrouridine synthase 1-like (S. cerevisiae)               | Downregulated |
| A_24_P914 | 0.008489 | 0.00256   | -1.48 | MEF2BNB      | MEF2B neighbor                                               | Downregulated |
| A_23_P206 | 0.008651 | 0.00263   | -1.48 | SEC14L1      | SEC14-like 1 (S. cerevisiae)                                 | Downregulated |
| A_33_P322 | 0.009425 | 0.00295   | -1.48 | RRBP1        | ribosome binding protein 1                                   | Downregulated |
| A_22_P000 | 0.015522 | 0.00566   | -1.48 | LOC1001287   | uncharacterized LOC100128714                                 | Downregulated |
| A_22_P000 | 0.015957 | 0.00586   | -1.48 | lnc-LEPRE1-1 | lnc-LEPRE1-1:1                                               | Downregulated |
| A_23_P855 | 0.046873 | 0.0222    | -1.48 | GPR52        | G protein-coupled receptor 52                                | Downregulated |
| A_23_P775 | 0.048094 | 0.0229    | -1.48 | VAC14        | Vac14 homolog (S. cerevisiae)                                | Downregulated |

|           |          |           |       |              |                                                                                    |               |
|-----------|----------|-----------|-------|--------------|------------------------------------------------------------------------------------|---------------|
| A_33_P331 | 0.001098 | 0.0000987 | -1.49 | UBAP2L       | ubiquitin associated protein 2-like                                                | Downregulated |
| A_23_P126 | 0.001146 | 0.000108  | -1.49 | SH3BGR13     | SH3 domain binding glutamate-rich protein like 3                                   | Downregulated |
| A_33_P655 | 0.001222 | 0.000123  | -1.49 | ZNF518A      | zinc finger protein 518A                                                           | Downregulated |
| A_23_P769 | 0.001316 | 0.000142  | -1.49 | SIPA1L1      | signal-induced proliferation-associated 1 like 1                                   | Downregulated |
| A_23_P623 | 0.001369 | 0.000151  | -1.49 | TAZ          | tafazzin                                                                           | Downregulated |
| A_23_P161 | 0.001479 | 0.000176  | -1.49 | ELK4         | ELK4, ETS-domain protein (SRF accessory protein 1)                                 | Downregulated |
| A_22_P000 | 0.001763 | 0.00024   | -1.49 | ANKRD36BP    | ankyrin repeat domain 36B pseudogene 2                                             | Downregulated |
| A_33_P382 | 0.002117 | 0.000332  | -1.49 | LINC00857    | long intergenic non-protein coding RNA 857                                         | Downregulated |
| A_23_P108 | 0.002338 | 0.000387  | -1.49 | CNOT11       | CCR4-NOT transcription complex, subunit 11                                         | Downregulated |
| A_22_P000 | 0.003346 | 0.000673  | -1.49 | lnc-COL9A1-1 | lnc-COL9A1-1:1                                                                     | Downregulated |
| A_24_P219 | 0.00339  | 0.000685  | -1.49 | PTOV1        | prostate tumor overexpressed 1                                                     | Downregulated |
| A_33_P329 | 0.004588 | 0.00107   | -1.49 | NFS1         | NFS1 cysteine desulfurase                                                          | Downregulated |
| A_23_P257 | 0.005067 | 0.00124   | -1.49 | MAPK1        | mitogen-activated protein kinase 1                                                 | Downregulated |
| A_33_P330 | 0.006173 | 0.00165   | -1.49 | PIDD1        | p53-induced death domain protein 1                                                 | Downregulated |
| A_23_P139 | 0.006941 | 0.00195   | -1.49 | CHST11       | carbohydrate (chondroitin 4) sulfotransferase 11                                   | Downregulated |
| A_23_P671 | 0.007077 | 0.002     | -1.49 | PIN1         | peptidylprolyl cis/trans isomerase, NIMA-interacting 1                             | Downregulated |
| A_23_P909 | 0.010039 | 0.00321   | -1.49 | IL36B        | interleukin 36, beta                                                               | Downregulated |
| A_24_P207 | 0.012808 | 0.0044    | -1.49 | UBE3A        | ubiquitin protein ligase E3A                                                       | Downregulated |
| A_22_P000 | 0.015153 | 0.00549   | -1.49 | LINC00461    | long intergenic non-protein coding RNA 461                                         | Downregulated |
| A_21_P000 | 0.02252  | 0.009     | -1.49 | lnc-ARID2-3  | lnc-ARID2-3:1                                                                      | Downregulated |
| A_23_P165 | 0.02549  | 0.0105    | -1.49 | MPV17L2      | MPV17 mitochondrial membrane protein-like 2                                        | Downregulated |
| A_33_P321 | 0.041895 | 0.0194    | -1.49 | JPH4         | junctophilin 4                                                                     | Downregulated |
| A_24_P114 | 0.046941 | 0.0223    | -1.49 | MBOAT2       | membrane bound O-acyltransferase domain containing 2                               | Downregulated |
| A_33_P334 | 0.05145  | 0.0248    | -1.49 | EXOSC2       | exosome component 2                                                                | Downregulated |
| A_33_P337 | 0.001065 | 0.0000919 | -1.5  | SH3YL1       | SH3 and SYLF domain containing 1                                                   | Downregulated |
| A_22_P000 | 0.00109  | 0.0000971 | -1.5  | lnc-NBPF3-4  | lnc-NBPF3-4:1                                                                      | Downregulated |
| A_33_P338 | 0.001145 | 0.000108  | -1.5  | C19orf54     | chromosome 19 open reading frame 54                                                | Downregulated |
| A_24_P245 | 0.001165 | 0.000112  | -1.5  | ATP5A1       | ATP synthase, H <sup>+</sup> transporting, mitochondrial F1 complex, alpha subunit | Downregulated |
| A_24_P245 | 0.001266 | 0.000133  | -1.5  | USP7         | ubiquitin specific peptidase 7 (herpes virus-associated)                           | Downregulated |
| A_23_P128 | 0.001393 | 0.000156  | -1.5  | PSTK         | phosphoserine-tRNA kinase                                                          | Downregulated |
| A_23_P130 | 0.001626 | 0.000208  | -1.5  | MOB3A        | MOB kinase activator 3A                                                            | Downregulated |
| A_21_P000 | 0.001817 | 0.000254  | -1.5  | lnc-GABRB3-  | lnc-GABRB3-1:1                                                                     | Downregulated |
| A_22_P000 | 0.002137 | 0.000339  | -1.5  | lnc-GLS-2    | lnc-GLS-2:2                                                                        | Downregulated |
| A_33_P338 | 0.004759 | 0.00113   | -1.5  | PXN          | paxillin                                                                           | Downregulated |
| A_22_P000 | 0.006123 | 0.00163   | -1.5  | lnc-MAPK6-9  | lnc-MAPK6-9:1                                                                      | Downregulated |
| A_23_P123 | 0.006795 | 0.00189   | -1.5  | APH1A        | APH1A gamma secretase subunit                                                      | Downregulated |
| A_23_P150 | 0.006955 | 0.00195   | -1.5  | SEPHS1       | selenophosphate synthetase 1                                                       | Downregulated |

|           |          |           |       |                |                                                                        |               |
|-----------|----------|-----------|-------|----------------|------------------------------------------------------------------------|---------------|
| A_21_P001 | 0.027632 | 0.0117    | -1.5  | XLOC_I2_009811 |                                                                        | Downregulated |
| A_33_P339 | 0.037331 | 0.0169    | -1.5  | RIT1           | Ras-like without CAAX 1                                                | Downregulated |
| A_33_P341 | 0.058429 | 0.0289    | -1.5  | ABI3BP         | ABI family, member 3 (NESH) binding protein                            | Downregulated |
| A_23_P209 | 0.0011   | 0.0000992 | -1.51 | PSMD1          | proteasome (prosome, macropain) 26S subunit, non-ATPase, 1             | Downregulated |
| A_22_P000 | 0.001122 | 0.000104  | -1.51 | lnc-GPR126-1   | lnc-GPR126-1:1                                                         | Downregulated |
| A_33_P327 | 0.001382 | 0.000154  | -1.51 | IFNAR1         | interferon (alpha, beta and omega) receptor 1                          | Downregulated |
| A_23_P214 | 0.001475 | 0.000175  | -1.51 | PBX2           | pre-B-cell leukemia homeobox 2                                         | Downregulated |
| A_33_P335 | 0.001477 | 0.000175  | -1.51 | PVRIG          | poliovirus receptor related immunoglobulin domain containing           | Downregulated |
| A_24_P398 | 0.001653 | 0.000214  | -1.51 | RGP1           | RGP1 retrograde golgi transport homolog (S. cerevisiae)                | Downregulated |
| A_22_P000 | 0.001678 | 0.000219  | -1.51 | lnc-FAM211A    | lnc-FAM211A-2:1                                                        | Downregulated |
| A_21_P000 | 0.001815 | 0.000253  | -1.51 | ZNF726         | zinc finger protein 726                                                | Downregulated |
| A_24_P345 | 0.002426 | 0.000409  | -1.51 | CYBRD1         | cytochrome b reductase 1                                               | Downregulated |
| A_23_P346 | 0.003631 | 0.000758  | -1.51 | CACNA2D2       | calcium channel, voltage-dependent, alpha 2/delta subunit 2            | Downregulated |
| A_23_P376 | 0.004602 | 0.00108   | -1.51 | NIT1           | nitrilase 1                                                            | Downregulated |
| A_23_P389 | 0.007273 | 0.00207   | -1.51 | VAV1           | vav 1 guanine nucleotide exchange factor                               | Downregulated |
| A_23_P943 | 0.007332 | 0.0021    | -1.51 | TSTA3          | tissue specific transplantation antigen P35B                           | Downregulated |
| A_23_P705 | 0.008165 | 0.00243   | -1.51 | SDAD1          | SDA1 domain containing 1                                               | Downregulated |
| A_23_P155 | 0.015831 | 0.0058    | -1.51 | NAAA           | N-acylethanolamine acid amidase                                        | Downregulated |
| A_22_P000 | 0.016042 | 0.0059    | -1.51 | lnc-BARHL2-3   | lnc-BARHL2-3:1                                                         | Downregulated |
| A_23_P501 | 0.0168   | 0.00627   | -1.51 | CSRP2BP        | CSRP2 binding protein                                                  | Downregulated |
| A_21_P000 | 0.03265  | 0.0143    | -1.51 | lnc-PFKP-8     | lnc-PFKP-8:1                                                           | Downregulated |
| A_23_P144 | 0.001054 | 0.0000892 | -1.52 | CAMK2D         | calcium/calmodulin-dependent protein kinase II delta                   | Downregulated |
| A_23_P486 | 0.001086 | 0.0000961 | -1.52 | TMEM55B        | transmembrane protein 55B                                              | Downregulated |
| A_23_P693 | 0.001117 | 0.000103  | -1.52 | PARP9          | poly (ADP-ribose) polymerase family, member 9                          | Downregulated |
| A_23_P206 | 0.001258 | 0.000131  | -1.52 | NIPSNAP3A      | nipsnap homolog 3A (C. elegans)                                        | Downregulated |
| A_24_P384 | 0.001291 | 0.000137  | -1.52 | EWSR1          | EWS RNA-binding protein 1                                              | Downregulated |
| A_23_P834 | 0.001405 | 0.00016   | -1.52 | SMARCC1        | SWI/SNF related, matrix associated, actin dependent regulator of chrom | Downregulated |
| A_23_P533 | 0.001916 | 0.000278  | -1.52 | XRCC6BP1       | XRCC6 binding protein 1                                                | Downregulated |
| A_23_P428 | 0.002237 | 0.000363  | -1.52 | PDIA4          | protein disulfide isomerase family A, member 4                         | Downregulated |
| A_21_P000 | 0.00284  | 0.000522  | -1.52 | lnc-MKI67IP-1  | lnc-MKI67IP-1:3                                                        | Downregulated |
| A_23_P124 | 0.002907 | 0.000541  | -1.52 | DEAF1          | DEAF1 transcription factor                                             | Downregulated |
| A_23_P743 | 0.003187 | 0.000626  | -1.52 | OPN3           | opsin 3                                                                | Downregulated |
| A_22_P000 | 0.00353  | 0.000726  | -1.52 | MANEA-AS1      | MANEA antisense RNA 1 (head to head)                                   | Downregulated |
| A_33_P331 | 0.003646 | 0.000762  | -1.52 | IMMT           | inner membrane protein, mitochondrial                                  | Downregulated |
| A_24_P174 | 0.003936 | 0.000853  | -1.52 | NNT            | nicotinamide nucleotide transhydrogenase                               | Downregulated |
| A_24_P184 | 0.004114 | 0.000909  | -1.52 | PXN            | paxillin                                                               | Downregulated |
| A_23_P122 | 0.004206 | 0.000941  | -1.52 | ELMO1          | engulfment and cell motility 1                                         | Downregulated |

|           |          |           |       |                |                                                                      |               |
|-----------|----------|-----------|-------|----------------|----------------------------------------------------------------------|---------------|
| A_21_P001 | 0.006614 | 0.00182   | -1.52 | AMZ2P1         | archaelysin family metallopeptidase 2 pseudogene 1                   | Downregulated |
| A_23_P345 | 0.00833  | 0.0025    | -1.52 | TICRR          | TOPBP1-interacting checkpoint and replication regulator              | Downregulated |
| A_33_P323 | 0.00833  | 0.0025    | -1.52 | TRIM45         | tripartite motif containing 45                                       | Downregulated |
| A_23_P132 | 0.008661 | 0.00264   | -1.52 | C22orf46       | chromosome 22 open reading frame 46                                  | Downregulated |
| A_21_P001 | 0.015108 | 0.00547   | -1.52 | XLOC_I2_005020 |                                                                      | Downregulated |
| A_22_P000 | 0.018211 | 0.00693   | -1.52 | lnc-ATF7IP2-2  | lnc-ATF7IP2-2:1                                                      | Downregulated |
| A_21_P000 | 0.021294 | 0.00839   | -1.52 | HDHD1          | haloacid dehalogenase-like hydrolase domain containing 1             | Downregulated |
| A_21_P000 | 0.024515 | 0.01      | -1.52 | SNORA60        | small nucleolar RNA, H/ACA box 60                                    | Downregulated |
| A_19_P003 | 0.044371 | 0.0208    | -1.52 | LOC1019280     | uncharacterized LOC101928004                                         | Downregulated |
| A_33_P323 | 0.058458 | 0.0289    | -1.52 | ATXN3L         | ataxin 3-like                                                        | Downregulated |
| A_24_P253 | 0.001067 | 0.0000928 | -1.53 | EMG1           | EMG1 N1-specific pseudouridine methyltransferase                     | Downregulated |
| A_23_P256 | 0.001097 | 0.0000983 | -1.53 | TSSC1          | tumor suppressing subtransferable candidate 1                        | Downregulated |
| A_23_P159 | 0.0011   | 0.000099  | -1.53 | COX7B          | cytochrome c oxidase subunit VIIb                                    | Downregulated |
| A_33_P332 | 0.001295 | 0.000138  | -1.53 | CDK13          | cyclin-dependent kinase 13                                           | Downregulated |
| A_33_P326 | 0.001443 | 0.000167  | -1.53 | RASA3          | RAS p21 protein activator 3                                          | Downregulated |
| A_23_P488 | 0.001492 | 0.000179  | -1.53 | KIF23          | kinesin family member 23                                             | Downregulated |
| A_24_P149 | 0.001791 | 0.000246  | -1.53 | ZBTB43         | zinc finger and BTB domain containing 43                             | Downregulated |
| A_21_P001 | 0.001863 | 0.000265  | -1.53 | LINC00665      | long intergenic non-protein coding RNA 665                           | Downregulated |
| A_22_P000 | 0.002029 | 0.000309  | -1.53 | lnc-ABCC3-1    | lnc-ABCC3-1:1                                                        | Downregulated |
| A_23_P205 | 0.002364 | 0.000394  | -1.53 | ANKRD10        | ankyrin repeat domain 10                                             | Downregulated |
| A_23_P215 | 0.002794 | 0.000508  | -1.53 | NUB1           | negative regulator of ubiquitin-like proteins 1                      | Downregulated |
| A_23_P283 | 0.003171 | 0.000621  | -1.53 | GMCL1          | germ cell-less, spermatogenesis associated 1                         | Downregulated |
| A_22_P000 | 0.003193 | 0.000628  | -1.53 | lnc-RP11-728   | lnc-RP11-728F11.4.1-1:3                                              | Downregulated |
| A_23_P333 | 0.004094 | 0.000902  | -1.53 | NEK3           | NIMA-related kinase 3                                                | Downregulated |
| A_19_P008 | 0.005715 | 0.00148   | -1.53 | XLOC_I2_010511 |                                                                      | Downregulated |
| A_24_P184 | 0.006166 | 0.00165   | -1.53 | LRTOMT         | leucine rich transmembrane and O-methyltransferase domain containing | Downregulated |
| A_23_P103 | 0.006203 | 0.00166   | -1.53 | AGMAT          | agmatine ureohydrolase (agmatinase)                                  | Downregulated |
| A_23_P957 | 0.006202 | 0.00166   | -1.53 | ITLN1          | intelectin 1 (galactofuranose binding)                               | Downregulated |
| A_22_P000 | 0.00833  | 0.0025    | -1.53 | lnc-WDR45L-2   | lnc-WDR45L-2:1                                                       | Downregulated |
| A_33_P329 | 0.008991 | 0.00277   | -1.53 | lnc-MLL3-1     | lnc-MLL3-1:1                                                         | Downregulated |
| A_24_P178 | 0.011221 | 0.00371   | -1.53 | PHLDB2         | pleckstrin homology-like domain, family B, member 2                  | Downregulated |
| A_33_P336 | 0.019258 | 0.00743   | -1.53 | LBH            | limb bud and heart development                                       | Downregulated |
| A_22_P000 | 0.021061 | 0.00828   | -1.53 | NEURL4         | neuralized E3 ubiquitin protein ligase 4                             | Downregulated |
| A_21_P000 | 0.021697 | 0.00859   | -1.53 | LINC01482      | long intergenic non-protein coding RNA 1482                          | Downregulated |
| A_23_P115 | 0.03678  | 0.0166    | -1.53 | FCRL4          | Fc receptor-like 4                                                   | Downregulated |
| A_33_P334 | 0.001014 | 0.0000822 | -1.54 | ATG2B          | autophagy related 2B                                                 | Downregulated |
| A_22_P000 | 0.001092 | 0.0000973 | -1.54 | lnc-RAB30-1    | lnc-RAB30-1:1                                                        | Downregulated |



|           |          |           |       |                |                                                                          |               |
|-----------|----------|-----------|-------|----------------|--------------------------------------------------------------------------|---------------|
| A_33_P335 | 0.001098 | 0.0000985 | -1.54 | BTLA           | B and T lymphocyte associated                                            | Downregulated |
| A_33_P329 | 0.001443 | 0.000168  | -1.54 | LUC7L3         | LUC7-like 3 (S. cerevisiae)                                              | Downregulated |
| A_23_P336 | 0.001458 | 0.000172  | -1.54 | GLCCI1         | glucocorticoid induced transcript 1                                      | Downregulated |
| A_21_P000 | 0.001817 | 0.000254  | -1.54 | lnc-LRP1B-4    | lnc-LRP1B-4:1                                                            | Downregulated |
| A_22_P000 | 0.001899 | 0.000273  | -1.54 | lnc-SUPT6H-1   | lnc-SUPT6H-1:1                                                           | Downregulated |
| A_19_P003 | 0.001953 | 0.000287  | -1.54 | PVT1           | Pvt1 oncogene (non-protein coding)                                       | Downregulated |
| A_23_P363 | 0.002112 | 0.00033   | -1.54 | ATG16L2        | autophagy related 16-like 2 (S. cerevisiae)                              | Downregulated |
| A_23_P385 | 0.003497 | 0.000716  | -1.54 | KRT16          | keratin 16, type I                                                       | Downregulated |
| A_33_P341 | 0.009988 | 0.00319   | -1.54 | ZNF407         | zinc finger protein 407                                                  | Downregulated |
| A_33_P326 | 0.02063  | 0.00807   | -1.54 | GAPVD1         | GTPase activating protein and VPS9 domains 1                             | Downregulated |
| A_21_P001 | 0.0282   | 0.012     | -1.54 | XLOC_I2_001086 |                                                                          | Downregulated |
| A_22_P000 | 0.047843 | 0.0228    | -1.54 | RGS5           | regulator of G-protein signaling 5                                       | Downregulated |
| A_21_P001 | 0.051179 | 0.0247    | -1.54 | LOC1019306     | uncharacterized LOC101930634                                             | Downregulated |
| A_23_P334 | 0.001021 | 0.0000834 | -1.55 | CRELD2         | cysteine-rich with EGF-like domains 2                                    | Downregulated |
| A_23_P413 | 0.001306 | 0.00014   | -1.55 | PREX1          | phosphatidylinositol-3,4,5-trisphosphate-dependent Rac exchange factor 1 | Downregulated |
| A_23_P128 | 0.001465 | 0.000173  | -1.55 | ARG2           | arginase 2                                                               | Downregulated |
| A_33_P340 | 0.001478 | 0.000176  | -1.55 | TIMM23         | translocase of inner mitochondrial membrane 23 homolog (yeast)           | Downregulated |
| A_24_P419 | 0.001486 | 0.000178  | -1.55 | BICD2          | bicaudal D homolog 2 (Drosophila)                                        | Downregulated |
| A_32_P221 | 0.001486 | 0.000178  | -1.55 | HIST1H2AM      | histone cluster 1, H2am                                                  | Downregulated |
| A_23_P121 | 0.001808 | 0.000251  | -1.55 | TMEM43         | transmembrane protein 43                                                 | Downregulated |
| A_33_P327 | 0.001848 | 0.000261  | -1.55 | RIPK1          | receptor (TNFRSF)-interacting serine-threonine kinase 1                  | Downregulated |
| A_22_P000 | 0.002008 | 0.000303  | -1.55 | lnc-STRA8-1    | lnc-STRA8-1:1                                                            | Downregulated |
| A_23_P951 | 0.002163 | 0.000344  | -1.55 | SLC37A3        | solute carrier family 37, member 3                                       | Downregulated |
| A_33_P321 | 0.002476 | 0.000422  | -1.55 | EMR1           | egf-like module containing, mucin-like, hormone receptor-like 1          | Downregulated |
| A_22_P000 | 0.002572 | 0.00045   | -1.55 | LGALS17A       | Charcot-Leyden crystal protein pseudogene                                | Downregulated |
| A_23_P149 | 0.003536 | 0.000729  | -1.55 | ABHD12         | abhydrolase domain containing 12                                         | Downregulated |
| A_23_P141 | 0.004135 | 0.000916  | -1.55 | CXXC1          | CXXC finger protein 1                                                    | Downregulated |
| A_23_P129 | 0.009311 | 0.0029    | -1.55 | PALB2          | partner and localizer of BRCA2                                           | Downregulated |
| A_22_P000 | 0.009571 | 0.00301   | -1.55 | lnc-GGCT-1     | lnc-GGCT-1:3                                                             | Downregulated |
| A_24_P425 | 0.014665 | 0.00526   | -1.55 | ACOT9          | acyl-CoA thioesterase 9                                                  | Downregulated |
| A_22_P000 | 0.016175 | 0.00597   | -1.55 | lnc-RP11-43D   | lnc-RP11-43D2.2.1-4:1                                                    | Downregulated |
| A_33_P330 | 0.02566  | 0.0106    | -1.55 | ZGLP1          | zinc finger, GATA-like protein 1                                         | Downregulated |
| A_23_P603 | 0.000995 | 0.0000781 | -1.56 | UBAC1          | UBA domain containing 1                                                  | Downregulated |
| A_22_P000 | 0.001157 | 0.00011   | -1.56 | PLCG2          | phospholipase C, gamma 2 (phosphatidylinositol-specific)                 | Downregulated |
| A_24_P148 | 0.001295 | 0.000137  | -1.56 | MST1           | macrophage stimulating 1 (hepatocyte growth factor-like)                 | Downregulated |
| A_33_P322 | 0.001445 | 0.000168  | -1.56 | PTRH1          | peptidyl-tRNA hydrolase 1 homolog (S. cerevisiae)                        | Downregulated |
| A_21_P000 | 0.001771 | 0.000242  | -1.56 | lnc-ADAMTS7    | lnc-ADAMTS7-1:1                                                          | Downregulated |

|           |          |           |       |             |                                                                    |               |
|-----------|----------|-----------|-------|-------------|--------------------------------------------------------------------|---------------|
| A_21_P001 | 0.002077 | 0.000321  | -1.56 | LOC1005074  | uncharacterized LOC100507487                                       | Downregulated |
| A_23_P714 | 0.002207 | 0.000355  | -1.56 | UBE2W       | ubiquitin-conjugating enzyme E2W (putative)                        | Downregulated |
| A_33_P330 | 0.00247  | 0.00042   | -1.56 | VWA5A       | von Willebrand factor A domain containing 5A                       | Downregulated |
| A_33_P330 | 0.002651 | 0.00047   | -1.56 | KMT2A       | lysine (K)-specific methyltransferase 2A                           | Downregulated |
| A_23_P146 | 0.003126 | 0.000606  | -1.56 | STX8        | syntaxin 8                                                         | Downregulated |
| A_23_P381 | 0.003164 | 0.000618  | -1.56 | CCDC74B     | coiled-coil domain containing 74B                                  | Downregulated |
| A_23_P125 | 0.003686 | 0.000775  | -1.56 | CASP7       | caspase 7, apoptosis-related cysteine peptidase                    | Downregulated |
| A_21_P000 | 0.004039 | 0.000885  | -1.56 | GOLGA2P5    | golgin A2 pseudogene 5                                             | Downregulated |
| A_33_P333 | 0.004356 | 0.000995  | -1.56 | LOC1027252  | chondroitin sulfate proteoglycan 4-like                            | Downregulated |
| A_23_P319 | 0.005643 | 0.00145   | -1.56 | EYA2        | EYA transcriptional coactivator and phosphatase 2                  | Downregulated |
| A_23_P115 | 0.005735 | 0.00148   | -1.56 | PCGF6       | polycomb group ring finger 6                                       | Downregulated |
| A_23_P150 | 0.007125 | 0.00202   | -1.56 | SUOX        | sulfite oxidase                                                    | Downregulated |
| A_33_P321 | 0.007348 | 0.0021    | -1.56 | LOC149373   | uncharacterized LOC149373                                          | Downregulated |
| A_24_P143 | 0.01223  | 0.00415   | -1.56 | FAM109A     | family with sequence similarity 109, member A                      | Downregulated |
| A_22_P000 | 0.023558 | 0.00953   | -1.56 | lnc-MPHOSP1 | lnc-MPHOSP8-3:1                                                    | Downregulated |
| A_23_P200 | 0.029816 | 0.0128    | -1.56 | NTPCR       | nucleoside-triphosphatase, cancer-related                          | Downregulated |
| A_23_P442 | 0.03225  | 0.0141    | -1.56 | FLII        | flightless I homolog (Drosophila)                                  | Downregulated |
| A_24_P749 | 0.000987 | 0.0000765 | -1.57 | PLP2        | proteolipid protein 2 (colonic epithelium-enriched)                | Downregulated |
| A_23_P553 | 0.001078 | 0.0000947 | -1.57 | KANSL1      | KAT8 regulatory NSL complex subunit 1                              | Downregulated |
| A_23_P388 | 0.001088 | 0.0000968 | -1.57 | RABAC1      | Rab acceptor 1 (prenylated)                                        | Downregulated |
| A_24_P392 | 0.001092 | 0.0000975 | -1.57 | TRPM3       | transient receptor potential cation channel, subfamily M, member 3 | Downregulated |
| A_21_P001 | 0.001097 | 0.0000983 | -1.57 | STAU2       | staufen double-stranded RNA binding protein 2                      | Downregulated |
| A_33_P330 | 0.001107 | 0.000101  | -1.57 | GOLGA2      | golgin A2                                                          | Downregulated |
| A_23_P151 | 0.001154 | 0.00011   | -1.57 | MYCBP2      | MYC binding protein 2, E3 ubiquitin protein ligase                 | Downregulated |
| A_22_P000 | 0.00126  | 0.000131  | -1.57 | lnc-WDR67-1 | lnc-WDR67-1:1                                                      | Downregulated |
| A_33_P323 | 0.001275 | 0.000134  | -1.57 | UBL4A       | ubiquitin-like 4A                                                  | Downregulated |
| A_33_P340 | 0.001404 | 0.00016   | -1.57 | STPG1       | sperm-tail PG-rich repeat containing 1                             | Downregulated |
| A_24_P769 | 0.001597 | 0.000201  | -1.57 | C12orf73    | chromosome 12 open reading frame 73                                | Downregulated |
| A_24_P324 | 0.001694 | 0.000224  | -1.57 | KCTD2       | potassium channel tetramerization domain containing 2              | Downregulated |
| A_24_P454 | 0.001821 | 0.000255  | -1.57 | SLAMF6      | SLAM family member 6                                               | Downregulated |
| A_23_P143 | 0.00189  | 0.000271  | -1.57 | PISD        | phosphatidylserine decarboxylase                                   | Downregulated |
| A_23_P802 | 0.00239  | 0.000401  | -1.57 | SFI1        | Sfi1 homolog, spindle assembly associated (yeast)                  | Downregulated |
| A_23_P522 | 0.003012 | 0.000572  | -1.57 | ERLIN1      | ER lipid raft associated 1                                         | Downregulated |
| A_24_P753 | 0.004163 | 0.000927  | -1.57 | GAS2L1P2    | growth arrest-specific 2 like 1 pseudogene 2                       | Downregulated |
| A_24_P978 | 0.004862 | 0.00117   | -1.57 | CCDC69      | coiled-coil domain containing 69                                   | Downregulated |
| A_23_P312 | 0.00758  | 0.0022    | -1.57 | GAL3ST4     | galactose-3-O-sulfotransferase 4                                   | Downregulated |
| A_33_P332 | 0.009447 | 0.00296   | -1.57 | ADCY2       | adenylate cyclase 2 (brain)                                        | Downregulated |

|           |          |           |       |               |                                                        |               |
|-----------|----------|-----------|-------|---------------|--------------------------------------------------------|---------------|
| A_23_P206 | 0.014296 | 0.00508   | -1.57 | NQO1          | NAD(P)H dehydrogenase, quinone 1                       | Downregulated |
| A_22_P000 | 0.019849 | 0.0077    | -1.57 | lnc-LBR-1     | lnc-LBR-1:3                                            | Downregulated |
| A_22_P000 | 0.029816 | 0.0128    | -1.57 | EIF1AX-AS1    | EIF1AX antisense RNA 1                                 | Downregulated |
| A_22_P000 | 0.029816 | 0.0128    | -1.57 | LINC01265     | long intergenic non-protein coding RNA 1265            | Downregulated |
| A_24_P484 | 0.000991 | 0.0000773 | -1.58 | YES1          | YES proto-oncogene 1, Src family tyrosine kinase       | Downregulated |
| A_33_P340 | 0.001049 | 0.0000885 | -1.58 | MROH1         | maestro heat-like repeat family member 1               | Downregulated |
| A_23_P151 | 0.001066 | 0.0000922 | -1.58 | ARHGDI3       | Rho GDP dissociation inhibitor (GDI) beta              | Downregulated |
| A_22_P000 | 0.001181 | 0.000115  | -1.58 | LOC1027247    | uncharacterized LOC102724715                           | Downregulated |
| A_21_P000 | 0.00121  | 0.000121  | -1.58 | LOC1019295    | uncharacterized LOC101929531                           | Downregulated |
| A_23_P103 | 0.001448 | 0.000169  | -1.58 | FGR           | FGR proto-oncogene, Src family tyrosine kinase         | Downregulated |
| A_33_P326 | 0.001464 | 0.000173  | -1.58 | ANKRD52       | ankyrin repeat domain 52                               | Downregulated |
| A_23_P123 | 0.001481 | 0.000177  | -1.58 | IDNK          | idnK, gluconokinase homolog (E. coli)                  | Downregulated |
| A_24_P981 | 0.001977 | 0.000294  | -1.58 | SNX10         | sorting nexin 10                                       | Downregulated |
| A_33_P330 | 0.002341 | 0.000388  | -1.58 | TMEM110       | transmembrane protein 110                              | Downregulated |
| A_24_P605 | 0.002517 | 0.000434  | -1.58 | PGGT1B        | protein geranylgeranyltransferase type I, beta subunit | Downregulated |
| A_22_P000 | 0.002989 | 0.000564  | -1.58 | lnc-CCT4-1    | lnc-CCT4-1:1                                           | Downregulated |
| A_32_P216 | 0.003094 | 0.000596  | -1.58 | LDLRAP1       | low density lipoprotein receptor adaptor protein 1     | Downregulated |
| A_23_P103 | 0.003875 | 0.000835  | -1.58 | FCRL3         | Fc receptor-like 3                                     | Downregulated |
| A_23_P115 | 0.005162 | 0.00127   | -1.58 | ZZZ3          | zinc finger, ZZ-type containing 3                      | Downregulated |
| A_33_P322 | 0.005837 | 0.00152   | -1.58 | TRAPPC13      | trafficking protein particle complex 13                | Downregulated |
| A_22_P000 | 0.035323 | 0.0158    | -1.58 | LOC1019294    | uncharacterized LOC101929425                           | Downregulated |
| A_32_P189 | 0.036007 | 0.0161    | -1.58 | USHBP1        | Usher syndrome 1C binding protein 1                    | Downregulated |
| A_33_P324 | 0.042851 | 0.0199    | -1.58 | SLMAP         | sarcolemma associated protein                          | Downregulated |
| A_33_P332 | 0.001134 | 0.000106  | -1.59 | TBC1D10C      | TBC1 domain family, member 10C                         | Downregulated |
| A_24_P363 | 0.001237 | 0.000126  | -1.59 | C5orf45       | chromosome 5 open reading frame 45                     | Downregulated |
| A_21_P000 | 0.001596 | 0.0002    | -1.59 | lnc-DHRS2-3   | lnc-DHRS2-3:1                                          | Downregulated |
| A_33_P339 | 0.001606 | 0.000203  | -1.59 | USP39         | ubiquitin specific peptidase 39                        | Downregulated |
| A_24_P356 | 0.002027 | 0.000308  | -1.59 | HEXIM1        | hexamethylene bis-acetamide inducible 1                | Downregulated |
| A_22_P000 | 0.002041 | 0.000312  | -1.59 | lnc-C17orf66- | lnc-C17orf66-1:1                                       | Downregulated |
| A_33_P321 | 0.002544 | 0.000441  | -1.59 | ENTPD1        | ectonucleoside triphosphate diphosphohydrolase 1       | Downregulated |
| A_24_P557 | 0.003009 | 0.000571  | -1.59 | XAF1          | XIAP associated factor 1                               | Downregulated |
| A_24_P954 | 0.005795 | 0.00151   | -1.59 | CARS          | cysteinyl-tRNA synthetase                              | Downregulated |
| A_22_P000 | 0.008069 | 0.00239   | -1.59 | LOC1019276    | uncharacterized LOC101927620                           | Downregulated |
| A_21_P000 | 0.013155 | 0.00455   | -1.59 | lnc-BOD1-2    | lnc-BOD1-2:9                                           | Downregulated |
| A_22_P000 | 0.016097 | 0.00593   | -1.59 | lnc-LRRC40-1  | lnc-LRRC40-1:1                                         | Downregulated |
| A_23_P395 | 0.028344 | 0.012     | -1.59 | ZFP42         | ZFP42 zinc finger protein                              | Downregulated |
| A_23_P939 | 0.035934 | 0.0161    | -1.59 | ARHGEF5       | Rho guanine nucleotide exchange factor (GEF) 5         | Downregulated |

|           |          |           |       |              |                                                                             |               |
|-----------|----------|-----------|-------|--------------|-----------------------------------------------------------------------------|---------------|
| A_24_P203 | 0.038648 | 0.0176    | -1.59 | SLC1A7       | solute carrier family 1 (glutamate transporter), member 7                   | Downregulated |
| A_22_P000 | 0.000979 | 0.0000755 | -1.6  | TUG1         | taurine up-regulated 1 (non-protein coding)                                 | Downregulated |
| A_23_P478 | 0.001054 | 0.0000894 | -1.6  | TM7SF3       | transmembrane 7 superfamily member 3                                        | Downregulated |
| A_22_P000 | 0.001067 | 0.0000927 | -1.6  | SASH3        | SAM and SH3 domain containing 3                                             | Downregulated |
| A_33_P328 | 0.001179 | 0.000115  | -1.6  | S1PR4        | sphingosine-1-phosphate receptor 4                                          | Downregulated |
| A_21_P001 | 0.001193 | 0.000117  | -1.6  | FCRL5        | Fc receptor-like 5                                                          | Downregulated |
| A_33_P340 | 0.001196 | 0.000118  | -1.6  | FCGR2C       | Fc fragment of IgG, low affinity IIc, receptor for (CD32) (gene/pseudogene) | Downregulated |
| A_33_P347 | 0.001479 | 0.000176  | -1.6  | PPP1R11      | protein phosphatase 1, regulatory (inhibitor) subunit 11                    | Downregulated |
| A_23_P138 | 0.001821 | 0.000254  | -1.6  | FAIM3        | Fas apoptotic inhibitory molecule 3                                         | Downregulated |
| A_32_P162 | 0.002102 | 0.000328  | -1.6  | TAB3         | TGF-beta activated kinase 1/MAP3K7 binding protein 3                        | Downregulated |
| A_23_P212 | 0.002291 | 0.000377  | -1.6  | SHISA5       | shisa family member 5                                                       | Downregulated |
| A_23_P144 | 0.002469 | 0.00042   | -1.6  | GNPDA2       | glucosamine-6-phosphate deaminase 2                                         | Downregulated |
| A_22_P000 | 0.002944 | 0.00055   | -1.6  | lnc-TSPYL4-1 | lnc-TSPYL4-1:1                                                              | Downregulated |
| A_33_P329 | 0.004951 | 0.00119   | -1.6  | FCRLB        | Fc receptor-like B                                                          | Downregulated |
| A_24_P414 | 0.005502 | 0.0014    | -1.6  | PPP3CA       | protein phosphatase 3, catalytic subunit, alpha isozyme                     | Downregulated |
| A_23_P105 | 0.006921 | 0.00194   | -1.6  | METRNL       | meteorin, glial cell differentiation regulator-like                         | Downregulated |
| A_24_P179 | 0.008581 | 0.0026    | -1.6  | WDR66        | WD repeat domain 66                                                         | Downregulated |
| A_33_P327 | 0.010612 | 0.00345   | -1.6  | ELOVL5       | ELOVL fatty acid elongase 5                                                 | Downregulated |
| A_21_P001 | 0.020467 | 0.008     | -1.6  | LOC1005074   | uncharacterized LOC100507487                                                | Downregulated |
| A_23_P252 | 0.038752 | 0.0177    | -1.6  | COMMD10      | COMM domain containing 10                                                   | Downregulated |
| A_23_P357 | 0.00096  | 0.0000717 | -1.61 | MBNL1        | muscleblind-like splicing regulator 1                                       | Downregulated |
| A_23_P423 | 0.001005 | 0.0000807 | -1.61 | HLA-DMA      | major histocompatibility complex, class II, DM alpha                        | Downregulated |
| A_33_P329 | 0.001065 | 0.0000918 | -1.61 | IL2RG        | interleukin 2 receptor, gamma                                               | Downregulated |
| A_23_P210 | 0.001134 | 0.000106  | -1.61 | PCIF1        | PDX1 C-terminal inhibiting factor 1                                         | Downregulated |
| A_33_P680 | 0.001135 | 0.000107  | -1.61 | LOC1005068   | uncharacterized LOC100506844                                                | Downregulated |
| A_23_P377 | 0.001175 | 0.000114  | -1.61 | TNRC18       | trinucleotide repeat containing 18                                          | Downregulated |
| A_23_P373 | 0.001267 | 0.000133  | -1.61 | FUZ          | fuzzy planar cell polarity protein                                          | Downregulated |
| A_22_P000 | 0.001298 | 0.000138  | -1.61 | lnc-CT47A1-1 | lnc-CT47A1-1:1                                                              | Downregulated |
| A_22_P000 | 0.001542 | 0.000189  | -1.61 | LINC00506    | long intergenic non-protein coding RNA 506                                  | Downregulated |
| A_24_P371 | 0.001633 | 0.00021   | -1.61 | C3orf58      | chromosome 3 open reading frame 58                                          | Downregulated |
| A_23_P105 | 0.001647 | 0.000213  | -1.61 | CAT          | catalase                                                                    | Downregulated |
| A_23_P861 | 0.001947 | 0.000285  | -1.61 | RPA2         | replication protein A2, 32kDa                                               | Downregulated |
| A_22_P000 | 0.002683 | 0.000478  | -1.61 | LOC255654    | uncharacterized LOC255654                                                   | Downregulated |
| A_32_P236 | 0.003439 | 0.0007    | -1.61 | ABCB10       | ATP-binding cassette, sub-family B (MDR/TAP), member 10                     | Downregulated |
| A_33_P332 | 0.006203 | 0.00166   | -1.61 | BLOC1S3      | biogenesis of lysosomal organelles complex-1, subunit 3                     | Downregulated |
| A_24_P945 | 0.006753 | 0.00187   | -1.61 | RABEP1       | rabaptin, RAB GTPase binding effector protein 1                             | Downregulated |
| A_23_P500 | 0.007149 | 0.00203   | -1.61 | SYNE1        | spectrin repeat containing, nuclear envelope 1                              | Downregulated |

|           |          |           |       |             |                                                           |               |
|-----------|----------|-----------|-------|-------------|-----------------------------------------------------------|---------------|
| A_23_P375 | 0.015845 | 0.00581   | -1.61 | FUNDC1      | FUN14 domain containing 1                                 | Downregulated |
| A_23_P288 | 0.020806 | 0.00816   | -1.61 | PIGH        | phosphatidylinositol glycan anchor biosynthesis, class H  | Downregulated |
| A_23_P365 | 0.030776 | 0.0133    | -1.61 | UBE3D       | ubiquitin protein ligase E3D                              | Downregulated |
| A_23_P204 | 0.00097  | 0.0000738 | -1.62 | RB1         | retinoblastoma 1                                          | Downregulated |
| A_23_P411 | 0.000975 | 0.0000749 | -1.62 | PYGO2       | pygopus family PHD finger 2                               | Downregulated |
| A_23_P111 | 0.001055 | 0.0000896 | -1.62 | AGAP3       | ArfGAP with GTPase domain, ankyrin repeat and PH domain 3 | Downregulated |
| A_33_P322 | 0.001078 | 0.0000947 | -1.62 | OFD1        | oral-facial-digital syndrome 1                            | Downregulated |
| A_24_P160 | 0.001086 | 0.0000962 | -1.62 | PTRHD1      | peptidyl-tRNA hydrolase domain containing 1               | Downregulated |
| A_23_P148 | 0.0011   | 0.0000993 | -1.62 | RLIM        | ring finger protein, LIM domain interacting               | Downregulated |
| A_33_P335 | 0.001199 | 0.000119  | -1.62 | AGAP2       | ArfGAP with GTPase domain, ankyrin repeat and PH domain 2 | Downregulated |
| A_23_P127 | 0.001372 | 0.000152  | -1.62 | FAM35A      | family with sequence similarity 35, member A              | Downregulated |
| A_33_P339 | 0.001552 | 0.000191  | -1.62 | RHOB        | ras homolog family member B                               | Downregulated |
| A_23_P392 | 0.001595 | 0.0002    | -1.62 | ZFP36       | ZFP36 ring finger protein                                 | Downregulated |
| A_23_P423 | 0.001709 | 0.000228  | -1.62 | FANCE       | Fanconi anemia, complementation group E                   | Downregulated |
| A_23_P478 | 0.001753 | 0.000237  | -1.62 | DIABLO      | diablo, IAP-binding mitochondrial protein                 | Downregulated |
| A_32_P768 | 0.001754 | 0.000238  | -1.62 | GOLGA8R     | golgin A8 family, member R                                | Downregulated |
| A_32_P407 | 0.001916 | 0.000278  | -1.62 | LOC1019270  | uncharacterized LOC101927085                              | Downregulated |
| A_33_P326 | 0.002253 | 0.000369  | -1.62 | ACTR3C      | ARP3 actin-related protein 3 homolog C (yeast)            | Downregulated |
| A_22_P000 | 0.003535 | 0.000729  | -1.62 | lnc-WDFY4-1 | lnc-WDFY4-1:1                                             | Downregulated |
| A_22_P000 | 0.003795 | 0.000808  | -1.62 | lnc-FSCB-4  | lnc-FSCB-4:1                                              | Downregulated |
| A_23_P200 | 0.007984 | 0.00236   | -1.62 | TGFBR3      | transforming growth factor, beta receptor III             | Downregulated |
| A_32_P479 | 0.014341 | 0.0051    | -1.62 | CAMK2D      | calcium/calmodulin-dependent protein kinase II delta      | Downregulated |
| A_23_P215 | 0.018633 | 0.00712   | -1.62 | KLHL7       | kelch-like family member 7                                | Downregulated |
| A_21_P000 | 0.042431 | 0.0197    | -1.62 | lnc-NFRKB-1 | lnc-NFRKB-1:1                                             | Downregulated |
| A_33_P335 | 0.000946 | 0.0000693 | -1.63 | GPD2        | glycerol-3-phosphate dehydrogenase 2 (mitochondrial)      | Downregulated |
| A_23_P100 | 0.000964 | 0.0000731 | -1.63 | SKAP1       | src kinase associated phosphoprotein 1                    | Downregulated |
| A_33_P326 | 0.001066 | 0.0000924 | -1.63 | RNVU1-18    | RNA, variant U1 small nuclear 18                          | Downregulated |
| A_23_P122 | 0.001134 | 0.000106  | -1.63 | NELFE       | negative elongation factor complex member E               | Downregulated |
| A_23_P857 | 0.001142 | 0.000108  | -1.63 | FCGR2A      | Fc fragment of IgG, low affinity IIa, receptor (CD32)     | Downregulated |
| A_23_P326 | 0.001224 | 0.000124  | -1.63 | RBBP4       | retinoblastoma binding protein 4                          | Downregulated |
| A_23_P226 | 0.001295 | 0.000138  | -1.63 | CYSLTR1     | cysteinyl leukotriene receptor 1                          | Downregulated |
| A_23_P699 | 0.001826 | 0.000256  | -1.63 | SOX30       | SRY (sex determining region Y)-box 30                     | Downregulated |
| A_19_P003 | 0.001826 | 0.000256  | -1.63 | TUG1        | taurine up-regulated 1 (non-protein coding)               | Downregulated |
| A_23_P366 | 0.002124 | 0.000335  | -1.63 | AQP5        | aquaporin 5                                               | Downregulated |
| A_24_P174 | 0.002414 | 0.000407  | -1.63 | PPP1R2      | protein phosphatase 1, regulatory (inhibitor) subunit 2   | Downregulated |
| A_21_P000 | 0.002709 | 0.000486  | -1.63 | RBM19       | RNA binding motif protein 19                              | Downregulated |
| A_33_P331 | 0.003027 | 0.000576  | -1.63 | PARD6G-AS1  | PARD6G antisense RNA 1                                    | Downregulated |

|           |          |           |       |                |                                                                     |               |
|-----------|----------|-----------|-------|----------------|---------------------------------------------------------------------|---------------|
| A_23_P371 | 0.006716 | 0.00186   | -1.63 | ALKBH8         | alkB, alkylation repair homolog 8 (E. coli)                         | Downregulated |
| A_22_P000 | 0.01975  | 0.00765   | -1.63 | Inc-ACP1-1     | Inc-ACP1-1:2                                                        | Downregulated |
| A_23_P225 | 0.02385  | 0.00969   | -1.63 | CHM            | choroideremia (Rab escort protein 1)                                | Downregulated |
| A_24_P216 | 0.024364 | 0.00996   | -1.63 | SOAT1          | sterol O-acyltransferase 1                                          | Downregulated |
| A_24_P145 | 0.000938 | 0.0000671 | -1.64 | TRA2B          | transformer 2 beta homolog (Drosophila)                             | Downregulated |
| A_24_P273 | 0.000954 | 0.0000702 | -1.64 | LINC00152      | long intergenic non-protein coding RNA 152                          | Downregulated |
| A_23_P398 | 0.000954 | 0.0000704 | -1.64 | MIEN1          | migration and invasion enhancer 1                                   | Downregulated |
| A_24_P253 | 0.000973 | 0.0000746 | -1.64 | AP2B1          | adaptor-related protein complex 2, beta 1 subunit                   | Downregulated |
| A_23_P132 | 0.000991 | 0.0000771 | -1.64 | UQCRC1         | ubiquinol-cytochrome c reductase core protein I                     | Downregulated |
| A_33_P338 | 0.001069 | 0.0000934 | -1.64 | CAPG           | capping protein (actin filament), gelsolin-like                     | Downregulated |
| A_23_P435 | 0.001142 | 0.000108  | -1.64 | ST8SIA4        | ST8 alpha-N-acetyl-neuraminide alpha-2,8-sialyltransferase 4        | Downregulated |
| A_23_P770 | 0.001203 | 0.00012   | -1.64 | SPPL2A         | signal peptide peptidase like 2A                                    | Downregulated |
| A_24_P196 | 0.001245 | 0.000128  | -1.64 | GTF2H5         | general transcription factor IIH, polypeptide 5                     | Downregulated |
| A_23_P810 | 0.001443 | 0.000168  | -1.64 | STIM2          | stromal interaction molecule 2                                      | Downregulated |
| A_22_P000 | 0.001607 | 0.000203  | -1.64 | Inc-RP11-257   | Inc-RP11-257K9.7.1-2:1                                              | Downregulated |
| A_33_P327 | 0.001925 | 0.00028   | -1.64 | UBE2J1         | ubiquitin-conjugating enzyme E2, J1                                 | Downregulated |
| A_33_P333 | 0.00212  | 0.000333  | -1.64 | ZBED5-AS1      | ZBED5 antisense RNA 1                                               | Downregulated |
| A_21_P000 | 0.003716 | 0.000784  | -1.64 | TM4SF19        | transmembrane 4 L six family member 19                              | Downregulated |
| A_23_P752 | 0.005695 | 0.00147   | -1.64 | NSMCE4A        | non-SMC element 4 homolog A (S. cerevisiae)                         | Downregulated |
| A_22_P000 | 0.009842 | 0.00313   | -1.64 | ZEB2-AS1       | ZEB2 antisense RNA 1                                                | Downregulated |
| A_23_P357 | 0.014594 | 0.00522   | -1.64 | NAA40          | N(alpha)-acetyltransferase 40, NatD catalytic subunit               | Downregulated |
| A_33_P328 | 0.015428 | 0.00562   | -1.64 | LOC1001322     | uncharacterized LOC100132249                                        | Downregulated |
| A_23_P157 | 0.019778 | 0.00766   | -1.64 | POLR2K         | polymerase (RNA) II (DNA directed) polypeptide K, 7.0kDa            | Downregulated |
| A_33_P337 | 0.042497 | 0.0198    | -1.64 | IMPA1          | inositol(myo)-1(or 4)-monophosphatase 1                             | Downregulated |
| A_22_P000 | 0.000919 | 0.0000645 | -1.65 | Inc-PAPSS2-2   | Inc-PAPSS2-2:1                                                      | Downregulated |
| A_23_P420 | 0.000949 | 0.0000698 | -1.65 | PRKCB          | protein kinase C, beta                                              | Downregulated |
| A_23_P502 | 0.001187 | 0.000116  | -1.65 | ANGPTL6        | angiopoietin-like 6                                                 | Downregulated |
| A_21_P001 | 0.00119  | 0.000117  | -1.65 | XLOC_I2_004771 |                                                                     | Downregulated |
| A_23_P152 | 0.001314 | 0.000141  | -1.65 | ICAM2          | intercellular adhesion molecule 2                                   | Downregulated |
| A_23_P397 | 0.001612 | 0.000205  | -1.65 | SAMD3          | sterile alpha motif domain containing 3                             | Downregulated |
| A_23_P215 | 0.001884 | 0.00027   | -1.65 | ST7            | suppression of tumorigenicity 7                                     | Downregulated |
| A_33_P339 | 0.001996 | 0.000299  | -1.65 | PI4KA          | phosphatidylinositol 4-kinase, catalytic, alpha                     | Downregulated |
| A_33_P335 | 0.003126 | 0.000607  | -1.65 | NFXL1          | nuclear transcription factor, X-box binding-like 1                  | Downregulated |
| A_33_P331 | 0.003445 | 0.000701  | -1.65 | ZZZ3           | zinc finger, ZZ-type containing 3                                   | Downregulated |
| A_33_P339 | 0.01153  | 0.00385   | -1.65 | CCDC134        | coiled-coil domain containing 134                                   | Downregulated |
| A_23_P256 | 0.015485 | 0.00564   | -1.65 | SLC10A1        | solute carrier family 10 (sodium/bile acid cotransporter), member 1 | Downregulated |
| A_24_P577 | 0.015919 | 0.00584   | -1.65 | MRPL52         | mitochondrial ribosomal protein L52                                 | Downregulated |

|           |          |           |       |                |                                                                             |               |
|-----------|----------|-----------|-------|----------------|-----------------------------------------------------------------------------|---------------|
| A_22_P000 | 0.000995 | 0.0000787 | -1.66 | lnc-VAMP1-1    | lnc-VAMP1-1:7                                                               | Downregulated |
| A_22_P000 | 0.00102  | 0.000083  | -1.66 | lnc-CTU2-2     | lnc-CTU2-2:1                                                                | Downregulated |
| A_23_P154 | 0.001029 | 0.0000849 | -1.66 | SAP130         | Sin3A-associated protein, 130kDa                                            | Downregulated |
| A_23_P163 | 0.001121 | 0.000104  | -1.66 | PARP6          | poly (ADP-ribose) polymerase family, member 6                               | Downregulated |
| A_23_P435 | 0.001156 | 0.00011   | -1.66 | NDUFA8         | NADH dehydrogenase (ubiquinone) 1 alpha subcomplex, 8, 19kDa                | Downregulated |
| A_21_P001 | 0.001353 | 0.000149  | -1.66 | XLOC_I2_013462 |                                                                             | Downregulated |
| A_33_P328 | 0.00162  | 0.000206  | -1.66 | FUBP1          | far upstream element (FUSE) binding protein 1                               | Downregulated |
| A_23_P169 | 0.00179  | 0.000246  | -1.66 | MRPS28         | mitochondrial ribosomal protein S28                                         | Downregulated |
| A_23_P407 | 0.001844 | 0.00026   | -1.66 | KIRREL3        | kin of IRRE like 3 (Drosophila)                                             | Downregulated |
| A_33_P334 | 0.00232  | 0.000383  | -1.66 | SUPT3H         | suppressor of Ty 3 homolog (S. cerevisiae)                                  | Downregulated |
| A_23_P621 | 0.002674 | 0.000475  | -1.66 | TIMP1          | TIMP metalloproteinase inhibitor 1                                          | Downregulated |
| A_23_P660 | 0.002685 | 0.000479  | -1.66 | B3GNT9         | UDP-GlcNAc:betaGal beta-1,3-N-acetylglucosaminyltransferase 9               | Downregulated |
| A_23_P353 | 0.002685 | 0.000479  | -1.66 | RMI2           | RecQ mediated genome instability 2                                          | Downregulated |
| A_33_P324 | 0.002701 | 0.000484  | -1.66 | SLC35E2B       | solute carrier family 35, member E2B                                        | Downregulated |
| A_32_P348 | 0.005993 | 0.00158   | -1.66 | WDR93          | WD repeat domain 93                                                         | Downregulated |
| A_22_P000 | 0.007155 | 0.00203   | -1.66 | LOC1026064     | uncharacterized LOC102606465                                                | Downregulated |
| A_33_P337 | 0.010925 | 0.00357   | -1.66 | ABCB9          | ATP-binding cassette, sub-family B (MDR/TAP), member 9                      | Downregulated |
| A_22_P000 | 0.012258 | 0.00416   | -1.66 | MEG3           | maternally expressed 3 (non-protein coding)                                 | Downregulated |
| A_22_P000 | 0.014395 | 0.00513   | -1.66 | MRPL46         | mitochondrial ribosomal protein L46                                         | Downregulated |
| A_21_P000 | 0.01597  | 0.00587   | -1.66 | LOC1019275     | uncharacterized LOC101927584                                                | Downregulated |
| A_33_P339 | 0.029475 | 0.0126    | -1.66 | GYLTL1B        | glycosyltransferase-like 1B                                                 | Downregulated |
| A_23_P311 | 0.000918 | 0.0000643 | -1.67 | GINM1          | glycoprotein integral membrane 1                                            | Downregulated |
| A_33_P325 | 0.000928 | 0.0000657 | -1.67 | ARHGAP40       | Rho GTPase activating protein 40                                            | Downregulated |
| A_33_P323 | 0.000945 | 0.0000688 | -1.67 | RLTPR          | RGD motif, leucine rich repeats, tropomodulin domain and proline-rich alpha | Downregulated |
| A_23_P726 | 0.000963 | 0.0000727 | -1.67 | HGS            | hepatocyte growth factor-regulated tyrosine kinase substrate                | Downregulated |
| A_23_P394 | 0.001052 | 0.0000889 | -1.67 | BST2           | bone marrow stromal cell antigen 2                                          | Downregulated |
| A_23_P155 | 0.001142 | 0.000108  | -1.67 | CRELD1         | cysteine-rich with EGF-like domains 1                                       | Downregulated |
| A_24_P416 | 0.001181 | 0.000115  | -1.67 | RBL2           | retinoblastoma-like 2                                                       | Downregulated |
| A_22_P000 | 0.001369 | 0.000152  | -1.67 | lnc-CTDSPL2    | lnc-CTDSPL2-2:1                                                             | Downregulated |
| A_23_P162 | 0.001397 | 0.000158  | -1.67 | PTPN6          | protein tyrosine phosphatase, non-receptor type 6                           | Downregulated |
| A_23_P161 | 0.001498 | 0.00018   | -1.67 | SNAPIN         | SNAP-associated protein                                                     | Downregulated |
| A_19_P008 | 0.001653 | 0.000214  | -1.67 | LOC1005068     | uncharacterized LOC100506804                                                | Downregulated |
| A_23_P374 | 0.002912 | 0.000542  | -1.67 | SECISBP2L      | SECIS binding protein 2-like                                                | Downregulated |
| A_22_P000 | 0.003096 | 0.000597  | -1.67 | LOC1027253     | uncharacterized LOC102725300                                                | Downregulated |
| A_23_P135 | 0.004362 | 0.000996  | -1.67 | CKAP5          | cytoskeleton associated protein 5                                           | Downregulated |
| A_21_P000 | 0.005292 | 0.00132   | -1.67 | lnc-MDGA2-2    | lnc-MDGA2-2:1                                                               | Downregulated |
| A_23_P145 | 0.006123 | 0.00163   | -1.67 | MTO1           | mitochondrial tRNA translation optimization 1                               | Downregulated |

|           |          |           |       |                |                                                                       |               |
|-----------|----------|-----------|-------|----------------|-----------------------------------------------------------------------|---------------|
| A_24_P937 | 0.006315 | 0.0017    | -1.67 | EHMT1-IT1      | EHMT1 intronic transcript 1                                           | Downregulated |
| A_33_P339 | 0.007941 | 0.00234   | -1.67 | ATG4C          | autophagy related 4C, cysteine peptidase                              | Downregulated |
| A_19_P003 | 0.009601 | 0.00302   | -1.67 | MCF2L          | MCF.2 cell line derived transforming sequence-like                    | Downregulated |
| A_22_P000 | 0.014634 | 0.00525   | -1.67 | lnc-MPHOSP1    | lnc-MPHOSPH8-3:1                                                      | Downregulated |
| A_24_P236 | 0.021828 | 0.00866   | -1.67 | CD2BP2         | CD2 (cytoplasmic tail) binding protein 2                              | Downregulated |
| A_23_P729 | 0.02308  | 0.00928   | -1.67 | PRPS1          | phosphoribosyl pyrophosphate synthetase 1                             | Downregulated |
| A_24_P270 | 0.023092 | 0.00928   | -1.67 | SCN4A          | sodium channel, voltage gated, type IV alpha subunit                  | Downregulated |
| A_24_P416 | 0.000904 | 0.0000619 | -1.68 | GGA2           | golgi-associated, gamma adaptin ear containing, ARF binding protein 2 | Downregulated |
| A_33_P326 | 0.000938 | 0.0000677 | -1.68 | NEDD1          | neural precursor cell expressed, developmentally down-regulated 1     | Downregulated |
| A_24_P282 | 0.000959 | 0.0000711 | -1.68 | TLK1           | tousled-like kinase 1                                                 | Downregulated |
| A_33_P327 | 0.001043 | 0.0000871 | -1.68 | FKBP2          | FK506 binding protein 2, 13kDa                                        | Downregulated |
| A_23_P798 | 0.001118 | 0.000103  | -1.68 | OSER1          | oxidative stress responsive serine-rich 1                             | Downregulated |
| A_32_P386 | 0.001135 | 0.000106  | -1.68 | KRBA1          | KRAB-A domain containing 1                                            | Downregulated |
| A_23_P531 | 0.001296 | 0.000138  | -1.68 | LMO2           | LIM domain only 2 (rhombotin-like 1)                                  | Downregulated |
| A_33_P321 | 0.001694 | 0.000224  | -1.68 | KDM5C          | lysine (K)-specific demethylase 5C                                    | Downregulated |
| A_23_P107 | 0.001753 | 0.000237  | -1.68 | RAB27B         | RAB27B, member RAS oncogene family                                    | Downregulated |
| A_21_P000 | 0.002118 | 0.000333  | -1.68 | lnc-GPR65-1    | lnc-GPR65-1:1                                                         | Downregulated |
| A_22_P000 | 0.002221 | 0.000359  | -1.68 | lnc-RIIAD1-1   | lnc-RIIAD1-1:1                                                        | Downregulated |
| A_23_P307 | 0.002408 | 0.000405  | -1.68 | LSM12          | LSM12 homolog (S. cerevisiae)                                         | Downregulated |
| A_24_P212 | 0.003714 | 0.000784  | -1.68 | ZNF33A         | zinc finger protein 33A                                               | Downregulated |
| A_21_P000 | 0.005951 | 0.00156   | -1.68 | SNORD42A       | small nucleolar RNA, C/D box 42A                                      | Downregulated |
| A_23_P327 | 0.007949 | 0.00234   | -1.68 | GATS           | GATS, stromal antigen 3 opposite strand                               | Downregulated |
| A_33_P324 | 0.008307 | 0.00249   | -1.68 | XLOC_I2_000001 |                                                                       | Downregulated |
| A_23_P943 | 0.013786 | 0.00484   | -1.68 | ADCK5          | aarF domain containing kinase 5                                       | Downregulated |
| A_24_P182 | 0.016408 | 0.00609   | -1.68 | GCSAM          | germinal center-associated, signaling and motility                    | Downregulated |
| A_19_P008 | 0.018008 | 0.00683   | -1.68 | XLOC_I2_008221 |                                                                       | Downregulated |
| A_33_P340 | 0.019244 | 0.00742   | -1.68 | EXOG           | endo/exonuclease (5'-3'), endonuclease G-like                         | Downregulated |
| A_33_P331 | 0.019709 | 0.00763   | -1.68 | LOC1005061     | uncharacterized LOC100506191                                          | Downregulated |
| A_24_P937 | 0.029816 | 0.0128    | -1.68 | TMEM198B       | transmembrane protein 198B, pseudogene                                | Downregulated |
| A_22_P000 | 0.000908 | 0.0000626 | -1.69 | lnc-EMILIN2-1  | lnc-EMILIN2-1:2                                                       | Downregulated |
| A_23_P419 | 0.000966 | 0.0000734 | -1.69 | BLCAP          | bladder cancer associated protein                                     | Downregulated |
| A_32_P309 | 0.001054 | 0.0000894 | -1.69 | WDFY4          | WDFY family member 4                                                  | Downregulated |
| A_21_P000 | 0.001057 | 0.0000901 | -1.69 | lnc-CHST12-1   | lnc-CHST12-1:6                                                        | Downregulated |
| A_23_P303 | 0.001443 | 0.000167  | -1.69 | STX7           | syntaxin 7                                                            | Downregulated |
| A_24_P581 | 0.001557 | 0.000192  | -1.69 | C14orf159      | chromosome 14 open reading frame 159                                  | Downregulated |
| A_22_P000 | 0.002889 | 0.000536  | -1.69 | lnc-SIVA1-1    | lnc-SIVA1-1:1                                                         | Downregulated |
| A_23_P559 | 0.00324  | 0.000641  | -1.69 | SLC1A5         | solute carrier family 1 (neutral amino acid transporter), member 5    | Downregulated |



|           |          |           |       |              |                                                                   |               |
|-----------|----------|-----------|-------|--------------|-------------------------------------------------------------------|---------------|
| A_22_P000 | 0.003633 | 0.000759  | -1.69 | lnc-COL1A1-2 | lnc-COL1A1-2:1                                                    | Downregulated |
| A_33_P322 | 0.00701  | 0.00197   | -1.69 | FBXO43       | F-box protein 43                                                  | Downregulated |
| A_24_P116 | 0.008498 | 0.00257   | -1.69 | WVOX         | WW domain containing oxidoreductase                               | Downregulated |
| A_33_P334 | 0.009072 | 0.00281   | -1.69 | ARGFXP2      | arginine-fifty homeobox pseudogene 2                              | Downregulated |
| A_23_P307 | 0.009186 | 0.00285   | -1.69 | ABT1         | activator of basal transcription 1                                | Downregulated |
| A_32_P940 | 0.023473 | 0.00948   | -1.69 | FAM92A1P2    | family with sequence similarity 92, member A3                     | Downregulated |
| A_24_P237 | 0.025844 | 0.0107    | -1.69 | EIF1AX       | eukaryotic translation initiation factor 1A, X-linked             | Downregulated |
| A_21_P001 | 0.03725  | 0.0168    | -1.69 | HHIP         | hedgehog interacting protein                                      | Downregulated |
| A_33_P346 | 0.000913 | 0.000639  | -1.7  | GTPBP10      | GTP-binding protein 10 (putative)                                 | Downregulated |
| A_33_P339 | 0.000925 | 0.000652  | -1.7  | PTGR1        | prostaglandin reductase 1                                         | Downregulated |
| A_22_P000 | 0.000938 | 0.000675  | -1.7  | DUS2         | dihydrouridine synthase 2                                         | Downregulated |
| A_24_P320 | 0.000998 | 0.000798  | -1.7  | C6orf106     | chromosome 6 open reading frame 106                               | Downregulated |
| A_24_P323 | 0.001023 | 0.000839  | -1.7  | GNRH2        | gonadotropin-releasing hormone 2                                  | Downregulated |
| A_22_P000 | 0.001095 | 0.000978  | -1.7  | lnc-ITM2C-2  | lnc-ITM2C-2:1                                                     | Downregulated |
| A_33_P325 | 0.001453 | 0.000171  | -1.7  | RMND5B       | required for meiotic nuclear division 5 homolog B (S. cerevisiae) | Downregulated |
| A_23_P341 | 0.001536 | 0.000188  | -1.7  | MNT          | MAX network transcriptional repressor                             | Downregulated |
| A_33_P335 | 0.001691 | 0.000223  | -1.7  | LOC388692    | uncharacterized LOC388692                                         | Downregulated |
| A_23_P119 | 0.002488 | 0.000426  | -1.7  | TIMM44       | translocase of inner mitochondrial membrane 44 homolog (yeast)    | Downregulated |
| A_23_P208 | 0.003521 | 0.000724  | -1.7  | EMC10        | ER membrane protein complex subunit 10                            | Downregulated |
| A_23_P315 | 0.005093 | 0.00124   | -1.7  | ABHD11       | abhydrolase domain containing 11                                  | Downregulated |
| A_23_P125 | 0.007111 | 0.00202   | -1.7  | TMEM255A     | transmembrane protein 255A                                        | Downregulated |
| A_23_P996 | 0.007969 | 0.00235   | -1.7  | RNF31        | ring finger protein 31                                            | Downregulated |
| A_24_P322 | 0.010101 | 0.00324   | -1.7  | ELMO2        | engulfment and cell motility 2                                    | Downregulated |
| A_33_P324 | 0.011206 | 0.0037    | -1.7  | MAVS         | mitochondrial antiviral signaling protein                         | Downregulated |
| A_33_P325 | 0.012979 | 0.00448   | -1.7  | OGFR         | opioid growth factor receptor                                     | Downregulated |
| A_33_P329 | 0.027436 | 0.0116    | -1.7  | DENND4C      | DENN/MADD domain containing 4C                                    | Downregulated |
| A_32_P206 | 0.028104 | 0.0119    | -1.7  | DNAH2        | dynein, axonemal, heavy chain 2                                   | Downregulated |
| A_22_P000 | 0.000899 | 0.0000611 | -1.71 | lnc-PLEKHA3  | lnc-PLEKHA3-3:1                                                   | Downregulated |
| A_23_P537 | 0.000924 | 0.0000649 | -1.71 | FBXO21       | F-box protein 21                                                  | Downregulated |
| A_33_P330 | 0.000949 | 0.0000698 | -1.71 | C21orf58     | chromosome 21 open reading frame 58                               | Downregulated |
| A_23_P361 | 0.000954 | 0.0000705 | -1.71 | SLC35F5      | solute carrier family 35, member F5                               | Downregulated |
| A_33_P324 | 0.000971 | 0.0000743 | -1.71 | HBS1L        | HBS1-like translational GTPase                                    | Downregulated |
| A_22_P000 | 0.001022 | 0.0000836 | -1.71 | LINC01429    | long intergenic non-protein coding RNA 1429                       | Downregulated |
| A_33_P330 | 0.001062 | 0.0000907 | -1.71 | RANBP2       | RAN binding protein 2                                             | Downregulated |
| A_33_P365 | 0.001086 | 0.000096  | -1.71 | CXorf49B     | chromosome X open reading frame 49B                               | Downregulated |
| A_33_P324 | 0.001991 | 0.000298  | -1.71 | ATAD3C       | ATPase family, AAA domain containing 3C                           | Downregulated |
| A_21_P000 | 0.002488 | 0.000426  | -1.71 | LOC1002893   | uncharacterized LOC100289361                                      | Downregulated |

|           |          |           |       |                |                                                                      |               |
|-----------|----------|-----------|-------|----------------|----------------------------------------------------------------------|---------------|
| A_22_P000 | 0.006688 | 0.00185   | -1.71 | lnc-UPK3B-1    | lnc-UPK3B-1:3                                                        | Downregulated |
| A_33_P324 | 0.026919 | 0.0113    | -1.71 | RGS5           | regulator of G-protein signaling 5                                   | Downregulated |
| A_23_P483 | 0.041342 | 0.0191    | -1.71 | PCCA           | propionyl CoA carboxylase, alpha polypeptide                         | Downregulated |
| A_23_P212 | 0.001015 | 0.0000824 | -1.72 | NAT6           | N-acetyltransferase 6 (GCN5-related)                                 | Downregulated |
| A_23_P209 | 0.001029 | 0.0000848 | -1.72 | TRAK2          | trafficking protein, kinesin binding 2                               | Downregulated |
| A_22_P000 | 0.0011   | 0.0000992 | -1.72 | lnc-ADAMTS1    | lnc-ADAMTS18-1:1                                                     | Downregulated |
| A_23_P578 | 0.001187 | 0.000116  | -1.72 | ACY1           | aminoacylase 1                                                       | Downregulated |
| A_23_P798 | 0.001386 | 0.000155  | -1.72 | SERINC3        | serine incorporator 3                                                | Downregulated |
| A_22_P000 | 0.001444 | 0.000168  | -1.72 | lnc-SLC22A1    | lnc-SLC22A18-1:1                                                     | Downregulated |
| A_22_P000 | 0.00151  | 0.000182  | -1.72 | lnc-LIFR-1     | lnc-LIFR-1:1                                                         | Downregulated |
| A_33_P331 | 0.001604 | 0.000202  | -1.72 | CCDC14         | coiled-coil domain containing 14                                     | Downregulated |
| A_33_P331 | 0.001738 | 0.000234  | -1.72 | PHIP           | pleckstrin homology domain interacting protein                       | Downregulated |
| A_23_P196 | 0.001742 | 0.000235  | -1.72 | RARRES3        | retinoic acid receptor responder (tazarotene induced) 3              | Downregulated |
| A_21_P000 | 0.001744 | 0.000235  | -1.72 | SNORA80E       | small nucleolar RNA, H/ACA box 80E                                   | Downregulated |
| A_21_P000 | 0.001808 | 0.000251  | -1.72 | METTL23        | methyltransferase like 23                                            | Downregulated |
| A_24_P134 | 0.001893 | 0.000272  | -1.72 | BTBD3          | BTB (POZ) domain containing 3                                        | Downregulated |
| A_23_P209 | 0.001962 | 0.000291  | -1.72 | CLIP4          | CAP-GLY domain containing linker protein family, member 4            | Downregulated |
| A_23_P520 | 0.002022 | 0.000306  | -1.72 | GRHL3          | grainyhead-like 3 (Drosophila)                                       | Downregulated |
| A_23_P498 | 0.002621 | 0.000462  | -1.72 | ADAP2          | ArfGAP with dual PH domains 2                                        | Downregulated |
| A_23_P396 | 0.003847 | 0.000827  | -1.72 | ORC2           | origin recognition complex, subunit 2                                | Downregulated |
| A_23_P252 | 0.003875 | 0.000835  | -1.72 | RIPK2          | receptor-interacting serine-threonine kinase 2                       | Downregulated |
| A_33_P321 | 0.004961 | 0.0012    | -1.72 | ENTPD1         | ectonucleoside triphosphate diphosphohydrolase 1                     | Downregulated |
| A_21_P000 | 0.006305 | 0.0017    | -1.72 | lnc-ZNF37A-3   | lnc-ZNF37A-3:2                                                       | Downregulated |
| A_21_P001 | 0.00635  | 0.00172   | -1.72 | XLOC_I2_007586 |                                                                      | Downregulated |
| A_23_P741 | 0.006955 | 0.00195   | -1.72 | RAD54L         | RAD54-like (S. cerevisiae)                                           | Downregulated |
| A_23_P432 | 0.030987 | 0.0134    | -1.72 | CHMP4C         | charged multivesicular body protein 4C                               | Downregulated |
| A_33_P330 | 0.000877 | 0.0000583 | -1.73 | PARP4          | poly (ADP-ribose) polymerase family, member 4                        | Downregulated |
| A_23_P131 | 0.000909 | 0.000063  | -1.73 | HDLBP          | high density lipoprotein binding protein                             | Downregulated |
| A_24_P412 | 0.000915 | 0.0000641 | -1.73 | TMEM143        | transmembrane protein 143                                            | Downregulated |
| A_24_P216 | 0.001022 | 0.0000836 | -1.73 | ERGIC3         | ERGIC and golgi 3                                                    | Downregulated |
| A_23_P118 | 0.001036 | 0.000086  | -1.73 | SRP68          | signal recognition particle 68kDa                                    | Downregulated |
| A_33_P338 | 0.00124  | 0.000126  | -1.73 | MDM4           | MDM4, p53 regulator                                                  | Downregulated |
| A_23_P622 | 0.001279 | 0.000135  | -1.73 | NKAP           | NFKB activating protein                                              | Downregulated |
| A_23_P142 | 0.001492 | 0.000179  | -1.73 | GIGYF2         | GRB10 interacting GYF protein 2                                      | Downregulated |
| A_33_P334 | 0.002027 | 0.000308  | -1.73 | SLC25A37       | solute carrier family 25 (mitochondrial iron transporter), member 37 | Downregulated |
| A_33_P322 | 0.002054 | 0.000315  | -1.73 | KNSTRN         | kinetochore-localized astrin/SPAG5 binding protein                   | Downregulated |
| A_33_P334 | 0.002219 | 0.000358  | -1.73 | ZNF280D        | zinc finger protein 280D                                             | Downregulated |

|           |          |           |       |                |                                                                    |               |
|-----------|----------|-----------|-------|----------------|--------------------------------------------------------------------|---------------|
| A_33_P336 | 0.002358 | 0.000393  | -1.73 | TRAPPC2        | trafficking protein particle complex 2                             | Downregulated |
| A_23_P203 | 0.002596 | 0.000455  | -1.73 | GAB2           | GRB2-associated binding protein 2                                  | Downregulated |
| A_23_P140 | 0.003567 | 0.000739  | -1.73 | NDRG4          | NDRG family member 4                                               | Downregulated |
| A_33_P335 | 0.004971 | 0.0012    | -1.73 | TAF4B          | TAF4b RNA polymerase II, TATA box binding protein (TBP)-associated | Downregulated |
| A_21_P000 | 0.007266 | 0.00207   | -1.73 | LOC1027239     | uncharacterized LOC102723932                                       | Downregulated |
| A_21_P000 | 0.01353  | 0.00472   | -1.73 | NIFK-AS1       | NIFK antisense RNA 1                                               | Downregulated |
| A_21_P000 | 0.022388 | 0.00893   | -1.73 | SNORD35A       | small nucleolar RNA, C/D box 35A                                   | Downregulated |
| A_33_P324 | 0.025262 | 0.0104    | -1.73 | IL1RN          | interleukin 1 receptor antagonist                                  | Downregulated |
| A_33_P326 | 0.030274 | 0.0131    | -1.73 | LOC1002891     | uncharacterized LOC100289120                                       | Downregulated |
| A_23_P147 | 0.000866 | 0.0000569 | -1.74 | RPS27L         | ribosomal protein S27-like                                         | Downregulated |
| A_23_P137 | 0.000931 | 0.0000663 | -1.74 | KDM5D          | lysine (K)-specific demethylase 5D                                 | Downregulated |
| A_22_P000 | 0.000938 | 0.0000676 | -1.74 | lnc-C14orf57-  | lnc-C14orf57-1:1                                                   | Downregulated |
| A_24_P277 | 0.000991 | 0.0000772 | -1.74 | FIS1           | fission 1 (mitochondrial outer membrane) homolog (S. cerevisiae)   | Downregulated |
| A_22_P000 | 0.00114  | 0.000108  | -1.74 | LINC00116      | long intergenic non-protein coding RNA 116                         | Downregulated |
| A_22_P000 | 0.001393 | 0.000156  | -1.74 | lnc-MAPK6-8    | lnc-MAPK6-8:1                                                      | Downregulated |
| A_33_P329 | 0.001763 | 0.00024   | -1.74 | FAM159A        | family with sequence similarity 159, member A                      | Downregulated |
| A_23_P148 | 0.002243 | 0.000366  | -1.74 | TSPAN3         | tetraspanin 3                                                      | Downregulated |
| A_24_P303 | 0.002301 | 0.000378  | -1.74 | ARL15          | ADP-ribosylation factor-like 15                                    | Downregulated |
| A_24_P234 | 0.002794 | 0.000508  | -1.74 | CSNK1G3        | casein kinase 1, gamma 3                                           | Downregulated |
| A_23_P837 | 0.005191 | 0.00128   | -1.74 | C11orf63       | chromosome 11 open reading frame 63                                | Downregulated |
| A_33_P342 | 0.008303 | 0.00249   | -1.74 | SP2            | Sp2 transcription factor                                           | Downregulated |
| A_23_P163 | 0.000853 | 0.000055  | -1.75 | ACYP1          | acylphosphatase 1, erythrocyte (common) type                       | Downregulated |
| A_23_P359 | 0.000903 | 0.0000616 | -1.75 | ALKBH3         | alkB, alkylation repair homolog 3 (E. coli)                        | Downregulated |
| A_33_P331 | 0.000923 | 0.0000648 | -1.75 | IMMT           | inner membrane protein, mitochondrial                              | Downregulated |
| A_33_P339 | 0.000991 | 0.0000772 | -1.75 | PROSER1        | proline and serine rich 1                                          | Downregulated |
| A_23_P152 | 0.001065 | 0.0000919 | -1.75 | CSK            | c-src tyrosine kinase                                              | Downregulated |
| A_24_P219 | 0.001546 | 0.00019   | -1.75 | RBM23          | RNA binding motif protein 23                                       | Downregulated |
| A_23_P231 | 0.002421 | 0.000408  | -1.75 | PINK1          | PTEN induced putative kinase 1                                     | Downregulated |
| A_33_P333 | 0.002503 | 0.000431  | -1.75 | XLOC_l2_015203 |                                                                    | Downregulated |
| A_21_P000 | 0.002568 | 0.000448  | -1.75 | lnc-CSMD1-9    | lnc-CSMD1-9:1                                                      | Downregulated |
| A_21_P000 | 0.002803 | 0.000511  | -1.75 | SNORD62A       | small nucleolar RNA, C/D box 62A                                   | Downregulated |
| A_33_P330 | 0.003637 | 0.00076   | -1.75 | DDX31          | DEAD (Asp-Glu-Ala-Asp) box polypeptide 31                          | Downregulated |
| A_33_P326 | 0.003878 | 0.000836  | -1.75 | PITRM1         | pitrilysin metalloproteinase 1                                     | Downregulated |
| A_33_P335 | 0.004745 | 0.00113   | -1.75 | ATHL1          | ATH1, acid trehalase-like 1 (yeast)                                | Downregulated |
| A_21_P000 | 0.004979 | 0.0012    | -1.75 | RAB30-AS1      | RAB30 antisense RNA 1 (head to head)                               | Downregulated |
| A_23_P201 | 0.005327 | 0.00133   | -1.75 | PTPN7          | protein tyrosine phosphatase, non-receptor type 7                  | Downregulated |
| A_23_P125 | 0.005417 | 0.00137   | -1.75 | SLC25A43       | solute carrier family 25, member 43                                | Downregulated |

|           |          |           |       |             |                                                                     |               |
|-----------|----------|-----------|-------|-------------|---------------------------------------------------------------------|---------------|
| A_19_P003 | 0.016688 | 0.00622   | -1.75 | AATBC       | uncharacterized LOC284837                                           | Downregulated |
| A_23_P122 | 0.00086  | 0.0000563 | -1.76 | LTV1        | LTV1 ribosome biogenesis factor                                     | Downregulated |
| A_24_P189 | 0.000952 | 0.0000701 | -1.76 | ENDOD1      | endonuclease domain containing 1                                    | Downregulated |
| A_24_P416 | 0.000959 | 0.0000711 | -1.76 | ADCY7       | adenylate cyclase 7                                                 | Downregulated |
| A_24_P917 | 0.000995 | 0.0000788 | -1.76 | TMED10      | transmembrane emp24-like trafficking protein 10 (yeast)             | Downregulated |
| A_33_P332 | 0.000998 | 0.0000796 | -1.76 | NLK         | nemo-like kinase                                                    | Downregulated |
| A_21_P001 | 0.001013 | 0.000082  | -1.76 | lnc-HSP90AA | lnc-HSP90AA1-5:1                                                    | Downregulated |
| A_33_P328 | 0.00123  | 0.000125  | -1.76 | FAM204A     | family with sequence similarity 204, member A                       | Downregulated |
| A_23_P398 | 0.001763 | 0.00024   | -1.76 | C15orf57    | chromosome 15 open reading frame 57                                 | Downregulated |
| A_23_P205 | 0.001826 | 0.000256  | -1.76 | GNB5        | guanine nucleotide binding protein (G protein), beta 5              | Downregulated |
| A_23_P604 | 0.00183  | 0.000257  | -1.76 | ODF2        | outer dense fiber of sperm tails 2                                  | Downregulated |
| A_33_P336 | 0.002101 | 0.000327  | -1.76 | RRN3        | RRN3 RNA polymerase I transcription factor homolog (S. cerevisiae)  | Downregulated |
| A_21_P000 | 0.002832 | 0.000519  | -1.76 | ITGB2-AS1   | ITGB2 antisense RNA 1                                               | Downregulated |
| A_24_P399 | 0.004012 | 0.000877  | -1.76 | ZCCHC3      | zinc finger, CCHC domain containing 3                               | Downregulated |
| A_33_P375 | 0.005623 | 0.00144   | -1.76 | M1AP        | meiosis 1 associated protein                                        | Downregulated |
| A_22_P000 | 0.009143 | 0.00284   | -1.76 | ZBED1       | zinc finger, BED-type containing 1                                  | Downregulated |
| A_23_P370 | 0.009526 | 0.00299   | -1.76 | SEPN1       | selenoprotein N, 1                                                  | Downregulated |
| A_33_P361 | 0.009939 | 0.00317   | -1.76 | LOC283516   | uncharacterized LOC283516                                           | Downregulated |
| A_33_P330 | 0.010871 | 0.00355   | -1.76 | ZBPB        | zona pellucida binding protein                                      | Downregulated |
| A_33_P332 | 0.011625 | 0.00389   | -1.76 | DAZAP2      | DAZ associated protein 2                                            | Downregulated |
| A_22_P000 | 0.016015 | 0.00588   | -1.76 | LOC1019281  | uncharacterized LOC101928156                                        | Downregulated |
| A_21_P000 | 0.024466 | 0.01      | -1.76 | CMAHP       | cytidine monophospho-N-acetylneuraminic acid hydroxylase, pseudoger | Downregulated |
| A_24_P844 | 0.000898 | 0.0000609 | -1.77 | VAV2        | vav 2 guanine nucleotide exchange factor                            | Downregulated |
| A_22_P000 | 0.000938 | 0.0000674 | -1.77 | CCDC175     | coiled-coil domain containing 175                                   | Downregulated |
| A_24_P655 | 0.000945 | 0.0000688 | -1.77 | STRA13      | stimulated by retinoic acid 13                                      | Downregulated |
| A_23_P243 | 0.000995 | 0.0000789 | -1.77 | OTUB1       | OTU deubiquitinase, ubiquitin aldehyde binding 1                    | Downregulated |
| A_23_P120 | 0.000999 | 0.0000799 | -1.77 | APOBEC3C    | apolipoprotein B mRNA editing enzyme, catalytic polypeptide-like 3C | Downregulated |
| A_23_P341 | 0.001333 | 0.000145  | -1.77 | WWC3        | WWC family member 3                                                 | Downregulated |
| A_23_P750 | 0.001638 | 0.000211  | -1.77 | ZMYND11     | zinc finger, MYND-type containing 11                                | Downregulated |
| A_23_P771 | 0.001702 | 0.000227  | -1.77 | RAB11A      | RAB11A, member RAS oncogene family                                  | Downregulated |
| A_22_P000 | 0.001808 | 0.00025   | -1.77 | lnc-ARL16-1 | lnc-ARL16-1:1                                                       | Downregulated |
| A_23_P334 | 0.002241 | 0.000365  | -1.77 | FAM167A     | family with sequence similarity 167, member A                       | Downregulated |
| A_22_P000 | 0.002995 | 0.000567  | -1.77 | lnc-FANCI-1 | lnc-FANCI-1:1                                                       | Downregulated |
| A_23_P115 | 0.003568 | 0.00074   | -1.77 | CELF2       | CUGBP, Elav-like family member 2                                    | Downregulated |
| A_33_P322 | 0.013974 | 0.00492   | -1.77 | TRMT13      | tRNA methyltransferase 13 homolog (S. cerevisiae)                   | Downregulated |
| A_23_P141 | 0.023836 | 0.00968   | -1.77 | DHRS7B      | dehydrogenase/reductase (SDR family) member 7B                      | Downregulated |
| A_23_P204 | 0.026881 | 0.0113    | -1.77 | ZNF384      | zinc finger protein 384                                             | Downregulated |

|           |          |           |       |              |                                                                       |               |
|-----------|----------|-----------|-------|--------------|-----------------------------------------------------------------------|---------------|
| A_33_P337 | 0.000987 | 0.0000764 | -1.78 | ABR          | active BCR-related                                                    | Downregulated |
| A_23_P400 | 0.000998 | 0.0000798 | -1.78 | GTF3C6       | general transcription factor IIIC, polypeptide 6, alpha 35kDa         | Downregulated |
| A_23_P858 | 0.001007 | 0.0000812 | -1.78 | CD52         | CD52 molecule                                                         | Downregulated |
| A_21_P001 | 0.001133 | 0.000106  | -1.78 | lnc-PPDPF-1  | lnc-PPDPF-1:2                                                         | Downregulated |
| A_23_P697 | 0.001149 | 0.000109  | -1.78 | AP1AR        | adaptor-related protein complex 1 associated regulatory protein       | Downregulated |
| A_24_P829 | 0.001203 | 0.00012   | -1.78 | RNF114       | ring finger protein 114                                               | Downregulated |
| A_22_P000 | 0.00151  | 0.000182  | -1.78 | lnc-SPTBN5-2 | lnc-SPTBN5-2:1                                                        | Downregulated |
| A_33_P320 | 0.001836 | 0.000258  | -1.78 | CTNND1       | catenin (cadherin-associated protein), delta 1                        | Downregulated |
| A_32_P933 | 0.002067 | 0.000319  | -1.78 | NUDT19       | nudix (nucleoside diphosphate linked moiety X)-type motif 19          | Downregulated |
| A_23_P831 | 0.0024   | 0.000404  | -1.78 | PTPLAD2      | protein tyrosine phosphatase-like A domain containing 2               | Downregulated |
| A_24_P274 | 0.003316 | 0.000665  | -1.78 | GTF2H2C_2    | GTF2H2 family member C, copy 2                                        | Downregulated |
| A_33_P324 | 0.003599 | 0.00075   | -1.78 | DMKN         | dermokine                                                             | Downregulated |
| A_24_P630 | 0.005643 | 0.00145   | -1.78 | SFXN5        | sideroflexin 5                                                        | Downregulated |
| A_23_P409 | 0.010468 | 0.00339   | -1.78 | PPM1A        | protein phosphatase, Mg <sup>2+</sup> /Mn <sup>2+</sup> dependent, 1A | Downregulated |
| A_23_P402 | 0.011468 | 0.00382   | -1.78 | LNK2         | ligand of numb-protein X 2                                            | Downregulated |
| A_23_P200 | 0.01384  | 0.00486   | -1.78 | NOTCH2       | notch 2                                                               | Downregulated |
| A_33_P338 | 0.015382 | 0.00559   | -1.78 | LOC1019271   | uncharacterized LOC101927100                                          | Downregulated |
| A_33_P323 | 0.023408 | 0.00945   | -1.78 | CLIP4        | CAP-GLY domain containing linker protein family, member 4             | Downregulated |
| A_23_P536 | 0.028042 | 0.0119    | -1.78 | PAWR         | PRKC, apoptosis, WT1, regulator                                       | Downregulated |
| A_23_P326 | 0.035407 | 0.0158    | -1.78 | CSMD3        | CUB and Sushi multiple domains 3                                      | Downregulated |
| A_22_P000 | 0.000807 | 0.0000487 | -1.79 | lnc-PLCD3-1  | lnc-PLCD3-1:1                                                         | Downregulated |
| A_23_P688 | 0.000906 | 0.0000623 | -1.79 | TUG1         | taurine up-regulated 1 (non-protein coding)                           | Downregulated |
| A_24_P253 | 0.000961 | 0.000072  | -1.79 | CIRH1A       | cirrhosis, autosomal recessive 1A (cirhin)                            | Downregulated |
| A_23_P126 | 0.000995 | 0.0000779 | -1.79 | PGD          | phosphogluconate dehydrogenase                                        | Downregulated |
| A_21_P000 | 0.001022 | 0.0000836 | -1.79 | SNORD58C     | small nucleolar RNA, C/D box 58C                                      | Downregulated |
| A_32_P177 | 0.001731 | 0.000232  | -1.79 | SPDYE5       | speedy/RINGO cell cycle regulator family member E5                    | Downregulated |
| A_33_P336 | 0.002022 | 0.000306  | -1.79 | SYT2         | synaptotagmin II                                                      | Downregulated |
| A_22_P000 | 0.002309 | 0.00038   | -1.79 | lnc-CD53-1   | lnc-CD53-1:1                                                          | Downregulated |
| A_33_P339 | 0.003003 | 0.000569  | -1.79 | C19orf84     | chromosome 19 open reading frame 84                                   | Downregulated |
| A_22_P000 | 0.003308 | 0.000661  | -1.79 | STRIP1       | striatin interacting protein 1                                        | Downregulated |
| A_23_P535 | 0.004344 | 0.00099   | -1.79 | MTERF2       | mitochondrial transcription termination factor 2                      | Downregulated |
| A_32_P355 | 0.004528 | 0.00105   | -1.79 | VPS35        | vacuolar protein sorting 35 homolog (S. cerevisiae)                   | Downregulated |
| A_22_P000 | 0.004677 | 0.0011    | -1.79 | lnc-EID1-3   | lnc-EID1-3:1                                                          | Downregulated |
| A_23_P158 | 0.009825 | 0.00312   | -1.79 | C9orf16      | chromosome 9 open reading frame 16                                    | Downregulated |
| A_23_P141 | 0.019109 | 0.00735   | -1.79 | RASL11A      | RAS-like, family 11, member A                                         | Downregulated |
| A_23_P361 | 0.033723 | 0.0149    | -1.79 | ATXN3L       | ataxin 3-like                                                         | Downregulated |
| A_21_P000 | 0.000904 | 0.0000619 | -1.8  | LOC1019277   | uncharacterized LOC101927712                                          | Downregulated |

|           |          |           |       |              |                                                                       |               |
|-----------|----------|-----------|-------|--------------|-----------------------------------------------------------------------|---------------|
| A_24_P389 | 0.001107 | 0.000101  | -1.8  | RELT         | RELT tumor necrosis factor receptor                                   | Downregulated |
| A_23_P123 | 0.001325 | 0.000143  | -1.8  | PRMT6        | protein arginine methyltransferase 6                                  | Downregulated |
| A_24_P336 | 0.001409 | 0.000161  | -1.8  | CABIN1       | calcineurin binding protein 1                                         | Downregulated |
| A_23_P215 | 0.001443 | 0.000167  | -1.8  | POM121       | POM121 transmembrane nucleoporin                                      | Downregulated |
| A_23_P385 | 0.001512 | 0.000183  | -1.8  | DNAJB6       | DnaJ (Hsp40) homolog, subfamily B, member 6                           | Downregulated |
| A_22_P000 | 0.006544 | 0.00179   | -1.8  | lnc-SMG6-3   | lnc-SMG6-3:1                                                          | Downregulated |
| A_33_P340 | 0.01812  | 0.00689   | -1.8  | CEP85L       | centrosomal protein 85kDa-like                                        | Downregulated |
| A_33_P354 | 0.02876  | 0.0122    | -1.8  | OR5AK4P      | olfactory receptor, family 5, subfamily AK, member 4 pseudogene       | Downregulated |
| A_23_P300 | 0.000805 | 0.0000483 | -1.81 | C6orf136     | chromosome 6 open reading frame 136                                   | Downregulated |
| A_23_P239 | 0.000814 | 0.0000497 | -1.81 | CAPN2        | calpain 2, (m/II) large subunit                                       | Downregulated |
| A_24_P186 | 0.000901 | 0.0000614 | -1.81 | PDS5A        | PDS5 cohesin associated factor A                                      | Downregulated |
| A_33_P339 | 0.00093  | 0.000066  | -1.81 | MBD1         | methyl-CpG binding domain protein 1                                   | Downregulated |
| A_21_P000 | 0.000939 | 0.0000679 | -1.81 | PARGP1       | poly (ADP-ribose) glycohydrolase pseudogene 1                         | Downregulated |
| A_21_P000 | 0.001471 | 0.000174  | -1.81 | lnc-CDC7-1   | lnc-CDC7-1:1                                                          | Downregulated |
| A_21_P001 | 0.001611 | 0.000204  | -1.81 | LINC00342    | long intergenic non-protein coding RNA 342                            | Downregulated |
| A_22_P000 | 0.001919 | 0.000278  | -1.81 | lnc-PAK2-1   | lnc-PAK2-1:1                                                          | Downregulated |
| A_33_P333 | 0.003816 | 0.000815  | -1.81 | ZNF746       | zinc finger protein 746                                               | Downregulated |
| A_24_P235 | 0.003932 | 0.000852  | -1.81 | THAP5        | THAP domain containing 5                                              | Downregulated |
| A_21_P000 | 0.006961 | 0.00195   | -1.81 | RNASEH1-AS1  | RNASEH1 antisense RNA 1                                               | Downregulated |
| A_22_P000 | 0.007438 | 0.00214   | -1.81 | lnc-AL020996 | lnc-AL020996.1-1:2                                                    | Downregulated |
| A_23_P381 | 0.013653 | 0.00478   | -1.81 | GGA3         | golgi-associated, gamma adaptin ear containing, ARF binding protein 3 | Downregulated |
| A_33_P330 | 0.000793 | 0.0000467 | -1.82 | RHOB         | ras homolog family member B                                           | Downregulated |
| A_33_P325 | 0.000814 | 0.0000498 | -1.82 | DPM3         | dolichyl-phosphate mannosyltransferase polypeptide 3                  | Downregulated |
| A_32_P101 | 0.00082  | 0.0000507 | -1.82 | lnc-THNSL1-2 | lnc-THNSL1-2:1                                                        | Downregulated |
| A_23_P734 | 0.000883 | 0.000059  | -1.82 | RUFY1        | RUN and FYVE domain containing 1                                      | Downregulated |
| A_22_P000 | 0.000922 | 0.0000647 | -1.82 | SLC25A30-AS1 | SLC25A30 antisense RNA 1                                              | Downregulated |
| A_23_P393 | 0.001065 | 0.000092  | -1.82 | HCST         | hematopoietic cell signal transducer                                  | Downregulated |
| A_24_P358 | 0.001312 | 0.000141  | -1.82 | GTPBP6       | GTP binding protein 6 (putative)                                      | Downregulated |
| A_33_P326 | 0.001657 | 0.000215  | -1.82 | KRTAP5-6     | keratin associated protein 5-6                                        | Downregulated |
| A_24_P409 | 0.001763 | 0.00024   | -1.82 | BCL2L13      | BCL2-like 13 (apoptosis facilitator)                                  | Downregulated |
| A_24_P315 | 0.002575 | 0.000451  | -1.82 | POM121L8P    | POM121 transmembrane nucleoporin-like 8 pseudogene                    | Downregulated |
| A_22_P000 | 0.004157 | 0.000924  | -1.82 | lnc-RP4-604K | lnc-RP4-604K5.1.1-1:1                                                 | Downregulated |
| A_24_P203 | 0.005562 | 0.00142   | -1.82 | ACAT1        | acetyl-CoA acetyltransferase 1                                        | Downregulated |
| A_24_P416 | 0.005764 | 0.00149   | -1.82 | HOXB4        | homeobox B4                                                           | Downregulated |
| A_24_P321 | 0.007357 | 0.00211   | -1.82 | TTL5         | tubulin tyrosine ligase-like family member 5                          | Downregulated |
| A_24_P156 | 0.011666 | 0.00391   | -1.82 | MPL          | MPL proto-oncogene, thrombopoietin receptor                           | Downregulated |
| A_22_P000 | 0.016458 | 0.00611   | -1.82 | lnc-NARF-1   | lnc-NARF-1:1                                                          | Downregulated |

|           |          |           |       |              |                                                                              |               |
|-----------|----------|-----------|-------|--------------|------------------------------------------------------------------------------|---------------|
| A_21_P000 | 0.024008 | 0.00977   | -1.82 | lnc-CEP68-1  | lnc-CEP68-1:2                                                                | Downregulated |
| A_21_P000 | 0.000795 | 0.0000469 | -1.83 | SLITRK5      | SLIT and NTRK-like family, member 5                                          | Downregulated |
| A_23_P240 | 0.000875 | 0.0000581 | -1.83 | IFIT2        | interferon-induced protein with tetratricopeptide repeats 2                  | Downregulated |
| A_23_P116 | 0.001065 | 0.0000919 | -1.83 | HMGB4        | high mobility group box 4                                                    | Downregulated |
| A_23_P141 | 0.001171 | 0.000113  | -1.83 | ZNF18        | zinc finger protein 18                                                       | Downregulated |
| A_22_P000 | 0.001564 | 0.000194  | -1.83 | lnc-CDK12-2  | lnc-CDK12-2:1                                                                | Downregulated |
| A_21_P000 | 0.001693 | 0.000223  | -1.83 | lnc-DCTD-1   | lnc-DCTD-1:1                                                                 | Downregulated |
| A_23_P250 | 0.001826 | 0.000256  | -1.83 | CLIP1        | CAP-GLY domain containing linker protein 1                                   | Downregulated |
| A_23_P167 | 0.002112 | 0.00033   | -1.83 | HIST1H2AC    | histone cluster 1, H2ac                                                      | Downregulated |
| A_32_P197 | 0.00293  | 0.000546  | -1.83 | ZNF697       | zinc finger protein 697                                                      | Downregulated |
| A_32_P230 | 0.003359 | 0.000677  | -1.83 | DOCK7        | dedicator of cytokinesis 7                                                   | Downregulated |
| A_33_P329 | 0.007446 | 0.00214   | -1.83 | DISP1        | dispatched homolog 1 (Drosophila)                                            | Downregulated |
| A_24_P126 | 0.021799 | 0.00864   | -1.83 | TMEM194A     | transmembrane protein 194A                                                   | Downregulated |
| A_33_P332 | 0.000792 | 0.0000463 | -1.84 | ANKLE2       | ankyrin repeat and LEM domain containing 2                                   | Downregulated |
| A_24_P117 | 0.000792 | 0.0000464 | -1.84 | LDLR         | low density lipoprotein receptor                                             | Downregulated |
| A_23_P161 | 0.000982 | 0.0000759 | -1.84 | ZDHC6        | zinc finger, DHHC-type containing 6                                          | Downregulated |
| A_24_P135 | 0.001134 | 0.000106  | -1.84 | PTPLB        | protein tyrosine phosphatase-like (proline instead of catalytic arginine), r | Downregulated |
| A_23_P350 | 0.001171 | 0.000113  | -1.84 | TRIM56       | tripartite motif containing 56                                               | Downregulated |
| A_24_P232 | 0.002012 | 0.000304  | -1.84 | SMARCD1      | SWI/SNF related, matrix associated, actin dependent regulator of chrom       | Downregulated |
| A_23_P160 | 0.003056 | 0.000584  | -1.84 | NR0B2        | nuclear receptor subfamily 0, group B, member 2                              | Downregulated |
| A_23_P298 | 0.003119 | 0.000604  | -1.84 | CBLB         | Cbl proto-oncogene B, E3 ubiquitin protein ligase                            | Downregulated |
| A_23_P302 | 0.003542 | 0.000731  | -1.84 | ERAP2        | endoplasmic reticulum aminopeptidase 2                                       | Downregulated |
| A_23_P153 | 0.006575 | 0.00181   | -1.84 | GTDC1        | glycosyltransferase-like domain containing 1                                 | Downregulated |
| A_23_P253 | 0.013477 | 0.0047    | -1.84 | GRAMD1C      | GRAM domain containing 1C                                                    | Downregulated |
| A_23_P342 | 0.035237 | 0.0157    | -1.84 | FBXW4        | F-box and WD repeat domain containing 4                                      | Downregulated |
| A_24_P472 | 0.000808 | 0.0000489 | -1.85 | ARF6         | ADP-ribosylation factor 6                                                    | Downregulated |
| A_33_P334 | 0.001085 | 0.0000959 | -1.85 | MKLN1        | muskelin 1, intracellular mediator containing kelch motifs                   | Downregulated |
| A_23_P365 | 0.001153 | 0.00011   | -1.85 | EID2         | EP300 interacting inhibitor of differentiation 2                             | Downregulated |
| A_22_P000 | 0.001157 | 0.00011   | -1.85 | LOC1019282   | uncharacterized LOC101928273                                                 | Downregulated |
| A_23_P615 | 0.001399 | 0.000159  | -1.85 | CD2BP2       | CD2 (cytoplasmic tail) binding protein 2                                     | Downregulated |
| A_23_P646 | 0.001424 | 0.000163  | -1.85 | ARHGAP9      | Rho GTPase activating protein 9                                              | Downregulated |
| A_23_P314 | 0.001427 | 0.000164  | -1.85 | ERVW-1       | endogenous retrovirus group W, member 1                                      | Downregulated |
| A_23_P386 | 0.001537 | 0.000188  | -1.85 | TWISTNB      | TWIST neighbor                                                               | Downregulated |
| A_23_P390 | 0.001558 | 0.000193  | -1.85 | WDR83        | WD repeat domain 83                                                          | Downregulated |
| A_21_P000 | 0.002016 | 0.000305  | -1.85 | lnc-SLC2A9-1 | lnc-SLC2A9-1:1                                                               | Downregulated |
| A_24_P248 | 0.003749 | 0.000795  | -1.85 | ACSL3        | acyl-CoA synthetase long-chain family member 3                               | Downregulated |
| A_33_P336 | 0.006501 | 0.00178   | -1.85 | CDC27        | cell division cycle 27                                                       | Downregulated |

|           |          |           |       |             |                                                                            |               |
|-----------|----------|-----------|-------|-------------|----------------------------------------------------------------------------|---------------|
| A_33_P324 | 0.007142 | 0.00203   | -1.85 | PKN2        | protein kinase N2                                                          | Downregulated |
| A_22_P000 | 0.014655 | 0.00526   | -1.85 | lnc-PAPLN-1 | lnc-PAPLN-1:1                                                              | Downregulated |
| A_23_P200 | 0.01581  | 0.00579   | -1.85 | HYI         | hydroxypyruvate isomerase (putative)                                       | Downregulated |
| A_23_P116 | 0.019336 | 0.00746   | -1.85 | SPRR2D      | small proline-rich protein 2D                                              | Downregulated |
| A_23_P833 | 0.000776 | 0.0000439 | -1.86 | ENG         | endoglin                                                                   | Downregulated |
| A_23_P258 | 0.000853 | 0.0000548 | -1.86 | MRPS17      | mitochondrial ribosomal protein S17                                        | Downregulated |
| A_23_P169 | 0.0009   | 0.0000612 | -1.86 | ANXA4       | annexin A4                                                                 | Downregulated |
| A_24_P329 | 0.000913 | 0.0000638 | -1.86 | TSC1        | tuberous sclerosis 1                                                       | Downregulated |
| A_23_P102 | 0.000947 | 0.0000693 | -1.86 | CXCR4       | chemokine (C-X-C motif) receptor 4                                         | Downregulated |
| A_23_P378 | 0.001215 | 0.000122  | -1.86 | STUB1       | STIP1 homology and U-box containing protein 1, E3 ubiquitin protein ligase | Downregulated |
| A_33_P324 | 0.001453 | 0.000171  | -1.86 | SNORA23     | small nucleolar RNA, H/ACA box 23                                          | Downregulated |
| A_33_P334 | 0.001839 | 0.000259  | -1.86 | lnc-WWP2-1  | lnc-WWP2-1:1                                                               | Downregulated |
| A_23_P455 | 0.001916 | 0.000278  | -1.86 | PPP2R3B     | protein phosphatase 2, regulatory subunit B", beta                         | Downregulated |
| A_33_P320 | 0.002033 | 0.00031   | -1.86 | RASGRP2     | RAS guanyl releasing protein 2 (calcium and DAG-regulated)                 | Downregulated |
| A_23_P153 | 0.002242 | 0.000365  | -1.86 | PPP5C       | protein phosphatase 5, catalytic subunit                                   | Downregulated |
| A_23_P232 | 0.00261  | 0.000459  | -1.86 | BLZF1       | basic leucine zipper nuclear factor 1                                      | Downregulated |
| A_21_P001 | 0.006435 | 0.00175   | -1.86 | LINC01474   | long intergenic non-protein coding RNA 1474                                | Downregulated |
| A_23_P174 | 0.02294  | 0.00921   | -1.86 | TMEM230     | transmembrane protein 230                                                  | Downregulated |
| A_33_P324 | 0.000786 | 0.0000453 | -1.87 | ZNF346      | zinc finger protein 346                                                    | Downregulated |
| A_23_P372 | 0.001007 | 0.0000813 | -1.87 | CIPC        | CLOCK-interacting pacemaker                                                | Downregulated |
| A_33_P323 | 0.00174  | 0.000234  | -1.87 | ANKRD54     | ankyrin repeat domain 54                                                   | Downregulated |
| A_23_P418 | 0.0018   | 0.000248  | -1.87 | C11orf65    | chromosome 11 open reading frame 65                                        | Downregulated |
| A_23_P359 | 0.001947 | 0.000285  | -1.87 | DNAH2       | dynein, axonemal, heavy chain 2                                            | Downregulated |
| A_21_P000 | 0.002166 | 0.000345  | -1.87 | SAP30L-AS1  | SAP30L antisense RNA 1 (head to head)                                      | Downregulated |
| A_23_P310 | 0.002855 | 0.000526  | -1.87 | C19orf52    | chromosome 19 open reading frame 52                                        | Downregulated |
| A_24_P568 | 0.003011 | 0.000571  | -1.87 | CRLF3       | cytokine receptor-like factor 3                                            | Downregulated |
| A_23_P211 | 0.003846 | 0.000826  | -1.87 | ABHD6       | abhydrolase domain containing 6                                            | Downregulated |
| A_33_P328 | 0.005623 | 0.00144   | -1.87 | PLCL1       | phospholipase C-like 1                                                     | Downregulated |
| A_21_P000 | 0.00872  | 0.00266   | -1.87 | CNPY2       | canopy FGF signaling regulator 2                                           | Downregulated |
| A_22_P000 | 0.010142 | 0.00326   | -1.87 | lnc-TMEM14E | lnc-TMEM14E-2:1                                                            | Downregulated |
| A_22_P000 | 0.015057 | 0.00545   | -1.87 | lnc-PHC3-1  | lnc-PHC3-1:1                                                               | Downregulated |
| A_21_P001 | 0.000801 | 0.0000478 | -1.88 | PLA2G10     | phospholipase A2, group X                                                  | Downregulated |
| A_23_P323 | 0.000819 | 0.0000505 | -1.88 | PPP1CA      | protein phosphatase 1, catalytic subunit, alpha isozyme                    | Downregulated |
| A_23_P351 | 0.000839 | 0.000053  | -1.88 | ALG6        | ALG6, alpha-1,3-glucosyltransferase                                        | Downregulated |
| A_33_P337 | 0.000977 | 0.0000753 | -1.88 | KLHDC4      | kelch domain containing 4                                                  | Downregulated |
| A_33_P333 | 0.001112 | 0.000102  | -1.88 | GOLGA2P5    | golgin A2 pseudogene 5                                                     | Downregulated |
| A_23_P830 | 0.001171 | 0.000113  | -1.88 | TLE4        | transducin-like enhancer of split 4                                        | Downregulated |



|           |          |           |       |                        |                                                                         |               |
|-----------|----------|-----------|-------|------------------------|-------------------------------------------------------------------------|---------------|
| A_23_P323 | 0.001211 | 0.000121  | -1.88 | LYRM4                  | LYR motif containing 4                                                  | Downregulated |
| A_33_P339 | 0.001227 | 0.000124  | -1.88 | INO80E                 | INO80 complex subunit E                                                 | Downregulated |
| A_24_P192 | 0.001688 | 0.000222  | -1.88 | FADS1                  | fatty acid desaturase 1                                                 | Downregulated |
| A_21_P000 | 0.001816 | 0.000254  | -1.88 | PITPNA-AS1             | PITPNA antisense RNA 1                                                  | Downregulated |
| A_24_P651 | 0.002219 | 0.000358  | -1.88 | CDK10                  | cyclin-dependent kinase 10                                              | Downregulated |
| A_32_P141 | 0.00302  | 0.000574  | -1.88 | COMMD7                 | COMM domain containing 7                                                | Downregulated |
| A_33_P339 | 0.003103 | 0.000599  | -1.88 | FAM168B                | family with sequence similarity 168, member B                           | Downregulated |
| A_22_P000 | 0.003421 | 0.000694  | -1.88 | lnc-PKN2-1             | lnc-PKN2-1:1                                                            | Downregulated |
| A_24_P712 | 0.00383  | 0.000821  | -1.88 | PIK3CD                 | phosphatidylinositol-4,5-bisphosphate 3-kinase, catalytic subunit delta | Downregulated |
| A_33_P329 | 0.005674 | 0.00146   | -1.88 | C11orf49               | chromosome 11 open reading frame 49                                     | Downregulated |
| A_21_P000 | 0.009704 | 0.00307   | -1.88 | MAPKAPK5- <del>l</del> | MAPKAPK5 antisense RNA 1                                                | Downregulated |
| A_23_P159 | 0.012122 | 0.0041    | -1.88 | CD8B                   | CD8b molecule                                                           | Downregulated |
| A_23_P831 | 0.016087 | 0.00592   | -1.88 | CDK5RAP2               | CDK5 regulatory subunit associated protein 2                            | Downregulated |
| A_33_P324 | 0.000752 | 0.0000408 | -1.89 | SLC39A4                | solute carrier family 39 (zinc transporter), member 4                   | Downregulated |
| A_33_P322 | 0.000763 | 0.000042  | -1.89 | SNORD3B-1              | small nucleolar RNA, C/D box 3B-1                                       | Downregulated |
| A_22_P000 | 0.000799 | 0.0000474 | -1.89 | lnc-CENPBD1            | lnc-CENPBD1-1:1                                                         | Downregulated |
| A_23_P570 | 0.000905 | 0.0000621 | -1.89 | STAU1                  | staufen double-stranded RNA binding protein 1                           | Downregulated |
| A_23_P383 | 0.000995 | 0.0000783 | -1.89 | DHX58                  | DEXH (Asp-Glu-X-His) box polypeptide 58                                 | Downregulated |
| A_23_P322 | 0.001026 | 0.0000843 | -1.89 | EFNA4                  | ephrin-A4                                                               | Downregulated |
| A_23_P415 | 0.001067 | 0.0000927 | -1.89 | PRMT9                  | protein arginine methyltransferase 9                                    | Downregulated |
| A_33_P323 | 0.001359 | 0.00015   | -1.89 | EDEM3                  | ER degradation enhancer, mannosidase alpha-like 3                       | Downregulated |
| A_21_P001 | 0.001563 | 0.000194  | -1.89 | LOC285638              | uncharacterized LOC285638                                               | Downregulated |
| A_23_P425 | 0.002871 | 0.00053   | -1.89 | MED11                  | mediator complex subunit 11                                             | Downregulated |
| A_22_P000 | 0.004984 | 0.00121   | -1.89 | CDK3                   | cyclin-dependent kinase 3                                               | Downregulated |
| A_32_P221 | 0.005249 | 0.0013    | -1.89 | RRP15                  | ribosomal RNA processing 15 homolog (S. cerevisiae)                     | Downregulated |
| A_33_P321 | 0.006496 | 0.00177   | -1.89 | RFC3                   | replication factor C (activator 1) 3, 38kDa                             | Downregulated |
| A_23_P103 | 0.025445 | 0.0105    | -1.89 | TTC13                  | tetratricopeptide repeat domain 13                                      | Downregulated |
| A_33_P329 | 0.026117 | 0.0109    | -1.89 | PRRC2B                 | proline-rich coiled-coil 2B                                             | Downregulated |
| A_23_P118 | 0.000919 | 0.0000645 | -1.9  | FAHD1                  | fumarylacetoacetate hydrolase domain containing 1                       | Downregulated |
| A_24_P380 | 0.000949 | 0.0000696 | -1.9  | SMAP1                  | small ArfGAP 1                                                          | Downregulated |
| A_24_P262 | 0.001062 | 0.0000912 | -1.9  | DDA1                   | DET1 and DDB1 associated 1                                              | Downregulated |
| A_24_P445 | 0.00121  | 0.000121  | -1.9  | MON1B                  | MON1 secretory trafficking family member B                              | Downregulated |
| A_23_P131 | 0.002149 | 0.000341  | -1.9  | MANBAL                 | mannosidase, beta A, lysosomal-like                                     | Downregulated |
| A_24_P394 | 0.002786 | 0.000506  | -1.9  | SFXN1                  | sideroflexin 1                                                          | Downregulated |
| A_23_P300 | 0.002804 | 0.000511  | -1.9  | CCNY                   | cyclin Y                                                                | Downregulated |
| A_33_P337 | 0.004435 | 0.00102   | -1.9  | NR2C2                  | nuclear receptor subfamily 2, group C, member 2                         | Downregulated |
| A_23_P621 | 0.027476 | 0.0116    | -1.9  | ZC4H2                  | zinc finger, C4H2 domain containing                                     | Downregulated |

|           |          |           |       |              |                                                                         |               |
|-----------|----------|-----------|-------|--------------|-------------------------------------------------------------------------|---------------|
| A_23_P119 | 0.000758 | 0.0000414 | -1.91 | EMP3         | epithelial membrane protein 3                                           | Downregulated |
| A_33_P339 | 0.00076  | 0.0000416 | -1.91 | POLR2G       | polymerase (RNA) II (DNA directed) polypeptide G                        | Downregulated |
| A_22_P000 | 0.000764 | 0.0000422 | -1.91 | lnc-SYNC-2   | lnc-SYNC-2:1                                                            | Downregulated |
| A_23_P259 | 0.000788 | 0.0000457 | -1.91 | ZBP1         | Z-DNA binding protein 1                                                 | Downregulated |
| A_23_P745 | 0.000788 | 0.0000458 | -1.91 | CD53         | CD53 molecule                                                           | Downregulated |
| A_23_P318 | 0.000838 | 0.0000528 | -1.91 | ZAK          | sterile alpha motif and leucine zipper containing kinase AZK            | Downregulated |
| A_23_P253 | 0.000853 | 0.0000549 | -1.91 | AUP1         | ancient ubiquitous protein 1                                            | Downregulated |
| A_23_P205 | 0.000875 | 0.0000582 | -1.91 | ABHD4        | abhydrolase domain containing 4                                         | Downregulated |
| A_22_P000 | 0.000909 | 0.0000631 | -1.91 | DPYS         | dihydropyrimidinase                                                     | Downregulated |
| A_32_P184 | 0.000961 | 0.000072  | -1.91 | ARID5B       | AT rich interactive domain 5B (MRF1-like)                               | Downregulated |
| A_23_P127 | 0.000964 | 0.0000728 | -1.91 | TUBGCP2      | tubulin, gamma complex associated protein 2                             | Downregulated |
| A_24_P205 | 0.001079 | 0.0000949 | -1.91 | ACOT7        | acyl-CoA thioesterase 7                                                 | Downregulated |
| A_33_P386 | 0.001187 | 0.000116  | -1.91 | TRABD        | TraB domain containing                                                  | Downregulated |
| A_32_P358 | 0.001243 | 0.000128  | -1.91 | ICE1         | interactor of little elongation complex ELL subunit 1                   | Downregulated |
| A_32_P163 | 0.001851 | 0.000262  | -1.91 | SPDYE3       | speedy/RINGO cell cycle regulator family member E3                      | Downregulated |
| A_33_P339 | 0.001987 | 0.000297  | -1.91 | SMG1         | SMG1 phosphatidylinositol 3-kinase-related kinase                       | Downregulated |
| A_22_P000 | 0.002956 | 0.000555  | -1.91 | ZRANB1       | zinc finger, RAN-binding domain containing 1                            | Downregulated |
| A_24_P387 | 0.003163 | 0.000618  | -1.91 | PKN2         | protein kinase N2                                                       | Downregulated |
| A_24_P282 | 0.049228 | 0.0236    | -1.91 | ABL1         | ABL proto-oncogene 1, non-receptor tyrosine kinase                      | Downregulated |
| A_33_P328 | 0.000739 | 0.0000392 | -1.92 | IGFL1        | IGF-like family member 1                                                | Downregulated |
| A_33_P325 | 0.001087 | 0.0000963 | -1.92 | MAPKAP1      | mitogen-activated protein kinase associated protein 1                   | Downregulated |
| A_33_P323 | 0.001376 | 0.000153  | -1.92 | TET2         | tet methylcytosine dioxygenase 2                                        | Downregulated |
| A_24_P368 | 0.001756 | 0.000238  | -1.92 | ARL10        | ADP-ribosylation factor-like 10                                         | Downregulated |
| A_32_P112 | 0.003657 | 0.000766  | -1.92 | CTF8         | CTF8, chromosome transmission fidelity factor 8 homolog (S. cerevisiae) | Downregulated |
| A_32_P100 | 0.004771 | 0.00113   | -1.92 | LOC1019279   | uncharacterized LOC101927974                                            | Downregulated |
| A_33_P334 | 0.006202 | 0.00166   | -1.92 | MGME1        | mitochondrial genome maintenance exonuclease 1                          | Downregulated |
| A_23_P567 | 0.006349 | 0.00172   | -1.92 | HNMT         | histamine N-methyltransferase                                           | Downregulated |
| A_33_P322 | 0.012104 | 0.0041    | -1.92 | NAT8B        | N-acetyltransferase 8B (GCN5-related, putative, gene/pseudogene)        | Downregulated |
| A_22_P000 | 0.01765  | 0.00666   | -1.92 | ZBTB20-AS1   | ZBTB20 antisense RNA 1                                                  | Downregulated |
| A_22_P000 | 0.000807 | 0.0000487 | -1.93 | lnc-SLC15A1  | lnc-SLC15A1-1:1                                                         | Downregulated |
| A_33_P328 | 0.000821 | 0.0000509 | -1.93 | RASA2        | RAS p21 protein activator 2                                             | Downregulated |
| A_23_P153 | 0.001069 | 0.0000936 | -1.93 | RALBP1       | ralA binding protein 1                                                  | Downregulated |
| A_23_P989 | 0.001108 | 0.000101  | -1.93 | LRMP         | lymphoid-restricted membrane protein                                    | Downregulated |
| A_33_P383 | 0.001333 | 0.000145  | -1.93 | POU2F2       | POU class 2 homeobox 2                                                  | Downregulated |
| A_23_P888 | 0.001543 | 0.000189  | -1.93 | DEF8         | differentially expressed in FDCP 8 homolog (mouse)                      | Downregulated |
| A_22_P000 | 0.001688 | 0.000222  | -1.93 | lnc-C17orf48 | lnc-C17orf48-1:1                                                        | Downregulated |
| A_33_P323 | 0.002908 | 0.000541  | -1.93 | FAM216A      | family with sequence similarity 216, member A                           | Downregulated |

|           |          |           |       |                |                                                                                   |               |
|-----------|----------|-----------|-------|----------------|-----------------------------------------------------------------------------------|---------------|
| A_23_P105 | 0.003609 | 0.000752  | -1.93 | APPL2          | adaptor protein, phosphotyrosine interaction, PH domain and leucine zipper domain | Downregulated |
| A_22_P000 | 0.003609 | 0.000752  | -1.93 | lnc-DBN1-1     | lnc-DBN1-1:1                                                                      | Downregulated |
| A_33_P335 | 0.004373 | 0.001     | -1.93 | CCSAP          | centriole, cilia and spindle-associated protein                                   | Downregulated |
| A_21_P001 | 0.004493 | 0.00104   | -1.93 | LOC285626      | uncharacterized LOC285626                                                         | Downregulated |
| A_23_P530 | 0.0046   | 0.00107   | -1.93 | ZNF215         | zinc finger protein 215                                                           | Downregulated |
| A_23_P145 | 0.005651 | 0.00145   | -1.93 | TPK1           | thiamin pyrophosphokinase 1                                                       | Downregulated |
| A_22_P000 | 0.006986 | 0.00196   | -1.93 | lnc-DDI1-1     | lnc-DDI1-1:1                                                                      | Downregulated |
| A_22_P000 | 0.01198  | 0.00404   | -1.93 | LOC1019285     | uncharacterized LOC101928573                                                      | Downregulated |
| A_33_P322 | 0.025791 | 0.0107    | -1.93 | ERCC1          | excision repair cross-complementation group 1                                     | Downregulated |
| A_21_P001 | 0.026743 | 0.0112    | -1.93 | XLOC_I2_014814 |                                                                                   | Downregulated |
| A_23_P666 | 0.000837 | 0.0000528 | -1.94 | EVI2B          | ecotropic viral integration site 2B                                               | Downregulated |
| A_33_P334 | 0.000864 | 0.0000568 | -1.94 | APTX           | aprataxin                                                                         | Downregulated |
| A_24_P237 | 0.000887 | 0.0000596 | -1.94 | SASH3          | SAM and SH3 domain containing 3                                                   | Downregulated |
| A_21_P000 | 0.000915 | 0.0000641 | -1.94 | lnc-TMCC1-4    | lnc-TMCC1-4:1                                                                     | Downregulated |
| A_33_P328 | 0.000971 | 0.000074  | -1.94 | TRAF3IP3       | TRAF3 interacting protein 3                                                       | Downregulated |
| A_23_P700 | 0.000998 | 0.0000797 | -1.94 | PPAP2A         | phosphatidic acid phosphatase type 2A                                             | Downregulated |
| A_33_P329 | 0.001297 | 0.000138  | -1.94 | PLK1           | polo-like kinase 1                                                                | Downregulated |
| A_23_P417 | 0.00165  | 0.000213  | -1.94 | IRF1           | interferon regulatory factor 1                                                    | Downregulated |
| A_32_P201 | 0.001706 | 0.000228  | -1.94 | AMMECR1        | Alport syndrome, mental retardation, midface hypoplasia and elliptocytosis 1      | Downregulated |
| A_33_P333 | 0.003798 | 0.00081   | -1.94 | LOC1001320     | uncharacterized LOC100132077                                                      | Downregulated |
| A_33_P337 | 0.004648 | 0.00109   | -1.94 | DYNC1LI2       | dynein, cytoplasmic 1, light intermediate chain 2                                 | Downregulated |
| A_23_P195 | 0.004644 | 0.00109   | -1.94 | TMEM223        | transmembrane protein 223                                                         | Downregulated |
| A_22_P000 | 0.005219 | 0.00129   | -1.94 | lnc-PCYOX1L    | lnc-PCYOX1L-1:1                                                                   | Downregulated |
| A_23_P138 | 0.006706 | 0.00185   | -1.94 | GPN2           | GPN-loop GTPase 2                                                                 | Downregulated |
| A_23_P765 | 0.000712 | 0.0000358 | -1.95 | ITGB7          | integrin, beta 7                                                                  | Downregulated |
| A_24_P100 | 0.000801 | 0.0000476 | -1.95 | BCAS3          | breast carcinoma amplified sequence 3                                             | Downregulated |
| A_23_P373 | 0.000805 | 0.0000484 | -1.95 | CIDEB          | cell death-inducing DFFA-like effector b                                          | Downregulated |
| A_23_P409 | 0.000808 | 0.0000489 | -1.95 | FAM83C         | family with sequence similarity 83, member C                                      | Downregulated |
| A_21_P001 | 0.000814 | 0.0000501 | -1.95 | EBLN3          | endogenous Bornavirus-like nucleoprotein 3                                        | Downregulated |
| A_23_P167 | 0.001055 | 0.0000898 | -1.95 | CENPC          | centromere protein C                                                              | Downregulated |
| A_22_P000 | 0.001086 | 0.0000962 | -1.95 | lnc-NPDC1-1    | lnc-NPDC1-1:1                                                                     | Downregulated |
| A_23_P630 | 0.001398 | 0.000158  | -1.95 | CERS2          | ceramide synthase 2                                                               | Downregulated |
| A_24_P119 | 0.001453 | 0.000171  | -1.95 | MYH15          | myosin, heavy chain 15                                                            | Downregulated |
| A_23_P147 | 0.001563 | 0.000194  | -1.95 | RAB33A         | RAB33A, member RAS oncogene family                                                | Downregulated |
| A_23_P242 | 0.001626 | 0.000208  | -1.95 | MAGOHB         | mago-nashi homolog B (Drosophila)                                                 | Downregulated |
| A_21_P000 | 0.001812 | 0.000252  | -1.95 | C5orf56        | chromosome 5 open reading frame 56                                                | Downregulated |
| A_33_P330 | 0.002361 | 0.000394  | -1.95 | ANKRD30BL      | ankyrin repeat domain 30B-like                                                    | Downregulated |

|           |          |           |       |               |                                                                   |               |
|-----------|----------|-----------|-------|---------------|-------------------------------------------------------------------|---------------|
| A_32_P269 | 0.003101 | 0.000599  | -1.95 | ERICH1        | glutamate-rich 1                                                  | Downregulated |
| A_33_P334 | 0.006483 | 0.00177   | -1.95 | CEP83         | centrosomal protein 83kDa                                         | Downregulated |
| A_33_P359 | 0.007304 | 0.00209   | -1.95 | HABP4         | hyaluronan binding protein 4                                      | Downregulated |
| A_23_P170 | 0.00796  | 0.00235   | -1.95 | ZNF692        | zinc finger protein 692                                           | Downregulated |
| A_32_P178 | 0.013227 | 0.00458   | -1.95 | C16orf86      | chromosome 16 open reading frame 86                               | Downregulated |
| A_22_P000 | 0.01384  | 0.00486   | -1.95 | lnc-RP11-43C  | lnc-RP11-43D2.2.1-3:1                                             | Downregulated |
| A_21_P000 | 0.01384  | 0.00486   | -1.95 | SNORD119      | small nucleolar RNA, C/D box 119                                  | Downregulated |
| A_33_P329 | 0.021484 | 0.00848   | -1.95 | ASB14         | ankyrin repeat and SOCS box containing 14                         | Downregulated |
| A_23_P324 | 0.000963 | 0.0000726 | -1.96 | KIAA0355      | KIAA0355                                                          | Downregulated |
| A_21_P000 | 0.001107 | 0.000101  | -1.96 | FLJ42351      | uncharacterized LOC400999                                         | Downregulated |
| A_23_P333 | 0.001274 | 0.000134  | -1.96 | ERGIC1        | endoplasmic reticulum-golgi intermediate compartment (ERGIC) 1    | Downregulated |
| A_21_P001 | 0.001395 | 0.000157  | -1.96 | LOC1001281    | uncharacterized LOC100128108                                      | Downregulated |
| A_24_P108 | 0.001693 | 0.000223  | -1.96 | KCTD17        | potassium channel tetramerization domain containing 17            | Downregulated |
| A_22_P000 | 0.001918 | 0.000278  | -1.96 | lnc-DLL1-3    | lnc-DLL1-3:1                                                      | Downregulated |
| A_21_P000 | 0.003228 | 0.000637  | -1.96 | lnc-C12orf74- | lnc-C12orf74-1:1                                                  | Downregulated |
| A_33_P341 | 0.004718 | 0.00112   | -1.96 | PLXNA3        | plexin A3                                                         | Downregulated |
| A_33_P322 | 0.009494 | 0.00298   | -1.96 | AMER1         | APC membrane recruitment protein 1                                | Downregulated |
| A_33_P329 | 0.009651 | 0.00305   | -1.96 | PTPRCAP       | protein tyrosine phosphatase, receptor type, C-associated protein | Downregulated |
| A_22_P000 | 0.013095 | 0.00453   | -1.96 | lnc-NPIPL2-2  | lnc-NPIPL2-2:1                                                    | Downregulated |
| A_22_P000 | 0.000707 | 0.0000342 | -1.97 | lnc-TSPYL2-2  | lnc-TSPYL2-2:1                                                    | Downregulated |
| A_23_P975 | 0.000718 | 0.0000368 | -1.97 | VAMP3         | vesicle-associated membrane protein 3                             | Downregulated |
| A_22_P000 | 0.000758 | 0.0000414 | -1.97 | LOC1027245    | uncharacterized LOC102724508                                      | Downregulated |
| A_33_P324 | 0.001015 | 0.0000824 | -1.97 | CAMK2N2       | calcium/calmodulin-dependent protein kinase II inhibitor 2        | Downregulated |
| A_22_P000 | 0.00115  | 0.000109  | -1.97 | lnc-LUZP1-1   | lnc-LUZP1-1:1                                                     | Downregulated |
| A_23_P211 | 0.001262 | 0.000132  | -1.97 | PAXBP1        | PAX3 and PAX7 binding protein 1                                   | Downregulated |
| A_33_P334 | 0.001562 | 0.000194  | -1.97 | TBL1X         | transducin (beta)-like 1X-linked                                  | Downregulated |
| A_24_P402 | 0.001647 | 0.000213  | -1.97 | ITM2C         | integral membrane protein 2C                                      | Downregulated |
| A_32_P231 | 0.003469 | 0.000708  | -1.97 | GOLGA6L9      | golgin A6 family-like 9                                           | Downregulated |
| A_33_P337 | 0.004031 | 0.000882  | -1.97 | LOC1002708    | uncharacterized LOC100270804                                      | Downregulated |
| A_32_P170 | 0.005106 | 0.00125   | -1.97 | POLA1         | polymerase (DNA directed), alpha 1, catalytic subunit             | Downregulated |
| A_32_P721 | 0.014802 | 0.00533   | -1.97 | LINC00669     | long intergenic non-protein coding RNA 669                        | Downregulated |
| A_23_P209 | 0.016063 | 0.00591   | -1.97 | COLGALT1      | collagen beta(1-O)galactosyltransferase 1                         | Downregulated |
| A_22_P000 | 0.01721  | 0.00646   | -1.97 | lnc-CCDC69-1  | lnc-CCDC69-1:1                                                    | Downregulated |
| A_23_P108 | 0.022843 | 0.00916   | -1.97 | TJP3          | tight junction protein 3                                          | Downregulated |
| A_21_P000 | 0.038546 | 0.0176    | -1.97 | lnc-RPS7-1    | lnc-RPS7-1:6                                                      | Downregulated |
| A_24_P342 | 0.000709 | 0.000035  | -1.98 | RERE          | arginine-glutamic acid dipeptide (RE) repeats                     | Downregulated |
| A_33_P326 | 0.000752 | 0.0000407 | -1.98 | CECR1         | cat eye syndrome chromosome region, candidate 1                   | Downregulated |

|           |          |           |       |              |                                                                              |               |
|-----------|----------|-----------|-------|--------------|------------------------------------------------------------------------------|---------------|
| A_24_P322 | 0.000766 | 0.0000427 | -1.98 | IL10RB       | interleukin 10 receptor, beta                                                | Downregulated |
| A_33_P321 | 0.001006 | 0.0000808 | -1.98 | SEC13        | SEC13 homolog (S. cerevisiae)                                                | Downregulated |
| A_24_P108 | 0.001068 | 0.0000932 | -1.98 | RTTN         | rotatin                                                                      | Downregulated |
| A_21_P000 | 0.001235 | 0.000126  | -1.98 | lnc-RP11-736 | lnc-RP11-736N17.6.1-1:1                                                      | Downregulated |
| A_23_P430 | 0.001313 | 0.000141  | -1.98 | ELP3         | elongator acetyltransferase complex subunit 3                                | Downregulated |
| A_24_P233 | 0.001342 | 0.000147  | -1.98 | CEPT1        | choline/ethanolamine phosphotransferase 1                                    | Downregulated |
| A_23_P639 | 0.001913 | 0.000277  | -1.98 | WDR11        | WD repeat domain 11                                                          | Downregulated |
| A_24_P244 | 0.002199 | 0.000354  | -1.98 | BSCL2        | Berardinelli-Seip congenital lipodystrophy 2 (seipin)                        | Downregulated |
| A_33_P341 | 0.00608  | 0.00161   | -1.98 | ADAL         | adenosine deaminase-like                                                     | Downregulated |
| A_22_P000 | 0.010112 | 0.00325   | -1.98 | lnc-SZT2-2   | lnc-SZT2-2:1                                                                 | Downregulated |
| A_33_P335 | 0.000707 | 0.000034  | -1.99 | ITGA4        | integrin, alpha 4 (antigen CD49D, alpha 4 subunit of VLA-4 receptor)         | Downregulated |
| A_23_P357 | 0.000737 | 0.0000388 | -1.99 | APOBEC3F     | apolipoprotein B mRNA editing enzyme, catalytic polypeptide-like 3F          | Downregulated |
| A_23_P273 | 0.000931 | 0.0000664 | -1.99 | SMAD4        | SMAD family member 4                                                         | Downregulated |
| A_19_P003 | 0.000945 | 0.000069  | -1.99 | WDFY4        | WDFY family member 4                                                         | Downregulated |
| A_22_P000 | 0.000995 | 0.0000788 | -1.99 | lnc-MED10-5  | lnc-MED10-5:1                                                                | Downregulated |
| A_24_P636 | 0.001085 | 0.0000959 | -1.99 | STK17B       | serine/threonine kinase 17b                                                  | Downregulated |
| A_21_P000 | 0.001395 | 0.000157  | -1.99 | lnc-SELV.1-1 | lnc-SELV.1-1:1                                                               | Downregulated |
| A_21_P000 | 0.002068 | 0.000319  | -1.99 | lnc-SHH-1    | lnc-SHH-1:1                                                                  | Downregulated |
| A_33_P384 | 0.002566 | 0.000447  | -1.99 | SLC25A15     | solute carrier family 25 (mitochondrial carrier; ornithine transporter) memt | Downregulated |
| A_33_P329 | 0.002995 | 0.000567  | -1.99 | LINC00894    | long intergenic non-protein coding RNA 894                                   | Downregulated |
| A_21_P001 | 0.00452  | 0.00105   | -1.99 | C19orf68     | chromosome 19 open reading frame 68                                          | Downregulated |
| A_33_P335 | 0.005261 | 0.00131   | -1.99 | GPATCH2      | G patch domain containing 2                                                  | Downregulated |
| A_33_P322 | 0.011775 | 0.00396   | -1.99 | CD8A         | CD8a molecule                                                                | Downregulated |
| A_23_P255 | 0.00082  | 0.0000508 | -2    | CCDC109B     | coiled-coil domain containing 109B                                           | Downregulated |
| A_23_P133 | 0.000848 | 0.0000544 | -2    | MRPS27       | mitochondrial ribosomal protein S27                                          | Downregulated |
| A_23_P356 | 0.000912 | 0.0000636 | -2    | FBXO11       | F-box protein 11                                                             | Downregulated |
| A_19_P003 | 0.000995 | 0.000078  | -2    | SCARNA16     | small Cajal body-specific RNA 16                                             | Downregulated |
| A_22_P000 | 0.001041 | 0.0000868 | -2    | lnc-PINK1-2  | lnc-PINK1-2:1                                                                | Downregulated |
| A_33_P326 | 0.001098 | 0.0000988 | -2    | ABHD17B      | abhydrolase domain containing 17B                                            | Downregulated |
| A_33_P339 | 0.00112  | 0.000103  | -2    | RPS27        | ribosomal protein S27                                                        | Downregulated |
| A_22_P000 | 0.001172 | 0.000113  | -2    | lnc-NOS2-2   | lnc-NOS2-2:1                                                                 | Downregulated |
| A_23_P213 | 0.001178 | 0.000114  | -2    | PALLD        | palladin, cytoskeletal associated protein                                    | Downregulated |
| A_24_P475 | 0.001469 | 0.000174  | -2    | OPA3         | optic atrophy 3 (autosomal recessive, with chorea and spastic paraplegi      | Downregulated |
| A_23_P244 | 0.001695 | 0.000224  | -2    | DHCR7        | 7-dehydrocholesterol reductase                                               | Downregulated |
| A_33_P336 | 0.001946 | 0.000285  | -2    | QKI          | QKI, KH domain containing, RNA binding                                       | Downregulated |
| A_22_P000 | 0.004668 | 0.0011    | -2    | lnc-AGMAT-1  | lnc-AGMAT-1:1                                                                | Downregulated |
| A_22_P000 | 0.010871 | 0.00355   | -2    | LOC1019296   | uncharacterized LOC101929641                                                 | Downregulated |

|           |          |           |       |                |                                                                        |               |
|-----------|----------|-----------|-------|----------------|------------------------------------------------------------------------|---------------|
| A_22_P000 | 0.015182 | 0.0055    | -2    | Inc-TRIM63-1   | Inc-TRIM63-1:1                                                         | Downregulated |
| A_33_P326 | 0.016602 | 0.00618   | -2    | OR2D3          | olfactory receptor, family 2, subfamily D, member 3                    | Downregulated |
| A_23_P351 | 0.017088 | 0.0064    | -2    | NPHP4          | nephronophthisis 4                                                     | Downregulated |
| A_23_P799 | 0.021538 | 0.00851   | -2    | PSMF1          | proteasome (prosome, macropain) inhibitor subunit 1 (PI31)             | Downregulated |
| A_23_P122 | 0.022882 | 0.00918   | -2    | TAF6           | TAF6 RNA polymerase II, TATA box binding protein (TBP)-associated fa   | Downregulated |
| A_24_P182 | 0.024104 | 0.00982   | -2    | KCNAB1         | potassium channel, voltage gated subfamily A regulatory beta subunit 1 | Downregulated |
| A_23_P320 | 0.000707 | 0.0000341 | -2.01 | MEF2C          | myocyte enhancer factor 2C                                             | Downregulated |
| A_23_P125 | 0.00072  | 0.000037  | -2.01 | TRAPPC1        | trafficking protein particle complex 1                                 | Downregulated |
| A_33_P334 | 0.000814 | 0.00005   | -2.01 | POMC           | proopiomelanocortin                                                    | Downregulated |
| A_23_P131 | 0.000883 | 0.0000592 | -2.01 | PIGF           | phosphatidylinositol glycan anchor biosynthesis, class F               | Downregulated |
| A_33_P331 | 0.000909 | 0.000063  | -2.01 | PXYLP1         | 2-phosphoxylose phosphatase 1                                          | Downregulated |
| A_23_P403 | 0.001035 | 0.0000858 | -2.01 | MAPRE1         | microtubule-associated protein, RP/EB family, member 1                 | Downregulated |
| A_23_P217 | 0.001265 | 0.000132  | -2.01 | IDS            | iduronate 2-sulfatase                                                  | Downregulated |
| A_24_P717 | 0.001453 | 0.00017   | -2.01 | DIP2A          | DIP2 disco-interacting protein 2 homolog A (Drosophila)                | Downregulated |
| A_23_P119 | 0.001453 | 0.00017   | -2.01 | TTC32          | tetratricopeptide repeat domain 32                                     | Downregulated |
| A_23_P133 | 0.00174  | 0.000234  | -2.01 | PREP           | prolyl endopeptidase                                                   | Downregulated |
| A_24_P298 | 0.002112 | 0.00033   | -2.01 | PRMT5          | protein arginine methyltransferase 5                                   | Downregulated |
| A_33_P334 | 0.017831 | 0.00674   | -2.01 | TLCD2          | TLC domain containing 2                                                | Downregulated |
| A_23_P396 | 0.000792 | 0.0000465 | -2.02 | TBC1D2B        | TBC1 domain family, member 2B                                          | Downregulated |
| A_33_P321 | 0.000799 | 0.0000473 | -2.02 | DGKQ           | diacylglycerol kinase, theta 110kDa                                    | Downregulated |
| A_23_P414 | 0.000883 | 0.000059  | -2.02 | TRPC3          | transient receptor potential cation channel, subfamily C, member 3     | Downregulated |
| A_24_P376 | 0.000888 | 0.0000599 | -2.02 | MBD1           | methyl-CpG binding domain protein 1                                    | Downregulated |
| A_23_P207 | 0.000959 | 0.0000711 | -2.02 | PPY            | pancreatic polypeptide                                                 | Downregulated |
| A_23_P603 | 0.001115 | 0.000102  | -2.02 | SMARCA2        | SWI/SNF related, matrix associated, actin dependent regulator of chrom | Downregulated |
| A_23_P204 | 0.001299 | 0.000139  | -2.02 | PPP1CC         | protein phosphatase 1, catalytic subunit, gamma isozyme                | Downregulated |
| A_23_P164 | 0.001403 | 0.000159  | -2.02 | FKRP           | fukutin related protein                                                | Downregulated |
| A_23_P254 | 0.005232 | 0.0013    | -2.02 | TUBB6          | tubulin, beta 6 class V                                                | Downregulated |
| A_32_P761 | 0.000697 | 0.0000321 | -2.03 | RWDD4          | RWD domain containing 4                                                | Downregulated |
| A_23_P652 | 0.000707 | 0.0000345 | -2.03 | TMTC4          | transmembrane and tetratricopeptide repeat containing 4                | Downregulated |
| A_33_P331 | 0.000712 | 0.0000359 | -2.03 | INTS6          | integrator complex subunit 6                                           | Downregulated |
| A_21_P001 | 0.000718 | 0.0000368 | -2.03 | XLOC_I2_011987 |                                                                        | Downregulated |
| A_23_P145 | 0.000744 | 0.00004   | -2.03 | BAK1           | BCL2-antagonist/killer 1                                               | Downregulated |
| A_21_P000 | 0.000959 | 0.0000712 | -2.03 | Inc-HMBOX1-    | Inc-HMBOX1-1:1                                                         | Downregulated |
| A_24_P940 | 0.000964 | 0.0000729 | -2.03 | IPCEF1         | interaction protein for cytohesin exchange factors 1                   | Downregulated |
| A_32_P466 | 0.000995 | 0.000079  | -2.03 | VWA3B          | von Willebrand factor A domain containing 3B                           | Downregulated |
| A_23_P139 | 0.001321 | 0.000142  | -2.03 | ARFIP2         | ADP-ribosylation factor interacting protein 2                          | Downregulated |
| A_24_P397 | 0.001382 | 0.000154  | -2.03 | ZC2HC1A        | zinc finger, C2HC-type containing 1A                                   | Downregulated |

|           |          |           |       |                |                                                                             |               |
|-----------|----------|-----------|-------|----------------|-----------------------------------------------------------------------------|---------------|
| A_21_P001 | 0.001968 | 0.000292  | -2.03 | LINC01347      | long intergenic non-protein coding RNA 1347                                 | Downregulated |
| A_23_P147 | 0.002117 | 0.000332  | -2.03 | ZNF280D        | zinc finger protein 280D                                                    | Downregulated |
| A_22_P000 | 0.002311 | 0.000381  | -2.03 | lnc-OSBPL9-2   | lnc-OSBPL9-2:1                                                              | Downregulated |
| A_21_P001 | 0.00348  | 0.000712  | -2.03 | LINC00869      | long intergenic non-protein coding RNA 869                                  | Downregulated |
| A_33_P326 | 0.005233 | 0.0013    | -2.03 | ZDHHC2         | zinc finger, DHHC-type containing 2                                         | Downregulated |
| A_22_P000 | 0.006753 | 0.00187   | -2.03 | LOC153684      | uncharacterized LOC153684                                                   | Downregulated |
| A_33_P323 | 0.00819  | 0.00244   | -2.03 | MAP3K7CL       | MAP3K7 C-terminal like                                                      | Downregulated |
| A_23_P925 | 0.014847 | 0.00535   | -2.03 | SYK            | spleen tyrosine kinase                                                      | Downregulated |
| A_23_P463 | 0.029806 | 0.0128    | -2.03 | TNFAIP8L2      | tumor necrosis factor, alpha-induced protein 8-like 2                       | Downregulated |
| A_33_P338 | 0.000691 | 0.0000306 | -2.04 | SKAP2          | src kinase associated phosphoprotein 2                                      | Downregulated |
| A_33_P358 | 0.000699 | 0.0000323 | -2.04 | GNAI2          | guanine nucleotide binding protein (G protein), alpha inhibiting activity p | Downregulated |
| A_32_P101 | 0.000764 | 0.0000422 | -2.04 | USP39          | ubiquitin specific peptidase 39                                             | Downregulated |
| A_23_P638 | 0.000967 | 0.0000735 | -2.04 | GOT1           | glutamic-oxaloacetic transaminase 1, soluble                                | Downregulated |
| A_32_P881 | 0.001021 | 0.0000832 | -2.04 | YPEL1          | yippee-like 1 (Drosophila)                                                  | Downregulated |
| A_23_P436 | 0.00124  | 0.000127  | -2.04 | MLLT4          | myeloid/lymphoid or mixed-lineage leukemia (trithorax homolog, Drosophila)  | Downregulated |
| A_21_P001 | 0.001443 | 0.000168  | -2.04 | XLOC_12_009134 |                                                                             | Downregulated |
| A_22_P000 | 0.001847 | 0.000261  | -2.04 | lnc-ME3-1      | lnc-ME3-1:1                                                                 | Downregulated |
| A_33_P342 | 0.00235  | 0.00039   | -2.04 | GOLGA7         | golgin A7                                                                   | Downregulated |
| A_22_P000 | 0.003458 | 0.000705  | -2.04 | lnc-TFDP2-1    | lnc-TFDP2-1:1                                                               | Downregulated |
| A_24_P142 | 0.010357 | 0.00335   | -2.04 | PI4KA          | phosphatidylinositol 4-kinase, catalytic, alpha                             | Downregulated |
| A_22_P000 | 0.014118 | 0.00499   | -2.04 | ZBTB20         | zinc finger and BTB domain containing 20                                    | Downregulated |
| A_24_P153 | 0.017086 | 0.0064    | -2.04 | OSBPL8         | oxysterol binding protein-like 8                                            | Downregulated |
| A_33_P335 | 0.000696 | 0.0000317 | -2.05 | GPD2           | glycerol-3-phosphate dehydrogenase 2 (mitochondrial)                        | Downregulated |
| A_33_P325 | 0.000697 | 0.0000321 | -2.05 | RPS23          | ribosomal protein S23                                                       | Downregulated |
| A_33_P341 | 0.000781 | 0.0000446 | -2.05 | ADTRP          | androgen-dependent TFPI-regulating protein                                  | Downregulated |
| A_21_P000 | 0.000928 | 0.0000657 | -2.05 | SNORA11C       | small nucleolar RNA, H/ACA box 11C                                          | Downregulated |
| A_23_P205 | 0.000938 | 0.0000676 | -2.05 | BCL11B         | B-cell CLL/lymphoma 11B (zinc finger protein)                               | Downregulated |
| A_21_P000 | 0.001043 | 0.0000873 | -2.05 | USP3-AS1       | USP3 antisense RNA 1                                                        | Downregulated |
| A_32_P498 | 0.00139  | 0.000156  | -2.05 | RHOQ           | ras homolog family member Q                                                 | Downregulated |
| A_24_P898 | 0.001699 | 0.000226  | -2.05 | CYHR1          | cysteine/histidine-rich 1                                                   | Downregulated |
| A_23_P325 | 0.001699 | 0.000226  | -2.05 | SCAI           | suppressor of cancer cell invasion                                          | Downregulated |
| A_22_P000 | 0.00203  | 0.000309  | -2.05 | GAS5-AS1       | GAS5 antisense RNA 1                                                        | Downregulated |
| A_33_P388 | 0.002705 | 0.000484  | -2.05 | PPA2           | pyrophosphatase (inorganic) 2                                               | Downregulated |
| A_33_P321 | 0.006067 | 0.00161   | -2.05 | CHIC1          | cysteine-rich hydrophobic domain 1                                          | Downregulated |
| A_33_P321 | 0.006352 | 0.00172   | -2.05 | RCOR1          | REST corepressor 1                                                          | Downregulated |
| A_24_P276 | 0.000718 | 0.0000368 | -2.06 | RCOR3          | REST corepressor 3                                                          | Downregulated |
| A_23_P809 | 0.000752 | 0.0000408 | -2.06 | RNF5           | ring finger protein 5, E3 ubiquitin protein ligase                          | Downregulated |

|           |          |           |       |               |                                                                        |               |
|-----------|----------|-----------|-------|---------------|------------------------------------------------------------------------|---------------|
| A_22_P000 | 0.000764 | 0.0000422 | -2.06 | SMARCC2       | SWI/SNF related, matrix associated, actin dependent regulator of chrom | Downregulated |
| A_23_P593 | 0.000814 | 0.0000498 | -2.06 | HECA          | headcase homolog (Drosophila)                                          | Downregulated |
| A_22_P000 | 0.002246 | 0.000367  | -2.06 | RNF139-AS1    | RNF139 antisense RNA 1 (head to head)                                  | Downregulated |
| A_22_P000 | 0.002853 | 0.000525  | -2.06 | lnc-C6orf225- | lnc-C6orf225-1:1                                                       | Downregulated |
| A_24_P288 | 0.003525 | 0.000724  | -2.06 | SRRD          | SRR1 domain containing                                                 | Downregulated |
| A_33_P681 | 0.00689  | 0.00193   | -2.06 | lnc-GGCT-1    | lnc-GGCT-1:6                                                           | Downregulated |
| A_23_P601 | 0.008676 | 0.00264   | -2.06 | ABL1          | ABL proto-oncogene 1, non-receptor tyrosine kinase                     | Downregulated |
| A_33_P332 | 0.011297 | 0.00374   | -2.06 | BDNF-AS       | BDNF antisense RNA                                                     | Downregulated |
| A_33_P336 | 0.000743 | 0.0000397 | -2.07 | PTPRC         | protein tyrosine phosphatase, receptor type, C                         | Downregulated |
| A_23_P426 | 0.000765 | 0.0000425 | -2.07 | GGCT          | gamma-glutamylcyclotransferase                                         | Downregulated |
| A_33_P332 | 0.000869 | 0.0000576 | -2.07 | CDK19         | cyclin-dependent kinase 19                                             | Downregulated |
| A_23_P345 | 0.000977 | 0.0000752 | -2.07 | RPAP1         | RNA polymerase II associated protein 1                                 | Downregulated |
| A_33_P349 | 0.000987 | 0.0000765 | -2.07 | lnc-AC016745- | lnc-AC016745.1-2:1                                                     | Downregulated |
| A_23_P562 | 0.00104  | 0.0000867 | -2.07 | POLR2I        | polymerase (RNA) II (DNA directed) polypeptide I, 14.5kDa              | Downregulated |
| A_24_P493 | 0.001042 | 0.000087  | -2.07 | AAMDC         | adipogenesis associated, Mth938 domain containing                      | Downregulated |
| A_33_P336 | 0.001611 | 0.000204  | -2.07 | KLF6          | Kruppel-like factor 6                                                  | Downregulated |
| A_32_P173 | 0.001881 | 0.000269  | -2.07 | TMEM41B       | transmembrane protein 41B                                              | Downregulated |
| A_33_P321 | 0.002319 | 0.000383  | -2.07 | FAM230B       | family with sequence similarity 230, member B (non-protein coding)     | Downregulated |
| A_23_P369 | 0.003304 | 0.000661  | -2.07 | MSI2          | musashi RNA-binding protein 2                                          | Downregulated |
| A_22_P000 | 0.003649 | 0.000764  | -2.07 | lnc-COL9A2-1  | lnc-COL9A2-1:1                                                         | Downregulated |
| A_33_P339 | 0.004219 | 0.000946  | -2.07 | IPCEF1        | interaction protein for cytohesin exchange factors 1                   | Downregulated |
| A_23_P407 | 0.004288 | 0.000969  | -2.07 | DNM2          | dynamamin 2                                                            | Downregulated |
| A_24_P351 | 0.004894 | 0.00118   | -2.07 | GATAD1        | GATA zinc finger domain containing 1                                   | Downregulated |
| A_33_P326 | 0.000709 | 0.0000348 | -2.08 | NCK2          | NCK adaptor protein 2                                                  | Downregulated |
| A_23_P154 | 0.000775 | 0.0000437 | -2.08 | NAGK          | N-acetylglucosamine kinase                                             | Downregulated |
| A_23_P122 | 0.000995 | 0.0000787 | -2.08 | DAXX          | death-domain associated protein                                        | Downregulated |
| A_21_P000 | 0.001095 | 0.0000979 | -2.08 | lnc-ZNF169-1  | lnc-ZNF169-1:1                                                         | Downregulated |
| A_33_P336 | 0.001097 | 0.0000983 | -2.08 | KCTD5         | potassium channel tetramerization domain containing 5                  | Downregulated |
| A_33_P325 | 0.002816 | 0.000515  | -2.08 | SH2D3A        | SH2 domain containing 3A                                               | Downregulated |
| A_33_P339 | 0.003175 | 0.000622  | -2.08 | FAM178A       | family with sequence similarity 178, member A                          | Downregulated |
| A_24_P314 | 0.008684 | 0.00265   | -2.08 | GOLGA2P2Y     | golgin A2 pseudogene 2, Y-linked                                       | Downregulated |
| A_23_P743 | 0.014083 | 0.00497   | -2.08 | NUF2          | NUF2, NDC80 kinetochore complex component                              | Downregulated |
| A_33_P337 | 0.019239 | 0.00741   | -2.08 | FGD5P1        | FYVE, RhoGEF and PH domain containing 5 pseudogene 1                   | Downregulated |
| A_21_P000 | 0.000669 | 0.0000285 | -2.09 | RNU11         | RNA, U11 small nuclear                                                 | Downregulated |
| A_33_P336 | 0.000706 | 0.0000335 | -2.09 | BSDC1         | BSD domain containing 1                                                | Downregulated |
| A_33_P337 | 0.000726 | 0.0000377 | -2.09 | TXLNA         | taxilin alpha                                                          | Downregulated |
| A_23_P480 | 0.00074  | 0.0000394 | -2.09 | CD27          | CD27 molecule                                                          | Downregulated |



|           |          |           |       |                |                                                                               |               |
|-----------|----------|-----------|-------|----------------|-------------------------------------------------------------------------------|---------------|
| A_21_P001 | 0.000844 | 0.0000536 | -2.09 | LOC1019284     | uncharacterized LOC101928464                                                  | Downregulated |
| A_22_P000 | 0.000998 | 0.0000798 | -2.09 | lnc-PRR15L-2   | lnc-PRR15L-2:2                                                                | Downregulated |
| A_24_P274 | 0.00112  | 0.000103  | -2.09 | STAT1          | signal transducer and activator of transcription 1, 91kDa                     | Downregulated |
| A_21_P000 | 0.001678 | 0.000219  | -2.09 | lnc-CCDC111    | lnc-CCDC111-1:1                                                               | Downregulated |
| A_21_P000 | 0.002947 | 0.000551  | -2.09 | lnc-AMZ2-1     | lnc-AMZ2-1:1                                                                  | Downregulated |
| A_24_P912 | 0.003176 | 0.000623  | -2.09 | KIAA0754       | KIAA0754                                                                      | Downregulated |
| A_33_P335 | 0.004396 | 0.00101   | -2.09 | VAC14-AS1      | VAC14 antisense RNA 1                                                         | Downregulated |
| A_23_P897 | 0.005822 | 0.00152   | -2.09 | CTDP1          | CTD (carboxy-terminal domain, RNA polymerase II, polypeptide A) phosphatase 1 | Downregulated |
| A_23_P544 | 0.013794 | 0.00484   | -2.09 | ACSBG1         | acyl-CoA synthetase bubblegum family member 1                                 | Downregulated |
| A_21_P000 | 0.016316 | 0.00604   | -2.09 | lnc-MIB2-1     | lnc-MIB2-1:5                                                                  | Downregulated |
| A_24_P112 | 0.021843 | 0.00867   | -2.09 | ENTPD7         | ectonucleoside triphosphate diphosphohydrolase 7                              | Downregulated |
| A_33_P728 | 0.000707 | 0.0000343 | -2.1  | LOC401320      | uncharacterized LOC401320                                                     | Downregulated |
| A_23_P106 | 0.000715 | 0.0000363 | -2.1  | HSPBP1         | HSPA (heat shock 70kDa) binding protein, cytoplasmic cochaperone 1            | Downregulated |
| A_33_P340 | 0.000721 | 0.0000373 | -2.1  | HAS3           | hyaluronan synthase 3                                                         | Downregulated |
| A_23_P104 | 0.000739 | 0.0000392 | -2.1  | CPT1A          | carnitine palmitoyltransferase 1A (liver)                                     | Downregulated |
| A_32_P121 | 0.000864 | 0.0000568 | -2.1  | DOK3           | docking protein 3                                                             | Downregulated |
| A_21_P000 | 0.000866 | 0.0000572 | -2.1  | SNORA4         | small nucleolar RNA, H/ACA box 4                                              | Downregulated |
| A_23_P357 | 0.001043 | 0.0000873 | -2.1  | ANXA6          | annexin A6                                                                    | Downregulated |
| A_33_P322 | 0.00105  | 0.0000886 | -2.1  | CD151          | CD151 molecule (Raph blood group)                                             | Downregulated |
| A_23_P776 | 0.00112  | 0.000103  | -2.1  | MAP1LC3B       | microtubule-associated protein 1 light chain 3 beta                           | Downregulated |
| A_23_P322 | 0.001138 | 0.000107  | -2.1  | KLF4           | Kruppel-like factor 4 (gut)                                                   | Downregulated |
| A_23_P384 | 0.001424 | 0.000163  | -2.1  | CCDC14         | coiled-coil domain containing 14                                              | Downregulated |
| A_33_P334 | 0.002055 | 0.000316  | -2.1  | JMJD7          | jumonji domain containing 7                                                   | Downregulated |
| A_23_P200 | 0.002237 | 0.000363  | -2.1  | NADK           | NAD kinase                                                                    | Downregulated |
| A_23_P394 | 0.002243 | 0.000366  | -2.1  | ALKBH6         | alkB, alkylation repair homolog 6 (E. coli)                                   | Downregulated |
| A_21_P001 | 0.003023 | 0.000575  | -2.1  | XLOC_I2_013857 |                                                                               | Downregulated |
| A_23_P518 | 0.003278 | 0.000652  | -2.1  | PUSL1          | pseudouridylate synthase-like 1                                               | Downregulated |
| A_33_P328 | 0.006575 | 0.00181   | -2.1  | CTNS           | cystinosin, lysosomal cystine transporter                                     | Downregulated |
| A_24_P353 | 0.008507 | 0.00257   | -2.1  | LIMK2          | LIM domain kinase 2                                                           | Downregulated |
| A_24_P694 | 0.000709 | 0.0000351 | -2.11 | SLC25A32       | solute carrier family 25 (mitochondrial folate carrier), member 32            | Downregulated |
| A_21_P000 | 0.00075  | 0.0000404 | -2.11 | LOC1019273     | uncharacterized LOC101927334                                                  | Downregulated |
| A_24_P410 | 0.000813 | 0.0000496 | -2.11 | VGLL4          | vestigial-like family member 4                                                | Downregulated |
| A_22_P000 | 0.00094  | 0.0000682 | -2.11 | lnc-HIST1H3F   | lnc-HIST1H3F-1:1                                                              | Downregulated |
| A_33_P336 | 0.001131 | 0.000105  | -2.11 | BLVRB          | biliverdin reductase B                                                        | Downregulated |
| A_23_P159 | 0.001196 | 0.000118  | -2.11 | SNRNP35        | small nuclear ribonucleoprotein 35kDa (U11/U12)                               | Downregulated |
| A_23_P138 | 0.001215 | 0.000122  | -2.11 | C10orf95       | chromosome 10 open reading frame 95                                           | Downregulated |
| A_23_P120 | 0.001264 | 0.000132  | -2.11 | MTX2           | metaxin 2                                                                     | Downregulated |

|           |          |           |       |                |                                                                 |               |
|-----------|----------|-----------|-------|----------------|-----------------------------------------------------------------|---------------|
| A_21_P000 | 0.002744 | 0.000495  | -2.11 | SNORD34        | small nucleolar RNA, C/D box 34                                 | Downregulated |
| A_33_P350 | 0.00433  | 0.000985  | -2.11 | CASP10         | caspase 10, apoptosis-related cysteine peptidase                | Downregulated |
| A_21_P000 | 0.004816 | 0.00115   | -2.11 | lnc-AC07409    | lnc-AC074091.13.1-1:1                                           | Downregulated |
| A_23_P189 | 0.005872 | 0.00153   | -2.11 | MIER3          | mesoderm induction early response 1, family member 3            | Downregulated |
| A_21_P001 | 0.008161 | 0.00243   | -2.11 | LOC1005074     | uncharacterized LOC100507460                                    | Downregulated |
| A_33_P330 | 0.011279 | 0.00374   | -2.11 | RBM20          | RNA binding motif protein 20                                    | Downregulated |
| A_24_P153 | 0.011931 | 0.00402   | -2.11 | TRIM37         | tripartite motif containing 37                                  | Downregulated |
| A_24_P920 | 0.023878 | 0.0097    | -2.11 | COMMD6         | COMM domain containing 6                                        | Downregulated |
| A_23_P250 | 0.000848 | 0.0000543 | -2.12 | ST3GAL6        | ST3 beta-galactoside alpha-2,3-sialyltransferase 6              | Downregulated |
| A_24_P295 | 0.000855 | 0.0000555 | -2.12 | RASSF4         | Ras association (RalGDS/AF-6) domain family member 4            | Downregulated |
| A_21_P000 | 0.000857 | 0.0000558 | -2.12 | HMGA1P7        | high mobility group AT-hook 1 pseudogene 7                      | Downregulated |
| A_24_P381 | 0.000959 | 0.0000714 | -2.12 | ITM2B          | integral membrane protein 2B                                    | Downregulated |
| A_21_P000 | 0.001163 | 0.000112  | -2.12 | LINC01138      | long intergenic non-protein coding RNA 1138                     | Downregulated |
| A_32_P165 | 0.00203  | 0.000309  | -2.12 | WDR92          | WD repeat domain 92                                             | Downregulated |
| A_21_P000 | 0.004687 | 0.00111   | -2.12 | lnc-H3F3C-1    | lnc-H3F3C-1:1                                                   | Downregulated |
| A_21_P001 | 0.01356  | 0.00474   | -2.12 | XLOC_I2_003647 |                                                                 | Downregulated |
| A_21_P000 | 0.015921 | 0.00584   | -2.12 | lnc-AC01231    | lnc-AC012313.1-1:4                                              | Downregulated |
| A_21_P000 | 0.000647 | 0.0000267 | -2.13 | BTN2A1         | butyrophilin, subfamily 2, member A1                            | Downregulated |
| A_23_P612 | 0.000693 | 0.0000309 | -2.13 | FAM207A        | family with sequence similarity 207, member A                   | Downregulated |
| A_23_P201 | 0.000792 | 0.0000465 | -2.13 | LAMC1          | laminin, gamma 1 (formerly LAMB2)                               | Downregulated |
| A_23_P282 | 0.000808 | 0.0000489 | -2.13 | ACTR1B         | ARP1 actin-related protein 1 homolog B, centractin beta (yeast) | Downregulated |
| A_22_P000 | 0.00112  | 0.000103  | -2.13 | lnc-IL15RA-1   | lnc-IL15RA-1:1                                                  | Downregulated |
| A_21_P000 | 0.002101 | 0.000327  | -2.13 | lnc-GOLGA8J    | lnc-GOLGA8J-1:1                                                 | Downregulated |
| A_32_P416 | 0.003175 | 0.000622  | -2.13 | F5             | coagulation factor V (proaccelerin, labile factor)              | Downregulated |
| A_33_P337 | 0.005033 | 0.00122   | -2.13 | PDE5A          | phosphodiesterase 5A, cGMP-specific                             | Downregulated |
| A_23_P112 | 0.005093 | 0.00124   | -2.13 | DNAJB5         | DnaJ (Hsp40) homolog, subfamily B, member 5                     | Downregulated |
| A_33_P323 | 0.017742 | 0.0067    | -2.13 | AGFG1          | ArfGAP with FG repeats 1                                        | Downregulated |
| A_33_P322 | 0.000693 | 0.0000309 | -2.14 | DAPK3          | death-associated protein kinase 3                               | Downregulated |
| A_32_P209 | 0.000699 | 0.0000323 | -2.14 | CIITA          | class II, major histocompatibility complex, transactivator      | Downregulated |
| A_23_P428 | 0.000739 | 0.0000392 | -2.14 | CHCHD4         | coiled-coil-helix-coiled-coil-helix domain containing 4         | Downregulated |
| A_24_P273 | 0.000754 | 0.000041  | -2.14 | EML4           | echinoderm microtubule associated protein like 4                | Downregulated |
| A_23_P156 | 0.000888 | 0.0000599 | -2.14 | CNOT4          | CCR4-NOT transcription complex, subunit 4                       | Downregulated |
| A_24_P274 | 0.000963 | 0.0000726 | -2.14 | ARRDC3         | arrestin domain containing 3                                    | Downregulated |
| A_23_P237 | 0.001085 | 0.0000959 | -2.14 | VPS45          | vacuolar protein sorting 45 homolog (S. cerevisiae)             | Downregulated |
| A_33_P338 | 0.001092 | 0.0000975 | -2.14 | HSPA6          | heat shock 70kDa protein 6 (HSP70B')                            | Downregulated |
| A_21_P001 | 0.001265 | 0.000132  | -2.14 | XLOC_I2_005490 |                                                                 | Downregulated |
| A_21_P001 | 0.001386 | 0.000155  | -2.14 | C9orf3         | chromosome 9 open reading frame 3                               | Downregulated |

|           |          |           |       |             |                                                                        |               |
|-----------|----------|-----------|-------|-------------|------------------------------------------------------------------------|---------------|
| A_24_P971 | 0.002219 | 0.000358  | -2.14 | CTDSP1      | CTD (carboxy-terminal domain, RNA polymerase II, polypeptide A) small  | Downregulated |
| A_23_P218 | 0.00239  | 0.000401  | -2.14 | CAPN3       | calpain 3, (p94)                                                       | Downregulated |
| A_23_P153 | 0.002773 | 0.000503  | -2.14 | CERS4       | ceramide synthase 4                                                    | Downregulated |
| A_24_P137 | 0.00299  | 0.000565  | -2.14 | USP53       | ubiquitin specific peptidase 53                                        | Downregulated |
| A_23_P142 | 0.004315 | 0.000979  | -2.14 | C2orf69     | chromosome 2 open reading frame 69                                     | Downregulated |
| A_24_P296 | 0.00615  | 0.00164   | -2.14 | COG3        | component of oligomeric golgi complex 3                                | Downregulated |
| A_33_P336 | 0.008528 | 0.00258   | -2.14 | MAP3K1      | mitogen-activated protein kinase kinase 1, E3 ubiquitin protein ligase | Downregulated |
| A_33_P336 | 0.019992 | 0.00777   | -2.14 | NEDD9       | neural precursor cell expressed, developmentally down-regulated 9      | Downregulated |
| A_24_P346 | 0.000848 | 0.0000544 | -2.15 | TMEM248     | transmembrane protein 248                                              | Downregulated |
| A_23_P213 | 0.001056 | 0.00009   | -2.15 | GFM2        | G elongation factor, mitochondrial 2                                   | Downregulated |
| A_23_P217 | 0.001141 | 0.000108  | -2.15 | KLF8        | Kruppel-like factor 8                                                  | Downregulated |
| A_23_P215 | 0.003406 | 0.00069   | -2.15 | KIAA1429    | KIAA1429                                                               | Downregulated |
| A_22_P000 | 0.006185 | 0.00165   | -2.15 | lnc-GTDC1-5 | lnc-GTDC1-5:2                                                          | Downregulated |
| A_32_P191 | 0.006847 | 0.00191   | -2.15 | LINC00265   | long intergenic non-protein coding RNA 265                             | Downregulated |
| A_23_P301 | 0.014292 | 0.00508   | -2.15 | PAIP2B      | poly(A) binding protein interacting protein 2B                         | Downregulated |
| A_21_P001 | 0.000642 | 0.0000262 | -2.16 | PPP2R5C     | protein phosphatase 2, regulatory subunit B', gamma                    | Downregulated |
| A_23_P367 | 0.00065  | 0.000027  | -2.16 | SNX29       | sorting nexin 29                                                       | Downregulated |
| A_23_P127 | 0.000738 | 0.0000389 | -2.16 | POLD4       | polymerase (DNA-directed), delta 4, accessory subunit                  | Downregulated |
| A_23_P232 | 0.000971 | 0.0000741 | -2.16 | RCSD1       | RCSD domain containing 1                                               | Downregulated |
| A_22_P000 | 0.001129 | 0.000105  | -2.16 | KDM4A-AS1   | KDM4A antisense RNA 1                                                  | Downregulated |
| A_33_P334 | 0.001337 | 0.000145  | -2.16 | LOC1001322  | uncharacterized LOC100132249                                           | Downregulated |
| A_24_P562 | 0.001494 | 0.000179  | -2.16 | DYRK2       | dual-specificity tyrosine-(Y)-phosphorylation regulated kinase 2       | Downregulated |
| A_33_P321 | 0.00163  | 0.000209  | -2.16 | RBM33       | RNA binding motif protein 33                                           | Downregulated |
| A_23_P654 | 0.001702 | 0.000227  | -2.16 | TEP1        | telomerase-associated protein 1                                        | Downregulated |
| A_22_P000 | 0.001889 | 0.000271  | -2.16 | LOC1005072  | uncharacterized LOC100507250                                           | Downregulated |
| A_23_P207 | 0.00308  | 0.000591  | -2.16 | ATP2A3      | ATPase, Ca <sup>++</sup> transporting, ubiquitous                      | Downregulated |
| A_33_P323 | 0.003875 | 0.000835  | -2.16 | MAP2K7      | mitogen-activated protein kinase kinase 7                              | Downregulated |
| A_33_P332 | 0.003985 | 0.000868  | -2.16 | TNFRSF1B    | tumor necrosis factor receptor superfamily, member 1B                  | Downregulated |
| A_24_P193 | 0.005861 | 0.00153   | -2.16 | KLRK1       | killer cell lectin-like receptor subfamily K, member 1                 | Downregulated |
| A_22_P000 | 0.006363 | 0.00172   | -2.16 | JARID2-AS1  | JARID2 antisense RNA 1                                                 | Downregulated |
| A_32_P194 | 0.008234 | 0.00246   | -2.16 | TECPR1      | tectonin beta-propeller repeat containing 1                            | Downregulated |
| A_33_P331 | 0.000805 | 0.0000483 | -2.17 | WDR91       | WD repeat domain 91                                                    | Downregulated |
| A_23_P200 | 0.00198  | 0.000295  | -2.17 | SHC1        | SHC (Src homology 2 domain containing) transforming protein 1          | Downregulated |
| A_33_P342 | 0.002243 | 0.000366  | -2.17 | GRHL1       | grainyhead-like 1 (Drosophila)                                         | Downregulated |
| A_33_P324 | 0.002279 | 0.000374  | -2.17 | CALHM3      | calcium homeostasis modulator 3                                        | Downregulated |
| A_22_P000 | 0.002528 | 0.000437  | -2.17 | lnc-PRMT8-2 | lnc-PRMT8-2:1                                                          | Downregulated |
| A_32_P117 | 0.003389 | 0.000685  | -2.17 | TRIQQ       | triple QxxK/R motif containing                                         | Downregulated |

|           |          |           |       |              |                                                                         |               |
|-----------|----------|-----------|-------|--------------|-------------------------------------------------------------------------|---------------|
| A_33_P330 | 0.004269 | 0.000963  | -2.17 | STRA6        | stimulated by retinoic acid 6                                           | Downregulated |
| A_33_P335 | 0.006863 | 0.00191   | -2.17 | C1orf194     | chromosome 1 open reading frame 194                                     | Downregulated |
| A_23_P395 | 0.007703 | 0.00225   | -2.17 | C2orf76      | chromosome 2 open reading frame 76                                      | Downregulated |
| A_33_P323 | 0.009012 | 0.00278   | -2.17 | RPP30        | ribonuclease P/MRP 30kDa subunit                                        | Downregulated |
| A_23_P212 | 0.011519 | 0.00384   | -2.17 | TRIM37       | tripartite motif containing 37                                          | Downregulated |
| A_23_P102 | 0.028637 | 0.0122    | -2.17 | CEP250       | centrosomal protein 250kDa                                              | Downregulated |
| A_23_P770 | 0.000626 | 0.0000247 | -2.18 | SNRPN        | small nuclear ribonucleoprotein polypeptide N                           | Downregulated |
| A_33_P322 | 0.00063  | 0.000025  | -2.18 | NDOR1        | NADPH dependent diflavin oxidoreductase 1                               | Downregulated |
| A_23_P385 | 0.000701 | 0.0000327 | -2.18 | PAOX         | polyamine oxidase (exo-N4-amino)                                        | Downregulated |
| A_23_P134 | 0.000712 | 0.0000358 | -2.18 | RBM12B-AS1   | RBM12B antisense RNA 1                                                  | Downregulated |
| A_33_P370 | 0.000746 | 0.0000402 | -2.18 | DPY19L3      | dpy-19-like 3 (C. elegans)                                              | Downregulated |
| A_23_P627 | 0.000824 | 0.0000511 | -2.18 | CCDC28B      | coiled-coil domain containing 28B                                       | Downregulated |
| A_22_P000 | 0.000858 | 0.0000561 | -2.18 | lnc-RP11-148 | lnc-RP11-148O21.2.1-2:1                                                 | Downregulated |
| A_23_P217 | 0.000938 | 0.0000677 | -2.18 | BRCC3        | BRCA1/BRCA2-containing complex, subunit 3                               | Downregulated |
| A_33_P335 | 0.000971 | 0.0000743 | -2.18 | SLFN14       | schlafen family member 14                                               | Downregulated |
| A_22_P000 | 0.001341 | 0.000146  | -2.18 | lnc-SHANK2-4 | lnc-SHANK2-5:2                                                          | Downregulated |
| A_24_P832 | 0.001381 | 0.000154  | -2.18 | FAM120AOS    | family with sequence similarity 120A opposite strand                    | Downregulated |
| A_24_P184 | 0.001808 | 0.000251  | -2.18 | COCH         | cochlin                                                                 | Downregulated |
| A_23_P615 | 0.014995 | 0.00542   | -2.18 | NSUN6        | NOP2/Sun domain family, member 6                                        | Downregulated |
| A_33_P333 | 0.000722 | 0.0000374 | -2.19 | IFNAR2       | interferon (alpha, beta and omega) receptor 2                           | Downregulated |
| A_33_P323 | 0.000755 | 0.0000411 | -2.19 | UTRN         | utrophin                                                                | Downregulated |
| A_23_P214 | 0.000937 | 0.0000669 | -2.19 | REV3L        | REV3-like, polymerase (DNA directed), zeta, catalytic subunit           | Downregulated |
| A_24_P299 | 0.000942 | 0.0000685 | -2.19 | ZBTB18       | zinc finger and BTB domain containing 18                                | Downregulated |
| A_33_P380 | 0.001126 | 0.000105  | -2.19 | TRAF2        | TNF receptor-associated factor 2                                        | Downregulated |
| A_21_P000 | 0.001369 | 0.000152  | -2.19 | SNORA6       | small nucleolar RNA, H/ACA box 6                                        | Downregulated |
| A_24_P400 | 0.003125 | 0.000606  | -2.19 | SMCHD1       | structural maintenance of chromosomes flexible hinge domain containin   | Downregulated |
| A_24_P622 | 0.003543 | 0.000731  | -2.19 | CERK         | ceramide kinase                                                         | Downregulated |
| A_23_P251 | 0.005608 | 0.00144   | -2.19 | SNTG2        | syntrophin, gamma 2                                                     | Downregulated |
| A_22_P000 | 0.009491 | 0.00297   | -2.19 | lnc-RMND5A-1 | lnc-RMND5A-1:2                                                          | Downregulated |
| A_23_P413 | 0.020076 | 0.00781   | -2.19 | POC5         | POC5 centriolar protein                                                 | Downregulated |
| A_23_P117 | 0.000626 | 0.0000247 | -2.2  | CLN6         | ceroid-lipofuscinosis, neuronal 6, late infantile, variant              | Downregulated |
| A_21_P001 | 0.000705 | 0.0000332 | -2.2  | C6orf62      | chromosome 6 open reading frame 62                                      | Downregulated |
| A_23_P786 | 0.000739 | 0.0000391 | -2.2  | DENND1C      | DENN/MADD domain containing 1C                                          | Downregulated |
| A_33_P324 | 0.000858 | 0.000056  | -2.2  | RALGAPB      | Ral GTPase activating protein, beta subunit (non-catalytic)             | Downregulated |
| A_24_P678 | 0.001654 | 0.000214  | -2.2  | STMN3        | stathmin-like 3                                                         | Downregulated |
| A_33_P336 | 0.002352 | 0.000391  | -2.2  | SLC35B2      | solute carrier family 35 (adenosine 3'-phospho 5'-phosphosulfate transp | Downregulated |
| A_24_P655 | 0.002544 | 0.000442  | -2.2  | OIP5-AS1     | OIP5 antisense RNA 1                                                    | Downregulated |

|           |          |           |       |                |                                                                      |               |
|-----------|----------|-----------|-------|----------------|----------------------------------------------------------------------|---------------|
| A_23_P119 | 0.00284  | 0.000522  | -2.2  | TMEM185B       | transmembrane protein 185B                                           | Downregulated |
| A_21_P000 | 0.006029 | 0.00159   | -2.2  | LINC01364      | long intergenic non-protein coding RNA 1364                          | Downregulated |
| A_21_P000 | 0.006384 | 0.00173   | -2.2  | LOC1005076     | uncharacterized LOC100507651                                         | Downregulated |
| A_33_P322 | 0.007361 | 0.00211   | -2.2  | ITGA4          | integrin, alpha 4 (antigen CD49D, alpha 4 subunit of VLA-4 receptor) | Downregulated |
| A_22_P000 | 0.014764 | 0.00531   | -2.2  | lnc-C5orf35-1  | lnc-C5orf35-1:1                                                      | Downregulated |
| A_23_P502 | 0.018525 | 0.00707   | -2.2  | RASAL2         | RAS protein activator like 2                                         | Downregulated |
| A_24_P206 | 0.00077  | 0.0000431 | -2.21 | SNX15          | sorting nexin 15                                                     | Downregulated |
| A_21_P000 | 0.003085 | 0.000593  | -2.21 | lnc-AC024563   | lnc-AC024563.1-2:1                                                   | Downregulated |
| A_22_P000 | 0.003687 | 0.000776  | -2.21 | lnc-CCDC83-1   | lnc-CCDC83-1:1                                                       | Downregulated |
| A_24_P251 | 0.004003 | 0.000874  | -2.21 | ABCF3          | ATP-binding cassette, sub-family F (GCN20), member 3                 | Downregulated |
| A_21_P001 | 0.01064  | 0.00346   | -2.21 | XLOC_I2_013873 |                                                                      | Downregulated |
| A_33_P338 | 0.000614 | 0.0000235 | -2.22 | COL5A1         | collagen, type V, alpha 1                                            | Downregulated |
| A_33_P325 | 0.000663 | 0.000028  | -2.22 | RNF7           | ring finger protein 7                                                | Downregulated |
| A_23_P218 | 0.000682 | 0.0000298 | -2.22 | ZGPAT          | zinc finger, CCCH-type with G patch domain                           | Downregulated |
| A_23_P661 | 0.000701 | 0.0000328 | -2.22 | ITFG3          | integrin alpha FG-GAP repeat containing 3                            | Downregulated |
| A_23_P759 | 0.000829 | 0.0000518 | -2.22 | CLPB           | ClpB caseinolytic peptidase B homolog (E. coli)                      | Downregulated |
| A_33_P336 | 0.000856 | 0.0000556 | -2.22 | BOLA3          | boIA family member 3                                                 | Downregulated |
| A_21_P001 | 0.001034 | 0.0000856 | -2.22 | XLOC_I2_004595 |                                                                      | Downregulated |
| A_23_P297 | 0.00112  | 0.000103  | -2.22 | WWTR1          | WW domain containing transcription regulator 1                       | Downregulated |
| A_33_P341 | 0.002006 | 0.000302  | -2.22 | AREG           | amphiregulin                                                         | Downregulated |
| A_33_P335 | 0.002076 | 0.000321  | -2.22 | UBLCP1         | ubiquitin-like domain containing CTD phosphatase 1                   | Downregulated |
| A_22_P000 | 0.003516 | 0.000722  | -2.22 | UBXN8          | UBX domain protein 8                                                 | Downregulated |
| A_32_P676 | 0.000709 | 0.0000351 | -2.23 | FAM120C        | family with sequence similarity 120C                                 | Downregulated |
| A_33_P385 | 0.00277  | 0.000502  | -2.23 | CIRBP-AS1      | CIRBP antisense RNA 1                                                | Downregulated |
| A_33_P386 | 0.0044   | 0.00101   | -2.23 | lnc-FOXD4L6    | lnc-FOXD4L6-3:1                                                      | Downregulated |
| A_33_P333 | 0.007276 | 0.00208   | -2.23 | MUC1           | mucin 1, cell surface associated                                     | Downregulated |
| A_22_P000 | 0.00895  | 0.00275   | -2.23 | lnc-CAPN13-1   | lnc-CAPN13-1:1                                                       | Downregulated |
| A_23_P781 | 0.010163 | 0.00327   | -2.23 | MYO18A         | myosin XVIIIa                                                        | Downregulated |
| A_23_P316 | 0.000596 | 0.0000211 | -2.24 | ACOX3          | acyl-CoA oxidase 3, pristanoyl                                       | Downregulated |
| A_24_P115 | 0.000603 | 0.0000221 | -2.24 | RIC8A          | RIC8 guanine nucleotide exchange factor A                            | Downregulated |
| A_24_P230 | 0.000646 | 0.0000266 | -2.24 | ZNFX1          | zinc finger, NFX1-type containing 1                                  | Downregulated |
| A_24_P208 | 0.000783 | 0.0000449 | -2.24 | EDEM3          | ER degradation enhancer, mannosidase alpha-like 3                    | Downregulated |
| A_23_P717 | 0.001147 | 0.000109  | -2.24 | TMEM206        | transmembrane protein 206                                            | Downregulated |
| A_33_P336 | 0.001171 | 0.000113  | -2.24 | FCRL3          | Fc receptor-like 3                                                   | Downregulated |
| A_23_P115 | 0.001226 | 0.000124  | -2.24 | ECD            | ecdysoneless homolog (Drosophila)                                    | Downregulated |
| A_23_P686 | 0.001763 | 0.00024   | -2.24 | TMEM115        | transmembrane protein 115                                            | Downregulated |
| A_23_P130 | 0.001948 | 0.000285  | -2.24 | ZDHHC13        | zinc finger, DHHC-type containing 13                                 | Downregulated |

|           |          |           |       |                |                                                                        |               |
|-----------|----------|-----------|-------|----------------|------------------------------------------------------------------------|---------------|
| A_23_P557 | 0.003453 | 0.000703  | -2.24 | CIC            | capicua transcriptional repressor                                      | Downregulated |
| A_21_P000 | 0.008039 | 0.00238   | -2.24 | lnc-ANO10-1    | lnc-ANO10-1:1                                                          | Downregulated |
| A_23_P783 | 0.000702 | 0.000033  | -2.25 | C18orf8        | chromosome 18 open reading frame 8                                     | Downregulated |
| A_23_P309 | 0.000773 | 0.0000434 | -2.25 | HENMT1         | HEN1 methyltransferase homolog 1 (Arabidopsis)                         | Downregulated |
| A_23_P368 | 0.000783 | 0.0000448 | -2.25 | GIMAP2         | GTPase, IMAP family member 2                                           | Downregulated |
| A_33_P333 | 0.000964 | 0.0000728 | -2.25 | FAM86FP        | family with sequence similarity 86, member A pseudogene                | Downregulated |
| A_33_P330 | 0.001032 | 0.0000854 | -2.25 | PLEKHG2        | pleckstrin homology domain containing, family G (with RhoGef domain) r | Downregulated |
| A_23_P138 | 0.001137 | 0.000107  | -2.25 | ARL8A          | ADP-ribosylation factor-like 8A                                        | Downregulated |
| A_32_P220 | 0.004151 | 0.000921  | -2.25 | ZNF658         | zinc finger protein 658                                                | Downregulated |
| A_23_P952 | 0.005354 | 0.00134   | -2.25 | CASC1          | cancer susceptibility candidate 1                                      | Downregulated |
| A_23_P648 | 0.005582 | 0.00143   | -2.25 | OAS1           | 2'-5'-oligoadenylate synthetase 1, 40/46kDa                            | Downregulated |
| A_21_P000 | 0.007547 | 0.00219   | -2.25 | LOC1019271     | uncharacterized LOC101927156                                           | Downregulated |
| A_23_P366 | 0.008108 | 0.00241   | -2.25 | LATS1          | large tumor suppressor kinase 1                                        | Downregulated |
| A_23_P168 | 0.011241 | 0.00372   | -2.25 | WASF1          | WAS protein family, member 1                                           | Downregulated |
| A_33_P334 | 0.000611 | 0.0000232 | -2.26 | UQCRBP1        | ubiquinol-cytochrome c reductase binding protein pseudogene 1          | Downregulated |
| A_23_P137 | 0.000619 | 0.0000238 | -2.26 | MRPL24         | mitochondrial ribosomal protein L24                                    | Downregulated |
| A_23_P120 | 0.000746 | 0.0000402 | -2.26 | ORMDL1         | ORMDL sphingolipid biosynthesis regulator 1                            | Downregulated |
| A_22_P000 | 0.000854 | 0.0000551 | -2.26 | lnc-GRHL2-1    | lnc-GRHL2-1:1                                                          | Downregulated |
| A_23_P366 | 0.000911 | 0.0000633 | -2.26 | SCRN1          | secernin 1                                                             | Downregulated |
| A_24_P388 | 0.001448 | 0.000169  | -2.26 | TPP1           | tripeptidyl peptidase I                                                | Downregulated |
| A_33_P366 | 0.00265  | 0.000469  | -2.26 | RHOT1          | ras homolog family member T1                                           | Downregulated |
| A_23_P250 | 0.005353 | 0.00134   | -2.26 | HACE1          | HECT domain and ankyrin repeat containing E3 ubiquitin protein ligase  | Downregulated |
| A_23_P355 | 0.000647 | 0.0000267 | -2.27 | EXOSC1         | exosome component 1                                                    | Downregulated |
| A_23_P611 | 0.000669 | 0.0000286 | -2.27 | INPP5D         | inositol polyphosphate-5-phosphatase, 145kDa                           | Downregulated |
| A_23_P856 | 0.000781 | 0.0000446 | -2.27 | GBP2           | guanylate binding protein 2, interferon-inducible                      | Downregulated |
| A_33_P321 | 0.000866 | 0.0000571 | -2.27 | CREB3L2        | cAMP responsive element binding protein 3-like 2                       | Downregulated |
| A_23_P137 | 0.001885 | 0.00027   | -2.27 | WRAP73         | WD repeat containing, antisense to TP73                                | Downregulated |
| A_21_P001 | 0.002196 | 0.000353  | -2.27 | TXLNGY         | taxilin gamma pseudogene, Y-linked                                     | Downregulated |
| A_33_P371 | 0.002768 | 0.000502  | -2.27 | ARHGAP42       | Rho GTPase activating protein 42                                       | Downregulated |
| A_23_P148 | 0.003473 | 0.000709  | -2.27 | EHBP1L1        | EH domain binding protein 1-like 1                                     | Downregulated |
| A_21_P001 | 0.005906 | 0.00155   | -2.27 | FAM185A        | family with sequence similarity 185, member A                          | Downregulated |
| A_21_P001 | 0.008618 | 0.00262   | -2.27 | XLOC_I2_006166 |                                                                        | Downregulated |
| A_24_P202 | 0.014929 | 0.00538   | -2.27 | SIPA1L3        | signal-induced proliferation-associated 1 like 3                       | Downregulated |
| A_23_P202 | 0.000596 | 0.0000211 | -2.28 | C11orf54       | chromosome 11 open reading frame 54                                    | Downregulated |
| A_21_P000 | 0.000654 | 0.0000273 | -2.28 | lnc-RPGRIP1    | lnc-RPGRIP1-2:1                                                        | Downregulated |
| A_23_P108 | 0.000788 | 0.0000456 | -2.28 | PPAP2C         | phosphatidic acid phosphatase type 2C                                  | Downregulated |
| A_33_P321 | 0.000795 | 0.0000469 | -2.28 | MED1           | mediator complex subunit 1                                             | Downregulated |

|           |          |           |       |              |                                                                           |               |
|-----------|----------|-----------|-------|--------------|---------------------------------------------------------------------------|---------------|
| A_24_P289 | 0.000901 | 0.0000614 | -2.28 | RNASET2      | ribonuclease T2                                                           | Downregulated |
| A_33_P329 | 0.001134 | 0.000106  | -2.28 | CNTLN        | centlein, centrosomal protein                                             | Downregulated |
| A_23_P923 | 0.001134 | 0.000106  | -2.28 | TMEM156      | transmembrane protein 156                                                 | Downregulated |
| A_33_P386 | 0.001405 | 0.00016   | -2.28 | MTMR10       | myotubularin related protein 10                                           | Downregulated |
| A_21_P000 | 0.001453 | 0.00017   | -2.28 | lnc-ABCA13-2 | lnc-ABCA13-2:1                                                            | Downregulated |
| A_21_P001 | 0.003527 | 0.000725  | -2.28 | LOC1019301   | uncharacterized LOC101930100                                              | Downregulated |
| A_21_P000 | 0.0077   | 0.00225   | -2.28 | SNORD21      | small nucleolar RNA, C/D box 21                                           | Downregulated |
| A_24_P226 | 0.012265 | 0.00417   | -2.28 | TOX          | thymocyte selection-associated high mobility group box                    | Downregulated |
| A_22_P000 | 0.000585 | 0.0000201 | -2.29 | lnc-GK-3     | lnc-GK-3:1                                                                | Downregulated |
| A_33_P324 | 0.000594 | 0.0000208 | -2.29 | ZEB2         | zinc finger E-box binding homeobox 2                                      | Downregulated |
| A_21_P000 | 0.000612 | 0.0000233 | -2.29 | MKRN1        | makorin ring finger protein 1                                             | Downregulated |
| A_33_P322 | 0.000636 | 0.0000254 | -2.29 | MRPL11       | mitochondrial ribosomal protein L11                                       | Downregulated |
| A_22_P000 | 0.000691 | 0.0000305 | -2.29 | lnc-UBLCP1-7 | lnc-UBLCP1-7:1                                                            | Downregulated |
| A_23_P387 | 0.000853 | 0.0000551 | -2.29 | SMCHD1       | structural maintenance of chromosomes flexible hinge domain containin     | Downregulated |
| A_23_P159 | 0.000938 | 0.0000672 | -2.29 | ADAM15       | ADAM metallopeptidase domain 15                                           | Downregulated |
| A_33_P333 | 0.000963 | 0.0000723 | -2.29 | TMEM59       | transmembrane protein 59                                                  | Downregulated |
| A_21_P000 | 0.001322 | 0.000143  | -2.29 | LOC1001315   | uncharacterized LOC100131564                                              | Downregulated |
| A_24_P753 | 0.001641 | 0.000212  | -2.29 | BMPR2        | bone morphogenetic protein receptor, type II (serine/threonine kinase)    | Downregulated |
| A_22_P000 | 0.001769 | 0.000242  | -2.29 | LOC1019273   | uncharacterized LOC101927365                                              | Downregulated |
| A_22_P000 | 0.002965 | 0.000557  | -2.29 | lnc-AC112512 | lnc-AC112512.1-1:1                                                        | Downregulated |
| A_23_P477 | 0.005063 | 0.00123   | -2.29 | METTL1       | methyltransferase like 1                                                  | Downregulated |
| A_21_P000 | 0.005417 | 0.00137   | -2.29 | VTRNA2-1     | vault RNA 2-1                                                             | Downregulated |
| A_24_P263 | 0.001066 | 0.0000924 | -2.3  | ATXN7L3B     | ataxin 7-like 3B                                                          | Downregulated |
| A_24_P132 | 0.001237 | 0.000126  | -2.3  | IKBKB        | inhibitor of kappa light polypeptide gene enhancer in B-cells, kinase bet | Downregulated |
| A_33_P328 | 0.001492 | 0.000179  | -2.3  | LMO7         | LIM domain 7                                                              | Downregulated |
| A_23_P991 | 0.001775 | 0.000243  | -2.3  | UBE3B        | ubiquitin protein ligase E3B                                              | Downregulated |
| A_21_P001 | 0.006541 | 0.00179   | -2.3  | ANKRD26P3    | ankyrin repeat domain 26 pseudogene 3                                     | Downregulated |
| A_21_P000 | 0.007979 | 0.00236   | -2.3  | ZDHC11       | zinc finger, DHHC-type containing 11                                      | Downregulated |
| A_23_P103 | 0.000707 | 0.0000343 | -2.31 | DTL          | denticleless E3 ubiquitin protein ligase homolog (Drosophila)             | Downregulated |
| A_33_P332 | 0.000797 | 0.0000471 | -2.31 | NDEL1        | nudE neurodevelopment protein 1-like 1                                    | Downregulated |
| A_23_P799 | 0.000855 | 0.0000555 | -2.31 | NOP56        | NOP56 ribonucleoprotein                                                   | Downregulated |
| A_33_P321 | 0.000866 | 0.0000572 | -2.31 | RFX7         | regulatory factor X, 7                                                    | Downregulated |
| A_23_P209 | 0.001394 | 0.000157  | -2.31 | PPM1G        | protein phosphatase, Mg <sup>2+</sup> /Mn <sup>2+</sup> dependent, 1G     | Downregulated |
| A_33_P335 | 0.001949 | 0.000286  | -2.31 | FAM122C      | family with sequence similarity 122C                                      | Downregulated |
| A_33_P339 | 0.00308  | 0.000591  | -2.31 | GNG12        | guanine nucleotide binding protein (G protein), gamma 12                  | Downregulated |
| A_23_P208 | 0.003529 | 0.000726  | -2.31 | LENG1        | leukocyte receptor cluster (LRC) member 1                                 | Downregulated |
| A_22_P000 | 0.005296 | 0.00132   | -2.31 | lnc-FITM2-1  | lnc-FITM2-1:1                                                             | Downregulated |

|           |          |           |       |                |                                                                            |               |
|-----------|----------|-----------|-------|----------------|----------------------------------------------------------------------------|---------------|
| A_23_P280 | 0.00685  | 0.00191   | -2.31 | ZNF558         | zinc finger protein 558                                                    | Downregulated |
| A_22_P000 | 0.007273 | 0.00207   | -2.31 | lnc-RTKN2-1    | lnc-RTKN2-1:1                                                              | Downregulated |
| A_33_P323 | 0.014406 | 0.00514   | -2.31 | LOC1001285     | uncharacterized LOC100128517                                               | Downregulated |
| A_33_P342 | 0.000578 | 0.0000189 | -2.32 | TRAF3IP3       | TRAF3 interacting protein 3                                                | Downregulated |
| A_33_P337 | 0.00062  | 0.000024  | -2.32 | ABCC10         | ATP-binding cassette, sub-family C (CFTR/MRP), member 10                   | Downregulated |
| A_23_P159 | 0.000693 | 0.0000309 | -2.32 | SSNA1          | Sjogren syndrome nuclear autoantigen 1                                     | Downregulated |
| A_23_P252 | 0.000848 | 0.0000542 | -2.32 | STK25          | serine/threonine kinase 25                                                 | Downregulated |
| A_33_P341 | 0.000945 | 0.000069  | -2.32 | RABGAP1        | RAB GTPase activating protein 1                                            | Downregulated |
| A_23_P371 | 0.000963 | 0.0000725 | -2.32 | CDYL2          | chromodomain protein, Y-like 2                                             | Downregulated |
| A_24_P241 | 0.002145 | 0.00034   | -2.32 | ZC3H14         | zinc finger CCCH-type containing 14                                        | Downregulated |
| A_23_P214 | 0.002991 | 0.000565  | -2.32 | GPX5           | glutathione peroxidase 5                                                   | Downregulated |
| A_24_P942 | 0.003041 | 0.00058   | -2.32 | ECT2L          | epithelial cell transforming 2 like                                        | Downregulated |
| A_21_P000 | 0.015034 | 0.00543   | -2.32 | LOC1009967     | uncharacterized LOC100996741                                               | Downregulated |
| A_33_P328 | 0.024503 | 0.01      | -2.32 | TRIM51HP       | tripartite motif-containing 51H, pseudogene                                | Downregulated |
| A_23_P177 | 0.000578 | 0.0000192 | -2.33 | DPAGT1         | dolichyl-phosphate (UDP-N-acetylglucosamine) N-acetylglucosaminepho        | Downregulated |
| A_23_P120 | 0.000709 | 0.0000351 | -2.33 | LBH            | limb bud and heart development                                             | Downregulated |
| A_23_P201 | 0.000711 | 0.0000357 | -2.33 | MAPKAPK2       | mitogen-activated protein kinase-activated protein kinase 2                | Downregulated |
| A_33_P326 | 0.000855 | 0.0000555 | -2.33 | CD160          | CD160 molecule                                                             | Downregulated |
| A_23_P114 | 0.001029 | 0.0000846 | -2.33 | HDAC1          | histone deacetylase 1                                                      | Downregulated |
| A_23_P150 | 0.001214 | 0.000122  | -2.33 | MRE11A         | MRE11 meiotic recombination 11 homolog A (S. cerevisiae)                   | Downregulated |
| A_23_P649 | 0.001267 | 0.000133  | -2.33 | RIC8B          | RIC8 guanine nucleotide exchange factor B                                  | Downregulated |
| A_32_P225 | 0.001403 | 0.000159  | -2.33 | FAM187B        | family with sequence similarity 187, member B                              | Downregulated |
| A_24_P100 | 0.001557 | 0.000192  | -2.33 | CYB5R3         | cytochrome b5 reductase 3                                                  | Downregulated |
| A_23_P129 | 0.005096 | 0.00125   | -2.33 | TARSL2         | threonyl-tRNA synthetase-like 2                                            | Downregulated |
| A_23_P102 | 0.025103 | 0.0103    | -2.33 | CHST10         | carbohydrate sulfotransferase 10                                           | Downregulated |
| A_33_P334 | 0.000578 | 0.0000194 | -2.34 | RAB28          | RAB28, member RAS oncogene family                                          | Downregulated |
| A_23_P124 | 0.00061  | 0.0000231 | -2.34 | ZCCHC7         | zinc finger, CCHC domain containing 7                                      | Downregulated |
| A_23_P143 | 0.00075  | 0.0000405 | -2.34 | ARID5A         | AT rich interactive domain 5A (MRF1-like)                                  | Downregulated |
| A_33_P337 | 0.000971 | 0.0000741 | -2.34 | MED25          | mediator complex subunit 25                                                | Downregulated |
| A_33_P340 | 0.001121 | 0.000104  | -2.34 | PLEKHM1        | pleckstrin homology domain containing, family M (with RUN domain) mer      | Downregulated |
| A_23_P226 | 0.001691 | 0.000223  | -2.34 | SLC9A6         | solute carrier family 9, subfamily A (NHE6, cation proton antiporter 6), m | Downregulated |
| A_33_P325 | 0.000597 | 0.0000213 | -2.35 | CRIP1          | cysteine-rich protein 1 (intestinal)                                       | Downregulated |
| A_23_P396 | 0.000801 | 0.0000478 | -2.35 | NIN            | ninein (GSK3B interacting protein)                                         | Downregulated |
| A_24_P167 | 0.001386 | 0.000155  | -2.35 | VPS39          | vacuolar protein sorting 39 homolog (S. cerevisiae)                        | Downregulated |
| A_33_P328 | 0.004021 | 0.000879  | -2.35 | TMEM254        | transmembrane protein 254                                                  | Downregulated |
| A_23_P595 | 0.004433 | 0.00102   | -2.35 | ACN9           | ACN9 homolog (S. cerevisiae)                                               | Downregulated |
| A_21_P001 | 0.005135 | 0.00126   | -2.35 | XLOC_I2_003992 |                                                                            | Downregulated |



|           |          |           |       |             |                                                                     |               |
|-----------|----------|-----------|-------|-------------|---------------------------------------------------------------------|---------------|
| A_22_P000 | 0.007457 | 0.00215   | -2.35 | lnc-SNURF-3 | lnc-SNURF-3:21                                                      | Downregulated |
| A_22_P000 | 0.007547 | 0.00219   | -2.35 | DIAPH2-AS1  | DIAPH2 antisense RNA 1                                              | Downregulated |
| A_33_P338 | 0.009895 | 0.00315   | -2.35 | FPGT        | fucose-1-phosphate guanylyltransferase                              | Downregulated |
| A_21_P001 | 0.000603 | 0.0000224 | -2.36 | LOC1027248  | uncharacterized LOC102724889                                        | Downregulated |
| A_24_P787 | 0.001197 | 0.000118  | -2.36 | YPEL2       | yippee-like 2 (Drosophila)                                          | Downregulated |
| A_23_P142 | 0.001705 | 0.000228  | -2.36 | ZNF513      | zinc finger protein 513                                             | Downregulated |
| A_23_P433 | 0.002887 | 0.000535  | -2.36 | MLANA       | melan-A                                                             | Downregulated |
| A_23_P831 | 0.00856  | 0.00259   | -2.36 | ABHD17B     | abhydrolase domain containing 17B                                   | Downregulated |
| A_33_P338 | 0.008606 | 0.00261   | -2.36 | RPPH1       | ribonuclease P RNA component H1                                     | Downregulated |
| A_21_P001 | 0.008661 | 0.00264   | -2.36 | TRANK1      | tetratricopeptide repeat and ankyrin repeat containing 1            | Downregulated |
| A_33_P337 | 0.000577 | 0.0000184 | -2.37 | TPPP        | tubulin polymerization promoting protein                            | Downregulated |
| A_33_P339 | 0.000605 | 0.0000228 | -2.37 | SLC2A6      | solute carrier family 2 (facilitated glucose transporter), member 6 | Downregulated |
| A_32_P486 | 0.000788 | 0.0000456 | -2.37 | IGSF22      | immunoglobulin superfamily, member 22                               | Downregulated |
| A_23_P883 | 0.000812 | 0.0000494 | -2.37 | EPHX2       | epoxide hydrolase 2, cytoplasmic                                    | Downregulated |
| A_23_P399 | 0.004499 | 0.00104   | -2.37 | ACTG2       | actin, gamma 2, smooth muscle, enteric                              | Downregulated |
| A_24_P305 | 0.005211 | 0.00129   | -2.37 | GATAD2A     | GATA zinc finger domain containing 2A                               | Downregulated |
| A_23_P418 | 0.008825 | 0.0027    | -2.37 | ATPAF2      | ATP synthase mitochondrial F1 complex assembly factor 2             | Downregulated |
| A_23_P212 | 0.011673 | 0.00391   | -2.37 | TBL1XR1     | transducin (beta)-like 1 X-linked receptor 1                        | Downregulated |
| A_23_P140 | 0.00057  | 0.0000172 | -2.38 | IFI27L2     | interferon, alpha-inducible protein 27-like 2                       | Downregulated |
| A_23_P202 | 0.000612 | 0.0000233 | -2.38 | APLP2       | amyloid beta (A4) precursor-like protein 2                          | Downregulated |
| A_33_P328 | 0.000622 | 0.0000244 | -2.38 | METTL15     | methyltransferase like 15                                           | Downregulated |
| A_23_P166 | 0.000626 | 0.0000247 | -2.38 | RASSF2      | Ras association (RalGDS/AF-6) domain family member 2                | Downregulated |
| A_23_P118 | 0.001405 | 0.00016   | -2.38 | BIRC5       | baculoviral IAP repeat containing 5                                 | Downregulated |
| A_23_P393 | 0.002033 | 0.00031   | -2.38 | IGHMBP2     | immunoglobulin mu binding protein 2                                 | Downregulated |
| A_23_P388 | 0.002738 | 0.000493  | -2.38 | C4orf3      | chromosome 4 open reading frame 3                                   | Downregulated |
| A_33_P342 | 0.002897 | 0.000538  | -2.38 | PALLD       | palladin, cytoskeletal associated protein                           | Downregulated |
| A_23_P974 | 0.003293 | 0.000657  | -2.38 | UBE2Q1      | ubiquitin-conjugating enzyme E2Q family member 1                    | Downregulated |
| A_33_P333 | 0.003825 | 0.000818  | -2.38 | ALDH3A2     | aldehyde dehydrogenase 3 family, member A2                          | Downregulated |
| A_23_P404 | 0.006699 | 0.00185   | -2.38 | CREBRF      | CREB3 regulatory factor                                             | Downregulated |
| A_23_P747 | 0.007611 | 0.00221   | -2.38 | EYA3        | EYA transcriptional coactivator and phosphatase 3                   | Downregulated |
| A_33_P321 | 0.008008 | 0.00237   | -2.38 | C6orf89     | chromosome 6 open reading frame 89                                  | Downregulated |
| A_22_P000 | 0.015796 | 0.00578   | -2.38 | lnc-NUCB2-1 | lnc-NUCB2-1:1                                                       | Downregulated |
| A_23_P123 | 0.000605 | 0.0000228 | -2.39 | GLDC        | glycine dehydrogenase (decarboxylating)                             | Downregulated |
| A_24_P182 | 0.001125 | 0.000104  | -2.39 | CELSR2      | cadherin, EGF LAG seven-pass G-type receptor 2                      | Downregulated |
| A_21_P000 | 0.001202 | 0.000119  | -2.39 | FAM174B     | family with sequence similarity 174, member B                       | Downregulated |
| A_24_P253 | 0.002901 | 0.000539  | -2.39 | DBF4B       | DBF4 zinc finger B                                                  | Downregulated |
| A_22_P000 | 0.009588 | 0.00302   | -2.39 | lnc-CLCN6-1 | lnc-CLCN6-1:2                                                       | Downregulated |

|           |          |           |       |              |                                                                    |               |
|-----------|----------|-----------|-------|--------------|--------------------------------------------------------------------|---------------|
| A_32_P151 | 0.000577 | 0.0000179 | -2.4  | FAM72D       | family with sequence similarity 72, member D                       | Downregulated |
| A_21_P000 | 0.000673 | 0.0000291 | -2.4  | SNORD82      | small nucleolar RNA, C/D box 82                                    | Downregulated |
| A_22_P000 | 0.000706 | 0.0000334 | -2.4  | lnc-MAP3K12  | lnc-MAP3K12-1:1                                                    | Downregulated |
| A_22_P000 | 0.000742 | 0.0000396 | -2.4  | lnc-GLIPR1-3 | lnc-GLIPR1-3:1                                                     | Downregulated |
| A_23_P121 | 0.000991 | 0.0000773 | -2.4  | TSHB         | thyroid stimulating hormone, beta                                  | Downregulated |
| A_23_P371 | 0.001029 | 0.0000846 | -2.4  | ZNF227       | zinc finger protein 227                                            | Downregulated |
| A_22_P000 | 0.001295 | 0.000137  | -2.4  | LOC1005068   | uncharacterized LOC100506844                                       | Downregulated |
| A_23_P157 | 0.005544 | 0.00141   | -2.4  | INVS         | inversin                                                           | Downregulated |
| A_33_P328 | 0.005673 | 0.00146   | -2.4  | CTNNBIP1     | catenin, beta interacting protein 1                                | Downregulated |
| A_19_P003 | 0.008172 | 0.00244   | -2.4  | LOC1010599   | uncharacterized LOC101059954                                       | Downregulated |
| A_23_P110 | 0.009995 | 0.00319   | -2.4  | APBB3        | amyloid beta (A4) precursor protein-binding, family B, member 3    | Downregulated |
| A_21_P000 | 0.00056  | 0.0000165 | -2.41 | BZRAP1-AS1   | BZRAP1 antisense RNA 1                                             | Downregulated |
| A_23_P106 | 0.000618 | 0.0000237 | -2.41 | FOS          | FBJ murine osteosarcoma viral oncogene homolog                     | Downregulated |
| A_23_P659 | 0.00062  | 0.0000241 | -2.41 | ZFYVE19      | zinc finger, FYVE domain containing 19                             | Downregulated |
| A_19_P003 | 0.00064  | 0.0000259 | -2.41 | TSTD3        | thiosulfate sulfurtransferase (rhodanese)-like domain containing 3 | Downregulated |
| A_23_P148 | 0.000669 | 0.0000285 | -2.41 | GNPTG        | N-acetylglucosamine-1-phosphate transferase, gamma subunit         | Downregulated |
| A_23_P818 | 0.000695 | 0.0000316 | -2.41 | TJAP1        | tight junction associated protein 1 (peripheral)                   | Downregulated |
| A_24_P134 | 0.000696 | 0.0000318 | -2.41 | RHBDD1       | rhomboid domain containing 1                                       | Downregulated |
| A_23_P500 | 0.001015 | 0.0000824 | -2.41 | KANK1        | KN motif and ankyrin repeat domains 1                              | Downregulated |
| A_23_P742 | 0.001268 | 0.000133  | -2.41 | GBP5         | guanylate binding protein 5                                        | Downregulated |
| A_24_P227 | 0.00189  | 0.000271  | -2.41 | KLC2         | kinesin light chain 2                                              | Downregulated |
| A_22_P000 | 0.004328 | 0.000984  | -2.41 | lnc-CDNF-1   | lnc-CDNF-1:1                                                       | Downregulated |
| A_21_P000 | 0.000596 | 0.0000211 | -2.42 | lnc-APBA2-2  | lnc-APBA2-2:1                                                      | Downregulated |
| A_33_P322 | 0.000603 | 0.0000224 | -2.42 | SLC12A9      | solute carrier family 12, member 9                                 | Downregulated |
| A_23_P117 | 0.000639 | 0.0000256 | -2.42 | WASH1        | WAS protein family homolog 1                                       | Downregulated |
| A_23_P388 | 0.000695 | 0.0000312 | -2.42 | ELAVL1       | ELAV like RNA binding protein 1                                    | Downregulated |
| A_33_P336 | 0.000792 | 0.0000463 | -2.42 | MPP2         | membrane protein, palmitoylated 2 (MAGUK p55 subfamily member 2)   | Downregulated |
| A_23_P106 | 0.000801 | 0.0000478 | -2.42 | RAB11FIP3    | RAB11 family interacting protein 3 (class II)                      | Downregulated |
| A_23_P283 | 0.001065 | 0.0000918 | -2.42 | NDUFAF7      | NADH dehydrogenase (ubiquinone) complex I, assembly factor 7       | Downregulated |
| A_33_P326 | 0.002006 | 0.000302  | -2.42 | UVRAG        | UV radiation resistance associated                                 | Downregulated |
| A_23_P370 | 0.00238  | 0.000398  | -2.42 | C12orf66     | chromosome 12 open reading frame 66                                | Downregulated |
| A_23_P893 | 0.016218 | 0.00599   | -2.42 | ZNF286A      | zinc finger protein 286A                                           | Downregulated |
| A_33_P323 | 0.000568 | 0.0000172 | -2.43 | DGKZ         | diacylglycerol kinase, zeta                                        | Downregulated |
| A_22_P000 | 0.000578 | 0.0000193 | -2.43 | FGF12-AS1    | FGF12 antisense RNA 1                                              | Downregulated |
| A_33_P381 | 0.000647 | 0.0000268 | -2.43 | GABARAPL1    | GABA(A) receptor-associated protein like 1                         | Downregulated |
| A_33_P339 | 0.001062 | 0.0000913 | -2.43 | TP53RK       | TP53 regulating kinase                                             | Downregulated |
| A_23_P139 | 0.001258 | 0.000131  | -2.43 | GNG3         | guanine nucleotide binding protein (G protein), gamma 3            | Downregulated |

|           |          |           |       |              |                                                                   |               |
|-----------|----------|-----------|-------|--------------|-------------------------------------------------------------------|---------------|
| A_33_P334 | 0.002219 | 0.000358  | -2.43 | CPTP         | ceramide-1-phosphate transfer protein                             | Downregulated |
| A_24_P132 | 0.003557 | 0.000735  | -2.43 | NAP1L4       | nucleosome assembly protein 1-like 4                              | Downregulated |
| A_22_P000 | 0.004306 | 0.000975  | -2.43 | THAP9-AS1    | THAP9 antisense RNA 1                                             | Downregulated |
| A_24_P509 | 0.006045 | 0.0016    | -2.43 | GOLGA6L6     | golgin A6 family-like 6                                           | Downregulated |
| A_23_P360 | 0.00899  | 0.00277   | -2.43 | CPNE5        | copine V                                                          | Downregulated |
| A_24_P185 | 0.009601 | 0.00302   | -2.43 | FAM134C      | family with sequence similarity 134, member C                     | Downregulated |
| A_23_P217 | 0.012702 | 0.00435   | -2.43 | TIMM8A       | translocase of inner mitochondrial membrane 8 homolog A (yeast)   | Downregulated |
| A_22_P000 | 0.000602 | 0.0000219 | -2.44 | lnc-CCNE2-1  | lnc-CCNE2-1:3                                                     | Downregulated |
| A_23_P126 | 0.000605 | 0.0000227 | -2.44 | EIF4G3       | eukaryotic translation initiation factor 4 gamma, 3               | Downregulated |
| A_24_P502 | 0.00067  | 0.0000288 | -2.44 | HLA-DMA      | major histocompatibility complex, class II, DM alpha              | Downregulated |
| A_21_P000 | 0.000793 | 0.0000466 | -2.44 | lnc-CCDC140  | lnc-CCDC140-2:1                                                   | Downregulated |
| A_23_P502 | 0.000871 | 0.0000578 | -2.44 | FYN          | FYN proto-oncogene, Src family tyrosine kinase                    | Downregulated |
| A_22_P000 | 0.000883 | 0.0000591 | -2.44 | LOC1009965   | uncharacterized LOC100996579                                      | Downregulated |
| A_23_P705 | 0.001062 | 0.0000907 | -2.44 | SLC39A7      | solute carrier family 39 (zinc transporter), member 7             | Downregulated |
| A_22_P000 | 0.001714 | 0.000229  | -2.44 | lnc-APOC3-6  | lnc-APOC3-6:1                                                     | Downregulated |
| A_24_P544 | 0.007028 | 0.00198   | -2.44 | SSR1         | signal sequence receptor, alpha                                   | Downregulated |
| A_33_P324 | 0.007298 | 0.00208   | -2.44 | FAM72A       | family with sequence similarity 72, member A                      | Downregulated |
| A_33_P325 | 0.000565 | 0.000017  | -2.45 | N6AMT1       | N-6 adenine-specific DNA methyltransferase 1 (putative)           | Downregulated |
| A_33_P346 | 0.000819 | 0.0000505 | -2.45 | lnc-NMNAT2-2 | lnc-NMNAT2-2:1                                                    | Downregulated |
| A_21_P000 | 0.000995 | 0.0000786 | -2.45 | SNORD32A     | small nucleolar RNA, C/D box 32A                                  | Downregulated |
| A_21_P000 | 0.001057 | 0.0000901 | -2.45 | lnc-KLHL25-9 | lnc-KLHL25-9:1                                                    | Downregulated |
| A_24_P706 | 0.001455 | 0.000171  | -2.45 | HNRNPA3      | heterogeneous nuclear ribonucleoprotein A3                        | Downregulated |
| A_23_P132 | 0.001504 | 0.000181  | -2.45 | MPST         | mercaptopyruvate sulfurtransferase                                | Downregulated |
| A_23_P411 | 0.002951 | 0.000553  | -2.45 | WDR90        | WD repeat domain 90                                               | Downregulated |
| A_23_P132 | 0.000568 | 0.0000172 | -2.46 | MSL2         | male-specific lethal 2 homolog (Drosophila)                       | Downregulated |
| A_33_P323 | 0.000577 | 0.0000181 | -2.46 | BOLA2B       | bolA family member 2B                                             | Downregulated |
| A_23_P329 | 0.000821 | 0.0000509 | -2.46 | JAK3         | Janus kinase 3                                                    | Downregulated |
| A_33_P333 | 0.000905 | 0.0000622 | -2.46 | DTNBP1       | dystrobrevin binding protein 1                                    | Downregulated |
| A_33_P328 | 0.000995 | 0.0000789 | -2.46 | TMEM254      | transmembrane protein 254                                         | Downregulated |
| A_23_P121 | 0.001528 | 0.000186  | -2.46 | CSRNP1       | cysteine-serine-rich nuclear protein 1                            | Downregulated |
| A_22_P000 | 0.001676 | 0.000219  | -2.46 | lnc-SCAPER-1 | lnc-SCAPER-1:1                                                    | Downregulated |
| A_24_P628 | 0.001937 | 0.000283  | -2.46 | STAM2        | signal transducing adaptor molecule (SH3 domain and ITAM motif) 2 | Downregulated |
| A_23_P200 | 0.001943 | 0.000284  | -2.46 | TXNDC12      | thioredoxin domain containing 12 (endoplasmic reticulum)          | Downregulated |
| A_33_P354 | 0.001956 | 0.000289  | -2.46 | IL17RA       | interleukin 17 receptor A                                         | Downregulated |
| A_23_P312 | 0.002009 | 0.000303  | -2.46 | ALMS1        | Alstrom syndrome 1                                                | Downregulated |
| A_22_P000 | 0.003779 | 0.000803  | -2.46 | lnc-GGH-1    | lnc-GGH-1:1                                                       | Downregulated |
| A_23_P148 | 0.005795 | 0.0015    | -2.46 | ZDHHC9       | zinc finger, DHHC-type containing 9                               | Downregulated |

|           |          |           |       |              |                                                        |               |
|-----------|----------|-----------|-------|--------------|--------------------------------------------------------|---------------|
| A_23_P869 | 0.010923 | 0.00357   | -2.46 | B4GAT1       | beta-1,4-glucuronyltransferase 1                       | Downregulated |
| A_33_P327 | 0.000805 | 0.0000484 | -2.47 | ARFGAP2      | ADP-ribosylation factor GTPase activating protein 2    | Downregulated |
| A_23_P415 | 0.001899 | 0.000273  | -2.47 | KLF9         | Kruppel-like factor 9                                  | Downregulated |
| A_22_P000 | 0.003936 | 0.000854  | -2.47 | lnc-SMG1-2   | lnc-SMG1-2:1                                           | Downregulated |
| A_33_P322 | 0.004843 | 0.00116   | -2.47 | NPHP3        | nephronophthisis 3 (adolescent)                        | Downregulated |
| A_23_P121 | 0.007132 | 0.00202   | -2.47 | TBCCD1       | TBCC domain containing 1                               | Downregulated |
| A_21_P001 | 0.000648 | 0.0000268 | -2.48 | NNT-AS1      | NNT antisense RNA 1                                    | Downregulated |
| A_23_P105 | 0.000689 | 0.0000303 | -2.48 | FRY          | furry homolog (Drosophila)                             | Downregulated |
| A_22_P000 | 0.000766 | 0.0000428 | -2.48 | DCP1A        | decapping mRNA 1A                                      | Downregulated |
| A_23_P121 | 0.002427 | 0.00041   | -2.48 | CYB561D2     | cytochrome b561 family, member D2                      | Downregulated |
| A_23_P210 | 0.003191 | 0.000627  | -2.48 | RTFDC1       | replication termination factor 2 domain containing 1   | Downregulated |
| A_23_P749 | 0.003966 | 0.000863  | -2.48 | MR1          | major histocompatibility complex, class I-related      | Downregulated |
| A_23_P202 | 0.008622 | 0.00262   | -2.48 | MCMBP        | minichromosome maintenance complex binding protein     | Downregulated |
| A_23_P107 | 0.010485 | 0.0034    | -2.48 | TMEM11       | transmembrane protein 11                               | Downregulated |
| A_23_P257 | 0.000603 | 0.000022  | -2.49 | SRA1         | steroid receptor RNA activator 1                       | Downregulated |
| A_23_P442 | 0.001054 | 0.0000893 | -2.49 | CLASP2       | cytoplasmic linker associated protein 2                | Downregulated |
| A_33_P330 | 0.001194 | 0.000117  | -2.49 | METTL15      | methyltransferase like 15                              | Downregulated |
| A_22_P000 | 0.001263 | 0.000132  | -2.49 | PHKA2-AS1    | PHKA2 antisense RNA 1                                  | Downregulated |
| A_23_P236 | 0.001492 | 0.000179  | -2.49 | USF1         | upstream transcription factor 1                        | Downregulated |
| A_22_P000 | 0.001839 | 0.000259  | -2.49 | LOC1019270   | uncharacterized LOC101927027                           | Downregulated |
| A_19_P003 | 0.000537 | 0.0000141 | -2.5  | ZNF678       | zinc finger protein 678                                | Downregulated |
| A_33_P335 | 0.000571 | 0.0000173 | -2.5  | SOS1         | son of sevenless homolog 1 (Drosophila)                | Downregulated |
| A_24_P945 | 0.00062  | 0.0000241 | -2.5  | SKA2         | spindle and kinetochore associated complex subunit 2   | Downregulated |
| A_23_P201 | 0.000695 | 0.0000317 | -2.5  | S100A6       | S100 calcium binding protein A6                        | Downregulated |
| A_19_P003 | 0.000803 | 0.0000481 | -2.5  | lnc-SPAG1-3  | lnc-SPAG1-3:3                                          | Downregulated |
| A_21_P000 | 0.000964 | 0.0000729 | -2.5  | SNORD32B     | small nucleolar RNA, C/D box 32B                       | Downregulated |
| A_23_P847 | 0.002688 | 0.00048   | -2.5  | TNFRSF13B    | tumor necrosis factor receptor superfamily, member 13B | Downregulated |
| A_33_P333 | 0.006915 | 0.00194   | -2.5  | SDCCAG3      | serologically defined colon cancer antigen 3           | Downregulated |
| A_33_P330 | 0.007099 | 0.00201   | -2.5  | EID1         | EP300 interacting inhibitor of differentiation 1       | Downregulated |
| A_21_P001 | 0.009497 | 0.00298   | -2.5  | LOC1019285   | uncharacterized LOC101928595                           | Downregulated |
| A_33_P387 | 0.000577 | 0.0000186 | -2.51 | TRIM39-RPP21 | TRIM39-RPP21 readthrough                               | Downregulated |
| A_32_P466 | 0.000601 | 0.0000217 | -2.51 | IRF2BPL      | interferon regulatory factor 2 binding protein-like    | Downregulated |
| A_33_P327 | 0.000724 | 0.0000375 | -2.51 | TARDBP       | TAR DNA binding protein                                | Downregulated |
| A_22_P000 | 0.002018 | 0.000305  | -2.51 | RNASEH2B-AS1 | RNASEH2B antisense RNA 1                               | Downregulated |
| A_23_P216 | 0.004355 | 0.000994  | -2.51 | SLA          | Src-like-adaptor                                       | Downregulated |
| A_23_P163 | 0.005444 | 0.00138   | -2.51 | RBM4B        | RNA binding motif protein 4B                           | Downregulated |
| A_24_P392 | 0.009995 | 0.00319   | -2.51 | PSG8         | pregnancy specific beta-1-glycoprotein 8               | Downregulated |

|           |          |           |       |             |                                                                           |               |
|-----------|----------|-----------|-------|-------------|---------------------------------------------------------------------------|---------------|
| A_23_P368 | 0.000537 | 0.0000139 | -2.52 | SNX12       | sorting nexin 12                                                          | Downregulated |
| A_23_P411 | 0.000763 | 0.0000419 | -2.52 | CEBPB       | CCAAT/enhancer binding protein (C/EBP), beta                              | Downregulated |
| A_24_P116 | 0.000925 | 0.0000653 | -2.52 | GCOM1       | GRINL1A complex locus 1                                                   | Downregulated |
| A_22_P000 | 0.001014 | 0.0000822 | -2.52 | PAQR9-AS1   | PAQR9 antisense RNA 1                                                     | Downregulated |
| A_23_P301 | 0.001254 | 0.00013   | -2.52 | IP6K2       | inositol hexakisphosphate kinase 2                                        | Downregulated |
| A_23_P106 | 0.001349 | 0.000148  | -2.52 | GALNS       | galactosamine (N-acetyl)-6-sulfatase                                      | Downregulated |
| A_23_P118 | 0.002323 | 0.000384  | -2.52 | BCL7C       | B-cell CLL/lymphoma 7C                                                    | Downregulated |
| A_23_P769 | 0.003074 | 0.000589  | -2.52 | SIX1        | SIX homeobox 1                                                            | Downregulated |
| A_23_P125 | 0.000577 | 0.0000183 | -2.53 | IRF2        | interferon regulatory factor 2                                            | Downregulated |
| A_33_P325 | 0.000707 | 0.0000341 | -2.53 | VIMP        | VCP-interacting membrane protein                                          | Downregulated |
| A_32_P822 | 0.001349 | 0.000148  | -2.53 | GRM8        | glutamate receptor, metabotropic 8                                        | Downregulated |
| A_24_P136 | 0.001918 | 0.000278  | -2.53 | CA5BP1      | carbonic anhydrase VB pseudogene 1                                        | Downregulated |
| A_33_P335 | 0.003068 | 0.000588  | -2.53 | TSC1        | tuberous sclerosis 1                                                      | Downregulated |
| A_24_P680 | 0.008254 | 0.00247   | -2.53 | CCDC73      | coiled-coil domain containing 73                                          | Downregulated |
| A_23_P293 | 0.000808 | 0.0000489 | -2.54 | SAMM50      | SAMM50 sorting and assembly machinery component                           | Downregulated |
| A_33_P324 | 0.000887 | 0.0000597 | -2.54 | LOC1001298  | uncharacterized LOC100129888                                              | Downregulated |
| A_33_P327 | 0.002237 | 0.000363  | -2.54 | YIPF2       | Yip1 domain family, member 2                                              | Downregulated |
| A_21_P000 | 0.003986 | 0.000869  | -2.54 | Inc-SRSF2-1 | Inc-SRSF2-1:1                                                             | Downregulated |
| A_22_P000 | 0.008623 | 0.00262   | -2.54 | LOC1019291  | uncharacterized LOC101929162                                              | Downregulated |
| A_23_P141 | 0.000534 | 0.0000136 | -2.55 | GPR18       | G protein-coupled receptor 18                                             | Downregulated |
| A_23_P338 | 0.000719 | 0.0000369 | -2.55 | KDM1B       | lysine (K)-specific demethylase 1B                                        | Downregulated |
| A_23_P218 | 0.000863 | 0.0000566 | -2.55 | B9D2        | B9 protein domain 2                                                       | Downregulated |
| A_23_P390 | 0.000938 | 0.000067  | -2.55 | SMARCA4     | SWI/SNF related, matrix associated, actin dependent regulator of chrom    | Downregulated |
| A_33_P338 | 0.00152  | 0.000184  | -2.55 | ERCC5       | excision repair cross-complementation group 5                             | Downregulated |
| A_33_P337 | 0.001727 | 0.000232  | -2.55 | FAM117B     | family with sequence similarity 117, member B                             | Downregulated |
| A_23_P466 | 0.001919 | 0.000278  | -2.55 | LPGAT1      | lysophosphatidylglycerol acyltransferase 1                                | Downregulated |
| A_23_P164 | 0.002113 | 0.00033   | -2.55 | WDR7        | WD repeat domain 7                                                        | Downregulated |
| A_23_P360 | 0.003287 | 0.000655  | -2.55 | NUDT7       | nudix (nucleoside diphosphate linked moiety X)-type motif 7               | Downregulated |
| A_23_P220 | 0.000713 | 0.0000361 | -2.56 | TAOK3       | TAO kinase 3                                                              | Downregulated |
| A_23_P128 | 0.000715 | 0.0000363 | -2.56 | FBXO18      | F-box protein, helicase, 18                                               | Downregulated |
| A_21_P000 | 0.000727 | 0.0000378 | -2.56 | RAB30-AS1   | RAB30 antisense RNA 1 (head to head)                                      | Downregulated |
| A_33_P329 | 0.000728 | 0.0000381 | -2.56 | COPS7B      | COP9 signalosome subunit 7B                                               | Downregulated |
| A_23_P852 | 0.000791 | 0.0000461 | -2.56 | TTN         | titin                                                                     | Downregulated |
| A_23_P164 | 0.001635 | 0.00021   | -2.56 | RCE1        | Ras converting CAAX endopeptidase 1                                       | Downregulated |
| A_23_P845 | 0.001799 | 0.000248  | -2.56 | MZB1        | marginal zone B and B1 cell-specific protein                              | Downregulated |
| A_33_P324 | 0.002101 | 0.000327  | -2.56 | IKBKB       | inhibitor of kappa light polypeptide gene enhancer in B-cells, kinase bet | Downregulated |
| A_33_P337 | 0.003804 | 0.000812  | -2.56 | DDX51       | DEAD (Asp-Glu-Ala-Asp) box polypeptide 51                                 | Downregulated |

|           |          |           |       |                |                                                                            |               |
|-----------|----------|-----------|-------|----------------|----------------------------------------------------------------------------|---------------|
| A_23_P759 | 0.006531 | 0.00179   | -2.56 | RNF121         | ring finger protein 121                                                    | Downregulated |
| A_24_P601 | 0.008888 | 0.00273   | -2.56 | C2orf74        | chromosome 2 open reading frame 74                                         | Downregulated |
| A_21_P000 | 0.000578 | 0.0000188 | -2.57 | lnc-DDX51-4    | lnc-DDX51-4:1                                                              | Downregulated |
| A_23_P141 | 0.000578 | 0.0000194 | -2.57 | SERTAD3        | SERTA domain containing 3                                                  | Downregulated |
| A_23_P146 | 0.000739 | 0.0000392 | -2.57 | ASAP1-IT1      | ASAP1 intronic transcript 1 (non-protein coding)                           | Downregulated |
| A_23_P134 | 0.000784 | 0.0000451 | -2.57 | NUDT1          | nudix (nucleoside diphosphate linked moiety X)-type motif 1                | Downregulated |
| A_21_P000 | 0.000794 | 0.0000467 | -2.57 | SNORA14B       | small nucleolar RNA, H/ACA box 14B                                         | Downregulated |
| A_21_P001 | 0.000905 | 0.0000622 | -2.57 | LOC1019284     | uncharacterized LOC101928461                                               | Downregulated |
| A_22_P000 | 0.001047 | 0.0000881 | -2.57 | SVIL-AS1       | SVIL antisense RNA 1                                                       | Downregulated |
| A_23_P682 | 0.001062 | 0.0000909 | -2.57 | TTN            | titin                                                                      | Downregulated |
| A_22_P000 | 0.001697 | 0.000225  | -2.57 | lnc-USP50-1    | lnc-USP50-1:1                                                              | Downregulated |
| A_33_P325 | 0.001914 | 0.000277  | -2.57 | AIDA           | axin interactor, dorsalization associated                                  | Downregulated |
| A_22_P000 | 0.002351 | 0.000391  | -2.57 | NEURL4         | neuralized E3 ubiquitin protein ligase 4                                   | Downregulated |
| A_23_P152 | 0.003586 | 0.000746  | -2.57 | E2F4           | E2F transcription factor 4, p107/p130-binding                              | Downregulated |
| A_23_P287 | 0.000577 | 0.0000181 | -2.58 | DBNDD2         | dysbindin (dystrobrevin binding protein 1) domain containing 2             | Downregulated |
| A_23_P141 | 0.000707 | 0.0000344 | -2.58 | RDM1           | RAD52 motif containing 1                                                   | Downregulated |
| A_23_P398 | 0.00098  | 0.0000758 | -2.58 | TTC31          | tetratricopeptide repeat domain 31                                         | Downregulated |
| A_23_P101 | 0.001018 | 0.0000827 | -2.58 | ZFP36L2        | ZFP36 ring finger protein-like 2                                           | Downregulated |
| A_22_P000 | 0.004602 | 0.00108   | -2.58 | lnc-SP140-2    | lnc-SP140-2:1                                                              | Downregulated |
| A_23_P162 | 0.00536  | 0.00135   | -2.58 | WNT10B         | wingless-type MMTV integration site family, member 10B                     | Downregulated |
| A_24_P192 | 0.001952 | 0.000287  | -2.59 | MLLT3          | myeloid/lymphoid or mixed-lineage leukemia (trithorax homolog, Drosophila) | Downregulated |
| A_33_P322 | 0.001964 | 0.000291  | -2.59 | lnc-DLX2-4     | lnc-DLX2-4:3                                                               | Downregulated |
| A_33_P339 | 0.00206  | 0.000317  | -2.59 | MRPL4          | mitochondrial ribosomal protein L4                                         | Downregulated |
| A_21_P000 | 0.002163 | 0.000344  | -2.59 | lnc-BOD1-1     | lnc-BOD1-1:7                                                               | Downregulated |
| A_33_P330 | 0.002901 | 0.000539  | -2.59 | ALOX12-AS1     | ALOX12 antisense RNA 1                                                     | Downregulated |
| A_23_P416 | 0.003667 | 0.000769  | -2.59 | PIF1           | PIF1 5'-to-3' DNA helicase                                                 | Downregulated |
| A_33_P334 | 0.010001 | 0.00319   | -2.59 | HIP1           | huntingtin interacting protein 1                                           | Downregulated |
| A_23_P347 | 0.011519 | 0.00384   | -2.59 | MTSS1          | metastasis suppressor 1                                                    | Downregulated |
| A_22_P000 | 0.001257 | 0.00013   | -2.6  | lnc-SLC25A19-1 | lnc-SLC25A19-1:1                                                           | Downregulated |
| A_21_P000 | 0.00141  | 0.000161  | -2.6  | LOC1001315     | uncharacterized LOC100131564                                               | Downregulated |
| A_21_P000 | 0.00165  | 0.000213  | -2.6  | lnc-DLEU1-1    | lnc-DLEU1-1:1                                                              | Downregulated |
| A_33_P336 | 0.002968 | 0.000559  | -2.6  | DNAJC15        | DnaJ (Hsp40) homolog, subfamily C, member 15                               | Downregulated |
| A_24_P166 | 0.008188 | 0.00244   | -2.6  | IMPAD1         | inositol monophosphatase domain containing 1                               | Downregulated |
| A_23_P446 | 0.000526 | 0.0000124 | -2.61 | CRIP1          | cysteine-rich protein 1 (intestinal)                                       | Downregulated |
| A_21_P001 | 0.00055  | 0.0000151 | -2.61 | XLOC_I2_001066 |                                                                            | Downregulated |
| A_23_P149 | 0.000575 | 0.0000176 | -2.61 | PDLIM1         | PDZ and LIM domain 1                                                       | Downregulated |
| A_23_P202 | 0.000805 | 0.0000482 | -2.61 | COMMD5         | COMM domain containing 5                                                   | Downregulated |

|           |          |           |       |               |                                                                      |               |
|-----------|----------|-----------|-------|---------------|----------------------------------------------------------------------|---------------|
| A_33_P327 | 0.000954 | 0.0000704 | -2.61 | NADK          | NAD kinase                                                           | Downregulated |
| A_33_P328 | 0.001397 | 0.000157  | -2.61 | SSX2IP        | synovial sarcoma, X breakpoint 2 interacting protein                 | Downregulated |
| A_21_P000 | 0.002062 | 0.000318  | -2.61 | TSFM          | Ts translation elongation factor, mitochondrial                      | Downregulated |
| A_23_P145 | 0.002081 | 0.000322  | -2.61 | GPR65         | G protein-coupled receptor 65                                        | Downregulated |
| A_23_P302 | 0.002571 | 0.000449  | -2.61 | PCYOX1L       | prenylcysteine oxidase 1 like                                        | Downregulated |
| A_23_P565 | 0.003543 | 0.000731  | -2.61 | ITGA4         | integrin, alpha 4 (antigen CD49D, alpha 4 subunit of VLA-4 receptor) | Downregulated |
| A_24_P379 | 0.0038   | 0.00081   | -2.61 | RPS14         | ribosomal protein S14                                                | Downregulated |
| A_33_P367 | 0.003815 | 0.000815  | -2.61 | USP28         | ubiquitin specific peptidase 28                                      | Downregulated |
| A_23_P115 | 0.000597 | 0.0000214 | -2.62 | VPS72         | vacuolar protein sorting 72 homolog (S. cerevisiae)                  | Downregulated |
| A_19_P008 | 0.000792 | 0.0000463 | -2.62 | LOC1019293    | uncharacterized LOC101929378                                         | Downregulated |
| A_21_P000 | 0.00124  | 0.000127  | -2.62 | lnc-PCF11-1   | lnc-PCF11-1:12                                                       | Downregulated |
| A_23_P155 | 0.002693 | 0.000481  | -2.62 | CYTH4         | cytohesin 4                                                          | Downregulated |
| A_21_P001 | 0.006965 | 0.00196   | -2.62 | FTX           | FTX transcript, XIST regulator (non-protein coding)                  | Downregulated |
| A_24_P203 | 0.00067  | 0.0000288 | -2.63 | IL2RB         | interleukin 2 receptor, beta                                         | Downregulated |
| A_21_P000 | 0.00071  | 0.0000354 | -2.63 | SNORD20       | small nucleolar RNA, C/D box 20                                      | Downregulated |
| A_33_P324 | 0.000719 | 0.0000369 | -2.63 | CTSD          | cathepsin D                                                          | Downregulated |
| A_24_P371 | 0.000819 | 0.0000505 | -2.63 | SLC35G2       | solute carrier family 35, member G2                                  | Downregulated |
| A_21_P000 | 0.000959 | 0.0000714 | -2.63 | lnc-VEGFC-1   | lnc-VEGFC-1:1                                                        | Downregulated |
| A_23_P902 | 0.000959 | 0.0000714 | -2.63 | ZNF585B       | zinc finger protein 585B                                             | Downregulated |
| A_33_P376 | 0.001129 | 0.000105  | -2.63 | PIGU          | phosphatidylinositol glycan anchor biosynthesis, class U             | Downregulated |
| A_22_P000 | 0.00773  | 0.00226   | -2.63 | lnc-S1PR1-1   | lnc-S1PR1-1:1                                                        | Downregulated |
| A_21_P000 | 0.011169 | 0.00368   | -2.63 | SNORD26       | small nucleolar RNA, C/D box 26                                      | Downregulated |
| A_23_P135 | 0.000526 | 0.0000128 | -2.64 | PLAA          | phospholipase A2-activating protein                                  | Downregulated |
| A_24_P231 | 0.00056  | 0.000016  | -2.64 | DNPEP         | aspartyl aminopeptidase                                              | Downregulated |
| A_23_P102 | 0.000707 | 0.0000342 | -2.64 | BANK1         | B-cell scaffold protein with ankyrin repeats 1                       | Downregulated |
| A_33_P324 | 0.000928 | 0.0000657 | -2.64 | CNOT6L        | CCR4-NOT transcription complex, subunit 6-like                       | Downregulated |
| A_24_P159 | 0.000998 | 0.0000798 | -2.64 | PAK6          | p21 protein (Cdc42/Rac)-activated kinase 6                           | Downregulated |
| A_23_P976 | 0.001008 | 0.0000813 | -2.64 | CNTROB        | centrobin, centrosomal BRCA2 interacting protein                     | Downregulated |
| A_23_P154 | 0.001171 | 0.000113  | -2.64 | BACE2         | beta-site APP-cleaving enzyme 2                                      | Downregulated |
| A_22_P000 | 0.001266 | 0.000133  | -2.64 | lnc-NSUN6-1   | lnc-NSUN6-1:1                                                        | Downregulated |
| A_23_P596 | 0.002101 | 0.000327  | -2.64 | NPVF          | neuropeptide VF precursor                                            | Downregulated |
| A_33_P321 | 0.002276 | 0.000373  | -2.64 | AAK1          | AP2 associated kinase 1                                              | Downregulated |
| A_23_P358 | 0.00412  | 0.000911  | -2.64 | PRIMPOL       | primase and polymerase (DNA-directed)                                | Downregulated |
| A_21_P000 | 0.007766 | 0.00227   | -2.64 | lnc-HMG20A-1  | lnc-HMG20A-5:1                                                       | Downregulated |
| A_33_P322 | 0.00067  | 0.0000289 | -2.65 | MTMR10        | myotubularin related protein 10                                      | Downregulated |
| A_22_P000 | 0.000765 | 0.0000424 | -2.65 | lnc-ZC3H12D-1 | lnc-ZC3H12D-2:1                                                      | Downregulated |
| A_33_P322 | 0.000866 | 0.0000571 | -2.65 | KIF21B        | kinesin family member 21B                                            | Downregulated |

|           |          |           |       |               |                                                                        |               |
|-----------|----------|-----------|-------|---------------|------------------------------------------------------------------------|---------------|
| A_33_P329 | 0.000942 | 0.0000684 | -2.65 | UBIAD1        | UbiA prenyltransferase domain containing 1                             | Downregulated |
| A_24_P942 | 0.001163 | 0.000112  | -2.65 | TMX4          | thioredoxin-related transmembrane protein 4                            | Downregulated |
| A_22_P000 | 0.002572 | 0.000449  | -2.65 | IFNG-AS1      | IFNG antisense RNA 1                                                   | Downregulated |
| A_23_P577 | 0.006659 | 0.00184   | -2.65 | DRD3          | dopamine receptor D3                                                   | Downregulated |
| A_33_P324 | 0.000563 | 0.0000168 | -2.66 | NSUN4         | NOP2/Sun domain family, member 4                                       | Downregulated |
| A_23_P122 | 0.00065  | 0.000027  | -2.66 | CCNB1         | cyclin B1                                                              | Downregulated |
| A_23_P153 | 0.000673 | 0.000029  | -2.66 | XRCC1         | X-ray repair complementing defective repair in Chinese hamster cells 1 | Downregulated |
| A_33_P323 | 0.000707 | 0.0000336 | -2.66 | KIAA1217      | KIAA1217                                                               | Downregulated |
| A_23_P147 | 0.000721 | 0.0000373 | -2.66 | KIF13B        | kinesin family member 13B                                              | Downregulated |
| A_33_P323 | 0.001066 | 0.0000923 | -2.66 | MTMR3         | myotubularin related protein 3                                         | Downregulated |
| A_22_P000 | 0.00129  | 0.000136  | -2.66 | lnc-DPCD-1    | lnc-DPCD-1:1                                                           | Downregulated |
| A_33_P321 | 0.001692 | 0.000223  | -2.66 | RNASEH2B      | ribonuclease H2, subunit B                                             | Downregulated |
| A_23_P354 | 0.002909 | 0.000541  | -2.66 | MYOF          | myoferlin                                                              | Downregulated |
| A_33_P331 | 0.006257 | 0.00168   | -2.66 | FOXK2         | forkhead box K2                                                        | Downregulated |
| A_23_P119 | 0.013974 | 0.00492   | -2.66 | GUCA2A        | guanylate cyclase activator 2A (guanylin)                              | Downregulated |
| A_33_P337 | 0.000526 | 0.0000119 | -2.67 | CYBA          | cytochrome b-245, alpha polypeptide                                    | Downregulated |
| A_24_P273 | 0.00056  | 0.0000163 | -2.67 | MED20         | mediator complex subunit 20                                            | Downregulated |
| A_33_P330 | 0.000578 | 0.000019  | -2.67 | COL19A1       | collagen, type XIX, alpha 1                                            | Downregulated |
| A_33_P340 | 0.000906 | 0.0000624 | -2.67 | PECAM1        | platelet/endothelial cell adhesion molecule 1                          | Downregulated |
| A_23_P121 | 0.000925 | 0.0000653 | -2.67 | PARP8         | poly (ADP-ribose) polymerase family, member 8                          | Downregulated |
| A_23_P141 | 0.001103 | 0.0000999 | -2.67 | TPGS2         | tubulin polyglutamylase complex subunit 2                              | Downregulated |
| A_21_P001 | 0.001603 | 0.000202  | -2.67 | CD99P1        | CD99 molecule pseudogene 1                                             | Downregulated |
| A_33_P328 | 0.002153 | 0.000342  | -2.67 | CTSB          | cathepsin B                                                            | Downregulated |
| A_21_P000 | 0.003674 | 0.000771  | -2.67 | SNORD54       | small nucleolar RNA, C/D box 54                                        | Downregulated |
| A_23_P554 | 0.00478  | 0.00114   | -2.67 | CBX8          | chromobox homolog 8                                                    | Downregulated |
| A_24_P348 | 0.000711 | 0.0000357 | -2.68 | TTY15         | testis-specific transcript, Y-linked 15 (non-protein coding)           | Downregulated |
| A_32_P110 | 0.000831 | 0.000052  | -2.68 | GGACT         | gamma-glutamylamine cyclotransferase                                   | Downregulated |
| A_33_P326 | 0.001563 | 0.000194  | -2.68 | IVD           | isovaleryl-CoA dehydrogenase                                           | Downregulated |
| A_33_P331 | 0.003893 | 0.000841  | -2.68 | LINC01184     | long intergenic non-protein coding RNA 1184                            | Downregulated |
| A_21_P000 | 0.009843 | 0.00313   | -2.68 | lnc-C1orf124- | lnc-C1orf124-1:1                                                       | Downregulated |
| A_33_P325 | 0.000525 | 0.0000111 | -2.69 | BCL2L11       | BCL2-like 11 (apoptosis facilitator)                                   | Downregulated |
| A_32_P298 | 0.000532 | 0.0000132 | -2.69 | CRADD         | CASP2 and RIPK1 domain containing adaptor with death domain            | Downregulated |
| A_23_P611 | 0.000597 | 0.0000213 | -2.69 | APOO          | apolipoprotein O                                                       | Downregulated |
| A_23_P128 | 0.000773 | 0.0000434 | -2.69 | GZMH          | granzyme H (cathepsin G-like 2, protein h-CCPX)                        | Downregulated |
| A_24_P383 | 0.00093  | 0.0000661 | -2.69 | DPYSL2        | dihydropyrimidinase-like 2                                             | Downregulated |
| A_23_P611 | 0.002627 | 0.000464  | -2.69 | PLCXD1        | phosphatidylinositol-specific phospholipase C, X domain containing 1   | Downregulated |
| A_33_P338 | 0.000709 | 0.0000351 | -2.7  | TBPL1         | TBP-like 1                                                             | Downregulated |



|           |          |           |       |                |                                                                                |               |
|-----------|----------|-----------|-------|----------------|--------------------------------------------------------------------------------|---------------|
| A_23_P610 | 0.001427 | 0.000164  | -2.7  | MLKL           | mixed lineage kinase domain-like                                               | Downregulated |
| A_33_P339 | 0.001445 | 0.000168  | -2.7  | PARP10         | poly (ADP-ribose) polymerase family, member 10                                 | Downregulated |
| A_24_P544 | 0.001537 | 0.000188  | -2.7  | CCDC115        | coiled-coil domain containing 115                                              | Downregulated |
| A_23_P949 | 0.001695 | 0.000224  | -2.7  | ZNF283         | zinc finger protein 283                                                        | Downregulated |
| A_23_P193 | 0.00248  | 0.000424  | -2.7  | CUL7           | cullin 7                                                                       | Downregulated |
| A_24_P152 | 0.003568 | 0.00074   | -2.7  | C10orf76       | chromosome 10 open reading frame 76                                            | Downregulated |
| A_22_P000 | 0.00056  | 0.0000162 | -2.71 | lnc-RWDD2B-    | lnc-RWDD2B-1:1                                                                 | Downregulated |
| A_24_P354 | 0.000759 | 0.0000415 | -2.71 | MTMR12         | myotubularin related protein 12                                                | Downregulated |
| A_23_P329 | 0.000603 | 0.0000224 | -2.72 | VPS4A          | vacuolar protein sorting 4 homolog A ( <i>S. cerevisiae</i> )                  | Downregulated |
| A_22_P000 | 0.000766 | 0.0000427 | -2.72 | lnc-ZNF8-1     | lnc-ZNF8-1:1                                                                   | Downregulated |
| A_22_P000 | 0.000776 | 0.0000438 | -2.72 | lnc-CDIPT-1    | lnc-CDIPT-1:7                                                                  | Downregulated |
| A_23_P682 | 0.000995 | 0.000079  | -2.72 | GPR75          | G protein-coupled receptor 75                                                  | Downregulated |
| A_21_P000 | 0.001804 | 0.000249  | -2.72 | lnc-NDFIP2-8   | lnc-NDFIP2-8:1                                                                 | Downregulated |
| A_23_P216 | 0.000525 | 0.0000115 | -2.73 | ENTPD4         | ectonucleoside triphosphate diphosphohydrolase 4                               | Downregulated |
| A_24_P709 | 0.000526 | 0.0000128 | -2.73 | CD99           | CD99 molecule                                                                  | Downregulated |
| A_24_P912 | 0.000695 | 0.0000317 | -2.73 | AKNA           | AT-hook transcription factor                                                   | Downregulated |
| A_23_P203 | 0.000925 | 0.0000653 | -2.73 | INTS4          | integrator complex subunit 4                                                   | Downregulated |
| A_32_P584 | 0.000961 | 0.0000721 | -2.73 | KCND3          | potassium channel, voltage gated Shal related subfamily D, member 3            | Downregulated |
| A_33_P333 | 0.001203 | 0.000119  | -2.73 | FBRS           | fibrosin                                                                       | Downregulated |
| A_23_P152 | 0.002456 | 0.000416  | -2.73 | RSAD1          | radical S-adenosyl methionine domain containing 1                              | Downregulated |
| A_33_P331 | 0.004645 | 0.00109   | -2.73 | ZNF749         | zinc finger protein 749                                                        | Downregulated |
| A_24_P380 | 0.000589 | 0.0000204 | -2.74 | PANK3          | pantothenate kinase 3                                                          | Downregulated |
| A_33_P327 | 0.000621 | 0.0000242 | -2.74 | UHRF2          | ubiquitin-like with PHD and ring finger domains 2, E3 ubiquitin protein ligase | Downregulated |
| A_24_P398 | 0.001062 | 0.0000913 | -2.74 | IFT43          | intraflagellar transport 43                                                    | Downregulated |
| A_24_P244 | 0.001569 | 0.000195  | -2.74 | NUDT15         | nudix (nucleoside diphosphate linked moiety X)-type motif 15                   | Downregulated |
| A_23_P208 | 0.001569 | 0.000195  | -2.74 | SIRT6          | sirtuin 6                                                                      | Downregulated |
| A_23_P492 | 0.001919 | 0.000278  | -2.74 | C19orf68       | chromosome 19 open reading frame 68                                            | Downregulated |
| A_24_P942 | 0.00069  | 0.0000304 | -2.75 | FRMD4A         | FERM domain containing 4A                                                      | Downregulated |
| A_23_P252 | 0.000769 | 0.000043  | -2.75 | STRBP          | spermatid perinuclear RNA binding protein                                      | Downregulated |
| A_24_P132 | 0.000783 | 0.0000449 | -2.75 | GIMAP8         | GTPase, IMAP family member 8                                                   | Downregulated |
| A_33_P323 | 0.0017   | 0.000226  | -2.75 | MYO18A         | myosin XVIIIa                                                                  | Downregulated |
| A_21_P001 | 0.002117 | 0.000332  | -2.75 | XLOC_l2_009804 |                                                                                | Downregulated |
| A_23_P255 | 0.000525 | 0.0000112 | -2.76 | MANEA          | mannosidase, endo-alpha                                                        | Downregulated |
| A_21_P001 | 0.001581 | 0.000197  | -2.76 | PACRGL         | PARK2 co-regulated-like                                                        | Downregulated |
| A_24_P272 | 0.003909 | 0.000845  | -2.76 | MUSTN1         | musculoskeletal, embryonic nuclear protein 1                                   | Downregulated |
| A_24_P371 | 0.006209 | 0.00166   | -2.76 | FAM208A        | family with sequence similarity 208, member A                                  | Downregulated |
| A_23_P413 | 0.006309 | 0.0017    | -2.76 | MDM1           | Mdm1 nuclear protein homolog (mouse)                                           | Downregulated |

|           |          |           |       |                |                                                                |               |
|-----------|----------|-----------|-------|----------------|----------------------------------------------------------------|---------------|
| A_23_P114 | 0.011083 | 0.00365   | -2.76 | MBTPS2         | membrane-bound transcription factor peptidase, site 2          | Downregulated |
| A_24_P946 | 0.000792 | 0.0000462 | -2.77 | ARIH2          | ariadne RBR E3 ubiquitin protein ligase 2                      | Downregulated |
| A_23_P157 | 0.000914 | 0.0000639 | -2.77 | DNAJC30        | DnaJ (Hsp40) homolog, subfamily C, member 30                   | Downregulated |
| A_23_P205 | 0.00109  | 0.0000969 | -2.77 | UTP14A         | UTP14, U3 small nucleolar ribonucleoprotein, homolog A (yeast) | Downregulated |
| A_23_P882 | 0.001211 | 0.000121  | -2.77 | RBM23          | RNA binding motif protein 23                                   | Downregulated |
| A_33_P323 | 0.004387 | 0.001     | -2.77 | RIMS3          | regulating synaptic membrane exocytosis 3                      | Downregulated |
| A_21_P000 | 0.000647 | 0.0000267 | -2.78 | C5orf56        | chromosome 5 open reading frame 56                             | Downregulated |
| A_22_P000 | 0.000728 | 0.0000381 | -2.78 | LOC1019278     | uncharacterized LOC101927841                                   | Downregulated |
| A_33_P344 | 0.000728 | 0.0000381 | -2.78 | LOC286071      | uncharacterized LOC286071                                      | Downregulated |
| A_33_P324 | 0.002117 | 0.000333  | -2.78 | DCAF8          | DDB1 and CUL4 associated factor 8                              | Downregulated |
| A_23_P400 | 0.004131 | 0.000914  | -2.78 | AMMECR1L       | AMMECR1-like                                                   | Downregulated |
| A_33_P328 | 0.004483 | 0.00104   | -2.78 | GCNT7          | glucosaminyl (N-acetyl) transferase family member 7            | Downregulated |
| A_23_P141 | 0.006046 | 0.0016    | -2.78 | BCAS3          | breast carcinoma amplified sequence 3                          | Downregulated |
| A_21_P000 | 0.000855 | 0.0000554 | -2.79 | lnc-SLC1A4-1   | lnc-SLC1A4-1:1                                                 | Downregulated |
| A_23_P157 | 0.00108  | 0.000095  | -2.79 | KRT9           | keratin 9, type I                                              | Downregulated |
| A_21_P000 | 0.0011   | 0.0000994 | -2.79 | lnc-C15orf2-9  | lnc-C15orf2-9:10                                               | Downregulated |
| A_23_P100 | 0.001277 | 0.000134  | -2.79 | MYO19          | myosin XIX                                                     | Downregulated |
| A_33_P323 | 0.001433 | 0.000165  | -2.79 | ZNF3           | zinc finger protein 3                                          | Downregulated |
| A_24_P932 | 0.001435 | 0.000166  | -2.79 | TMEM14E        | transmembrane protein 14E                                      | Downregulated |
| A_21_P001 | 0.003544 | 0.000732  | -2.79 | XLOC_I2_004595 |                                                                | Downregulated |
| A_23_P386 | 0.016097 | 0.00593   | -2.79 | DIRAS1         | DIRAS family, GTP-binding RAS-like 1                           | Downregulated |
| A_21_P001 | 0.000537 | 0.000014  | -2.8  | lnc-AF165138   | lnc-AF165138.7.1-3:2                                           | Downregulated |
| A_23_P153 | 0.000717 | 0.0000365 | -2.8  | ACVR2A         | activin A receptor, type IIA                                   | Downregulated |
| A_33_P332 | 0.000893 | 0.0000604 | -2.8  | ZNF19          | zinc finger protein 19                                         | Downregulated |
| A_33_P324 | 0.001341 | 0.000146  | -2.8  | AFF1           | AF4/FMR2 family, member 1                                      | Downregulated |
| A_21_P000 | 0.001353 | 0.000149  | -2.8  | LOC1005057     | uncharacterized LOC100505771                                   | Downregulated |
| A_22_P000 | 0.001699 | 0.000226  | -2.8  | PRKXP1         | protein kinase, X-linked, pseudogene 1                         | Downregulated |
| A_22_P000 | 0.002221 | 0.000359  | -2.8  | IGFBP7         | insulin-like growth factor binding protein 7                   | Downregulated |
| A_23_P155 | 0.002219 | 0.000359  | -2.8  | NEK11          | NIMA-related kinase 11                                         | Downregulated |
| A_22_P000 | 0.002409 | 0.000405  | -2.8  | lnc-ZBTB38-1   | lnc-ZBTB38-1:1                                                 | Downregulated |
| A_23_P113 | 0.000526 | 0.0000127 | -2.81 | USP19          | ubiquitin specific peptidase 19                                | Downregulated |
| A_23_P415 | 0.000537 | 0.0000142 | -2.81 | METTL7A        | methyltransferase like 7A                                      | Downregulated |
| A_21_P001 | 0.000545 | 0.0000147 | -2.81 | XLOC_I2_006026 |                                                                | Downregulated |
| A_33_P341 | 0.000717 | 0.0000365 | -2.81 | DDX58          | DEAD (Asp-Glu-Ala-Asp) box polypeptide 58                      | Downregulated |
| A_23_P383 | 0.001324 | 0.000143  | -2.81 | ZSWIM5         | zinc finger, SWIM-type containing 5                            | Downregulated |
| A_23_P134 | 0.002302 | 0.000379  | -2.81 | THAP1          | THAP domain containing, apoptosis associated protein 1         | Downregulated |
| A_24_P279 | 0.007565 | 0.00219   | -2.81 | MRI1           | methylthioribose-1-phosphate isomerase 1                       | Downregulated |

|           |          |           |       |                |                                                           |               |
|-----------|----------|-----------|-------|----------------|-----------------------------------------------------------|---------------|
| A_22_P000 | 0.016069 | 0.00591   | -2.81 | lnc-PGBD5-1    | lnc-PGBD5-1:1                                             | Downregulated |
| A_23_P131 | 0.001612 | 0.000205  | -2.82 | EXT2           | exostosin glycosyltransferase 2                           | Downregulated |
| A_33_P342 | 0.002832 | 0.000519  | -2.82 | WDPCP          | WD repeat containing planar cell polarity effector        | Downregulated |
| A_23_P706 | 0.000525 | 0.0000113 | -2.83 | LY86           | lymphocyte antigen 86                                     | Downregulated |
| A_22_P000 | 0.000612 | 0.0000234 | -2.83 | FLJ32255       | uncharacterized LOC643977                                 | Downregulated |
| A_22_P000 | 0.00071  | 0.0000353 | -2.83 | lnc-C10orf31-  | lnc-C10orf31-2:1                                          | Downregulated |
| A_22_P000 | 0.000896 | 0.0000607 | -2.83 | lnc-CD63-1     | lnc-CD63-1:1                                              | Downregulated |
| A_23_P320 | 0.001266 | 0.000133  | -2.83 | CEP128         | centrosomal protein 128kDa                                | Downregulated |
| A_21_P000 | 0.00281  | 0.000513  | -2.83 | lnc-SMARCAL    | lnc-SMARCAL1-2:5                                          | Downregulated |
| A_22_P000 | 0.004513 | 0.00105   | -2.83 | LOC1005068     | uncharacterized LOC100506844                              | Downregulated |
| A_21_P000 | 0.006568 | 0.0018    | -2.83 | lnc-GCNT1-2    | lnc-GCNT1-2:1                                             | Downregulated |
| A_23_P380 | 0.000577 | 0.0000183 | -2.84 | ANKRD13B       | ankyrin repeat domain 13B                                 | Downregulated |
| A_21_P000 | 0.000642 | 0.0000262 | -2.84 | SNORD100       | small nucleolar RNA, C/D box 100                          | Downregulated |
| A_33_P330 | 0.001797 | 0.000248  | -2.84 | DBT            | dihydrolipoamide branched chain transacylase E2           | Downregulated |
| A_33_P325 | 0.002585 | 0.000453  | -2.84 | PLCB1          | phospholipase C, beta 1 (phosphoinositide-specific)       | Downregulated |
| A_21_P001 | 0.003024 | 0.000575  | -2.84 | XLOC_I2_015441 |                                                           | Downregulated |
| A_23_P771 | 0.000709 | 0.0000349 | -2.85 | DPH6           | diphthamine biosynthesis 6                                | Downregulated |
| A_24_P751 | 0.000894 | 0.0000605 | -2.85 | HBD            | hemoglobin, delta                                         | Downregulated |
| A_33_P338 | 0.001397 | 0.000157  | -2.85 | DUSP28         | dual specificity phosphatase 28                           | Downregulated |
| A_23_P317 | 0.001443 | 0.000168  | -2.85 | E2F5           | E2F transcription factor 5, p130-binding                  | Downregulated |
| A_22_P000 | 0.002356 | 0.000392  | -2.85 | lnc-CCDC7-3    | lnc-CCDC7-3:1                                             | Downregulated |
| A_22_P000 | 0.004251 | 0.000957  | -2.85 | lnc-CDC25C-1   | lnc-CDC25C-1:1                                            | Downregulated |
| A_24_P330 | 0.004632 | 0.00109   | -2.85 | CALCOCO2       | calcium binding and coiled-coil domain 2                  | Downregulated |
| A_33_P328 | 0.000515 | 9.85E-06  | -2.86 | NUP133         | nucleoporin 133kDa                                        | Downregulated |
| A_22_P000 | 0.000526 | 0.0000126 | -2.86 | lnc-EIF2AK4-   | lnc-EIF2AK4-3:1                                           | Downregulated |
| A_23_P139 | 0.000577 | 0.000018  | -2.86 | GOLGA2P5       | golgin A2 pseudogene 5                                    | Downregulated |
| A_23_P400 | 0.000715 | 0.0000362 | -2.86 | PMS1           | PMS1 postmeiotic segregation increased 1 (S. cerevisiae)  | Downregulated |
| A_33_P333 | 0.001158 | 0.000111  | -2.86 | SHROOM3        | shroom family member 3                                    | Downregulated |
| A_24_P314 | 0.001365 | 0.000151  | -2.86 | SPC24          | SPC24, NDC80 kinetochore complex component                | Downregulated |
| A_22_P000 | 0.005238 | 0.0013    | -2.86 | lnc-ST7L-1     | lnc-ST7L-1:1                                              | Downregulated |
| A_21_P000 | 0.005271 | 0.00131   | -2.86 | MAPKAPK5-      | MAPKAPK5 antisense RNA 1                                  | Downregulated |
| A_24_P108 | 0.005534 | 0.00141   | -2.86 | GOSR2          | golgi SNAP receptor complex member 2                      | Downregulated |
| A_23_P949 | 0.007026 | 0.00198   | -2.86 | LETM1          | leucine zipper-EF-hand containing transmembrane protein 1 | Downregulated |
| A_23_P251 | 0.000526 | 0.0000127 | -2.87 | DCTN4          | dynactin 4 (p62)                                          | Downregulated |
| A_33_P328 | 0.000545 | 0.0000147 | -2.87 | KAT6B          | K(lysine) acetyltransferase 6B                            | Downregulated |
| A_23_P361 | 0.000707 | 0.0000341 | -2.87 | SESN3          | sestrin 3                                                 | Downregulated |
| A_24_P370 | 0.00124  | 0.000127  | -2.87 | WBSCR16        | Williams-Beuren syndrome chromosome region 16             | Downregulated |

|           |          |           |       |             |                                                                    |               |
|-----------|----------|-----------|-------|-------------|--------------------------------------------------------------------|---------------|
| A_23_P911 | 0.003389 | 0.000685  | -2.87 | PECR        | peroxisomal trans-2-enoyl-CoA reductase                            | Downregulated |
| A_33_P326 | 0.008796 | 0.00269   | -2.87 | TUBE1       | tubulin, epsilon 1                                                 | Downregulated |
| A_23_P107 | 0.000543 | 0.0000146 | -2.88 | ETFB        | electron-transfer-flavoprotein, beta polypeptide                   | Downregulated |
| A_22_P000 | 0.000776 | 0.0000438 | -2.88 | ZNF154      | zinc finger protein 154                                            | Downregulated |
| A_33_P325 | 0.001279 | 0.000135  | -2.88 | SETDB1      | SET domain, bifurcated 1                                           | Downregulated |
| A_33_P328 | 0.001522 | 0.000185  | -2.88 | CDK11A      | cyclin-dependent kinase 11A                                        | Downregulated |
| A_19_P008 | 0.001893 | 0.000272  | -2.88 | RNF213      | ring finger protein 213                                            | Downregulated |
| A_33_P321 | 0.002927 | 0.000545  | -2.88 | TTBK2       | tau tubulin kinase 2                                               | Downregulated |
| A_23_P166 | 0.003699 | 0.000779  | -2.88 | ITGB5       | integrin, beta 5                                                   | Downregulated |
| A_19_P003 | 0.005192 | 0.00128   | -2.88 | HCG18       | HLA complex group 18 (non-protein coding)                          | Downregulated |
| A_24_P392 | 0.006904 | 0.00193   | -2.88 | SIMC1       | SUMO-interacting motifs containing 1                               | Downregulated |
| A_33_P682 | 0.000701 | 0.0000325 | -2.89 | LOC1005068  | uncharacterized LOC100506844                                       | Downregulated |
| A_33_P331 | 0.001443 | 0.000168  | -2.89 | CYB5R4      | cytochrome b5 reductase 4                                          | Downregulated |
| A_23_P416 | 0.001453 | 0.00017   | -2.89 | LRRC70      | leucine rich repeat containing 70                                  | Downregulated |
| A_23_P167 | 0.001511 | 0.000183  | -2.89 | FAM134B     | family with sequence similarity 134, member B                      | Downregulated |
| A_22_P000 | 0.003171 | 0.000621  | -2.89 | lnc-FDXACB1 | lnc-FDXACB1-1:1                                                    | Downregulated |
| A_23_P127 | 0.000603 | 0.0000224 | -2.9  | STK33       | serine/threonine kinase 33                                         | Downregulated |
| A_33_P336 | 0.000639 | 0.0000258 | -2.9  | MICA        | MHC class I polypeptide-related sequence A                         | Downregulated |
| A_23_P117 | 0.0008   | 0.0000475 | -2.9  | ZFAND4      | zinc finger, AN1-type domain 4                                     | Downregulated |
| A_33_P324 | 0.001802 | 0.000249  | -2.9  | SMIM5       | small integral membrane protein 5                                  | Downregulated |
| A_33_P333 | 0.001959 | 0.00029   | -2.9  | SYNE1       | spectrin repeat containing, nuclear envelope 1                     | Downregulated |
| A_33_P323 | 0.00542  | 0.00137   | -2.9  | FLJ16734    | uncharacterized LOC641928                                          | Downregulated |
| A_23_P553 | 0.000521 | 0.0000103 | -2.91 | FLOT2       | flotillin 2                                                        | Downregulated |
| A_32_P191 | 0.001343 | 0.000147  | -2.91 | KCTD5       | potassium channel tetramerization domain containing 5              | Downregulated |
| A_23_P566 | 0.002279 | 0.000374  | -2.91 | MCEE        | methylmalonyl CoA epimerase                                        | Downregulated |
| A_22_P000 | 0.000515 | 9.18E-06  | -2.92 | lnc-SDCCAG8 | lnc-SDCCAG8-1:1                                                    | Downregulated |
| A_23_P951 | 0.00056  | 0.0000164 | -2.92 | SEMA4B      | sema domain, immunoglobulin domain (Ig), transmembrane domain (TM) | Downregulated |
| A_32_P196 | 0.000837 | 0.0000527 | -2.92 | DPY19L4     | dpy-19-like 4 (C. elegans)                                         | Downregulated |
| A_23_P211 | 0.000837 | 0.0000527 | -2.92 | ZNF35       | zinc finger protein 35                                             | Downregulated |
| A_33_P336 | 0.001043 | 0.0000875 | -2.92 | UGGT1       | UDP-glucose glycoprotein glucosyltransferase 1                     | Downregulated |
| A_33_P336 | 0.001054 | 0.0000893 | -2.92 | TRPS1       | trichorhinophalangeal syndrome I                                   | Downregulated |
| A_33_P342 | 0.001524 | 0.000185  | -2.92 | ARPC5       | actin related protein 2/3 complex, subunit 5, 16kDa                | Downregulated |
| A_33_P340 | 0.002221 | 0.000359  | -2.92 | LOC283788   | FSHD region gene 1 pseudogene                                      | Downregulated |
| A_21_P001 | 0.006241 | 0.00168   | -2.92 | LOC1005070  | uncharacterized LOC100507006                                       | Downregulated |
| A_23_P202 | 0.007422 | 0.00213   | -2.92 | SLC35C1     | solute carrier family 35 (GDP-fucose transporter), member C1       | Downregulated |
| A_33_P327 | 0.000502 | 8.36E-06  | -2.93 | REC8        | REC8 meiotic recombination protein                                 | Downregulated |
| A_22_P000 | 0.00058  | 0.0000196 | -2.93 | lnc-SNX11-2 | lnc-SNX11-2:1                                                      | Downregulated |

|           |          |           |       |                  |                                                                            |               |
|-----------|----------|-----------|-------|------------------|----------------------------------------------------------------------------|---------------|
| A_23_P917 | 0.00065  | 0.000027  | -2.93 | TNFRSF13C        | tumor necrosis factor receptor superfamily, member 13C                     | Downregulated |
| A_33_P375 | 0.002207 | 0.000355  | -2.93 | TOM1             | target of myb1 (chicken)                                                   | Downregulated |
| A_32_P539 | 0.000527 | 0.000013  | -2.94 | LINC01410        | long intergenic non-protein coding RNA 1410                                | Downregulated |
| A_22_P000 | 0.00062  | 0.0000239 | -2.94 | lnc-SRPR-1       | lnc-SRPR-1:1                                                               | Downregulated |
| A_23_P331 | 0.00069  | 0.0000304 | -2.94 | TTYH3            | tweety family member 3                                                     | Downregulated |
| A_21_P000 | 0.000995 | 0.0000785 | -2.94 | MCPH1            | microcephalin 1                                                            | Downregulated |
| A_23_P252 | 0.001203 | 0.000119  | -2.94 | EAF2             | ELL associated factor 2                                                    | Downregulated |
| A_23_P390 | 0.001815 | 0.000253  | -2.94 | PSKH1            | protein serine kinase H1                                                   | Downregulated |
| A_33_P342 | 0.003232 | 0.000639  | -2.94 | TRIM14           | tripartite motif containing 14                                             | Downregulated |
| A_23_P164 | 0.006105 | 0.00162   | -2.94 | FCER2            | Fc fragment of IgE, low affinity II, receptor for (CD23)                   | Downregulated |
| A_22_P000 | 0.006604 | 0.00182   | -2.94 | lnc-CHADL-2      | lnc-CHADL-2:1                                                              | Downregulated |
| A_22_P000 | 0.00774  | 0.00226   | -2.94 | lnc-DHX38-5      | lnc-DHX38-5:1                                                              | Downregulated |
| A_33_P325 | 0.000499 | 8.01E-06  | -2.95 | CNTRL            | centriolin                                                                 | Downregulated |
| A_33_P327 | 0.0005   | 8.07E-06  | -2.95 | METTL16          | methyltransferase like 16                                                  | Downregulated |
| A_32_P198 | 0.000713 | 0.000036  | -2.95 | SREK1IP1         | SREK1-interacting protein 1                                                | Downregulated |
| A_33_P323 | 0.000814 | 0.00005   | -2.95 | RNFT2            | ring finger protein, transmembrane 2                                       | Downregulated |
| A_23_P422 | 0.001493 | 0.000179  | -2.95 | ARHGAP20         | Rho GTPase activating protein 20                                           | Downregulated |
| A_23_P302 | 0.001662 | 0.000216  | -2.95 | PLK2             | polo-like kinase 2                                                         | Downregulated |
| A_23_P156 | 0.001997 | 0.0003    | -2.95 | ECI2             | enoyl-CoA delta isomerase 2                                                | Downregulated |
| A_21_P000 | 0.002376 | 0.000398  | -2.95 | LINC01419        | long intergenic non-protein coding RNA 1419                                | Downregulated |
| A_23_P132 | 0.00596  | 0.00157   | -2.95 | ZMAT5            | zinc finger, matrin-type 5                                                 | Downregulated |
| A_23_P142 | 0.007099 | 0.00201   | -2.95 | GNA11            | guanine nucleotide binding protein (G protein), alpha 11 (Gq class)        | Downregulated |
| A_21_P001 | 0.00995  | 0.00317   | -2.95 | XLOC_l2_009184   |                                                                            | Downregulated |
| A_22_P000 | 0.017144 | 0.00643   | -2.95 | lnc-HLA-DQA1-5:1 | lnc-HLA-DQA1-5:1                                                           | Downregulated |
| A_33_P340 | 0.000578 | 0.0000193 | -2.96 | UQCC3            | ubiquinol-cytochrome c reductase complex assembly factor 3                 | Downregulated |
| A_33_P321 | 0.001478 | 0.000176  | -2.96 | ZCCHC6           | zinc finger, CCHC domain containing 6                                      | Downregulated |
| A_23_P254 | 0.001501 | 0.000181  | -2.96 | C12orf4          | chromosome 12 open reading frame 4                                         | Downregulated |
| A_33_P340 | 0.001626 | 0.000207  | -2.96 | SEC14L1P1        | SEC14-like 1 pseudogene 1                                                  | Downregulated |
| A_23_P103 | 0.00255  | 0.000443  | -2.96 | B4GALT3          | UDP-Gal:betaGlcNAc beta 1,4- galactosyltransferase, polypeptide 3          | Downregulated |
| A_33_P336 | 0.000498 | 0.0000077 | -2.97 | RTN3             | reticulon 3                                                                | Downregulated |
| A_23_P215 | 0.000513 | 8.94E-06  | -2.97 | BAZ1B            | bromodomain adjacent to zinc finger domain, 1B                             | Downregulated |
| A_33_P322 | 0.000614 | 0.0000235 | -2.97 | COL4A4           | collagen, type IV, alpha 4                                                 | Downregulated |
| A_23_P233 | 0.000857 | 0.0000558 | -2.97 | MLLT11           | myeloid/lymphoid or mixed-lineage leukemia (trithorax homolog, Drosophila) | Downregulated |
| A_22_P000 | 0.001055 | 0.0000897 | -2.97 | GSN              | gelsolin                                                                   | Downregulated |
| A_24_P406 | 0.001369 | 0.000151  | -2.97 | MLLT10           | myeloid/lymphoid or mixed-lineage leukemia (trithorax homolog, Drosophila) | Downregulated |
| A_22_P000 | 0.00166  | 0.000216  | -2.97 | LOC340512        | uncharacterized LOC340512                                                  | Downregulated |
| A_23_P398 | 0.001763 | 0.00024   | -2.97 | HIP1R            | huntingtin interacting protein 1 related                                   | Downregulated |

|           |          |           |       |              |                                                                             |               |
|-----------|----------|-----------|-------|--------------|-----------------------------------------------------------------------------|---------------|
| A_24_P586 | 0.006035 | 0.0016    | -2.97 | GRAMD1B      | GRAM domain containing 1B                                                   | Downregulated |
| A_23_P692 | 0.000532 | 0.0000134 | -2.98 | SUMF1        | sulfatase modifying factor 1                                                | Downregulated |
| A_23_P838 | 0.000658 | 0.0000276 | -2.98 | CA8          | carbonic anhydrase VIII                                                     | Downregulated |
| A_24_P571 | 0.001824 | 0.000256  | -2.98 | PROSER3      | proline and serine rich 3                                                   | Downregulated |
| A_24_P365 | 0.0027   | 0.000483  | -2.98 | NKAPP1       | NFKB activating protein pseudogene 1                                        | Downregulated |
| A_23_P100 | 0.007415 | 0.00213   | -2.98 | ZCCHC14      | zinc finger, CCHC domain containing 14                                      | Downregulated |
| A_22_P000 | 0.008429 | 0.00254   | -2.98 | lnc-ATP4B-1  | lnc-ATP4B-1:1                                                               | Downregulated |
| A_33_P331 | 0.000577 | 0.0000185 | -2.99 | MTERF4       | mitochondrial transcription termination factor 4                            | Downregulated |
| A_24_P111 | 0.000693 | 0.0000308 | -2.99 | FAM172A      | family with sequence similarity 172, member A                               | Downregulated |
| A_23_P754 | 0.000736 | 0.0000387 | -2.99 | MEN1         | multiple endocrine neoplasia I                                              | Downregulated |
| A_21_P000 | 0.00075  | 0.0000405 | -2.99 | SNORD75      | small nucleolar RNA, C/D box 75                                             | Downregulated |
| A_24_P320 | 0.000869 | 0.0000576 | -2.99 | PRKRIP1      | PRKR interacting protein 1 (IL11 inducible)                                 | Downregulated |
| A_33_P327 | 0.002757 | 0.000499  | -2.99 | HLA-DPB1     | major histocompatibility complex, class II, DP beta 1                       | Downregulated |
| A_23_P446 | 0.00411  | 0.000907  | -2.99 | ADAMTS12     | ADAM metalloproteinase with thrombospondin type 1 motif, 12                 | Downregulated |
| A_24_P364 | 0.004211 | 0.000943  | -2.99 | NDUFC2       | NADH dehydrogenase (ubiquinone) 1, subcomplex unknown, 2, 14.5kD            | Downregulated |
| A_24_P344 | 0.000584 | 0.0000199 | -3    | RNF167       | ring finger protein 167                                                     | Downregulated |
| A_22_P000 | 0.000683 | 0.0000299 | -3    | lnc-KLHL25-3 | lnc-KLHL25-3:1                                                              | Downregulated |
| A_23_P148 | 0.00383  | 0.00082   | -3    | ADI1         | acireductone dioxygenase 1                                                  | Downregulated |
| A_23_P207 | 0.000711 | 0.0000356 | -3.01 | RAD51C       | RAD51 paralog C                                                             | Downregulated |
| A_23_P100 | 0.00124  | 0.000127  | -3.01 | ORC6         | origin recognition complex, subunit 6                                       | Downregulated |
| A_22_P000 | 0.001291 | 0.000137  | -3.01 | LRRC8B       | leucine rich repeat containing 8 family, member B                           | Downregulated |
| A_23_P390 | 0.001314 | 0.000141  | -3.01 | ZNF630       | zinc finger protein 630                                                     | Downregulated |
| A_21_P000 | 0.001991 | 0.000298  | -3.01 | SARS         | seryl-tRNA synthetase                                                       | Downregulated |
| A_33_P341 | 0.00362  | 0.000756  | -3.01 | LINC00886    | long intergenic non-protein coding RNA 886                                  | Downregulated |
| A_33_P334 | 0.004325 | 0.000983  | -3.01 | RABL2A       | RAB, member of RAS oncogene family-like 2A                                  | Downregulated |
| A_33_P332 | 0.005877 | 0.00154   | -3.01 | SBF1         | SET binding factor 1                                                        | Downregulated |
| A_24_P252 | 0.000498 | 7.85E-06  | -3.02 | TRIB1        | tribbles pseudokinase 1                                                     | Downregulated |
| A_33_P357 | 0.000504 | 8.58E-06  | -3.02 | AP3D1        | adaptor-related protein complex 3, delta 1 subunit                          | Downregulated |
| A_33_P341 | 0.000964 | 0.000073  | -3.02 | PURA         | purine-rich element binding protein A                                       | Downregulated |
| A_23_P128 | 0.000516 | 0.00001   | -3.03 | CARS2        | cysteinyl-tRNA synthetase 2, mitochondrial (putative)                       | Downregulated |
| A_23_P502 | 0.000603 | 0.0000222 | -3.03 | CYB5R3       | cytochrome b5 reductase 3                                                   | Downregulated |
| A_33_P328 | 0.00125  | 0.000129  | -3.03 | NSF          | N-ethylmaleimide-sensitive factor                                           | Downregulated |
| A_23_P852 | 0.002591 | 0.000454  | -3.03 | TMEM106B     | transmembrane protein 106B                                                  | Downregulated |
| A_23_P414 | 0.007089 | 0.00201   | -3.03 | TBC1D9       | TBC1 domain family, member 9 (with GRAM domain)                             | Downregulated |
| A_33_P326 | 0.000489 | 7.32E-06  | -3.04 | SLC25A23     | solute carrier family 25 (mitochondrial carrier; phosphate carrier), member | Downregulated |
| A_22_P000 | 0.000525 | 0.000011  | -3.04 | LOC1019289   | uncharacterized LOC101928954                                                | Downregulated |
| A_23_P446 | 0.000601 | 0.0000216 | -3.04 | ECT2         | epithelial cell transforming 2                                              | Downregulated |

|           |          |           |       |              |                                                                       |               |
|-----------|----------|-----------|-------|--------------|-----------------------------------------------------------------------|---------------|
| A_22_P000 | 0.001117 | 0.000103  | -3.04 | lnc-EFR3B-3  | lnc-EFR3B-3:1                                                         | Downregulated |
| A_33_P337 | 0.001134 | 0.000106  | -3.04 | RBM14        | RNA binding motif protein 14                                          | Downregulated |
| A_33_P321 | 0.001836 | 0.000258  | -3.04 | TRIQK        | triple QxxK/R motif containing                                        | Downregulated |
| A_21_P000 | 0.00275  | 0.000497  | -3.04 | RNF103       | ring finger protein 103                                               | Downregulated |
| A_33_P327 | 0.004032 | 0.000883  | -3.04 | GALM         | galactose mutarotase (aldose 1-epimerase)                             | Downregulated |
| A_33_P336 | 0.007627 | 0.00222   | -3.04 | EIF4ENIF1    | eukaryotic translation initiation factor 4E nuclear import factor 1   | Downregulated |
| A_33_P341 | 0.000526 | 0.0000125 | -3.05 | HNRNPU-AS1   | HNRNPU antisense RNA 1                                                | Downregulated |
| A_33_P333 | 0.000577 | 0.0000181 | -3.05 | HKDC1        | hexokinase domain containing 1                                        | Downregulated |
| A_23_P128 | 0.001115 | 0.000102  | -3.05 | FANCF        | Fanconi anemia, complementation group F                               | Downregulated |
| A_21_P000 | 0.001952 | 0.000287  | -3.05 | SNORD44      | small nucleolar RNA, C/D box 44                                       | Downregulated |
| A_33_P327 | 0.005428 | 0.00137   | -3.05 | CELF2-AS1    | CELF2 antisense RNA 1                                                 | Downregulated |
| A_24_P481 | 0.005933 | 0.00156   | -3.05 | LOC1001315   | uncharacterized LOC100131564                                          | Downregulated |
| A_22_P000 | 0.000504 | 8.56E-06  | -3.06 | lnc-CTU2-1   | lnc-CTU2-1:1                                                          | Downregulated |
| A_23_P217 | 0.000592 | 0.0000207 | -3.06 | DPM2         | dolichyl-phosphate mannosyltransferase polypeptide 2, regulatory subu | Downregulated |
| A_23_P144 | 0.000645 | 0.0000264 | -3.06 | SSUH2        | ssu-2 homolog (C. elegans)                                            | Downregulated |
| A_22_P000 | 0.000662 | 0.0000279 | -3.06 | lnc-FAM184B  | lnc-FAM184B-1:1                                                       | Downregulated |
| A_33_P327 | 0.000739 | 0.0000391 | -3.06 | NR1D2        | nuclear receptor subfamily 1, group D, member 2                       | Downregulated |
| A_23_P119 | 0.000802 | 0.000048  | -3.06 | CYTH2        | cytohesin 2                                                           | Downregulated |
| A_23_P150 | 0.001132 | 0.000105  | -3.06 | C2CD3        | C2 calcium-dependent domain containing 3                              | Downregulated |
| A_23_P215 | 0.001626 | 0.000208  | -3.06 | KIAA0408     | KIAA0408                                                              | Downregulated |
| A_23_P446 | 0.003709 | 0.000782  | -3.06 | ANAPC7       | anaphase promoting complex subunit 7                                  | Downregulated |
| A_33_P327 | 0.00056  | 0.0000157 | -3.07 | lnc-KLHL36-1 | lnc-KLHL36-1:1                                                        | Downregulated |
| A_24_P157 | 0.00067  | 0.0000288 | -3.07 | IL17RB       | interleukin 17 receptor B                                             | Downregulated |
| A_22_P000 | 0.000697 | 0.0000319 | -3.07 | SPAG5-AS1    | SPAG5 antisense RNA 1                                                 | Downregulated |
| A_23_P216 | 0.002078 | 0.000322  | -3.07 | EXOSC2       | exosome component 2                                                   | Downregulated |
| A_24_P185 | 0.002757 | 0.000499  | -3.07 | NDRG3        | NDRG family member 3                                                  | Downregulated |
| A_24_P331 | 0.003057 | 0.000585  | -3.07 | GUCD1        | guanylyl cyclase domain containing 1                                  | Downregulated |
| A_23_P890 | 0.000756 | 0.0000413 | -3.08 | CLUHP3       | clustered mitochondria (cluA/CLU1) homolog pseudogene 3               | Downregulated |
| A_33_P342 | 0.001042 | 0.000087  | -3.08 | MRPS34       | mitochondrial ribosomal protein S34                                   | Downregulated |
| A_23_P372 | 0.001066 | 0.0000922 | -3.08 | ITPKB        | inositol-trisphosphate 3-kinase B                                     | Downregulated |
| A_33_P329 | 0.001863 | 0.000265  | -3.08 | NAAA         | N-acylethanolamine acid amidase                                       | Downregulated |
| A_33_P334 | 0.002553 | 0.000444  | -3.08 | LOC1001304   | uncharacterized LOC100130458                                          | Downregulated |
| A_22_P000 | 0.004207 | 0.000942  | -3.08 | lnc-DBT-2    | lnc-DBT-2:1                                                           | Downregulated |
| A_21_P000 | 0.000718 | 0.0000367 | -3.09 | VTRNA1-1     | vault RNA 1-1                                                         | Downregulated |
| A_33_P338 | 0.00084  | 0.0000532 | -3.09 | AGO1         | argonaute RISC catalytic component 1                                  | Downregulated |
| A_23_P273 | 0.004588 | 0.00107   | -3.09 | TSHZ1        | teashirt zinc finger homeobox 1                                       | Downregulated |
| A_22_P000 | 0.005951 | 0.00156   | -3.09 | HDAC9        | histone deacetylase 9                                                 | Downregulated |

|           |          |           |       |                |                                                                        |               |
|-----------|----------|-----------|-------|----------------|------------------------------------------------------------------------|---------------|
| A_33_P321 | 0.006385 | 0.00173   | -3.09 | FECH           | ferrochelatase                                                         | Downregulated |
| A_23_P361 | 0.000502 | 8.47E-06  | -3.1  | METTL6         | methyltransferase like 6                                               | Downregulated |
| A_21_P001 | 0.000664 | 0.0000283 | -3.1  | lnc-PRR11-1    | lnc-PRR11-1:1                                                          | Downregulated |
| A_24_P361 | 0.000664 | 0.0000283 | -3.1  | ZNF839         | zinc finger protein 839                                                | Downregulated |
| A_24_P919 | 0.000701 | 0.0000327 | -3.1  | WDR17          | WD repeat domain 17                                                    | Downregulated |
| A_22_P000 | 0.000718 | 0.0000368 | -3.1  | LINC01585      | long intergenic non-protein coding RNA 1585                            | Downregulated |
| A_33_P341 | 0.00074  | 0.0000393 | -3.1  | DNAJA2         | DnaJ (Hsp40) homolog, subfamily A, member 2                            | Downregulated |
| A_24_P116 | 0.000839 | 0.0000532 | -3.1  | PSMD9          | proteasome (prosome, macropain) 26S subunit, non-ATPase, 9             | Downregulated |
| A_33_P341 | 0.001054 | 0.0000895 | -3.1  | SHROOM3        | shroom family member 3                                                 | Downregulated |
| A_33_P329 | 0.001187 | 0.000116  | -3.1  | CCDC125        | coiled-coil domain containing 125                                      | Downregulated |
| A_23_P391 | 0.000486 | 0.0000071 | -3.11 | RCAN3          | RCAN family member 3                                                   | Downregulated |
| A_24_P920 | 0.000559 | 0.0000155 | -3.11 | PPIA           | peptidylprolyl isomerase A (cyclophilin A)                             | Downregulated |
| A_23_P337 | 0.000717 | 0.0000365 | -3.11 | SERBP1         | SERPINE1 mRNA binding protein 1                                        | Downregulated |
| A_32_P100 | 0.000855 | 0.0000555 | -3.11 | MTURN          | maturin, neural progenitor differentiation regulator homolog (Xenopus) | Downregulated |
| A_21_P000 | 0.001175 | 0.000114  | -3.11 | LOC1005076     | uncharacterized LOC100507616                                           | Downregulated |
| A_21_P001 | 0.004458 | 0.00103   | -3.11 | LOC1002894     | uncharacterized LOC100289455                                           | Downregulated |
| A_24_P401 | 0.000701 | 0.0000327 | -3.12 | KIAA0556       | KIAA0556                                                               | Downregulated |
| A_23_P168 | 0.001036 | 0.000086  | -3.12 | TP53INP1       | tumor protein p53 inducible nuclear protein 1                          | Downregulated |
| A_21_P001 | 0.00166  | 0.000216  | -3.12 | FTO-IT1        | FTO intronic transcript 1 (non-protein coding)                         | Downregulated |
| A_22_P000 | 0.002696 | 0.000482  | -3.12 | lnc-NUMB-2     | lnc-NUMB-2:1                                                           | Downregulated |
| A_23_P112 | 0.004355 | 0.000994  | -3.12 | CNOT10         | CCR4-NOT transcription complex, subunit 10                             | Downregulated |
| A_33_P336 | 0.005953 | 0.00157   | -3.12 | RPS6           | ribosomal protein S6                                                   | Downregulated |
| A_21_P001 | 0.000501 | 8.17E-06  | -3.13 | XLOC_I2_003992 |                                                                        | Downregulated |
| A_22_P000 | 0.000765 | 0.0000426 | -3.13 | SLC7A11-AS     | SLC7A11 antisense RNA 1                                                | Downregulated |
| A_23_P934 | 0.001031 | 0.0000851 | -3.13 | BCKDHB         | branched chain keto acid dehydrogenase E1, beta polypeptide            | Downregulated |
| A_23_P969 | 0.001481 | 0.000177  | -3.13 | NVL            | nuclear VCP-like                                                       | Downregulated |
| A_33_P334 | 0.002498 | 0.000429  | -3.13 | NAIP           | NLR family, apoptosis inhibitory protein                               | Downregulated |
| A_21_P001 | 0.004031 | 0.000883  | -3.13 | XLOC_I2_011911 |                                                                        | Downregulated |
| A_33_P341 | 0.006535 | 0.00179   | -3.13 | HPS1           | Hermansky-Pudlak syndrome 1                                            | Downregulated |
| A_23_P593 | 0.002804 | 0.000511  | -3.14 | RSPH3          | radial spoke 3 homolog (Chlamydomonas)                                 | Downregulated |
| A_19_P003 | 0.005245 | 0.0013    | -3.14 | XLOC_I2_015760 |                                                                        | Downregulated |
| A_23_P367 | 0.000502 | 8.39E-06  | -3.15 | PCBD1          | pterin-4 alpha-carbinolamine dehydratase/dimerization cofactor of hepa | Downregulated |
| A_23_P963 | 0.000526 | 0.0000117 | -3.15 | PRAF2          | PRA1 domain family, member 2                                           | Downregulated |
| A_22_P000 | 0.000743 | 0.0000399 | -3.15 | PRR34-AS1      | PRR34 antisense RNA 1                                                  | Downregulated |
| A_33_P335 | 0.000896 | 0.0000607 | -3.15 | HMG20B         | high mobility group 20B                                                | Downregulated |
| A_23_P981 | 0.001085 | 0.0000959 | -3.15 | HRAS           | Harvey rat sarcoma viral oncogene homolog                              | Downregulated |
| A_23_P300 | 0.001213 | 0.000121  | -3.15 | LMBR1          | limb development membrane protein 1                                    | Downregulated |



|           |          |           |       |              |                                                         |               |
|-----------|----------|-----------|-------|--------------|---------------------------------------------------------|---------------|
| A_33_P322 | 0.001403 | 0.000159  | -3.15 | SNORA74B     | small nucleolar RNA, H/ACA box 74B                      | Downregulated |
| A_33_P332 | 0.001524 | 0.000185  | -3.15 | ZNF605       | zinc finger protein 605                                 | Downregulated |
| A_23_P250 | 0.000642 | 0.0000262 | -3.16 | ZDHHC14      | zinc finger, DHHC-type containing 14                    | Downregulated |
| A_24_P403 | 0.000752 | 0.0000408 | -3.16 | PHF20L1      | PHD finger protein 20-like 1                            | Downregulated |
| A_22_P000 | 0.000883 | 0.000059  | -3.16 | lnc-TSPAN5-2 | lnc-TSPAN5-2:2                                          | Downregulated |
| A_33_P335 | 0.005377 | 0.00135   | -3.16 | MTSS1        | metastasis suppressor 1                                 | Downregulated |
| A_23_P200 | 0.005531 | 0.00141   | -3.16 | PCNXL2       | pecanex-like 2 (Drosophila)                             | Downregulated |
| A_33_P336 | 0.000526 | 0.0000124 | -3.17 | CSGALNACT    | chondroitin sulfate N-acetylgalactosaminyltransferase 1 | Downregulated |
| A_33_P323 | 0.000665 | 0.0000283 | -3.17 | TRIM47       | tripartite motif containing 47                          | Downregulated |
| A_24_P277 | 0.000839 | 0.000053  | -3.17 | RAB43        | RAB43, member RAS oncogene family                       | Downregulated |
| A_33_P376 | 0.000846 | 0.0000538 | -3.17 | SIRT5        | sirtuin 5                                               | Downregulated |
| A_33_P321 | 0.000931 | 0.0000664 | -3.17 | RNF43        | ring finger protein 43                                  | Downregulated |
| A_23_P207 | 0.000977 | 0.0000753 | -3.17 | MAP3K14      | mitogen-activated protein kinase kinase kinase 14       | Downregulated |
| A_23_P156 | 0.002468 | 0.00042   | -3.17 | SOBP         | sine oculis binding protein homolog (Drosophila)        | Downregulated |
| A_23_P215 | 0.000525 | 0.0000115 | -3.18 | PODXL        | podocalyxin-like                                        | Downregulated |
| A_22_P000 | 0.000526 | 0.000012  | -3.18 | LOC1027246   | uncharacterized LOC102724601                            | Downregulated |
| A_23_P966 | 0.00056  | 0.000016  | -3.18 | PRPS2        | phosphoribosyl pyrophosphate synthetase 2               | Downregulated |
| A_23_P841 | 0.000563 | 0.0000168 | -3.18 | PITPNC1      | phosphatidylinositol transfer protein, cytoplasmic 1    | Downregulated |
| A_33_P327 | 0.001157 | 0.00011   | -3.18 | PHF20L1      | PHD finger protein 20-like 1                            | Downregulated |
| A_23_P129 | 0.001341 | 0.000146  | -3.18 | IDH2         | isocitrate dehydrogenase 2 (NADP+), mitochondrial       | Downregulated |
| A_23_P257 | 0.001576 | 0.000197  | -3.18 | CD180        | CD180 molecule                                          | Downregulated |
| A_23_P217 | 0.00766  | 0.00223   | -3.18 | SLC31A2      | solute carrier family 31 (copper transporter), member 2 | Downregulated |
| A_23_P132 | 0.000483 | 0.0000064 | -3.19 | SIK1         | salt-inducible kinase 1                                 | Downregulated |
| A_33_P336 | 0.000585 | 0.0000201 | -3.19 | ABCG8        | ATP-binding cassette, sub-family G (WHITE), member 8    | Downregulated |
| A_24_P253 | 0.000707 | 0.0000337 | -3.19 | FLOT2        | flotillin 2                                             | Downregulated |
| A_23_P479 | 0.001179 | 0.000115  | -3.19 | MED13L       | mediator complex subunit 13-like                        | Downregulated |
| A_23_P139 | 0.002054 | 0.000315  | -3.19 | TRIM44       | tripartite motif containing 44                          | Downregulated |
| A_23_P358 | 0.004639 | 0.00109   | -3.19 | GOLGA6L4     | golgin A6 family-like 4                                 | Downregulated |
| A_33_P339 | 0.000793 | 0.0000466 | -3.2  | LINC00494    | long intergenic non-protein coding RNA 494              | Downregulated |
| A_23_P168 | 0.000896 | 0.0000608 | -3.2  | CCDC126      | coiled-coil domain containing 126                       | Downregulated |
| A_23_P365 | 0.002874 | 0.000532  | -3.2  | MDN1         | MDN1, midasin homolog (yeast)                           | Downregulated |
| A_22_P000 | 0.005105 | 0.00125   | -3.2  | KIAA0040     | KIAA0040                                                | Downregulated |
| A_24_P229 | 0.001115 | 0.000102  | -3.21 | SMIM22       | small integral membrane protein 22                      | Downregulated |
| A_23_P443 | 0.001604 | 0.000202  | -3.21 | CASKIN2      | CASK interacting protein 2                              | Downregulated |
| A_22_P000 | 0.000701 | 0.0000326 | -3.22 | LUZP1        | leucine zipper protein 1                                | Downregulated |
| A_23_P898 | 0.000967 | 0.0000735 | -3.22 | TMEM241      | transmembrane protein 241                               | Downregulated |
| A_23_P335 | 0.001179 | 0.000115  | -3.22 | HIBADH       | 3-hydroxyisobutyrate dehydrogenase                      | Downregulated |

|           |          |           |       |                |                                                                    |               |
|-----------|----------|-----------|-------|----------------|--------------------------------------------------------------------|---------------|
| A_33_P324 | 0.001885 | 0.00027   | -3.22 | C17orf59       | chromosome 17 open reading frame 59                                | Downregulated |
| A_23_P550 | 0.000483 | 5.72E-06  | -3.23 | SLC38A10       | solute carrier family 38, member 10                                | Downregulated |
| A_24_P303 | 0.000483 | 6.04E-06  | -3.23 | BMI1           | BMI1 proto-oncogene, polycomb ring finger                          | Downregulated |
| A_22_P000 | 0.000501 | 8.13E-06  | -3.23 | lnc-TMEM30B    | lnc-TMEM30B-1:3                                                    | Downregulated |
| A_21_P001 | 0.000515 | 9.85E-06  | -3.23 | XLOC_I2_005179 |                                                                    | Downregulated |
| A_33_P323 | 0.000601 | 0.0000216 | -3.23 | ANG            | angiogenin, ribonuclease, RNase A family, 5                        | Downregulated |
| A_24_P168 | 0.000601 | 0.0000218 | -3.24 | GNAS           | GNAS complex locus                                                 | Downregulated |
| A_24_P109 | 0.000771 | 0.0000432 | -3.24 | NBEAL1         | neurobeachin-like 1                                                | Downregulated |
| A_23_P175 | 0.000863 | 0.0000566 | -3.24 | KIF16B         | kinesin family member 16B                                          | Downregulated |
| A_21_P000 | 0.004288 | 0.000969  | -3.24 | lnc-CBWD3-1    | lnc-CBWD3-1:1                                                      | Downregulated |
| A_22_P000 | 0.000486 | 6.98E-06  | -3.25 | lnc-SERAC1-2   | lnc-SERAC1-2:1                                                     | Downregulated |
| A_22_P000 | 0.000831 | 0.000052  | -3.25 | KCNQ5-AS1      | KCNQ5 antisense RNA 1                                              | Downregulated |
| A_22_P000 | 0.002459 | 0.000417  | -3.25 | PSMA3-AS1      | PSMA3 antisense RNA 1                                              | Downregulated |
| A_23_P636 | 0.000483 | 5.48E-06  | -3.26 | IDE            | insulin-degrading enzyme                                           | Downregulated |
| A_24_P398 | 0.000665 | 0.0000284 | -3.26 | UNC45A         | unc-45 homolog A (C. elegans)                                      | Downregulated |
| A_24_P443 | 0.004371 | 0.000999  | -3.26 | UGGT2          | UDP-glucose glycoprotein glucosyltransferase 2                     | Downregulated |
| A_23_P151 | 0.000525 | 0.0000113 | -3.27 | TCHP           | trichoplein, keratin filament binding                              | Downregulated |
| A_23_P156 | 0.000695 | 0.0000314 | -3.27 | ADTRP          | androgen-dependent TFPI-regulating protein                         | Downregulated |
| A_23_P523 | 0.000801 | 0.0000479 | -3.27 | NDST2          | N-deacetylase/N-sulfotransferase (heparan glucosaminy) 2           | Downregulated |
| A_33_P339 | 0.000855 | 0.0000555 | -3.27 | EXOC7          | exocyst complex component 7                                        | Downregulated |
| A_24_P114 | 0.000521 | 0.0000104 | -3.28 | CHMP2B         | charged multivesicular body protein 2B                             | Downregulated |
| A_33_P325 | 0.000669 | 0.0000286 | -3.28 | LOC1001292     | beta-defensin 131-like                                             | Downregulated |
| A_23_P339 | 0.003119 | 0.000604  | -3.28 | NUP62CL        | nucleoporin 62kDa C-terminal like                                  | Downregulated |
| A_23_P411 | 0.000515 | 9.49E-06  | -3.29 | PER2           | period circadian clock 2                                           | Downregulated |
| A_24_P319 | 0.000639 | 0.0000256 | -3.29 | NEK2           | NIMA-related kinase 2                                              | Downregulated |
| A_24_P298 | 0.002241 | 0.000364  | -3.29 | LOC1001307     | uncharacterized LOC100130744                                       | Downregulated |
| A_23_P153 | 0.002709 | 0.000486  | -3.29 | GNG7           | guanine nucleotide binding protein (G protein), gamma 7            | Downregulated |
| A_32_P438 | 0.001098 | 0.0000987 | -3.3  | NEUROG2        | neurogenin 2                                                       | Downregulated |
| A_24_P940 | 0.00126  | 0.000131  | -3.3  | SETX           | senataxin                                                          | Downregulated |
| A_24_P145 | 0.001555 | 0.000192  | -3.3  | DTNBP1         | dystrobrevin binding protein 1                                     | Downregulated |
| A_22_P000 | 0.003027 | 0.000576  | -3.3  | lnc-RPL7L1-1   | lnc-RPL7L1-1:1                                                     | Downregulated |
| A_23_P411 | 0.003535 | 0.000728  | -3.3  | LRRC34         | leucine rich repeat containing 34                                  | Downregulated |
| A_23_P135 | 0.000483 | 5.83E-06  | -3.31 | MRPS2          | mitochondrial ribosomal protein S2                                 | Downregulated |
| A_33_P334 | 0.000526 | 0.0000121 | -3.31 | EHBP1          | EH domain binding protein 1                                        | Downregulated |
| A_21_P001 | 0.00056  | 0.0000156 | -3.31 | LOC1019284     | serine/threonine-protein kinase tousled-like 2-like                | Downregulated |
| A_24_P791 | 0.000786 | 0.0000453 | -3.31 | NUFIP2         | nuclear fragile X mental retardation protein interacting protein 2 | Downregulated |
| A_21_P000 | 0.001108 | 0.000101  | -3.31 | SNORA55        | small nucleolar RNA, H/ACA box 55                                  | Downregulated |

|           |          |           |       |                |                                                                             |               |
|-----------|----------|-----------|-------|----------------|-----------------------------------------------------------------------------|---------------|
| A_33_P330 | 0.000483 | 5.49E-06  | -3.32 | CR2            | complement component (3d/Epstein Barr virus) receptor 2                     | Downregulated |
| A_33_P336 | 0.000498 | 7.69E-06  | -3.32 | EIF4ENIF1      | eukaryotic translation initiation factor 4E nuclear import factor 1         | Downregulated |
| A_23_P640 | 0.00055  | 0.0000151 | -3.32 | FERMT3         | fermitin family member 3                                                    | Downregulated |
| A_24_P329 | 0.004738 | 0.00112   | -3.32 | SIK3           | SIK family kinase 3                                                         | Downregulated |
| A_23_P118 | 0.000778 | 0.0000441 | -3.33 | C1orf112       | chromosome 1 open reading frame 112                                         | Downregulated |
| A_23_P940 | 0.000948 | 0.0000695 | -3.33 | TRRAP          | transformation/transcription domain-associated protein                      | Downregulated |
| A_23_P122 | 0.000995 | 0.0000789 | -3.33 | AVL9           | AVL9 homolog (S. cerevisiae)                                                | Downregulated |
| A_24_P181 | 0.001062 | 0.000091  | -3.33 | TMEM135        | transmembrane protein 135                                                   | Downregulated |
| A_33_P334 | 0.001912 | 0.000276  | -3.33 | DHRS12         | dehydrogenase/reductase (SDR family) member 12                              | Downregulated |
| A_33_P340 | 0.002053 | 0.000315  | -3.33 | PPM1M          | protein phosphatase, Mg <sup>2+</sup> /Mn <sup>2+</sup> dependent, 1M       | Downregulated |
| A_24_P244 | 0.003134 | 0.000609  | -3.33 | EXOG           | endo/exonuclease (5'-3'), endonuclease G-like                               | Downregulated |
| A_22_P000 | 0.000556 | 0.0000153 | -3.34 | lnc-RP11-279   | lnc-RP11-279O9.4.1-2:1                                                      | Downregulated |
| A_23_P194 | 0.000575 | 0.0000176 | -3.34 | MDC1           | mediator of DNA-damage checkpoint 1                                         | Downregulated |
| A_33_P342 | 0.000579 | 0.0000195 | -3.34 | EIF3D          | eukaryotic translation initiation factor 3, subunit D                       | Downregulated |
| A_21_P001 | 0.00062  | 0.000024  | -3.34 | XLOC_I2_012210 |                                                                             | Downregulated |
| A_32_P118 | 0.001124 | 0.000104  | -3.34 | DENND6A        | DENN/MADD domain containing 6A                                              | Downregulated |
| A_24_P218 | 0.001297 | 0.000138  | -3.34 | CDCA3          | cell division cycle associated 3                                            | Downregulated |
| A_24_P126 | 0.001754 | 0.000238  | -3.34 | SLC12A9        | solute carrier family 12, member 9                                          | Downregulated |
| A_24_P413 | 0.004648 | 0.00109   | -3.34 | CENPA          | centromere protein A                                                        | Downregulated |
| A_23_P210 | 0.000483 | 5.11E-06  | -3.35 | CDC25B         | cell division cycle 25B                                                     | Downregulated |
| A_23_P368 | 0.000521 | 0.0000105 | -3.35 | LRRRC56        | leucine rich repeat containing 56                                           | Downregulated |
| A_23_P201 | 0.000603 | 0.000022  | -3.35 | PPP1R12B       | protein phosphatase 1, regulatory subunit 12B                               | Downregulated |
| A_21_P000 | 0.001081 | 0.0000952 | -3.35 | LOC1019276     | uncharacterized LOC101927686                                                | Downregulated |
| A_24_P535 | 0.001399 | 0.000159  | -3.35 | CHAF1A         | chromatin assembly factor 1, subunit A (p150)                               | Downregulated |
| A_33_P325 | 0.001626 | 0.000208  | -3.35 | KDM7A          | lysine (K)-specific demethylase 7A                                          | Downregulated |
| A_33_P327 | 0.001949 | 0.000286  | -3.35 | LOC90784       | uncharacterized LOC90784                                                    | Downregulated |
| A_33_P331 | 0.000486 | 7.19E-06  | -3.36 | MGAT1          | mannosyl (alpha-1,3-)-glycoprotein beta-1,2-N-acetylglucosaminyltransferase | Downregulated |
| A_23_P414 | 0.000526 | 0.0000127 | -3.36 | PLXNC1         | plexin C1                                                                   | Downregulated |
| A_21_P000 | 0.000814 | 0.0000499 | -3.36 | lnc-PRKAB2-    | lnc-PRKAB2-1:1                                                              | Downregulated |
| A_23_P345 | 0.001228 | 0.000125  | -3.36 | SCLY           | selenocysteine lyase                                                        | Downregulated |
| A_33_P362 | 0.00056  | 0.0000165 | -3.37 | PKI55          | DKFZp434H1419                                                               | Downregulated |
| A_33_P378 | 0.000795 | 0.0000469 | -3.37 | SCAMP1-AS1     | SCAMP1 antisense RNA 1                                                      | Downregulated |
| A_22_P000 | 0.000828 | 0.0000517 | -3.37 | lnc-RP11-33N   | lnc-RP11-33N16.1.1-1:1                                                      | Downregulated |
| A_23_P320 | 0.001197 | 0.000118  | -3.37 | SLC35D2        | solute carrier family 35 (UDP-GlcNAc/UDP-glucose transporter), member       | Downregulated |
| A_21_P000 | 0.005093 | 0.00124   | -3.37 | lnc-ZSCAN2-2   | lnc-ZSCAN2-2:1                                                              | Downregulated |
| A_23_P971 | 0.002568 | 0.000448  | -3.38 | MTFR1L         | mitochondrial fission regulator 1-like                                      | Downregulated |
| A_24_P380 | 0.002756 | 0.000499  | -3.38 | ARHGAP24       | Rho GTPase activating protein 24                                            | Downregulated |

|           |          |           |       |                |                                                                      |               |
|-----------|----------|-----------|-------|----------------|----------------------------------------------------------------------|---------------|
| A_23_P694 | 0.000483 | 5.13E-06  | -3.39 | GPR15          | G protein-coupled receptor 15                                        | Downregulated |
| A_23_P948 | 0.000486 | 6.83E-06  | -3.39 | S100A4         | S100 calcium binding protein A4                                      | Downregulated |
| A_22_P000 | 0.000515 | 9.66E-06  | -3.39 | lnc-HNRNPA1    | lnc-HNRNPA1-1:1                                                      | Downregulated |
| A_24_P641 | 0.000577 | 0.0000182 | -3.39 | SLC25A37       | solute carrier family 25 (mitochondrial iron transporter), member 37 | Downregulated |
| A_33_P380 | 0.000578 | 0.0000188 | -3.39 | LOC286437      | uncharacterized LOC286437                                            | Downregulated |
| A_23_P140 | 0.000763 | 0.000042  | -3.39 | DNAJC17        | DnaJ (Hsp40) homolog, subfamily C, member 17                         | Downregulated |
| A_23_P679 | 0.001198 | 0.000118  | -3.39 | C1D            | C1D nuclear receptor corepressor                                     | Downregulated |
| A_21_P000 | 0.001426 | 0.000164  | -3.39 | SNORD59A       | small nucleolar RNA, C/D box 59A                                     | Downregulated |
| A_23_P294 | 0.001548 | 0.000191  | -3.39 | GYG1           | glycogenin 1                                                         | Downregulated |
| A_19_P003 | 0.001885 | 0.00027   | -3.39 | PVT1           | Pvt1 oncogene (non-protein coding)                                   | Downregulated |
| A_22_P000 | 0.005619 | 0.00144   | -3.39 | lnc-AC135050   | lnc-AC135050.1-1:1                                                   | Downregulated |
| A_24_P237 | 0.001069 | 0.0000936 | -3.4  | FAM102B        | family with sequence similarity 102, member B                        | Downregulated |
| A_23_P132 | 0.001134 | 0.000106  | -3.4  | VGLL4          | vestigial-like family member 4                                       | Downregulated |
| A_33_P334 | 0.000483 | 0.0000063 | -3.41 | PRDM1          | PR domain containing 1, with ZNF domain                              | Downregulated |
| A_23_P270 | 0.000486 | 6.74E-06  | -3.41 | TMEM98         | transmembrane protein 98                                             | Downregulated |
| A_33_P344 | 0.000711 | 0.0000357 | -3.41 | FRMD4B         | FERM domain containing 4B                                            | Downregulated |
| A_23_P152 | 0.000961 | 0.0000719 | -3.41 | EFTUD1         | elongation factor Tu GTP binding domain containing 1                 | Downregulated |
| A_24_P177 | 0.001211 | 0.000121  | -3.41 | TBC1D9B        | TBC1 domain family, member 9B (with GRAM domain)                     | Downregulated |
| A_21_P001 | 0.000483 | 4.84E-06  | -3.42 | XLOC_I2_005781 |                                                                      | Downregulated |
| A_33_P365 | 0.000483 | 5.05E-06  | -3.42 | ERCC8          | excision repair cross-complementation group 8                        | Downregulated |
| A_33_P321 | 0.000537 | 0.0000141 | -3.42 | C15orf61       | chromosome 15 open reading frame 61                                  | Downregulated |
| A_33_P333 | 0.00055  | 0.000015  | -3.42 | B4GALT3        | UDP-Gal:betaGlcNAc beta 1,4- galactosyltransferase, polypeptide 3    | Downregulated |
| A_22_P000 | 0.000565 | 0.000017  | -3.42 | ZRANB2-AS1     | ZRANB2 antisense RNA 1                                               | Downregulated |
| A_23_P363 | 0.00179  | 0.000246  | -3.42 | FBXO3          | F-box protein 3                                                      | Downregulated |
| A_32_P122 | 0.000501 | 8.09E-06  | -3.43 | LOC441455      | makorin ring finger protein 1 pseudogene                             | Downregulated |
| A_22_P000 | 0.000521 | 0.0000102 | -3.43 | lnc-PDZD7-1    | lnc-PDZD7-1:1                                                        | Downregulated |
| A_33_P332 | 0.000582 | 0.0000198 | -3.43 | PDE4DIP        | phosphodiesterase 4D interacting protein                             | Downregulated |
| A_22_P000 | 0.001398 | 0.000158  | -3.43 | HOTAIRM1       | HOXA transcript antisense RNA, myeloid-specific 1                    | Downregulated |
| A_21_P001 | 0.000483 | 4.85E-06  | -3.44 | LINC01420      | long intergenic non-protein coding RNA 1420                          | Downregulated |
| A_21_P000 | 0.000483 | 5.16E-06  | -3.44 | lnc-FARP1-1    | lnc-FARP1-1:2                                                        | Downregulated |
| A_23_P135 | 0.000558 | 0.0000154 | -3.44 | EIF2AK3        | eukaryotic translation initiation factor 2-alpha kinase 3            | Downregulated |
| A_33_P325 | 0.000577 | 0.0000182 | -3.44 | CNTRL          | centriolin                                                           | Downregulated |
| A_33_P340 | 0.000883 | 0.0000591 | -3.44 | FLYWCH1        | FLYWCH-type zinc finger 1                                            | Downregulated |
| A_22_P000 | 0.000959 | 0.0000712 | -3.44 | lnc-APOM-3     | lnc-APOM-3:1                                                         | Downregulated |
| A_23_P327 | 0.00307  | 0.000588  | -3.44 | C3orf38        | chromosome 3 open reading frame 38                                   | Downregulated |
| A_22_P000 | 0.003205 | 0.000632  | -3.44 | SCAMP1         | secretory carrier membrane protein 1                                 | Downregulated |
| A_33_P681 | 0.000578 | 0.0000191 | -3.45 | NDUFA6-AS1     | NDUFA6 antisense RNA 1 (head to head)                                | Downregulated |

|           |          |           |       |              |                                                                       |               |
|-----------|----------|-----------|-------|--------------|-----------------------------------------------------------------------|---------------|
| A_24_P248 | 0.00076  | 0.0000417 | -3.45 | SYT11        | synaptotagmin XI                                                      | Downregulated |
| A_24_P442 | 0.000971 | 0.0000744 | -3.45 | FBXW8        | F-box and WD repeat domain containing 8                               | Downregulated |
| A_23_P349 | 0.00123  | 0.000125  | -3.45 | EVI5         | ecotropic viral integration site 5                                    | Downregulated |
| A_33_P335 | 0.001349 | 0.000148  | -3.45 | CTBP1        | C-terminal binding protein 1                                          | Downregulated |
| A_23_P210 | 0.002109 | 0.000329  | -3.45 | NSFL1C       | NSFL1 (p97) cofactor (p47)                                            | Downregulated |
| A_24_P193 | 0.000715 | 0.0000363 | -3.46 | DEF8         | differentially expressed in FDCP 8 homolog (mouse)                    | Downregulated |
| A_33_P332 | 0.001688 | 0.000222  | -3.46 | NMS          | neuromedin S                                                          | Downregulated |
| A_33_P353 | 0.002053 | 0.000315  | -3.46 | PRO2852      | uncharacterized protein PRO2852                                       | Downregulated |
| A_24_P405 | 0.002627 | 0.000464  | -3.46 | HOMEZ        | homeobox and leucine zipper encoding                                  | Downregulated |
| A_23_P877 | 0.002623 | 0.000462  | -3.47 | IFFO1        | intermediate filament family orphan 1                                 | Downregulated |
| A_33_P328 | 0.004142 | 0.000918  | -3.47 | MIER1        | mesoderm induction early response 1, transcriptional regulator        | Downregulated |
| A_24_P627 | 0.000534 | 0.0000136 | -3.48 | EPM2AIP1     | EPM2A (laforin) interacting protein 1                                 | Downregulated |
| A_23_P858 | 0.001563 | 0.000194  | -3.48 | GLMP         | glycosylated lysosomal membrane protein                               | Downregulated |
| A_33_P341 | 0.004152 | 0.000921  | -3.48 | ZNF268       | zinc finger protein 268                                               | Downregulated |
| A_23_P377 | 0.000502 | 8.43E-06  | -3.49 | TNFRSF17     | tumor necrosis factor receptor superfamily, member 17                 | Downregulated |
| A_24_P116 | 0.000563 | 0.0000168 | -3.49 | KLHDC2       | kelch domain containing 2                                             | Downregulated |
| A_33_P340 | 0.000938 | 0.0000675 | -3.49 | UBE3A        | ubiquitin protein ligase E3A                                          | Downregulated |
| A_19_P003 | 0.000942 | 0.0000683 | -3.49 | CA5BP1       | carbonic anhydrase VB pseudogene 1                                    | Downregulated |
| A_33_P324 | 0.000945 | 0.000069  | -3.49 | TMEM87A      | transmembrane protein 87A                                             | Downregulated |
| A_23_P145 | 0.002124 | 0.000335  | -3.49 | FIG4         | FIG4 phosphoinositide 5-phosphatase                                   | Downregulated |
| A_23_P106 | 0.000489 | 7.37E-06  | -3.5  | ORAI3        | ORAI calcium release-activated calcium modulator 3                    | Downregulated |
| A_33_P322 | 0.000498 | 7.83E-06  | -3.5  | CSRNP1       | cysteine-serine-rich nuclear protein 1                                | Downregulated |
| A_23_P116 | 0.000526 | 0.0000126 | -3.5  | PLA2G4A      | phospholipase A2, group IVA (cytosolic, calcium-dependent)            | Downregulated |
| A_33_P326 | 0.00056  | 0.0000156 | -3.5  | FAM167A      | family with sequence similarity 167, member A                         | Downregulated |
| A_23_P445 | 0.002701 | 0.000483  | -3.5  | DFFB         | DNA fragmentation factor, 40kDa, beta polypeptide (caspase-activated) | Downregulated |
| A_33_P340 | 0.000592 | 0.0000208 | -3.51 | AKT2         | v-akt murine thymoma viral oncogene homolog 2                         | Downregulated |
| A_22_P000 | 0.000622 | 0.0000243 | -3.51 | ARHGEF38     | Rho guanine nucleotide exchange factor (GEF) 38                       | Downregulated |
| A_23_P409 | 0.000701 | 0.0000327 | -3.51 | NR2C2        | nuclear receptor subfamily 2, group C, member 2                       | Downregulated |
| A_33_P332 | 0.001363 | 0.00015   | -3.51 | FANCL        | Fanconi anemia, complementation group L                               | Downregulated |
| A_24_P141 | 0.001943 | 0.000284  | -3.51 | METAP2       | methionyl aminopeptidase 2                                            | Downregulated |
| A_22_P000 | 0.002832 | 0.000519  | -3.51 | lnc-SPTBN5-1 | lnc-SPTBN5-1:1                                                        | Downregulated |
| A_22_P000 | 0.000578 | 0.0000189 | -3.52 | LOC1019276   | uncharacterized LOC101927609                                          | Downregulated |
| A_21_P000 | 0.000912 | 0.0000635 | -3.52 | SNORD92      | small nucleolar RNA, C/D box 92                                       | Downregulated |
| A_21_P000 | 0.00234  | 0.000388  | -3.52 | lnc-ANKRD27  | lnc-ANKRD27-2:3                                                       | Downregulated |
| A_21_P001 | 0.002968 | 0.000559  | -3.52 | MMP25-AS1    | MMP25 antisense RNA 1                                                 | Downregulated |
| A_22_P000 | 0.000483 | 6.01E-06  | -3.53 | TRG-AS1      | T cell receptor gamma locus antisense RNA 1                           | Downregulated |
| A_23_P399 | 0.000995 | 0.0000783 | -3.53 | COA5         | cytochrome c oxidase assembly factor 5                                | Downregulated |

|           |          |           |       |                |                                                      |               |
|-----------|----------|-----------|-------|----------------|------------------------------------------------------|---------------|
| A_23_P137 | 0.001043 | 0.0000874 | -3.53 | BTK            | Bruton agammaglobulinemia tyrosine kinase            | Downregulated |
| A_33_P334 | 0.004301 | 0.000973  | -3.53 | KMT2D          | lysine (K)-specific methyltransferase 2D             | Downregulated |
| A_33_P332 | 0.000483 | 4.28E-06  | -3.54 | RHOT1          | ras homolog family member T1                         | Downregulated |
| A_24_P356 | 0.000577 | 0.0000184 | -3.54 | MAP2K5         | mitogen-activated protein kinase kinase 5            | Downregulated |
| A_21_P000 | 0.000603 | 0.0000223 | -3.54 | lnc-HERPUD2    | lnc-HERPUD2-1:1                                      | Downregulated |
| A_21_P001 | 0.002168 | 0.000346  | -3.54 | XLOC_I2_002790 |                                                      | Downregulated |
| A_23_P139 | 0.001499 | 0.00018   | -3.55 | DHX37          | DEAH (Asp-Glu-Ala-His) box polypeptide 37            | Downregulated |
| A_22_P000 | 0.003909 | 0.000845  | -3.55 | LOC1027245     | uncharacterized LOC102724532                         | Downregulated |
| A_21_P000 | 0.000905 | 0.0000619 | -3.56 | lnc-RNFT2-1    | lnc-RNFT2-1:1                                        | Downregulated |
| A_23_P303 | 0.000494 | 7.51E-06  | -3.57 | CHMP7          | charged multivesicular body protein 7                | Downregulated |
| A_33_P383 | 0.00056  | 0.000016  | -3.57 | RNU4ATAC       | RNA, U4atac small nuclear (U12-dependent splicing)   | Downregulated |
| A_23_P359 | 0.0015   | 0.000181  | -3.57 | AKAP2          | A kinase (PRKA) anchor protein 2                     | Downregulated |
| A_33_P341 | 0.003266 | 0.000649  | -3.57 | ANKRD36B       | ankyrin repeat domain 36B                            | Downregulated |
| A_23_P410 | 0.003509 | 0.00072   | -3.57 | RASSF1         | Ras association (RalGDS/AF-6) domain family member 1 | Downregulated |
| A_32_P112 | 0.000707 | 0.0000339 | -3.58 | LINC00999      | long intergenic non-protein coding RNA 999           | Downregulated |
| A_33_P324 | 0.00072  | 0.000037  | -3.58 | TMCO3          | transmembrane and coiled-coil domains 3              | Downregulated |
| A_22_P000 | 0.000483 | 6.35E-06  | -3.59 | LYST           | lysosomal trafficking regulator                      | Downregulated |
| A_21_P000 | 0.000483 | 6.42E-06  | -3.59 | LOC1019297     | uncharacterized LOC101929719                         | Downregulated |
| A_23_P778 | 0.000945 | 0.0000689 | -3.59 | FN3KRP         | fructosamine 3 kinase related protein                | Downregulated |
| A_23_P427 | 0.001178 | 0.000114  | -3.59 | LOC646652      | integral membrane glycoprotein-like                  | Downregulated |
| A_23_P203 | 0.001443 | 0.000168  | -3.59 | DPYS           | dihydropyrimidinase                                  | Downregulated |
| A_22_P000 | 0.001925 | 0.00028   | -3.59 | lnc-PRR25-2    | lnc-PRR25-2:1                                        | Downregulated |
| A_23_P300 | 0.000642 | 0.0000262 | -3.6  | DDX60L         | DEAD (Asp-Glu-Ala-Asp) box polypeptide 60-like       | Downregulated |
| A_23_P169 | 0.000776 | 0.0000438 | -3.6  | EXOC6          | exocyst complex component 6                          | Downregulated |
| A_24_P300 | 0.000788 | 0.0000457 | -3.6  | SCN9A          | sodium channel, voltage gated, type IX alpha subunit | Downregulated |
| A_24_P745 | 0.001612 | 0.000205  | -3.6  | CYTH4          | cytohesin 4                                          | Downregulated |
| A_23_P205 | 0.000605 | 0.0000227 | -3.61 | DHRS12         | dehydrogenase/reductase (SDR family) member 12       | Downregulated |
| A_33_P365 | 0.000642 | 0.0000262 | -3.61 | SNORA26        | small nucleolar RNA, H/ACA box 26                    | Downregulated |
| A_23_P935 | 0.000707 | 0.0000337 | -3.61 | SAMD3          | sterile alpha motif domain containing 3              | Downregulated |
| A_21_P000 | 0.000866 | 0.000057  | -3.61 | lnc-PHACTR1    | lnc-PHACTR1-1:1                                      | Downregulated |
| A_33_P341 | 0.001287 | 0.000136  | -3.61 | lnc-VIM-1      | lnc-VIM-1:2                                          | Downregulated |
| A_23_P404 | 0.001559 | 0.000193  | -3.61 | ARHGAP33       | Rho GTPase activating protein 33                     | Downregulated |
| A_23_P368 | 0.003646 | 0.000762  | -3.61 | TMEM131        | transmembrane protein 131                            | Downregulated |
| A_23_P131 | 0.004198 | 0.000937  | -3.61 | SNAI1          | snail family zinc finger 1                           | Downregulated |
| A_19_P003 | 0.000812 | 0.0000494 | -3.62 | LINC01094      | long intergenic non-protein coding RNA 1094          | Downregulated |
| A_21_P001 | 0.001597 | 0.000201  | -3.62 | XLOC_I2_006173 |                                                      | Downregulated |
| A_23_P105 | 0.005153 | 0.00127   | -3.62 | POC1B          | POC1 centriolar protein B                            | Downregulated |

|           |          |           |       |                |                                                                       |               |
|-----------|----------|-----------|-------|----------------|-----------------------------------------------------------------------|---------------|
| A_24_P235 | 0.00055  | 0.000015  | -3.63 | ZNF706         | zinc finger protein 706                                               | Downregulated |
| A_24_P382 | 0.00056  | 0.0000158 | -3.63 | RPRD1A         | regulation of nuclear pre-mRNA domain containing 1A                   | Downregulated |
| A_22_P000 | 0.000603 | 0.0000221 | -3.63 | LOC1027238     | uncharacterized LOC102723885                                          | Downregulated |
| A_23_P161 | 0.000849 | 0.0000545 | -3.63 | TMEM134        | transmembrane protein 134                                             | Downregulated |
| A_23_P258 | 0.000925 | 0.0000652 | -3.63 | PPM1M          | protein phosphatase, Mg <sup>2+</sup> /Mn <sup>2+</sup> dependent, 1M | Downregulated |
| A_33_P335 | 0.0011   | 0.0000992 | -3.63 | LOC1001309     | uncharacterized LOC100130913                                          | Downregulated |
| A_33_P328 | 0.001117 | 0.000103  | -3.63 | CRAT           | carnitine O-acetyltransferase                                         | Downregulated |
| A_24_P379 | 0.000483 | 0.0000046 | -3.64 | CHCHD5         | coiled-coil-helix-coiled-coil-helix domain containing 5               | Downregulated |
| A_22_P000 | 0.001064 | 0.0000915 | -3.64 | ERICH2         | glutamate-rich 2                                                      | Downregulated |
| A_23_P110 | 0.000483 | 4.09E-06  | -3.65 | WDR53          | WD repeat domain 53                                                   | Downregulated |
| A_21_P000 | 0.000537 | 0.0000142 | -3.65 | SNORD63        | small nucleolar RNA, C/D box 63                                       | Downregulated |
| A_23_P615 | 0.000715 | 0.0000363 | -3.65 | CCDC71         | coiled-coil domain containing 71                                      | Downregulated |
| A_23_P884 | 0.002389 | 0.000401  | -3.65 | FOXN3          | forkhead box N3                                                       | Downregulated |
| A_22_P000 | 0.000483 | 0.000004  | -3.66 | lnc-WRAP73-    | lnc-WRAP73-2:1                                                        | Downregulated |
| A_23_P420 | 0.000544 | 0.0000147 | -3.66 | BPHL           | biphenyl hydrolase-like (serine hydrolase)                            | Downregulated |
| A_23_P136 | 0.000663 | 0.000028  | -3.66 | ZBTB39         | zinc finger and BTB domain containing 39                              | Downregulated |
| A_33_P329 | 0.000695 | 0.0000316 | -3.66 | RPL28          | ribosomal protein L28                                                 | Downregulated |
| A_33_P339 | 0.000775 | 0.0000436 | -3.66 | AKAP5          | A kinase (PRKA) anchor protein 5                                      | Downregulated |
| A_33_P359 | 0.001758 | 0.000239  | -3.66 | FAM91A1        | family with sequence similarity 91, member A1                         | Downregulated |
| A_24_P818 | 0.000483 | 4.23E-06  | -3.67 | CDKN1B         | cyclin-dependent kinase inhibitor 1B (p27, Kip1)                      | Downregulated |
| A_32_P140 | 0.00088  | 0.0000586 | -3.67 | F13A1          | coagulation factor XIII, A1 polypeptide                               | Downregulated |
| A_22_P000 | 0.001009 | 0.0000815 | -3.67 | lnc-MIER3-2    | lnc-MIER3-2:1                                                         | Downregulated |
| A_23_P252 | 0.000483 | 4.79E-06  | -3.68 | WBP1           | WW domain binding protein 1                                           | Downregulated |
| A_33_P325 | 0.000521 | 0.0000105 | -3.68 | ZNF551         | zinc finger protein 551                                               | Downregulated |
| A_23_P204 | 0.001427 | 0.000164  | -3.68 | ITFG2          | integrin alpha FG-GAP repeat containing 2                             | Downregulated |
| A_21_P000 | 0.001998 | 0.0003    | -3.68 | lnc-RBM10-1    | lnc-RBM10-1:1                                                         | Downregulated |
| A_23_P597 | 0.000483 | 6.36E-06  | -3.69 | SRI            | sorcin                                                                | Downregulated |
| A_21_P000 | 0.001006 | 0.0000809 | -3.69 | LINC01578      | long intergenic non-protein coding RNA 1578                           | Downregulated |
| A_33_P339 | 0.001035 | 0.0000857 | -3.69 | LINC01420      | long intergenic non-protein coding RNA 1420                           | Downregulated |
| A_33_P336 | 0.00111  | 0.000101  | -3.69 | FRS2           | fibroblast growth factor receptor substrate 2                         | Downregulated |
| A_22_P000 | 0.001956 | 0.000288  | -3.69 | LOC1019274     | uncharacterized LOC101927418                                          | Downregulated |
| A_33_P338 | 0.003669 | 0.00077   | -3.69 | TEX9           | testis expressed 9                                                    | Downregulated |
| A_21_P001 | 0.005534 | 0.00141   | -3.7  | XLOC_l2_009448 |                                                                       | Downregulated |
| A_23_P364 | 0.000483 | 0.0000044 | -3.71 | TXLNGY         | taxilin gamma pseudogene, Y-linked                                    | Downregulated |
| A_21_P001 | 0.000697 | 0.000032  | -3.71 | UBE2Q2P1       | ubiquitin-conjugating enzyme E2Q family member 2 pseudogene 1         | Downregulated |
| A_24_P927 | 0.001086 | 0.0000961 | -3.71 | SLED1          | proteoglycan 3 pseudogene                                             | Downregulated |
| A_33_P342 | 0.00056  | 0.0000163 | -3.73 | UVSSA          | UV-stimulated scaffold protein A                                      | Downregulated |

|           |          |           |       |                |                                                             |               |
|-----------|----------|-----------|-------|----------------|-------------------------------------------------------------|---------------|
| A_33_P323 | 0.000532 | 0.0000134 | -3.74 | GOLGA6L9       | golgin A6 family-like 9                                     | Downregulated |
| A_23_P205 | 0.00104  | 0.0000864 | -3.74 | PDS5B          | PDS5 cohesin associated factor B                            | Downregulated |
| A_23_P250 | 0.002326 | 0.000385  | -3.74 | CAND2          | cullin-associated and neddylation-dissociated 2 (putative)  | Downregulated |
| A_33_P328 | 0.000515 | 0.0000093 | -3.75 | ARF3           | ADP-ribosylation factor 3                                   | Downregulated |
| A_23_P541 | 0.00072  | 0.0000372 | -3.75 | MED6           | mediator complex subunit 6                                  | Downregulated |
| A_21_P000 | 0.001108 | 0.000101  | -3.75 | lnc-USP8-2     | lnc-USP8-2:8                                                | Downregulated |
| A_23_P259 | 0.001432 | 0.000165  | -3.75 | NCOA6          | nuclear receptor coactivator 6                              | Downregulated |
| A_22_P000 | 0.001755 | 0.000238  | -3.75 | lnc-CHAC1-4    | lnc-CHAC1-4:1                                               | Downregulated |
| A_21_P000 | 0.001021 | 0.0000832 | -3.76 | lnc-DIRAS2-1   | lnc-DIRAS2-1:4                                              | Downregulated |
| A_22_P000 | 0.004207 | 0.000941  | -3.76 | lnc-SUSD1-2    | lnc-SUSD1-2:1                                               | Downregulated |
| A_21_P001 | 0.004217 | 0.000945  | -3.76 | XLOC_I2_010511 |                                                             | Downregulated |
| A_33_P338 | 0.000483 | 4.45E-06  | -3.77 | USP9X          | ubiquitin specific peptidase 9, X-linked                    | Downregulated |
| A_33_P328 | 0.000707 | 0.0000346 | -3.77 | AP1S3          | adaptor-related protein complex 1, sigma 3 subunit          | Downregulated |
| A_21_P000 | 0.000806 | 0.0000485 | -3.77 | LOC1005057     | uncharacterized LOC100505716                                | Downregulated |
| A_23_P110 | 0.001064 | 0.0000916 | -3.77 | METTL14        | methyltransferase like 14                                   | Downregulated |
| A_23_P217 | 0.000483 | 3.89E-06  | -3.78 | VPS13A         | vacuolar protein sorting 13 homolog A (S. cerevisiae)       | Downregulated |
| A_33_P331 | 0.000938 | 0.0000672 | -3.78 | BBIP1          | BBSome interacting protein 1                                | Downregulated |
| A_21_P000 | 0.001161 | 0.000111  | -3.78 | lnc-APITD1-1   | lnc-APITD1-1:1                                              | Downregulated |
| A_23_P432 | 0.001154 | 0.00011   | -3.8  | CCDC125        | coiled-coil domain containing 125                           | Downregulated |
| A_23_P183 | 0.001385 | 0.000154  | -3.8  | ARMC8          | armadillo repeat containing 8                               | Downregulated |
| A_24_P449 | 0.000527 | 0.0000129 | -3.81 | MPND           | MPN domain containing                                       | Downregulated |
| A_23_P411 | 0.000706 | 0.0000334 | -3.81 | APEH           | acylaminoacyl-peptide hydrolase                             | Downregulated |
| A_22_P000 | 0.000575 | 0.0000175 | -3.82 | CNPY3          | canopy FGF signaling regulator 3                            | Downregulated |
| A_23_P363 | 0.001845 | 0.000261  | -3.82 | INPPL1         | inositol polyphosphate phosphatase-like 1                   | Downregulated |
| A_23_P157 | 0.001863 | 0.000265  | -3.82 | BZW2           | basic leucine zipper and W2 domains 2                       | Downregulated |
| A_23_P250 | 0.00275  | 0.000497  | -3.82 | HDAC6          | histone deacetylase 6                                       | Downregulated |
| A_22_P000 | 0.000697 | 0.0000318 | -3.83 | lnc-ZNF131-2   | lnc-ZNF131-2:2                                              | Downregulated |
| A_21_P000 | 0.000534 | 0.0000136 | -3.84 | SNORA45B       | small nucleolar RNA, H/ACA box 45B                          | Downregulated |
| A_21_P000 | 0.000589 | 0.0000205 | -3.84 | SNORD36C       | small nucleolar RNA, C/D box 36C                            | Downregulated |
| A_21_P000 | 0.000839 | 0.0000531 | -3.84 | lnc-SEL1L3-1   | lnc-SEL1L3-1:3                                              | Downregulated |
| A_33_P335 | 0.00119  | 0.000117  | -3.84 | OSBPL7         | oxysterol binding protein-like 7                            | Downregulated |
| A_23_P134 | 0.001375 | 0.000153  | -3.84 | USP45          | ubiquitin specific peptidase 45                             | Downregulated |
| A_33_P341 | 0.002393 | 0.000402  | -3.84 | EGOT           | eosinophil granule ontogeny transcript (non-protein coding) | Downregulated |
| A_21_P001 | 0.000689 | 0.0000303 | -3.85 | lnc-TPTE2-2    | lnc-TPTE2-2:1                                               | Downregulated |
| A_21_P000 | 0.000842 | 0.0000534 | -3.85 | lnc-MEF2D-1    | lnc-MEF2D-1:1                                               | Downregulated |
| A_33_P327 | 0.002055 | 0.000316  | -3.85 | DIS3L2         | DIS3 like 3'-5' exoribonuclease 2                           | Downregulated |
| A_23_P958 | 0.000483 | 3.63E-06  | -3.86 | TUFM           | Tu translation elongation factor, mitochondrial             | Downregulated |



|           |          |           |       |                |                                                                           |               |
|-----------|----------|-----------|-------|----------------|---------------------------------------------------------------------------|---------------|
| A_22_P000 | 0.000483 | 5.13E-06  | -3.86 | lnc-PMEL-1     | lnc-PMEL-1:1                                                              | Downregulated |
| A_33_P337 | 0.000799 | 0.0000474 | -3.86 | CACUL1         | CDK2-associated, cullin domain 1                                          | Downregulated |
| A_23_P202 | 0.000483 | 4.74E-06  | -3.87 | SFXN3          | sideroflexin 3                                                            | Downregulated |
| A_22_P000 | 0.000515 | 0.0000096 | -3.87 | lnc-OPN4-1     | lnc-OPN4-1:2                                                              | Downregulated |
| A_24_P359 | 0.00071  | 0.0000353 | -3.87 | GPATCH8        | G patch domain containing 8                                               | Downregulated |
| A_22_P000 | 0.001101 | 0.0000996 | -3.87 | BLCAP          | bladder cancer associated protein                                         | Downregulated |
| A_23_P251 | 0.00121  | 0.000121  | -3.87 | RFESD          | Rieske (Fe-S) domain containing                                           | Downregulated |
| A_33_P329 | 0.000486 | 6.58E-06  | -3.89 | SART1          | squamous cell carcinoma antigen recognized by T cells                     | Downregulated |
| A_24_P106 | 0.000525 | 0.0000114 | -3.89 | SLC44A2        | solute carrier family 44 (choline transporter), member 2                  | Downregulated |
| A_21_P000 | 0.000515 | 9.64E-06  | -3.9  | SNORD59B       | small nucleolar RNA, C/D box 59B                                          | Downregulated |
| A_33_P330 | 0.00056  | 0.0000163 | -3.9  | PTPRS          | protein tyrosine phosphatase, receptor type, S                            | Downregulated |
| A_24_P191 | 0.000592 | 0.0000207 | -3.9  | SAP30L         | SAP30-like                                                                | Downregulated |
| A_23_P145 | 0.003854 | 0.000829  | -3.9  | ACOT4          | acyl-CoA thioesterase 4                                                   | Downregulated |
| A_24_P130 | 0.000521 | 0.0000107 | -3.91 | NSUN4          | NOP2/Sun domain family, member 4                                          | Downregulated |
| A_23_P140 | 0.000549 | 0.0000149 | -3.91 | AKAP3          | A kinase (PRKA) anchor protein 3                                          | Downregulated |
| A_23_P119 | 0.00056  | 0.000016  | -3.91 | SLC6A9         | solute carrier family 6 (neurotransmitter transporter, glycine), member 9 | Downregulated |
| A_23_P203 | 0.000597 | 0.0000213 | -3.91 | CREBZF         | CREB/ATF bZIP transcription factor                                        | Downregulated |
| A_24_P174 | 0.000812 | 0.0000493 | -3.91 | SLC22A5        | solute carrier family 22 (organic cation/carnitine transporter), member 5 | Downregulated |
| A_23_P215 | 0.000537 | 0.0000139 | -3.92 | FKBP14         | FK506 binding protein 14, 22 kDa                                          | Downregulated |
| A_33_P335 | 0.000543 | 0.0000146 | -3.92 | FBXO22-AS1     | FBXO22 antisense RNA 1                                                    | Downregulated |
| A_23_P290 | 0.00072  | 0.0000372 | -3.92 | CBR1           | carbonyl reductase 1                                                      | Downregulated |
| A_33_P379 | 0.002333 | 0.000386  | -3.92 | LOC1027236     | uncharacterized LOC102723652                                              | Downregulated |
| A_21_P001 | 0.000839 | 0.000053  | -3.93 | XLOC_I2_014331 |                                                                           | Downregulated |
| A_32_P284 | 0.000483 | 0.0000041 | -3.94 | LRRC37BP1      | leucine rich repeat containing 37B pseudogene 1                           | Downregulated |
| A_33_P330 | 0.000483 | 4.48E-06  | -3.94 | TLE4           | transducin-like enhancer of split 4                                       | Downregulated |
| A_22_P000 | 0.001653 | 0.000214  | -3.94 | lnc-GTDC1-3    | lnc-GTDC1-3:1                                                             | Downregulated |
| A_23_P436 | 0.000525 | 0.0000115 | -3.95 | SLC25A42       | solute carrier family 25, member 42                                       | Downregulated |
| A_33_P338 | 0.002951 | 0.000553  | -3.95 | LCK            | LCK proto-oncogene, Src family tyrosine kinase                            | Downregulated |
| A_33_P333 | 0.00058  | 0.0000196 | -3.96 | NUDT17         | nudix (nucleoside diphosphate linked moiety X)-type motif 17              | Downregulated |
| A_23_P146 | 0.00124  | 0.000127  | -3.96 | NIPAL2         | NIPA-like domain containing 2                                             | Downregulated |
| A_21_P000 | 0.000483 | 4.32E-06  | -3.97 | SNORD12C       | small nucleolar RNA, C/D box 12C                                          | Downregulated |
| A_21_P001 | 0.000731 | 0.0000383 | -3.97 | LOC1019277     | uncharacterized LOC101927752                                              | Downregulated |
| A_23_P417 | 0.001049 | 0.0000885 | -3.97 | TSPYL5         | TSPY-like 5                                                               | Downregulated |
| A_23_P162 | 0.001076 | 0.0000943 | -3.97 | HECTD4         | HECT domain containing E3 ubiquitin protein ligase 4                      | Downregulated |
| A_19_P003 | 0.002196 | 0.000353  | -3.97 | CDYL2          | chromodomain protein, Y-like 2                                            | Downregulated |
| A_33_P340 | 0.000526 | 0.0000117 | -3.98 | POTEM          | POTE ankyrin domain family, member M                                      | Downregulated |
| A_23_P215 | 0.000526 | 0.0000128 | -3.98 | DUS4L          | dihydrouridine synthase 4-like (S. cerevisiae)                            | Downregulated |

|           |          |           |       |               |                                                                                    |               |
|-----------|----------|-----------|-------|---------------|------------------------------------------------------------------------------------|---------------|
| A_23_P149 | 0.000534 | 0.0000136 | -3.98 | HIST2H2BE     | histone cluster 2, H2be                                                            | Downregulated |
| A_22_P000 | 0.000577 | 0.0000179 | -3.98 | lnc-ZNF382-1  | lnc-ZNF382-1:1                                                                     | Downregulated |
| A_23_P354 | 0.001404 | 0.00016   | -3.98 | CTHF18        | CTF18, chromosome transmission fidelity factor 18 homolog (S. cerevisiae)          | Downregulated |
| A_24_P273 | 0.003795 | 0.000809  | -3.98 | TP63          | tumor protein p63                                                                  | Downregulated |
| A_33_P335 | 0.000543 | 0.0000146 | -3.99 | PVT1          | Pvt1 oncogene (non-protein coding)                                                 | Downregulated |
| A_21_P000 | 0.001195 | 0.000118  | -3.99 | NBPF15        | neuroblastoma breakpoint family, member 15                                         | Downregulated |
| A_33_P339 | 0.002727 | 0.000491  | -3.99 | SNX22         | sorting nexin 22                                                                   | Downregulated |
| A_32_P462 | 0.001847 | 0.000261  | -4    | SLC9A9        | solute carrier family 9, subfamily A (NHE9, cation proton antiporter 9), member 9  | Downregulated |
| A_22_P000 | 0.002957 | 0.000555  | -4    | lnc-C7orf13-1 | lnc-C7orf13-1:1                                                                    | Downregulated |
| A_23_P348 | 0.000483 | 3.19E-06  | -4.01 | TCEANC2       | transcription elongation factor A (SII) N-terminal and central domain containing 2 | Downregulated |
| A_33_P337 | 0.001107 | 0.0001    | -4.01 | BTN1A1        | butyrophilin, subfamily 1, member A1                                               | Downregulated |
| A_33_P333 | 0.000483 | 3.14E-06  | -4.02 | SLC44A2       | solute carrier family 44 (choline transporter), member 2                           | Downregulated |
| A_23_P516 | 0.000995 | 0.0000791 | -4.02 | MUTYH         | mutY homolog                                                                       | Downregulated |
| A_33_P341 | 0.000483 | 2.91E-06  | -4.03 | CLCC1         | chloride channel CLIC-like 1                                                       | Downregulated |
| A_33_P332 | 0.000589 | 0.0000204 | -4.04 | SMIM12        | small integral membrane protein 12                                                 | Downregulated |
| A_33_P337 | 0.000707 | 0.0000337 | -4.04 | PAPD5         | PAP associated domain containing 5                                                 | Downregulated |
| A_23_P129 | 0.000707 | 0.0000337 | -4.04 | VASN          | vasorin                                                                            | Downregulated |
| A_23_P137 | 0.001099 | 0.0000989 | -4.04 | IGSF8         | immunoglobulin superfamily, member 8                                               | Downregulated |
| A_22_P000 | 0.001406 | 0.00016   | -4.04 | lnc-ZNF687-1  | lnc-ZNF687-1:1                                                                     | Downregulated |
| A_22_P000 | 0.004121 | 0.000911  | -4.04 | lnc-MFSD4-1   | lnc-MFSD4-1:1                                                                      | Downregulated |
| A_22_P000 | 0.000537 | 0.000014  | -4.05 | FAM184B       | family with sequence similarity 184, member B                                      | Downregulated |
| A_24_P123 | 0.000778 | 0.0000442 | -4.05 | SEC63         | SEC63 homolog (S. cerevisiae)                                                      | Downregulated |
| A_22_P000 | 0.000526 | 0.0000122 | -4.06 | LIMD1-AS1     | LIMD1 antisense RNA 1                                                              | Downregulated |
| A_32_P206 | 0.00056  | 0.0000156 | -4.06 | QSOX2         | quiescin Q6 sulfhydryl oxidase 2                                                   | Downregulated |
| A_22_P000 | 0.000695 | 0.0000312 | -4.06 | lnc-MYL4-2    | lnc-MYL4-2:1                                                                       | Downregulated |
| A_23_P397 | 0.000483 | 4.78E-06  | -4.07 | GLS           | glutaminase                                                                        | Downregulated |
| A_22_P000 | 0.000515 | 9.48E-06  | -4.07 | SLFNL1-AS1    | SLFNL1 antisense RNA 1                                                             | Downregulated |
| A_22_P000 | 0.000677 | 0.0000295 | -4.07 | lnc-STUB1-1   | lnc-STUB1-1:1                                                                      | Downregulated |
| A_33_P333 | 0.000483 | 2.42E-06  | -4.08 | SNX29         | sorting nexin 29                                                                   | Downregulated |
| A_32_P224 | 0.000483 | 3.82E-06  | -4.08 | SLC25A23      | solute carrier family 25 (mitochondrial carrier; phosphate carrier), member 23     | Downregulated |
| A_21_P000 | 0.000483 | 5.49E-06  | -4.08 | ZBTB24        | zinc finger and BTB domain containing 24                                           | Downregulated |
| A_33_P329 | 0.000513 | 9.02E-06  | -4.08 | KCNQ1OT1      | KCNQ1 opposite strand/antisense transcript 1 (non-protein coding)                  | Downregulated |
| A_33_P327 | 0.000779 | 0.0000443 | -4.08 | SIRT2         | sirtuin 2                                                                          | Downregulated |
| A_33_P350 | 0.000788 | 0.0000458 | -4.08 | LOC780529     | uncharacterized LOC780529                                                          | Downregulated |
| A_22_P000 | 0.001009 | 0.0000815 | -4.08 | lnc-ERAP1-1   | lnc-ERAP1-1:1                                                                      | Downregulated |
| A_33_P341 | 0.001727 | 0.000232  | -4.08 | RAP2C-AS1     | RAP2C antisense RNA 1                                                              | Downregulated |
| A_33_P323 | 0.000684 | 0.00003   | -4.09 | CHCHD6        | coiled-coil-helix-coiled-coil-helix domain containing 6                            | Downregulated |

|           |          |           |       |              |                                                                              |               |
|-----------|----------|-----------|-------|--------------|------------------------------------------------------------------------------|---------------|
| A_33_P321 | 0.000987 | 0.0000765 | -4.09 | TLE1         | transducin-like enhancer of split 1 (E(sp1) homolog, Drosophila)             | Downregulated |
| A_22_P000 | 0.001213 | 0.000121  | -4.09 | lnc-CEP120-2 | lnc-CEP120-2:1                                                               | Downregulated |
| A_23_P961 | 0.001658 | 0.000215  | -4.09 | C11orf80     | chromosome 11 open reading frame 80                                          | Downregulated |
| A_23_P843 | 0.000483 | 0.0000028 | -4.1  | SIGIRR       | single immunoglobulin and toll-interleukin 1 receptor (TIR) domain           | Downregulated |
| A_21_P000 | 0.000535 | 0.0000137 | -4.1  | lnc-PEAK1.1- | lnc-PEAK1.1-1:3                                                              | Downregulated |
| A_23_P406 | 0.000691 | 0.0000307 | -4.1  | SRPK2        | SRSF protein kinase 2                                                        | Downregulated |
| A_21_P000 | 0.000499 | 0.0000008 | -4.11 | PEAK1        | pseudopodium-enriched atypical kinase 1                                      | Downregulated |
| A_21_P000 | 0.000515 | 9.19E-06  | -4.11 | lnc-TAF1A-1  | lnc-TAF1A-1:1                                                                | Downregulated |
| A_23_P999 | 0.000483 | 6.11E-06  | -4.12 | LRRK1        | leucine-rich repeat kinase 1                                                 | Downregulated |
| A_33_P681 | 0.000521 | 0.0000107 | -4.12 | LOC1005068   | uncharacterized LOC100506844                                                 | Downregulated |
| A_21_P001 | 0.000542 | 0.0000145 | -4.12 | LOC1019278   | uncharacterized LOC101927811                                                 | Downregulated |
| A_23_P155 | 0.00093  | 0.0000661 | -4.12 | ABHD14B      | abhydrolase domain containing 14B                                            | Downregulated |
| A_23_P308 | 0.001443 | 0.000167  | -4.13 | MAP3K15      | mitogen-activated protein kinase kinase kinase 15                            | Downregulated |
| A_24_P228 | 0.001597 | 0.000201  | -4.13 | CYB5D2       | cytochrome b5 domain containing 2                                            | Downregulated |
| A_22_P000 | 0.000537 | 0.0000139 | -4.14 | KDM4C        | lysine (K)-specific demethylase 4C                                           | Downregulated |
| A_23_P638 | 0.000596 | 0.0000021 | -4.14 | CTBP2        | C-terminal binding protein 2                                                 | Downregulated |
| A_23_P208 | 0.000602 | 0.0000219 | -4.14 | ZNF407       | zinc finger protein 407                                                      | Downregulated |
| A_23_P514 | 0.000662 | 0.0000279 | -4.14 | GBP3         | guanylate binding protein 3                                                  | Downregulated |
| A_23_P153 | 0.000788 | 0.0000457 | -4.14 | ARMC7        | armadillo repeat containing 7                                                | Downregulated |
| A_22_P000 | 0.002601 | 0.000457  | -4.14 | LINC00173    | long intergenic non-protein coding RNA 173                                   | Downregulated |
| A_21_P000 | 0.000483 | 2.27E-06  | -4.15 | lnc-PIGF-3   | lnc-PIGF-3:1                                                                 | Downregulated |
| A_23_P218 | 0.000521 | 0.0000107 | -4.16 | SERPINA1     | serpin peptidase inhibitor, clade A (alpha-1 antiproteinase, antitrypsin), I | Downregulated |
| A_33_P327 | 0.000577 | 0.0000185 | -4.16 | HSD17B7      | hydroxysteroid (17-beta) dehydrogenase 7                                     | Downregulated |
| A_22_P000 | 0.000486 | 6.73E-06  | -4.17 | lnc-ADAM19-  | lnc-ADAM19-1:1                                                               | Downregulated |
| A_33_P330 | 0.000739 | 0.0000392 | -4.17 | BRCC3        | BRCA1/BRCA2-containing complex, subunit 3                                    | Downregulated |
| A_33_P330 | 0.000483 | 5.13E-06  | -4.18 | PSMD5        | proteasome (prosome, macropain) 26S subunit, non-ATPase, 5                   | Downregulated |
| A_23_P119 | 0.000483 | 5.79E-06  | -4.18 | KLF2         | Kruppel-like factor 2                                                        | Downregulated |
| A_24_P245 | 0.000485 | 6.54E-06  | -4.18 | TNFSF12      | tumor necrosis factor (ligand) superfamily, member 12                        | Downregulated |
| A_23_P164 | 0.000526 | 0.0000118 | -4.18 | CDC34        | cell division cycle 34                                                       | Downregulated |
| A_33_P333 | 0.000526 | 0.0000124 | -4.18 | ALDH3A2      | aldehyde dehydrogenase 3 family, member A2                                   | Downregulated |
| A_33_P341 | 0.000578 | 0.0000192 | -4.18 | DGCR11       | DiGeorge syndrome critical region gene 11 (non-protein coding)               | Downregulated |
| A_21_P000 | 0.000584 | 0.000002  | -4.18 | LOC1002870   | uncharacterized LOC100287036                                                 | Downregulated |
| A_19_P008 | 0.000516 | 0.0000101 | -4.19 | TAPT1-AS1    | TAPT1 antisense RNA 1 (head to head)                                         | Downregulated |
| A_23_P937 | 0.000765 | 0.0000424 | -4.19 | PMS2         | PMS2 postmeiotic segregation increased 2 (S. cerevisiae)                     | Downregulated |
| A_23_P250 | 0.00129  | 0.000136  | -4.19 | HSD17B6      | hydroxysteroid (17-beta) dehydrogenase 6                                     | Downregulated |
| A_23_P217 | 0.000486 | 6.89E-06  | -4.2  | CCNL2        | cyclin L2                                                                    | Downregulated |
| A_22_P000 | 0.000525 | 0.0000114 | -4.2  | LOC1020313   | uncharacterized LOC102031319                                                 | Downregulated |

|           |          |           |       |                 |                                                             |               |
|-----------|----------|-----------|-------|-----------------|-------------------------------------------------------------|---------------|
| A_23_P612 | 0.000483 | 4.11E-06  | -4.21 | HGH1            | HGH1 homolog (S. cerevisiae)                                | Downregulated |
| A_33_P344 | 0.000498 | 7.77E-06  | -4.21 | LOC389641       | uncharacterized LOC389641                                   | Downregulated |
| A_24_P297 | 0.001702 | 0.000227  | -4.21 | CDK14           | cyclin-dependent kinase 14                                  | Downregulated |
| A_23_P112 | 0.003387 | 0.000683  | -4.22 | DGAT1           | diacylglycerol O-acyltransferase 1                          | Downregulated |
| A_24_P696 | 0.000501 | 8.22E-06  | -4.23 | ZNF25           | zinc finger protein 25                                      | Downregulated |
| A_23_P584 | 0.000578 | 0.0000191 | -4.23 | ANKHD1-EIF4EBP3 | ANKHD1-EIF4EBP3 readthrough                                 | Downregulated |
| A_21_P000 | 0.000578 | 0.0000191 | -4.23 | lnc-CHD1L-1     | lnc-CHD1L-1:3                                               | Downregulated |
| A_32_P214 | 0.00072  | 0.0000372 | -4.23 | lnc-AKIRIN1-1   | lnc-AKIRIN1-1:2                                             | Downregulated |
| A_32_P119 | 0.00056  | 0.0000161 | -4.24 | TPM3            | tropomyosin 3                                               | Downregulated |
| A_23_P169 | 0.000909 | 0.000063  | -4.24 | DGKI            | diacylglycerol kinase, iota                                 | Downregulated |
| A_23_P441 | 0.001141 | 0.000108  | -4.24 | DCXR            | dicarbonyl/L-xylulose reductase                             | Downregulated |
| A_23_P152 | 0.000483 | 2.64E-06  | -4.25 | NUP88           | nucleoporin 88kDa                                           | Downregulated |
| A_33_P320 | 0.000515 | 9.83E-06  | -4.25 | WDFY2           | WD repeat and FYVE domain containing 2                      | Downregulated |
| A_23_P211 | 0.000498 | 7.96E-06  | -4.26 | SETD4           | SET domain containing 4                                     | Downregulated |
| A_21_P001 | 0.000511 | 8.77E-06  | -4.27 | LOC1027251      | uncharacterized LOC102725134                                | Downregulated |
| A_23_P419 | 0.000718 | 0.0000368 | -4.27 | KIAA1407        | KIAA1407                                                    | Downregulated |
| A_33_P324 | 0.000801 | 0.0000478 | -4.27 | KIF13B          | kinesin family member 13B                                   | Downregulated |
| A_23_P653 | 0.000483 | 3.05E-06  | -4.28 | SYNJ2BP         | synaptojanin 2 binding protein                              | Downregulated |
| A_22_P000 | 0.000521 | 0.0000104 | -4.28 | lnc-CAST-2      | lnc-CAST-2:1                                                | Downregulated |
| A_32_P159 | 0.000541 | 0.0000144 | -4.28 | KAT2B           | K(lysine) acetyltransferase 2B                              | Downregulated |
| A_23_P105 | 0.000585 | 0.0000201 | -4.28 | HRASLS2         | HRAS-like suppressor 2                                      | Downregulated |
| A_24_P749 | 0.003099 | 0.000598  | -4.28 | KDM1A           | lysine (K)-specific demethylase 1A                          | Downregulated |
| A_22_P000 | 0.001734 | 0.000233  | -4.29 | lnc-CERK-1      | lnc-CERK-1:1                                                | Downregulated |
| A_33_P337 | 0.000483 | 2.36E-06  | -4.3  | ABCC10          | ATP-binding cassette, sub-family C (CFTR/MRP), member 10    | Downregulated |
| A_21_P001 | 0.001602 | 0.000201  | -4.3  | NUBP1           | nucleotide binding protein 1                                | Downregulated |
| A_22_P000 | 0.000483 | 4.11E-06  | -4.31 | lnc-TFEC-2      | lnc-TFEC-2:4                                                | Downregulated |
| A_33_P334 | 0.000521 | 0.0000102 | -4.31 | UBE4B           | ubiquitination factor E4B                                   | Downregulated |
| A_23_P890 | 0.000525 | 0.0000114 | -4.33 | C16orf95        | chromosome 16 open reading frame 95                         | Downregulated |
| A_24_P244 | 0.000532 | 0.0000134 | -4.33 | NLRX1           | NLR family member X1                                        | Downregulated |
| A_33_P335 | 0.00096  | 0.0000716 | -4.33 | CD99            | CD99 molecule                                               | Downregulated |
| A_23_P916 | 0.000501 | 8.18E-06  | -4.34 | EWSR1           | EWS RNA-binding protein 1                                   | Downregulated |
| A_33_P341 | 0.000494 | 7.53E-06  | -4.35 | ALS2            | amyotrophic lateral sclerosis 2 (juvenile)                  | Downregulated |
| A_24_P168 | 0.000521 | 0.0000107 | -4.35 | ZMYM3           | zinc finger, MYM-type 3                                     | Downregulated |
| A_23_P119 | 0.000532 | 0.0000133 | -4.35 | NUDT5           | nudix (nucleoside diphosphate linked moiety X)-type motif 5 | Downregulated |
| A_33_P328 | 0.000621 | 0.0000243 | -4.35 | FAM207A         | family with sequence similarity 207, member A               | Downregulated |
| A_22_P000 | 0.000486 | 0.000007  | -4.36 | lnc-SPINK9-1    | lnc-SPINK9-1:1                                              | Downregulated |
| A_21_P000 | 0.000605 | 0.0000226 | -4.36 | BTN2A1          | butyrophilin, subfamily 2, member A1                        | Downregulated |

|           |          |           |       |                |                                                       |               |
|-----------|----------|-----------|-------|----------------|-------------------------------------------------------|---------------|
| A_19_P003 | 0.001084 | 0.0000956 | -4.36 | PVT1           | Pvt1 oncogene (non-protein coding)                    | Downregulated |
| A_21_P001 | 0.000486 | 6.82E-06  | -4.37 | LOC1005074     | uncharacterized LOC100507412                          | Downregulated |
| A_21_P001 | 0.000483 | 3.33E-06  | -4.38 | XLOC_I2_006025 |                                                       | Downregulated |
| A_24_P627 | 0.001263 | 0.000132  | -4.38 | EDEM2          | ER degradation enhancer, mannosidase alpha-like 2     | Downregulated |
| A_33_P332 | 0.000525 | 0.000011  | -4.39 | ARID5B         | AT rich interactive domain 5B (MRF1-like)             | Downregulated |
| A_23_P110 | 0.000634 | 0.0000253 | -4.39 | NICN1          | nicolin 1                                             | Downregulated |
| A_23_P125 | 0.000939 | 0.000068  | -4.39 | RBM10          | RNA binding motif protein 10                          | Downregulated |
| A_22_P000 | 0.002949 | 0.000552  | -4.39 | LOC1019269     | uncharacterized LOC101926933                          | Downregulated |
| A_22_P000 | 0.000483 | 3.45E-06  | -4.4  | lnc-TM2D2-3    | lnc-TM2D2-3:1                                         | Downregulated |
| A_24_P681 | 0.000526 | 0.0000128 | -4.4  | HIPK2          | homeodomain interacting protein kinase 2              | Downregulated |
| A_23_P486 | 0.000928 | 0.0000656 | -4.4  | PYGL           | phosphorylase, glycogen, liver                        | Downregulated |
| A_22_P000 | 0.000483 | 5.95E-06  | -4.41 | ALG14          | ALG14, UDP-N-acetylglucosaminyltransferase subunit    | Downregulated |
| A_24_P181 | 0.000486 | 7.07E-06  | -4.41 | CATSPER2       | cation channel, sperm associated 2                    | Downregulated |
| A_24_P275 | 0.000743 | 0.0000398 | -4.41 | PGAP3          | post-GPI attachment to proteins 3                     | Downregulated |
| A_32_P105 | 0.000483 | 2.26E-06  | -4.42 | FTCDNL1        | formiminotransferase cyclodeaminase N-terminal like   | Downregulated |
| A_23_P678 | 0.000502 | 8.33E-06  | -4.42 | SCN3A          | sodium channel, voltage gated, type III alpha subunit | Downregulated |
| A_23_P840 | 0.000995 | 0.0000779 | -4.42 | CDK5           | cyclin-dependent kinase 5                             | Downregulated |
| A_23_P897 | 0.001297 | 0.000138  | -4.43 | CEP192         | centrosomal protein 192kDa                            | Downregulated |
| A_23_P157 | 0.000483 | 5.49E-06  | -4.44 | DDHD2          | DDHD domain containing 2                              | Downregulated |
| A_23_P160 | 0.000701 | 0.0000325 | -4.44 | AKT3           | v-akt murine thymoma viral oncogene homolog 3         | Downregulated |
| A_23_P254 | 0.003126 | 0.000607  | -4.44 | SGSH           | N-sulfoglucosamine sulfohydrolase                     | Downregulated |
| A_33_P331 | 0.00056  | 0.0000156 | -4.45 | CRACR2A        | calcium release activated channel regulator 2A        | Downregulated |
| A_33_P325 | 0.000483 | 6.04E-06  | -4.46 | JADE1          | jade family PHD finger 1                              | Downregulated |
| A_23_P124 | 0.000515 | 9.59E-06  | -4.47 | RGS14          | regulator of G-protein signaling 14                   | Downregulated |
| A_24_P145 | 0.000526 | 0.0000122 | -4.47 | ZNF609         | zinc finger protein 609                               | Downregulated |
| A_32_P121 | 0.00067  | 0.0000287 | -4.49 | ANAPC1         | anaphase promoting complex subunit 1                  | Downregulated |
| A_23_P470 | 0.000711 | 0.0000355 | -4.49 | HHEX           | hematopoietically expressed homeobox                  | Downregulated |
| A_22_P000 | 0.000991 | 0.0000772 | -4.5  | lnc-HSP90AA    | lnc-HSP90AA1-4:1                                      | Downregulated |
| A_24_P945 | 0.00221  | 0.000356  | -4.5  | CHMP3          | charged multivesicular body protein 3                 | Downregulated |
| A_22_P000 | 0.000483 | 2.04E-06  | -4.51 | lnc-NT5E-1     | lnc-NT5E-1:1                                          | Downregulated |
| A_21_P000 | 0.000584 | 0.00002   | -4.51 | SNORD35B       | small nucleolar RNA, C/D box 35B                      | Downregulated |
| A_21_P000 | 0.000609 | 0.000023  | -4.51 | SNORD56B       | small nucleolar RNA, C/D box 56B                      | Downregulated |
| A_21_P000 | 0.001021 | 0.0000831 | -4.51 | LOC115110      | uncharacterized LOC115110                             | Downregulated |
| A_33_P339 | 0.000483 | 2.17E-06  | -4.52 | BET1           | Bet1 golgi vesicular membrane trafficking protein     | Downregulated |
| A_24_P106 | 0.000483 | 1.65E-06  | -4.53 | PKD2           | polycystic kidney disease 2 (autosomal dominant)      | Downregulated |
| A_23_P590 | 0.000498 | 7.86E-06  | -4.53 | TRERF1         | transcriptional regulating factor 1                   | Downregulated |
| A_23_P246 | 0.000707 | 0.0000344 | -4.53 | ELP4           | elongator acetyltransferase complex subunit 4         | Downregulated |

|           |          |           |       |              |                                                                    |               |
|-----------|----------|-----------|-------|--------------|--------------------------------------------------------------------|---------------|
| A_33_P329 | 0.000523 | 0.0000109 | -4.54 | ZBTB20       | zinc finger and BTB domain containing 20                           | Downregulated |
| A_33_P337 | 0.000537 | 0.0000141 | -4.54 | OSTN         | ostecrocin                                                         | Downregulated |
| A_23_P319 | 0.000483 | 1.63E-06  | -4.55 | FAM118B      | family with sequence similarity 118, member B                      | Downregulated |
| A_33_P336 | 0.000532 | 0.0000133 | -4.55 | PHF8         | PHD finger protein 8                                               | Downregulated |
| A_24_P232 | 0.000577 | 0.0000184 | -4.56 | GRAMD4       | GRAM domain containing 4                                           | Downregulated |
| A_33_P328 | 0.002167 | 0.000346  | -4.56 | TSC2         | tuberous sclerosis 2                                               | Downregulated |
| A_23_P413 | 0.000483 | 6.35E-06  | -4.57 | SH3TC1       | SH3 domain and tetratricopeptide repeats 1                         | Downregulated |
| A_23_P249 | 0.000664 | 0.0000282 | -4.57 | TSPAN31      | tetraspanin 31                                                     | Downregulated |
| A_23_P156 | 0.000728 | 0.000038  | -4.57 | GZMK         | granzyme K (granzyme 3; tryptase II)                               | Downregulated |
| A_33_P332 | 0.000999 | 0.00008   | -4.57 | MOSPD3       | motile sperm domain containing 3                                   | Downregulated |
| A_23_P386 | 0.00093  | 0.0000662 | -4.6  | INAFM1       | InaF-motif containing 1                                            | Downregulated |
| A_22_P000 | 0.002169 | 0.000347  | -4.6  | lnc-NKX6-3-1 | lnc-NKX6-3-1:1                                                     | Downregulated |
| A_33_P333 | 0.000513 | 9.05E-06  | -4.61 | LOC728392    | uncharacterized LOC728392                                          | Downregulated |
| A_33_P330 | 0.000532 | 0.0000133 | -4.61 | LAMA4        | laminin, alpha 4                                                   | Downregulated |
| A_22_P000 | 0.000999 | 0.00008   | -4.61 | lnc-GGCT-1   | lnc-GGCT-1:4                                                       | Downregulated |
| A_23_P140 | 0.000483 | 1.54E-06  | -4.62 | EVL          | Enah/Vasp-like                                                     | Downregulated |
| A_21_P001 | 0.000773 | 0.0000434 | -4.62 | ULK4P3       | ULK4 pseudogene 3                                                  | Downregulated |
| A_33_P335 | 0.000513 | 8.85E-06  | -4.63 | TANGO6       | transport and golgi organization 6 homolog (Drosophila)            | Downregulated |
| A_33_P336 | 0.000483 | 5.48E-06  | -4.64 | ICAM4        | intercellular adhesion molecule 4 (Landsteiner-Wiener blood group) | Downregulated |
| A_33_P335 | 0.00056  | 0.000016  | -4.65 | PATL2        | protein associated with topoisomerase II homolog 2 (yeast)         | Downregulated |
| A_33_P338 | 0.000483 | 6.08E-06  | -4.66 | BCAS3        | breast carcinoma amplified sequence 3                              | Downregulated |
| A_21_P001 | 0.000578 | 0.0000192 | -4.66 | LOC1005071   | uncharacterized LOC100507195                                       | Downregulated |
| A_23_P243 | 0.000489 | 7.39E-06  | -4.67 | CCDC88B      | coiled-coil domain containing 88B                                  | Downregulated |
| A_33_P331 | 0.000483 | 6.35E-06  | -4.68 | RAB37        | RAB37, member RAS oncogene family                                  | Downregulated |
| A_23_P404 | 0.000939 | 0.0000679 | -4.68 | BIK          | BCL2-interacting killer (apoptosis-inducing)                       | Downregulated |
| A_19_P003 | 0.000485 | 6.49E-06  | -4.69 | LINC00673    | long intergenic non-protein coding RNA 673                         | Downregulated |
| A_21_P000 | 0.000639 | 0.0000257 | -4.69 | OVAAL        | ovarian adenocarcinoma amplified long non-coding RNA               | Downregulated |
| A_23_P126 | 0.000483 | 3.81E-06  | -4.7  | ANGPTL1      | angiopoietin-like 1                                                | Downregulated |
| A_33_P334 | 0.000501 | 8.13E-06  | -4.7  | CALHM2       | calcium homeostasis modulator 2                                    | Downregulated |
| A_21_P000 | 0.000515 | 9.58E-06  | -4.7  | SNORD12B     | small nucleolar RNA, C/D box 12B                                   | Downregulated |
| A_23_P121 | 0.000577 | 0.0000183 | -4.7  | TNFSF10      | tumor necrosis factor (ligand) superfamily, member 10              | Downregulated |
| A_33_P334 | 0.000695 | 0.0000311 | -4.7  | TTL1         | tubulin tyrosine ligase-like family member 1                       | Downregulated |
| A_23_P352 | 0.000964 | 0.000073  | -4.7  | DCAF5        | DDB1 and CUL4 associated factor 5                                  | Downregulated |
| A_19_P008 | 0.000486 | 6.75E-06  | -4.72 | lnc-RPRML-3  | lnc-RPRML-3:2                                                      | Downregulated |
| A_23_P822 | 0.000571 | 0.0000173 | -4.72 | GNB2         | guanine nucleotide binding protein (G protein), beta polypeptide 2 | Downregulated |
| A_33_P338 | 0.001071 | 0.0000938 | -4.72 | DHX30        | DEAH (Asp-Glu-Ala-His) box helicase 30                             | Downregulated |
| A_23_P150 | 0.000483 | 2.46E-06  | -4.73 | ESYT1        | extended synaptotagmin-like protein 1                              | Downregulated |

|           |          |           |       |            |                                                                    |               |
|-----------|----------|-----------|-------|------------|--------------------------------------------------------------------|---------------|
| A_23_P208 | 0.000483 | 5.49E-06  | -4.73 | AXL        | AXL receptor tyrosine kinase                                       | Downregulated |
| A_22_P000 | 0.000483 | 5.51E-06  | -4.73 | LOC1019289 | uncharacterized LOC101928915                                       | Downregulated |
| A_23_P386 | 0.000683 | 0.0000299 | -4.74 | C4orf26    | chromosome 4 open reading frame 26                                 | Downregulated |
| A_23_P348 | 0.000526 | 0.0000118 | -4.75 | AK9        | adenylate kinase 9                                                 | Downregulated |
| A_23_P864 | 0.000483 | 4.24E-06  | -4.77 | CH25H      | cholesterol 25-hydroxylase                                         | Downregulated |
| A_23_P210 | 0.001158 | 0.000111  | -4.77 | ELMO2      | engulfment and cell motility 2                                     | Downregulated |
| A_33_P329 | 0.002479 | 0.000423  | -4.77 | ZXDC       | ZXD family zinc finger C                                           | Downregulated |
| A_22_P000 | 0.000525 | 0.0000114 | -4.79 | LINC00421  | long intergenic non-protein coding RNA 421                         | Downregulated |
| A_33_P349 | 0.000625 | 0.0000246 | -4.79 | CCDC141    | coiled-coil domain containing 141                                  | Downregulated |
| A_23_P101 | 0.000792 | 0.0000463 | -4.79 | KRI1       | KRI1 homolog ( <i>S. cerevisiae</i> )                              | Downregulated |
| A_23_P264 | 0.000938 | 0.0000672 | -4.79 | HBA2       | hemoglobin, alpha 2                                                | Downregulated |
| A_23_P551 | 0.000483 | 4.09E-06  | -4.8  | COX10      | COX10 heme A:farnesyltransferase cytochrome c oxidase assembly fac | Downregulated |
| A_33_P322 | 0.000483 | 0.0000054 | -4.8  | SLC16A4    | solute carrier family 16, member 4                                 | Downregulated |
| A_23_P257 | 0.000483 | 5.94E-06  | -4.81 | ALG14      | ALG14, UDP-N-acetylglucosaminyltransferase subunit                 | Downregulated |
| A_24_P135 | 0.000483 | 5.99E-06  | -4.81 | TSPAN14    | tetraspanin 14                                                     | Downregulated |
| A_33_P325 | 0.00056  | 0.0000158 | -4.81 | PLIN2      | perilipin 2                                                        | Downregulated |
| A_23_P215 | 0.000582 | 0.0000198 | -4.81 | ABCF2      | ATP-binding cassette, sub-family F (GCN20), member 2               | Downregulated |
| A_22_P000 | 0.000483 | 5.24E-06  | -4.82 | lnc-HYI-1  | lnc-HYI-1:1                                                        | Downregulated |
| A_23_P146 | 0.00064  | 0.0000259 | -4.82 | RNF170     | ring finger protein 170                                            | Downregulated |
| A_23_P209 | 0.000697 | 0.0000321 | -4.82 | TRIM68     | tripartite motif containing 68                                     | Downregulated |
| A_33_P336 | 0.000483 | 4.43E-06  | -4.85 | UBA5       | ubiquitin-like modifier activating enzyme 5                        | Downregulated |
| A_24_P854 | 0.000486 | 7.03E-06  | -4.86 | MIAT       | myocardial infarction associated transcript (non-protein coding)   | Downregulated |
| A_32_P135 | 0.000515 | 9.62E-06  | -4.86 | RBM41      | RNA binding motif protein 41                                       | Downregulated |
| A_24_P683 | 0.000532 | 0.0000132 | -4.86 | SYNE2      | spectrin repeat containing, nuclear envelope 2                     | Downregulated |
| A_33_P325 | 0.000483 | 1.83E-06  | -4.87 | HBA2       | hemoglobin, alpha 2                                                | Downregulated |
| A_23_P137 | 0.000483 | 3.02E-06  | -4.87 | S100A10    | S100 calcium binding protein A10                                   | Downregulated |
| A_19_P003 | 0.000504 | 8.51E-06  | -4.87 | KIF9-AS1   | KIF9 antisense RNA 1                                               | Downregulated |
| A_33_P340 | 0.000537 | 0.0000139 | -4.87 | LRRC8C     | leucine rich repeat containing 8 family, member C                  | Downregulated |
| A_22_P000 | 0.000608 | 0.000023  | -4.87 | ZNRD1-AS1  | ZNRD1 antisense RNA 1                                              | Downregulated |
| A_33_P336 | 0.002733 | 0.000492  | -4.87 | C6orf57    | chromosome 6 open reading frame 57                                 | Downregulated |
| A_21_P000 | 0.000483 | 3.86E-06  | -4.9  | LOC1027239 | uncharacterized LOC102723931                                       | Downregulated |
| A_23_P300 | 0.000709 | 0.000035  | -4.9  | SMCR8      | Smith-Magenis syndrome chromosome region, candidate 8              | Downregulated |
| A_24_P380 | 0.000486 | 6.98E-06  | -4.91 | SAPCD1     | suppressor APC domain containing 1                                 | Downregulated |
| A_23_P109 | 0.00124  | 0.000127  | -4.91 | THAP7      | THAP domain containing 7                                           | Downregulated |
| A_23_P345 | 0.000483 | 3.95E-06  | -4.92 | EPHX1      | epoxide hydrolase 1, microsomal (xenobiotic)                       | Downregulated |
| A_24_P288 | 0.000483 | 4.55E-06  | -4.92 | DPP9       | dipeptidyl-peptidase 9                                             | Downregulated |
| A_24_P383 | 0.002102 | 0.000327  | -4.92 | C19orf70   | chromosome 19 open reading frame 70                                | Downregulated |

|           |          |           |       |                |                                                                                   |               |
|-----------|----------|-----------|-------|----------------|-----------------------------------------------------------------------------------|---------------|
| A_33_P326 | 0.000622 | 0.0000244 | -4.93 | EFCAB3         | EF-hand calcium binding domain 3                                                  | Downregulated |
| A_33_P341 | 0.002853 | 0.000525  | -4.93 | CCDC124        | coiled-coil domain containing 124                                                 | Downregulated |
| A_32_P158 | 0.000525 | 0.0000111 | -4.94 | KLRF1          | killer cell lectin-like receptor subfamily F, member 1                            | Downregulated |
| A_22_P000 | 0.001364 | 0.000151  | -4.96 | lnc-DKK4-1     | lnc-DKK4-1:1                                                                      | Downregulated |
| A_33_P335 | 0.00056  | 0.0000156 | -4.97 | CLOCK          | clock circadian regulator                                                         | Downregulated |
| A_21_P001 | 0.000483 | 1.18E-06  | -4.99 | XLOC_I2_010405 |                                                                                   | Downregulated |
| A_21_P000 | 0.000483 | 1.98E-06  | -5.01 | SNORD74        | small nucleolar RNA, C/D box 74                                                   | Downregulated |
| A_21_P001 | 0.000483 | 5.13E-06  | -5.01 | LOC1019273     | uncharacterized LOC101927365                                                      | Downregulated |
| A_23_P216 | 0.000578 | 0.0000193 | -5.01 | MAPKAP1        | mitogen-activated protein kinase associated protein 1                             | Downregulated |
| A_33_P339 | 0.000596 | 0.0000211 | -5.01 | POLR3G         | polymerase (RNA) III (DNA directed) polypeptide G (32kD)                          | Downregulated |
| A_22_P000 | 0.000483 | 6.16E-06  | -5.02 | lnc-HNMT-2     | lnc-HNMT-2:1                                                                      | Downregulated |
| A_33_P322 | 0.001069 | 0.0000934 | -5.02 | SLC4A8         | solute carrier family 4, sodium bicarbonate cotransporter, member 8               | Downregulated |
| A_21_P000 | 0.000525 | 0.0000109 | -5.03 | lnc-GPR183-2   | lnc-GPR183-2:3                                                                    | Downregulated |
| A_23_P387 | 0.000766 | 0.0000426 | -5.04 | ZBTB40         | zinc finger and BTB domain containing 40                                          | Downregulated |
| A_22_P000 | 0.000589 | 0.0000206 | -5.06 | lnc-NSMCE1-1   | lnc-NSMCE1-1:1                                                                    | Downregulated |
| A_23_P666 | 0.002262 | 0.000371  | -5.07 | HOXB6          | homeobox B6                                                                       | Downregulated |
| A_24_P228 | 0.000589 | 0.0000205 | -5.08 | ARHGEF6        | Rac/Cdc42 guanine nucleotide exchange factor (GEF) 6                              | Downregulated |
| A_33_P342 | 0.001141 | 0.000108  | -5.08 | TTL            | tubulin tyrosine ligase                                                           | Downregulated |
| A_22_P000 | 0.002113 | 0.00033   | -5.08 | LOC1019284     | uncharacterized LOC101928461                                                      | Downregulated |
| A_23_P105 | 0.000603 | 0.0000225 | -5.09 | GPRC5D         | G protein-coupled receptor, class C, group 5, member D                            | Downregulated |
| A_33_P337 | 0.000515 | 9.33E-06  | -5.1  | SLC9A3R1       | solute carrier family 9, subfamily A (NHE3, cation proton antiporter 3), member 1 | Downregulated |
| A_23_P647 | 0.000611 | 0.0000232 | -5.1  | ZNF641         | zinc finger protein 641                                                           | Downregulated |
| A_23_P482 | 0.000743 | 0.0000397 | -5.13 | APOLD1         | apolipoprotein L domain containing 1                                              | Downregulated |
| A_33_P335 | 0.002043 | 0.000312  | -5.13 | LOC728903      | uncharacterized LOC728903                                                         | Downregulated |
| A_23_P874 | 0.00102  | 0.000083  | -5.17 | APOF           | apolipoprotein F                                                                  | Downregulated |
| A_23_P785 | 0.000515 | 9.91E-06  | -5.18 | CEACAM21       | carcinoembryonic antigen-related cell adhesion molecule 21                        | Downregulated |
| A_23_P359 | 0.000483 | 4.25E-06  | -5.19 | PDDC1          | Parkinson disease 7 domain containing 1                                           | Downregulated |
| A_24_P941 | 0.000483 | 4.73E-06  | -5.19 | FAM65B         | family with sequence similarity 65, member B                                      | Downregulated |
| A_22_P000 | 0.002012 | 0.000304  | -5.19 | lnc-PLEKHA3    | lnc-PLEKHA3-4:1                                                                   | Downregulated |
| A_23_P667 | 0.000483 | 4.03E-06  | -5.2  | DHRS13         | dehydrogenase/reductase (SDR family) member 13                                    | Downregulated |
| A_22_P000 | 0.000575 | 0.0000177 | -5.2  | lnc-MKRN2-A    | lnc-MKRN2-AS1-1:1                                                                 | Downregulated |
| A_23_P388 | 0.000483 | 3.47E-06  | -5.21 | KAT6B          | K(lysine) acetyltransferase 6B                                                    | Downregulated |
| A_22_P000 | 0.00155  | 0.000191  | -5.22 | LOC1019273     | uncharacterized LOC101927391                                                      | Downregulated |
| A_22_P000 | 0.000483 | 4.16E-06  | -5.23 | LOC1019296     | uncharacterized LOC101929648                                                      | Downregulated |
| A_33_P330 | 0.000526 | 0.0000119 | -5.23 | BLOC1S5        | biogenesis of lysosomal organelles complex-1, subunit 5, muted                    | Downregulated |
| A_23_P122 | 0.000693 | 0.000031  | -5.23 | C6orf47        | chromosome 6 open reading frame 47                                                | Downregulated |
| A_21_P001 | 0.001404 | 0.00016   | -5.23 | MIR4435-1HC    | MIR4435-1 host gene (non-protein coding)                                          | Downregulated |



|           |          |           |       |              |                                                                           |               |
|-----------|----------|-----------|-------|--------------|---------------------------------------------------------------------------|---------------|
| A_22_P000 | 0.002369 | 0.000396  | -5.23 | SNRPD1       | small nuclear ribonucleoprotein D1 polypeptide 16kDa                      | Downregulated |
| A_24_P174 | 0.000537 | 0.0000142 | -5.24 | TTC30A       | tetratricopeptide repeat domain 30A                                       | Downregulated |
| A_23_P720 | 0.001626 | 0.000208  | -5.24 | SLC25A20     | solute carrier family 25 (carnitine/acylcarnitine translocase), member 20 | Downregulated |
| A_23_P152 | 0.001751 | 0.000236  | -5.25 | RMDN3        | regulator of microtubule dynamics 3                                       | Downregulated |
| A_23_P330 | 0.000605 | 0.0000227 | -5.26 | PIP5K1C      | phosphatidylinositol-4-phosphate 5-kinase, type I, gamma                  | Downregulated |
| A_24_P337 | 0.000483 | 5.26E-06  | -5.27 | TTC7A        | tetratricopeptide repeat domain 7A                                        | Downregulated |
| A_23_P329 | 0.001108 | 0.000101  | -5.28 | DPH7         | diphthamide biosynthesis 7                                                | Downregulated |
| A_23_P537 | 0.000483 | 5.54E-06  | -5.3  | CLSTN3       | calsyntenin 3                                                             | Downregulated |
| A_33_P324 | 0.000526 | 0.0000116 | -5.3  | ACSM6        | acyl-CoA synthetase medium-chain family member 6                          | Downregulated |
| A_21_P000 | 0.000883 | 0.0000591 | -5.32 | LINC00944    | long intergenic non-protein coding RNA 944                                | Downregulated |
| A_23_P592 | 0.000483 | 3.52E-06  | -5.34 | TAF11        | TAF11 RNA polymerase II, TATA box binding protein (TBP)-associated 1      | Downregulated |
| A_24_P272 | 0.000486 | 6.85E-06  | -5.34 | ASH1L-AS1    | ASH1L antisense RNA 1                                                     | Downregulated |
| A_22_P000 | 0.000483 | 4.05E-06  | -5.35 | lnc-RP11-467 | lnc-RP11-467M13.1.1-3:1                                                   | Downregulated |
| A_33_P334 | 0.000483 | 3.51E-06  | -5.37 | LCLAT1       | lysocardiolipin acyltransferase 1                                         | Downregulated |
| A_33_P341 | 0.000483 | 3.58E-06  | -5.37 | MEN1         | multiple endocrine neoplasia 1                                            | Downregulated |
| A_23_P430 | 0.000621 | 0.0000242 | -5.37 | LYSMD1       | LysM, putative peptidoglycan-binding, domain containing 1                 | Downregulated |
| A_21_P000 | 0.000483 | 4.37E-06  | -5.38 | LOC1005071   | uncharacterized LOC100507195                                              | Downregulated |
| A_33_P338 | 0.000949 | 0.0000698 | -5.38 | ABLIM1       | actin binding LIM protein 1                                               | Downregulated |
| A_23_P490 | 0.001301 | 0.000139  | -5.39 | LPCAT4       | lysophosphatidylcholine acyltransferase 4                                 | Downregulated |
| A_23_P308 | 0.000483 | 5.01E-06  | -5.41 | AMER1        | APC membrane recruitment protein 1                                        | Downregulated |
| A_33_P337 | 0.000599 | 0.0000215 | -5.44 | SOCS2-AS1    | SOCS2 antisense RNA 1                                                     | Downregulated |
| A_33_P338 | 0.000483 | 0.0000034 | -5.45 | STK10        | serine/threonine kinase 10                                                | Downregulated |
| A_23_P656 | 0.000483 | 3.93E-06  | -5.46 | SPG11        | spastic paraplegia 11 (autosomal recessive)                               | Downregulated |
| A_23_P356 | 0.000483 | 0.0000061 | -5.46 | ZNF451       | zinc finger protein 451                                                   | Downregulated |
| A_23_P397 | 0.001453 | 0.00017   | -5.46 | TIRAP        | toll-interleukin 1 receptor (TIR) domain containing adaptor protein       | Downregulated |
| A_33_P342 | 0.000483 | 0.0000025 | -5.47 | CRELD1       | cysteine-rich with EGF-like domains 1                                     | Downregulated |
| A_22_P000 | 0.000893 | 0.0000604 | -5.47 | LOC1019273   | uncharacterized LOC101927355                                              | Downregulated |
| A_22_P000 | 0.000483 | 0.0000044 | -5.49 | lnc-ANKRD42  | lnc-ANKRD42-1:1                                                           | Downregulated |
| A_24_P119 | 0.000483 | 8.34E-07  | -5.5  | ITPKB        | inositol-trisphosphate 3-kinase B                                         | Downregulated |
| A_33_P339 | 0.000483 | 0.0000032 | -5.5  | C20orf27     | chromosome 20 open reading frame 27                                       | Downregulated |
| A_23_P214 | 0.000483 | 5.53E-06  | -5.51 | GPR63        | G protein-coupled receptor 63                                             | Downregulated |
| A_21_P000 | 0.000483 | 0.0000033 | -5.52 | LOC389641    | uncharacterized LOC389641                                                 | Downregulated |
| A_23_P136 | 0.000483 | 1.01E-06  | -5.53 | AP3B1        | adaptor-related protein complex 3, beta 1 subunit                         | Downregulated |
| A_23_P393 | 0.000483 | 0.0000048 | -5.54 | INPP4A       | inositol polyphosphate-4-phosphatase, type I, 107kDa                      | Downregulated |
| A_33_P337 | 0.000483 | 5.03E-06  | -5.54 | SZT2         | seizure threshold 2 homolog (mouse)                                       | Downregulated |
| A_24_P916 | 0.00055  | 0.000015  | -5.54 | PRKCA        | protein kinase C, alpha                                                   | Downregulated |
| A_22_P000 | 0.000483 | 2.63E-06  | -5.55 | LOC728730    | uncharacterized LOC728730                                                 | Downregulated |

|           |          |           |       |              |                                                                  |               |
|-----------|----------|-----------|-------|--------------|------------------------------------------------------------------|---------------|
| A_33_P330 | 0.000537 | 0.0000138 | -5.56 | RIPK3        | receptor-interacting serine-threonine kinase 3                   | Downregulated |
| A_24_P150 | 0.000597 | 0.0000214 | -5.56 | ZNF490       | zinc finger protein 490                                          | Downregulated |
| A_24_P222 | 0.000483 | 4.91E-06  | -5.58 | S100PBP      | S100P binding protein                                            | Downregulated |
| A_33_P338 | 0.000483 | 7.75E-07  | -5.59 | ATP6V1C1     | ATPase, H+ transporting, lysosomal 42kDa, V1 subunit C1          | Downregulated |
| A_23_P203 | 0.000483 | 4.16E-06  | -5.61 | IMMP1L       | IMP1 inner mitochondrial membrane peptidase-like (S. cerevisiae) | Downregulated |
| A_23_P347 | 0.001698 | 0.000225  | -5.65 | KIF2C        | kinesin family member 2C                                         | Downregulated |
| A_33_P339 | 0.000483 | 5.46E-06  | -5.68 | CMTR1        | cap methyltransferase 1                                          | Downregulated |
| A_23_P338 | 0.000483 | 1.92E-06  | -5.73 | S100PBP      | S100P binding protein                                            | Downregulated |
| A_23_P377 | 0.000483 | 0.0000028 | -5.73 | HEXIM2       | hexamethylene bis-acetamide inducible 2                          | Downregulated |
| A_22_P000 | 0.000537 | 0.0000139 | -5.74 | lnc-RP11-712 | lnc-RP11-712L6.5.1-1:1                                           | Downregulated |
| A_21_P000 | 0.000483 | 3.11E-06  | -5.8  | lnc-BOD1-1   | lnc-BOD1-1:3                                                     | Downregulated |
| A_33_P342 | 0.000563 | 0.0000167 | -5.8  | LOC1001292   | uncharacterized LOC100129275                                     | Downregulated |
| A_23_P200 | 0.000483 | 7.38E-07  | -5.82 | AGL          | amylo-alpha-1, 6-glucosidase, 4-alpha-glucanotransferase         | Downregulated |
| A_23_P348 | 0.000483 | 4.17E-06  | -5.83 | LETM2        | leucine zipper-EF-hand containing transmembrane protein 2        | Downregulated |
| A_32_P198 | 0.000526 | 0.0000124 | -5.83 | NEURL1B      | neuralized E3 ubiquitin protein ligase 1B                        | Downregulated |
| A_24_P108 | 0.000792 | 0.0000464 | -5.88 | GRAP2        | GRB2-related adaptor protein 2                                   | Downregulated |
| A_23_P256 | 0.000483 | 3.66E-06  | -5.89 | KIF20A       | kinesin family member 20A                                        | Downregulated |
| A_23_P163 | 0.000483 | 2.56E-06  | -5.91 | SCAPER       | S-phase cyclin A-associated protein in the ER                    | Downregulated |
| A_22_P000 | 0.000483 | 3.94E-06  | -5.92 | lnc-SFN-1    | lnc-SFN-1:1                                                      | Downregulated |
| A_23_P393 | 0.000525 | 0.0000111 | -5.93 | KLHL26       | kelch-like family member 26                                      | Downregulated |
| A_23_P979 | 0.000578 | 0.0000193 | -5.94 | MSRB2        | methionine sulfoxide reductase B2                                | Downregulated |
| A_23_P215 | 0.000483 | 3.81E-06  | -5.96 | VPS41        | vacuolar protein sorting 41 homolog (S. cerevisiae)              | Downregulated |
| A_23_P138 | 0.00055  | 0.0000151 | -6    | ATN1         | atrophin 1                                                       | Downregulated |
| A_32_P363 | 0.001243 | 0.000128  | -6    | VTI1A        | vesicle transport through interaction with t-SNAREs 1A           | Downregulated |
| A_22_P000 | 0.000483 | 3.21E-06  | -6.01 | LOC1005076   | uncharacterized LOC100507616                                     | Downregulated |
| A_23_P317 | 0.000483 | 7.23E-07  | -6.04 | BLK          | BLK proto-oncogene, Src family tyrosine kinase                   | Downregulated |
| A_23_P735 | 0.000483 | 5.85E-06  | -6.06 | CCDC120      | coiled-coil domain containing 120                                | Downregulated |
| A_33_P339 | 0.000483 | 0.0000014 | -6.1  | ZNF562       | zinc finger protein 562                                          | Downregulated |
| A_23_P422 | 0.000483 | 2.27E-06  | -6.1  | APOM         | apolipoprotein M                                                 | Downregulated |
| A_23_P206 | 0.000483 | 2.42E-06  | -6.11 | KIAA0513     | KIAA0513                                                         | Downregulated |
| A_23_P142 | 0.000483 | 3.12E-06  | -6.11 | ARHGAP25     | Rho GTPase activating protein 25                                 | Downregulated |
| A_33_P330 | 0.000483 | 3.51E-06  | -6.11 | RNF207       | ring finger protein 207                                          | Downregulated |
| A_23_P359 | 0.000483 | 3.55E-06  | -6.11 | KDM7A        | lysine (K)-specific demethylase 7A                               | Downregulated |
| A_23_P170 | 0.000518 | 0.0000101 | -6.12 | SMYD2        | SET and MYND domain containing 2                                 | Downregulated |
| A_33_P326 | 0.000483 | 2.61E-06  | -6.21 | HS2ST1       | heparan sulfate 2-O-sulfotransferase 1                           | Downregulated |
| A_23_P105 | 0.000483 | 2.86E-06  | -6.21 | BIVM         | basic, immunoglobulin-like variable motif containing             | Downregulated |
| A_33_P322 | 0.000483 | 0.0000045 | -6.27 | OAS2         | 2'-5'-oligoadenylate synthetase 2, 69/71kDa                      | Downregulated |

|           |          |           |       |              |                                                                           |               |
|-----------|----------|-----------|-------|--------------|---------------------------------------------------------------------------|---------------|
| A_23_P133 | 0.000483 | 2.79E-06  | -6.31 | HUS1B        | HUS1 checkpoint homolog b (S. pombe)                                      | Downregulated |
| A_24_P406 | 0.000483 | 2.08E-06  | -6.33 | FAM53B       | family with sequence similarity 53, member B                              | Downregulated |
| A_23_P468 | 0.000486 | 6.98E-06  | -6.34 | SLC29A3      | solute carrier family 29 (equilibrative nucleoside transporter), member 3 | Downregulated |
| A_33_P329 | 0.000549 | 0.0000149 | -6.35 | TSC22D1      | TSC22 domain family, member 1                                             | Downregulated |
| A_24_P382 | 0.000483 | 1.49E-06  | -6.36 | NHP2L1       | NHP2 non-histone chromosome protein 2-like 1 (S. cerevisiae)              | Downregulated |
| A_23_P489 | 0.000483 | 1.67E-06  | -6.36 | SMAD3        | SMAD family member 3                                                      | Downregulated |
| A_33_P322 | 0.000483 | 2.93E-06  | -6.36 | GSDMB        | gasdermin B                                                               | Downregulated |
| A_23_P109 | 0.000483 | 2.67E-06  | -6.37 | NR112        | nuclear receptor subfamily 1, group I, member 2                           | Downregulated |
| A_33_P341 | 0.000483 | 0.0000021 | -6.39 | LOC1001286   | uncharacterized LOC100128607                                              | Downregulated |
| A_23_P352 | 0.000483 | 1.98E-06  | -6.43 | NEK2         | NIMA-related kinase 2                                                     | Downregulated |
| A_33_P332 | 0.000483 | 1.36E-06  | -6.49 | ATP2B4       | ATPase, Ca <sup>++</sup> transporting, plasma membrane 4                  | Downregulated |
| A_24_P409 | 0.000501 | 0.0000082 | -6.52 | PPAPDC2      | phosphatidic acid phosphatase type 2 domain containing 2                  | Downregulated |
| A_33_P332 | 0.000483 | 1.74E-06  | -6.56 | SAMD12       | sterile alpha motif domain containing 12                                  | Downregulated |
| A_23_P552 | 0.000483 | 2.31E-06  | -6.61 | CCL18        | chemokine (C-C motif) ligand 18 (pulmonary and activation-regulated)      | Downregulated |
| A_23_P250 | 0.000998 | 0.0000798 | -6.62 | PARVG        | parvin, gamma                                                             | Downregulated |
| A_23_P328 | 0.000483 | 2.17E-06  | -6.66 | FHDC1        | FH2 domain containing 1                                                   | Downregulated |
| A_21_P000 | 0.000483 | 2.35E-06  | -6.66 | LYRM4        | LYR motif containing 4                                                    | Downregulated |
| A_23_P224 | 0.000483 | 1.53E-06  | -6.9  | GNL3L        | guanine nucleotide binding protein-like 3 (nucleolar)-like                | Downregulated |
| A_23_P322 | 0.000483 | 3.46E-07  | -6.98 | TET1         | tet methylcytosine dioxygenase 1                                          | Downregulated |
| A_23_P253 | 0.000483 | 1.93E-06  | -7.05 | ASCL1        | achaete-scute family bHLH transcription factor 1                          | Downregulated |
| A_23_P164 | 0.000483 | 3.32E-07  | -7.12 | MINK1        | misshapen-like kinase 1                                                   | Downregulated |
| A_21_P000 | 0.000483 | 0.0000029 | -7.17 | PDCD6        | programmed cell death 6                                                   | Downregulated |
| A_32_P126 | 0.000483 | 1.19E-06  | -7.21 | SLC38A9      | solute carrier family 38, member 9                                        | Downregulated |
| A_33_P330 | 0.000483 | 0.0000021 | -7.28 | PSMD5        | proteasome (prosome, macropain) 26S subunit, non-ATPase, 5                | Downregulated |
| A_24_P900 | 0.000912 | 0.0000634 | -7.3  | ADD3         | adducin 3 (gamma)                                                         | Downregulated |
| A_22_P000 | 0.000691 | 0.0000306 | -7.35 | lnc-FBXO31-1 | lnc-FBXO31-1:1                                                            | Downregulated |
| A_23_P145 | 0.000483 | 0.0000015 | -7.45 | ADRB2        | adrenoceptor beta 2, surface                                              | Downregulated |
| A_32_P226 | 0.000483 | 7.78E-07  | -7.69 | LOC1001297   | uncharacterized LOC100129781                                              | Downregulated |

Supplementary Table 2. Honokiol (HNK)-mediated proteins (HMPs)  
, as retrieved from Swiss target prediction, STITCH, canSAR Black, and SEA.

| SwissTargetPrediction                                         |             |
|---------------------------------------------------------------|-------------|
| Gene Name                                                     | Gene Symbol |
| Arachidonate 5-lipoxygenase                                   | ALOX5       |
| Cannabinoid receptor 1                                        | CNR1        |
| Cannabinoid receptor 2                                        | CNR2        |
| Carbonic anhydrase II                                         | CA2         |
| Calcium-activated potassium channel subunit alpha-1           | KCNMA1      |
| Monoamine oxidase B                                           | MAOB        |
| Vanilloid receptor                                            | TRPV1       |
| Pyruvate dehydrogenase kinase isoform 1                       | PDK1        |
| Catechol O-methyltransferase                                  | COMT        |
| Histone deacetylase 8                                         | HDAC8       |
| Cholesteryl ester transfer protein                            | CETP        |
| Heat shock protein HSP 90-alpha                               | HSP90AA1    |
| Quinone reductase 2                                           | NQO2        |
| Glucocorticoid receptor                                       | NR3C1       |
| Phospholipase A2 group IIA                                    | PLA2G2A     |
| Receptor protein-tyrosine kinase erbB-2                       | ERBB2       |
| Epidermal growth factor receptor erbB1                        | EGFR        |
| Heat shock protein HSP 90-beta                                | HSP90AB1    |
| Steryl-sulfatase                                              | STS         |
| GABA-A receptor; GABA-A site (alpha1/beta2 interface)         | GABRA1      |
| Poly [ADP-ribose] polymerase-1                                | PARP1       |
| Cytochrome b-c1 complex subunit 7                             | UQCRB       |
| Mu opioid receptor                                            | OPRM1       |
| Delta opioid receptor                                         | OPRD1       |
| Arachidonate 15-lipoxygenase                                  | ALOX15      |
| Epoxide hydratase                                             | EPHX2       |
| Histone deacetylase 6                                         | HDAC6       |
| Macrophage migration inhibitory factor                        | MIF         |
| MAP kinase p38 alpha                                          | MAPK14      |
| Anandamide amidohydrolase                                     | FAAH        |
| Acyl coenzyme A:cholesterol acyltransferase                   | CES1        |
| Dual-specificity tyrosine-phosphorylation regulated kinase 1A | DYRK1A      |
| Kinesin-like protein 1                                        | KIF11       |
| Glycogen synthase kinase-3 beta                               | GSK3B       |
| Glycogen synthase kinase-3 alpha                              | GSK3A       |
| Transthyretin                                                 | TTR         |
| Carbonic anhydrase I                                          | CA1         |
| Carbonic anhydrase IX                                         | CA9         |
| Serine/threonine-protein kinase PAK 1                         | PAK1        |
| 5-lipoxygenase activating protein                             | ALOX5AP     |
| Nitric-oxide synthase, brain                                  | NOS1        |

|                                                               |              |
|---------------------------------------------------------------|--------------|
| Dual specificity phosphatase Cdc25B                           | CDC25B       |
| Adenosine A2a receptor                                        | ADORA2A      |
| Serine/threonine-protein kinase Aurora-B                      | AURKB        |
| Tyrosine-protein kinase SRC                                   | SRC          |
| Focal adhesion kinase 1                                       | PTK2         |
| Vascular endothelial growth factor receptor 2                 | KDR          |
| Hepatocyte growth factor receptor                             | MET          |
| ALK tyrosine kinase receptor                                  | ALK          |
| Serine/threonine-protein kinase NEK6                          | NEK6         |
| Heat shock protein 75 kDa, mitochondrial                      | TRAP1        |
| NADPH oxidase 4                                               | NOX4         |
| NADPH oxidase 1                                               | NOX1         |
| Glutamate NMDA receptor; GRIN1/GRIN2B                         | GRIN1 GRIN2B |
| Bile acid receptor FXR                                        | NR1H4        |
| Matrix metalloproteinase 9                                    | MMP9         |
| Carbonic anhydrase XII                                        | CA12         |
| Matrix metalloproteinase 1                                    | MMP1         |
| Matrix metalloproteinase 2                                    | MMP2         |
| Protein kinase C gamma (by homology)                          | PRKCG        |
| Estradiol 17-beta-dehydrogenase 1                             | HSD17B1      |
| Serine/threonine-protein kinase B-raf                         | BRAF         |
| Prostanoid EP4 receptor                                       | PTGER4       |
| Monoglyceride lipase                                          | MGLL         |
| 11-beta-hydroxysteroid dehydrogenase 1                        | HSD11B1      |
| Cyclin-dependent kinase 2/cyclin E1                           | CCNE1 CDK2   |
| Tyrosine-protein kinase receptor FLT3                         | FLT3         |
| Phosphodiesterase 4B                                          | PDE4B        |
| Nischarin                                                     | NISCH        |
| NAD-dependent deacetylase sirtuin 2                           | SIRT2        |
| G-protein coupled bile acid receptor 1                        | GPBAR1       |
| Cytochrome P450 11B1                                          | CYP11B1      |
| Cytochrome P450 19A1                                          | CYP19A1      |
| Acetylcholinesterase                                          | ACHE         |
| Cytochrome P450 11B2                                          | CYP11B2      |
| Testis-specific androgen-binding protein                      | SHBG         |
| Dual specificity tyrosine-phosphorylation-regulated kinase 1B | DYRK1B       |
| Kinesin-1 heavy chain/ Tyrosine-protein kinase receptor RET   | RET          |
| Progesterone receptor                                         | PGR          |
| Histone deacetylase 1                                         | HDAC1        |
| Fibroblast growth factor receptor 1                           | FGFR1        |
| Macrophage colony stimulating factor receptor                 | CSF1R        |
| Serine/threonine-protein kinase PIM1                          | PIM1         |
| 3-phosphoinositide dependent protein kinase-1                 | PDPK1        |
| Cyclin-dependent kinase 2                                     | CDK2         |
| Prostaglandin E synthase                                      | PTGES        |
| Potassium-transporting ATPase                                 | ATP4B ATP4A  |
| Alpha-2a adrenergic receptor                                  | ADRA2A       |
| Uridine phosphorylase 1 (by homology)                         | UPP1         |

|                                                                    |         |
|--------------------------------------------------------------------|---------|
| Estradiol 17-beta-dehydrogenase 2                                  | HSD17B2 |
| Vascular endothelial growth factor receptor 1                      | FLT1    |
| Platelet-derived growth factor receptor beta                       | PDGFRB  |
| Stem cell growth factor receptor                                   | KIT     |
| Serine/threonine-protein kinase Sgk1                               | SGK1    |
| Dual specificity protein kinase CLK1                               | CLK1    |
| CDC7/DBF4 (Cell division cycle 7-related protein kinase/Activator) | CDC7    |
| Serine/threonine-protein kinase RAF                                | RAF1    |
| G-protein coupled receptor 84                                      | GPR84   |
| Tyrosinase                                                         | TYR     |
| Protein kinase C (PKC)                                             | PRKCZ   |

#### STITCH

|                                         |        |
|-----------------------------------------|--------|
| Peptidylprolyl Isomerase F              | PPIF   |
| Calpain 11                              | CAPN11 |
| ATP Binding Cassette Subfamily A        | ABCA   |
| Calpain 1                               | CAPN1  |
| Calpain 3                               | CAPN3  |
| Calpain 9                               | CAPN9  |
| BEN Domain Containing 3                 | BEND3  |
| Nitric Oxide Synthase 3                 | NOS3   |
| Vascular Endothelial Growth Factor A    | VEGFA  |
| Interleukin 4                           | IL4    |
| Caspase 3                               | CASP3  |
| Nitric Oxide Synthase 2                 | NOS2   |
| Cytochrome P450 2B6                     | CYP2B6 |
| Calpain 2                               | CAPN2  |
| Caspase 9                               | CASP9  |
| Caspase 8                               | CASP8  |
| CASP8 And FADD Like Apoptosis Regulator | CFLAR  |
| Cyclin D1                               | CCND1  |

#### CANSAR BLACK

|                                                        |        |
|--------------------------------------------------------|--------|
| Retinoid X Receptor Alpha                              | RXRA   |
| Gamma-Aminobutyric Acid Type A Receptor Subunit Beta2  | GABRB2 |
| Gamma-Aminobutyric Acid Type A Receptor Subunit Alpha5 | GABRA5 |
| Gamma-Aminobutyric Acid Type A Receptor Subunit Beta1  | GABRB1 |
| Gamma-Aminobutyric Acid Type A Receptor Subunit Alpha2 | GABRA2 |
| Gamma-Aminobutyric Acid Type A Receptor Subunit Alpha3 | GABRA3 |
| Gamma-Aminobutyric Acid Type A Receptor Subunit Beta3  | GABRB3 |
| Gamma-Aminobutyric Acid Type A Receptor Subunit Gamma  | GABRG2 |

#### SEA.BKSLAB.ORG

|                                       |       |
|---------------------------------------|-------|
| Prostaglandin-Endoperoxide Synthase 2 | PTGS2 |
| Prostaglandin-Endoperoxide Synthase 1 | PTGS1 |

Supplementary Table 3. KEGG pathway enrichment analysis of OGs from both HMP and DEGs.

| Term                                          | Count | %          | PValue     | Genes                                                               |
|-----------------------------------------------|-------|------------|------------|---------------------------------------------------------------------|
| hsa05200:Pathways in cancer                   | 9     | 33.3333333 | 1.11E-05   | PTGER4, CASP9, CSF1R, HSP90AA1, RXRA, HSP90AB1, CCND1, HDAC1, VEGFA |
| hsa04151:PI3K-Akt signaling pathway           | 8     | 29.6296296 | 4.74E-05   | CASP9, IL4, CSF1R, HSP90AA1, RXRA, HSP90AB1, CCND1, VEGFA           |
| hsa05215:Prostate cancer                      | 4     | 14.8148148 | 0.00227757 | CASP9, HSP90AA1, HSP90AB1, CCND1                                    |
| hsa04919:Thyroid hormone signaling pathway    | 4     | 14.8148148 | 0.00486019 | CASP9, RXRA, CCND1, HDAC1                                           |
| hsa05223:Non-small cell lung cancer           | 3     | 11.1111111 | 0.01237913 | CASP9, RXRA, CCND1                                                  |
| hsa04141:Protein processing in endoplasmic re | 4     | 14.8148148 | 0.01399389 | HSP90AA1, HSP90AB1, CAPN2, CAPN1                                    |
| hsa04210:Apoptosis                            | 3     | 11.1111111 | 0.01503458 | CASP9, CAPN2, CAPN1                                                 |
| hsa05212:Pancreatic cancer                    | 3     | 11.1111111 | 0.01644674 | CASP9, CCND1, VEGFA                                                 |
| hsa04510:Focal adhesion                       | 4     | 14.8148148 | 0.02365066 | PAK1, CCND1, CAPN2, VEGFA                                           |
| hsa05222:Small cell lung cancer               | 3     | 11.1111111 | 0.02721576 | CASP9, RXRA, CCND1                                                  |
| hsa04723:Retrograde endocannabinoid signalir  | 3     | 11.1111111 | 0.03739244 | FAAH, CNR1, MGLL                                                    |

# Supplementary Fig. 1

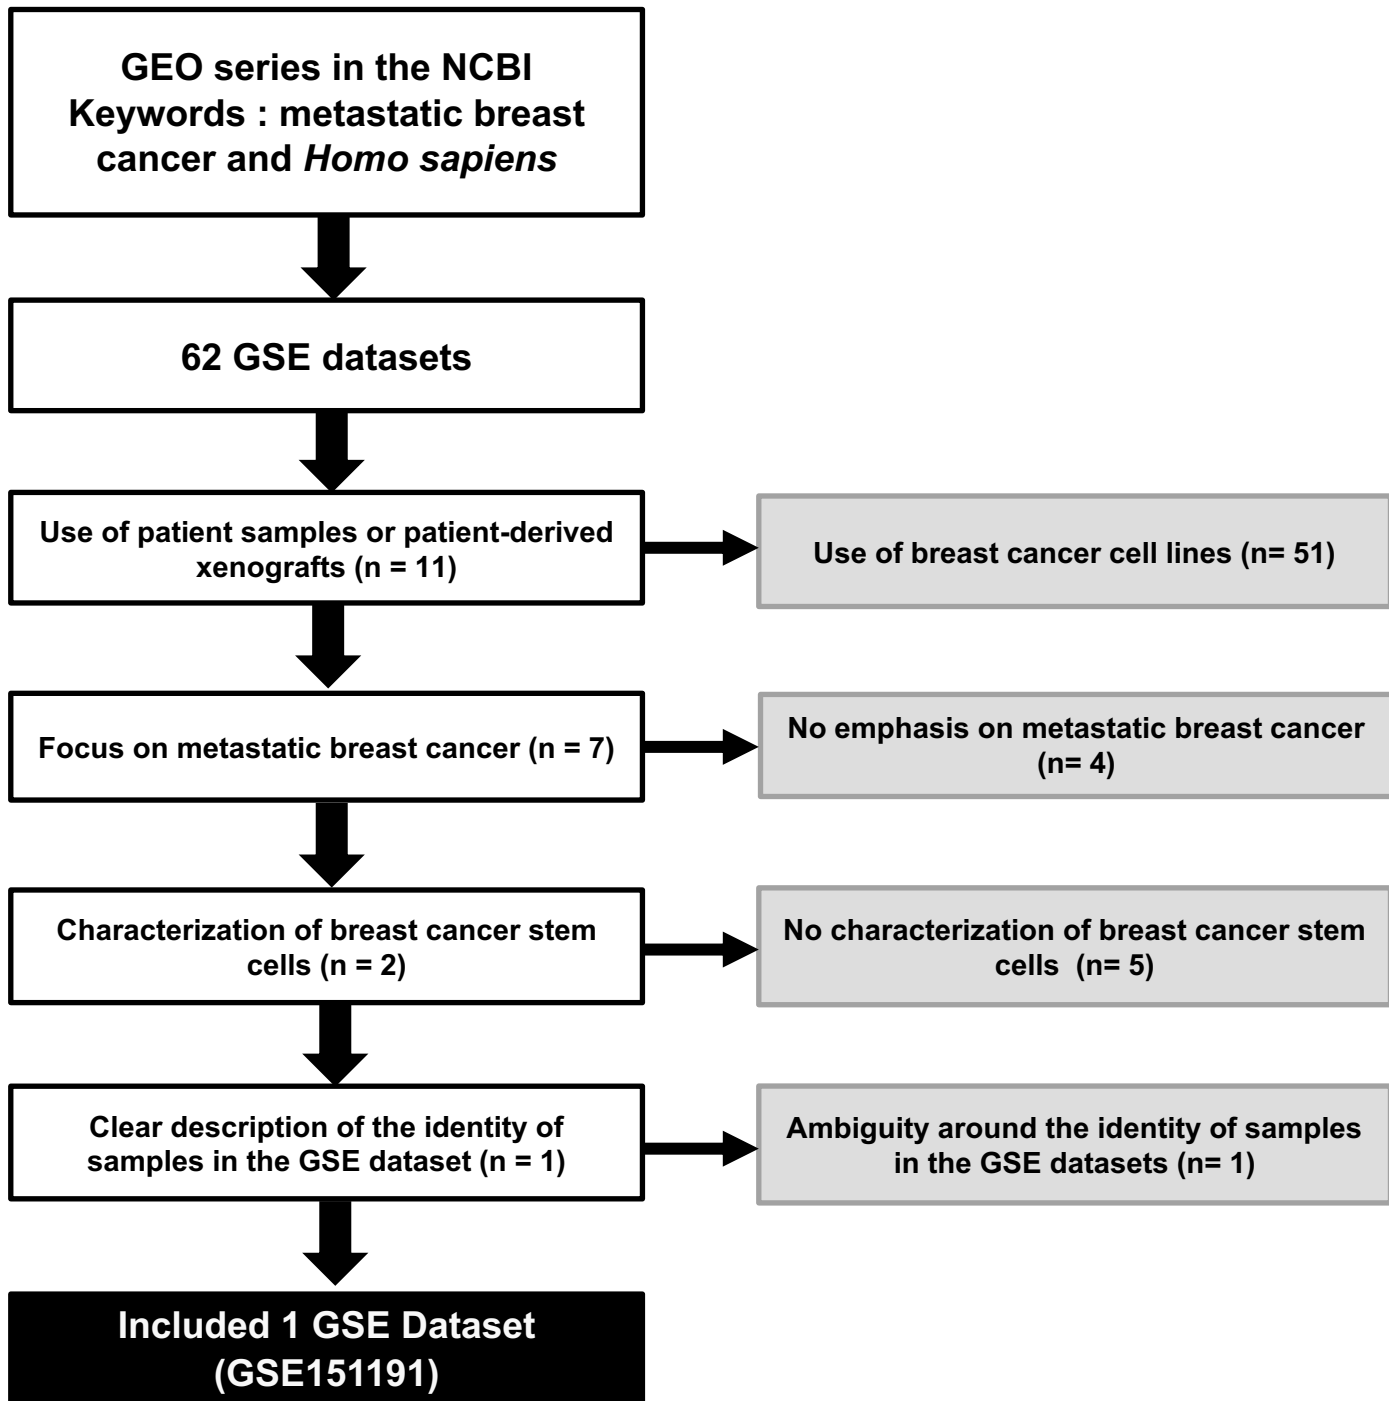

Supplement: f1 [file 4172531.f1.pdf]
